# Supplementary material for: Discovering Biomarkers for Non-Alcoholic Steatohepatitis Patients with and without Hepatocellular Carcinoma Using Fecal Metaproteomics
Source: MDPI journal article supplement (doi:10.3390/ijms23168841), 2022-08-09
Supplement: s1 [file s1]

**Supplementary Table S1.** Patient demographics, parameters of transient elastography and steatosis (CAP), serum tumor markers, and serum parameters of liver injury, cell death, inflammation bile acid, lipid and glucose metabolism. Individual p-values are stated in case of significant differences and were calculated by Kruskal-Wallis test. For the single parameters the mean and the standard deviation over all patients is shown.

|                          | Control (C)  | NASH (N)      | HCC             | p-value                                                |
|--------------------------|--------------|---------------|-----------------|--------------------------------------------------------|
| Number of subjects       | m=12/f=7     | m=20/f=12     | m=22/f=7        |                                                        |
| Age (years)              | 23.5 ± 2.7   | 53.3 ± 14.0   | 67.8 ± 10.4     | <0.001 C vs. N<br><0.001 C vs. HCC<br>0.001 N vs. HCC  |
| BMI (kg/m <sup>2</sup> ) | 23.0 ± 2.6   | 30.9 ± 6.5    | 30.3 ± 5.6      | <0.001 C vs. N<br><0.001 C vs. HCC                     |
| TE (kPa)                 | 5.4 ± 2.4    | 15.9 ± 14.2   | 37.1 ± 27.0     | <0.001 C vs. N<br><0.001 C vs. HCC<br>0.013 N vs. HCC  |
| CAP (dB/m)               | 209.1 ± 48.0 | 303.1 ± 71.7  | 290.1 ± 67.6    | <0.001 C vs. N<br>0.003 C vs. HCC                      |
| AFP-Centaur (IU/ml)      | 1.0 ± 0.0    | 36.3 ± 187.8  | 1234.8 ± 3832.9 | <0.001 C vs. N<br><0.001 C vs. HCC<br><0.001 N vs. HCC |
| AFP-L3 (%)               | 0.3 ± 0.0    | 8.4 ± 21.6    | 21.4 ± 25.2     | <0.001 C vs. HCC<br>0.002 N vs. HCC                    |
| DCP (ng/ml)              | 0.2 ± 0.0    | 1.7 ± 4.5     | 157.3 ± 353.9   | 0.003 C vs. N<br><0.001 C vs. HCC                      |
| AST (U/l)                | 26.0 ± 13.7  | 56.1 ± 43.7   | 82.7 ± 92.7     | 0.001 C vs. N<br><0.001 C vs. HCC<br>0.043 N vs. HCC   |
| ALT (U/l)                | 25.4 ± 15.0  | 66.4 ± 56.6   | 48.1 ± 19.2     | <0.001 C vs. N<br><0.001 C vs. HCC                     |
| AP (U/l)                 | 56.4 ± 16.5  | 119.3 ± 71.9  | 223.8 ± 283.2   | <0.001 C vs. N<br><0.001 C vs. HCC<br>0.042 N vs. HCC  |
| γGT (U/l)                | 18.2 ± 8.0   | 132.6 ± 120.3 | 235.2 ± 160.7   | <0.001 C vs. N<br><0.001 C vs. HCC<br>0.018 N vs. HCC  |
| GLDH (U/l)               | 2.6 ± 0.9    | 15.6 ± 30.3   | 12.0 ± 9.9      | <0.001 C vs. N<br><0.001 C vs. HCC                     |
| LDH (U/l)                | 182.1 ± 38.6 | 212.1 ± 46.8  | 251.1 ± 65.1    | 0.029 C vs. N<br><0.001 C vs. HCC<br>0.036 N vs. HCC   |
| Bilirubin (mg/dl)        | 0.7 ± 0.3    | 0.7 ± 0.3     | 1.3 ± 1.2       | n. s.                                                  |
| M65 (U/l)                | 142.6 ± 11.2 | 507.1 ± 417.4 | 438.7 ± 506.0   | <0.001 C vs. N<br><0.001 C vs. HCC                     |
| M30 (U/l)                | 116.8 ± 34.8 | 263.6 ± 200.8 | 438.7 ± 291.4   | 0.001 C vs. N<br><0.001 C vs. HCC<br>0.016 N vs. HCC   |
| IL6 (pg/ml)              | 3.1 ± 0.0    | 9.2 ± 11.7    | 20.5 ± 59.7     | 0.001 C vs. N<br>0.001 C vs. HCC                       |
| TNFα (pg/ml)             | 18.7 ± 3.6   | 17.0 ± 1.7    | 20.5 ± 59.7     | <0.001 C vs. HCC<br><0.001 N vs. HCC                   |

|                                          |              |               |               |                                                      |
|------------------------------------------|--------------|---------------|---------------|------------------------------------------------------|
| <b>LBP1<br/>(ng/ml)</b>                  | 184.8 ± 75.7 | 205.7 ± 79.1  | 184.4 ± 81.8  | n.s.                                                 |
| <b>Total bile<br/>acids<br/>(μmol/l)</b> | 4.0 ± 1.4    | 21.7 ± 4.5    | 44.5 ± 57.1   | 0.005 C vs. N<br><0.001 C vs. HCC<br>0.024 N vs. HCC |
| <b>FGF19<br/>(pg/ml)</b>                 | 26.0 ± 13.7  | 56.1 ± 43.7   | 82.7 ± 92.7   | 0.008 N vs. HCC                                      |
| <b>TAG (mg/dl)</b>                       | 113.2 ± 47.2 | 232.1 ± 145.2 | 185.2 ± 103.1 | 0.001 C vs. N<br>0.022 C vs. HCC                     |
| <b>Cholesterol<br/>(mg/dl)</b>           | 171.8 ± 24.6 | 204.1 ± 71.9  | 190.3 ± 33.4  | n. s.                                                |
| <b>LDL-<br/>Cholesterol<br/>(mg/dl)</b>  | 79.8 ± 15.8  | 116.5 ± 4.9   | 115.5 ± 32.9  | 0.001 C vs. HCC                                      |
| <b>HDL-<br/>Cholesterol<br/>(mg/dl)</b>  | 69.4 ± 19.7  | 48.8 ± 17.9   | 43.7 ± 18.9   | 0.001 C vs. N<br><0.001 C vs. HCC                    |
| <b>Adiponectin<br/>(ng/ml)</b>           | 6.1 ± 3.1    | 11.3 ± 24.1   | 13.3 ± 21.9   | n. s.                                                |
| <b>GLP1<br/>(pg/ml)</b>                  | 25.4 ± 15.0  | 66.4 ± 56.6   | 48.1 ± 19.2   | 0.001 C vs. N<br><0.001 C vs. HCC                    |
| <b>FGF21<br/>(pg/ml)</b>                 | 56.4 ± 16.5  | 119.3 ± 71.9  | 223.8 ± 283.2 | 0.001 C vs. N<br>0.001 C vs. HCC                     |
