# Supplementary material for: Discovering Biomarkers for Non-Alcoholic Steatohepatitis Patients with and without Hepatocellular Carcinoma Using Fecal Metaproteomics
Source: Int J Mol Sci. 2022 Aug 9;23(16):8841. doi: 10.3390/ijms23168841 (PMC9408600; doi:10.3390/ijms23168841)
Supplement: Supplementary file 1 [file ijms-23-08841-s001.zip]

Archive with 7 entries (7 files):
- Supplementary Figure S1.pdf
- Supplementary Table S1.pdf
- Supplementary Table S2 Comprehensive evaluation of all metaproteins_.xlsx
- Supplementary Table S3 Significant differences on taxonomy level.xlsx
- Supplementary Table S4.xlsx
- Supplementary Table S5.xlsx
- Supplementary Table S6.xlsx
