# Supplementary material for: Discovering Biomarkers for Non-Alcoholic Steatohepatitis Patients with and without Hepatocellular Carcinoma Using Fecal Metaproteomics
Source: Int J Mol Sci. 2022 Aug 9;23(16):8841. doi: 10.3390/ijms23168841 (PMC9408600; doi:10.3390/ijms23168841)
Supplement: Supplementary file 1 [file ijms-23-08841-s001.zip › Supplementary Table S2 Comprehensive evaluation of all metaproteins_.xlsx]

## Sheet: DECRIPTION
General description
This file comprise the more comprehensive evaluation of the identified metaproteins. Whereas worksheet "1" contains all metaprotein identifications with their normalized spectral abundance, the worksheets "2" to"9" focussing on certain subgroups namely all microorganisms ("2"), only human metaproteins ("3"), only bacterial metaproteins ("4"), only archaeal metaproteins ("5"), only fungi metaprote…
Overview worksheets
Table	Content
1_ALL_METAPROTEINS	This worksheet comprise all identified metaproteins and their spectral abundance normalized to the total number of spectra for each measurement. The original data could be found in the file "Identified metaproteins, families, and biological processes".
2_MICROORGANISMS	This worksheet contains only the microorganisms from the 1_ALL_Metaproteins matrix, consisting of Bacteria, Archaee, Viruses, Fungi.
3_HOMO_SAPIENS	This worksheet contains only the Homo-sapiens metaproteins from the 1_ALL_Metaproteins matrix.
4_BACTERIA	This worksheet contains only the superkingdom Bacteria from the 1_ALL_Metaproteins matrix.
5_ARCHAEA	This worksheet contains only the superkingdom Archaee from the 1_ALL_Metaproteins matrix.
6_FUNGI	This worksheet contains only the kingdom Fungi from the 1_ALL_Metaproteins matrix.
7_VIRUS	This worksheet contains only the superkingdom Virus from the 1_ALL_Metaproteins matrix.
8_METAZOA	This worksheet contains only the kingdom Metazoa from the 1_ALL_Metaproteins matrix.
9_IMMUNOGLOBULINES	This worksheet contains only the metaproteins of immunoglobulins from the 1_ALL_Metaproteins matrix.
10_SUMMARY	This worksheet contains a summary of all the detected metaproteins from the 1_ALL_Metaproteins matrix, with die KO;EC numbers and their specific abundances. This sheet contains 6 categories: Microbial Hydrolysis, Microbial Metabolism, Amino Acid Metabolism, Transporters, DNA/RNA and Homo sapiens.
11_RESULTS_MWU	This worksheet contains the results of the Mann-Whitney-U-Test of all metaproteins with a -value below 1%.
12_SUMMARY_SIGNIFICANT_HITS	This worksheet contains the summary diagrams from each of the 6 categories.
worksheet description/legend
1_ALL_METAPROTEINS
This worksheet contains the results of the MPA compare worksheet (FDR = 1%) imported into Excel, metaproteins are created considering the peptides of all samples resulting in a consistent comparison table, normed at the spectra from the ALL-matrix
Column
Metaprotein number	The number of the metaprotein.
Description	The description of the metaprotein.
Ontologies	The list of all ontologies for a metaprotein. Semicolon was added at the beginning for later summary by "SummeWenns".
EC-numbers	The list of all EC-numbers for a metaprotein. Semicolon was added at the beginning for later summary by "SummeWenns".
KO-numbers	The list of all KO numbers for a metaprotein. Semicolon was added at the beginning for later summary by "SummeWenns".
UniRef50	The UniRef50 cluster ID.
UniRef90	The UniRef50 cluster ID.
UniRef100	The UniRef100 cluster ID.
Superkingdom	The NCBI taxonomy on superkingdom level.
Kingdom	The NCBI taxonomy on kingdom level.
Phylum	The NCBI taxonomy on phylum level.
Class	The NCBI taxonomy on class level.
Order	The NCBI taxonomy on order level.
Family	The NCBI taxonomy on family level.
Genus	The NCBI taxonomy on genus level.
Species	The NCBI taxonomy on species level.
Subspecies	The NCBI taxonomy on subspecies level.
SAMPLES	All samples from the project.
Average abundance	The average of all normalized spectral abundance.
worksheet description/legend
2_MICROORGANISMS, 3_HOMO_SAPIENS, 4_BACTERIA, 5_ARCHAEA, 6_FUNGI, 7_VIRUS, 8_METAZOA
This worksheet contains only the subgroups of the "1_ALL_Metaproteins" worksheet.
Column
Metaprotein number	The number of the metaprotein.
Description	The description of the metaprotein.
Ontologies	The list of all ontologies for a metaprotein. Semicolon was added at the beginning for later summary by "SummeWenns".
EC-numbers	The list of all EC-numbers for a metaprotein. Semicolon was added at the beginning for later summary by "SummeWenns".
KO-numbers	The list of all KO numbers for a metaprotein. Semicolon was added at the beginning for later summary by "SummeWenns".
UniRef50	The UniRef50 cluster ID.
UniRef90	The UniRef50 cluster ID.
UniRef100	The UniRef100 cluster ID.
Superkingdom	The NCBI taxonomy on superkingdom level.
Kingdom	The NCBI taxonomy on kingdom level.
Phylum	The NCBI taxonomy on phylum level.
Class	The NCBI taxonomy on class level.
Order	The NCBI taxonomy on order level.
Family	The NCBI taxonomy on family level.
Genus	The NCBI taxonomy on genus level.
Species	The NCBI taxonomy on species level.
Subspecies	The NCBI taxonomy on subspecies level.
SAMPLES	All samples from the project
worksheet description/legend
9_Immunoglobolins
This worksheet contains only the metaproteins of immunoglobulins of the 1_ALL_Metaproteins worksheetsheet.
Column
Metaprotein number	The number of the metaprotein.
Description	The description of the metaprotein.
Ontologies	The list of all ontologies for a metaprotein. Semicolon was added at the beginning for later summary by "SummeWenns".
EC-numbers	The list of all EC-numbers for a metaprotein. Semicolon was added at the beginning for later summary by "SummeWenns".
KO-numbers	The list of all KO numbers for a metaprotein. Semicolon was added at the beginning for later summary by "SummeWenns".
UniRef50	The UniRef50 cluster ID.
UniRef90	The UniRef50 cluster ID.
UniRef100	The UniRef100 cluster ID.
Superkingdom	The NCBI taxonomy on superkingdom level.
Kingdom	The NCBI taxonomy on kingdom level.
Phylum	The NCBI taxonomy on phylum level.
Class	The NCBI taxonomy on class level.
Order	The NCBI taxonomy on order level.
Family	The NCBI taxonomy on family level.
Genus	The NCBI taxonomy on genus level.
Species	The NCBI taxonomy on species level.
Subspecies	The NCBI taxonomy on subspecies level.
SAMPLES	All samples from the project
worksheet description/legend
10_Summary
This worksheet contains a summary of all the detected metaproteins from the 1_ALL_Metaproteins matrix, with die KO;EC numbers and their specific abundances. This sheet contains 6 categories: Microbial Hydrolysis, Microbial Metabolism, Amino Acid Metabolism, Transporters, DNA/RNA and Homo sapiens.
Column
Reference Table	Stands for the sheet we used to compare the EC/KO numbers and for the "SUMMEWENNS".
Number	Continuous numerating for each metaprotein.
Component/ pathway	Preamble for the pathway/metaprotein.
EC number	Contains the specific EC-number we used for "SUMMEWENNS".
Name	Name of Metaprotein.
Description	Short description of the metaproteins, sometimes with pathways, educts and products
Source	The source of the description.
Sum	Sum of the Abundance of the metaprotein, calculated with "SUMMEWENNS".
Controls	Sum of the abundances of the Control-group.
ABC	Sum of the abundances of the ABC-group.
T-Test	T.Test to check significance between Control and ABC group.
worksheet description/legend
11_RESULTS_MWU
This worksheet contains the results of the Mann-Whitney U test.
worksheet description/legend
12_SUMMARY_SIGNIFICANT_HITS
This worksheet contains a summary of all significantly changed metaproteins according to Mann-Whitney U test and a p-value of 1%.

## Sheet: 1_All Metaproteins
Description	Description	Biol Processes	EC	KO	Superkingdom	Kingdom	Phylum	Class	Order	Familie	Genus	Species	Subspecies	C_01	C_02	C_03	C_04	C_05	C_06	C_07	C_08	C_09	C_10	C_11	C_12	C_13	C_14	C_15	C_16	C_17	C_18	C_19	N_20	N_21	N_22	N_23	N_24	N_25	N_26	N_27	N_28	N_29	N_30	N_31	N_32	N_33	N_34	N_35	N_36
Meta-Protein 216	BLAST_CEL3A_HUMAN Chymotrypsin-like elastase family member 3A OS=Homo sapiens GN=CELA3A PE=1 SV=3_P09093	3D-structure;Complete proteome;Digestion;Direct protein sequencing;Disulfide bond;Glycoprotein;Hydrolase;Polymorphism;Protease;Reference proteome;Secreted;Serine protease;Serine protease homolog;Signal;Zymogen;	;3.4.21.70;	;K01345;	Eukaryota	Metazoa	Chordata	Mammalia	Unknown ORDER	Unknown FAMILY	Unknown GENUS	Unknown SPECIES	Unknown SUBSPECIES	903	413	327	381	1512	487	540	387	348	272	184	363	288	344	140	149	267	165	212	544	2583	186	1054	891	1669	552	876	1971	2775	1346	486	784	1325	599	531	1057
Meta-Protein 15	BLAST_KCP_MOUSE Kielin/chordin-like protein OS=Mus musculus GN=Kcp PE=1 SV=2_Q3U492	Alternative splicing;Calcium;Cell adhesion;Cell membrane;Coiled coil;Complete proteome;Direct protein sequencing;Disulfide bond;EGF-like domain;Glycoprotein;Membrane;Polymorphism;Reference proteome;Repeat;Secreted;Signal;Transmembrane;Transmembrane helix;	;	;	Eukaryota	Metazoa	Chordata	Mammalia	Unknown ORDER	Unknown FAMILY	Unknown GENUS	Unknown SPECIES	Unknown SUBSPECIES	241	86	0	112	117	54	330	207	200	144	76	200	145	118	67	97	66	2	74	420	1590	431	1082	2025	1323	304	640	1221	1443	1107	302	492	711	90	361	746
Meta-Protein 3	EFTU1_YERPA Elongation factor Tu 1 OS=Yersinia pestis bv. Antiqua (strain Antiqua) GN=tuf1 PE=3 SV=1	;3D-structure;Acetylation;Alternative splicing;Antibiotic resistance;Apicoplast;Cell inner membrane;Cell membrane;Chloroplast;Complete proteome;Cyanelle;Cytoplasm;Direct protein sequencing;Disease mutation;Elongation factor;GTP-binding;Glycoprotein;Membrane;Methylation;Mitochondrion;Nucleotide-binding;Phosphoprotein;Plasmid;Plastid;Primary mitochondrial disease;Protein biosynthesis;RNA-binding;Re…	;	;K02358;	Unknown SUPERKINGDOM	Unknown KINGDOM	Unknown PHYLUM	Unknown CLASS	Unknown ORDER	Unknown FAMILY	Unknown GENUS	Unknown SPECIES	Unknown SUBSPECIES	341	670	585	153	215	754	656	686	1087	539	107	719	373	395	63	144	430	192	68	438	107	630	270	195	255	692	235	414	300	726	255	49	529	1220	202	158
Meta-Protein 289	AMY1_HUMAN Alpha-amylase 1 OS=Homo sapiens GN=AMY1A PE=1 SV=2	3D-structure;ATP-binding;Alternative splicing;Calcium;Carbohydrate metabolism;Chloride;Complete proteome;Cytoplasm;Direct protein sequencing;Disulfide bond;Glycoprotein;Glycosidase;Hydrolase;Metal-binding;Nucleotide-binding;Polymorphism;Protease;Pyrrolidone carboxylic acid;Reference proteome;Secreted;Serine protease;Signal;Stress response;	3.2.1.1;3.4.21.53;	;K01176;K01338;	Unknown SUPERKINGDOM	Unknown KINGDOM	Unknown PHYLUM	Unknown CLASS	Unknown ORDER	Unknown FAMILY	Unknown GENUS	Unknown SPECIES	Unknown SUBSPECIES	51	50	8	271	125	116	71	69	40	266	190	13	45	34	101	39	16	145	240	510	1154	0	354	107	871	4	382	805	312	46	117	728	400	47	145	863
Meta-Protein 53	BLAST_G3P_LACDE Glyceraldehyde-3-phosphate dehydrogenase OS=Lactobacillus delbrueckii subsp. bulgaricus GN=gap PE=3 SV=1_O32755	3D-structure;Calvin cycle;Chloroplast;Complete proteome;Cytoplasm;Direct protein sequencing;Glycolysis;Glycosyltransferase;Isopeptide bond;NAD;NADP;Nucleotide-binding;Oxidoreductase;Plastid;Reference proteome;Transferase;Transit peptide;Ubl conjugation;	1.2.1.12;1.2.1.13;1.2.1.59;2.4.2.4;	;K00134;K00150;	Unknown SUPERKINGDOM	Unknown KINGDOM	Unknown PHYLUM	Unknown CLASS	Unknown ORDER	Unknown FAMILY	Unknown GENUS	Unknown SPECIES	Unknown SUBSPECIES	237	357	252	136	157	535	428	382	506	406	60	398	263	212	69	133	224	143	101	209	465	244	128	66	135	383	140	302	54	351	89	124	195	449	155	6
Meta-Protein 119	BLAST_IGHA2_HUMAN Immunoglobulin heavy constant alpha 2 OS=Homo sapiens GN=IGHA2 PE=1 SV=4_P01877	3D-structure;Adaptive immunity;Cell membrane;Chromophore;Chromosomal rearrangement;Complete proteome;Direct protein sequencing;Disease mutation;Disulfide bond;Glycoprotein;Immunity;Immunoglobulin C region;Immunoglobulin V region;Immunoglobulin domain;Membrane;Polymorphism;Pyrrolidone carboxylic acid;Reference proteome;Repeat;Secreted;Signal;	;	;	Unknown SUPERKINGDOM	Unknown KINGDOM	Unknown PHYLUM	Unknown CLASS	Unknown ORDER	Unknown FAMILY	Unknown GENUS	Unknown SPECIES	Unknown SUBSPECIES	381	128	0	74	91	232	380	121	257	159	51	117	84	120	81	62	62	72	30	66	459	49	247	998	1180	136	206	319	547	257	614	125	421	255	161	357
Meta-Protein 198	BLAST_G3PC1_MAIZE Glyceraldehyde-3-phosphate dehydrogenase 1, cytosolic OS=Zea mays GN=GAPC1 PE=2 SV=2_P08735	3D-structure;ADP-ribosylation;Acetylation;Alternative splicing;Apoptosis;Calvin cycle;Cell wall;Cell wall biogenesis/degradation;Chloroplast;Complete proteome;Cytoplasm;Cytoskeleton;DNA-binding;Direct protein sequencing;Glutathionylation;Glycolysis;Glycosome;Isopeptide bond;Membrane;Methylation;NAD;NADP;Nucleotide-binding;Nucleus;Oxidation;Oxidoreductase;Peroxisome;Phosphoprotein;Plastid;Polymorp…	1.2.1.12;1.2.1.59;2.6.99.-;	;K00134;K10705;	Unknown SUPERKINGDOM	Unknown KINGDOM	Unknown PHYLUM	Unknown CLASS	Unknown ORDER	Unknown FAMILY	Unknown GENUS	Unknown SPECIES	Unknown SUBSPECIES	291	109	209	105	583	205	339	181	220	108	66	271	44	147	65	60	42	66	72	112	136	576	264	136	318	226	148	157	409	729	180	181	381	334	74	324
Meta-Protein 9	BLAST_PPDK_CLOSY Pyruvate, phosphate dikinase OS=Clostridium symbiosum GN=ppdK PE=1 SV=5_P22983	3D-structure;ATP-binding;Acetylation;Alternative promoter usage;Alternative splicing;Chloroplast;Complete proteome;Cytoplasm;Direct protein sequencing;Kinase;Magnesium;Metal-binding;Nucleotide-binding;Phosphoprotein;Photosynthesis;Plastid;Pyruvate;Reference proteome;Transferase;Transit peptide;	2.7.9.1;2.7.9.2;	;K01006;K01007;	Unknown SUPERKINGDOM	Unknown KINGDOM	Unknown PHYLUM	Unknown CLASS	Unknown ORDER	Unknown FAMILY	Unknown GENUS	Unknown SPECIES	Unknown SUBSPECIES	295	440	261	90	137	400	366	507	658	512	46	573	225	204	33	98	266	80	46	183	4	157	128	52	141	506	45	10	23	223	87	99	102	785	160	0
Meta-Protein 8	BLAST_NIFJ_ANAVA Pyruvate-flavodoxin oxidoreductase (Fragment) OS=Anabaena variabilis GN=nifJ PE=3 SV=1_P0C181	3D-structure;4Fe-4S;ATP-binding;Acyltransferase;Calcium;Cell shape;Cell wall biogenesis/degradation;Complete proteome;Cytoplasm;DNA damage;DNA repair;DNA-binding;Direct protein sequencing;Disulfide bond;Electron transport;FAD;FMN;Flavoprotein;Iron;Iron-sulfur;Ligase;Magnesium;Metal-binding;Mitochondrion;NADP;Nitrogen fixation;Nucleotide-binding;Oxidoreductase;Peptidoglycan synthesis;Plasmid;Pyruv…	;1.16.1.5;1.2.1.51;1.2.7.-;1.2.7.1;2.3.2.17;6.3.2.29;6.3.2.30;	;K03555;K03737;K03802;K11694;K21682;	Unknown SUPERKINGDOM	Unknown KINGDOM	Unknown PHYLUM	Unknown CLASS	Unknown ORDER	Unknown FAMILY	Unknown GENUS	Unknown SPECIES	Unknown SUBSPECIES	242	407	187	43	115	390	254	402	552	472	25	319	205	174	63	89	202	146	69	142	3	325	169	81	68	291	94	34	48	139	26	52	195	572	116	2
Meta-Protein 167	BLAST_PCKA_EUBE2 Phosphoenolpyruvate carboxykinase (ATP) OS=Eubacterium eligens (strain ATCC 27750 / VPI C15-48) GN=pckA PE=3 SV=1_C4Z0Q6	3D-structure;ATP-binding;Acetylation;Allosteric enzyme;Calcium;Complete proteome;Cytoplasm;Decarboxylase;Direct protein sequencing;Gluconeogenesis;Lyase;Magnesium;Manganese;Metal-binding;Nucleotide-binding;Reference proteome;	4.1.1.49;	;K01610;	Unknown SUPERKINGDOM	Unknown KINGDOM	Unknown PHYLUM	Unknown CLASS	Unknown ORDER	Unknown FAMILY	Unknown GENUS	Unknown SPECIES	Unknown SUBSPECIES	266	169	199	122	235	420	371	253	376	227	24	323	101	231	76	133	93	64	52	148	11	323	180	157	324	287	107	136	280	141	34	175	134	307	165	97
Meta-Protein 49	BLAST_IGKC_HUMAN Immunoglobulin kappa constant OS=Homo sapiens GN=IGKC PE=1 SV=2_P01834	3D-structure;Adaptive immunity;Cell adhesion;Cell membrane;Complete proteome;Direct protein sequencing;Disease mutation;Disulfide bond;GPI-anchor;Glycoprotein;Hybridoma;Immunity;Immunoglobulin C region;Immunoglobulin V region;Immunoglobulin domain;Lipoprotein;Membrane;Monoclonal antibody;Polymorphism;Reference proteome;Repeat;Secreted;Signal;	;	;K06760;	Unknown SUPERKINGDOM	Unknown KINGDOM	Unknown PHYLUM	Unknown CLASS	Unknown ORDER	Unknown FAMILY	Unknown GENUS	Unknown SPECIES	Unknown SUBSPECIES	214	17	1	93	28	93	188	54	181	66	49	51	21	66	37	69	19	45	16	64	261	19	252	461	759	57	173	281	315	250	266	117	493	91	81	211
Meta-Protein 65	Metagenome unknown				Unknown SUPERKINGDOM	Unknown KINGDOM	Unknown PHYLUM	Unknown CLASS	Unknown ORDER	Unknown FAMILY	Unknown GENUS	Unknown SPECIES	Unknown SUBSPECIES	94	159	148	49	56	280	276	296	312	212	38	224	82	217	39	91	159	84	61	106	10	332	106	128	132	200	78	41	96	168	52	146	154	452	134	72
Meta-Protein 1	BLAST_DHE2_BACFR NAD-specific glutamate dehydrogenase OS=Bacteroides fragilis (strain YCH46) GN=gdhB PE=2 SV=2_P94316	3D-structure;Acetylation;Chloroplast;Complete proteome;Direct protein sequencing;Isopeptide bond;NAD;NADP;Oxidoreductase;Phosphoprotein;Plastid;Reference proteome;Ubl conjugation;	1.4.1.2;1.4.1.3;1.4.1.4;	;K00262;	Unknown SUPERKINGDOM	Unknown KINGDOM	Unknown PHYLUM	Unknown CLASS	Unknown ORDER	Unknown FAMILY	Unknown GENUS	Unknown SPECIES	Unknown SUBSPECIES	272	231	187	27	576	293	239	203	237	173	43	291	52	128	31	72	72	116	59	120	65	174	110	94	212	185	52	108	88	284	28	96	237	331	91	26
Meta-Protein 98	CEL2A_HUMAN Chymotrypsin-like elastase family member 2A OS=Homo sapiens GN=CELA2A PE=1 SV=1	3D-structure;Complete proteome;Direct protein sequencing;Disulfide bond;Hydrolase;Polymorphism;Protease;Reference proteome;Secreted;Serine protease;Signal;Zymogen;	3.4.21.71;	K01346;	Eukaryota	Metazoa	Chordata	Mammalia	Unknown ORDER	Unknown FAMILY	Unknown GENUS	Unknown SPECIES	Unknown SUBSPECIES	183	24	23	81	139	31	64	27	4	36	27	17	6	11	62	2	1	5	71	6	628	11	37	11	47	2	153	1447	1041	8	208	104	177	19	16	212
Meta-Protein 128	CTRC_HUMAN Chymotrypsin-C OS=Homo sapiens GN=CTRC PE=1 SV=2	3D-structure;Complete proteome;Disease mutation;Disulfide bond;Glycoprotein;Hydrolase;Polymorphism;Protease;Reference proteome;Secreted;Serine protease;Signal;Zymogen;	3.4.21.-;3.4.21.2;	;K01311;	Eukaryota	Metazoa	Chordata	Mammalia	Unknown ORDER	Unknown FAMILY	Unknown GENUS	Unknown SPECIES	Unknown SUBSPECIES	211	56	15	74	280	50	118	105	80	68	49	54	50	90	47	53	62	26	53	51	675	43	103	100	204	111	168	278	289	199	49	249	254	108	221	198
Meta-Protein 33	BLAST_A1AT_HUMAN Alpha-1-antitrypsin OS=Homo sapiens GN=SERPINA1 PE=1 SV=3_P01009	3D-structure;Acute phase;Alternative splicing;Blood coagulation;Complete proteome;Direct protein sequencing;Endoplasmic reticulum;Extracellular matrix;Glycoprotein;Hemostasis;Phosphoprotein;Polymorphism;Protease inhibitor;Reference proteome;Secreted;Serine protease inhibitor;Signal;	;	;K03984;K04525;	Eukaryota	Metazoa	Chordata	Mammalia	Unknown ORDER	Unknown FAMILY	Unknown GENUS	Unknown SPECIES	Unknown SUBSPECIES	145	52	101	31	106	116	152	41	130	71	61	76	38	73	27	47	12	53	38	88	201	134	153	175	179	96	161	174	205	448	99	131	219	16	130	95
Meta-Protein 27	BLAST_CH60_AGARV 60 kDa chaperonin OS=Agathobacter rectalis (strain ATCC 33656 / DSM 3377 / JCM 17463 / KCTC 5835 / VPI 0990) GN=groL PE=3 SV=1_C4ZD46	3D-structure;ATP-binding;Acetylation;Cell cycle;Cell division;Cell outer membrane;Chaperone;Chloroplast;Complete proteome;Cytoplasm;Developmental protein;Differentiation;Direct protein sequencing;Membrane;Mitochondrion;Nucleotide-binding;Oogenesis;Phosphoprotein;Plasmid;Plastid;Reference proteome;Spermatogenesis;Stress response;Transit peptide;	;	;K04077;	Unknown SUPERKINGDOM	Unknown KINGDOM	Unknown PHYLUM	Unknown CLASS	Unknown ORDER	Unknown FAMILY	Unknown GENUS	Unknown SPECIES	Unknown SUBSPECIES	94	118	82	44	56	135	414	171	340	63	29	170	95	37	47	19	31	35	31	222	321	158	41	57	187	263	86	66	45	331	192	129	166	206	23	141
Meta-Protein 70	BLAST_RRBR2_CLOAB Reverse rubrerythrin-2 OS=Clostridium acetobutylicum (strain ATCC 824 / DSM 792 / JCM 1419 / LMG 5710 / VKM B-1787) GN=rbr3B PE=1 SV=1_Q97D83	3D-structure;Complete proteome;Cytoplasm;Detoxification;Direct protein sequencing;Electron transport;Iron;Metal-binding;NAD;Oxidoreductase;Peroxidase;Reference proteome;Stress response;Transport;Zinc;	;1.11.1.1;	;K19824;	Unknown SUPERKINGDOM	Unknown KINGDOM	Unknown PHYLUM	Unknown CLASS	Unknown ORDER	Unknown FAMILY	Unknown GENUS	Unknown SPECIES	Unknown SUBSPECIES	76	187	216	67	168	163	188	207	310	137	82	244	103	88	46	51	104	70	62	123	1	52	95	92	96	208	93	32	67	295	24	82	237	248	74	70
Meta-Protein 129	BLAST_CBPA1_HUMAN Carboxypeptidase A1 OS=Homo sapiens GN=CPA1 PE=1 SV=2_P15085	3D-structure;ATP-binding;Activator;Blood coagulation;Carboxypeptidase;Cell membrane;Chaperone;Cleavage on pair of basic residues;Coiled coil;Complete proteome;Cytoplasm;Cytoskeleton;DNA damage;DNA recombination;DNA repair;DNA replication;DNA-binding;DNA-directed DNA polymerase;Direct protein sequencing;Disulfide bond;Exonuclease;Fibrinolysis;G-protein coupled receptor;Glycoprotein;Glycosyltransfe…	;2.4.1.-;2.7.10.1;2.7.7.7;3.1.3.4;3.4.17.-;3.4.17.1;3.4.17.2;3.4.17.20;	;K01291;K01300;K02335;K03695;K04257;K08779;K08781;K11257;	Unknown SUPERKINGDOM	Unknown KINGDOM	Unknown PHYLUM	Unknown CLASS	Unknown ORDER	Unknown FAMILY	Unknown GENUS	Unknown SPECIES	Unknown SUBSPECIES	79	86	55	43	129	11	149	42	139	71	54	5	34	120	90	90	60	36	32	42	307	163	109	34	355	4	296	766	172	50	277	117	101	26	185	189
Meta-Protein 106	BLAST_FLA_BACHD Flagellin OS=Bacillus halodurans (strain ATCC BAA-125 / DSM 18197 / FERM 7344 / JCM 9153 / C-125) GN=hag PE=1 SV=1_Q05203	3D-structure;Bacterial flagellum;Cell wall;Coiled coil;Complete proteome;Direct protein sequencing;Glycoprotein;Periplasm;Phosphoprotein;Reference proteome;Secreted;Virulence;	;	;K02406;	Unknown SUPERKINGDOM	Unknown KINGDOM	Unknown PHYLUM	Unknown CLASS	Unknown ORDER	Unknown FAMILY	Unknown GENUS	Unknown SPECIES	Unknown SUBSPECIES	33	221	304	38	266	93	13	428	253	75	65	215	79	67	12	75	60	39	41	161	0	113	9	154	70	170	74	238	2	99	47	87	439	279	24	2
Meta-Protein 141	PIGR_HUMAN Polymeric immunoglobulin receptor OS=Homo sapiens GN=PIGR PE=1 SV=4	3D-structure;Cell membrane;Complete proteome;Direct protein sequencing;Disulfide bond;Glycoprotein;Immunoglobulin domain;Membrane;Phosphoprotein;Polymorphism;Reference proteome;Repeat;Secreted;Signal;Transmembrane;Transmembrane helix;	;	K13073;	Eukaryota	Metazoa	Chordata	Mammalia	Primates	Hominidae	Homo	Homo sapiens	Unknown SUBSPECIES	86	64	0	10	25	99	132	76	113	107	13	56	24	43	29	20	55	49	7	80	98	1	114	1077	325	59	112	115	154	83	163	102	135	97	135	201
Meta-Protein 113	BLAST_ACDS_CLOAB Acyl-CoA dehydrogenase, short-chain specific OS=Clostridium acetobutylicum (strain ATCC 824 / DSM 792 / JCM 1419 / LMG 5710 / VKM B-1787) GN=bcd PE=1 SV=1_P52042	3D-structure;Complete proteome;Direct protein sequencing;Electron transport;FAD;Fatty acid metabolism;Flavoprotein;Formylation;Iron;Lipid degradation;Lipid metabolism;Metal-binding;Oxidoreductase;Reference proteome;Sporulation;Transport;	;1.3.8.1;1.3.99.-;	;K00248;K18244;	Unknown SUPERKINGDOM	Unknown KINGDOM	Unknown PHYLUM	Unknown CLASS	Unknown ORDER	Unknown FAMILY	Unknown GENUS	Unknown SPECIES	Unknown SUBSPECIES	121	236	104	73	241	204	142	216	174	193	10	147	104	131	44	43	117	37	48	88	26	71	29	68	24	206	56	13	18	35	14	115	84	88	113	10
Meta-Protein 403	BLAST_CTRB1_HUMAN Chymotrypsinogen B OS=Homo sapiens GN=CTRB1 PE=2 SV=2_P17538	3D-structure;Complete proteome;Digestion;Disulfide bond;Hydrolase;Phosphoprotein;Polymorphism;Protease;Reference proteome;Secreted;Serine protease;Signal;Zymogen;	3.4.21.1;	K01310;	Eukaryota	Metazoa	Chordata	Mammalia	Unknown ORDER	Unknown FAMILY	Unknown GENUS	Unknown SPECIES	Unknown SUBSPECIES	73	18	11	61	71	25	83	43	68	22	24	34	18	19	15	8	34	25	50	24	221	18	76	45	110	19	61	435	80	43	157	50	97	14	132	77
Meta-Protein 924	GLUD1_ORYSJ Glutelin type-D 1 OS=Oryza sativa subsp. japonica GN=GLUD1 PE=2 SV=1	Cell cycle;Cell division;Cell membrane;Cell shape;Cell wall biogenesis/degradation;Chloroplast;Complete proteome;Direct protein sequencing;Disulfide bond;Glycosyltransferase;Membrane;Peptidoglycan synthesis;Plastid;Polymorphism;Reference proteome;Ribonucleoprotein;Ribosomal protein;Seed storage protein;Signal;Storage protein;Transferase;Vacuole;	;2.4.1.227;	;K02563;	Unknown SUPERKINGDOM	Unknown KINGDOM	Unknown PHYLUM	Unknown CLASS	Unknown ORDER	Unknown FAMILY	Unknown GENUS	Unknown SPECIES	Unknown SUBSPECIES	8	36	144	0	5	255	75	166	229	611	1	67	169	8	191	9	72	104	15	0	0	9	0	26	4	156	18	0	16	0	39	0	0	8	0	0
Meta-Protein 287	PPBI_HUMAN Intestinal-type alkaline phosphatase OS=Homo sapiens GN=ALPI PE=1 SV=2	3D-structure;Cell membrane;Complete proteome;Direct protein sequencing;Disulfide bond;GPI-anchor;Glycoprotein;Hydrolase;Lipoprotein;Magnesium;Membrane;Metal-binding;Polymorphism;Reference proteome;Signal;Transmembrane;Transmembrane helix;Zinc;	3.1.3.1;	;K01077;	Eukaryota	Metazoa	Chordata	Mammalia	Unknown ORDER	Unknown FAMILY	Unknown GENUS	Unknown SPECIES	Unknown SUBSPECIES	83	30	0	59	141	20	8	33	39	42	31	23	81	9	21	35	5	0	31	5	228	103	145	105	180	0	111	261	191	3	150	170	72	53	86	56
Meta-Protein 1250	Metagenome unknown	3D-structure;Aminopeptidase;Angiogenesis;Cell membrane;Complete proteome;Developmental protein;Differentiation;Direct protein sequencing;Disulfide bond;Glycoprotein;Host cell receptor for virus entry;Host-virus interaction;Hydrolase;Membrane;Metal-binding;Metalloprotease;Phosphoprotein;Polymorphism;Protease;Receptor;Reference proteome;Signal-anchor;Sulfation;Transmembrane;Transmembrane helix;Zinc;	3.4.11.2;	K11140;	Unknown SUPERKINGDOM	Unknown KINGDOM	Unknown PHYLUM	Unknown CLASS	Unknown ORDER	Unknown FAMILY	Unknown GENUS	Unknown SPECIES	Unknown SUBSPECIES	23	0	0	64	14	0	32	0	36	0	47	0	0	3	0	7	0	0	3	0	498	45	82	292	292	0	158	436	254	208	302	77	183	0	65	129
Meta-Protein 283	BLAST_HBD_CLOAB 3-hydroxybutyryl-CoA dehydrogenase OS=Clostridium acetobutylicum (strain ATCC 824 / DSM 792 / JCM 1419 / LMG 5710 / VKM B-1787) GN=hbd PE=1 SV=2_P52041	Complete proteome;Fatty acid metabolism;Lipid metabolism;NADP;Oxidoreductase;Reference proteome;	1.1.1.157;	K00074;	Unknown SUPERKINGDOM	Unknown KINGDOM	Unknown PHYLUM	Unknown CLASS	Unknown ORDER	Unknown FAMILY	Unknown GENUS	Unknown SPECIES	Unknown SUBSPECIES	79	117	95	65	75	138	166	159	228	108	25	131	53	111	21	64	62	41	34	69	0	62	14	65	2	229	46	6	0	37	2	118	104	113	94	0
Meta-Protein 145	Metagenome unknown	3D-structure;Complete proteome;Direct protein sequencing;Periplasm;Reference proteome;Signal;Sugar transport;Transport;	;	K10108;K15770;	Unknown SUPERKINGDOM	Unknown KINGDOM	Unknown PHYLUM	Unknown CLASS	Unknown ORDER	Unknown FAMILY	Unknown GENUS	Unknown SPECIES	Unknown SUBSPECIES	50	105	203	21	61	196	64	135	402	26	9	88	74	67	3	48	64	28	50	88	0	48	11	108	0	76	37	19	6	71	0	121	10	312	85	49
Meta-Protein 111	MGA_HUMAN Maltase-glucoamylase, intestinal OS=Homo sapiens GN=MGAM PE=1 SV=5	3D-structure;Alternative splicing;Cell membrane;Complete proteome;Direct protein sequencing;Disease mutation;Disulfide bond;Glycoprotein;Glycosidase;Hydrolase;Membrane;Multifunctional enzyme;Phosphoprotein;Polymorphism;Reference proteome;Repeat;Signal-anchor;Sulfation;Transmembrane;Transmembrane helix;	3.2.1.10;3.2.1.20;3.2.1.3;3.2.1.48;	;K01203;K12047;	Eukaryota	Metazoa	Chordata	Mammalia	Unknown ORDER	Unknown FAMILY	Unknown GENUS	Unknown SPECIES	Unknown SUBSPECIES	94	0	26	40	113	107	139	91	36	36	14	68	70	73	36	57	0	41	65	13	86	100	191	129	64	4	66	170	199	102	226	116	90	0	52	33
Meta-Protein 109	DNAK_CLOTH Chaperone protein DnaK OS=Clostridium thermocellum (strain ATCC 27405 / DSM 1237 / NBRC 103400 / NCIMB 10682 / NRRL B-4536 / VPI 7372) GN=dnaK PE=3 SV=1	3D-structure;ATP-binding;Acetylation;Allergen;Alternative initiation;Alternative splicing;Cell inner membrane;Cell membrane;Cell wall;Chaperone;Chloroplast;Coiled coil;Complete proteome;Cyanelle;Cytoplasm;Cytoskeleton;DNA replication;Developmental protein;Differentiation;Direct protein sequencing;Endoplasmic reticulum;Glycoprotein;Host cell receptor for virus entry;Host-virus interaction;Isopepti…	;	;K03283;K04043;K04044;K09490;	Unknown SUPERKINGDOM	Unknown KINGDOM	Unknown PHYLUM	Unknown CLASS	Unknown ORDER	Unknown FAMILY	Unknown GENUS	Unknown SPECIES	Unknown SUBSPECIES	49	80	73	23	33	83	192	101	365	49	18	115	73	18	33	34	43	13	19	74	30	94	61	37	38	105	66	89	15	92	50	57	82	153	29	109
Meta-Protein 222	EFG_MYCLE Elongation factor G OS=Mycobacterium leprae (strain TN) GN=fusA PE=3 SV=2	3D-structure;Acetylation;Alternative splicing;Chloroplast;Complete proteome;Cytoplasm;Direct protein sequencing;Elongation factor;GTP-binding;Isopeptide bond;Mitochondrion;Nucleotide-binding;Phosphoprotein;Plasmid;Plastid;Polymorphism;Protein biosynthesis;Reference proteome;Transit peptide;Ubl conjugation;	;	;K02355;	Unknown SUPERKINGDOM	Unknown KINGDOM	Unknown PHYLUM	Unknown CLASS	Unknown ORDER	Unknown FAMILY	Unknown GENUS	Unknown SPECIES	Unknown SUBSPECIES	51	108	71	11	18	139	85	92	191	99	13	89	64	74	22	47	79	42	11	35	11	199	57	36	8	85	19	115	20	71	22	26	44	201	41	91
Meta-Protein 20	BLAST_ENO_BACTN Enolase OS=Bacteroides thetaiotaomicron (strain ATCC 29148 / DSM 2079 / NCTC 10582 / E50 / VPI-5482) GN=eno PE=3 SV=1_Q89Z05	3D-structure;Acetylation;Allergen;Complete proteome;Cytoplasm;Cytoskeleton;Direct protein sequencing;Glycolysis;Lyase;Magnesium;Metal-binding;Phosphoprotein;Reference proteome;Secreted;Sporulation;Stress response;Virulence;	4.2.1.11;	;K01689;	Unknown SUPERKINGDOM	Unknown KINGDOM	Unknown PHYLUM	Unknown CLASS	Unknown ORDER	Unknown FAMILY	Unknown GENUS	Unknown SPECIES	Unknown SUBSPECIES	24	61	62	7	18	52	213	29	111	23	3	58	11	46	2	10	23	31	6	40	148	188	18	68	153	184	36	165	17	34	65	3	61	39	128	112
Meta-Protein 153	BLAST_DMBT1_RABIT Deleted in malignant brain tumors 1 protein OS=Oryctolagus cuniculus GN=Dmbt1 PE=1 SV=2_Q95218	Alternative splicing;Antiviral defense;Complete proteome;Cytoplasmic vesicle;Developmental protein;Differentiation;Direct protein sequencing;Disulfide bond;Glycoprotein;Host-virus interaction;Membrane;Phosphoprotein;Polymorphism;Protein transport;Reference proteome;Repeat;Secreted;Signal;Transmembrane;Transmembrane helix;Transport;Tumor suppressor;	;	K13912;	Eukaryota	Metazoa	Chordata	Mammalia	Unknown ORDER	Unknown FAMILY	Unknown GENUS	Unknown SPECIES	Unknown SUBSPECIES	51	32	30	13	10	21	34	22	32	21	10	3	23	39	32	6	7	11	10	12	125	77	52	28	118	21	58	148	183	62	52	112	62	44	118	10
Meta-Protein 334	LIPP_HUMAN Pancreatic triacylglycerol lipase OS=Homo sapiens GN=PNLIP PE=1 SV=1	3D-structure;Calcium;Complete proteome;Direct protein sequencing;Disease mutation;Disulfide bond;Glycoprotein;Hibernation;Hydrolase;Lipid degradation;Lipid metabolism;Metal-binding;Reference proteome;Secreted;Signal;	3.1.1.26;3.1.1.3;	;K14073;K14075;	Unknown SUPERKINGDOM	Unknown KINGDOM	Unknown PHYLUM	Unknown CLASS	Unknown ORDER	Unknown FAMILY	Unknown GENUS	Unknown SPECIES	Unknown SUBSPECIES	6	32	1	8	6	4	32	22	41	4	5	18	7	7	10	2	7	6	4	4	194	74	18	5	43	31	44	123	0	52	109	24	6	0	112	3
Meta-Protein 375	BLAST_TRY6_HUMAN Putative trypsin-6 OS=Homo sapiens GN=PRSS3P2 PE=5 SV=2_Q8NHM4	3D-structure;Alternative splicing;Calcium;Complete proteome;Digestion;Direct protein sequencing;Disease mutation;Disulfide bond;Hydrolase;Metal-binding;Polymorphism;Protease;Reference proteome;Secreted;Serine protease;Signal;Sulfation;Zymogen;	3.4.21.4;	;K01312;	Unknown SUPERKINGDOM	Unknown KINGDOM	Unknown PHYLUM	Unknown CLASS	Unknown ORDER	Unknown FAMILY	Unknown GENUS	Unknown SPECIES	Unknown SUBSPECIES	43	17	10	51	60	22	69	42	72	17	47	57	53	98	21	43	14	13	29	20	230	24	65	40	118	42	55	121	80	92	140	76	105	19	50	85
Meta-Protein 149	CLCA1_MACMU Calcium-activated chloride channel regulator 1 OS=Macaca mulatta GN=CLCA1 PE=2 SV=1	Alternative splicing;Autocatalytic cleavage;Calcium;Calcium transport;Cell membrane;Chloride;Complete proteome;Direct protein sequencing;Glycoprotein;Hydrolase;Ion transport;Membrane;Metal-binding;Metalloprotease;Phosphoprotein;Polymorphism;Protease;Reference proteome;Secreted;Signal;Transmembrane;Transmembrane helix;Transport;Zinc;	3.4.-.-;	K05027;K05030;	Eukaryota	Metazoa	Chordata	Mammalia	Unknown ORDER	Unknown FAMILY	Unknown GENUS	Unknown SPECIES	Unknown SUBSPECIES	67	39	14	13	16	66	73	53	46	24	20	74	12	21	13	23	8	13	29	9	125	2	96	187	143	2	94	189	187	2	132	94	16	60	53	97
Meta-Protein 454	S10A9_HUMAN Protein S100-A9 OS=Homo sapiens GN=S100A9 PE=1 SV=1	3D-structure;4Fe-4S;Antimicrobial;Antioxidant;Apoptosis;Autophagy;Calcium;Cell membrane;Chemotaxis;Complete proteome;Cytoplasm;Cytoskeleton;Direct protein sequencing;Immunity;Inflammatory response;Innate immunity;Iron;Iron-sulfur;Membrane;Metal-binding;Methylation;Phosphoprotein;Polymorphism;Reference proteome;Repeat;S-nitrosylation;Secreted;Zinc;	;	;K21128;	Unknown SUPERKINGDOM	Unknown KINGDOM	Unknown PHYLUM	Unknown CLASS	Unknown ORDER	Unknown FAMILY	Unknown GENUS	Unknown SPECIES	Unknown SUBSPECIES	8	23	20	7	27	19	24	7	50	28	2	34	7	14	4	5	2	4	2	23	90	26	11	84	55	5	80	76	110	12	195	15	1029	5	14	30
Meta-Protein 253	BLAST_PGK_CLOBA Phosphoglycerate kinase OS=Clostridium botulinum (strain Alaska E43 / Type E3) GN=pgk PE=3 SV=1_B2UY23	3D-structure;ATP-binding;Acetylation;Alternative splicing;Calmodulin-binding;Cell wall;Cell wall biogenesis/degradation;Complete proteome;Cytoplasm;Direct protein sequencing;Disease mutation;Glycolysis;Hereditary hemolytic anemia;Isopeptide bond;Kinase;Nucleotide-binding;Phosphoprotein;Polymorphism;Reference proteome;Secreted;Transferase;Ubl conjugation;	2.7.2.3;	;K00927;	Unknown SUPERKINGDOM	Unknown KINGDOM	Unknown PHYLUM	Unknown CLASS	Unknown ORDER	Unknown FAMILY	Unknown GENUS	Unknown SPECIES	Unknown SUBSPECIES	63	62	60	10	26	81	91	95	277	76	5	122	46	27	12	26	27	7	10	48	51	48	7	17	35	201	20	52	4	111	54	15	55	255	27	5
Meta-Protein 24	BLAST_THLA_CLOAB Acetyl-CoA acetyltransferase OS=Clostridium acetobutylicum (strain ATCC 824 / DSM 792 / JCM 1419 / LMG 5710 / VKM B-1787) GN=thlA PE=1 SV=1_P45359	3D-structure;Acyltransferase;Complete proteome;Cytoplasm;Direct protein sequencing;Fatty acid metabolism;Lipid metabolism;PHA biosynthesis;PHB biosynthesis;Reference proteome;Transferase;	2.3.1.9;	;K00626;	Unknown SUPERKINGDOM	Unknown KINGDOM	Unknown PHYLUM	Unknown CLASS	Unknown ORDER	Unknown FAMILY	Unknown GENUS	Unknown SPECIES	Unknown SUBSPECIES	50	124	73	28	123	150	144	199	264	132	12	101	95	81	17	34	49	37	26	65	0	68	7	46	8	108	31	0	0	25	0	75	36	111	41	0
Meta-Protein 204	ILVC_CLOBB Ketol-acid reductoisomerase (NADP(+)) OS=Clostridium botulinum (strain Eklund 17B / Type B) GN=ilvC PE=3 SV=1	3D-structure;Amino-acid biosynthesis;Branched-chain amino acid biosynthesis;Complete proteome;Direct protein sequencing;Magnesium;Metal-binding;NAD;NADP;Nucleotide-binding;Oxidoreductase;Reference proteome;	1.1.1.383;1.1.1.86;	;K00053;	Unknown SUPERKINGDOM	Unknown KINGDOM	Unknown PHYLUM	Unknown CLASS	Unknown ORDER	Unknown FAMILY	Unknown GENUS	Unknown SPECIES	Unknown SUBSPECIES	77	77	52	23	79	104	103	174	130	129	22	103	39	123	32	84	63	29	26	77	1	19	33	20	37	106	22	2	1	65	3	48	39	145	48	3
Meta-Protein 229	BLAST_UGPC3_RHIEC sn-glycerol-3-phosphate import ATP-binding protein UgpC 3 OS=Rhizobium etli (strain CFN 42 / ATCC 51251) GN=ugpC3 PE=3 SV=1_Q2K1C8	3D-structure;ATP-binding;Cell inner membrane;Cell membrane;Complete proteome;Hydrolase;Magnesium;Membrane;Metal-binding;Nucleotide-binding;Plasmid;Polysaccharide transport;Reference proteome;Stress response;Sugar transport;Sulfate transport;Transport;	;3.6.3.-;3.6.3.19;3.6.3.20;3.6.3.25;3.6.3.31;	;K02045;K05816;K10111;K10112;K10235;K11072;	Unknown SUPERKINGDOM	Unknown KINGDOM	Unknown PHYLUM	Unknown CLASS	Unknown ORDER	Unknown FAMILY	Unknown GENUS	Unknown SPECIES	Unknown SUBSPECIES	94	90	51	25	73	94	119	191	179	89	15	117	76	102	17	85	133	24	27	57	1	27	27	7	26	128	25	6	9	27	20	35	35	131	60	20
Meta-Protein 150	BLAST_THLA_SYNWW Acetyl-CoA acetyltransferase OS=Syntrophomonas wolfei subsp. wolfei (strain DSM 2245B / Goettingen) GN=Swol_1934 PE=1 SV=1_Q0AVM3	3D-structure;Acyltransferase;Complete proteome;Cytoplasm;Direct protein sequencing;Fatty acid metabolism;Lipid metabolism;PHA biosynthesis;PHB biosynthesis;Reference proteome;Transferase;	2.3.1.9;	;K00626;	Unknown SUPERKINGDOM	Unknown KINGDOM	Unknown PHYLUM	Unknown CLASS	Unknown ORDER	Unknown FAMILY	Unknown GENUS	Unknown SPECIES	Unknown SUBSPECIES	45	113	77	41	71	74	129	184	246	128	11	115	90	113	18	19	23	18	19	107	0	19	10	26	0	136	37	0	0	30	0	37	74	61	34	0
Meta-Protein 78	BLAST_ITLN2_HUMAN Intelectin-2 OS=Homo sapiens GN=ITLN2 PE=2 SV=1_Q8WWU7	3D-structure;Alternative splicing;Calcium;Cell membrane;Complete proteome;Direct protein sequencing;Disulfide bond;GPI-anchor;Glycoprotein;Lectin;Lipoprotein;Membrane;Metal-binding;Polymorphism;Reference proteome;Secreted;Signal;	;	;K17527;	Eukaryota	Metazoa	Chordata	Mammalia	Unknown ORDER	Unknown FAMILY	Unknown GENUS	Unknown SPECIES	Unknown SUBSPECIES	93	51	11	19	23	49	50	27	34	31	7	47	26	14	27	21	23	17	24	11	50	52	45	152	108	35	62	102	109	44	19	81	99	38	24	24
Meta-Protein 75	BLAST_MUCAP_PIG Apomucin (Fragment) OS=Sus scrofa PE=1 SV=2_P12021	3D-structure;Autocatalytic cleavage;Blood coagulation;Calcium;Cell adhesion;Cell membrane;Complete proteome;Direct protein sequencing;Disulfide bond;Glycoprotein;Hemostasis;Leucine-rich repeat;Membrane;Metal-binding;Phosphoprotein;Polymorphism;Reference proteome;Repeat;Secreted;Signal;Sulfation;Transmembrane;Transmembrane helix;	;	;K06261;K13908;	Unknown SUPERKINGDOM	Unknown KINGDOM	Unknown PHYLUM	Unknown CLASS	Unknown ORDER	Unknown FAMILY	Unknown GENUS	Unknown SPECIES	Unknown SUBSPECIES	48	10	21	9	32	49	65	39	55	57	12	43	10	17	1	8	7	9	6	35	23	85	58	183	193	48	54	95	30	62	19	25	47	55	14	8
Meta-Protein 176	ENPP7_RAT Ectonucleotide pyrophosphatase/phosphodiesterase family member 7 OS=Rattus norvegicus GN=Enpp7 PE=1 SV=1	3D-structure;Alternative splicing;Blood coagulation;Cell membrane;Complete proteome;Direct protein sequencing;Disulfide bond;Glycoprotein;Hemostasis;Hydrolase;Membrane;Metal-binding;Polymorphism;Reference proteome;Signal;Transmembrane;Transmembrane helix;Zinc;	3.1.4.12;3.6.1.29;	K12354;K18424;	Eukaryota	Metazoa	Chordata	Mammalia	Unknown ORDER	Unknown FAMILY	Unknown GENUS	Unknown SPECIES	Unknown SUBSPECIES	47	27	34	22	50	84	55	50	75	54	24	58	32	64	13	37	42	26	28	21	57	71	52	76	55	73	42	91	78	65	88	61	31	0	47	48
Meta-Protein 17196	Metagenome unknown				Unknown SUPERKINGDOM	Unknown KINGDOM	Unknown PHYLUM	Unknown CLASS	Unknown ORDER	Unknown FAMILY	Unknown GENUS	Unknown SPECIES	Unknown SUBSPECIES	44	22	16	27	53	15	25	16	13	12	10	17	20	17	3	3	14	4	1	34	89	9	65	69	58	45	70	92	79	84	15	58	66	19	61	86
Meta-Protein 238	BLAST_ALF_BACSU Probable fructose-bisphosphate aldolase OS=Bacillus subtilis (strain 168) GN=fbaA PE=1 SV=2_P13243	3D-structure;Complete proteome;Direct protein sequencing;Galactitol metabolism;Glycolysis;Lyase;Metal-binding;Phosphoprotein;Reference proteome;Sporulation;Zinc;	4.1.2.13;4.1.2.29;4.1.2.40;	;K01624;K03339;K08302;	Unknown SUPERKINGDOM	Unknown KINGDOM	Unknown PHYLUM	Unknown CLASS	Unknown ORDER	Unknown FAMILY	Unknown GENUS	Unknown SPECIES	Unknown SUBSPECIES	28	53	40	14	9	68	63	71	201	67	10	110	38	42	10	22	31	13	15	35	4	31	21	18	26	164	17	4	0	63	24	24	31	170	32	7
Meta-Protein 183	FTHS_PEPD6 Formate--tetrahydrofolate ligase OS=Peptoclostridium difficile (strain 630) GN=fhs PE=3 SV=1	4Fe-4S;ATP-binding;Activator;Carboxypeptidase;Cell projection;Chloroplast;Complete proteome;Cytoplasm;DNA damage;DNA repair;DNA replication;DNA-binding;Direct protein sequencing;Heme;Hydrolase;Iron;Iron-sulfur;Ligase;Magnesium;Manganese;Metal-binding;NAD;Nodulation;Nucleotide-binding;One-carbon metabolism;Oxidoreductase;Phosphoprotein;Plastid;Protease;Reference proteome;Repeat;Repressor;Serine pr…	;1.8.7.1;3.4.16.-;6.3.4.3;6.5.1.2;	;K01938;K01972;	Unknown SUPERKINGDOM	Unknown KINGDOM	Unknown PHYLUM	Unknown CLASS	Unknown ORDER	Unknown FAMILY	Unknown GENUS	Unknown SPECIES	Unknown SUBSPECIES	280	46	16	21	49	58	97	156	48	90	15	87	32	67	36	70	18	33	23	15	1	5	37	0	54	54	9	1	1	143	79	21	114	92	25	0
Meta-Protein 5	MYSS_RABIT Myosin heavy chain, skeletal muscle (Fragments) OS=Oryctolagus cuniculus PE=1 SV=2	3D-structure;ATP-binding;Acetylation;Actin-binding;Alternative splicing;Atrial septal defect;Calmodulin-binding;Cardiomyopathy;Cell inner membrane;Cell membrane;Cell shape;Cell wall biogenesis/degradation;Coiled coil;Complete proteome;Cytoplasm;Direct protein sequencing;Disease mutation;Isomerase;Membrane;Methylation;Motor protein;Muscle protein;Myosin;Nucleotide-binding;Peptidoglycan synthesis;P…	;5.1.1.3;	;K01776;K03808;K10352;K17751;	Unknown SUPERKINGDOM	Unknown KINGDOM	Unknown PHYLUM	Unknown CLASS	Unknown ORDER	Unknown FAMILY	Unknown GENUS	Unknown SPECIES	Unknown SUBSPECIES	3	28	0	26	0	12	84	0	89	0	0	23	1	34	2	2	4	0	0	37	0	39	0	1	0	81	44	129	33	81	44	3	4	45	2	1
Meta-Protein 212	Metagenome unknown				Unknown SUPERKINGDOM	Unknown KINGDOM	Unknown PHYLUM	Unknown CLASS	Unknown ORDER	Unknown FAMILY	Unknown GENUS	Unknown SPECIES	Unknown SUBSPECIES	24	66	24	8	28	69	77	81	70	77	22	74	7	107	22	37	85	40	27	32	5	94	30	18	58	63	14	3	26	18	13	23	44	96	17	43
Meta-Protein 127	ALBU_PONAB Serum albumin OS=Pongo abelii GN=ALB PE=2 SV=2	3D-structure;Allergen;Alternative splicing;Cleavage on pair of basic residues;Complete proteome;Copper;Direct protein sequencing;Disease mutation;Disulfide bond;Glycation;Glycoprotein;Lipid-binding;Metal-binding;Methylation;Phosphoprotein;Polymorphism;Reference proteome;Repeat;Secreted;Signal;Zinc;	;	;K16141;	Eukaryota	Metazoa	Chordata	Mammalia	Unknown ORDER	Unknown FAMILY	Unknown GENUS	Unknown SPECIES	Unknown SUBSPECIES	2	11	0	0	9	31	93	0	76	7	0	0	0	0	0	6	9	3	4	391	4	83	1	1287	19	1	1	22	0	19	314	0	37	0	0	2
Meta-Protein 431	BLAST_LV144_HUMAN Immunoglobulin lambda variable 1-44 OS=Homo sapiens GN=IGLV1-44 PE=1 SV=2_P01699	3D-structure;Adaptive immunity;Alternative splicing;Bence-Jones protein;Cell membrane;Complete proteome;Direct protein sequencing;Disulfide bond;Glycoprotein;Immunity;Immunoglobulin C region;Immunoglobulin V region;Immunoglobulin domain;Membrane;Polymorphism;Pyrrolidone carboxylic acid;Reference proteome;Secreted;Signal;	;	;	Unknown SUPERKINGDOM	Unknown KINGDOM	Unknown PHYLUM	Unknown CLASS	Unknown ORDER	Unknown FAMILY	Unknown GENUS	Unknown SPECIES	Unknown SUBSPECIES	26	5	0	9	0	43	60	9	31	10	3	10	6	10	19	9	0	12	0	4	114	7	27	105	101	12	44	90	83	31	90	36	160	54	16	83
Meta-Protein 294	BLAST_ACDB_METTH Acetyl-CoA decarbonylase/synthase complex subunit beta OS=Methanothermobacter thermautotrophicus (strain ATCC 29096 / DSM 1053 / JCM 10044 / NBRC 100330 / Delta H) GN=cdhC PE=3 SV=1_O27745	3D-structure;4Fe-4S;Acyltransferase;Carbon dioxide fixation;Complete proteome;Direct protein sequencing;Iron;Iron-sulfur;Metal-binding;Nickel;Reference proteome;Transferase;	2.3.1.169;	;K00192;K00193;	Unknown SUPERKINGDOM	Unknown KINGDOM	Unknown PHYLUM	Unknown CLASS	Unknown ORDER	Unknown FAMILY	Unknown GENUS	Unknown SPECIES	Unknown SUBSPECIES	116	55	20	16	81	37	27	67	34	58	14	72	35	16	28	28	27	23	20	25	0	13	64	5	19	68	12	20	0	90	44	15	57	130	22	0
Meta-Protein 1045	PERE_MOUSE Eosinophil peroxidase OS=Mus musculus GN=Epx PE=1 SV=2	3D-structure;Alternative splicing;Calcium;Complete proteome;Direct protein sequencing;Disease mutation;Disulfide bond;EGF-like domain;Glycoprotein;Heme;Hydrogen peroxide;Iron;Lysosome;Membrane;Metal-binding;Nitration;Oxidation;Oxidoreductase;Peroxidase;Polymorphism;Reference proteome;Signal;Sushi;Thyroid hormones biosynthesis;Transmembrane;Transmembrane helix;	1.11.1.7;1.11.1.8;1.11.2.2;	K00431;K10788;K10789;	Eukaryota	Metazoa	Chordata	Mammalia	Unknown ORDER	Unknown FAMILY	Unknown GENUS	Unknown SPECIES	Unknown SUBSPECIES	46	4	2	9	41	0	0	0	2	13	0	28	0	0	0	0	0	1	1	0	171	29	0	4	9	0	80	54	153	12	206	0	552	0	19	15
Meta-Protein 151	Metagenome unknown	Alternative splicing;Complete proteome;Developmental protein;Glycoprotein;Glycosyltransferase;Membrane;Polymorphism;Reference proteome;Repeat;TPR repeat;Transferase;Transmembrane;Transmembrane helix;	;2.4.1.255;	;K09667;	Unknown SUPERKINGDOM	Unknown KINGDOM	Unknown PHYLUM	Unknown CLASS	Unknown ORDER	Unknown FAMILY	Unknown GENUS	Unknown SPECIES	Unknown SUBSPECIES	32	45	57	26	20	21	58	41	45	8	11	82	16	42	18	17	18	4	18	39	0	7	110	15	240	24	39	37	128	5	0	32	80	138	23	41
Meta-Protein 35	Metagenome unknown				Unknown SUPERKINGDOM	Unknown KINGDOM	Unknown PHYLUM	Unknown CLASS	Unknown ORDER	Unknown FAMILY	Unknown GENUS	Unknown SPECIES	Unknown SUBSPECIES	92	69	13	16	49	84	110	101	60	86	6	32	19	29	9	17	15	52	8	33	4	128	9	30	0	58	4	15	45	14	10	27	55	52	30	2
Meta-Protein 173	BLAST_RRBR2_CLOAB Reverse rubrerythrin-2 OS=Clostridium acetobutylicum (strain ATCC 824 / DSM 792 / JCM 1419 / LMG 5710 / VKM B-1787) GN=rbr3B PE=1 SV=1_Q97D83	Complete proteome;Detoxification;Direct protein sequencing;Electron transport;Iron;Metal-binding;NAD;Oxidoreductase;Peroxidase;Reference proteome;Stress response;Transport;	1.11.1.1;	;	Unknown SUPERKINGDOM	Unknown KINGDOM	Unknown PHYLUM	Unknown CLASS	Unknown ORDER	Unknown FAMILY	Unknown GENUS	Unknown SPECIES	Unknown SUBSPECIES	16	45	62	37	43	52	65	61	80	42	28	58	44	26	15	19	52	24	25	53	0	27	17	35	27	58	34	10	5	83	1	42	56	68	44	15
Meta-Protein 148	BLAST_OMPC_ECO57 Outer membrane protein C OS=Escherichia coli O157:H7 GN=ompC PE=3 SV=1_Q8XE41	3D-structure;Cell outer membrane;Complete proteome;Direct protein sequencing;Host cell outer membrane;Host membrane;Ion transport;Magnesium;Membrane;Metal-binding;Porin;Reference proteome;Signal;Transmembrane;Transmembrane beta strand;Transport;	;	;K09475;K14062;K16076;	Unknown SUPERKINGDOM	Unknown KINGDOM	Unknown PHYLUM	Unknown CLASS	Unknown ORDER	Unknown FAMILY	Unknown GENUS	Unknown SPECIES	Unknown SUBSPECIES	0	0	0	0	0	0	0	23	0	0	0	0	0	0	0	0	0	0	0	0	96	341	1	0	87	0	1	0	12	163	7	0	1	0	0	303
Meta-Protein 191	BLAST_CDHR2_HUMAN Cadherin-related family member 2 OS=Homo sapiens GN=CDHR2 PE=1 SV=2_Q9BYE9	3D-structure;Calcium;Cell adhesion;Cell junction;Cell membrane;Cell projection;Complete proteome;Differentiation;Glycoprotein;Membrane;Phosphoprotein;Polymorphism;Reference proteome;Repeat;Signal;Transmembrane;Transmembrane helix;	;	K16502;	Eukaryota	Metazoa	Chordata	Mammalia	Unknown ORDER	Unknown FAMILY	Unknown GENUS	Unknown SPECIES	Unknown SUBSPECIES	32	9	18	9	37	29	19	33	23	10	5	17	18	15	0	8	6	8	6	40	5	21	40	29	59	20	61	58	43	83	2	64	29	34	21	16
Meta-Protein 97	BLAST_PFLB_STAAW Formate acetyltransferase OS=Staphylococcus aureus (strain MW2) GN=pflB PE=3 SV=1_Q7A1W9	3D-structure;Acetylation;Acyltransferase;Carbohydrate metabolism;Complete proteome;Cytoplasm;Direct protein sequencing;Glucose metabolism;Organic radical;Reference proteome;Stress response;Transferase;	;2.3.1.-;2.3.1.54;	;K00656;K06866;	Unknown SUPERKINGDOM	Unknown KINGDOM	Unknown PHYLUM	Unknown CLASS	Unknown ORDER	Unknown FAMILY	Unknown GENUS	Unknown SPECIES	Unknown SUBSPECIES	71	77	39	5	80	71	48	164	57	60	1	125	19	29	0	43	37	3	3	22	42	108	17	21	16	99	0	0	0	25	62	3	2	46	65	88
Meta-Protein 340	Metagenome unknown	3D-structure;Cell inner membrane;Cell membrane;Complete proteome;Direct protein sequencing;Membrane;Periplasm;Reference proteome;Signal;Sugar transport;Transmembrane;Transmembrane helix;Transport;	;	;K15770;K17315;	Unknown SUPERKINGDOM	Unknown KINGDOM	Unknown PHYLUM	Unknown CLASS	Unknown ORDER	Unknown FAMILY	Unknown GENUS	Unknown SPECIES	Unknown SUBSPECIES	2	41	18	18	7	75	92	52	95	64	6	31	38	53	8	23	21	3	27	37	0	39	0	72	1	67	9	0	0	0	0	106	10	92	52	0
Meta-Protein 249	BLAST_NADB_RHORU L-aspartate oxidase (Fragment) OS=Rhodospirillum rubrum GN=nadB PE=3 SV=1_Q59767	3D-structure;Cell membrane;Chloroplast;Complete proteome;Cytoplasm;Direct protein sequencing;Electron transport;FAD;FMN;Flavoprotein;GTP-binding;Heme;Hydrolase;Iron;Lipoprotein;Magnesium;Membrane;Metal-binding;Mitochondrion;Mitochondrion inner membrane;NAD;Nucleotide-binding;Nucleus;Oxidoreductase;Palmitate;Periplasm;Phosphoprotein;Plastid;Potassium;Pyridine nucleotide biosynthesis;Reference prot…	1.3.1.6;1.3.5.1;1.3.5.4;1.3.99.33;1.4.3.16;3.6.-.-;	;K00234;K00239;K00244;K00278;K03650;K17363;	Unknown SUPERKINGDOM	Unknown KINGDOM	Unknown PHYLUM	Unknown CLASS	Unknown ORDER	Unknown FAMILY	Unknown GENUS	Unknown SPECIES	Unknown SUBSPECIES	26	26	13	22	53	53	71	13	14	4	0	30	2	51	13	28	14	24	14	13	1	163	44	73	28	23	7	1	49	22	0	7	29	40	41	24
Meta-Protein 131	AACT_HUMAN Alpha-1-antichymotrypsin OS=Homo sapiens GN=SERPINA3 PE=1 SV=2	3D-structure;Acute phase;Adaptive immunity;Alternative splicing;Apoptosis;Complete proteome;Cytoplasm;Direct protein sequencing;Disease mutation;Glycoprotein;Immunity;Nucleus;Polymorphism;Protease inhibitor;Reference proteome;Secreted;Serine protease inhibitor;Signal;Thiol protease inhibitor;	;	;K04525;	Eukaryota	Metazoa	Chordata	Mammalia	Unknown ORDER	Unknown FAMILY	Unknown GENUS	Unknown SPECIES	Unknown SUBSPECIES	50	11	21	13	26	30	33	0	19	16	6	32	12	13	7	12	2	6	13	12	63	19	38	25	53	2	21	45	63	83	56	37	49	0	31	20
Meta-Protein 221	BLAST_IGHM_HUMAN Immunoglobulin heavy constant mu OS=Homo sapiens GN=IGHM PE=1 SV=4_P01871	3D-structure;Adaptive immunity;Alternative splicing;Cell membrane;Complete proteome;Direct protein sequencing;Disulfide bond;Glycoprotein;Immunity;Immunoglobulin C region;Immunoglobulin V region;Immunoglobulin domain;Membrane;Polymorphism;Pyrrolidone carboxylic acid;Reference proteome;Repeat;Secreted;Signal;Transmembrane;	;	;	Unknown SUPERKINGDOM	Unknown KINGDOM	Unknown PHYLUM	Unknown CLASS	Unknown ORDER	Unknown FAMILY	Unknown GENUS	Unknown SPECIES	Unknown SUBSPECIES	33	0	0	0	0	10	13	0	12	29	0	0	0	2	7	2	0	0	1	0	74	0	44	125	204	7	21	58	81	13	196	14	38	53	41	99
Meta-Protein 2	GP2_HUMAN Pancreatic secretory granule membrane major glycoprotein GP2 OS=Homo sapiens GN=GP2 PE=2 SV=3	Acetylation;Alternative splicing;Aminopeptidase;Cell membrane;Complete proteome;Cytoplasm;DNA damage;DNA excision;DNA repair;Direct protein sequencing;Disulfide bond;EGF-like domain;Excision nuclease;GPI-anchor;Glycoprotein;Hydrolase;Lipoprotein;Membrane;Metal-binding;Metalloprotease;Protease;Reference proteome;SOS response;Secreted;Signal;Zinc;	;3.4.14.4;	;K01277;K03703;K19899;	Unknown SUPERKINGDOM	Unknown KINGDOM	Unknown PHYLUM	Unknown CLASS	Unknown ORDER	Unknown FAMILY	Unknown GENUS	Unknown SPECIES	Unknown SUBSPECIES	0	69	20	0	0	47	48	14	4	29	3	16	1	0	4	3	18	30	0	24	8	54	4	3	28	53	0	2	47	0	41	17	0	75	21	12
Meta-Protein 234	DPEP1_HUMAN Dipeptidase 1 OS=Homo sapiens GN=DPEP1 PE=1 SV=3	3D-structure;Cell membrane;Cell projection;Complete proteome;Dipeptidase;Direct protein sequencing;Disulfide bond;GPI-anchor;Glycoprotein;Hydrolase;Lipoprotein;Membrane;Metal-binding;Metalloprotease;Polymorphism;Protease;Reference proteome;Signal;Zinc;	3.4.13.19;	K01273;	Eukaryota	Metazoa	Chordata	Mammalia	Unknown ORDER	Unknown FAMILY	Unknown GENUS	Unknown SPECIES	Unknown SUBSPECIES	8	15	27	18	51	63	63	52	30	27	12	48	11	25	7	12	7	7	4	25	64	43	50	36	11	22	37	33	4	18	69	59	24	25	18	38
Meta-Protein 95	BLAST_ATPBM_MAIZE ATP synthase subunit beta, mitochondrial OS=Zea mays GN=ATPB PE=2 SV=1_P19023	3D-structure;ATP synthesis;ATP-binding;Acetylation;Allergen;Behavior;CF(1);Cell inner membrane;Cell membrane;Cell projection;Chloroplast;Cilium;Complete proteome;Cyanelle;Direct protein sequencing;Glycoprotein;Hydrogen ion transport;Hydrolase;Ion transport;Membrane;Mitochondrion;Mitochondrion inner membrane;Nucleotide-binding;Phosphoprotein;Plastid;Polymorphism;RNA editing;Reference proteome;Sodi…	3.6.3.14;3.6.3.15;	;K02112;K02133;	Unknown SUPERKINGDOM	Unknown KINGDOM	Unknown PHYLUM	Unknown CLASS	Unknown ORDER	Unknown FAMILY	Unknown GENUS	Unknown SPECIES	Unknown SUBSPECIES	1	18	20	6	3	43	62	21	45	5	0	7	7	11	7	8	18	6	10	43	11	100	18	40	4	36	23	53	3	27	14	8	16	39	18	53
Meta-Protein 147	BLAST_ADH1_CLOSA NADPH-dependent butanol dehydrogenase OS=Clostridium saccharobutylicum GN=adh1 PE=3 SV=1_P13604	Antiport;Cell membrane;Complete proteome;Cytoplasm;FMN;Flavoprotein;Heme;Ion transport;Iron;Membrane;Metal-binding;NADP;Nucleus;Oxidoreductase;RNA-binding;Reference proteome;Signalosome;Transmembrane;Transmembrane helix;Transport;tRNA processing;tRNA-binding;	;1.1.1.-;1.11.1.6;1.21.98.2;1.3.1.-;	;K12179;K19885;	Unknown SUPERKINGDOM	Unknown KINGDOM	Unknown PHYLUM	Unknown CLASS	Unknown ORDER	Unknown FAMILY	Unknown GENUS	Unknown SPECIES	Unknown SUBSPECIES	16	12	42	4	16	31	32	109	94	65	4	75	31	24	9	13	19	2	6	23	13	33	7	8	6	85	6	4	17	66	1	1	12	130	1	12
Meta-Protein 331	SPB6_PONAB Serpin B6 OS=Pongo abelii GN=SERPINB6 PE=2 SV=1	Acetylation;Complete proteome;Cytoplasm;Deafness;Direct protein sequencing;Non-syndromic deafness;Phosphoprotein;Polymorphism;Protease inhibitor;Reference proteome;Serine protease inhibitor;	;	K13963;	Eukaryota	Metazoa	Chordata	Mammalia	Primates	Unknown FAMILY	Unknown GENUS	Unknown SPECIES	Unknown SUBSPECIES	29	0	2	6	30	19	36	0	4	5	3	34	15	14	15	21	0	14	14	22	75	56	67	35	20	0	21	43	81	91	26	26	49	0	8	1
Meta-Protein 346	BLAST_TPIS_PEDPA Triosephosphate isomerase OS=Pediococcus pentosaceus (strain ATCC 25745 / CCUG 21536 / LMG 10740 / 183-1w) GN=tpiA PE=3 SV=1_Q03GW6	3D-structure;Complete proteome;Cytoplasm;Direct protein sequencing;Gluconeogenesis;Glycolysis;Isomerase;Pentose shunt;Reference proteome;	5.3.1.1;	;K01803;	Unknown SUPERKINGDOM	Unknown KINGDOM	Unknown PHYLUM	Unknown CLASS	Unknown ORDER	Unknown FAMILY	Unknown GENUS	Unknown SPECIES	Unknown SUBSPECIES	27	37	28	24	13	27	34	40	101	39	10	75	14	20	21	18	21	7	4	28	0	5	23	7	24	93	26	20	7	45	1	26	32	41	26	0
Meta-Protein 17195	SCONB_ARTOC Probable E3 ubiquitin ligase complex SCF subunit sconB OS=Arthroderma otae (strain ATCC MYA-4605 / CBS 113480) GN=sconB PE=3 SV=1	Complete proteome;Reference proteome;Repeat;Transcription;Transcription regulation;Ubl conjugation pathway;WD repeat;	;	;	Eukaryota	Fungi	Ascomycota	Eurotiomycetes	Onygenales	Arthrodermataceae	Arthroderma	Arthroderma otae	Arthroderma otae CBS 113480	13	12	7	12	27	7	7	6	7	4	3	6	8	4	0	1	3	1	0	20	53	4	38	25	37	27	40	65	57	59	7	28	35	9	54	50
Meta-Protein 187	BLAST_PNP_SULAA Polyribonucleotide nucleotidyltransferase OS=Sulfurihydrogenibium azorense (strain Az-Fu1 / DSM 15241 / OCM 825) GN=pnp PE=3 SV=1_C1DTW6	3D-structure;4Fe-4S;Coiled coil;Complete proteome;Cytoplasm;Direct protein sequencing;Iron;Iron-sulfur;Isoprene biosynthesis;Magnesium;Metal-binding;Nucleotidyltransferase;Oxidoreductase;Phosphoprotein;RNA-binding;Reference proteome;Repeat;Ribonucleoprotein;Ribosomal protein;Transferase;	;1.17.7.4;2.7.7.8;	K00962;K02945;K03527;K06959;	Unknown SUPERKINGDOM	Unknown KINGDOM	Unknown PHYLUM	Unknown CLASS	Unknown ORDER	Unknown FAMILY	Unknown GENUS	Unknown SPECIES	Unknown SUBSPECIES	16	37	22	16	11	20	45	17	86	22	8	46	18	22	6	5	7	2	1	18	0	0	28	9	14	57	25	4	2	50	0	17	35	82	23	0
Meta-Protein 458	BLAST_FUCI_BACFR L-fucose isomerase OS=Bacteroides fragilis (strain YCH46) GN=fucI PE=3 SV=1_Q64ZS4	3D-structure;Carbohydrate metabolism;Complete proteome;Cytoplasm;Fucose metabolism;Isomerase;Manganese;Metal-binding;Reference proteome;	5.3.1.25;	K01818;	Unknown SUPERKINGDOM	Unknown KINGDOM	Unknown PHYLUM	Unknown CLASS	Unknown ORDER	Unknown FAMILY	Unknown GENUS	Unknown SPECIES	Unknown SUBSPECIES	75	31	3	6	16	19	46	30	7	37	11	35	10	21	2	11	19	12	12	10	0	9	26	1	42	43	5	36	11	123	0	27	15	32	10	38
Meta-Protein 209	CH60_KLEAK 60 kDa chaperonin OS=Klebsiella aerogenes (strain ATCC 13048 / DSM 30053 / JCM 1235 / KCTC 2190 / NBRC 13534 / NCIMB 10102 / NCTC 10006) GN=groL PE=3 SV=2	3D-structure;ATP-binding;Acetylation;Alternative splicing;Cell cycle;Cell division;Chaperone;Chloroplast;Coiled coil;Complete proteome;Cytoplasm;Direct protein sequencing;Nucleotide-binding;Phosphoprotein;Plastid;Reference proteome;Stress response;Transit peptide;	;	;K04077;	Unknown SUPERKINGDOM	Unknown KINGDOM	Unknown PHYLUM	Unknown CLASS	Unknown ORDER	Unknown FAMILY	Unknown GENUS	Unknown SPECIES	Unknown SUBSPECIES	3	26	19	2	1	28	24	27	80	11	0	16	32	0	0	1	0	0	5	13	10	116	0	21	58	51	9	1	0	63	39	22	27	29	3	132
Meta-Protein 277	ZG16_HUMAN Zymogen granule membrane protein 16 OS=Homo sapiens GN=ZG16 PE=1 SV=2	3D-structure;Complete proteome;Cytoplasmic vesicle;Direct protein sequencing;Extracellular matrix;Golgi apparatus;Lectin;Polymorphism;Protein transport;Reference proteome;Secreted;Signal;Transport;	;	;	Eukaryota	Metazoa	Chordata	Mammalia	Unknown ORDER	Unknown FAMILY	Unknown GENUS	Unknown SPECIES	Unknown SUBSPECIES	29	13	16	2	31	15	23	12	1	10	0	10	2	1	1	1	8	11	4	25	12	29	28	89	53	25	18	5	21	47	4	10	16	51	25	23
Meta-Protein 132	BLAST_PFP_SPITD Pyrophosphate--fructose 6-phosphate 1-phosphotransferase OS=Spirochaeta thermophila (strain ATCC 49972 / DSM 6192 / RI 19.B1) GN=pfp PE=1 SV=1_Q9EZ02	Complete proteome;Cytoplasm;Direct protein sequencing;Glycolysis;Kinase;Magnesium;Metal-binding;Reference proteome;Transferase;	2.7.1.90;	;K00895;	Unknown SUPERKINGDOM	Unknown KINGDOM	Unknown PHYLUM	Unknown CLASS	Unknown ORDER	Unknown FAMILY	Unknown GENUS	Unknown SPECIES	Unknown SUBSPECIES	1	7	36	0	7	111	121	3	9	5	0	24	1	3	1	1	2	35	0	13	0	184	20	46	10	19	3	0	0	3	0	0	10	44	30	0
Meta-Protein 186	11S2_SESIN 11S globulin seed storage protein 2 OS=Sesamum indicum PE=2 SV=1	ATP-binding;Amino-acid biosynthesis;Aminoacyl-tRNA synthetase;Aromatic amino acid biosynthesis;Complete proteome;Cytoplasm;Disulfide bond;Kinase;Ligase;Magnesium;Metal-binding;Nucleotide-binding;Protein biosynthesis;Reference proteome;Seed storage protein;Signal;Storage protein;Transferase;	;2.7.1.71;6.1.1.18;	;K00891;K01886;	Unknown SUPERKINGDOM	Unknown KINGDOM	Unknown PHYLUM	Unknown CLASS	Unknown ORDER	Unknown FAMILY	Unknown GENUS	Unknown SPECIES	Unknown SUBSPECIES	0	45	0	0	58	0	0	8	0	0	0	0	0	349	0	2	8	0	0	13	0	4	0	83	0	2	0	0	0	0	1	194	0	0	0	0
Meta-Protein 443	BLAST_RL7_LACP7 50S ribosomal protein L7/L12 OS=Lachnoclostridium phytofermentans (strain ATCC 700394 / DSM 18823 / ISDg) GN=rplL PE=3 SV=1_A9KJL7	Complete proteome;Reference proteome;Ribonucleoprotein;Ribosomal protein;	;	K02935;	Unknown SUPERKINGDOM	Unknown KINGDOM	Unknown PHYLUM	Unknown CLASS	Unknown ORDER	Unknown FAMILY	Unknown GENUS	Unknown SPECIES	Unknown SUBSPECIES	8	16	31	7	7	16	16	21	53	18	15	37	13	13	3	13	4	4	2	19	0	6	19	13	7	55	24	12	3	62	0	9	14	67	18	0
Meta-Protein 424	BLAST_MEP1A_HUMAN Meprin A subunit alpha OS=Homo sapiens GN=MEP1A PE=1 SV=2_Q16819	Complete proteome;Disulfide bond;EGF-like domain;Glycoprotein;Hydrolase;Membrane;Metal-binding;Metalloprotease;Polymorphism;Protease;Reference proteome;Signal;Transmembrane;Transmembrane helix;Zinc;Zymogen;	3.4.24.18;	K01395;	Eukaryota	Metazoa	Chordata	Mammalia	Primates	Hominidae	Homo	Homo sapiens	Unknown SUBSPECIES	6	0	13	0	25	27	18	21	1	50	5	15	9	12	1	2	36	5	0	33	1	16	33	36	28	43	0	7	0	2	54	71	0	0	26	8
Meta-Protein 263	S10A8_HUMAN Protein S100-A8 OS=Homo sapiens GN=S100A8 PE=1 SV=1	3D-structure;Antimicrobial;Apoptosis;Autophagy;Calcium;Cell membrane;Chemotaxis;Complete proteome;Cytoplasm;Cytoskeleton;Direct protein sequencing;Immunity;Inflammatory response;Innate immunity;Membrane;Metal-binding;Reference proteome;Repeat;S-nitrosylation;Secreted;Zinc;	;	K21127;	Eukaryota	Metazoa	Chordata	Mammalia	Primates	Hominidae	Homo	Homo sapiens	Unknown SUBSPECIES	5	3	1	0	8	4	2	1	12	6	0	12	0	4	0	1	0	0	0	7	20	5	0	48	26	3	5	13	30	0	208	0	140	0	0	6
Meta-Protein 218	BLAST_CEAM5_HUMAN Carcinoembryonic antigen-related cell adhesion molecule 5 OS=Homo sapiens GN=CEACAM5 PE=1 SV=3_P06731	3D-structure;Alternative splicing;Cell junction;Cell membrane;Cell projection;Complete proteome;Cytoplasmic vesicle;Direct protein sequencing;Disulfide bond;GPI-anchor;Glycoprotein;Immunoglobulin domain;Lipoprotein;Membrane;Phosphoprotein;Polymorphism;Pyrrolidone carboxylic acid;Reference proteome;Repeat;Secreted;Signal;Transmembrane;Transmembrane helix;	;	K06499;	Unknown SUPERKINGDOM	Unknown KINGDOM	Unknown PHYLUM	Unknown CLASS	Unknown ORDER	Unknown FAMILY	Unknown GENUS	Unknown SPECIES	Unknown SUBSPECIES	19	18	8	24	27	10	42	16	39	4	12	9	5	11	3	16	5	14	14	32	1	0	27	23	67	16	17	18	16	17	10	18	43	16	22	0
Meta-Protein 208	BLAST_ASAH2_HUMAN Neutral ceramidase OS=Homo sapiens GN=ASAH2 PE=1 SV=2_Q9NR71	3D-structure;Alternative splicing;Apoptosis;Cell membrane;Complete proteome;Direct protein sequencing;Glycoprotein;Hydrolase;Lipid metabolism;Membrane;Phosphoprotein;Polymorphism;Reference proteome;Signal-anchor;Sphingolipid metabolism;Transmembrane;Transmembrane helix;Ubl conjugation;	;3.5.1.23;	;K12349;	Eukaryota	Metazoa	Chordata	Mammalia	Unknown ORDER	Unknown FAMILY	Unknown GENUS	Unknown SPECIES	Unknown SUBSPECIES	67	29	13	9	74	46	42	44	13	20	2	33	13	12	15	29	22	21	13	6	52	30	21	31	39	9	17	37	25	7	18	16	13	10	17	14
Meta-Protein 207	BLAST_ACSE_MOOTH 5-methyltetrahydrofolate:corrinoid/iron-sulfur protein co-methyltransferase OS=Moorella thermoacetica GN=acsE PE=1 SV=2_Q46389	3D-structure;Calcium;Carbon dioxide fixation;Cobalamin;Cobalt;Metal-binding;Methyltransferase;Transferase;	2.1.1.258;	;	Unknown SUPERKINGDOM	Unknown KINGDOM	Unknown PHYLUM	Unknown CLASS	Unknown ORDER	Unknown FAMILY	Unknown GENUS	Unknown SPECIES	Unknown SUBSPECIES	32	24	17	17	5	37	56	25	57	30	5	61	12	13	2	3	10	2	1	8	0	3	27	13	16	51	11	16	0	39	0	26	12	83	9	0
Meta-Protein 236	Metagenome unknown				Unknown SUPERKINGDOM	Unknown KINGDOM	Unknown PHYLUM	Unknown CLASS	Unknown ORDER	Unknown FAMILY	Unknown GENUS	Unknown SPECIES	Unknown SUBSPECIES	0	19	0	51	28	32	11	0	163	75	8	78	69	39	0	7	9	19	4	46	0	14	0	11	0	20	39	0	0	31	0	0	0	0	0	0
Meta-Protein 461	BLAST_CRT_CLODI Short-chain-enoyl-CoA hydratase (Fragment) OS=Clostridioides difficile GN=crt PE=3 SV=1_P45361	Complete proteome;Cytoplasm;Direct protein sequencing;Fatty acid metabolism;Lipid degradation;Lipid metabolism;Lyase;Reference proteome;	4.2.1.150;4.2.1.17;	;K01715;K13767;	Unknown SUPERKINGDOM	Unknown KINGDOM	Unknown PHYLUM	Unknown CLASS	Unknown ORDER	Unknown FAMILY	Unknown GENUS	Unknown SPECIES	Unknown SUBSPECIES	11	49	37	11	11	58	61	52	77	27	0	46	28	14	2	10	35	7	8	20	0	20	20	16	0	73	4	0	0	6	0	15	15	56	17	0
Meta-Protein 290	BLAST_CUZD1_HUMAN CUB and zona pellucida-like domain-containing protein 1 OS=Homo sapiens GN=CUZD1 PE=2 SV=1_Q86UP6	Alternative splicing;Cell adhesion;Cell cycle;Cell division;Complete proteome;Cytoplasmic vesicle;Disulfide bond;Glycoprotein;Membrane;Polymorphism;Reference proteome;Repeat;Signal;Transmembrane;Transmembrane helix;	;	;	Eukaryota	Metazoa	Chordata	Mammalia	Unknown ORDER	Unknown FAMILY	Unknown GENUS	Unknown SPECIES	Unknown SUBSPECIES	34	41	19	12	30	33	23	26	9	10	10	12	13	24	2	15	13	6	5	11	37	27	20	5	30	7	25	37	48	13	28	51	6	42	28	19
Meta-Protein 264	RS3_AGARV 30S ribosomal protein S3 OS=Agathobacter rectalis (strain ATCC 33656 / DSM 3377 / JCM 17463 / KCTC 5835 / VPI 0990) GN=rpsC PE=3 SV=1	3D-structure;Complete proteome;RNA-binding;Reference proteome;Ribonucleoprotein;Ribosomal protein;rRNA-binding;	;	;K02982;	Unknown SUPERKINGDOM	Unknown KINGDOM	Unknown PHYLUM	Unknown CLASS	Unknown ORDER	Unknown FAMILY	Unknown GENUS	Unknown SPECIES	Unknown SUBSPECIES	56	42	14	10	24	33	41	40	50	37	7	38	16	57	9	26	46	15	29	11	6	10	24	1	17	39	8	27	6	16	13	32	25	34	26	6
Meta-Protein 444	BLAST_ADHE_ECOLI Aldehyde-alcohol dehydrogenase OS=Escherichia coli (strain K12) GN=adhE PE=1 SV=2_P0A9Q7	3D-structure;Acetylation;Complete proteome;Direct protein sequencing;Iron;Multifunctional enzyme;NAD;Oxidoreductase;Plasmid;Reference proteome;	1.1.1.1;1.2.1.10;1.2.1.3;	;K04072;K13954;	Unknown SUPERKINGDOM	Unknown KINGDOM	Unknown PHYLUM	Unknown CLASS	Unknown ORDER	Unknown FAMILY	Unknown GENUS	Unknown SPECIES	Unknown SUBSPECIES	46	10	8	3	23	13	32	35	13	14	3	16	12	15	2	3	8	4	21	4	5	202	0	6	9	31	1	13	7	68	6	0	0	38	5	136
Meta-Protein 1268	PHSA_PHAVU Phaseolin, alpha-type OS=Phaseolus vulgaris PE=1 SV=1	3D-structure;Direct protein sequencing;Glycoprotein;Seed storage protein;Signal;Storage protein;Vacuole;	;	;	Eukaryota	Viridiplantae	Streptophyta	Unknown CLASS	Fabales	Fabaceae	Phaseolus	Unknown SPECIES	Unknown SUBSPECIES	0	0	5	0	0	0	0	0	0	0	0	0	0	0	0	0	0	0	0	0	0	0	0	0	0	0	0	0	0	0	0	0	0	110	0	0
Meta-Protein 636	BLAST_COOS1_METAC Carbon monoxide dehydrogenase 1 OS=Methanosarcina acetivorans (strain ATCC 35395 / DSM 2834 / JCM 12185 / C2A) GN=cooS1 PE=3 SV=1_Q8TKW2	4Fe-4S;Complete proteome;Iron;Iron-sulfur;Metal-binding;Nickel;Oxidoreductase;Reference proteome;	1.2.7.4;	K00198;	Unknown SUPERKINGDOM	Unknown KINGDOM	Unknown PHYLUM	Unknown CLASS	Unknown ORDER	Unknown FAMILY	Unknown GENUS	Unknown SPECIES	Unknown SUBSPECIES	106	40	6	10	44	22	40	24	41	34	9	74	11	35	20	24	19	10	16	5	0	4	25	0	15	51	0	5	1	62	0	7	29	67	12	0
Meta-Protein 166	ACT23_DICDI Putative actin-23 OS=Dictyostelium discoideum GN=act23 PE=1 SV=1	3D-structure;ADP-ribosylation;ANK repeat;ATP-binding;Acetylation;Allergen;Alternative splicing;Aortic aneurysm;Atrial septal defect;Cardiomyopathy;Coiled coil;Complete proteome;Cytoplasm;Cytoskeleton;Deafness;Direct protein sequencing;Disease mutation;Dystonia;Isopeptide bond;Kinase;Mental retardation;Methylation;Muscle protein;Nemaline myopathy;Non-syndromic deafness;Nucleotide-binding;Oncogene;…	;2.7.10.2;	;K05692;K10354;K10355;K12313;K12314;K12315;K17299;	Unknown SUPERKINGDOM	Unknown KINGDOM	Unknown PHYLUM	Unknown CLASS	Unknown ORDER	Unknown FAMILY	Unknown GENUS	Unknown SPECIES	Unknown SUBSPECIES	25	11	2	2	0	19	24	6	43	4	3	7	0	15	1	0	6	4	2	2	8	22	11	100	21	31	16	47	7	14	48	2	10	13	5	1
Meta-Protein 196	Metagenome unknown				Unknown SUPERKINGDOM	Unknown KINGDOM	Unknown PHYLUM	Unknown CLASS	Unknown ORDER	Unknown FAMILY	Unknown GENUS	Unknown SPECIES	Unknown SUBSPECIES	0	13	116	0	33	85	33	234	182	14	1	96	48	13	0	11	38	20	2	4	0	44	13	27	0	16	0	0	0	35	0	3	0	48	14	0
Meta-Protein 463	BLAST_TPIS_BACTN Triosephosphate isomerase OS=Bacteroides thetaiotaomicron (strain ATCC 29148 / DSM 2079 / NCTC 10582 / E50 / VPI-5482) GN=tpiA PE=3 SV=1_Q8A0U2	Complete proteome;Cytoplasm;DNA replication;DNA-binding;Gluconeogenesis;Glycolysis;Host nucleus;Isomerase;Pentose shunt;Phosphoprotein;Reference proteome;	;5.3.1.1;	;K01803;	Unknown SUPERKINGDOM	Unknown KINGDOM	Unknown PHYLUM	Unknown CLASS	Unknown ORDER	Unknown FAMILY	Unknown GENUS	Unknown SPECIES	Unknown SUBSPECIES	5	8	35	5	0	1	11	9	23	1	1	36	1	6	6	6	3	0	8	20	0	1	34	13	73	34	29	36	46	54	3	7	33	65	3	23
Meta-Protein 413	BLAST_LACE_RHIRD Lactose-binding protein OS=Rhizobium radiobacter GN=lacE PE=1 SV=1_P29822	Direct protein sequencing;Periplasm;Signal;Sugar transport;Transport;	;	;	Unknown SUPERKINGDOM	Unknown KINGDOM	Unknown PHYLUM	Unknown CLASS	Unknown ORDER	Unknown FAMILY	Unknown GENUS	Unknown SPECIES	Unknown SUBSPECIES	23	24	31	25	14	11	28	14	61	3	3	54	28	1	2	14	10	5	2	12	0	1	16	0	15	62	4	0	0	71	0	30	6	105	10	0
Meta-Protein 260	BLAST_MDH_BACTN Malate dehydrogenase OS=Bacteroides thetaiotaomicron (strain ATCC 29148 / DSM 2079 / NCTC 10582 / E50 / VPI-5482) GN=mdh PE=3 SV=1_Q8A0W0	Complete proteome;Direct protein sequencing;NAD;Oxidoreductase;Reference proteome;Tricarboxylic acid cycle;	1.1.1.37;	;K00024;	Unknown SUPERKINGDOM	Unknown KINGDOM	Unknown PHYLUM	Unknown CLASS	Unknown ORDER	Unknown FAMILY	Unknown GENUS	Unknown SPECIES	Unknown SUBSPECIES	8	12	7	0	2	2	9	22	37	4	3	39	5	0	7	10	6	0	6	15	0	0	49	10	97	32	20	20	53	43	0	16	79	72	9	7
Meta-Protein 377	BLAST_PA21B_HUMAN Phospholipase A2 OS=Homo sapiens GN=PLA2G1B PE=1 SV=3_P04054	3D-structure;Autocatalytic cleavage;Calcium;Complete proteome;Direct protein sequencing;Disulfide bond;Hydrolase;Lipid degradation;Lipid metabolism;Lipoprotein;Metal-binding;Palmitate;Polymorphism;Pyrrolidone carboxylic acid;Reference proteome;Secreted;Signal;Zymogen;	3.1.1.4;	;K01047;	Eukaryota	Metazoa	Chordata	Mammalia	Unknown ORDER	Unknown FAMILY	Unknown GENUS	Unknown SPECIES	Unknown SUBSPECIES	16	54	17	20	19	21	28	18	34	16	6	21	24	17	13	17	21	9	12	7	52	4	11	16	24	26	4	14	19	20	19	22	55	17	16	4
Meta-Protein 1360	CEL2A_MOUSE Chymotrypsin-like elastase family member 2A OS=Mus musculus GN=Cela2a PE=1 SV=1	Complete proteome;Disulfide bond;Hydrolase;Protease;Reference proteome;Secreted;Serine protease;Signal;Zymogen;	3.4.21.71;	K01346;	Eukaryota	Metazoa	Chordata	Mammalia	Rodentia	Muridae	Unknown GENUS	Unknown SPECIES	Unknown SUBSPECIES	10	0	0	16	12	0	4	0	0	0	0	0	0	0	10	0	0	0	17	0	65	0	4	0	3	0	22	169	111	0	33	8	23	0	0	30
Meta-Protein 223	BLAST_TTHY_HUMAN Transthyretin OS=Homo sapiens GN=TTR PE=1 SV=1_P02766	3D-structure;Amyloid;Amyloidosis;Complete proteome;Cytoplasm;Direct protein sequencing;Disease mutation;Gamma-carboxyglutamic acid;Glycoprotein;Hormone;Neuropathy;Phosphoprotein;Polymorphism;Reference proteome;Secreted;Signal;Thyroid hormone;Transport;	;	;K20731;	Eukaryota	Metazoa	Chordata	Mammalia	Unknown ORDER	Unknown FAMILY	Unknown GENUS	Unknown SPECIES	Unknown SUBSPECIES	8	2	1	7	1	5	0	4	81	55	14	53	2	17	5	5	0	17	6	4	27	10	21	5	45	0	4	26	56	41	29	51	45	0	16	21
Meta-Protein 239	BLAST_ALF_TREPA Fructose-bisphosphate aldolase OS=Treponema pallidum (strain Nichols) GN=fba PE=3 SV=1_O83668	Complete proteome;Glycolysis;Lyase;Metal-binding;Reference proteome;Zinc;	4.1.2.13;	K01624;	Unknown SUPERKINGDOM	Unknown KINGDOM	Unknown PHYLUM	Unknown CLASS	Unknown ORDER	Unknown FAMILY	Unknown GENUS	Unknown SPECIES	Unknown SUBSPECIES	5	28	39	0	0	51	31	2	71	14	0	55	1	15	0	2	6	19	4	15	3	111	28	34	8	39	1	0	2	10	0	0	30	77	0	0
Meta-Protein 192	BLAST_KDGK_THET8 2-dehydro-3-deoxygluconokinase OS=Thermus thermophilus (strain HB8 / ATCC 27634 / DSM 579) GN=kdgK PE=1 SV=1_Q53W83	3D-structure;ATP-binding;Alternative splicing;Carbohydrate metabolism;Complete proteome;Cytoplasm;Direct protein sequencing;Kinase;Magnesium;Metal-binding;Nucleotide-binding;Plasmid;Potassium;Reference proteome;Transferase;	2.7.1.15;2.7.1.4;2.7.1.45;2.7.1.92;	;K00847;K00852;K00874;K03338;	Unknown SUPERKINGDOM	Unknown KINGDOM	Unknown PHYLUM	Unknown CLASS	Unknown ORDER	Unknown FAMILY	Unknown GENUS	Unknown SPECIES	Unknown SUBSPECIES	2	11	16	1	7	36	52	30	27	3	1	10	7	16	5	17	13	18	15	6	1	51	15	33	6	43	12	9	31	1	0	12	2	51	25	15
Meta-Protein 819	LEGB_GOSHI Legumin B OS=Gossypium hirsutum GN=LEGB PE=2 SV=1	3D-structure;Complete proteome;Direct protein sequencing;Disulfide bond;Magnesium;Metal-binding;Pyrrolidone carboxylic acid;Reference proteome;Seed storage protein;Signal;Storage protein;	;	;	Eukaryota	Viridiplantae	Streptophyta	Unknown CLASS	Unknown ORDER	Unknown FAMILY	Unknown GENUS	Unknown SPECIES	Unknown SUBSPECIES	290	0	0	0	5	0	0	0	0	0	0	0	0	0	0	0	0	2	0	552	0	0	0	0	0	0	0	0	0	0	0	5	110	14	0	0
Meta-Protein 161	BLAST_RPOC_BACTN DNA-directed RNA polymerase subunit beta OS=Bacteroides thetaiotaomicron (strain ATCC 29148 / DSM 2079 / NCTC 10582 / E50 / VPI-5482) GN=rpoC PE=3 SV=1_Q8A470	3D-structure;Acetylation;Antibiotic resistance;Chloroplast;Complete proteome;Cyanelle;Cytoplasm;DNA-directed RNA polymerase;Direct protein sequencing;Initiation factor;Multifunctional enzyme;Nucleotidyltransferase;Organellar chromatophore;Phosphoprotein;Plastid;Protein biosynthesis;Reference proteome;Transcription;Transferase;	;2.7.7.6;	;K03046;K13797;K15029;	Unknown SUPERKINGDOM	Unknown KINGDOM	Unknown PHYLUM	Unknown CLASS	Unknown ORDER	Unknown FAMILY	Unknown GENUS	Unknown SPECIES	Unknown SUBSPECIES	31	22	5	6	9	30	8	33	36	22	8	14	19	17	7	11	24	13	13	16	15	73	13	9	9	32	3	25	17	3	6	12	21	25	18	32
Meta-Protein 16803	BLAST_PANP_VIBF1 Aspartate 1-decarboxylase OS=Vibrio fischeri (strain ATCC 700601 / ES114) GN=panP PE=1 SV=1_Q5E6F9	Complete proteome;Decarboxylase;Lyase;Pantothenate biosynthesis;Pyridoxal phosphate;Reference proteome;	4.1.1.11;	K01580;	Bacteria	Unknown KINGDOM	Proteobacteria	Gammaproteobacteria	Vibrionales	Vibrionaceae	Aliivibrio	Aliivibrio fischeri	Vibrio fischeri ES114	23	14	8	22	23	26	17	13	7	10	4	20	27	11	6	5	15	4	7	19	21	6	25	19	23	25	21	24	23	19	20	22	18	22	31	19
Meta-Protein 168	SBP1_PONAB Selenium-binding protein 1 OS=Pongo abelii GN=SELENBP1 PE=2 SV=1	Acetylation;Alternative splicing;Complete proteome;Cytoplasm;Direct protein sequencing;Membrane;Nucleus;Phosphoprotein;Protein transport;Reference proteome;Selenium;Transport;	;	K17285;	Eukaryota	Metazoa	Chordata	Unknown CLASS	Unknown ORDER	Unknown FAMILY	Unknown GENUS	Unknown SPECIES	Unknown SUBSPECIES	34	0	6	5	44	46	34	2	14	12	2	4	4	8	13	5	0	23	4	21	26	37	30	31	70	5	6	6	30	60	3	33	12	2	6	2
Meta-Protein 213	BLAST_ACE_MESAU Angiotensin-converting enzyme OS=Mesocricetus auratus GN=Ace PE=2 SV=1_Q50JE5	3D-structure;Alternative splicing;Carboxypeptidase;Cell membrane;Complete proteome;Cytoplasm;Cytoplasmic vesicle;Direct protein sequencing;Disulfide bond;Glycoprotein;Hydrolase;Membrane;Metal-binding;Metalloprotease;Phosphoprotein;Polymorphism;Protease;Reference proteome;Repeat;Secreted;Signal;Transmembrane;Transmembrane helix;Zinc;	;3.2.1.-;3.4.15.1;	;K01283;	Eukaryota	Metazoa	Chordata	Unknown CLASS	Unknown ORDER	Unknown FAMILY	Unknown GENUS	Unknown SPECIES	Unknown SUBSPECIES	9	0	0	4	12	42	45	0	11	14	2	10	5	18	0	4	0	8	2	10	0	44	43	24	6	0	39	56	0	0	23	29	0	0	19	2
Meta-Protein 325	XPP2_HUMAN Xaa-Pro aminopeptidase 2 OS=Homo sapiens GN=XPNPEP2 PE=1 SV=3	Aminopeptidase;Cell membrane;Complete proteome;Direct protein sequencing;GPI-anchor;Glycoprotein;Hydrolase;Lipoprotein;Membrane;Metal-binding;Metalloprotease;Polymorphism;Protease;Reference proteome;Signal;Zinc;	3.4.11.9;	K14208;	Eukaryota	Metazoa	Chordata	Mammalia	Unknown ORDER	Unknown FAMILY	Unknown GENUS	Unknown SPECIES	Unknown SUBSPECIES	0	9	0	0	0	4	1	16	4	24	0	1	3	6	0	8	4	0	3	17	43	9	20	23	2	18	18	46	23	0	32	31	0	17	22	20
Meta-Protein 193	BLAST_XYLA_BACV8 Xylose isomerase OS=Bacteroides vulgatus (strain ATCC 8482 / DSM 1447 / JCM 5826 / NBRC 14291 / NCTC 11154) GN=xylA PE=3 SV=1_A6L792	3D-structure;Carbohydrate metabolism;Complete proteome;Cytoplasm;Isomerase;Magnesium;Metal-binding;Pentose shunt;Reference proteome;Xylose metabolism;	5.3.1.5;	K01805;	Unknown SUPERKINGDOM	Unknown KINGDOM	Unknown PHYLUM	Unknown CLASS	Unknown ORDER	Unknown FAMILY	Unknown GENUS	Unknown SPECIES	Unknown SUBSPECIES	10	4	15	5	5	0	39	9	5	8	2	27	5	53	4	2	8	0	10	29	0	0	49	3	11	28	13	3	29	34	0	0	29	61	10	1
Meta-Protein 1261	BLAST_TRFL_HUMAN Lactotransferrin OS=Homo sapiens GN=LTF PE=1 SV=6_P02788	3D-structure;Alternative promoter usage;Alternative splicing;Antibiotic;Antimicrobial;Complete proteome;Cytoplasm;DNA-binding;Direct protein sequencing;Disease mutation;Disulfide bond;Glycoprotein;Heparin-binding;Hydrolase;Immunity;Ion transport;Iron;Iron transport;Isopeptide bond;Metal-binding;Methylation;Nucleus;Osteogenesis;Phosphoprotein;Polymorphism;Protease;Reference proteome;Repeat;Secrete…	;3.4.21.-;	;K14736;K17283;	Unknown SUPERKINGDOM	Unknown KINGDOM	Unknown PHYLUM	Unknown CLASS	Unknown ORDER	Unknown FAMILY	Unknown GENUS	Unknown SPECIES	Unknown SUBSPECIES	0	0	0	0	0	0	0	0	0	6	0	20	0	0	0	0	0	0	0	4	2	0	0	102	4	0	0	3	16	0	339	0	349	0	3	0
Meta-Protein 306	BLAST_TAL_AGARV Probable transaldolase OS=Agathobacter rectalis (strain ATCC 33656 / DSM 3377 / JCM 17463 / KCTC 5835 / VPI 0990) GN=tal PE=3 SV=1_C4ZF71	3D-structure;Complete proteome;Cytoplasm;Direct protein sequencing;Pentose shunt;Phosphoprotein;Reference proteome;Schiff base;Transferase;	2.2.1.2;	;K00616;	Unknown SUPERKINGDOM	Unknown KINGDOM	Unknown PHYLUM	Unknown CLASS	Unknown ORDER	Unknown FAMILY	Unknown GENUS	Unknown SPECIES	Unknown SUBSPECIES	18	15	26	18	21	28	42	49	70	27	7	40	9	19	1	10	9	2	2	13	0	5	9	10	5	27	13	4	5	38	1	15	18	56	10	4
Meta-Protein 329	BLAST_OMPA_ESCF3 Outer membrane protein A OS=Escherichia fergusonii (strain ATCC 35469 / DSM 13698 / CDC 0568-73) GN=ompA PE=3 SV=2_B7LNW7	3D-structure;Cell outer membrane;Complete proteome;Conjugation;Direct protein sequencing;Disulfide bond;Ion transport;Membrane;Porin;Reference proteome;Repeat;Signal;Transmembrane;Transmembrane beta strand;Transport;	;	;K03286;	Bacteria	Unknown KINGDOM	Proteobacteria	Gammaproteobacteria	Unknown ORDER	Unknown FAMILY	Unknown GENUS	Unknown SPECIES	Unknown SUBSPECIES	0	0	0	0	0	0	3	7	2	0	0	0	0	0	0	1	2	0	0	0	34	96	0	1	57	0	2	2	8	38	2	0	0	0	1	112
Meta-Protein 171	BLAST_IGJ_HUMAN Immunoglobulin J chain OS=Homo sapiens GN=JCHAIN PE=1 SV=4_P01591	Complete proteome;Direct protein sequencing;Disulfide bond;Glycoprotein;Glycosyltransferase;Pyrrolidone carboxylic acid;Reference proteome;Secreted;Signal;Transferase;	;2.4.1.-;	;	Unknown SUPERKINGDOM	Unknown KINGDOM	Unknown PHYLUM	Unknown CLASS	Unknown ORDER	Unknown FAMILY	Unknown GENUS	Unknown SPECIES	Unknown SUBSPECIES	18	18	0	0	2	13	26	17	29	18	8	12	7	4	9	8	10	6	0	6	14	0	8	76	61	17	22	18	43	7	44	7	20	24	9	36
Meta-Protein 419	BLAST_TPIS_LACP7 Triosephosphate isomerase OS=Lachnoclostridium phytofermentans (strain ATCC 700394 / DSM 18823 / ISDg) GN=tpiA PE=3 SV=1_A9KPF8	Complete proteome;Cytoplasm;Gluconeogenesis;Glycolysis;Isomerase;Pentose shunt;Reference proteome;	5.3.1.1;	K01803;	Unknown SUPERKINGDOM	Unknown KINGDOM	Unknown PHYLUM	Unknown CLASS	Unknown ORDER	Unknown FAMILY	Unknown GENUS	Unknown SPECIES	Unknown SUBSPECIES	18	24	15	17	9	28	33	14	33	20	10	41	7	12	15	13	10	7	5	14	0	0	24	6	17	48	13	20	6	29	1	23	35	33	24	0
Meta-Protein 228	BLAST_ETFB_CLOAB Electron transfer flavoprotein subunit beta OS=Clostridium acetobutylicum (strain ATCC 824 / DSM 792 / JCM 1419 / LMG 5710 / VKM B-1787) GN=etfB PE=3 SV=2_P52040	Complete proteome;Cytoplasm;Electron transport;FAD;Flavoprotein;NAD;Oxidoreductase;Reference proteome;Transport;	;1.3.1.108;	;K03521;	Unknown SUPERKINGDOM	Unknown KINGDOM	Unknown PHYLUM	Unknown CLASS	Unknown ORDER	Unknown FAMILY	Unknown GENUS	Unknown SPECIES	Unknown SUBSPECIES	0	39	19	15	3	13	36	33	76	41	9	49	23	34	5	13	12	3	2	31	0	5	8	0	0	75	12	0	0	10	0	12	19	19	5	0
Meta-Protein 104	Metagenome unknown				Unknown SUPERKINGDOM	Unknown KINGDOM	Unknown PHYLUM	Unknown CLASS	Unknown ORDER	Unknown FAMILY	Unknown GENUS	Unknown SPECIES	Unknown SUBSPECIES	0	14	21	4	0	25	18	22	30	25	4	21	12	8	2	3	7	1	3	23	2	18	12	30	9	17	18	7	7	30	7	27	12	40	29	6
Meta-Protein 312	Metagenome unknown				Unknown SUPERKINGDOM	Unknown KINGDOM	Unknown PHYLUM	Unknown CLASS	Unknown ORDER	Unknown FAMILY	Unknown GENUS	Unknown SPECIES	Unknown SUBSPECIES	304	44	2	25	37	5	15	15	10	0	1	41	0	0	9	4	0	6	11	5	0	7	12	0	34	10	1	0	0	117	0	28	0	104	33	0
Meta-Protein 197	BLAST_DHE4_CORGL NADP-specific glutamate dehydrogenase OS=Corynebacterium glutamicum (strain ATCC 13032 / DSM 20300 / JCM 1318 / LMG 3730 / NCIMB 10025) GN=gdh PE=1 SV=2_P31026	3D-structure;Complete proteome;NADP;Oxidoreductase;Reference proteome;	1.4.1.4;	;K00262;	Unknown SUPERKINGDOM	Unknown KINGDOM	Unknown PHYLUM	Unknown CLASS	Unknown ORDER	Unknown FAMILY	Unknown GENUS	Unknown SPECIES	Unknown SUBSPECIES	20	21	20	7	64	26	10	46	23	18	1	27	17	12	0	6	4	2	13	11	0	19	8	11	15	19	10	8	0	12	6	12	16	117	11	2
Meta-Protein 452	LG3BP_PONAB Galectin-3-binding protein OS=Pongo abelii GN=LGALS3BP PE=1 SV=1	3D-structure;Cell adhesion;Complete proteome;Direct protein sequencing;Disulfide bond;Extracellular matrix;Glycoprotein;Reference proteome;Secreted;Signal;	;	;K17300;	Eukaryota	Metazoa	Chordata	Mammalia	Primates	Hominidae	Unknown GENUS	Unknown SPECIES	Unknown SUBSPECIES	15	24	6	0	3	23	31	15	5	6	0	3	4	3	0	0	5	10	0	11	19	2	27	21	61	9	16	13	19	17	40	8	6	12	22	4
Meta-Protein 259	BLAST_ETFA_CLOAB Electron transfer flavoprotein subunit alpha OS=Clostridium acetobutylicum (strain ATCC 824 / DSM 792 / JCM 1419 / LMG 5710 / VKM B-1787) GN=etfA PE=3 SV=2_P52039	3D-structure;4Fe-4S;Acetylation;Alternative splicing;Complete proteome;Cytoplasm;Direct protein sequencing;Disease mutation;Electron transport;FAD;Flavoprotein;Glutaricaciduria;Iron;Iron-sulfur;Metal-binding;Mitochondrion;NAD;Oxidoreductase;Phosphoprotein;Polymorphism;Reference proteome;Transit peptide;Transport;	;1.3.1.108;	;K03522;	Unknown SUPERKINGDOM	Unknown KINGDOM	Unknown PHYLUM	Unknown CLASS	Unknown ORDER	Unknown FAMILY	Unknown GENUS	Unknown SPECIES	Unknown SUBSPECIES	0	6	17	23	1	10	42	7	151	35	3	38	26	35	1	0	9	0	0	27	0	2	9	0	0	62	13	0	0	20	0	14	14	9	11	0
Meta-Protein 276	BLAST_Y4MM_SINFN Uncharacterized protein y4mM OS=Sinorhizobium fredii (strain NBRC 101917 / NGR234) GN=NGR_a02460 PE=3 SV=1_P55572	3D-structure;Calcium;Cell membrane;Complete proteome;Direct protein sequencing;Membrane;Metal-binding;Periplasm;Plasmid;Reference proteome;Signal;Sugar transport;Transmembrane;Transmembrane helix;Transport;	;	;K21395;	Unknown SUPERKINGDOM	Unknown KINGDOM	Unknown PHYLUM	Unknown CLASS	Unknown ORDER	Unknown FAMILY	Unknown GENUS	Unknown SPECIES	Unknown SUBSPECIES	0	13	50	11	18	33	36	37	72	6	2	20	8	9	0	12	23	8	1	4	0	22	1	40	0	6	7	3	0	3	0	30	2	52	31	0
Meta-Protein 322	CBPA2_MOUSE Carboxypeptidase A2 OS=Mus musculus GN=Cpa2 PE=1 SV=1	3D-structure;Carboxypeptidase;Complete proteome;Direct protein sequencing;Disulfide bond;Hydrolase;Metal-binding;Metalloprotease;Polymorphism;Protease;Reference proteome;Secreted;Signal;Zinc;Zymogen;	3.4.17.15;	;K01298;	Eukaryota	Metazoa	Chordata	Mammalia	Unknown ORDER	Unknown FAMILY	Unknown GENUS	Unknown SPECIES	Unknown SUBSPECIES	28	19	11	0	22	0	16	2	39	0	8	0	0	49	10	18	4	2	4	0	128	0	0	0	21	0	8	103	2	4	30	0	0	0	29	12
Meta-Protein 203	BLAST_ETFA_CLOPR Acryloyl-CoA reductase electron transfer subunit beta OS=Clostridium propionicum GN=acrA PE=1 SV=1_G3KIM6	Cytoplasm;Electron transport;FAD;Flavoprotein;Transport;	;	;	Unknown SUPERKINGDOM	Unknown KINGDOM	Unknown PHYLUM	Unknown CLASS	Unknown ORDER	Unknown FAMILY	Unknown GENUS	Unknown SPECIES	Unknown SUBSPECIES	7	43	44	0	9	78	35	45	136	22	0	20	32	16	1	5	44	12	9	3	1	24	0	22	4	39	2	0	0	0	0	15	2	60	7	0
Meta-Protein 13	BLAST_KCRU_HUMAN Creatine kinase U-type, mitochondrial OS=Homo sapiens GN=CKMT1A PE=1 SV=1_P12532	3D-structure;ATP-binding;Alternative splicing;Complete proteome;Direct protein sequencing;Kinase;Membrane;Mitochondrion;Mitochondrion inner membrane;Nucleotide-binding;Phosphoprotein;Reference proteome;Transferase;Transit peptide;	2.7.3.2;	;K00933;	Eukaryota	Metazoa	Chordata	Unknown CLASS	Unknown ORDER	Unknown FAMILY	Unknown GENUS	Unknown SPECIES	Unknown SUBSPECIES	27	8	8	3	24	15	18	6	33	8	0	19	8	1	3	0	0	8	0	0	24	27	29	56	8	4	139	48	13	14	13	8	0	11	8	1
Meta-Protein 425	BLAST_RL5_CLOK5 50S ribosomal protein L5 OS=Clostridium kluyveri (strain ATCC 8527 / DSM 555 / NCIMB 10680) GN=rplE PE=3 SV=1_A5N4Q9	3D-structure;Alternative splicing;Chloroplast;Complete proteome;Direct protein sequencing;Nucleus;Organellar chromatophore;Plastid;Polymorphism;RNA-binding;Reference proteome;Ribonucleoprotein;Ribosomal protein;Transit peptide;Ubl conjugation pathway;rRNA-binding;tRNA-binding;	;	;K02931;K10290;	Unknown SUPERKINGDOM	Unknown KINGDOM	Unknown PHYLUM	Unknown CLASS	Unknown ORDER	Unknown FAMILY	Unknown GENUS	Unknown SPECIES	Unknown SUBSPECIES	20	30	10	14	3	15	32	32	36	26	11	27	14	21	13	15	12	10	4	11	0	7	23	4	20	42	10	16	5	20	2	14	13	22	7	18
Meta-Protein 240	BLAST_RPOB_PELTS DNA-directed RNA polymerase subunit beta OS=Pelotomaculum thermopropionicum (strain DSM 13744 / JCM 10971 / SI) GN=rpoB PE=3 SV=1_A5D5I2	3D-structure;4Fe-4S;Acetylation;Antibiotic resistance;Chloroplast;Complete proteome;DNA-directed RNA polymerase;Direct protein sequencing;Iron;Iron-sulfur;Metal-binding;Nucleotidyltransferase;Oxidoreductase;Plastid;Reference proteome;S-adenosyl-L-methionine;Transcription;Transferase;	1.97.1.-;2.7.7.6;	;K03043;K04069;	Unknown SUPERKINGDOM	Unknown KINGDOM	Unknown PHYLUM	Unknown CLASS	Unknown ORDER	Unknown FAMILY	Unknown GENUS	Unknown SPECIES	Unknown SUBSPECIES	10	17	20	3	2	23	12	22	18	19	5	21	2	11	3	9	19	17	4	22	5	54	10	14	12	22	11	22	3	11	4	6	15	56	16	4
Meta-Protein 24255	BLAST_CZCB_CUPMC Cobalt-zinc-cadmium resistance protein CzcB OS=Cupriavidus metallidurans (strain ATCC 43123 / DSM 2839 / NBRC 102507 / CH34) GN=czcB PE=1 SV=2_P13510	Cadmium resistance;Cell inner membrane;Cell membrane;Cobalt;Coiled coil;Complete proteome;Membrane;Plasmid;Reference proteome;Transmembrane;Transmembrane helix;Transport;Zinc;	;	K15727;	Bacteria	Unknown KINGDOM	Proteobacteria	Betaproteobacteria	Burkholderiales	Burkholderiaceae	Cupriavidus	Cupriavidus metallidurans	Cupriavidus metallidurans CH34	5	0	0	3	4	0	7	2	2	1	1	3	4	2	0	0	0	0	0	4	47	5	30	61	47	1	18	62	52	59	11	14	13	0	10	15
Meta-Protein 383	BLAST_PGK_BACTN Phosphoglycerate kinase OS=Bacteroides thetaiotaomicron (strain ATCC 29148 / DSM 2079 / NCTC 10582 / E50 / VPI-5482) GN=pgk PE=3 SV=1_Q8A753	ATP-binding;Complete proteome;Cytoplasm;Glycolysis;Kinase;Nucleotide-binding;Reference proteome;Transferase;	2.7.2.3;	K00927;	Unknown SUPERKINGDOM	Unknown KINGDOM	Unknown PHYLUM	Unknown CLASS	Unknown ORDER	Unknown FAMILY	Unknown GENUS	Unknown SPECIES	Unknown SUBSPECIES	0	7	12	0	1	51	44	4	31	0	0	9	1	15	2	18	7	22	1	7	3	127	20	10	21	11	4	2	0	0	1	0	14	43	17	9
Meta-Protein 2998	BLAST_PRO7_ORYSI Prolamin PPROL 14E OS=Oryza sativa subsp. indica PE=3 SV=1_P0C5E5	Complete proteome;Ion transport;Magnesium;Membrane;Mitochondrion;Mitochondrion inner membrane;Pyrrolidone carboxylic acid;Reference proteome;Seed storage protein;Signal;Storage protein;Transit peptide;Transmembrane;Transmembrane helix;Transport;Vacuole;	;	;K16075;	Eukaryota	Unknown KINGDOM	Unknown PHYLUM	Unknown CLASS	Unknown ORDER	Unknown FAMILY	Unknown GENUS	Unknown SPECIES	Unknown SUBSPECIES	0	0	3	0	8	0	0	6	0	0	0	23	12	0	0	9	0	5	0	0	0	70	0	0	2	49	0	0	412	31	0	0	54	78	0	0
Meta-Protein 813	BLAST_PHK_BIFA0 Probable phosphoketolase OS=Bifidobacterium animalis subsp. lactis (strain AD011) GN=BLA_1483 PE=3 SV=1_B8DUT6	Complete proteome;Direct protein sequencing;Lyase;Reference proteome;Thiamine pyrophosphate;	4.1.2.-;4.1.2.22;4.1.2.9;	K01621;	Unknown SUPERKINGDOM	Unknown KINGDOM	Unknown PHYLUM	Unknown CLASS	Unknown ORDER	Unknown FAMILY	Unknown GENUS	Unknown SPECIES	Unknown SUBSPECIES	3	69	23	5	58	51	152	24	56	18	1	0	24	84	1	0	12	14	2	11	0	4	66	0	11	18	29	6	0	0	1	15	37	9	79	0
Meta-Protein 288	BLAST_RS7_EUBE2 30S ribosomal protein S7 OS=Eubacterium eligens (strain ATCC 27750 / VPI C15-48) GN=rpsG PE=3 SV=1_C4Z2R7	3D-structure;Complete proteome;Direct protein sequencing;RNA-binding;Reference proteome;Ribonucleoprotein;Ribosomal protein;rRNA-binding;tRNA-binding;	;	K02992;	Unknown SUPERKINGDOM	Unknown KINGDOM	Unknown PHYLUM	Unknown CLASS	Unknown ORDER	Unknown FAMILY	Unknown GENUS	Unknown SPECIES	Unknown SUBSPECIES	29	23	0	7	8	27	24	49	27	40	3	27	3	33	9	11	14	1	1	4	4	6	21	5	25	31	1	7	12	16	6	11	14	18	5	13
Meta-Protein 179	BLAST_LIPO_BACSU Lipoprotein LipO OS=Bacillus subtilis (strain 168) GN=lipO PE=1 SV=1_P37966	Cell membrane;Complete proteome;Lipoprotein;Membrane;Palmitate;Reference proteome;Signal;	;	K17318;	Unknown SUPERKINGDOM	Unknown KINGDOM	Unknown PHYLUM	Unknown CLASS	Unknown ORDER	Unknown FAMILY	Unknown GENUS	Unknown SPECIES	Unknown SUBSPECIES	0	20	65	24	2	0	0	53	116	42	0	12	19	1	3	13	8	0	4	26	0	0	3	0	0	26	14	29	0	0	7	0	22	15	4	1
Meta-Protein 316	BLAST_ENTK_HUMAN Enteropeptidase OS=Homo sapiens GN=TMPRSS15 PE=1 SV=3_P98073	3D-structure;Alternative splicing;Complete proteome;Direct protein sequencing;Disulfide bond;Glycoprotein;Hydrolase;Lipoprotein;Membrane;Myristate;Polymorphism;Protease;Reference proteome;Repeat;Serine protease;Signal-anchor;Transmembrane;Transmembrane helix;Zymogen;	3.4.21.9;	K01316;	Eukaryota	Metazoa	Chordata	Mammalia	Unknown ORDER	Unknown FAMILY	Unknown GENUS	Unknown SPECIES	Unknown SUBSPECIES	13	0	0	3	10	14	9	20	5	13	6	16	0	17	6	3	0	9	11	3	1	27	37	19	17	17	23	9	16	33	0	51	19	0	28	11
Meta-Protein 950	Metagenome unknown				Unknown SUPERKINGDOM	Unknown KINGDOM	Unknown PHYLUM	Unknown CLASS	Unknown ORDER	Unknown FAMILY	Unknown GENUS	Unknown SPECIES	Unknown SUBSPECIES	38	1	28	0	22	0	0	0	0	0	0	9	26	3	0	0	0	0	42	1	0	0	1	1	172	0	0	0	0	0	0	61	235	0	0	0
Meta-Protein 462	BLAST_UXAC_BACV8 Uronate isomerase OS=Bacteroides vulgatus (strain ATCC 8482 / DSM 1447 / JCM 5826 / NBRC 14291 / NCTC 11154) GN=uxaC PE=3 SV=1_A6L4U4	3D-structure;Complete proteome;Isomerase;Reference proteome;	5.3.1.12;	K01812;	Unknown SUPERKINGDOM	Unknown KINGDOM	Unknown PHYLUM	Unknown CLASS	Unknown ORDER	Unknown FAMILY	Unknown GENUS	Unknown SPECIES	Unknown SUBSPECIES	15	4	0	3	41	7	37	0	0	1	1	1	0	6	2	2	0	12	5	9	17	62	16	12	13	8	1	4	64	46	2	2	0	25	19	31
Meta-Protein 501	BLAST_CDHR5_HUMAN Cadherin-related family member 5 OS=Homo sapiens GN=CDHR5 PE=1 SV=3_Q9HBB8	Alternative splicing;Calcium;Cell membrane;Cell projection;Complete proteome;Differentiation;Glycoprotein;Membrane;Phosphoprotein;Polymorphism;Reference proteome;Repeat;Signal;Transmembrane;Transmembrane helix;	;	K16505;	Eukaryota	Metazoa	Chordata	Mammalia	Primates	Hominidae	Homo	Homo sapiens	Unknown SUBSPECIES	17	0	12	7	7	14	11	20	13	4	3	6	10	13	0	6	0	1	3	15	21	8	36	18	26	10	31	34	14	20	14	43	18	0	10	8
Meta-Protein 410	BLAST_CH60_BACV8 60 kDa chaperonin OS=Bacteroides vulgatus (strain ATCC 8482 / DSM 1447 / JCM 5826 / NBRC 14291 / NCTC 11154) GN=groL PE=3 SV=1_A6KXA0	ATP-binding;Chaperone;Complete proteome;Cytoplasm;Direct protein sequencing;Nucleotide-binding;Reference proteome;	;	;K04077;	Unknown SUPERKINGDOM	Unknown KINGDOM	Unknown PHYLUM	Unknown CLASS	Unknown ORDER	Unknown FAMILY	Unknown GENUS	Unknown SPECIES	Unknown SUBSPECIES	2	20	48	1	1	2	20	27	120	3	0	62	20	2	0	8	13	3	3	32	1	13	33	4	27	20	18	13	2	9	1	0	22	84	4	0
Meta-Protein 616	BLAST_YTFQ_ECOLI ABC transporter periplasmic-binding protein YtfQ OS=Escherichia coli (strain K12) GN=ytfQ PE=1 SV=1_P39325	3D-structure;Complete proteome;Direct protein sequencing;Periplasm;Reference proteome;Signal;Transport;	;	K02058;	Unknown SUPERKINGDOM	Unknown KINGDOM	Unknown PHYLUM	Unknown CLASS	Unknown ORDER	Unknown FAMILY	Unknown GENUS	Unknown SPECIES	Unknown SUBSPECIES	40	31	9	22	24	11	10	13	24	9	9	52	17	5	2	3	1	2	1	26	0	0	11	0	0	26	8	6	0	16	0	5	25	51	27	0
Meta-Protein 189	Metagenome unknown				Unknown SUPERKINGDOM	Unknown KINGDOM	Unknown PHYLUM	Unknown CLASS	Unknown ORDER	Unknown FAMILY	Unknown GENUS	Unknown SPECIES	Unknown SUBSPECIES	9	21	19	5	5	24	22	14	28	16	7	23	10	15	5	8	12	3	3	18	2	15	12	14	11	23	20	11	11	18	5	8	10	21	16	6
Meta-Protein 362	BLAST_GRCA_VIBCB Autonomous glycyl radical cofactor OS=Vibrio campbellii (strain ATCC BAA-1116 / BB120) GN=grcA PE=3 SV=1_A7MS83	Acyltransferase;Complete proteome;Cytoplasm;Organic radical;Reference proteome;Transferase;	;2.3.1.54;	K00656;K06866;	Bacteria	Unknown KINGDOM	Proteobacteria	Gammaproteobacteria	Unknown ORDER	Unknown FAMILY	Unknown GENUS	Unknown SPECIES	Unknown SUBSPECIES	28	66	36	3	4	15	21	30	36	40	0	47	17	12	18	2	34	15	12	21	0	28	0	0	0	53	6	0	0	0	0	6	0	17	25	0
Meta-Protein 143	BLAST_RL1_CLOTH 50S ribosomal protein L1 OS=Clostridium thermocellum (strain ATCC 27405 / DSM 1237 / NBRC 103400 / NCIMB 10682 / NRRL B-4536 / VPI 7372) GN=rplA PE=3 SV=1_A3DIZ1	Complete proteome;RNA-binding;Reference proteome;Repressor;Ribonucleoprotein;Ribosomal protein;Translation regulation;rRNA-binding;tRNA-binding;	;	;K02863;	Unknown SUPERKINGDOM	Unknown KINGDOM	Unknown PHYLUM	Unknown CLASS	Unknown ORDER	Unknown FAMILY	Unknown GENUS	Unknown SPECIES	Unknown SUBSPECIES	39	34	9	12	5	49	45	36	47	26	5	43	5	13	6	9	5	0	1	0	0	0	20	0	22	32	4	0	28	38	3	4	20	28	0	0
Meta-Protein 358	BLAST_UGPC_BARBK sn-glycerol-3-phosphate import ATP-binding protein UgpC OS=Bartonella bacilliformis (strain ATCC 35685 / KC583) GN=ugpC PE=3 SV=1_A1URR2	3D-structure;ATP-binding;Cell inner membrane;Cell membrane;Complete proteome;Hydrolase;Ion transport;Iron;Iron transport;Magnesium;Membrane;Metal-binding;Nucleotide-binding;Plasmid;Polysaccharide transport;Reference proteome;Sugar transport;Transport;	;3.6.3.-;3.6.3.19;3.6.3.20;3.6.3.30;	K02010;K05816;K10112;	Unknown SUPERKINGDOM	Unknown KINGDOM	Unknown PHYLUM	Unknown CLASS	Unknown ORDER	Unknown FAMILY	Unknown GENUS	Unknown SPECIES	Unknown SUBSPECIES	35	44	29	0	26	60	42	60	63	35	0	24	23	22	0	13	51	15	13	7	0	24	0	10	0	34	2	0	0	0	0	5	1	42	22	0
Meta-Protein 866	XYLA_BIFAA Xylose isomerase OS=Bifidobacterium adolescentis (strain ATCC 15703 / DSM 20083 / NCTC 11814 / E194a) GN=xylA PE=3 SV=1	3D-structure;Carbohydrate metabolism;Complete proteome;Cytoplasm;Direct protein sequencing;Isomerase;Magnesium;Manganese;Metal-binding;Pentose shunt;Reference proteome;Xylose metabolism;	5.3.1.5;	;K01805;	Unknown SUPERKINGDOM	Unknown KINGDOM	Unknown PHYLUM	Unknown CLASS	Unknown ORDER	Unknown FAMILY	Unknown GENUS	Unknown SPECIES	Unknown SUBSPECIES	3	53	25	6	37	54	104	41	43	45	0	0	55	119	0	0	2	1	2	48	0	0	48	0	9	4	91	0	0	0	4	51	46	6	23	0
Meta-Protein 3781	ACDS_MEGEL Acyl-CoA dehydrogenase, short-chain specific OS=Megasphaera elsdenii PE=1 SV=1	3D-structure;Direct protein sequencing;FAD;Fatty acid metabolism;Flavoprotein;Lipid metabolism;Oxidoreductase;	1.3.8.1;	;	Bacteria	Unknown KINGDOM	Firmicutes	Negativicutes	Selenomonadales	Veillonellaceae	Megasphaera	Megasphaera elsdenii	Unknown SUBSPECIES	0	0	0	0	46	0	0	0	0	0	0	0	0	2	0	0	0	0	0	22	0	0	47	0	0	0	23	0	0	0	0	8	0	0	0	0
Meta-Protein 142	BLAST_O16G_BACCO Oligo-1,6-glucosidase OS=Bacillus coagulans GN=malL PE=3 SV=1_Q45101	3D-structure;Calcium;Complete proteome;Cytoplasm;Direct protein sequencing;Disulfide bond;Glycosidase;Glycosyltransferase;Hydrolase;Metal-binding;Reference proteome;Secreted;Signal;Transferase;	2.4.1.19;3.2.1.10;	;K01182;	Unknown SUPERKINGDOM	Unknown KINGDOM	Unknown PHYLUM	Unknown CLASS	Unknown ORDER	Unknown FAMILY	Unknown GENUS	Unknown SPECIES	Unknown SUBSPECIES	0	23	18	2	2	27	0	0	20	2	0	20	15	26	0	0	0	0	15	30	0	11	0	0	0	0	23	0	0	8	0	0	0	124	0	0
Meta-Protein 195	BLAST_PDUA_SALTY Propanediol utilization protein PduA OS=Salmonella typhimurium (strain LT2 / SGSC1412 / ATCC 700720) GN=pduA PE=1 SV=1_P0A1C7	3D-structure;Complete proteome;Reference proteome;	;	;	Unknown SUPERKINGDOM	Unknown KINGDOM	Unknown PHYLUM	Unknown CLASS	Unknown ORDER	Unknown FAMILY	Unknown GENUS	Unknown SPECIES	Unknown SUBSPECIES	2	20	19	4	1	9	18	17	20	6	9	13	1	7	2	5	11	4	2	6	2	18	8	25	26	40	9	3	12	21	0	18	23	23	7	4
Meta-Protein 24257	BLAST_PKN1_CALS4 Probable serine/threonine-protein kinase Sps1 OS=Caldanaerobacter subterraneus subsp. tengcongensis (strain DSM 15242 / JCM 11007 / NBRC 100824 / MB4) GN=sps1 PE=3 SV=1_Q8R9T6	ATP-binding;Complete proteome;Kinase;Nucleotide-binding;Reference proteome;Repeat;Serine/threonine-protein kinase;Transferase;	2.7.11.1;	K12132;	Bacteria	Unknown KINGDOM	Firmicutes	Clostridia	Thermoanaerobacterales	Thermoanaerobacteraceae	Caldanaerobacter	Thermoanaerobacter tengcongensis MB4	Caldanaerobacter subterraneus subsp. tengcongensis	4	1	0	2	4	1	3	1	1	2	2	4	3	0	1	0	0	0	0	4	49	7	30	57	42	3	17	54	53	48	11	14	10	0	1	15
Meta-Protein 428	BLAST_GLPK_AGARV Glycerol kinase OS=Agathobacter rectalis (strain ATCC 33656 / DSM 3377 / JCM 17463 / KCTC 5835 / VPI 0990) GN=glpK PE=3 SV=1_C4ZGB4	ATP-binding;Complete proteome;Glycerol metabolism;Kinase;Nucleotide-binding;Reference proteome;Transferase;	2.7.1.30;	K00864;	Unknown SUPERKINGDOM	Unknown KINGDOM	Unknown PHYLUM	Unknown CLASS	Unknown ORDER	Unknown FAMILY	Unknown GENUS	Unknown SPECIES	Unknown SUBSPECIES	27	42	21	5	20	23	15	21	11	16	1	38	20	6	3	0	3	0	7	11	0	8	6	2	0	30	0	0	1	0	1	0	48	12	24	0
Meta-Protein 2224	Metagenome unknown				Unknown SUPERKINGDOM	Unknown KINGDOM	Unknown PHYLUM	Unknown CLASS	Unknown ORDER	Unknown FAMILY	Unknown GENUS	Unknown SPECIES	Unknown SUBSPECIES	0	0	0	2	1	105	20	0	0	0	0	0	2	0	0	0	0	73	0	0	0	97	2	70	0	0	0	0	103	54	0	0	0	0	37	4
Meta-Protein 11	BLAST_GLB63_ORYSJ 63 kDa globulin-like protein OS=Oryza sativa subsp. japonica GN=Os03g0663800 PE=1 SV=1_Q75GX9	Allergen;Alternative splicing;Complete proteome;Direct protein sequencing;Glycoprotein;Reference proteome;Secreted;Seed storage protein;Signal;Storage protein;	;	;	Eukaryota	Viridiplantae	Streptophyta	Liliopsida	Poales	Poaceae	Unknown GENUS	Unknown SPECIES	Unknown SUBSPECIES	0	0	44	0	0	20	0	1	0	72	0	0	0	2	3	0	1	1	0	47	0	1	0	0	0	1	8	0	0	0	5	0	5	120	0	0
Meta-Protein 280	BLAST_ILV5_YEAST Ketol-acid reductoisomerase, mitochondrial OS=Saccharomyces cerevisiae (strain ATCC 204508 / S288c) GN=ILV5 PE=1 SV=1_P06168	Amino-acid biosynthesis;Branched-chain amino acid biosynthesis;Complete proteome;Direct protein sequencing;Isomerase;Magnesium;Metal-binding;Mitochondrion;NAD;NADP;Oxidoreductase;Phosphoprotein;Reference proteome;Transit peptide;	1.1.1.382;1.1.1.86;	K00053;	Unknown SUPERKINGDOM	Unknown KINGDOM	Unknown PHYLUM	Unknown CLASS	Unknown ORDER	Unknown FAMILY	Unknown GENUS	Unknown SPECIES	Unknown SUBSPECIES	0	3	0	0	6	39	78	1	0	0	0	1	0	8	0	2	0	16	0	9	0	98	15	31	8	6	2	1	0	5	0	20	2	46	26	11
Meta-Protein 423	BLAST_GNO_GLUOX Gluconate 5-dehydrogenase OS=Gluconobacter oxydans (strain 621H) GN=gno PE=1 SV=1_P50199	Carbohydrate metabolism;Complete proteome;Cytoplasm;Direct protein sequencing;Fatty acid biosynthesis;Fatty acid metabolism;Lipid biosynthesis;Lipid metabolism;NAD;NADP;Oxidoreductase;Reference proteome;	;1.-.-.-;1.1.1.-;1.1.1.100;1.1.1.289;1.1.1.326;1.1.1.69;1.2.1.n2;	;K00019;K00046;K17742;K21837;	Unknown SUPERKINGDOM	Unknown KINGDOM	Unknown PHYLUM	Unknown CLASS	Unknown ORDER	Unknown FAMILY	Unknown GENUS	Unknown SPECIES	Unknown SUBSPECIES	11	12	20	0	7	22	45	33	20	8	0	34	11	0	2	10	37	5	13	14	0	15	14	12	17	35	6	10	0	13	15	0	10	38	10	0
Meta-Protein 220	BLAST_FTHS2_DESHY Formate--tetrahydrofolate ligase 2 OS=Desulfitobacterium hafniense (strain Y51) GN=fhs2 PE=3 SV=1_Q24ZZ8	ATP-binding;Complete proteome;Ligase;Nucleotide-binding;One-carbon metabolism;Reference proteome;	6.3.4.3;	K01938;	Unknown SUPERKINGDOM	Unknown KINGDOM	Unknown PHYLUM	Unknown CLASS	Unknown ORDER	Unknown FAMILY	Unknown GENUS	Unknown SPECIES	Unknown SUBSPECIES	104	23	10	4	28	34	45	24	27	35	11	36	13	27	16	22	4	16	7	4	0	4	7	0	26	24	2	0	0	35	0	0	28	43	8	0
Meta-Protein 1062	Metagenome unknown				Unknown SUPERKINGDOM	Unknown KINGDOM	Unknown PHYLUM	Unknown CLASS	Unknown ORDER	Unknown FAMILY	Unknown GENUS	Unknown SPECIES	Unknown SUBSPECIES	0	0	0	51	56	0	33	35	0	2	34	17	0	0	0	5	10	0	2	0	0	0	28	26	0	0	0	0	0	39	0	0	2	15	20	0
Meta-Protein 13133	Metagenome unknown				Unknown SUPERKINGDOM	Unknown KINGDOM	Unknown PHYLUM	Unknown CLASS	Unknown ORDER	Unknown FAMILY	Unknown GENUS	Unknown SPECIES	Unknown SUBSPECIES	8	5	3	5	10	4	6	7	5	6	5	4	8	7	4	3	3	2	4	10	48	2	9	8	11	7	18	14	19	1	4	23	10	6	47	31
Meta-Protein 13134	TGT_DEHMC Queuine tRNA-ribosyltransferase OS=Dehalococcoides mccartyi (strain CBDB1) GN=tgt PE=3 SV=1	Glycosyltransferase;Metal-binding;Queuosine biosynthesis;Transferase;tRNA processing;Zinc;	2.4.2.29;	K00773;	Bacteria	Unknown KINGDOM	Chloroflexi	Dehalococcoidia	Dehalococcoidales	Dehalococcoidaceae	Dehalococcoides	Dehalococcoides mccartyi	Dehalococcoides sp. CBDB1	8	5	3	5	10	5	6	7	5	6	5	4	8	7	4	3	3	1	3	10	48	2	10	8	11	7	17	16	20	1	4	22	9	6	46	27
Meta-Protein 570	Metagenome unknown				Unknown SUPERKINGDOM	Unknown KINGDOM	Unknown PHYLUM	Unknown CLASS	Unknown ORDER	Unknown FAMILY	Unknown GENUS	Unknown SPECIES	Unknown SUBSPECIES	0	20	0	0	0	0	29	12	35	0	0	21	14	6	0	3	1	0	0	27	0	0	0	0	0	46	29	0	0	0	0	64	0	69	31	0
Meta-Protein 1117	Metagenome unknown	3D-structure;Carbohydrate metabolism;Cell outer membrane;Complete proteome;Lipoprotein;Membrane;Palmitate;Signal;	;	;	Unknown SUPERKINGDOM	Unknown KINGDOM	Unknown PHYLUM	Unknown CLASS	Unknown ORDER	Unknown FAMILY	Unknown GENUS	Unknown SPECIES	Unknown SUBSPECIES	9	0	0	2	34	26	0	5	0	0	0	69	4	0	0	0	0	25	6	16	0	57	15	2	0	33	0	0	2	75	0	0	5	15	5	0
Meta-Protein 582	BLAST_CLPB_LACPL Chaperone protein ClpB OS=Lactobacillus plantarum (strain ATCC BAA-793 / NCIMB 8826 / WCFS1) GN=clpB PE=3 SV=1_Q88VX7	3D-structure;ATP-binding;Acetylation;Alternative initiation;Chaperone;Chloroplast;Coiled coil;Competence;Complete proteome;Cytoplasm;Direct protein sequencing;Metal-binding;Mitochondrion;Nucleotide-binding;Plastid;Reference proteome;Repeat;Repressor;Stress response;Transcription;Transcription regulation;Transit peptide;Virulence;Zinc;Zinc-finger;	;	;K03694;K03695;K03696;K03697;	Unknown SUPERKINGDOM	Unknown KINGDOM	Unknown PHYLUM	Unknown CLASS	Unknown ORDER	Unknown FAMILY	Unknown GENUS	Unknown SPECIES	Unknown SUBSPECIES	16	17	8	3	6	25	46	13	48	12	2	5	8	15	5	6	16	2	8	11	0	73	2	5	20	20	1	4	4	11	5	6	6	11	4	92
Meta-Protein 442	Metagenome unknown				Unknown SUPERKINGDOM	Unknown KINGDOM	Unknown PHYLUM	Unknown CLASS	Unknown ORDER	Unknown FAMILY	Unknown GENUS	Unknown SPECIES	Unknown SUBSPECIES	0	10	84	0	0	66	0	14	50	22	0	81	45	3	30	7	13	5	4	43	0	8	7	5	0	11	3	3	0	24	0	2	4	14	1	0
Meta-Protein 80	DPP4_HUMAN Dipeptidyl peptidase 4 OS=Homo sapiens GN=DPP4 PE=1 SV=2	3D-structure;Aminopeptidase;Cell adhesion;Cell junction;Cell membrane;Cell projection;Complete proteome;Direct protein sequencing;Disulfide bond;Glycoprotein;Hydrolase;Membrane;Protease;Receptor;Reference proteome;Secreted;Serine protease;Signal-anchor;Transmembrane;Transmembrane helix;	3.4.14.5;	K01278;	Eukaryota	Metazoa	Chordata	Mammalia	Unknown ORDER	Unknown FAMILY	Unknown GENUS	Unknown SPECIES	Unknown SUBSPECIES	11	0	3	7	18	14	13	17	5	11	5	10	9	15	4	1	0	9	12	8	39	20	18	40	1	11	7	25	33	2	11	34	2	0	15	8
Meta-Protein 2341	Metagenome unknown	Cell outer membrane;Complete proteome;Ion transport;Iron;Iron transport;Membrane;Receptor;Reference proteome;Signal;TonB box;Transmembrane;Transmembrane beta strand;Transport;	;	K19611;	Unknown SUPERKINGDOM	Unknown KINGDOM	Unknown PHYLUM	Unknown CLASS	Unknown ORDER	Unknown FAMILY	Unknown GENUS	Unknown SPECIES	Unknown SUBSPECIES	13	0	2	2	15	22	7	12	0	0	0	85	4	0	0	0	0	21	17	0	0	98	2	1	5	47	0	0	0	67	0	0	2	3	26	0
Meta-Protein 200	BLAST_ETFB_CLOPR Acryloyl-CoA reductase electron transfer subunit gamma OS=Clostridium propionicum GN=acrB PE=1 SV=1_G3KIM7	Complete proteome;Cytoplasm;Electron transport;FAD;Flavoprotein;NAD;Nitrogen fixation;Oxidoreductase;Reference proteome;Transport;	;1.3.1.108;	;K03521;	Unknown SUPERKINGDOM	Unknown KINGDOM	Unknown PHYLUM	Unknown CLASS	Unknown ORDER	Unknown FAMILY	Unknown GENUS	Unknown SPECIES	Unknown SUBSPECIES	0	17	17	0	0	39	22	23	76	17	0	13	21	13	2	6	21	6	10	3	1	25	4	9	4	38	2	0	0	1	2	11	5	44	15	0
Meta-Protein 144	BLAST_TPIS_BACV8 Triosephosphate isomerase OS=Bacteroides vulgatus (strain ATCC 8482 / DSM 1447 / JCM 5826 / NBRC 14291 / NCTC 11154) GN=tpiA PE=3 SV=1_A6KXL2	Complete proteome;Cytoplasm;Direct protein sequencing;Gluconeogenesis;Glycolysis;Isomerase;Pentose shunt;Reference proteome;	5.3.1.1;	;K01803;	Unknown SUPERKINGDOM	Unknown KINGDOM	Unknown PHYLUM	Unknown CLASS	Unknown ORDER	Unknown FAMILY	Unknown GENUS	Unknown SPECIES	Unknown SUBSPECIES	2	6	14	1	6	44	36	0	2	0	0	3	0	0	2	0	0	32	2	4	2	84	3	27	1	3	2	3	54	10	0	3	1	6	14	1
Meta-Protein 516	Metagenome unknown				Unknown SUPERKINGDOM	Unknown KINGDOM	Unknown PHYLUM	Unknown CLASS	Unknown ORDER	Unknown FAMILY	Unknown GENUS	Unknown SPECIES	Unknown SUBSPECIES	16	16	0	0	15	54	65	14	4	6	0	5	2	0	0	0	0	34	0	2	2	87	2	10	0	8	2	0	31	6	0	12	0	9	13	0
Meta-Protein 273	BLAST_NIFJ_ENTAG Pyruvate-flavodoxin oxidoreductase OS=Enterobacter agglomerans GN=nifJ PE=3 SV=3_P19543	4Fe-4S;Electron transport;Iron;Iron-sulfur;Metal-binding;Nitrogen fixation;Oxidoreductase;Plasmid;Repeat;Transport;	1.2.7.-;	;	Unknown SUPERKINGDOM	Unknown KINGDOM	Unknown PHYLUM	Unknown CLASS	Unknown ORDER	Unknown FAMILY	Unknown GENUS	Unknown SPECIES	Unknown SUBSPECIES	3	9	2	0	10	33	40	11	6	3	0	8	2	7	1	2	5	26	2	5	0	158	9	0	0	2	6	0	7	0	1	0	4	21	1	0
Meta-Protein 42	BLAST_RS2_DESRM 30S ribosomal protein S2 OS=Desulfotomaculum reducens (strain MI-1) GN=rpsB PE=3 SV=1_A4J5Z3	3D-structure;Coiled coil;Complete proteome;Cyanelle;Direct protein sequencing;Plastid;RNA-binding;Reference proteome;Ribonucleoprotein;Ribosomal protein;rRNA-binding;	;	;K02967;	Unknown SUPERKINGDOM	Unknown KINGDOM	Unknown PHYLUM	Unknown CLASS	Unknown ORDER	Unknown FAMILY	Unknown GENUS	Unknown SPECIES	Unknown SUBSPECIES	12	26	20	4	2	29	14	31	34	39	7	26	21	17	3	9	16	8	16	3	0	5	8	4	7	7	6	23	3	2	9	7	8	39	2	4
Meta-Protein 373	LYSC_PANTR Lysozyme C OS=Pan troglodytes GN=LYZ PE=2 SV=1	3D-structure;Amyloid;Amyloidosis;Antibiotic;Antimicrobial;Bacteriolytic enzyme;Complete proteome;Direct protein sequencing;Disease mutation;Disulfide bond;Glycosidase;Hydrolase;Polymorphism;Reference proteome;Secreted;Signal;	3.2.1.17;	;K13915;	Eukaryota	Metazoa	Chordata	Unknown CLASS	Unknown ORDER	Unknown FAMILY	Unknown GENUS	Unknown SPECIES	Unknown SUBSPECIES	13	21	12	4	18	9	29	12	8	17	8	5	12	5	4	0	8	11	13	2	29	9	21	6	18	6	4	2	21	0	28	5	73	12	21	6
Meta-Protein 415	BLAST_ACDS_CLOAB Acyl-CoA dehydrogenase, short-chain specific OS=Clostridium acetobutylicum (strain ATCC 824 / DSM 792 / JCM 1419 / LMG 5710 / VKM B-1787) GN=bcd PE=1 SV=1_P52042	Complete proteome;FAD;Flavoprotein;Oxidoreductase;Reference proteome;	1.3.8.1;	K00248;	Unknown SUPERKINGDOM	Unknown KINGDOM	Unknown PHYLUM	Unknown CLASS	Unknown ORDER	Unknown FAMILY	Unknown GENUS	Unknown SPECIES	Unknown SUBSPECIES	24	26	11	4	36	59	29	24	40	33	2	21	20	17	2	8	21	3	11	1	0	14	0	6	0	26	0	0	0	0	0	33	3	25	29	0
Meta-Protein 1092	BLAST_SUSC_BACTN TonB-dependent receptor SusC OS=Bacteroides thetaiotaomicron (strain ATCC 29148 / DSM 2079 / NCTC 10582 / E50 / VPI-5482) GN=susC PE=1 SV=1_Q8A1G1	3D-structure;Carbohydrate metabolism;Cell outer membrane;Complete proteome;Cytoplasm;Hydrolase;Ion transport;Iron;Iron transport;Membrane;Receptor;Reference proteome;Signal;TonB box;Transmembrane;Transmembrane beta strand;Transport;	;3.1.1.29;	K01056;K19611;K21573;	Unknown SUPERKINGDOM	Unknown KINGDOM	Unknown PHYLUM	Unknown CLASS	Unknown ORDER	Unknown FAMILY	Unknown GENUS	Unknown SPECIES	Unknown SUBSPECIES	25	1	1	4	69	2	67	4	2	2	3	21	1	9	5	6	4	6	8	4	5	11	3	1	16	12	0	3	3	10	2	0	24	7	3	0
Meta-Protein 668	BLAST_SCPA_ECOLI Methylmalonyl-CoA mutase OS=Escherichia coli (strain K12) GN=scpA PE=1 SV=2_P27253	3D-structure;Acetylation;Cobalamin;Cobalt;Complete proteome;Direct protein sequencing;Disease mutation;Isomerase;Metal-binding;Mitochondrion;Phosphoprotein;Plasmid;Polymorphism;Reference proteome;Transit peptide;	5.4.99.2;	;K01847;	Unknown SUPERKINGDOM	Unknown KINGDOM	Unknown PHYLUM	Unknown CLASS	Unknown ORDER	Unknown FAMILY	Unknown GENUS	Unknown SPECIES	Unknown SUBSPECIES	2	10	18	0	151	6	57	0	2	0	2	6	0	3	0	0	0	42	6	8	0	39	5	10	0	12	0	1	0	54	0	0	37	12	2	2
Meta-Protein 292	OVAL_CHICK Ovalbumin OS=Gallus gallus GN=SERPINB14 PE=1 SV=2	3D-structure;Acetylation;Allergen;Calcium;Complete proteome;Direct protein sequencing;Disulfide bond;Glycoprotein;Metal-binding;Phosphoprotein;Polymorphism;Reference proteome;Secreted;Signal;	;	;	Eukaryota	Metazoa	Chordata	Aves	Galliformes	Phasianidae	Unknown GENUS	Unknown SPECIES	Unknown SUBSPECIES	0	11	57	0	0	4	0	0	0	0	0	0	0	0	0	0	0	0	0	11	0	17	0	27	60	6	0	4	0	3	8	0	0	7	1	34
Meta-Protein 265	BLAST_THIL_ALLVD Acetyl-CoA acetyltransferase OS=Allochromatium vinosum (strain ATCC 17899 / DSM 180 / NBRC 103801 / NCIMB 10441 / D) GN=phaA PE=3 SV=2_P45369	Acyltransferase;Complete proteome;Cytoplasm;PHB biosynthesis;Reference proteome;Transferase;	2.3.1.9;	;K00626;	Bacteria	Unknown KINGDOM	Unknown PHYLUM	Unknown CLASS	Unknown ORDER	Unknown FAMILY	Unknown GENUS	Unknown SPECIES	Unknown SUBSPECIES	0	16	21	2	13	46	51	48	55	24	0	16	15	15	3	12	14	10	2	4	0	27	0	23	0	16	1	0	0	0	0	22	2	22	14	0
Meta-Protein 829	Metagenome unknown	3D-structure;Carbohydrate metabolism;Cell wall;Cellulose degradation;Complete proteome;Polysaccharide degradation;Reference proteome;Repeat;S-layer;Secreted;Signal;	;	;	Unknown SUPERKINGDOM	Unknown KINGDOM	Unknown PHYLUM	Unknown CLASS	Unknown ORDER	Unknown FAMILY	Unknown GENUS	Unknown SPECIES	Unknown SUBSPECIES	5	12	15	4	6	18	4	20	5	24	7	13	0	3	0	2	3	17	1	30	8	5	5	33	4	3	3	7	6	25	5	3	7	0	7	4
Meta-Protein 569	BLAST_SERC_BACV8 Phosphoserine aminotransferase OS=Bacteroides vulgatus (strain ATCC 8482 / DSM 1447 / JCM 5826 / NBRC 14291 / NCTC 11154) GN=serC PE=3 SV=1_A6L5A6	Amino-acid biosynthesis;Aminotransferase;Complete proteome;Cytoplasm;Pyridoxal phosphate;Pyridoxine biosynthesis;Reference proteome;Serine biosynthesis;Transferase;	2.6.1.52;	K00831;	Unknown SUPERKINGDOM	Unknown KINGDOM	Unknown PHYLUM	Unknown CLASS	Unknown ORDER	Unknown FAMILY	Unknown GENUS	Unknown SPECIES	Unknown SUBSPECIES	13	2	2	0	21	15	58	6	4	3	0	14	0	9	1	3	0	18	0	0	0	47	8	14	36	10	1	2	11	24	0	14	21	33	13	0
Meta-Protein 330	BLAST_ACDS_CLOAB Acyl-CoA dehydrogenase, short-chain specific OS=Clostridium acetobutylicum (strain ATCC 824 / DSM 792 / JCM 1419 / LMG 5710 / VKM B-1787) GN=bcd PE=1 SV=1_P52042	Complete proteome;FAD;Flavoprotein;Oxidoreductase;Reference proteome;	1.3.8.1;	K00248;	Unknown SUPERKINGDOM	Unknown KINGDOM	Unknown PHYLUM	Unknown CLASS	Unknown ORDER	Unknown FAMILY	Unknown GENUS	Unknown SPECIES	Unknown SUBSPECIES	9	26	9	20	25	20	28	20	30	26	4	26	11	22	9	11	21	10	10	20	0	0	15	4	0	32	10	0	0	6	0	15	19	14	15	0
Meta-Protein 635	BLAST_DPS_SHISS DNA protection during starvation protein OS=Shigella sonnei (strain Ss046) GN=dps PE=3 SV=3_Q3Z3X3	3D-structure;Complete proteome;Cytoplasm;DNA condensation;DNA-binding;Direct protein sequencing;Iron;Iron storage;Metal-binding;Oxidoreductase;Reference proteome;	1.16.-.-;	;K04047;	Unknown SUPERKINGDOM	Unknown KINGDOM	Unknown PHYLUM	Unknown CLASS	Unknown ORDER	Unknown FAMILY	Unknown GENUS	Unknown SPECIES	Unknown SUBSPECIES	0	0	0	0	0	1	0	0	0	0	0	0	0	0	0	0	0	0	0	0	18	106	4	0	3	0	0	0	11	36	0	0	2	0	0	144
Meta-Protein 2420	CASB_SHEEP Beta-casein OS=Ovis aries GN=CSN2 PE=1 SV=3	Antioxidant;Complete proteome;Direct protein sequencing;Hypotensive agent;Metalloenzyme inhibitor;Metalloprotease inhibitor;Milk protein;Phosphoprotein;Polymorphism;Protease inhibitor;Reference proteome;Secreted;Signal;	;	;K17107;	Eukaryota	Metazoa	Chordata	Mammalia	Unknown ORDER	Bovidae	Unknown GENUS	Unknown SPECIES	Unknown SUBSPECIES	0	1	0	0	0	0	0	0	0	10	10	0	0	0	0	0	0	0	0	0	79	27	0	0	25	0	11	0	0	17	31	0	8	0	0	0
Meta-Protein 656	BLAST_GATM_XENLA Glycine amidinotransferase, mitochondrial OS=Xenopus laevis GN=gatm PE=2 SV=2_Q9IAJ6	Acetylation;Complete proteome;Direct protein sequencing;Membrane;Mitochondrion;Mitochondrion inner membrane;Phosphoprotein;Reference proteome;Transferase;Transit peptide;	2.1.4.1;	K00613;	Unknown SUPERKINGDOM	Unknown KINGDOM	Unknown PHYLUM	Unknown CLASS	Unknown ORDER	Unknown FAMILY	Unknown GENUS	Unknown SPECIES	Unknown SUBSPECIES	22	8	0	1	11	28	24	19	6	7	0	23	0	0	0	4	7	0	2	1	0	13	3	14	24	31	4	11	0	18	0	13	4	15	7	0
Meta-Protein 455	BLAST_G3P_CLOPA Glyceraldehyde-3-phosphate dehydrogenase OS=Clostridium pasteurianum GN=gap PE=1 SV=1_Q59309	Complete proteome;Cytoplasm;Direct protein sequencing;Glycolysis;NAD;Nucleotide-binding;Oxidoreductase;Reference proteome;	1.2.1.12;	;K00134;	Unknown SUPERKINGDOM	Unknown KINGDOM	Unknown PHYLUM	Unknown CLASS	Unknown ORDER	Unknown FAMILY	Unknown GENUS	Unknown SPECIES	Unknown SUBSPECIES	29	19	18	5	20	16	20	18	26	23	8	17	6	15	12	15	11	12	13	18	13	10	9	0	4	25	4	12	0	9	8	5	12	22	4	0
Meta-Protein 152	BLAST_G6PI_TREDE Glucose-6-phosphate isomerase OS=Treponema denticola (strain ATCC 35405 / CIP 103919 / DSM 14222) GN=pgi PE=3 SV=1_Q73K18	Complete proteome;Cytoplasm;Gluconeogenesis;Glycolysis;Isomerase;Reference proteome;	5.3.1.9;	K01810;	Unknown SUPERKINGDOM	Unknown KINGDOM	Unknown PHYLUM	Unknown CLASS	Unknown ORDER	Unknown FAMILY	Unknown GENUS	Unknown SPECIES	Unknown SUBSPECIES	11	8	14	6	2	15	27	25	47	19	0	26	7	17	2	7	5	1	0	6	0	0	1	0	0	39	4	1	0	35	0	13	13	30	10	0
Meta-Protein 547	BLAST_RL11_LACP7 50S ribosomal protein L11 OS=Lachnoclostridium phytofermentans (strain ATCC 700394 / DSM 18823 / ISDg) GN=rplK PE=3 SV=1_A9KJM0	3D-structure;Complete proteome;Direct protein sequencing;Methylation;RNA-binding;Reference proteome;Ribonucleoprotein;Ribosomal protein;rRNA-binding;	;	;K02867;	Unknown SUPERKINGDOM	Unknown KINGDOM	Unknown PHYLUM	Unknown CLASS	Unknown ORDER	Unknown FAMILY	Unknown GENUS	Unknown SPECIES	Unknown SUBSPECIES	20	12	0	5	4	13	14	42	27	21	3	32	9	3	3	1	0	0	0	3	8	1	8	0	18	39	4	5	0	9	10	2	7	3	11	0
Meta-Protein 12633	11S3_HELAN 11S globulin seed storage protein G3 OS=Helianthus annuus GN=HAG3 PE=3 SV=1	Disulfide bond;Seed storage protein;Signal;Storage protein;	;	;	Eukaryota	Viridiplantae	Streptophyta	Unknown CLASS	Asterales	Asteraceae	Helianthus	Helianthus annuus	Unknown SUBSPECIES	23	16	43	0	0	30	0	0	0	10	30	0	0	0	0	12	0	15	16	1	0	15	0	47	0	0	0	0	0	0	0	0	52	38	4	0
Meta-Protein 1043	ENO_BIFLS Enolase OS=Bifidobacterium longum subsp. infantis (strain ATCC 15697 / DSM 20088 / JCM 1222 / NCTC 11817 / S12) GN=eno PE=3 SV=1	Complete proteome;Cytoplasm;Glycolysis;Lyase;Magnesium;Metal-binding;Reference proteome;Secreted;	4.2.1.11;	K01689;	Unknown SUPERKINGDOM	Unknown KINGDOM	Unknown PHYLUM	Unknown CLASS	Unknown ORDER	Unknown FAMILY	Unknown GENUS	Unknown SPECIES	Unknown SUBSPECIES	0	52	14	9	26	22	103	16	55	11	0	0	35	48	0	4	5	2	2	11	0	0	42	0	10	21	19	7	0	0	2	38	34	3	31	0
Meta-Protein 1038	Metagenome unknown				Unknown SUPERKINGDOM	Unknown KINGDOM	Unknown PHYLUM	Unknown CLASS	Unknown ORDER	Unknown FAMILY	Unknown GENUS	Unknown SPECIES	Unknown SUBSPECIES	0	0	0	10	2	0	56	83	0	0	0	1	0	0	0	0	0	0	0	0	0	0	0	0	0	0	0	0	0	0	0	3	0	74	0	0
Meta-Protein 169	BLAST_PFLB_ECOLI Formate acetyltransferase 1 OS=Escherichia coli (strain K12) GN=pflB PE=1 SV=2_P09373	3D-structure;Acetylation;Acyltransferase;Carbohydrate metabolism;Complete proteome;Cytoplasm;Direct protein sequencing;Glucose metabolism;Organic radical;Reference proteome;Transferase;	;2.3.1.54;	K00656;K06866;	Unknown SUPERKINGDOM	Unknown KINGDOM	Unknown PHYLUM	Unknown CLASS	Unknown ORDER	Unknown FAMILY	Unknown GENUS	Unknown SPECIES	Unknown SUBSPECIES	0	0	0	2	0	0	0	0	1	0	0	0	0	0	0	0	0	0	0	0	4	182	0	0	1	0	1	0	1	0	0	0	0	0	0	174
Meta-Protein 493	BLAST_FTN_BACF6 Bacterial non-heme ferritin OS=Bacteroides fragilis (strain 638R) GN=ftnA PE=2 SV=1_E1WS50	Complete proteome;Direct protein sequencing;Iron;Iron storage;Metal-binding;Oxidoreductase;	1.16.3.2;	K02217;	Unknown SUPERKINGDOM	Unknown KINGDOM	Unknown PHYLUM	Unknown CLASS	Unknown ORDER	Unknown FAMILY	Unknown GENUS	Unknown SPECIES	Unknown SUBSPECIES	21	0	1	3	19	0	6	4	4	0	2	47	7	0	0	7	2	0	19	13	0	0	24	4	24	20	3	7	10	41	0	8	27	9	8	0
Meta-Protein 257	PGK_ECO57 Phosphoglycerate kinase OS=Escherichia coli O157:H7 GN=pgk PE=3 SV=3	3D-structure;ATP-binding;Acetylation;Complete proteome;Cytoplasm;Direct protein sequencing;Glycolysis;Kinase;Nucleotide-binding;Reference proteome;Transferase;	2.7.2.3;	;K00927;	Unknown SUPERKINGDOM	Unknown KINGDOM	Unknown PHYLUM	Unknown CLASS	Unknown ORDER	Unknown FAMILY	Unknown GENUS	Unknown SPECIES	Unknown SUBSPECIES	0	0	0	0	0	0	0	0	0	0	0	0	0	1	0	0	0	0	0	0	1	135	0	0	1	0	0	0	1	0	1	0	0	0	0	67
Meta-Protein 24284	Metagenome unknown				Unknown SUPERKINGDOM	Unknown KINGDOM	Unknown PHYLUM	Unknown CLASS	Unknown ORDER	Unknown FAMILY	Unknown GENUS	Unknown SPECIES	Unknown SUBSPECIES	0	0	0	0	0	0	0	0	0	0	0	0	0	0	0	0	0	0	0	8	26	8	35	46	17	3	20	28	25	17	0	3	12	0	8	13
Meta-Protein 16805	Metagenome unknown				Unknown SUPERKINGDOM	Unknown KINGDOM	Unknown PHYLUM	Unknown CLASS	Unknown ORDER	Unknown FAMILY	Unknown GENUS	Unknown SPECIES	Unknown SUBSPECIES	3	9	4	12	9	11	9	6	4	3	1	4	7	5	4	4	6	3	5	11	13	8	11	16	10	14	11	10	5	5	12	9	13	8	9	14
Meta-Protein 510	BLAST_MSME_BACSU Putative binding protein MsmE OS=Bacillus subtilis (strain 168) GN=msmE PE=1 SV=1_O34335	3D-structure;Cell membrane;Complete proteome;Lipoprotein;Membrane;Palmitate;Reference proteome;Signal;Transport;	;	K10117;	Unknown SUPERKINGDOM	Unknown KINGDOM	Unknown PHYLUM	Unknown CLASS	Unknown ORDER	Unknown FAMILY	Unknown GENUS	Unknown SPECIES	Unknown SUBSPECIES	9	7	0	15	21	5	4	0	15	0	0	15	0	0	0	1	0	0	0	0	0	2	1	0	6	47	0	2	0	80	0	2	2	39	28	0
Meta-Protein 4459	Metagenome unknown				Unknown SUPERKINGDOM	Unknown KINGDOM	Unknown PHYLUM	Unknown CLASS	Unknown ORDER	Unknown FAMILY	Unknown GENUS	Unknown SPECIES	Unknown SUBSPECIES	0	0	0	0	0	14	19	0	0	0	0	0	0	0	0	0	0	14	0	0	0	182	0	0	0	0	0	0	97	361	0	8	0	0	0	0
Meta-Protein 309	BLAST_EXBB_HAEIN Biopolymer transport protein ExbB OS=Haemophilus influenzae (strain ATCC 51907 / DSM 11121 / KW20 / Rd) GN=exbB PE=3 SV=1_P43008	Cell inner membrane;Cell membrane;Complete proteome;Membrane;Protein transport;Reference proteome;Transmembrane;Transmembrane helix;Transport;	;	;K03561;	Unknown SUPERKINGDOM	Unknown KINGDOM	Unknown PHYLUM	Unknown CLASS	Unknown ORDER	Unknown FAMILY	Unknown GENUS	Unknown SPECIES	Unknown SUBSPECIES	11	14	9	7	13	2	8	7	0	0	2	17	0	5	9	20	18	0	21	7	0	0	17	8	48	2	8	0	11	9	0	11	21	38	4	10
Meta-Protein 3959	ALL12_ARAHY Allergen Ara h 1, clone P41B OS=Arachis hypogaea PE=1 SV=1	3D-structure;Allergen;Direct protein sequencing;Glycoprotein;Signal;	;	;	Eukaryota	Viridiplantae	Streptophyta	Unknown CLASS	Fabales	Fabaceae	Arachis	Arachis hypogaea	Unknown SUBSPECIES	7	0	87	0	0	0	0	0	0	0	480	0	0	0	0	0	0	0	0	0	0	0	0	0	0	0	2	0	0	0	156	0	0	0	0	0
Meta-Protein 2548	Metagenome unknown	Cell outer membrane;Complete proteome;Lipoprotein;Membrane;Palmitate;Reference proteome;Signal;	;	;K03640;	Unknown SUPERKINGDOM	Unknown KINGDOM	Unknown PHYLUM	Unknown CLASS	Unknown ORDER	Unknown FAMILY	Unknown GENUS	Unknown SPECIES	Unknown SUBSPECIES	0	1	0	4	2	0	0	9	2	0	0	36	0	0	6	13	4	1	2	1	0	0	38	0	20	28	6	9	36	13	1	8	30	31	10	5
Meta-Protein 233	HBB_CALGO Hemoglobin subunit beta OS=Callimico goeldii GN=HBB PE=2 SV=3	3D-structure;Acetylation;Complete proteome;Congenital dyserythropoietic anemia;Direct protein sequencing;Disease mutation;Glycation;Glycoprotein;Heme;Hereditary hemolytic anemia;Hypotensive agent;Iron;Metal-binding;Methylation;Oxygen transport;Phosphoprotein;Polymorphism;Pyruvate;Reference proteome;S-nitrosylation;Transport;Vasoactive;	;	;K13823;K13824;K13825;K16151;	Unknown SUPERKINGDOM	Unknown KINGDOM	Unknown PHYLUM	Unknown CLASS	Unknown ORDER	Unknown FAMILY	Unknown GENUS	Unknown SPECIES	Unknown SUBSPECIES	0	0	1	0	0	0	0	0	0	0	0	0	0	0	0	0	1	0	0	0	0	0	2	80	0	1	0	0	0	0	2	0	2	0	0	0
Meta-Protein 2633	Metagenome unknown	Carbohydrate metabolism;Cell outer membrane;Complete proteome;Membrane;Receptor;Reference proteome;Signal;TonB box;Transmembrane;Transmembrane beta strand;Transport;	;	K21573;	Unknown SUPERKINGDOM	Unknown KINGDOM	Unknown PHYLUM	Unknown CLASS	Unknown ORDER	Unknown FAMILY	Unknown GENUS	Unknown SPECIES	Unknown SUBSPECIES	33	2	0	9	0	0	0	0	0	0	0	8	0	0	11	17	0	0	9	0	0	0	32	0	87	0	2	10	51	16	0	5	22	7	0	30
Meta-Protein 392	BLAST_MALX_STRR6 Maltose/maltodextrin-binding protein OS=Streptococcus pneumoniae (strain ATCC BAA-255 / R6) GN=malX PE=2 SV=1_P59214	3D-structure;Cell membrane;Complete proteome;Direct protein sequencing;Lipoprotein;Membrane;Palmitate;Periplasm;Reference proteome;Signal;Sugar transport;Transport;	;	K10108;K15770;	Unknown SUPERKINGDOM	Unknown KINGDOM	Unknown PHYLUM	Unknown CLASS	Unknown ORDER	Unknown FAMILY	Unknown GENUS	Unknown SPECIES	Unknown SUBSPECIES	0	12	11	7	0	14	0	0	90	46	1	55	18	36	0	7	19	9	1	9	0	1	0	0	0	18	32	0	0	0	0	0	0	0	0	0
Meta-Protein 1168	BLAST_MOP_DESGI Aldehyde oxidoreductase OS=Desulfovibrio gigas GN=mop PE=1 SV=1_Q46509	2Fe-2S;3D-structure;FAD;Flavoprotein;Iron;Iron-sulfur;Metal-binding;Molybdenum;NAD;Oxidoreductase;	1.2.99.7;	;	Unknown SUPERKINGDOM	Unknown KINGDOM	Unknown PHYLUM	Unknown CLASS	Unknown ORDER	Unknown FAMILY	Unknown GENUS	Unknown SPECIES	Unknown SUBSPECIES	38	22	2	5	30	12	26	10	9	4	1	16	8	16	3	6	10	11	7	6	0	0	22	0	15	28	0	0	0	15	0	21	4	39	7	0
Meta-Protein 1115	BLAST_IUTA_KLEPN Ferric aerobactin receptor OS=Klebsiella pneumoniae GN=iutA PE=1 SV=1_Q6U607	3D-structure;Carbohydrate metabolism;Cell outer membrane;Complete proteome;Ion transport;Iron;Iron transport;Membrane;Plasmid;Receptor;Reference proteome;Signal;TonB box;Transmembrane;Transmembrane beta strand;Transport;	;	;K02014;K19611;K21573;	Unknown SUPERKINGDOM	Unknown KINGDOM	Unknown PHYLUM	Unknown CLASS	Unknown ORDER	Unknown FAMILY	Unknown GENUS	Unknown SPECIES	Unknown SUBSPECIES	27	3	1	5	1	0	0	1	0	0	4	8	0	10	9	46	4	0	8	0	0	0	8	0	48	0	5	2	31	13	0	13	33	30	13	24
Meta-Protein 256	IAA1_WHEAT Alpha-amylase inhibitor 0.19 OS=Triticum aestivum PE=1 SV=1	3D-structure;Allergen;Alpha-amylase inhibitor;Complete proteome;Direct protein sequencing;Disulfide bond;Reference proteome;Secreted;	;	;	Eukaryota	Viridiplantae	Streptophyta	Liliopsida	Poales	Poaceae	Triticum	Triticum aestivum	Unknown SUBSPECIES	2	22	2	13	18	35	24	1	2	62	22	0	0	0	1	0	0	17	7	3	0	0	0	7	8	0	2	6	0	0	26	27	24	10	0	13
Meta-Protein 267	IGG1_HUMAN Immunoglobulin gamma-1 heavy chain OS=Homo sapiens PE=1 SV=1	3D-structure;Adaptive immunity;Cell membrane;Chromosomal rearrangement;Complete proteome;Direct protein sequencing;Disulfide bond;Glycoprotein;Immunity;Immunoglobulin C region;Immunoglobulin V region;Immunoglobulin domain;Membrane;Polymorphism;Pyrrolidone carboxylic acid;Reference proteome;Repeat;Secreted;Signal;	;	;	Unknown SUPERKINGDOM	Unknown KINGDOM	Unknown PHYLUM	Unknown CLASS	Unknown ORDER	Unknown FAMILY	Unknown GENUS	Unknown SPECIES	Unknown SUBSPECIES	13	2	0	2	0	0	4	2	3	0	0	2	0	1	7	2	0	0	1	7	66	0	8	89	19	0	6	13	3	5	131	5	29	0	4	17
Meta-Protein 963	BLAST_TAL_MYCS2 Transaldolase OS=Mycobacterium smegmatis (strain ATCC 700084 / mc(2)155) GN=tal PE=1 SV=1_A0QWX9	Complete proteome;Cytoplasm;Fatty acid metabolism;Isopeptide bond;Lipid metabolism;Mitochondrion;NAD;Oxidoreductase;Pentose shunt;Reference proteome;Schiff base;Transferase;Ubl conjugation;	1.1.1.35;2.2.1.2;	K00022;K00616;	Unknown SUPERKINGDOM	Unknown KINGDOM	Unknown PHYLUM	Unknown CLASS	Unknown ORDER	Unknown FAMILY	Unknown GENUS	Unknown SPECIES	Unknown SUBSPECIES	0	35	15	4	47	10	101	6	43	2	0	0	19	41	0	1	2	6	3	2	0	3	39	0	20	8	13	4	0	0	0	17	48	1	23	0
Meta-Protein 225	CEL_HUMAN Bile salt-activated lipase OS=Homo sapiens GN=CEL PE=1 SV=3	3D-structure;Alternative splicing;Complete proteome;Diabetes mellitus;Direct protein sequencing;Disulfide bond;Glycoprotein;Hydrolase;Lipid degradation;Lipid metabolism;Reference proteome;Repeat;Secreted;Serine esterase;Signal;	3.1.1.13;3.1.1.3;	;K12298;	Eukaryota	Metazoa	Chordata	Mammalia	Unknown ORDER	Unknown FAMILY	Unknown GENUS	Unknown SPECIES	Unknown SUBSPECIES	7	4	0	2	10	8	17	26	0	2	0	0	1	0	2	0	0	3	2	0	68	27	0	0	9	9	0	0	0	6	119	25	0	0	4	1
Meta-Protein 17525	BLAST_PDUB_SALTY Propanediol utilization protein PduB OS=Salmonella typhimurium (strain LT2 / SGSC1412 / ATCC 700720) GN=pduB PE=2 SV=2_P37449	Complete proteome;Reference proteome;	;	;	Bacteria	Unknown KINGDOM	Proteobacteria	Gammaproteobacteria	Enterobacteriales	Enterobacteriaceae	Salmonella	Salmonella enterica subsp. enterica serovar Typhimurium str. LT2	Salmonella enterica subsp. enterica	20	31	23	4	36	13	24	22	14	14	4	19	1	14	1	5	5	2	2	1	0	4	0	0	0	20	0	0	0	0	0	4	20	17	3	0
Meta-Protein 369	ACY1A_RAT Aminoacylase-1A OS=Rattus norvegicus GN=Acy1a PE=1 SV=1	3D-structure;Acetylation;Alternative splicing;Complete proteome;Cytoplasm;Direct protein sequencing;Disease mutation;Glycoprotein;Hydrolase;Membrane;Metal-binding;Phosphoprotein;Polymorphism;Reference proteome;Signal-anchor;Transmembrane;Transmembrane helix;Zinc;	3.-.-.-;3.5.1.14;	;K13706;K14677;	Eukaryota	Metazoa	Chordata	Mammalia	Unknown ORDER	Unknown FAMILY	Unknown GENUS	Unknown SPECIES	Unknown SUBSPECIES	0	0	2	0	0	8	4	0	0	1	0	3	0	0	0	0	0	2	1	14	2	26	0	3	6	0	1	0	38	51	14	3	0	0	0	0
Meta-Protein 3826	BLAST_OMP40_PORGI Outer membrane protein 40 OS=Porphyromonas gingivalis (strain ATCC BAA-308 / W83) GN=PG_0694 PE=1 SV=1_Q9S3R8	Cell outer membrane;Complete proteome;Direct protein sequencing;Disulfide bond;Membrane;Pyrrolidone carboxylic acid;Reference proteome;Signal;Transmembrane;Transmembrane beta strand;	;	;	Bacteria	Unknown KINGDOM	Bacteroidetes	Bacteroidia	Bacteroidales	Porphyromonadaceae	Porphyromonas	Porphyromonas gingivalis	Porphyromonas gingivalis W83	0	0	0	0	27	117	63	0	0	0	0	0	0	0	0	0	0	65	0	0	0	84	0	52	0	0	0	0	29	29	0	18	0	0	0	0
Meta-Protein 722	BLAST_ACKA_AGARV Acetate kinase OS=Agathobacter rectalis (strain ATCC 33656 / DSM 3377 / JCM 17463 / KCTC 5835 / VPI 0990) GN=ackA PE=3 SV=1_C4Z917	3D-structure;ATP-binding;Complete proteome;Cytoplasm;Direct protein sequencing;Kinase;Magnesium;Metal-binding;Nucleotide-binding;Reference proteome;Transferase;	2.7.2.1;	K00925;	Unknown SUPERKINGDOM	Unknown KINGDOM	Unknown PHYLUM	Unknown CLASS	Unknown ORDER	Unknown FAMILY	Unknown GENUS	Unknown SPECIES	Unknown SUBSPECIES	38	10	2	7	19	15	29	9	25	13	2	18	6	15	8	7	11	1	0	4	0	27	14	0	13	16	2	0	4	17	1	8	7	20	4	21
Meta-Protein 378	BLAST_RUBY_PORGI Rubrerythrin OS=Porphyromonas gingivalis (strain ATCC BAA-308 / W83) GN=rbr PE=2 SV=1_Q9AGG3	3D-structure;Complete proteome;Cytoplasm;Direct protein sequencing;Electron transport;Iron;Metal-binding;NAD;Oxidoreductase;Peroxidase;Reference proteome;Transport;Zinc;	;1.11.1.1;	;	Unknown SUPERKINGDOM	Unknown KINGDOM	Unknown PHYLUM	Unknown CLASS	Unknown ORDER	Unknown FAMILY	Unknown GENUS	Unknown SPECIES	Unknown SUBSPECIES	12	4	10	5	0	0	0	0	6	0	0	16	3	5	0	2	0	0	3	5	0	0	13	0	0	8	1	11	3	17	0	8	51	9	1	9
Meta-Protein 953	BLAST_SLPA_DEIRA S-layer protein SlpA OS=Deinococcus radiodurans (strain ATCC 13939 / DSM 20539 / JCM 16871 / LMG 4051 / NBRC 15346 / NCIMB 9279 / R1 / VKM B-1422) GN=slpA PE=1 SV=1_Q9RRB6	3D-structure;Cell wall;Complete proteome;Disulfide bond;Reference proteome;Repeat;S-layer;Secreted;Signal;	;	;	Unknown SUPERKINGDOM	Unknown KINGDOM	Unknown PHYLUM	Unknown CLASS	Unknown ORDER	Unknown FAMILY	Unknown GENUS	Unknown SPECIES	Unknown SUBSPECIES	0	0	0	2	23	34	0	4	0	0	11	0	4	4	0	9	0	4	2	13	0	13	11	50	7	0	0	0	0	0	0	29	63	0	12	0
Meta-Protein 1024	TITIN_HUMAN Titin OS=Homo sapiens GN=TTN PE=1 SV=4	3D-structure;ATP-binding;Alternative splicing;Calcium;Calmodulin-binding;Cardiomyopathy;Coiled coil;Complete proteome;Cytoplasm;Direct protein sequencing;Disease mutation;Disulfide bond;Immunoglobulin domain;Kelch repeat;Kinase;Limb-girdle muscular dystrophy;Magnesium;Metal-binding;Methylation;Nucleotide-binding;Nucleus;Phosphoprotein;Polymorphism;Reference proteome;Repeat;Serine/threonine-protei…	2.7.11.1;	;K00907;K12567;	Unknown SUPERKINGDOM	Unknown KINGDOM	Unknown PHYLUM	Unknown CLASS	Unknown ORDER	Unknown FAMILY	Unknown GENUS	Unknown SPECIES	Unknown SUBSPECIES	2	0	0	4	1	0	6	1	142	1	1	0	0	2	0	15	4	0	0	1	2	1	0	2	0	0	89	21	0	23	4	2	0	0	3	0
Meta-Protein 310	BLAST_FRCB_RHIML Fructose import binding protein FrcB OS=Rhizobium meliloti GN=frcB PE=1 SV=1_Q9F9B2	3D-structure;Chemotaxis;Complete proteome;Direct protein sequencing;Periplasm;Reference proteome;Signal;Sugar transport;Transport;	;	;K10439;	Unknown SUPERKINGDOM	Unknown KINGDOM	Unknown PHYLUM	Unknown CLASS	Unknown ORDER	Unknown FAMILY	Unknown GENUS	Unknown SPECIES	Unknown SUBSPECIES	4	24	8	3	2	10	6	6	17	18	6	14	7	14	4	17	4	4	4	9	0	2	13	0	10	26	2	2	1	12	0	3	2	25	2	0
Meta-Protein 921	NEP_RAT Neprilysin OS=Rattus norvegicus GN=Mme PE=1 SV=2	3D-structure;Cell membrane;Charcot-Marie-Tooth disease;Complete proteome;Direct protein sequencing;Disease mutation;Disulfide bond;Glycoprotein;Hydrolase;Lipoprotein;Membrane;Metal-binding;Metalloprotease;Myristate;Neurodegeneration;Neuropathy;Phosphoprotein;Protease;Reference proteome;Signal-anchor;Spinocerebellar ataxia;Transmembrane;Transmembrane helix;Zinc;	3.4.24.11;	K01389;	Unknown SUPERKINGDOM	Unknown KINGDOM	Unknown PHYLUM	Unknown CLASS	Unknown ORDER	Unknown FAMILY	Unknown GENUS	Unknown SPECIES	Unknown SUBSPECIES	40	0	0	2	6	17	12	3	4	14	0	8	6	0	0	0	8	1	4	0	10	5	25	14	0	0	21	12	0	0	7	27	0	0	9	0
Meta-Protein 3437	Metagenome unknown	3D-structure;Acetylation;Complete proteome;Cytoplasm;Decarboxylase;Direct protein sequencing;Lyase;Membrane;Pyridoxal phosphate;Reference proteome;	4.1.1.15;	K01580;	Unknown SUPERKINGDOM	Unknown KINGDOM	Unknown PHYLUM	Unknown CLASS	Unknown ORDER	Unknown FAMILY	Unknown GENUS	Unknown SPECIES	Unknown SUBSPECIES	0	0	0	0	0	0	0	0	0	0	0	0	0	0	0	0	0	0	0	0	4	199	0	0	19	0	0	0	10	2	0	0	0	0	0	188
Meta-Protein 175	BLAST_TNAA_CALS4 Tryptophanase OS=Caldanaerobacter subterraneus subsp. tengcongensis (strain DSM 15242 / JCM 11007 / NBRC 100824 / MB4) GN=tnaA PE=3 SV=1_Q8R9K5	Complete proteome;Direct protein sequencing;Lyase;Pyridoxal phosphate;Reference proteome;Tryptophan catabolism;	;4.1.99.-;4.1.99.1;	;K01667;	Unknown SUPERKINGDOM	Unknown KINGDOM	Unknown PHYLUM	Unknown CLASS	Unknown ORDER	Unknown FAMILY	Unknown GENUS	Unknown SPECIES	Unknown SUBSPECIES	0	14	1	1	0	15	26	6	11	14	0	6	7	16	0	16	5	7	1	8	0	14	15	2	4	32	9	0	0	1	0	15	4	0	3	0
Meta-Protein 2333	Metagenome unknown				Unknown SUPERKINGDOM	Unknown KINGDOM	Unknown PHYLUM	Unknown CLASS	Unknown ORDER	Unknown FAMILY	Unknown GENUS	Unknown SPECIES	Unknown SUBSPECIES	29	98	0	0	0	0	0	0	43	0	0	0	0	0	0	0	8	0	0	0	0	0	0	0	0	10	0	0	0	273	0	0	0	0	0	0
Meta-Protein 439	BLAST_MGLB_TREPA Glucose/galactose-binding lipoprotein OS=Treponema pallidum (strain Nichols) GN=mglB PE=1 SV=1_Q08255	3D-structure;Cell membrane;Complete proteome;Lipoprotein;Membrane;Palmitate;Reference proteome;Signal;Sugar transport;Transport;	;	K10540;	Unknown SUPERKINGDOM	Unknown KINGDOM	Unknown PHYLUM	Unknown CLASS	Unknown ORDER	Unknown FAMILY	Unknown GENUS	Unknown SPECIES	Unknown SUBSPECIES	18	30	5	18	13	12	15	8	11	17	3	13	7	4	1	5	0	1	1	3	20	4	2	7	18	9	2	1	2	7	0	10	8	4	6	1
Meta-Protein 136	BLAST_ARAA_GEOSE L-arabinose isomerase OS=Geobacillus stearothermophilus GN=araA PE=1 SV=2_Q9S467	3D-structure;Arabinose catabolism;Carbohydrate metabolism;Complete proteome;Isomerase;Manganese;Metal-binding;Reference proteome;	5.3.1.4;	;K01804;	Unknown SUPERKINGDOM	Unknown KINGDOM	Unknown PHYLUM	Unknown CLASS	Unknown ORDER	Unknown FAMILY	Unknown GENUS	Unknown SPECIES	Unknown SUBSPECIES	35	8	6	2	35	5	18	32	3	13	1	21	4	7	0	0	0	1	2	0	0	3	4	0	1	11	3	34	0	12	0	7	17	4	3	0
Meta-Protein 1693	BLAST_ACDS_MEGEL Acyl-CoA dehydrogenase, short-chain specific OS=Megasphaera elsdenii PE=1 SV=1_Q06319	3D-structure;Complete proteome;Cytoplasm;Direct protein sequencing;FAD;Fatty acid metabolism;Flavoprotein;Lipid metabolism;NAD;Oxidoreductase;Reference proteome;	1.3.1.95;1.3.8.1;1.3.99.-;	;K20143;	Unknown SUPERKINGDOM	Unknown KINGDOM	Unknown PHYLUM	Unknown CLASS	Unknown ORDER	Unknown FAMILY	Unknown GENUS	Unknown SPECIES	Unknown SUBSPECIES	33	10	0	0	23	18	20	9	14	0	0	6	2	8	0	0	2	0	0	5	0	0	8	9	13	15	0	0	0	26	0	9	0	0	0	0
Meta-Protein 910	BLAST_CYCB_BACSU Cyclodextrin-binding protein OS=Bacillus subtilis (strain 168) GN=cycB PE=1 SV=1_O07009	Cell membrane;Complete proteome;Lipoprotein;Membrane;Palmitate;Periplasm;Polysaccharide transport;Reference proteome;Signal;Sugar transport;Transport;	;	K02027;K10117;K15770;K17234;	Unknown SUPERKINGDOM	Unknown KINGDOM	Unknown PHYLUM	Unknown CLASS	Unknown ORDER	Unknown FAMILY	Unknown GENUS	Unknown SPECIES	Unknown SUBSPECIES	0	55	0	3	4	22	73	18	2	9	0	0	24	20	1	6	0	0	0	0	0	22	58	0	62	0	0	6	0	0	0	45	7	0	0	0
Meta-Protein 1080	Metagenome unknown	Cell wall;Direct protein sequencing;Repeat;S-layer;Secreted;Signal;	;	;	Unknown SUPERKINGDOM	Unknown KINGDOM	Unknown PHYLUM	Unknown CLASS	Unknown ORDER	Unknown FAMILY	Unknown GENUS	Unknown SPECIES	Unknown SUBSPECIES	126	1	0	6	3	0	0	44	132	1	0	1	0	5	55	7	0	1	76	0	0	2	0	1	0	0	4	0	0	0	0	0	20	0	1	0
Meta-Protein 293	BLAST_ATPA_PANTR ATP synthase subunit alpha, mitochondrial OS=Pan troglodytes GN=ATP5A1 PE=2 SV=1_A5A6H5	3D-structure;ATP synthesis;ATP-binding;Acetylation;Alternative splicing;CF(1);Cell inner membrane;Cell membrane;Chloroplast;Complete proteome;Cyanelle;Direct protein sequencing;Disease mutation;Glycoprotein;Hydrogen ion transport;Hydrolase;Ion channel;Ion transport;Isopeptide bond;Membrane;Methylation;Mitochondrion;Mitochondrion inner membrane;Nucleotide-binding;Phosphoprotein;Plasmid;Plastid;Pol…	;3.6.3.14;3.6.3.15;	;K02111;K02132;K03072;K03282;	Unknown SUPERKINGDOM	Unknown KINGDOM	Unknown PHYLUM	Unknown CLASS	Unknown ORDER	Unknown FAMILY	Unknown GENUS	Unknown SPECIES	Unknown SUBSPECIES	1	2	8	1	3	14	22	2	6	6	7	2	3	17	2	2	4	6	4	10	6	21	8	19	10	6	2	29	3	4	14	4	1	5	5	17
Meta-Protein 981	Metagenome unknown				Unknown SUPERKINGDOM	Unknown KINGDOM	Unknown PHYLUM	Unknown CLASS	Unknown ORDER	Unknown FAMILY	Unknown GENUS	Unknown SPECIES	Unknown SUBSPECIES	0	11	0	1	2	11	0	0	24	0	0	0	22	4	0	0	0	0	3	0	0	13	0	6	0	0	18	0	0	10	0	0	0	128	0	0
Meta-Protein 659	ENO2_YEAST Enolase 2 OS=Saccharomyces cerevisiae (strain ATCC 204508 / S288c) GN=ENO2 PE=1 SV=2	3D-structure;Allergen;Complete proteome;Cytoplasm;Direct protein sequencing;Glycolysis;Isopeptide bond;Lyase;Magnesium;Metal-binding;Phosphoprotein;Reference proteome;Ubl conjugation;	4.2.1.11;	;K01689;	Unknown SUPERKINGDOM	Unknown KINGDOM	Unknown PHYLUM	Unknown CLASS	Unknown ORDER	Unknown FAMILY	Unknown GENUS	Unknown SPECIES	Unknown SUBSPECIES	0	5	8	0	0	3	0	0	0	0	1	0	0	0	0	0	0	0	0	0	15	1	0	0	0	0	2	0	0	0	96	0	90	0	9	12
Meta-Protein 1142	BLAST_TYPH_LACRH Thymidine phosphorylase (Fragment) OS=Lactobacillus rhamnosus GN=deoA PE=1 SV=1_P19663	3D-structure;Complete proteome;Cytoplasm;Direct protein sequencing;Glycolysis;Glycosyltransferase;NAD;Nucleotide-binding;Oxidoreductase;Reference proteome;Transferase;	1.2.1.12;2.4.2.4;	;K00134;	Bacteria	Unknown KINGDOM	Unknown PHYLUM	Unknown CLASS	Unknown ORDER	Unknown FAMILY	Unknown GENUS	Unknown SPECIES	Unknown SUBSPECIES	8	31	4	6	44	27	80	14	21	14	0	0	30	29	0	0	0	6	0	10	0	3	30	0	13	2	19	7	2	0	0	7	47	0	15	0
Meta-Protein 850	BLAST_PORF_PSESY Outer membrane porin F OS=Pseudomonas syringae pv. syringae GN=oprF PE=3 SV=1_P22263	3D-structure;Cell membrane;Cell outer membrane;Cell shape;Complete proteome;Direct protein sequencing;Disulfide bond;Ion transport;Membrane;Porin;Reference proteome;Repeat;Signal;Transmembrane;Transmembrane beta strand;Transmembrane helix;Transport;	;	;K03286;	Unknown SUPERKINGDOM	Unknown KINGDOM	Unknown PHYLUM	Unknown CLASS	Unknown ORDER	Unknown FAMILY	Unknown GENUS	Unknown SPECIES	Unknown SUBSPECIES	0	1	4	0	5	58	72	0	0	1	0	0	0	0	0	0	0	52	0	1	0	83	0	25	0	0	0	0	8	0	0	12	0	0	15	0
Meta-Protein 130	BLAST_RRBR1_CLOAB Reverse rubrerythrin-1 OS=Clostridium acetobutylicum (strain ATCC 824 / DSM 792 / JCM 1419 / LMG 5710 / VKM B-1787) GN=rbr3A PE=1 SV=1_Q97D82	Complete proteome;Detoxification;Direct protein sequencing;Electron transport;Iron;Metal-binding;NAD;Oxidoreductase;Peroxidase;Reference proteome;Stress response;Transport;	1.11.1.1;	;	Unknown SUPERKINGDOM	Unknown KINGDOM	Unknown PHYLUM	Unknown CLASS	Unknown ORDER	Unknown FAMILY	Unknown GENUS	Unknown SPECIES	Unknown SUBSPECIES	7	11	17	7	17	15	16	11	38	13	10	32	10	10	1	5	9	6	4	13	0	2	3	2	2	12	7	0	0	6	0	6	6	15	10	5
Meta-Protein 1173	BLAST_MDH_RHIEC Malate dehydrogenase OS=Rhizobium etli (strain CFN 42 / ATCC 51251) GN=mdh PE=3 SV=1_Q2K3E9	Complete proteome;NAD;Oxidoreductase;Reference proteome;Tricarboxylic acid cycle;	1.1.1.37;	K00024;	Unknown SUPERKINGDOM	Unknown KINGDOM	Unknown PHYLUM	Unknown CLASS	Unknown ORDER	Unknown FAMILY	Unknown GENUS	Unknown SPECIES	Unknown SUBSPECIES	0	0	7	0	0	33	38	0	0	0	0	0	0	0	0	0	0	21	0	0	1	74	0	37	0	0	0	0	7	0	0	0	0	0	0	0
Meta-Protein 433	BLAST_RL7_BACV8 50S ribosomal protein L7/L12 OS=Bacteroides vulgatus (strain ATCC 8482 / DSM 1447 / JCM 5826 / NBRC 14291 / NCTC 11154) GN=rplL PE=3 SV=1_A6KYK4	3D-structure;Acetylation;Complete proteome;Direct protein sequencing;Methylation;Reference proteome;Ribonucleoprotein;Ribosomal protein;	;	K02935;	Unknown SUPERKINGDOM	Unknown KINGDOM	Unknown PHYLUM	Unknown CLASS	Unknown ORDER	Unknown FAMILY	Unknown GENUS	Unknown SPECIES	Unknown SUBSPECIES	0	0	0	0	0	8	6	0	0	0	0	0	0	0	0	0	0	6	0	0	7	83	0	12	0	0	0	0	0	0	0	5	0	0	0	14
Meta-Protein 3169	Metagenome unknown				Unknown SUPERKINGDOM	Unknown KINGDOM	Unknown PHYLUM	Unknown CLASS	Unknown ORDER	Unknown FAMILY	Unknown GENUS	Unknown SPECIES	Unknown SUBSPECIES	181	0	0	38	0	0	0	10	0	0	0	2	0	0	0	0	0	0	2	0	0	0	5	0	24	0	0	175	0	18	0	2	46	40	0	0
Meta-Protein 647	BLAST_AHPC_SALTI Alkyl hydroperoxide reductase C OS=Salmonella typhi GN=ahpC PE=3 SV=2_P0A252	3D-structure;Acetylation;Antioxidant;Complete proteome;Cytoplasm;Direct protein sequencing;Disulfide bond;Oxidoreductase;Peroxidase;Redox-active center;Reference proteome;Secreted;	1.11.1.15;	K03386;	Unknown SUPERKINGDOM	Unknown KINGDOM	Unknown PHYLUM	Unknown CLASS	Unknown ORDER	Unknown FAMILY	Unknown GENUS	Unknown SPECIES	Unknown SUBSPECIES	0	1	0	0	2	2	0	16	0	0	0	0	0	0	0	0	0	0	0	0	10	39	6	14	16	0	0	0	0	19	9	0	2	0	0	54
Meta-Protein 82	BLAST_ARAA_BACV8 L-arabinose isomerase OS=Bacteroides vulgatus (strain ATCC 8482 / DSM 1447 / JCM 5826 / NBRC 14291 / NCTC 11154) GN=araA PE=3 SV=1_A6L2R5	Arabinose catabolism;Carbohydrate metabolism;Complete proteome;Isomerase;Manganese;Metal-binding;Reference proteome;	5.3.1.4;	K01804;	Unknown SUPERKINGDOM	Unknown KINGDOM	Unknown PHYLUM	Unknown CLASS	Unknown ORDER	Unknown FAMILY	Unknown GENUS	Unknown SPECIES	Unknown SUBSPECIES	2	2	5	0	12	19	44	2	0	0	0	6	0	8	7	0	0	33	11	0	0	43	12	18	11	0	0	0	8	0	0	3	2	28	0	0
Meta-Protein 435	FLNC_HUMAN Filamin-C OS=Homo sapiens GN=FLNC PE=1 SV=3	3D-structure;Acetylation;Actin-binding;Alternative splicing;Calcium;Cardiomyopathy;Cell membrane;Cell projection;Cilium biogenesis/degradation;Complete proteome;Cytoplasm;Cytoskeleton;Deafness;Developmental protein;Differentiation;Direct protein sequencing;Disease mutation;Dwarfism;Golgi apparatus;Isopeptide bond;Leucine-rich repeat;Membrane;Metal-binding;Methylation;Microtubule;Myofibrillar myop…	;	;K04437;	Unknown SUPERKINGDOM	Unknown KINGDOM	Unknown PHYLUM	Unknown CLASS	Unknown ORDER	Unknown FAMILY	Unknown GENUS	Unknown SPECIES	Unknown SUBSPECIES	11	0	0	2	0	0	2	0	70	0	0	0	0	1	0	6	3	0	0	0	4	0	0	11	0	0	51	14	0	8	3	0	0	0	0	0
Meta-Protein 194	BLAST_YESO_BACSU Putative ABC transporter substrate-binding protein YesO OS=Bacillus subtilis (strain 168) GN=yesO PE=1 SV=2_O31518	3D-structure;Complete proteome;Periplasm;Reference proteome;Signal;Transport;	;	K02027;	Unknown SUPERKINGDOM	Unknown KINGDOM	Unknown PHYLUM	Unknown CLASS	Unknown ORDER	Unknown FAMILY	Unknown GENUS	Unknown SPECIES	Unknown SUBSPECIES	0	1	13	0	0	10	36	11	41	0	1	5	6	4	0	6	6	0	3	0	0	6	0	2	0	19	2	0	0	0	0	2	0	52	12	0
Meta-Protein 1033	BLAST_SP39_RHILO Probable sugar-binding periplasmic protein OS=Rhizobium loti (strain MAFF303099) GN=mlr3050 PE=3 SV=2_Q98H33	Complete proteome;Periplasm;Reference proteome;Signal;Sugar transport;Transport;	;	K17315;	Unknown SUPERKINGDOM	Unknown KINGDOM	Unknown PHYLUM	Unknown CLASS	Unknown ORDER	Unknown FAMILY	Unknown GENUS	Unknown SPECIES	Unknown SUBSPECIES	45	0	0	1	0	0	1	0	1	7	0	7	0	0	0	0	0	0	3	9	0	0	0	32	2	21	0	0	0	78	0	0	2	37	14	0
Meta-Protein 434	BLAST_PNP_LACP7 Polyribonucleotide nucleotidyltransferase OS=Lachnoclostridium phytofermentans (strain ATCC 700394 / DSM 18823 / ISDg) GN=pnp PE=3 SV=1_A9KNK6	Complete proteome;Cytoplasm;Magnesium;Metal-binding;Nucleotidyltransferase;RNA-binding;Reference proteome;Transferase;	2.7.7.8;	;K00962;	Unknown SUPERKINGDOM	Unknown KINGDOM	Unknown PHYLUM	Unknown CLASS	Unknown ORDER	Unknown FAMILY	Unknown GENUS	Unknown SPECIES	Unknown SUBSPECIES	6	6	13	3	2	10	8	14	17	6	2	15	7	8	2	1	19	5	2	2	0	6	9	9	0	19	2	6	3	4	2	3	3	7	3	10
Meta-Protein 744	BLAST_MDH_RICCK Malate dehydrogenase OS=Rickettsia canadensis (strain McKiel) GN=mdh PE=3 SV=1_A8EZ58	Complete proteome;NAD;Oxidoreductase;Reference proteome;Tricarboxylic acid cycle;	1.1.1.37;	K00024;	Unknown SUPERKINGDOM	Unknown KINGDOM	Unknown PHYLUM	Unknown CLASS	Unknown ORDER	Unknown FAMILY	Unknown GENUS	Unknown SPECIES	Unknown SUBSPECIES	0	0	0	0	0	29	36	0	0	0	0	0	0	0	0	0	0	21	0	0	1	97	0	28	0	0	0	0	6	0	0	0	0	0	1	0
Meta-Protein 24253	Metagenome unknown				Unknown SUPERKINGDOM	Unknown KINGDOM	Unknown PHYLUM	Unknown CLASS	Unknown ORDER	Unknown FAMILY	Unknown GENUS	Unknown SPECIES	Unknown SUBSPECIES	0	0	0	3	0	0	2	0	0	0	0	1	3	1	0	0	0	0	0	2	27	1	12	43	24	3	7	29	34	29	4	2	5	0	3	4
Meta-Protein 1196	BLAST_ACSC_MOOTH Corrinoid/iron-sulfur protein large subunit OS=Moorella thermoacetica GN=acsC PE=1 SV=2_Q07340	3D-structure;4Fe-4S;Carbon dioxide fixation;Cobalt;Direct protein sequencing;Iron;Iron-sulfur;Metal-binding;	;	;	Unknown SUPERKINGDOM	Unknown KINGDOM	Unknown PHYLUM	Unknown CLASS	Unknown ORDER	Unknown FAMILY	Unknown GENUS	Unknown SPECIES	Unknown SUBSPECIES	61	15	6	7	20	10	12	5	3	9	3	23	6	4	12	11	5	4	6	5	0	0	18	0	4	7	2	0	0	4	0	2	25	31	7	0
Meta-Protein 974	BLAST_ACDS_MEGEL Acyl-CoA dehydrogenase, short-chain specific OS=Megasphaera elsdenii PE=1 SV=1_Q06319	3D-structure;Complete proteome;Direct protein sequencing;FAD;Fatty acid metabolism;Flavoprotein;Lipid degradation;Lipid metabolism;Oxidoreductase;Reference proteome;	1.3.8.1;1.3.99.-;	;	Unknown SUPERKINGDOM	Unknown KINGDOM	Unknown PHYLUM	Unknown CLASS	Unknown ORDER	Unknown FAMILY	Unknown GENUS	Unknown SPECIES	Unknown SUBSPECIES	0	6	0	15	0	15	55	0	28	23	1	6	5	36	0	7	1	0	0	0	0	0	15	0	1	19	19	0	0	14	6	9	42	0	11	0
Meta-Protein 511	BLAST_PCCB_RHOS4 Propionyl-CoA carboxylase beta chain OS=Rhodobacter sphaeroides (strain ATCC 17023 / 2.4.1 / NCIB 8253 / DSM 158) GN=pccB PE=1 SV=1_Q3J4E3	3D-structure;ATP-binding;Acetylation;Alternative splicing;Complete proteome;Direct protein sequencing;Disease mutation;Ligase;Lyase;Mitochondrion;Nucleotide-binding;Phosphoprotein;Polymorphism;Reference proteome;Transferase;Transit peptide;	2.1.3.1;6.4.1.3;	;K01966;K19312;	Unknown SUPERKINGDOM	Unknown KINGDOM	Unknown PHYLUM	Unknown CLASS	Unknown ORDER	Unknown FAMILY	Unknown GENUS	Unknown SPECIES	Unknown SUBSPECIES	0	11	0	0	71	14	5	8	0	1	0	2	0	0	0	1	3	12	1	5	0	45	3	7	12	26	0	0	0	4	0	1	14	26	0	0
Meta-Protein 21	BLAST_SUSB_BACTN Glucan 1,4-alpha-glucosidase SusB OS=Bacteroides thetaiotaomicron (strain ATCC 29148 / DSM 2079 / NCTC 10582 / E50 / VPI-5482) GN=susB PE=1 SV=1_G8JZS4	3D-structure;Calcium;Carbohydrate metabolism;Complete proteome;Glycosidase;Hydrolase;Metal-binding;Periplasm;Polysaccharide degradation;Reference proteome;Signal;	3.2.1.3;	K21574;	Unknown SUPERKINGDOM	Unknown KINGDOM	Unknown PHYLUM	Unknown CLASS	Unknown ORDER	Unknown FAMILY	Unknown GENUS	Unknown SPECIES	Unknown SUBSPECIES	3	1	3	0	14	7	0	4	4	0	1	2	1	31	3	0	0	9	0	1	4	16	4	3	3	6	2	6	6	6	0	7	4	17	6	0
Meta-Protein 219	ENOB_HUMAN Beta-enolase OS=Homo sapiens GN=ENO3 PE=1 SV=5	3D-structure;Acetylation;Allergen;Alternative initiation;Alternative splicing;Cell membrane;Complete proteome;Cytoplasm;DNA-binding;Direct protein sequencing;Disease mutation;Eye lens protein;Glycogen storage disease;Glycolysis;Glycoprotein;Hydrogen peroxide;Isopeptide bond;Lyase;Magnesium;Membrane;Metal-binding;Mitochondrion;Mitochondrion outer membrane;Nucleus;Oxidoreductase;Peroxidase;Phosphop…	1.11.1.7;4.2.1.11;	;K01689;	Unknown SUPERKINGDOM	Unknown KINGDOM	Unknown PHYLUM	Unknown CLASS	Unknown ORDER	Unknown FAMILY	Unknown GENUS	Unknown SPECIES	Unknown SUBSPECIES	0	8	0	1	0	2	22	0	19	0	2	34	0	10	1	0	1	0	0	5	0	18	0	3	0	13	17	13	2	18	28	1	0	11	0	0
Meta-Protein 3167	Metagenome unknown				Unknown SUPERKINGDOM	Unknown KINGDOM	Unknown PHYLUM	Unknown CLASS	Unknown ORDER	Unknown FAMILY	Unknown GENUS	Unknown SPECIES	Unknown SUBSPECIES	0	7	0	0	1	0	0	17	0	0	0	20	0	0	0	11	0	0	0	12	0	0	0	0	0	0	0	0	0	210	0	0	3	0	0	0
Meta-Protein 847	BLAST_CYCB_BACSU Cyclodextrin-binding protein OS=Bacillus subtilis (strain 168) GN=cycB PE=1 SV=1_O07009	Cell membrane;Complete proteome;Lipoprotein;Membrane;Palmitate;Reference proteome;Signal;Sugar transport;Transport;	;	K15770;	Unknown SUPERKINGDOM	Unknown KINGDOM	Unknown PHYLUM	Unknown CLASS	Unknown ORDER	Unknown FAMILY	Unknown GENUS	Unknown SPECIES	Unknown SUBSPECIES	0	3	0	11	30	17	0	0	17	3	0	0	22	12	0	0	0	0	11	0	0	28	0	0	0	0	8	0	0	6	1	0	0	31	0	0
Meta-Protein 534	BLAST_G6PI_BACFR Glucose-6-phosphate isomerase OS=Bacteroides fragilis (strain YCH46) GN=pgi PE=3 SV=1_Q64PM7	Complete proteome;Cytoplasm;Gluconeogenesis;Glycolysis;Isomerase;Reference proteome;	5.3.1.9;	K01810;	Unknown SUPERKINGDOM	Unknown KINGDOM	Unknown PHYLUM	Unknown CLASS	Unknown ORDER	Unknown FAMILY	Unknown GENUS	Unknown SPECIES	Unknown SUBSPECIES	0	2	2	0	0	29	13	4	4	0	0	8	0	0	0	0	1	6	0	7	0	60	8	12	8	9	0	0	2	10	0	0	8	50	0	1
Meta-Protein 1301	ECP_HUMAN Eosinophil cationic protein OS=Homo sapiens GN=RNASE3 PE=1 SV=2	3D-structure;Antibiotic;Antimicrobial;Complete proteome;Direct protein sequencing;Disulfide bond;Endonuclease;Glycoprotein;Hydrolase;Nitration;Nuclease;Polymorphism;Reference proteome;Secreted;Signal;	3.1.27.-;	;K10787;	Eukaryota	Metazoa	Chordata	Mammalia	Primates	Unknown FAMILY	Unknown GENUS	Unknown SPECIES	Unknown SUBSPECIES	12	0	0	6	9	1	0	2	3	1	0	9	0	4	0	1	1	0	3	0	30	4	0	3	13	0	17	6	23	3	11	9	91	0	6	1
Meta-Protein 123	BLAST_ILEU_HUMAN Leukocyte elastase inhibitor OS=Homo sapiens GN=SERPINB1 PE=1 SV=1_P30740	3D-structure;Acetylation;Alternative splicing;Complete proteome;Cytoplasm;Direct protein sequencing;Disulfide bond;Glycoprotein;Phosphoprotein;Polymorphism;Protease inhibitor;Reference proteome;Secreted;Serine protease inhibitor;Signal;	;	;K13963;K13965;	Eukaryota	Metazoa	Chordata	Unknown CLASS	Unknown ORDER	Unknown FAMILY	Unknown GENUS	Unknown SPECIES	Unknown SUBSPECIES	0	0	2	0	0	15	19	0	7	4	0	7	1	0	0	1	2	2	0	11	10	18	11	21	4	0	0	0	17	0	54	4	61	0	1	0
Meta-Protein 683	BLAST_IMDH_STRP3 Inosine-5-monophosphate dehydrogenase OS=Streptococcus pyogenes serotype M3 (strain ATCC BAA-595 / MGAS315) GN=guaB PE=3 SV=1_P0DB88	3D-structure;CBS domain;Complete proteome;Direct protein sequencing;GMP biosynthesis;Metal-binding;NAD;Oxidoreductase;Plasmid;Potassium;Purine biosynthesis;Reference proteome;Repeat;	;1.1.1.205;	;K00088;	Unknown SUPERKINGDOM	Unknown KINGDOM	Unknown PHYLUM	Unknown CLASS	Unknown ORDER	Unknown FAMILY	Unknown GENUS	Unknown SPECIES	Unknown SUBSPECIES	0	0	0	0	0	14	37	0	0	0	0	0	0	0	0	1	2	8	0	0	0	76	0	39	4	0	0	0	0	0	0	0	2	11	1	0
Meta-Protein 507	BLAST_PTAS_CLOTH Phosphate acetyltransferase OS=Clostridium thermocellum (strain ATCC 27405 / DSM 1237 / NBRC 103400 / NCIMB 10682 / NRRL B-4536 / VPI 7372) GN=pta PE=3 SV=1_O52593	Acyltransferase;Complete proteome;Cytoplasm;Reference proteome;Transferase;	2.3.1.8;	K00625;	Unknown SUPERKINGDOM	Unknown KINGDOM	Unknown PHYLUM	Unknown CLASS	Unknown ORDER	Unknown FAMILY	Unknown GENUS	Unknown SPECIES	Unknown SUBSPECIES	25	13	2	7	5	3	13	7	32	6	0	32	2	3	8	14	2	4	1	4	0	0	2	0	20	23	2	0	0	20	0	0	8	25	1	2
Meta-Protein 382	BLAST_DGAL_SALTY D-galactose-binding periplasmic protein OS=Salmonella typhimurium (strain LT2 / SGSC1412 / ATCC 700720) GN=mglB PE=1 SV=2_P23905	3D-structure;Calcium;Cell membrane;Chemotaxis;Complete proteome;Direct protein sequencing;Lipoprotein;Membrane;Metal-binding;Palmitate;Periplasm;Reference proteome;Signal;Sugar transport;Transport;	;	;K10540;	Unknown SUPERKINGDOM	Unknown KINGDOM	Unknown PHYLUM	Unknown CLASS	Unknown ORDER	Unknown FAMILY	Unknown GENUS	Unknown SPECIES	Unknown SUBSPECIES	1	5	6	0	0	2	10	6	6	1	4	4	6	1	0	8	0	0	0	10	0	1	1	0	2	4	16	19	0	0	0	15	26	17	3	0
Meta-Protein 437	BLAST_RL4_AGARV 50S ribosomal protein L4 OS=Agathobacter rectalis (strain ATCC 33656 / DSM 3377 / JCM 17463 / KCTC 5835 / VPI 0990) GN=rplD PE=3 SV=1_C4ZBD5	Complete proteome;RNA-binding;Reference proteome;Ribonucleoprotein;Ribosomal protein;rRNA-binding;	;	K02926;	Unknown SUPERKINGDOM	Unknown KINGDOM	Unknown PHYLUM	Unknown CLASS	Unknown ORDER	Unknown FAMILY	Unknown GENUS	Unknown SPECIES	Unknown SUBSPECIES	24	11	0	14	4	10	13	7	13	6	6	13	9	10	10	12	2	3	8	0	0	0	10	2	16	4	0	6	2	17	1	12	6	5	7	0
Meta-Protein 17150	BLAST_GAHP2_LACP7 1,3-beta-galactosyl-N-acetylhexosamine phosphorylase Cphy0577 OS=Lachnoclostridium phytofermentans (strain ATCC 700394 / DSM 18823 / ISDg) GN=Cphy_0577 PE=1 SV=1_A9KIW5	Carbohydrate metabolism;Complete proteome;Glycosyltransferase;Reference proteome;Transferase;	2.4.1.211;	K15533;	Bacteria	Unknown KINGDOM	Firmicutes	Clostridia	Clostridiales	Clostridiaceae	Clostridium	Clostridium phytofermentans	Clostridium phytofermentans ISDg	11	5	5	37	11	7	11	3	1	5	1	13	26	10	2	1	15	2	0	2	0	3	2	5	5	1	22	10	7	3	4	16	2	4	17	12
Meta-Protein 12702	BLAST_ETFA_THETC Electron transfer flavoprotein subunit alpha OS=Thermoanaerobacterium thermosaccharolyticum (strain ATCC 7956 / DSM 571 / NCIB 9385 / NCA 3814) GN=etfA PE=3 SV=2_P71153	Complete proteome;Electron transport;FAD;Flavoprotein;Transport;	;	K03522;	Bacteria	Unknown KINGDOM	Firmicutes	Clostridia	Thermoanaerobacterales	Thermoanaerobacterales Family III. Incertae Sedis	Thermoanaerobacterium	Thermoanaerobacterium thermosaccharolyticum	Thermoanaerobacterium thermosaccharolyticum DSM 571	6	23	21	12	0	6	11	10	12	4	1	19	11	2	1	0	3	1	2	4	0	2	0	5	0	32	6	0	0	0	0	16	14	8	15	0
Meta-Protein 13941	BLAST_AMIB_ECOLI N-acetylmuramoyl-L-alanine amidase AmiB OS=Escherichia coli (strain K12) GN=amiB PE=1 SV=2_P26365	Cell wall biogenesis/degradation;Complete proteome;Hydrolase;Periplasm;Reference proteome;Signal;	3.5.1.28;	K01448;	Bacteria	Unknown KINGDOM	Proteobacteria	Gammaproteobacteria	Enterobacteriales	Enterobacteriaceae	Escherichia	Escherichia coli	Escherichia coli K-12	6	4	2	9	8	4	6	4	4	2	2	4	13	13	1	5	3	1	5	2	13	2	10	4	14	4	11	11	10	7	14	4	14	3	4	9
Meta-Protein 3815	BLAST_DFX_PELCD Desulfoferrodoxin OS=Pelobacter carbinolicus (strain DSM 2380 / NBRC 103641 / GraBd1) GN=dfx PE=3 SV=1_Q3A221	3D-structure;Complete proteome;Detoxification;Direct protein sequencing;Electron transport;Iron;Metal-binding;Oxidoreductase;Reference proteome;Transport;	1.15.1.2;	K05919;	Bacteria	Unknown KINGDOM	Proteobacteria	Deltaproteobacteria	Unknown ORDER	Unknown FAMILY	Unknown GENUS	Unknown SPECIES	Unknown SUBSPECIES	0	0	0	0	35	31	41	0	0	0	0	0	0	0	0	0	0	16	0	0	0	73	0	46	0	0	0	0	7	10	0	2	0	0	0	0
Meta-Protein 1609	Metagenome unknown				Unknown SUPERKINGDOM	Unknown KINGDOM	Unknown PHYLUM	Unknown CLASS	Unknown ORDER	Unknown FAMILY	Unknown GENUS	Unknown SPECIES	Unknown SUBSPECIES	0	0	0	2	0	50	0	0	0	0	0	0	2	0	0	0	0	38	0	0	0	101	4	0	0	0	0	0	0	52	0	0	0	0	2	4
Meta-Protein 588	BLAST_FUB7_GIBF5 Sulfhydrylase FUB7 OS=Gibberella fujikuroi (strain CBS 195.34 / IMI 58289 / NRRL A-6831) GN=FUB7 PE=1 SV=1_S0DUX5	Amino-acid biosynthesis;Complete proteome;Cysteine biosynthesis;Cytoplasm;Methionine biosynthesis;Multifunctional enzyme;Nucleus;Pyridoxal phosphate;Reference proteome;Transferase;	2.5.1.-;2.5.1.47;2.5.1.49;	;K17069;	Unknown SUPERKINGDOM	Unknown KINGDOM	Unknown PHYLUM	Unknown CLASS	Unknown ORDER	Unknown FAMILY	Unknown GENUS	Unknown SPECIES	Unknown SUBSPECIES	5	12	28	4	1	10	11	17	18	13	9	6	5	10	1	0	1	1	3	3	0	47	12	35	0	2	1	0	0	3	1	4	5	27	36	0
Meta-Protein 279	BLAST_NGAL_HUMAN Neutrophil gelatinase-associated lipocalin OS=Homo sapiens GN=LCN2 PE=1 SV=2_P80188	3D-structure;Alternative splicing;Apoptosis;Complete proteome;Direct protein sequencing;Disulfide bond;Glycoprotein;Immunity;Innate immunity;Ion transport;Iron;Iron transport;Pyrrolidone carboxylic acid;Reference proteome;Secreted;Signal;Transport;	;	K21129;	Eukaryota	Metazoa	Chordata	Mammalia	Primates	Hominidae	Homo	Homo sapiens	Unknown SUBSPECIES	18	11	0	2	10	19	7	15	5	2	0	3	1	6	0	1	1	0	3	0	16	6	4	3	20	2	0	1	33	2	31	3	50	0	6	6
Meta-Protein 296	BLAST_YOE2_STRAT Uncharacterized lipoprotein in oleD 5region OS=Streptomyces antibioticus PE=3 SV=1_Q53684	Cell membrane;Lipoprotein;Membrane;Palmitate;Signal;	;	;	Unknown SUPERKINGDOM	Unknown KINGDOM	Unknown PHYLUM	Unknown CLASS	Unknown ORDER	Unknown FAMILY	Unknown GENUS	Unknown SPECIES	Unknown SUBSPECIES	3	0	11	1	0	8	10	6	41	0	1	0	6	0	0	1	6	2	4	0	0	2	0	14	0	18	2	0	0	1	0	17	3	34	7	0
Meta-Protein 1667	Metagenome unknown	Complete proteome;NAD;Oxidoreductase;Reference proteome;Tricarboxylic acid cycle;	1.1.1.37;	K00024;	Unknown SUPERKINGDOM	Unknown KINGDOM	Unknown PHYLUM	Unknown CLASS	Unknown ORDER	Unknown FAMILY	Unknown GENUS	Unknown SPECIES	Unknown SUBSPECIES	6	4	12	8	4	4	10	0	0	0	3	1	0	23	15	4	2	0	6	0	0	0	6	8	101	6	0	4	10	19	0	0	1	78	0	9
Meta-Protein 4443	Metagenome unknown				Unknown SUPERKINGDOM	Unknown KINGDOM	Unknown PHYLUM	Unknown CLASS	Unknown ORDER	Unknown FAMILY	Unknown GENUS	Unknown SPECIES	Unknown SUBSPECIES	0	0	0	0	172	318	0	0	0	0	0	0	0	0	0	0	0	0	0	0	1	31	0	0	0	0	0	0	2	0	3	0	0	0	0	0
Meta-Protein 486	BLAST_KDGK_THET8 2-dehydro-3-deoxygluconokinase OS=Thermus thermophilus (strain HB8 / ATCC 27634 / DSM 579) GN=kdgK PE=1 SV=1_Q53W83	3D-structure;ATP-binding;Carbohydrate metabolism;Complete proteome;Kinase;Nucleotide-binding;Plasmid;Reference proteome;Transferase;	2.7.1.45;	K00874;	Unknown SUPERKINGDOM	Unknown KINGDOM	Unknown PHYLUM	Unknown CLASS	Unknown ORDER	Unknown FAMILY	Unknown GENUS	Unknown SPECIES	Unknown SUBSPECIES	0	4	4	1	3	8	19	4	0	0	0	7	0	6	5	3	0	7	3	0	0	16	10	5	5	7	4	7	26	3	0	0	2	22	1	5
Meta-Protein 1175	BLAST_ARCA_TREDE Arginine deiminase OS=Treponema denticola (strain ATCC 35405 / CIP 103919 / DSM 14222) GN=arcA PE=3 SV=1_Q73QJ2	Arginine metabolism;Complete proteome;Cytoplasm;Hydrolase;Reference proteome;	3.5.3.6;	K01478;	Unknown SUPERKINGDOM	Unknown KINGDOM	Unknown PHYLUM	Unknown CLASS	Unknown ORDER	Unknown FAMILY	Unknown GENUS	Unknown SPECIES	Unknown SUBSPECIES	21	5	3	4	0	2	29	1	6	10	0	10	8	6	0	0	0	0	0	1	0	0	3	0	5	16	2	3	0	65	0	1	0	4	0	0
Meta-Protein 172	BLAST_Y568_HAEIN Uncharacterized protein HI_0568 OS=Haemophilus influenzae (strain ATCC 51907 / DSM 11121 / KW20 / Rd) GN=HI_0568 PE=4 SV=1_P71353	Chloroplast;Complete proteome;Cytoplasm;Exonuclease;Hydrolase;Magnesium;Metal-binding;Nuclease;Nucleotidyltransferase;Plastid;RNA-binding;Reference proteome;Repeat;Ribonucleoprotein;Ribosomal protein;Transferase;Transit peptide;mRNA processing;rRNA processing;tRNA processing;	;2.7.7.8;	;K00962;K02945;K06959;	Unknown SUPERKINGDOM	Unknown KINGDOM	Unknown PHYLUM	Unknown CLASS	Unknown ORDER	Unknown FAMILY	Unknown GENUS	Unknown SPECIES	Unknown SUBSPECIES	0	6	11	0	0	15	28	8	19	1	0	4	0	0	0	0	4	9	0	3	0	32	0	11	1	8	2	2	0	2	1	0	6	39	0	0
Meta-Protein 321	BLAST_RRBR1_CLOAB Reverse rubrerythrin-1 OS=Clostridium acetobutylicum (strain ATCC 824 / DSM 792 / JCM 1419 / LMG 5710 / VKM B-1787) GN=rbr3A PE=1 SV=1_Q97D82	Complete proteome;Detoxification;Direct protein sequencing;Electron transport;Iron;Isomerase;Metal-binding;NAD;Oxidoreductase;Peroxidase;Pyridoxal phosphate;Reference proteome;Stress response;Transport;	1.11.1.1;5.1.1.1;	;K01775;	Unknown SUPERKINGDOM	Unknown KINGDOM	Unknown PHYLUM	Unknown CLASS	Unknown ORDER	Unknown FAMILY	Unknown GENUS	Unknown SPECIES	Unknown SUBSPECIES	1	9	17	0	8	9	7	26	19	5	0	5	8	4	2	0	4	2	1	2	0	0	5	15	2	11	3	0	3	7	8	3	18	6	1	0
Meta-Protein 541	BLAST_RS2_BACFR 30S ribosomal protein S2 OS=Bacteroides fragilis (strain YCH46) GN=rpsB PE=3 SV=1_Q64P29	Complete proteome;Reference proteome;Ribonucleoprotein;Ribosomal protein;	;	K02967;	Unknown SUPERKINGDOM	Unknown KINGDOM	Unknown PHYLUM	Unknown CLASS	Unknown ORDER	Unknown FAMILY	Unknown GENUS	Unknown SPECIES	Unknown SUBSPECIES	0	11	0	0	18	39	39	3	2	0	0	2	0	0	0	0	0	25	1	2	1	33	6	18	0	1	0	0	0	4	1	0	6	12	0	2
Meta-Protein 1956	BLAST_SUSC_BACTN TonB-dependent receptor SusC OS=Bacteroides thetaiotaomicron (strain ATCC 29148 / DSM 2079 / NCTC 10582 / E50 / VPI-5482) GN=susC PE=1 SV=1_Q8A1G1	Carbohydrate metabolism;Cell outer membrane;Complete proteome;Membrane;Receptor;Reference proteome;Signal;TonB box;Transmembrane;Transmembrane beta strand;Transport;	;	K21573;	Unknown SUPERKINGDOM	Unknown KINGDOM	Unknown PHYLUM	Unknown CLASS	Unknown ORDER	Unknown FAMILY	Unknown GENUS	Unknown SPECIES	Unknown SUBSPECIES	0	3	0	7	0	9	20	12	0	0	0	2	0	0	14	13	0	19	0	4	0	0	19	70	12	0	4	1	115	0	0	2	0	41	9	0
Meta-Protein 344	MEP1B_HUMAN Meprin A subunit beta OS=Homo sapiens GN=MEP1B PE=1 SV=3	3D-structure;Alternative promoter usage;Alternative splicing;Cell membrane;Complete proteome;Direct protein sequencing;Disulfide bond;EGF-like domain;Glycoprotein;Hydrolase;Inflammatory response;Membrane;Metal-binding;Metalloprotease;Polymorphism;Protease;Reference proteome;Secreted;Signal;Transmembrane;Transmembrane helix;Zinc;Zymogen;	3.4.24.63;	K08606;	Eukaryota	Metazoa	Chordata	Mammalia	Unknown ORDER	Unknown FAMILY	Unknown GENUS	Unknown SPECIES	Unknown SUBSPECIES	0	0	2	4	0	3	5	6	0	18	0	1	0	4	3	5	17	5	0	4	0	11	7	3	2	7	0	12	0	0	24	26	0	0	6	6
Meta-Protein 651	BLAST_DGAL_SALTY D-galactose-binding periplasmic protein OS=Salmonella typhimurium (strain LT2 / SGSC1412 / ATCC 700720) GN=mglB PE=1 SV=2_P23905	3D-structure;Calcium;Chemotaxis;Complete proteome;Metal-binding;Periplasm;Reference proteome;Signal;Sugar transport;Transport;	;	;K10540;	Unknown SUPERKINGDOM	Unknown KINGDOM	Unknown PHYLUM	Unknown CLASS	Unknown ORDER	Unknown FAMILY	Unknown GENUS	Unknown SPECIES	Unknown SUBSPECIES	0	5	12	0	0	21	36	23	75	5	0	4	13	9	0	1	8	2	6	0	0	7	1	1	0	10	6	0	0	0	0	10	0	41	8	0
Meta-Protein 368	BLAST_DHE4_PRERU NAD(P)-specific glutamate dehydrogenase OS=Prevotella ruminicola GN=gdhA PE=1 SV=1_P95544	NAD;NADP;Oxidoreductase;	1.4.1.3;	;	Unknown SUPERKINGDOM	Unknown KINGDOM	Unknown PHYLUM	Unknown CLASS	Unknown ORDER	Unknown FAMILY	Unknown GENUS	Unknown SPECIES	Unknown SUBSPECIES	6	15	8	0	35	14	21	8	4	8	1	14	0	11	4	5	3	15	7	8	0	11	0	13	9	9	0	5	6	14	0	4	8	14	7	2
Meta-Protein 379	BLAST_GLNA3_DICDI Type-3 glutamine synthetase OS=Dictyostelium discoideum GN=glnA3 PE=1 SV=1_Q54WR9	ATP-binding;Complete proteome;Cytoplasm;Ligase;Magnesium;Metal-binding;Nucleotide-binding;Reference proteome;	6.3.1.2;	;K01915;	Unknown SUPERKINGDOM	Unknown KINGDOM	Unknown PHYLUM	Unknown CLASS	Unknown ORDER	Unknown FAMILY	Unknown GENUS	Unknown SPECIES	Unknown SUBSPECIES	5	5	15	8	2	5	10	15	11	12	4	7	3	13	7	9	13	7	4	6	3	3	2	2	5	16	4	6	4	3	3	1	8	59	5	1
Meta-Protein 174	BLAST_PDXB_SHESM Erythronate-4-phosphate dehydrogenase OS=Shewanella sp. (strain MR-4) GN=pdxB PE=3 SV=1_Q0HKB6	;3D-structure;ATP-binding;Acetylation;Alternative splicing;Amino-acid biosynthesis;Chloroplast;Complete proteome;Cytoplasm;Direct protein sequencing;Isopeptide bond;NAD;NADP;Nucleotide-binding;Oxidoreductase;Phosphoprotein;Plastid;Pyridoxine biosynthesis;Reference proteome;Serine biosynthesis;Transit peptide;Ubl conjugation;	;1.1.1.26;1.1.1.28;1.1.1.29;1.1.1.290;1.1.1.37;1.1.1.399;1.1.1.81;1.1.1.95;1.17.1.9;	;K00015;K00018;K00058;K03473;K03778;	Unknown SUPERKINGDOM	Unknown KINGDOM	Unknown PHYLUM	Unknown CLASS	Unknown ORDER	Unknown FAMILY	Unknown GENUS	Unknown SPECIES	Unknown SUBSPECIES	4	1	9	0	1	4	11	2	6	0	0	8	0	0	5	8	0	6	4	1	0	35	8	0	30	3	0	7	20	4	0	0	18	34	2	0
Meta-Protein 1380	MDH_CITK8 Malate dehydrogenase OS=Citrobacter koseri (strain ATCC BAA-895 / CDC 4225-83 / SGSC4696) GN=mdh PE=3 SV=1	3D-structure;Complete proteome;Direct protein sequencing;NAD;Oxidoreductase;Reference proteome;Tricarboxylic acid cycle;	1.1.1.37;	;K00024;	Unknown SUPERKINGDOM	Unknown KINGDOM	Unknown PHYLUM	Unknown CLASS	Unknown ORDER	Unknown FAMILY	Unknown GENUS	Unknown SPECIES	Unknown SUBSPECIES	0	0	2	0	0	0	1	31	0	1	0	0	0	0	0	0	0	0	0	0	4	34	0	0	25	0	0	0	0	0	0	0	0	0	0	17
Meta-Protein 1013	BLAST_KPYK_LACLA Pyruvate kinase OS=Lactococcus lactis subsp. lactis (strain IL1403) GN=pyk PE=3 SV=2_Q07637	ATP-binding;Allosteric enzyme;Complete proteome;Glycolysis;Kinase;Magnesium;Metal-binding;Nucleotide-binding;Potassium;Pyruvate;Reference proteome;Transferase;	2.7.1.40;	K00873;	Unknown SUPERKINGDOM	Unknown KINGDOM	Unknown PHYLUM	Unknown CLASS	Unknown ORDER	Unknown FAMILY	Unknown GENUS	Unknown SPECIES	Unknown SUBSPECIES	0	0	4	0	0	0	28	0	0	6	0	7	0	0	0	0	0	0	0	0	51	0	0	0	10	0	7	22	0	0	2	0	0	0	2	0
Meta-Protein 154	BLAST_UXAC_EUBE2 Uronate isomerase OS=Eubacterium eligens (strain ATCC 27750 / VPI C15-48) GN=uxaC PE=3 SV=1_C4Z5P8	Complete proteome;Isomerase;Reference proteome;	5.3.1.12;	K01812;	Unknown SUPERKINGDOM	Unknown KINGDOM	Unknown PHYLUM	Unknown CLASS	Unknown ORDER	Unknown FAMILY	Unknown GENUS	Unknown SPECIES	Unknown SUBSPECIES	0	7	6	1	24	8	20	7	9	0	0	6	3	2	0	1	7	2	0	7	0	0	0	10	0	2	2	0	0	0	0	18	0	16	17	0
Meta-Protein 1644	Metagenome unknown	ATP-binding;Allosteric enzyme;Direct protein sequencing;Glycolysis;Kinase;Magnesium;Metal-binding;Nucleotide-binding;Potassium;Pyruvate;Transferase;	2.7.1.40;	;	Unknown SUPERKINGDOM	Unknown KINGDOM	Unknown PHYLUM	Unknown CLASS	Unknown ORDER	Unknown FAMILY	Unknown GENUS	Unknown SPECIES	Unknown SUBSPECIES	0	0	0	0	0	0	0	0	0	0	0	0	0	0	0	0	0	0	0	9	73	0	0	0	0	0	14	108	0	0	0	0	0	0	0	0
Meta-Protein 426	BLAST_FUCO_ECOLI Lactaldehyde reductase OS=Escherichia coli (strain K12) GN=fucO PE=1 SV=2_P0A9S1	3D-structure;Carbohydrate metabolism;Complete proteome;Fucose metabolism;Iron;Metal-binding;NAD;Oxidoreductase;Reference proteome;	1.1.1.77;	K00048;	Unknown SUPERKINGDOM	Unknown KINGDOM	Unknown PHYLUM	Unknown CLASS	Unknown ORDER	Unknown FAMILY	Unknown GENUS	Unknown SPECIES	Unknown SUBSPECIES	0	8	15	0	2	18	17	14	40	5	0	11	10	0	0	0	15	1	0	4	0	6	0	3	0	18	6	0	1	9	0	2	3	34	5	0
Meta-Protein 12868	BLAST_RCC2_HUMAN Protein RCC2 OS=Homo sapiens GN=RCC2 PE=1 SV=2_Q9P258	3D-structure;Acetylation;Cell cycle;Cell division;Centromere;Chromosome;Complete proteome;Cytoplasm;Cytoskeleton;Microtubule;Mitosis;Nucleus;Phosphoprotein;Reference proteome;Repeat;	;	;	Eukaryota	Metazoa	Chordata	Mammalia	Primates	Hominidae	Homo	Homo sapiens	Unknown SUBSPECIES	7	4	1	4	8	3	5	6	4	4	5	4	6	6	4	3	4	2	4	6	11	3	3	7	5	4	9	8	6	4	4	11	10	5	7	4
Meta-Protein 12806	BLAST_YNBB_BACSU Uncharacterized protein YnbB OS=Bacillus subtilis (strain 168) GN=ynbB PE=4 SV=2_P94479	Complete proteome;Reference proteome;	;	;	Bacteria	Unknown KINGDOM	Firmicutes	Bacilli	Bacillales	Bacillaceae	Bacillus	Bacillus subtilis subsp. subtilis str. 168	Bacillus subtilis subsp. subtilis	8	10	6	9	8	6	6	5	7	7	6	7	8	7	3	5	7	5	5	8	7	0	8	4	4	5	3	5	5	6	6	6	5	5	10	3
Meta-Protein 1162	BLAST_RS2_BIFAA 30S ribosomal protein S2 OS=Bifidobacterium adolescentis (strain ATCC 15703 / DSM 20083 / NCTC 11814 / E194a) GN=rpsB PE=3 SV=2_A1A1H9	Complete proteome;RNA-binding;Reference proteome;Ribonucleoprotein;Ribosomal protein;rRNA-binding;	;	;K02939;K02967;	Bacteria	Unknown KINGDOM	Unknown PHYLUM	Unknown CLASS	Unknown ORDER	Unknown FAMILY	Unknown GENUS	Unknown SPECIES	Unknown SUBSPECIES	9	22	8	11	27	22	65	11	18	5	9	2	26	25	0	0	1	0	0	3	0	0	22	0	12	10	11	4	0	0	14	20	12	0	17	0
Meta-Protein 202	BLAST_MYL6_RAT Myosin light polypeptide 6 OS=Rattus norvegicus GN=Myl6 PE=1 SV=3_Q64119	3D-structure;Acetylation;Alternative splicing;Cardiomyopathy;Complete proteome;Direct protein sequencing;Disease mutation;Methylation;Motor protein;Muscle protein;Myosin;Phosphoprotein;Polymorphism;Reference proteome;Repeat;	;	;K05738;K12749;K12751;	Eukaryota	Metazoa	Chordata	Unknown CLASS	Unknown ORDER	Unknown FAMILY	Unknown GENUS	Unknown SPECIES	Unknown SUBSPECIES	0	1	0	1	0	1	10	1	19	0	0	1	0	6	0	0	0	0	0	7	0	9	0	10	0	6	20	21	0	17	7	1	6	0	0	0
Meta-Protein 12805	Metagenome unknown				Unknown SUPERKINGDOM	Unknown KINGDOM	Unknown PHYLUM	Unknown CLASS	Unknown ORDER	Unknown FAMILY	Unknown GENUS	Unknown SPECIES	Unknown SUBSPECIES	8	10	6	9	8	6	6	5	7	7	6	7	8	7	3	5	7	4	5	8	7	0	8	4	4	5	3	4	5	6	6	6	5	5	10	4
Meta-Protein 15336	BLAST_YDJI_BACSU Uncharacterized protein YdjI OS=Bacillus subtilis (strain 168) GN=ydjI PE=4 SV=1_O34789	Complete proteome;Reference proteome;	;	;	Bacteria	Unknown KINGDOM	Firmicutes	Bacilli	Bacillales	Bacillaceae	Bacillus	Bacillus subtilis subsp. subtilis str. 168	Bacillus subtilis subsp. subtilis	23	9	6	2	28	7	9	6	7	7	4	7	0	6	1	4	2	1	7	1	41	0	0	1	24	2	4	10	40	0	6	8	4	7	0	12
Meta-Protein 506	ANXA2_RAT Annexin A2 OS=Rattus norvegicus GN=Anxa2 PE=1 SV=2	3D-structure;Acetylation;Alternative splicing;Annexin;Basement membrane;Calcium;Calcium/phospholipid-binding;Complete proteome;Direct protein sequencing;Extracellular matrix;Isopeptide bond;Phosphoprotein;Polymorphism;RNA-binding;Reference proteome;Repeat;Secreted;Ubl conjugation;	;	;K17092;	Unknown SUPERKINGDOM	Unknown KINGDOM	Unknown PHYLUM	Unknown CLASS	Unknown ORDER	Unknown FAMILY	Unknown GENUS	Unknown SPECIES	Unknown SUBSPECIES	28	0	0	0	0	20	0	15	0	2	0	0	1	1	0	1	8	2	1	0	42	20	13	76	21	0	2	21	0	0	23	2	0	0	5	6
Meta-Protein 878	KLK1_PAPHA Kallikrein-1 OS=Papio hamadryas GN=KLK1 PE=2 SV=1	3D-structure;Alternative splicing;Calcium;Complete proteome;Digestion;Direct protein sequencing;Disulfide bond;Glycoprotein;Hydrolase;Metal-binding;Polymorphism;Protease;Reference proteome;Secreted;Serine protease;Signal;Zymogen;	3.4.21.35;3.4.21.4;	;K01325;	Eukaryota	Metazoa	Chordata	Mammalia	Unknown ORDER	Unknown FAMILY	Unknown GENUS	Unknown SPECIES	Unknown SUBSPECIES	0	5	9	1	12	14	12	14	20	11	0	14	4	10	0	0	1	0	0	0	14	1	3	3	21	4	3	4	1	6	3	10	4	0	6	7
Meta-Protein 689	BLAST_YITJ_BACSU Bifunctional homocysteine S-methyltransferase/5,10-methylenetetrahydrofolate reductase OS=Bacillus subtilis (strain 168) GN=yitJ PE=2 SV=1_O06745	Amino-acid biosynthesis;Complete proteome;FAD;Flavoprotein;Metal-binding;Methionine biosynthesis;Methyltransferase;NAD;NADP;Oxidoreductase;Reference proteome;S-adenosyl-L-methionine;Transferase;Zinc;	1.5.1.20;2.1.1.10;	K00297;K00547;	Unknown SUPERKINGDOM	Unknown KINGDOM	Unknown PHYLUM	Unknown CLASS	Unknown ORDER	Unknown FAMILY	Unknown GENUS	Unknown SPECIES	Unknown SUBSPECIES	4	5	3	3	6	3	8	2	11	5	1	12	1	0	0	0	0	3	0	0	0	0	12	0	0	21	6	5	0	15	0	7	0	16	16	0
Meta-Protein 16	BLAST_RS19_HALOH 30S ribosomal protein S19 OS=Halothermothrix orenii (strain H 168 / OCM 544 / DSM 9562) GN=rpsS PE=3 SV=1_B8D0C8	3D-structure;Complete proteome;FAD;Flavoprotein;Oxidoreductase;RNA-binding;Reference proteome;Ribonucleoprotein;Ribosomal protein;rRNA-binding;	;1.1.3.10;	;K02890;K02965;	Unknown SUPERKINGDOM	Unknown KINGDOM	Unknown PHYLUM	Unknown CLASS	Unknown ORDER	Unknown FAMILY	Unknown GENUS	Unknown SPECIES	Unknown SUBSPECIES	12	17	4	0	10	19	28	17	17	13	4	23	0	20	1	2	4	0	0	0	4	1	0	2	6	4	1	6	2	0	6	0	0	8	0	2
Meta-Protein 1263	Metagenome unknown	3D-structure;Complete proteome;Direct protein sequencing;Disulfide bond;Glycoprotein;Lectin;Polymorphism;Pyrrolidone carboxylic acid;Reference proteome;Secreted;Signal;	;	;	Unknown SUPERKINGDOM	Unknown KINGDOM	Unknown PHYLUM	Unknown CLASS	Unknown ORDER	Unknown FAMILY	Unknown GENUS	Unknown SPECIES	Unknown SUBSPECIES	36	0	0	0	0	0	0	0	0	0	0	0	0	0	5	0	0	0	0	0	0	0	0	0	1	0	0	0	0	0	7	7	0	0	14	0
Meta-Protein 1247	BLAST_LAMB_PHOLL Maltoporin OS=Photorhabdus luminescens subsp. laumondii (strain DSM 15139 / CIP 105565 / TT01) GN=lamB PE=3 SV=1_Q7N987	3D-structure;Cell outer membrane;Complete proteome;Disulfide bond;Host cell receptor for virus entry;Host-virus interaction;Ion transport;Membrane;Porin;Receptor;Reference proteome;Signal;Sugar transport;Transmembrane;Transmembrane beta strand;Transport;	;	;K02024;	Unknown SUPERKINGDOM	Unknown KINGDOM	Unknown PHYLUM	Unknown CLASS	Unknown ORDER	Unknown FAMILY	Unknown GENUS	Unknown SPECIES	Unknown SUBSPECIES	0	0	0	0	0	0	0	0	0	0	0	0	0	0	0	0	0	0	0	0	17	70	0	0	0	0	0	0	0	2	0	0	0	0	0	24
Meta-Protein 512	Metagenome unknown	3D-structure;Cell membrane;Complete proteome;Lipoprotein;Membrane;Palmitate;Reference proteome;Signal;Sugar transport;Transport;	;	K10439;	Unknown SUPERKINGDOM	Unknown KINGDOM	Unknown PHYLUM	Unknown CLASS	Unknown ORDER	Unknown FAMILY	Unknown GENUS	Unknown SPECIES	Unknown SUBSPECIES	11	8	9	4	35	15	41	5	4	2	0	3	4	9	0	2	6	2	7	6	0	0	0	0	0	1	4	1	0	0	1	6	0	0	4	0
Meta-Protein 255	BLAST_CH60_STRS7 60 kDa chaperonin OS=Streptococcus equi subsp. zooepidemicus (strain H70) GN=groL PE=3 SV=1_C0MES3	ATP-binding;Chaperone;Complete proteome;Cytoplasm;Nucleotide-binding;Reference proteome;	;	K04077;	Bacteria	Unknown KINGDOM	Unknown PHYLUM	Unknown CLASS	Unknown ORDER	Unknown FAMILY	Unknown GENUS	Unknown SPECIES	Unknown SUBSPECIES	0	2	2	0	0	0	82	0	6	0	0	26	0	0	1	0	0	1	0	3	87	0	0	0	11	14	0	1	0	0	33	0	0	3	1	0
Meta-Protein 12811	RECF_OPITP DNA replication and repair protein RecF OS=Opitutus terrae (strain DSM 11246 / JCM 15787 / PB90-1) GN=recF PE=3 SV=1	ATP-binding;Complete proteome;Cytoplasm;DNA damage;DNA repair;DNA replication;DNA-binding;Nucleotide-binding;Reference proteome;SOS response;	;	K03629;	Bacteria	Unknown KINGDOM	Verrucomicrobia	Opitutae	Unknown ORDER	Opitutaceae	Opitutus	Opitutus terrae	Opitutus terrae PB90-1	8	10	6	9	8	6	5	5	7	6	6	7	7	7	1	5	7	3	4	8	7	0	8	4	4	5	3	4	5	6	6	6	5	5	10	3
Meta-Protein 12813	Metagenome unknown				Unknown SUPERKINGDOM	Unknown KINGDOM	Unknown PHYLUM	Unknown CLASS	Unknown ORDER	Unknown FAMILY	Unknown GENUS	Unknown SPECIES	Unknown SUBSPECIES	8	10	6	8	8	6	5	5	7	6	6	7	7	7	1	5	7	3	4	8	7	0	8	4	4	5	3	4	5	6	6	6	5	5	10	3
Meta-Protein 2384	Metagenome unknown				Unknown SUPERKINGDOM	Unknown KINGDOM	Unknown PHYLUM	Unknown CLASS	Unknown ORDER	Unknown FAMILY	Unknown GENUS	Unknown SPECIES	Unknown SUBSPECIES	4	0	0	0	0	0	0	0	10	37	0	0	0	0	0	19	4	0	0	13	0	42	0	53	0	0	3	0	0	0	6	0	0	67	15	0
Meta-Protein 338	Metagenome unknown				Unknown SUPERKINGDOM	Unknown KINGDOM	Unknown PHYLUM	Unknown CLASS	Unknown ORDER	Unknown FAMILY	Unknown GENUS	Unknown SPECIES	Unknown SUBSPECIES	0	0	6	0	0	0	0	0	135	82	1	2	35	1	23	0	1	0	0	0	0	0	0	0	0	4	0	1	0	0	0	0	0	58	0	0
Meta-Protein 12808	BLAST_YFEC_YERPE Chelated iron transport system membrane protein YfeC OS=Yersinia pestis GN=yfeC PE=3 SV=1_Q56954	Cell inner membrane;Cell membrane;Complete proteome;Ion transport;Iron;Iron transport;Membrane;Reference proteome;Transmembrane;Transmembrane helix;Transport;	;	K11605;	Bacteria	Unknown KINGDOM	Proteobacteria	Gammaproteobacteria	Enterobacteriales	Enterobacteriaceae	Yersinia	Yersinia pestis	Unknown SUBSPECIES	8	10	6	9	8	6	6	5	7	7	6	7	8	7	3	3	6	3	4	8	7	0	8	4	4	5	3	4	5	6	6	6	5	5	10	3
Meta-Protein 15480	Metagenome unknown				Unknown SUPERKINGDOM	Unknown KINGDOM	Unknown PHYLUM	Unknown CLASS	Unknown ORDER	Unknown FAMILY	Unknown GENUS	Unknown SPECIES	Unknown SUBSPECIES	0	0	5	0	0	0	20	0	0	7	0	0	5	0	0	0	12	0	0	17	0	3	0	0	0	44	0	0	0	0	0	0	0	0	0	0
Meta-Protein 12869	Metagenome unknown				Unknown SUPERKINGDOM	Unknown KINGDOM	Unknown PHYLUM	Unknown CLASS	Unknown ORDER	Unknown FAMILY	Unknown GENUS	Unknown SPECIES	Unknown SUBSPECIES	7	4	0	4	8	3	5	6	3	4	5	4	6	6	4	6	3	3	5	5	11	3	3	6	5	3	8	8	6	3	4	10	9	5	5	3
Meta-Protein 405	BLAST_KCRM_HUMAN Creatine kinase M-type OS=Homo sapiens GN=CKM PE=1 SV=2_P06732	3D-structure;ATP-binding;Acetylation;Allergen;Alternative splicing;Complete proteome;Cytoplasm;Direct protein sequencing;Kinase;Nitration;Nucleotide-binding;Phosphoprotein;Polymorphism;Reference proteome;Transferase;	2.7.3.2;2.7.3.3;	;K00933;	Unknown SUPERKINGDOM	Unknown KINGDOM	Unknown PHYLUM	Unknown CLASS	Unknown ORDER	Unknown FAMILY	Unknown GENUS	Unknown SPECIES	Unknown SUBSPECIES	0	2	0	0	0	0	12	0	20	0	0	3	1	10	0	0	3	0	0	0	0	7	0	21	5	6	8	10	0	10	8	1	0	1	0	0
Meta-Protein 1208	CH60_GARVA 60 kDa chaperonin OS=Gardnerella vaginalis GN=groL PE=3 SV=2	ATP-binding;Chaperone;Complete proteome;Cytoplasm;Nucleotide-binding;Reference proteome;	;	;K04077;	Unknown SUPERKINGDOM	Unknown KINGDOM	Unknown PHYLUM	Unknown CLASS	Unknown ORDER	Unknown FAMILY	Unknown GENUS	Unknown SPECIES	Unknown SUBSPECIES	0	23	6	3	11	23	96	6	35	4	0	0	21	25	0	0	2	2	0	5	0	3	4	0	5	9	2	0	0	1	3	9	45	0	3	0
Meta-Protein 91	CAH1_HUMAN Carbonic anhydrase 1 OS=Homo sapiens GN=CA1 PE=1 SV=2	3D-structure;Acetylation;Complete proteome;Cytoplasm;Direct protein sequencing;Lyase;Metal-binding;Polymorphism;Reference proteome;Zinc;	4.2.1.1;	;K01672;	Eukaryota	Metazoa	Chordata	Mammalia	Primates	Unknown FAMILY	Unknown GENUS	Unknown SPECIES	Unknown SUBSPECIES	2	1	8	0	4	25	13	13	7	0	0	0	0	2	0	0	0	0	0	10	27	23	0	60	79	0	0	0	0	2	0	0	0	0	3	10
Meta-Protein 906	PIP_HUMAN Prolactin-inducible protein OS=Homo sapiens GN=PIP PE=1 SV=1	3D-structure;Actin-binding;Complete proteome;Direct protein sequencing;Disulfide bond;Glycoprotein;Polymorphism;Pyrrolidone carboxylic acid;Reference proteome;Secreted;Signal;	;	;	Eukaryota	Metazoa	Chordata	Mammalia	Primates	Unknown FAMILY	Unknown GENUS	Unknown SPECIES	Unknown SUBSPECIES	0	0	0	0	5	0	0	0	0	0	0	0	0	0	0	0	0	0	0	5	0	0	0	2	11	0	9	8	0	0	0	0	0	0	0	4
Meta-Protein 972	FRUE_BIFLO Fructose import binding protein FruE OS=Bifidobacterium longum (strain NCC 2705) GN=fruE PE=1 SV=1	Cell membrane;Complete proteome;Lipoprotein;Membrane;Palmitate;Reference proteome;Signal;Sugar transport;Transport;	;	K02058;	Unknown SUPERKINGDOM	Unknown KINGDOM	Unknown PHYLUM	Unknown CLASS	Unknown ORDER	Unknown FAMILY	Unknown GENUS	Unknown SPECIES	Unknown SUBSPECIES	10	15	2	12	9	14	46	26	16	30	0	0	21	31	0	0	0	0	1	0	0	0	23	0	0	0	0	20	0	0	6	4	14	2	7	0
Meta-Protein 7518	Metagenome unknown				Unknown SUPERKINGDOM	Unknown KINGDOM	Unknown PHYLUM	Unknown CLASS	Unknown ORDER	Unknown FAMILY	Unknown GENUS	Unknown SPECIES	Unknown SUBSPECIES	6	4	4	6	5	10	3	20	17	5	3	20	2	0	4	4	9	3	4	9	3	3	6	3	4	13	5	4	4	5	5	0	9	9	6	0
Meta-Protein 85	BLAST_EFG_THETH Elongation factor G OS=Thermus thermophilus GN=fusA PE=1 SV=1_P13551	3D-structure;Acetylation;Antibiotic resistance;Complete proteome;Cytoplasm;Direct protein sequencing;Elongation factor;GTP-binding;Mitochondrion;Nucleotide-binding;Phosphoprotein;Protein biosynthesis;Reference proteome;Transit peptide;	;	;K02355;K18220;	Unknown SUPERKINGDOM	Unknown KINGDOM	Unknown PHYLUM	Unknown CLASS	Unknown ORDER	Unknown FAMILY	Unknown GENUS	Unknown SPECIES	Unknown SUBSPECIES	1	6	3	0	0	8	0	2	3	0	0	9	0	0	2	1	1	13	0	0	0	82	7	5	5	1	0	0	1	4	0	0	3	36	0	0
Meta-Protein 1130	BLAST_FTN_BACF6 Bacterial non-heme ferritin OS=Bacteroides fragilis (strain 638R) GN=ftnA PE=2 SV=1_E1WS50	Complete proteome;Direct protein sequencing;Iron;Iron storage;Metal-binding;Oxidoreductase;	1.16.3.2;	K02217;	Unknown SUPERKINGDOM	Unknown KINGDOM	Unknown PHYLUM	Unknown CLASS	Unknown ORDER	Unknown FAMILY	Unknown GENUS	Unknown SPECIES	Unknown SUBSPECIES	2	4	8	16	6	3	9	13	3	2	3	25	6	0	9	3	2	0	0	9	0	0	8	7	0	1	19	0	4	36	0	8	15	16	9	0
Meta-Protein 821	BLAST_ADHE_ECOLI Aldehyde-alcohol dehydrogenase OS=Escherichia coli (strain K12) GN=adhE PE=1 SV=2_P0A9Q7	Acetylation;Complete proteome;Direct protein sequencing;Iron;Multifunctional enzyme;NAD;Oxidoreductase;Reference proteome;	1.1.1.1;1.1.1.61;1.2.1.10;	K04072;K18120;	Unknown SUPERKINGDOM	Unknown KINGDOM	Unknown PHYLUM	Unknown CLASS	Unknown ORDER	Unknown FAMILY	Unknown GENUS	Unknown SPECIES	Unknown SUBSPECIES	0	69	0	0	0	14	0	83	0	0	0	25	0	0	0	0	17	6	0	0	0	0	0	0	0	0	0	0	0	5	0	0	0	97	0	0
Meta-Protein 955	BLAST_ANCA_CLOTH Cellulosome-anchoring protein OS=Clostridium thermocellum (strain ATCC 27405 / DSM 1237 / NBRC 103400 / NCIMB 10682 / NRRL B-4536 / VPI 7372) GN=ancA PE=1 SV=1_Q06848	3D-structure;Carbohydrate metabolism;Cell wall;Cellulose degradation;Complete proteome;Polysaccharide degradation;Reference proteome;Repeat;S-layer;Secreted;Signal;	;	;	Unknown SUPERKINGDOM	Unknown KINGDOM	Unknown PHYLUM	Unknown CLASS	Unknown ORDER	Unknown FAMILY	Unknown GENUS	Unknown SPECIES	Unknown SUBSPECIES	0	4	6	0	7	15	0	61	0	11	4	0	0	0	0	0	4	6	0	9	0	0	0	22	0	0	0	0	0	16	0	0	0	0	0	1
Meta-Protein 565	BLAST_RL4_BACV8 50S ribosomal protein L4 OS=Bacteroides vulgatus (strain ATCC 8482 / DSM 1447 / JCM 5826 / NBRC 14291 / NCTC 11154) GN=rplD PE=3 SV=1_A6KYJ4	Complete proteome;RNA-binding;Reference proteome;Ribonucleoprotein;Ribosomal protein;rRNA-binding;	;	K02926;	Unknown SUPERKINGDOM	Unknown KINGDOM	Unknown PHYLUM	Unknown CLASS	Unknown ORDER	Unknown FAMILY	Unknown GENUS	Unknown SPECIES	Unknown SUBSPECIES	0	0	0	3	3	12	20	0	0	0	0	0	0	11	2	0	0	13	2	1	0	23	9	6	17	0	7	4	21	0	0	7	11	4	7	18
Meta-Protein 13935	Metagenome unknown				Unknown SUPERKINGDOM	Unknown KINGDOM	Unknown PHYLUM	Unknown CLASS	Unknown ORDER	Unknown FAMILY	Unknown GENUS	Unknown SPECIES	Unknown SUBSPECIES	4	2	3	5	6	3	2	5	5	2	1	3	13	11	2	4	4	1	3	2	13	1	10	3	12	1	8	10	10	5	13	5	13	1	4	5
Meta-Protein 1670	Metagenome unknown				Unknown SUPERKINGDOM	Unknown KINGDOM	Unknown PHYLUM	Unknown CLASS	Unknown ORDER	Unknown FAMILY	Unknown GENUS	Unknown SPECIES	Unknown SUBSPECIES	0	4	2	6	0	0	0	0	0	0	0	7	2	0	11	10	0	0	4	0	0	0	25	0	42	0	0	2	26	24	0	2	20	17	0	7
Meta-Protein 13135	Metagenome unknown				Unknown SUPERKINGDOM	Unknown KINGDOM	Unknown PHYLUM	Unknown CLASS	Unknown ORDER	Unknown FAMILY	Unknown GENUS	Unknown SPECIES	Unknown SUBSPECIES	4	3	2	3	7	3	4	6	3	4	4	1	6	0	2	0	1	1	1	2	14	1	6	7	5	1	11	11	6	0	2	9	7	5	14	6
Meta-Protein 680	BLAST_INO1_MAIZE Inositol-3-phosphate synthase OS=Zea mays PE=2 SV=2_Q9FPK7	Alternative splicing;Complete proteome;Cytoplasm;Inositol biosynthesis;Isomerase;Lipid biosynthesis;Lipid metabolism;NAD;Phospholipid biosynthesis;Phospholipid metabolism;Phosphoprotein;Reference proteome;	5.5.1.4;	;K01858;	Unknown SUPERKINGDOM	Unknown KINGDOM	Unknown PHYLUM	Unknown CLASS	Unknown ORDER	Unknown FAMILY	Unknown GENUS	Unknown SPECIES	Unknown SUBSPECIES	0	0	2	0	2	4	6	0	0	2	0	0	0	2	1	0	0	1	0	3	0	13	7	17	1	5	0	8	0	8	0	8	0	12	10	4
Meta-Protein 781	BLAST_YQEN_BACSU Uncharacterized protein YqeN OS=Bacillus subtilis (strain 168) GN=yqeN PE=1 SV=1_P54459	3D-structure;Complete proteome;Pyridoxal phosphate;Reference proteome;Transferase;	;2.8.1.7;	;K02340;K11717;	Bacteria	Unknown KINGDOM	Unknown PHYLUM	Unknown CLASS	Unknown ORDER	Unknown FAMILY	Unknown GENUS	Unknown SPECIES	Unknown SUBSPECIES	7	2	0	3	7	3	5	3	3	3	5	4	6	4	1	1	3	1	3	3	14	2	3	7	5	4	10	10	6	4	4	10	9	5	6	4
Meta-Protein 226	BLAST_KDGK_THET8 2-dehydro-3-deoxygluconokinase OS=Thermus thermophilus (strain HB8 / ATCC 27634 / DSM 579) GN=kdgK PE=1 SV=1_Q53W83	3D-structure;ATP-binding;Carbohydrate metabolism;Complete proteome;Kinase;Nucleotide-binding;Plasmid;Reference proteome;Transferase;	2.7.1.45;	K00874;	Unknown SUPERKINGDOM	Unknown KINGDOM	Unknown PHYLUM	Unknown CLASS	Unknown ORDER	Unknown FAMILY	Unknown GENUS	Unknown SPECIES	Unknown SUBSPECIES	0	3	4	0	0	7	7	7	15	2	0	2	3	5	0	7	11	7	8	0	0	14	0	20	0	22	3	0	0	0	0	2	0	15	3	0
Meta-Protein 537	BLAST_ZA2G_HUMAN Zinc-alpha-2-glycoprotein OS=Homo sapiens GN=AZGP1 PE=1 SV=2_P25311	3D-structure;Complete proteome;Direct protein sequencing;Disulfide bond;Glycoprotein;Pyrrolidone carboxylic acid;Reference proteome;Secreted;Signal;	;	;	Unknown SUPERKINGDOM	Unknown KINGDOM	Unknown PHYLUM	Unknown CLASS	Unknown ORDER	Unknown FAMILY	Unknown GENUS	Unknown SPECIES	Unknown SUBSPECIES	0	1	8	0	0	9	5	6	4	6	0	0	0	0	1	0	0	0	0	1	4	4	0	2	27	5	22	4	0	0	18	0	7	0	1	2
Meta-Protein 1103	BLAST_PHK_CLOAB Probable phosphoketolase OS=Clostridium acetobutylicum (strain ATCC 824 / DSM 792 / JCM 1419 / LMG 5710 / VKM B-1787) GN=CA_C1343 PE=3 SV=1_Q97JE3	Complete proteome;Lyase;Reference proteome;Thiamine pyrophosphate;	4.1.2.-;	K01621;	Unknown SUPERKINGDOM	Unknown KINGDOM	Unknown PHYLUM	Unknown CLASS	Unknown ORDER	Unknown FAMILY	Unknown GENUS	Unknown SPECIES	Unknown SUBSPECIES	61	46	5	1	22	26	3	17	0	30	0	0	0	7	0	0	10	0	0	2	0	0	0	0	0	4	0	1	0	0	0	1	0	0	23	0
Meta-Protein 1221	BLAST_FLIC_SERMA Flagellin OS=Serratia marcescens GN=fliC PE=3 SV=1_P13713	Bacterial flagellum;Direct protein sequencing;Secreted;	;	;	Unknown SUPERKINGDOM	Unknown KINGDOM	Unknown PHYLUM	Unknown CLASS	Unknown ORDER	Unknown FAMILY	Unknown GENUS	Unknown SPECIES	Unknown SUBSPECIES	0	9	10	0	6	18	0	9	27	2	0	12	0	0	3	0	0	0	1	2	0	27	0	1	2	23	8	7	0	2	14	1	5	18	2	0
Meta-Protein 1396	Metagenome unknown	3D-structure;Complete proteome;Lyase;Reference proteome;	4.3.1.1;	;K01744;	Unknown SUPERKINGDOM	Unknown KINGDOM	Unknown PHYLUM	Unknown CLASS	Unknown ORDER	Unknown FAMILY	Unknown GENUS	Unknown SPECIES	Unknown SUBSPECIES	0	0	0	0	0	0	0	0	0	0	0	0	0	0	0	0	0	0	0	0	5	101	0	0	4	0	0	0	0	0	0	0	0	0	0	76
Meta-Protein 858	BLAST_GUNF_CLOCE Endoglucanase F OS=Clostridium cellulolyticum (strain ATCC 35319 / DSM 5812 / JCM 6584 / H10) GN=celCCF PE=1 SV=2_P37698	3D-structure;Calcium;Carbohydrate metabolism;Cellulose degradation;Complete proteome;Disulfide bond;Glycosidase;Hydrolase;Lyase;Metal-binding;Polysaccharide degradation;Reference proteome;Repeat;Secreted;Signal;	3.2.1.4;4.2.2.2;	;	Unknown SUPERKINGDOM	Unknown KINGDOM	Unknown PHYLUM	Unknown CLASS	Unknown ORDER	Unknown FAMILY	Unknown GENUS	Unknown SPECIES	Unknown SUBSPECIES	0	20	2	0	30	2	5	28	31	0	0	0	1	0	0	0	16	0	0	7	0	27	0	4	0	0	0	0	0	0	0	0	0	0	0	0
Meta-Protein 527	BLAST_PNP_BACTN Polyribonucleotide nucleotidyltransferase OS=Bacteroides thetaiotaomicron (strain ATCC 29148 / DSM 2079 / NCTC 10582 / E50 / VPI-5482) GN=pnp PE=3 SV=1_Q8A4N6	3D-structure;Complete proteome;Cytoplasm;Magnesium;Metal-binding;Nucleotidyltransferase;RNA-binding;Reference proteome;Transferase;	2.7.7.8;	K00962;	Unknown SUPERKINGDOM	Unknown KINGDOM	Unknown PHYLUM	Unknown CLASS	Unknown ORDER	Unknown FAMILY	Unknown GENUS	Unknown SPECIES	Unknown SUBSPECIES	0	1	0	0	2	24	50	1	3	0	0	1	0	0	1	0	0	12	2	0	3	36	0	9	1	2	0	3	0	0	0	1	0	14	2	4
Meta-Protein 1751	Metagenome unknown				Unknown SUPERKINGDOM	Unknown KINGDOM	Unknown PHYLUM	Unknown CLASS	Unknown ORDER	Unknown FAMILY	Unknown GENUS	Unknown SPECIES	Unknown SUBSPECIES	0	0	0	0	9	5	0	0	3	11	0	0	6	6	0	0	20	12	0	1	0	0	0	0	0	0	9	0	0	0	0	25	0	0	0	0
Meta-Protein 14308	BLAST_MGTA_MYCS2 GDP-mannose-dependent alpha-mannosyltransferase OS=Mycobacterium smegmatis (strain ATCC 700084 / mc(2)155) GN=mgtA PE=3 SV=1_A0QRG8	Complete proteome;Glycosyltransferase;Lipid biosynthesis;Lipid metabolism;Phospholipid biosynthesis;Phospholipid metabolism;Reference proteome;Transferase;Virulence;	2.4.1.-;	K12583;	Bacteria	Unknown KINGDOM	Actinobacteria	Actinobacteria	Actinomycetales	Mycobacteriaceae	Mycobacterium	Mycobacterium smegmatis	Mycobacterium smegmatis str. MC2 155	4	6	5	2	2	9	4	7	7	7	3	7	8	0	4	4	4	5	4	9	17	5	4	3	6	7	4	7	4	7	2	5	6	7	3	0
Meta-Protein 466	BLAST_PGK_BACTN Phosphoglycerate kinase OS=Bacteroides thetaiotaomicron (strain ATCC 29148 / DSM 2079 / NCTC 10582 / E50 / VPI-5482) GN=pgk PE=3 SV=1_Q8A753	ATP-binding;Complete proteome;Cytoplasm;Glycolysis;Kinase;Nucleotide-binding;Reference proteome;Transferase;	2.7.2.3;	K00927;	Unknown SUPERKINGDOM	Unknown KINGDOM	Unknown PHYLUM	Unknown CLASS	Unknown ORDER	Unknown FAMILY	Unknown GENUS	Unknown SPECIES	Unknown SUBSPECIES	0	5	6	0	0	2	1	4	29	0	0	9	0	0	2	17	5	0	1	7	0	4	20	0	21	9	4	2	0	0	0	0	14	39	2	8
Meta-Protein 14315	BLAST_G3P_CORGL Glyceraldehyde-3-phosphate dehydrogenase OS=Corynebacterium glutamicum (strain ATCC 13032 / DSM 20300 / JCM 1318 / LMG 3730 / NCIMB 10025) GN=gap PE=3 SV=2_Q01651	Complete proteome;Cytoplasm;Glycolysis;NAD;Nucleotide-binding;Oxidoreductase;Reference proteome;	1.2.1.12;	K00134;	Bacteria	Unknown KINGDOM	Actinobacteria	Actinobacteria	Actinomycetales	Corynebacteriaceae	Corynebacterium	Corynebacterium glutamicum	Corynebacterium glutamicum ATCC 13032	10	8	6	5	9	7	9	8	12	8	4	8	5	8	6	8	7	5	6	8	6	4	5	0	2	12	2	6	0	7	4	3	6	7	3	0
Meta-Protein 180	LEG4_MOUSE Galectin-4 OS=Mus musculus GN=Lgals4 PE=1 SV=2	3D-structure;Complete proteome;Lectin;Phosphoprotein;Polymorphism;Reference proteome;Repeat;	;	K10091;	Eukaryota	Metazoa	Chordata	Mammalia	Unknown ORDER	Unknown FAMILY	Unknown GENUS	Unknown SPECIES	Unknown SUBSPECIES	0	0	0	0	0	0	0	4	0	0	0	0	0	0	1	0	0	0	0	0	8	8	13	50	13	1	0	2	0	0	0	6	0	5	10	6
Meta-Protein 28263	BLAST_LCFH_HAEIN Putative long-chain-fatty-acid--CoA ligase OS=Haemophilus influenzae (strain ATCC 51907 / DSM 11121 / KW20 / Rd) GN=HI_0002 PE=3 SV=1_P44446	ATP-binding;Complete proteome;Fatty acid metabolism;Ligase;Lipid metabolism;Nucleotide-binding;Reference proteome;	6.2.1.3;	K01897;	Bacteria	Unknown KINGDOM	Proteobacteria	Gammaproteobacteria	Pasteurellales	Pasteurellaceae	Haemophilus	Haemophilus influenzae	Haemophilus influenzae Rd KW20	0	4	0	0	0	0	4	0	4	0	1	6	0	4	0	0	3	0	0	10	0	0	3	16	0	8	5	14	0	2	7	9	5	3	0	0
Meta-Protein 266	BLAST_RS3_CLOB8 30S ribosomal protein S3 OS=Clostridium beijerinckii (strain ATCC 51743 / NCIMB 8052) GN=rpsC PE=3 SV=1_A6LPR7	Complete proteome;RNA-binding;Reference proteome;Ribonucleoprotein;Ribosomal protein;rRNA-binding;	;	K02982;	Unknown SUPERKINGDOM	Unknown KINGDOM	Unknown PHYLUM	Unknown CLASS	Unknown ORDER	Unknown FAMILY	Unknown GENUS	Unknown SPECIES	Unknown SUBSPECIES	11	13	4	0	4	15	9	14	18	8	0	13	5	12	0	6	21	2	12	0	0	5	0	0	0	15	0	0	0	0	4	15	0	18	4	0
Meta-Protein 102	BLAST_PHSG_THELN Maltodextrin phosphorylase OS=Thermococcus litoralis (strain ATCC 51850 / DSM 5473 / JCM 8560 / NS-C) GN=malP PE=1 SV=1_Q9YGA7	Allosteric enzyme;Carbohydrate metabolism;Complete proteome;Direct protein sequencing;Glycogen metabolism;Glycosyltransferase;Maltose metabolism;Pyridoxal phosphate;Reference proteome;Transferase;	2.4.1.1;	K00688;	Unknown SUPERKINGDOM	Unknown KINGDOM	Unknown PHYLUM	Unknown CLASS	Unknown ORDER	Unknown FAMILY	Unknown GENUS	Unknown SPECIES	Unknown SUBSPECIES	0	0	0	0	0	5	3	0	0	0	1	0	0	0	2	1	1	7	2	0	0	51	6	9	12	0	2	0	0	0	0	0	4	13	26	3
Meta-Protein 303	K2C8_HUMAN Keratin, type II cytoskeletal 8 OS=Homo sapiens GN=KRT8 PE=1 SV=7	3D-structure;Acetylation;Allergen;Alternative splicing;Cell membrane;Citrullination;Coiled coil;Complete proteome;Cytoplasm;Cytoskeleton;Direct protein sequencing;Disease mutation;Ectodermal dysplasia;Epidermolysis bullosa;Glycoprotein;Host-virus interaction;Ichthyosis;Intermediate filament;Isopeptide bond;Keratin;Leukodystrophy;Membrane;Methylation;Nucleus;Palmoplantar keratoderma;Phosphoprotein…	;	;K05640;K07605;	Unknown SUPERKINGDOM	Unknown KINGDOM	Unknown PHYLUM	Unknown CLASS	Unknown ORDER	Unknown FAMILY	Unknown GENUS	Unknown SPECIES	Unknown SUBSPECIES	48	7	10	3	12	2	4	6	5	4	0	2	0	2	1	1	1	3	1	0	7	0	18	104	10	0	0	0	0	0	4	0	1	1	3	1
Meta-Protein 2013	OTC_LACRD Ornithine carbamoyltransferase OS=Lactobacillus reuteri (strain DSM 20016) GN=arcB PE=3 SV=1	3D-structure;Amino-acid biosynthesis;Arginine biosynthesis;Arginine metabolism;Complete proteome;Cytoplasm;DNA integration;DNA recombination;DNA-binding;Direct protein sequencing;Plasmid;Reference proteome;Transferase;	;2.1.3.3;	;K00611;	Unknown SUPERKINGDOM	Unknown KINGDOM	Unknown PHYLUM	Unknown CLASS	Unknown ORDER	Unknown FAMILY	Unknown GENUS	Unknown SPECIES	Unknown SUBSPECIES	1	0	0	1	0	0	0	0	2	0	2	1	0	0	0	2	0	0	0	3	1	7	0	3	0	2	4	146	0	2	0	0	23	1	3	0
Meta-Protein 1679	Metagenome unknown	3D-structure;Cell wall;Complete proteome;Direct protein sequencing;Glycoprotein;Reference proteome;Repeat;S-layer;Secreted;Signal;	;	;	Unknown SUPERKINGDOM	Unknown KINGDOM	Unknown PHYLUM	Unknown CLASS	Unknown ORDER	Unknown FAMILY	Unknown GENUS	Unknown SPECIES	Unknown SUBSPECIES	0	14	0	0	0	0	0	118	0	0	0	0	0	0	5	31	0	1	0	0	0	0	0	0	0	0	9	0	0	0	0	0	88	0	0	0
Meta-Protein 840	BLAST_EUTE_SALTY Ethanolamine utilization protein EutE OS=Salmonella typhimurium (strain LT2 / SGSC1412 / ATCC 700720) GN=eutE PE=4 SV=2_P41793	Complete proteome;Oxidoreductase;Reference proteome;	;	K04021;	Unknown SUPERKINGDOM	Unknown KINGDOM	Unknown PHYLUM	Unknown CLASS	Unknown ORDER	Unknown FAMILY	Unknown GENUS	Unknown SPECIES	Unknown SUBSPECIES	20	8	3	9	14	3	7	5	5	2	0	5	9	11	0	1	7	3	1	0	0	2	9	1	3	14	1	11	2	22	0	1	16	4	0	2
Meta-Protein 1711	BLAST_TKT_MYCLE Transketolase OS=Mycobacterium leprae (strain TN) GN=tkt PE=3 SV=1_P46708	3D-structure;Acetylation;Calcium;Complete proteome;Magnesium;Metal-binding;Reference proteome;Thiamine pyrophosphate;Transferase;	2.2.1.1;	;K00615;	Unknown SUPERKINGDOM	Unknown KINGDOM	Unknown PHYLUM	Unknown CLASS	Unknown ORDER	Unknown FAMILY	Unknown GENUS	Unknown SPECIES	Unknown SUBSPECIES	0	21	3	3	18	22	94	7	16	4	0	0	13	30	0	0	0	2	0	0	0	0	15	0	7	0	3	2	0	0	3	14	21	0	21	0
Meta-Protein 261	BLAST_TPM3_MOUSE Tropomyosin alpha-3 chain OS=Mus musculus GN=Tpm3 PE=1 SV=3_P21107	3D-structure;Acetylation;Actin-binding;Alternative splicing;Calcium;Cardiomyopathy;Chromosomal rearrangement;Coiled coil;Complete proteome;Cytoplasm;Cytoskeleton;Direct protein sequencing;Disease mutation;Metal-binding;Muscle protein;Nemaline myopathy;Phosphoprotein;Polymorphism;Proto-oncogene;Reference proteome;Repeat;	;	;K09290;K10373;K10374;K10375;	Unknown SUPERKINGDOM	Unknown KINGDOM	Unknown PHYLUM	Unknown CLASS	Unknown ORDER	Unknown FAMILY	Unknown GENUS	Unknown SPECIES	Unknown SUBSPECIES	0	12	0	0	0	2	7	0	55	0	0	6	0	3	0	0	6	1	0	3	0	0	0	1	0	4	0	21	0	3	22	0	0	1	0	0
Meta-Protein 270	BLAST_SUSD_BACTN Starch-binding protein SusD OS=Bacteroides thetaiotaomicron (strain ATCC 29148 / DSM 2079 / NCTC 10582 / E50 / VPI-5482) GN=susD PE=1 SV=1_Q8A1G2	3D-structure;Calcium;Carbohydrate metabolism;Cell outer membrane;Complete proteome;Lipoprotein;Membrane;Metal-binding;Mitochondrion;Nucleotidyltransferase;Palmitate;RNA-directed DNA polymerase;Reference proteome;Signal;Transferase;	;2.7.7.48;	;K21572;	Unknown SUPERKINGDOM	Unknown KINGDOM	Unknown PHYLUM	Unknown CLASS	Unknown ORDER	Unknown FAMILY	Unknown GENUS	Unknown SPECIES	Unknown SUBSPECIES	0	0	3	0	101	2	1	0	3	1	0	2	0	0	0	0	0	0	0	3	3	0	0	0	2	0	3	3	0	0	2	0	0	0	61	0
Meta-Protein 13138	THIL_NITMS Thiamine-monophosphate kinase OS=Nitrosopumilus maritimus (strain SCM1) GN=thiL PE=3 SV=1	ATP-binding;Complete proteome;Kinase;Magnesium;Metal-binding;Nucleotide-binding;Reference proteome;Thiamine biosynthesis;Transferase;	2.7.4.16;	K00946;	Archaea	Unknown KINGDOM	Thaumarchaeota	Unknown CLASS	Nitrosopumilales	Nitrosopumilaceae	Nitrosopumilus	Nitrosopumilus maritimus	Nitrosopumilus maritimus SCM1	5	3	2	3	7	3	4	5	3	4	4	1	6	1	2	0	1	0	0	2	12	1	7	7	6	1	5	11	5	0	2	9	6	4	10	6
Meta-Protein 327	BLAST_HV335_HUMAN Immunoglobulin heavy variable 3-30-5 OS=Homo sapiens GN=IGHV3-30-5 PE=3 SV=1_P0DP03	3D-structure;Adaptive immunity;Cell membrane;Complete proteome;Direct protein sequencing;Disulfide bond;Immunity;Immunoglobulin V region;Immunoglobulin domain;Membrane;Polymorphism;Pyrrolidone carboxylic acid;Reference proteome;Secreted;Signal;	;	;	Unknown SUPERKINGDOM	Unknown KINGDOM	Unknown PHYLUM	Unknown CLASS	Unknown ORDER	Unknown FAMILY	Unknown GENUS	Unknown SPECIES	Unknown SUBSPECIES	4	0	0	0	0	0	5	0	6	0	0	0	0	0	3	4	0	0	0	0	8	0	13	11	15	0	0	2	6	2	8	2	14	2	0	12
Meta-Protein 246	BLAST_ALF_TREPA Fructose-bisphosphate aldolase OS=Treponema pallidum (strain Nichols) GN=fba PE=3 SV=1_O83668	Complete proteome;Glycolysis;Lyase;Metal-binding;Reference proteome;Zinc;	4.1.2.13;	K01624;	Unknown SUPERKINGDOM	Unknown KINGDOM	Unknown PHYLUM	Unknown CLASS	Unknown ORDER	Unknown FAMILY	Unknown GENUS	Unknown SPECIES	Unknown SUBSPECIES	0	8	25	0	0	9	11	2	26	6	0	29	0	11	0	2	1	0	4	8	0	0	2	4	2	27	1	0	2	7	0	0	3	21	0	0
Meta-Protein 584	BLAST_PRDB_ACESD D-proline reductase subunit gamma OS=Acetoanaerobium sticklandii (strain ATCC 12662 / DSM 519 / JCM 1433 / NCIMB 10654) GN=prdB PE=1 SV=3_Q9Z4Q7	Complete proteome;Cytoplasm;Direct protein sequencing;Oxidoreductase;Reference proteome;Selenocysteine;	1.21.4.1;	K10794;	Bacteria	Unknown KINGDOM	Firmicutes	Clostridia	Clostridiales	Peptostreptococcaceae	Unknown GENUS	[Clostridium] sticklandii	Clostridium sticklandii DSM 519	3	4	0	4	11	10	15	2	3	0	0	0	8	2	0	0	0	0	0	3	0	2	1	2	16	1	2	8	4	9	0	6	12	0	0	0
Meta-Protein 126	BLAST_GRDG_PEPAC Sarcosine reductase complex component B subunit alpha OS=Peptoclostridium acidaminophilum GN=grdG PE=3 SV=1_O86185	Complete proteome;Direct protein sequencing;Oxidoreductase;Pyruvate;Reference proteome;Schiff base;	1.21.4.2;1.21.4.3;	;K10671;	Unknown SUPERKINGDOM	Unknown KINGDOM	Unknown PHYLUM	Unknown CLASS	Unknown ORDER	Unknown FAMILY	Unknown GENUS	Unknown SPECIES	Unknown SUBSPECIES	1	0	0	5	0	6	27	0	28	2	0	16	2	0	0	0	1	1	0	2	0	0	0	1	0	9	0	1	1	9	0	6	4	13	1	0
Meta-Protein 874	BLAST_AMY_BACSU Alpha-amylase OS=Bacillus subtilis (strain 168) GN=amyE PE=1 SV=2_P00691	3D-structure;Calcium;Carbohydrate metabolism;Cellulose degradation;Complete proteome;Glycosidase;Hydrolase;Metal-binding;Polysaccharide degradation;Reference proteome;Secreted;Signal;	3.2.1.1;3.2.1.4;	;K01176;	Unknown SUPERKINGDOM	Unknown KINGDOM	Unknown PHYLUM	Unknown CLASS	Unknown ORDER	Unknown FAMILY	Unknown GENUS	Unknown SPECIES	Unknown SUBSPECIES	0	10	0	2	26	5	0	0	8	1	0	0	5	32	0	0	0	0	2	0	0	8	0	4	0	0	12	0	0	4	0	0	0	29	0	0
Meta-Protein 317	BLAST_BMPB_BORBP Basic membrane protein B OS=Borreliella bavariensis (strain ATCC BAA-2496 / DSM 23469 / PBi) GN=bmpB PE=3 SV=2_O31362	3D-structure;Cell membrane;Complete proteome;Direct protein sequencing;Lipoprotein;Membrane;Palmitate;Reference proteome;Signal;Transport;	;	;K02058;K07335;	Unknown SUPERKINGDOM	Unknown KINGDOM	Unknown PHYLUM	Unknown CLASS	Unknown ORDER	Unknown FAMILY	Unknown GENUS	Unknown SPECIES	Unknown SUBSPECIES	0	7	11	1	4	10	8	8	11	4	1	7	6	5	1	4	8	7	3	6	0	0	0	5	0	6	4	0	0	0	0	7	0	5	9	0
Meta-Protein 1300	BLAST_MUC13_HUMAN Mucin-13 OS=Homo sapiens GN=MUC13 PE=1 SV=3_Q9H3R2	Cell membrane;Complete proteome;Disulfide bond;EGF-like domain;Glycoprotein;Membrane;Polymorphism;Reference proteome;Repeat;Secreted;Signal;Transmembrane;Transmembrane helix;	;	K17298;	Eukaryota	Metazoa	Chordata	Mammalia	Primates	Hominidae	Homo	Homo sapiens	Unknown SUBSPECIES	25	4	0	5	0	5	0	0	10	0	0	0	1	0	2	6	1	0	1	0	18	0	8	17	18	0	2	4	17	0	11	3	2	0	9	3
Meta-Protein 332	FRIL_HUMAN Ferritin light chain OS=Homo sapiens GN=FTL PE=1 SV=2	3D-structure;Acetylation;Cataract;Complete proteome;Direct protein sequencing;Disease mutation;Iron;Iron storage;Metal-binding;Neurodegeneration;Reference proteome;	;	K13625;	Eukaryota	Metazoa	Chordata	Mammalia	Primates	Hominidae	Unknown GENUS	Unknown SPECIES	Unknown SUBSPECIES	0	0	0	6	0	4	0	10	6	8	0	5	0	0	0	3	1	1	0	5	33	1	2	0	0	0	8	12	8	0	2	0	8	2	0	0
Meta-Protein 828	BLAST_TPT_MAIZE Triose phosphate/phosphate translocator, chloroplastic OS=Zea mays GN=TPT PE=1 SV=1_P49133	Chloroplast;Complete proteome;Direct protein sequencing;Membrane;Plastid;Reference proteome;Transit peptide;Transmembrane;Transmembrane helix;Transport;	;	K15283;	Unknown SUPERKINGDOM	Unknown KINGDOM	Unknown PHYLUM	Unknown CLASS	Unknown ORDER	Unknown FAMILY	Unknown GENUS	Unknown SPECIES	Unknown SUBSPECIES	6	5	5	4	5	6	6	3	5	4	4	4	0	3	4	3	1	5	4	4	13	5	7	5	6	4	4	7	6	8	5	4	7	0	5	4
Meta-Protein 324	BLAST_DHE2_CLODI NAD-specific glutamate dehydrogenase OS=Clostridioides difficile GN=gluD PE=3 SV=1_P27346	NAD;Oxidoreductase;	1.4.1.2;	;	Bacteria	Unknown KINGDOM	Firmicutes	Clostridia	Clostridiales	Peptostreptococcaceae	Unknown GENUS	[Clostridium] difficile	Unknown SUBSPECIES	24	0	0	0	2	0	6	56	0	2	0	0	4	11	5	8	0	0	1	0	0	0	0	0	0	0	0	0	0	0	36	0	33	0	0	0
Meta-Protein 1278	Metagenome unknown	Complete proteome;Direct protein sequencing;Glycolysis;Lyase;Metal-binding;Phosphoprotein;Reference proteome;Zinc;	4.1.2.13;	K01624;	Unknown SUPERKINGDOM	Unknown KINGDOM	Unknown PHYLUM	Unknown CLASS	Unknown ORDER	Unknown FAMILY	Unknown GENUS	Unknown SPECIES	Unknown SUBSPECIES	0	0	4	0	0	2	10	0	2	8	0	5	0	0	0	0	0	0	0	2	19	0	0	0	4	0	14	14	0	0	0	0	0	0	0	0
Meta-Protein 476	BLAST_TPIS_BACCN Triosephosphate isomerase OS=Bacillus cytotoxicus (strain DSM 22905 / CIP 110041 / 391-98 / NVH 391-98) GN=tpiA PE=3 SV=1_A7GUR9	Complete proteome;Cytoplasm;Direct protein sequencing;Gluconeogenesis;Glycolysis;Isomerase;Pentose shunt;Phosphoprotein;Reference proteome;Stress response;	5.3.1.1;	;K01803;	Bacteria	Unknown KINGDOM	Firmicutes	Bacilli	Bacillales	Bacillaceae	Bacillus	Unknown SPECIES	Unknown SUBSPECIES	6	5	6	3	6	7	10	8	10	6	1	7	6	5	5	0	2	2	2	5	0	0	8	0	8	9	6	6	3	11	1	6	8	8	6	0
Meta-Protein 1061	BLAST_MTDH_MEDSA Probable mannitol dehydrogenase OS=Medicago sativa GN=CAD1 PE=1 SV=1_O82515	Acetylation;Alternative splicing;Cell projection;Cilium;Complete proteome;Cytoplasm;Flagellum;Lignin biosynthesis;Membrane;Metal-binding;Mitochondrion;NAD;NADP;Oxidoreductase;Phosphoprotein;Reference proteome;Zinc;	1.1.1.1;1.1.1.14;1.1.1.195;1.1.1.255;1.1.1.4;	;K00004;K00083;K13953;	Unknown SUPERKINGDOM	Unknown KINGDOM	Unknown PHYLUM	Unknown CLASS	Unknown ORDER	Unknown FAMILY	Unknown GENUS	Unknown SPECIES	Unknown SUBSPECIES	39	5	0	3	10	0	18	3	0	8	0	11	4	4	0	1	2	2	0	4	0	2	11	0	0	16	1	0	0	28	0	3	4	9	2	0
Meta-Protein 482	BLAST_PYCB_METJA Pyruvate carboxylase subunit B OS=Methanocaldococcus jannaschii (strain ATCC 43067 / DSM 2661 / JAL-1 / JCM 10045 / NBRC 100440) GN=pycB PE=1 SV=1_Q58628	3D-structure;ATP-binding;Acetylation;Biotin;Cobalt;Complete proteome;Cytoplasm;Decarboxylase;Direct protein sequencing;Gluconeogenesis;Ion transport;Ligase;Lyase;Magnesium;Metal-binding;Multifunctional enzyme;Nucleotide-binding;Pyruvate;Reference proteome;Sodium;Sodium transport;Transferase;Transport;Zinc;	2.1.3.1;4.1.1.3;6.4.1.1;	;K01571;K01958;K01960;	Unknown SUPERKINGDOM	Unknown KINGDOM	Unknown PHYLUM	Unknown CLASS	Unknown ORDER	Unknown FAMILY	Unknown GENUS	Unknown SPECIES	Unknown SUBSPECIES	3	2	1	0	0	3	3	5	24	7	1	3	1	1	1	1	0	1	2	5	0	2	4	1	7	14	2	0	1	13	0	3	2	16	5	0
Meta-Protein 28995	BLAST_SLT2_YEAST Mitogen-activated protein kinase SLT2/MPK1 OS=Saccharomyces cerevisiae (strain ATCC 204508 / S288c) GN=SLT2 PE=1 SV=2_Q00772	ATP-binding;Complete proteome;Kinase;Nucleotide-binding;Phosphoprotein;Reference proteome;Serine/threonine-protein kinase;Transferase;	2.7.11.24;	K04464;	Eukaryota	Fungi	Ascomycota	Saccharomycetes	Saccharomycetales	Saccharomycetaceae	Saccharomyces	Saccharomyces cerevisiae	Saccharomyces cerevisiae S288c	7	1	1	0	9	2	1	2	4	0	1	1	0	0	0	1	1	1	0	1	29	0	1	2	8	2	5	10	12	7	1	5	4	7	0	1
Meta-Protein 1097	BLAST_SUSD_BACTN Starch-binding protein SusD OS=Bacteroides thetaiotaomicron (strain ATCC 29148 / DSM 2079 / NCTC 10582 / E50 / VPI-5482) GN=susD PE=1 SV=1_Q8A1G2	3D-structure;Calcium;Carbohydrate metabolism;Cell outer membrane;Complete proteome;Lipoprotein;Membrane;Metal-binding;Palmitate;Reference proteome;Signal;	;	K21572;	Unknown SUPERKINGDOM	Unknown KINGDOM	Unknown PHYLUM	Unknown CLASS	Unknown ORDER	Unknown FAMILY	Unknown GENUS	Unknown SPECIES	Unknown SUBSPECIES	0	0	0	0	0	0	0	0	1	0	0	0	0	0	0	0	6	0	0	7	0	0	0	0	0	45	0	0	0	41	0	0	49	0	10	0
Meta-Protein 3868	BLAST_TKT_BACHD Transketolase OS=Bacillus halodurans (strain ATCC BAA-125 / DSM 18197 / FERM 7344 / JCM 9153 / C-125) GN=tkt PE=3 SV=1_Q9KAD7	Calcium;Complete proteome;Magnesium;Metal-binding;Reference proteome;Thiamine pyrophosphate;Transferase;	2.2.1.1;	K00615;	Unknown SUPERKINGDOM	Unknown KINGDOM	Unknown PHYLUM	Unknown CLASS	Unknown ORDER	Unknown FAMILY	Unknown GENUS	Unknown SPECIES	Unknown SUBSPECIES	0	0	0	0	0	24	24	0	0	0	0	0	0	0	0	0	0	19	0	0	0	69	0	20	0	0	0	0	0	0	0	0	0	0	0	0
Meta-Protein 2963	Metagenome unknown				Unknown SUPERKINGDOM	Unknown KINGDOM	Unknown PHYLUM	Unknown CLASS	Unknown ORDER	Unknown FAMILY	Unknown GENUS	Unknown SPECIES	Unknown SUBSPECIES	0	0	0	0	69	11	0	0	0	0	0	0	0	3	0	0	0	12	0	2	0	34	2	4	0	0	0	0	0	0	0	2	2	0	0	0
Meta-Protein 542	BLAST_RL10_GRAFK 50S ribosomal protein L10 OS=Gramella forsetii (strain KT0803) GN=rplJ PE=3 SV=1_A0M3Z1	Complete proteome;RNA-binding;Reference proteome;Ribonucleoprotein;Ribosomal protein;rRNA-binding;	;	K02864;	Unknown SUPERKINGDOM	Unknown KINGDOM	Unknown PHYLUM	Unknown CLASS	Unknown ORDER	Unknown FAMILY	Unknown GENUS	Unknown SPECIES	Unknown SUBSPECIES	3	0	3	0	0	13	10	4	1	0	0	3	0	2	0	0	0	10	0	0	0	50	12	3	23	4	0	0	0	4	0	0	4	22	0	8
Meta-Protein 1053	BLAST_FUCA_METMP L-fuculose phosphate aldolase OS=Methanococcus maripaludis (strain S2 / LL) GN=fucA PE=3 SV=1_Q6LY06	Carbohydrate metabolism;Complete proteome;Lyase;Metal-binding;Reference proteome;Zinc;	4.1.1.104;4.1.2.17;	K01628;K22130;	Unknown SUPERKINGDOM	Unknown KINGDOM	Unknown PHYLUM	Unknown CLASS	Unknown ORDER	Unknown FAMILY	Unknown GENUS	Unknown SPECIES	Unknown SUBSPECIES	27	7	2	1	8	16	16	8	8	17	0	11	0	12	1	4	6	6	0	1	0	3	0	0	6	18	0	3	2	5	0	4	3	5	0	0
Meta-Protein 349	SODC_PANTR Superoxide dismutase [Cu-Zn] OS=Pan troglodytes GN=SOD1 PE=2 SV=2	3D-structure;Acetylation;Amyotrophic lateral sclerosis;Antioxidant;Complete proteome;Copper;Cytoplasm;Direct protein sequencing;Disease mutation;Disulfide bond;Lipoprotein;Metal-binding;Mitochondrion;Neurodegeneration;Nucleus;Oxidoreductase;Palmitate;Phosphoprotein;Reference proteome;Ubl conjugation;Zinc;	1.15.1.1;	K04565;	Eukaryota	Metazoa	Chordata	Mammalia	Primates	Hominidae	Unknown GENUS	Unknown SPECIES	Unknown SUBSPECIES	7	0	13	6	4	0	0	0	0	0	0	0	5	0	0	0	0	0	1	0	9	22	0	8	0	8	3	8	17	0	9	6	13	2	0	0
Meta-Protein 71	MUC5A_HUMAN Mucin-5AC OS=Homo sapiens GN=MUC5AC PE=1 SV=4	3D-structure;Alternative splicing;Blood coagulation;Cell adhesion;Cell membrane;Complete proteome;Direct protein sequencing;Disulfide bond;Extracellular matrix;GPI-anchor;Glycoprotein;Hearing;Hemostasis;Leucine-rich repeat;Lipoprotein;Membrane;Phosphoprotein;Polymorphism;Reference proteome;Repeat;Secreted;Signal;Sulfation;Transmembrane;Transmembrane helix;	;	K06261;K18273;K21125;	Unknown SUPERKINGDOM	Unknown KINGDOM	Unknown PHYLUM	Unknown CLASS	Unknown ORDER	Unknown FAMILY	Unknown GENUS	Unknown SPECIES	Unknown SUBSPECIES	8	6	2	0	2	6	6	2	6	11	0	6	0	6	1	1	2	4	2	0	6	0	0	8	15	6	0	4	8	6	10	5	0	2	0	0
Meta-Protein 3474	Metagenome unknown				Unknown SUPERKINGDOM	Unknown KINGDOM	Unknown PHYLUM	Unknown CLASS	Unknown ORDER	Unknown FAMILY	Unknown GENUS	Unknown SPECIES	Unknown SUBSPECIES	0	0	0	0	0	0	0	0	0	0	0	200	0	0	0	1	0	0	0	0	0	0	0	13	2	0	0	0	0	45	0	0	0	0	0	0
Meta-Protein 365	BLAST_OLHYD_MACCJ Oleate hydratase OS=Macrococcus caseolyticus (strain JCSC5402) GN=MCCL_0076 PE=1 SV=1_B9E972	Complete proteome;Detoxification;FAD;Fatty acid metabolism;Flavoprotein;Lipid metabolism;Lyase;Reference proteome;	4.2.1.53;	K10254;	Unknown SUPERKINGDOM	Unknown KINGDOM	Unknown PHYLUM	Unknown CLASS	Unknown ORDER	Unknown FAMILY	Unknown GENUS	Unknown SPECIES	Unknown SUBSPECIES	0	5	1	0	2	2	3	1	0	5	0	4	0	0	0	0	0	0	1	6	5	0	5	0	1	5	1	2	1	0	2	0	0	1	10	1
Meta-Protein 1189	BLAST_FLA_BACHD Flagellin OS=Bacillus halodurans (strain ATCC BAA-125 / DSM 18197 / FERM 7344 / JCM 9153 / C-125) GN=hag PE=1 SV=1_Q05203	Bacterial flagellum;Cell wall;Complete proteome;Direct protein sequencing;Reference proteome;Secreted;	;	;K02406;	Unknown SUPERKINGDOM	Unknown KINGDOM	Unknown PHYLUM	Unknown CLASS	Unknown ORDER	Unknown FAMILY	Unknown GENUS	Unknown SPECIES	Unknown SUBSPECIES	0	19	1	0	14	0	9	4	14	16	0	0	3	0	0	0	5	0	1	2	22	0	0	2	18	4	0	55	0	8	0	0	5	25	0	2
Meta-Protein 8309	Metagenome unknown				Unknown SUPERKINGDOM	Unknown KINGDOM	Unknown PHYLUM	Unknown CLASS	Unknown ORDER	Unknown FAMILY	Unknown GENUS	Unknown SPECIES	Unknown SUBSPECIES	0	0	0	0	0	0	0	0	0	0	0	0	0	18	0	0	0	0	0	0	0	0	0	0	0	0	0	0	0	0	0	12	0	0	0	0
Meta-Protein 18530	THII_CALS4 Probable tRNA sulfurtransferase OS=Caldanaerobacter subterraneus subsp. tengcongensis (strain DSM 15242 / JCM 11007 / NBRC 100824 / MB4) GN=thiI PE=3 SV=1	ATP-binding;Complete proteome;Cytoplasm;Nucleotide-binding;Reference proteome;RNA-binding;Thiamine biosynthesis;Transferase;tRNA-binding;	2.8.1.4;	K03151;	Bacteria	Unknown KINGDOM	Firmicutes	Clostridia	Thermoanaerobacterales	Thermoanaerobacteraceae	Caldanaerobacter	Thermoanaerobacter tengcongensis MB4	Caldanaerobacter subterraneus subsp. tengcongensis	5	6	6	7	5	4	6	4	5	0	3	4	0	5	2	4	4	4	6	0	1	0	5	7	6	5	4	6	4	4	4	6	7	5	1	0
Meta-Protein 18531	Metagenome unknown				Unknown SUPERKINGDOM	Unknown KINGDOM	Unknown PHYLUM	Unknown CLASS	Unknown ORDER	Unknown FAMILY	Unknown GENUS	Unknown SPECIES	Unknown SUBSPECIES	5	6	6	7	5	4	6	4	5	0	3	4	0	5	2	4	4	4	6	0	1	0	5	7	6	5	4	6	4	4	4	6	7	5	1	0
Meta-Protein 469	BLAST_RPRY_BACFR Transcriptional regulatory protein RprY OS=Bacteroides fragilis (strain YCH46) GN=rprY PE=3 SV=2_Q9AE24	Complete proteome;Cytoplasm;DNA-binding;Phosphoprotein;Transcription;Transcription regulation;Two-component regulatory system;	;	;	Unknown SUPERKINGDOM	Unknown KINGDOM	Unknown PHYLUM	Unknown CLASS	Unknown ORDER	Unknown FAMILY	Unknown GENUS	Unknown SPECIES	Unknown SUBSPECIES	3	6	2	0	0	5	8	0	2	1	0	5	0	0	1	0	0	4	0	4	0	27	9	3	0	10	0	9	6	15	0	0	13	15	0	0
Meta-Protein 467	BLAST_ALKH_TREPA Putative KHG/KDPG aldolase OS=Treponema pallidum (strain Nichols) GN=eda PE=3 SV=1_O83578	3D-structure;Complete proteome;Cytoplasm;Direct protein sequencing;Lyase;Multifunctional enzyme;Reference proteome;Schiff base;	4.1.2.14;4.1.3.16;	K01625;	Unknown SUPERKINGDOM	Unknown KINGDOM	Unknown PHYLUM	Unknown CLASS	Unknown ORDER	Unknown FAMILY	Unknown GENUS	Unknown SPECIES	Unknown SUBSPECIES	2	12	9	0	0	22	14	17	31	11	0	15	14	2	0	0	10	4	4	0	0	5	0	1	0	12	0	0	0	0	0	7	0	23	2	0
Meta-Protein 897	Metagenome unknown				Unknown SUPERKINGDOM	Unknown KINGDOM	Unknown PHYLUM	Unknown CLASS	Unknown ORDER	Unknown FAMILY	Unknown GENUS	Unknown SPECIES	Unknown SUBSPECIES	15	17	1	0	17	0	0	0	0	0	0	3	6	0	11	12	2	0	0	1	0	0	29	0	0	0	5	0	23	0	0	10	18	13	11	0
Meta-Protein 22999	Metagenome unknown				Unknown SUPERKINGDOM	Unknown KINGDOM	Unknown PHYLUM	Unknown CLASS	Unknown ORDER	Unknown FAMILY	Unknown GENUS	Unknown SPECIES	Unknown SUBSPECIES	8	0	0	9	5	0	6	1	0	3	1	0	1	0	0	1	0	0	0	1	10	2	2	2	7	0	9	14	16	2	9	7	9	0	4	10
Meta-Protein 709	BLAST_PTA_SHIFL Phosphate acetyltransferase OS=Shigella flexneri GN=pta PE=3 SV=2_P0A9M9	Acyltransferase;Complete proteome;Cytoplasm;Direct protein sequencing;Reference proteome;Transferase;	2.3.1.8;	K13788;	Unknown SUPERKINGDOM	Unknown KINGDOM	Unknown PHYLUM	Unknown CLASS	Unknown ORDER	Unknown FAMILY	Unknown GENUS	Unknown SPECIES	Unknown SUBSPECIES	0	0	0	0	0	0	0	1	0	0	0	1	0	0	0	0	0	0	0	0	9	41	2	5	6	0	0	0	8	8	0	0	0	0	0	63
Meta-Protein 475	BLAST_YGEW_ECOLI Putative carbamoyltransferase YgeW OS=Escherichia coli (strain K12) GN=ygeW PE=1 SV=2_Q46803	3D-structure;Complete proteome;Reference proteome;Transferase;	2.1.3.-;	;	Unknown SUPERKINGDOM	Unknown KINGDOM	Unknown PHYLUM	Unknown CLASS	Unknown ORDER	Unknown FAMILY	Unknown GENUS	Unknown SPECIES	Unknown SUBSPECIES	10	0	0	0	2	0	6	0	2	4	0	17	0	0	0	0	0	0	0	6	10	0	4	0	3	12	0	0	6	24	0	0	12	21	6	0
Meta-Protein 6889	RL7_SALHS 50S ribosomal protein L7/L12 OS=Salmonella heidelberg (strain SL476) GN=rplL PE=3 SV=1	Acetylation;Complete proteome;Reference proteome;Ribonucleoprotein;Ribosomal protein;	;	K02935;	Unknown SUPERKINGDOM	Unknown KINGDOM	Unknown PHYLUM	Unknown CLASS	Unknown ORDER	Unknown FAMILY	Unknown GENUS	Unknown SPECIES	Unknown SUBSPECIES	0	0	0	0	0	0	0	0	0	0	0	0	0	0	0	0	0	0	1	0	0	52	0	0	0	0	0	0	0	0	0	0	0	0	0	4
Meta-Protein 3010	BLAST_PRO20_ORYSJ Prolamin PPROL 14P OS=Oryza sativa subsp. japonica GN=PROLM20 PE=2 SV=1_Q42465	Complete proteome;Pyrrolidone carboxylic acid;Reference proteome;Seed storage protein;Signal;Storage protein;Vacuole;	;	;	Eukaryota	Viridiplantae	Streptophyta	Liliopsida	Poales	Poaceae	Oryza	Oryza sativa	Oryza sativa Japonica Group	0	0	0	0	1	0	0	2	0	0	0	0	0	0	0	0	0	0	0	0	0	58	0	0	0	0	0	0	0	31	0	0	51	100	0	0
Meta-Protein 12697	BLAST_HBD_CLOAB 3-hydroxybutyryl-CoA dehydrogenase OS=Clostridium acetobutylicum (strain ATCC 824 / DSM 792 / JCM 1419 / LMG 5710 / VKM B-1787) GN=hbd PE=1 SV=2_P52041	Complete proteome;Fatty acid metabolism;Lipid metabolism;NADP;Oxidoreductase;Reference proteome;	1.1.1.157;	K00074;	Bacteria	Unknown KINGDOM	Firmicutes	Clostridia	Clostridiales	Clostridiaceae	Clostridium	Clostridium acetobutylicum	Clostridium acetobutylicum ATCC 824	1	3	3	7	3	5	4	7	4	5	1	8	3	0	0	1	0	0	0	2	0	3	0	6	0	20	3	0	0	0	0	14	4	5	14	0
Meta-Protein 2643	Metagenome unknown				Unknown SUPERKINGDOM	Unknown KINGDOM	Unknown PHYLUM	Unknown CLASS	Unknown ORDER	Unknown FAMILY	Unknown GENUS	Unknown SPECIES	Unknown SUBSPECIES	6	0	0	0	0	0	0	3	2	0	0	15	0	0	0	0	2	0	6	0	0	0	32	0	0	0	0	0	10	0	0	0	98	0	20	0
Meta-Protein 101	RS1_ECOLI 30S ribosomal protein S1 OS=Escherichia coli (strain K12) GN=rpsA PE=1 SV=1	3D-structure;Acetylation;Chaperone;Coiled coil;Complete proteome;Cytoplasm;Direct protein sequencing;Magnesium;Metal-binding;Nucleotidyltransferase;Phosphoprotein;RNA-binding;Reference proteome;Repeat;Repressor;Ribonucleoprotein;Ribosomal protein;Transferase;	;2.7.7.8;	;K00962;K02945;K06959;	Unknown SUPERKINGDOM	Unknown KINGDOM	Unknown PHYLUM	Unknown CLASS	Unknown ORDER	Unknown FAMILY	Unknown GENUS	Unknown SPECIES	Unknown SUBSPECIES	0	0	0	0	0	0	0	2	0	0	0	0	0	0	0	0	0	0	0	0	2	58	0	0	6	0	0	0	2	0	0	0	0	0	0	39
Meta-Protein 540	BLAST_NPM_HUMAN Nucleophosmin OS=Homo sapiens GN=NPM1 PE=1 SV=2_P06748	3D-structure;ADP-ribosylation;Acetylation;Alternative splicing;Chaperone;Chromosomal rearrangement;Complete proteome;Cytoplasm;Cytoskeleton;DNA-binding;Direct protein sequencing;Disulfide bond;Host-virus interaction;Isopeptide bond;Nucleus;Phosphoprotein;Proto-oncogene;RNA-binding;Reference proteome;Ubl conjugation;	;	K11276;	Unknown SUPERKINGDOM	Unknown KINGDOM	Unknown PHYLUM	Unknown CLASS	Unknown ORDER	Unknown FAMILY	Unknown GENUS	Unknown SPECIES	Unknown SUBSPECIES	0	0	0	0	0	0	0	0	0	0	0	1	0	0	0	0	0	0	0	2	3	4	7	3	4	3	7	4	16	10	0	0	10	0	3	0
Meta-Protein 450	BLAST_RL14_EUBE2 50S ribosomal protein L14 OS=Eubacterium eligens (strain ATCC 27750 / VPI C15-48) GN=rplN PE=3 SV=1_C4Z2U0	3D-structure;Chloroplast;Complete proteome;Direct protein sequencing;Plastid;RNA-binding;Reference proteome;Ribonucleoprotein;Ribosomal protein;rRNA-binding;	;	;K02874;	Unknown SUPERKINGDOM	Unknown KINGDOM	Unknown PHYLUM	Unknown CLASS	Unknown ORDER	Unknown FAMILY	Unknown GENUS	Unknown SPECIES	Unknown SUBSPECIES	34	7	0	4	5	6	13	8	14	1	0	8	2	16	0	17	2	1	0	0	0	1	3	0	2	7	0	0	2	7	2	2	2	1	0	13
Meta-Protein 1504	Metagenome unknown	3D-structure;Complete proteome;Direct protein sequencing;Periplasm;Reference proteome;Signal;Transport;	;	K02058;	Unknown SUPERKINGDOM	Unknown KINGDOM	Unknown PHYLUM	Unknown CLASS	Unknown ORDER	Unknown FAMILY	Unknown GENUS	Unknown SPECIES	Unknown SUBSPECIES	3	3	4	0	0	2	19	4	8	7	3	13	3	36	0	9	0	0	0	9	0	0	8	0	0	2	5	0	0	1	0	0	8	9	5	0
Meta-Protein 14961	Metagenome unknown				Unknown SUPERKINGDOM	Unknown KINGDOM	Unknown PHYLUM	Unknown CLASS	Unknown ORDER	Unknown FAMILY	Unknown GENUS	Unknown SPECIES	Unknown SUBSPECIES	12	4	2	4	13	3	5	1	2	3	3	1	3	4	3	1	2	3	2	1	24	2	1	6	9	8	7	9	9	4	0	10	9	4	5	3
Meta-Protein 531	BLAST_TFF3_HUMAN Trefoil factor 3 OS=Homo sapiens GN=TFF3 PE=1 SV=1_Q07654	3D-structure;Complete proteome;Cytoplasm;Direct protein sequencing;Disulfide bond;Extracellular matrix;Reference proteome;Secreted;Signal;	;	;	Eukaryota	Metazoa	Chordata	Mammalia	Primates	Hominidae	Homo	Homo sapiens	Unknown SUBSPECIES	0	0	0	1	0	4	0	1	3	3	0	3	1	0	0	0	0	0	0	2	7	5	6	12	10	2	7	11	12	5	7	5	6	2	4	8
Meta-Protein 19869	Metagenome unknown				Unknown SUPERKINGDOM	Unknown KINGDOM	Unknown PHYLUM	Unknown CLASS	Unknown ORDER	Unknown FAMILY	Unknown GENUS	Unknown SPECIES	Unknown SUBSPECIES	25	6	4	0	33	8	17	5	11	3	4	5	0	10	1	9	4	2	5	4	16	1	0	3	6	4	4	4	6	2	7	4	1	4	0	4
Meta-Protein 5885	Metagenome unknown				Unknown SUPERKINGDOM	Unknown KINGDOM	Unknown PHYLUM	Unknown CLASS	Unknown ORDER	Unknown FAMILY	Unknown GENUS	Unknown SPECIES	Unknown SUBSPECIES	0	0	0	0	0	0	0	0	0	0	0	0	0	0	0	0	0	0	0	24	0	0	35	0	0	0	6	0	0	0	0	0	0	0	0	0
Meta-Protein 13934	BLAST_DHPS_HAEIN Dihydropteroate synthase OS=Haemophilus influenzae (strain ATCC 51907 / DSM 11121 / KW20 / Rd) GN=folP-A PE=3 SV=1_P43776	Complete proteome;Folate biosynthesis;Magnesium;Metal-binding;Reference proteome;Transferase;	2.5.1.15;	K00796;	Bacteria	Unknown KINGDOM	Proteobacteria	Gammaproteobacteria	Pasteurellales	Pasteurellaceae	Haemophilus	Haemophilus influenzae	Haemophilus influenzae Rd KW20	2	4	0	3	7	1	1	2	5	2	0	3	5	5	1	2	2	0	1	2	11	1	8	4	10	2	3	5	4	2	8	1	13	1	2	6
Meta-Protein 459	BLAST_RS8_LACP7 30S ribosomal protein S8 OS=Lachnoclostridium phytofermentans (strain ATCC 700394 / DSM 18823 / ISDg) GN=rpsH PE=3 SV=1_A9KJI0	Complete proteome;RNA-binding;Reference proteome;Ribonucleoprotein;Ribosomal protein;rRNA-binding;	;	K02994;	Unknown SUPERKINGDOM	Unknown KINGDOM	Unknown PHYLUM	Unknown CLASS	Unknown ORDER	Unknown FAMILY	Unknown GENUS	Unknown SPECIES	Unknown SUBSPECIES	10	6	3	3	0	8	5	4	14	1	3	14	4	2	3	1	0	0	0	2	0	0	4	0	7	5	2	0	2	4	0	10	3	9	0	0
Meta-Protein 23167	Metagenome unknown				Unknown SUPERKINGDOM	Unknown KINGDOM	Unknown PHYLUM	Unknown CLASS	Unknown ORDER	Unknown FAMILY	Unknown GENUS	Unknown SPECIES	Unknown SUBSPECIES	2	0	0	0	0	0	0	0	0	0	0	0	0	0	0	0	0	0	0	0	35	0	0	0	0	0	0	30	45	0	0	0	0	0	0	0
Meta-Protein 1671	Metagenome unknown				Unknown SUPERKINGDOM	Unknown KINGDOM	Unknown PHYLUM	Unknown CLASS	Unknown ORDER	Unknown FAMILY	Unknown GENUS	Unknown SPECIES	Unknown SUBSPECIES	0	0	0	0	0	0	56	0	1	0	0	0	0	57	0	0	0	0	0	0	0	7	0	0	0	0	0	0	0	0	0	0	0	0	0	0
Meta-Protein 16804	BLAST_RS2_PORGI 30S ribosomal protein S2 OS=Porphyromonas gingivalis (strain ATCC BAA-308 / W83) GN=rpsB PE=3 SV=1_Q7MX41	Complete proteome;Reference proteome;Ribonucleoprotein;Ribosomal protein;	;	K02967;	Bacteria	Unknown KINGDOM	Bacteroidetes	Bacteroidia	Bacteroidales	Porphyromonadaceae	Porphyromonas	Porphyromonas gingivalis	Unknown SUBSPECIES	1	1	0	6	2	1	0	3	2	2	1	4	0	3	1	5	0	3	0	4	6	2	6	3	5	2	11	4	5	7	4	3	5	2	2	4
Meta-Protein 15354	BLAST_FAD25_MYCTU Putative fatty-acid--CoA ligase fadD25 OS=Mycobacterium tuberculosis (strain ATCC 25618 / H37Rv) GN=fadD25 PE=1 SV=1_P9WQ45	Cell membrane;Complete proteome;Fatty acid metabolism;Ligase;Lipid metabolism;Membrane;Reference proteome;Transmembrane;Transmembrane helix;	6.2.1.-;	;	Bacteria	Unknown KINGDOM	Actinobacteria	Actinobacteria	Actinomycetales	Mycobacteriaceae	Mycobacterium	Mycobacterium tuberculosis	Unknown SUBSPECIES	5	4	1	5	3	4	2	3	3	2	0	3	3	2	1	2	4	0	3	1	3	2	4	11	5	3	7	6	6	3	2	7	5	2	6	4
Meta-Protein 17531	BLAST_TETP_CLOPF Tetracycline resistance protein TetP OS=Clostridium perfringens GN=tetP PE=3 SV=1_Q46306	Antibiotic resistance;GTP-binding;Nucleotide-binding;Protein biosynthesis;	;	K18220;	Bacteria	Unknown KINGDOM	Firmicutes	Clostridia	Clostridiales	Clostridiaceae	Clostridium	Clostridium perfringens	Unknown SUBSPECIES	0	6	5	5	2	7	2	7	3	6	2	6	5	5	3	1	9	2	1	2	0	2	3	3	1	9	5	5	2	8	0	2	5	13	6	0
Meta-Protein 125	BLAST_NALDL_HUMAN N-acetylated-alpha-linked acidic dipeptidase-like protein OS=Homo sapiens GN=NAALADL1 PE=1 SV=2_Q9UQQ1	3D-structure;Alternative splicing;Carboxypeptidase;Cell membrane;Complete proteome;Dipeptidase;Direct protein sequencing;Glycoprotein;Hydrolase;Membrane;Metal-binding;Metalloprotease;Multifunctional enzyme;Polymorphism;Protease;Reference proteome;Signal-anchor;Transmembrane;Transmembrane helix;Zinc;	3.4.17.21;	K01301;	Eukaryota	Metazoa	Chordata	Mammalia	Unknown ORDER	Unknown FAMILY	Unknown GENUS	Unknown SPECIES	Unknown SUBSPECIES	4	0	1	0	6	4	3	2	5	1	0	4	3	4	0	2	0	0	0	0	9	2	14	9	4	0	1	4	0	15	24	34	0	0	0	2
Meta-Protein 231	BLAST_SDHB_BACSU Succinate dehydrogenase iron-sulfur subunit OS=Bacillus subtilis (strain 168) GN=sdhB PE=3 SV=3_P08066	2Fe-2S;3D-structure;3Fe-4S;4Fe-4S;Complete proteome;Cytoplasm;Direct protein sequencing;Electron transport;Iron;Iron-sulfur;Metal-binding;Oxidoreductase;Reference proteome;Repeat;Respiratory chain;Transport;Tricarboxylic acid cycle;	1.3.4.1;1.3.5.1;	K00240;K00245;K18210;	Unknown SUPERKINGDOM	Unknown KINGDOM	Unknown PHYLUM	Unknown CLASS	Unknown ORDER	Unknown FAMILY	Unknown GENUS	Unknown SPECIES	Unknown SUBSPECIES	0	0	0	0	0	10	6	0	0	0	0	1	0	5	0	4	1	7	1	0	0	29	2	11	2	3	0	0	8	1	0	0	5	10	0	0
Meta-Protein 1224	ELNE_HUMAN Neutrophil elastase OS=Homo sapiens GN=ELANE PE=1 SV=1	3D-structure;Complete proteome;Direct protein sequencing;Disease mutation;Disulfide bond;Glycoprotein;Hydrolase;Polymorphism;Protease;Reference proteome;Serine protease;Signal;Zymogen;	3.4.21.37;	K01327;	Eukaryota	Metazoa	Chordata	Mammalia	Primates	Hominidae	Homo	Homo sapiens	Unknown SUBSPECIES	0	2	0	0	0	0	0	0	0	0	0	0	0	0	0	0	0	0	0	1	11	0	1	1	6	0	1	3	19	2	30	0	113	0	2	1
Meta-Protein 2266	SPI2_SOLTU Serine protease inhibitor 2 OS=Solanum tuberosum PE=1 SV=1	3D-structure;Allergen;Aspartic protease inhibitor;Complete proteome;Direct protein sequencing;Disulfide bond;Glycoprotein;Protease inhibitor;Reference proteome;Serine protease inhibitor;Signal;Stress response;Vacuole;	;	;	Unknown SUPERKINGDOM	Unknown KINGDOM	Unknown PHYLUM	Unknown CLASS	Unknown ORDER	Unknown FAMILY	Unknown GENUS	Unknown SPECIES	Unknown SUBSPECIES	0	3	6	4	3	1	7	0	6	0	0	3	3	1	0	0	1	1	0	5	2	3	0	0	0	0	1	0	0	3	0	0	0	0	8	0
Meta-Protein 3854	Metagenome unknown	Cell wall;S-layer;Secreted;Signal;	;	;	Unknown SUPERKINGDOM	Unknown KINGDOM	Unknown PHYLUM	Unknown CLASS	Unknown ORDER	Unknown FAMILY	Unknown GENUS	Unknown SPECIES	Unknown SUBSPECIES	0	0	0	0	2	0	0	0	0	0	0	0	0	0	0	0	0	0	0	0	0	0	0	0	0	0	0	0	0	0	0	0	0	0	0	0
Meta-Protein 805	ALF_SHIFL Fructose-bisphosphate aldolase class 2 OS=Shigella flexneri GN=fbaA PE=3 SV=2	3D-structure;Acetylation;Complete proteome;Direct protein sequencing;Glycolysis;Lyase;Metal-binding;Reference proteome;Zinc;	4.1.2.13;	K01624;	Unknown SUPERKINGDOM	Unknown KINGDOM	Unknown PHYLUM	Unknown CLASS	Unknown ORDER	Unknown FAMILY	Unknown GENUS	Unknown SPECIES	Unknown SUBSPECIES	0	0	0	0	0	0	0	0	1	0	0	0	0	0	0	0	0	0	0	0	0	72	0	0	0	0	0	0	0	0	0	0	0	0	0	22
Meta-Protein 1286	Metagenome unknown	3D-structure;Adaptive immunity;Bence-Jones protein;Cell membrane;Complete proteome;Direct protein sequencing;Disulfide bond;Immunity;Immunoglobulin V region;Immunoglobulin domain;Membrane;Polymorphism;Reference proteome;Secreted;Signal;	;	;	Unknown SUPERKINGDOM	Unknown KINGDOM	Unknown PHYLUM	Unknown CLASS	Unknown ORDER	Unknown FAMILY	Unknown GENUS	Unknown SPECIES	Unknown SUBSPECIES	14	0	0	1	0	0	4	0	5	0	0	0	0	0	2	0	0	0	0	0	11	0	11	2	61	0	0	7	26	8	8	0	15	0	0	8
Meta-Protein 34877	Metagenome unknown				Unknown SUPERKINGDOM	Unknown KINGDOM	Unknown PHYLUM	Unknown CLASS	Unknown ORDER	Unknown FAMILY	Unknown GENUS	Unknown SPECIES	Unknown SUBSPECIES	0	0	0	0	0	0	0	0	0	0	0	0	0	0	0	0	0	0	0	1	6	1	9	26	8	1	4	12	8	18	0	1	8	0	2	2
Meta-Protein 352	BLAST_RS15_LACP7 30S ribosomal protein S15 OS=Lachnoclostridium phytofermentans (strain ATCC 700394 / DSM 18823 / ISDg) GN=rpsO PE=3 SV=1_A9KNL0	Complete proteome;RNA-binding;Reference proteome;Ribonucleoprotein;Ribosomal protein;rRNA-binding;	;	K02956;	Bacteria	Unknown KINGDOM	Firmicutes	Clostridia	Clostridiales	Unknown FAMILY	Unknown GENUS	Unknown SPECIES	Unknown SUBSPECIES	10	8	0	7	6	6	8	6	8	6	3	7	0	8	7	7	8	6	6	2	0	0	8	0	6	6	0	0	0	3	0	8	4	6	8	0
Meta-Protein 66	BLAST_CAD17_HUMAN Cadherin-17 OS=Homo sapiens GN=CDH17 PE=2 SV=3_Q12864	Calcium;Cell adhesion;Cell membrane;Complete proteome;Glycoprotein;Membrane;Metal-binding;Polymorphism;Reference proteome;Repeat;Signal;Transmembrane;Transmembrane helix;Transport;	;	K06811;	Eukaryota	Metazoa	Chordata	Mammalia	Primates	Hominidae	Homo	Homo sapiens	Unknown SUBSPECIES	0	0	0	0	0	6	7	3	0	0	0	0	0	0	0	0	0	0	0	0	22	17	0	15	25	2	2	13	8	0	2	8	0	0	0	0
Meta-Protein 2348	Metagenome unknown	3D-structure;Complete proteome;Direct protein sequencing;Disulfide bond;Polymorphism;Reference proteome;Seed storage protein;Signal;Storage protein;	;	;	Unknown SUPERKINGDOM	Unknown KINGDOM	Unknown PHYLUM	Unknown CLASS	Unknown ORDER	Unknown FAMILY	Unknown GENUS	Unknown SPECIES	Unknown SUBSPECIES	0	0	0	0	0	0	0	0	0	0	0	0	0	0	0	0	0	0	0	0	0	0	0	43	0	7	4	0	0	0	0	0	0	0	0	0
Meta-Protein 258	BLAST_ACKA_THETC Acetate kinase OS=Thermoanaerobacterium thermosaccharolyticum (strain ATCC 7956 / DSM 571 / NCIB 9385 / NCA 3814) GN=ackA PE=3 SV=2_Q59331	3D-structure;ATP-binding;Complete proteome;Cytoplasm;Direct protein sequencing;Kinase;Magnesium;Metal-binding;Nucleotide-binding;Reference proteome;Transferase;	2.7.2.1;	K00925;	Unknown SUPERKINGDOM	Unknown KINGDOM	Unknown PHYLUM	Unknown CLASS	Unknown ORDER	Unknown FAMILY	Unknown GENUS	Unknown SPECIES	Unknown SUBSPECIES	0	3	6	0	0	21	14	19	35	8	0	2	4	4	0	0	16	0	4	2	0	3	0	6	0	15	0	0	0	0	0	6	0	13	10	0
Meta-Protein 660	Metagenome unknown				Unknown SUPERKINGDOM	Unknown KINGDOM	Unknown PHYLUM	Unknown CLASS	Unknown ORDER	Unknown FAMILY	Unknown GENUS	Unknown SPECIES	Unknown SUBSPECIES	7	0	0	0	0	0	0	6	0	0	0	22	0	0	0	0	0	0	2	0	0	0	0	3	0	0	0	0	0	19	0	3	0	4	6	0
Meta-Protein 1974	Metagenome unknown				Unknown SUPERKINGDOM	Unknown KINGDOM	Unknown PHYLUM	Unknown CLASS	Unknown ORDER	Unknown FAMILY	Unknown GENUS	Unknown SPECIES	Unknown SUBSPECIES	0	1	0	0	0	0	0	0	0	0	0	47	0	0	0	0	0	0	0	0	0	0	0	0	0	11	0	0	0	57	0	0	0	79	0	0
Meta-Protein 364	BLAST_SUDHA_PYRFU Sulfide dehydrogenase subunit alpha OS=Pyrococcus furiosus (strain ATCC 43587 / DSM 3638 / JCM 8422 / Vc1) GN=sudA PE=1 SV=1_Q8U195	3D-structure;3Fe-4S;4Fe-4S;Amino-acid biosynthesis;Complete proteome;Cytoplasm;Direct protein sequencing;FAD;Flavoprotein;Glutamate biosynthesis;Iron;Iron-sulfur;Metal-binding;NADP;Oxidoreductase;Reference proteome;	1.18.1.2;1.4.1.13;1.8.1.19;	K00266;K20202;	Unknown SUPERKINGDOM	Unknown KINGDOM	Unknown PHYLUM	Unknown CLASS	Unknown ORDER	Unknown FAMILY	Unknown GENUS	Unknown SPECIES	Unknown SUBSPECIES	5	12	2	2	3	2	4	8	4	2	0	7	1	2	1	1	1	1	1	0	0	0	5	0	0	15	0	0	0	7	2	2	8	31	0	0
Meta-Protein 13273	BLAST_METQ_BACSU Methionine-binding lipoprotein MetQ OS=Bacillus subtilis (strain 168) GN=metQ PE=1 SV=1_O32167	3D-structure;Amino-acid transport;Cell membrane;Complete proteome;Lipoprotein;Membrane;Palmitate;Reference proteome;Signal;Transport;	;	K02073;	Bacteria	Unknown KINGDOM	Firmicutes	Bacilli	Bacillales	Bacillaceae	Bacillus	Bacillus subtilis subsp. subtilis str. 168	Bacillus subtilis subsp. subtilis	5	4	3	3	5	6	5	2	5	2	4	4	0	2	1	4	0	4	3	4	9	5	6	5	4	4	3	6	6	8	4	2	6	0	5	4
Meta-Protein 672	BLAST_KORA_MYCTU 2-oxoglutarate oxidoreductase subunit KorA OS=Mycobacterium tuberculosis (strain ATCC 25618 / H37Rv) GN=korA PE=1 SV=3_O53182	Complete proteome;Oxidoreductase;Reference proteome;Tricarboxylic acid cycle;	1.2.7.3;	K00174;	Unknown SUPERKINGDOM	Unknown KINGDOM	Unknown PHYLUM	Unknown CLASS	Unknown ORDER	Unknown FAMILY	Unknown GENUS	Unknown SPECIES	Unknown SUBSPECIES	0	3	4	0	0	0	0	3	1	1	0	4	0	0	0	0	1	0	0	3	0	0	10	0	26	6	4	0	2	24	0	4	14	20	0	6
Meta-Protein 372	BLAST_PFKA2_THET8 ATP-dependent 6-phosphofructokinase 2 (Fragment) OS=Thermus thermophilus (strain HB8 / ATCC 27634 / DSM 579) GN=pfkA2 PE=1 SV=3_P21778	3D-structure;ATP-binding;Allosteric enzyme;Complete proteome;Cytoplasm;Direct protein sequencing;Glycolysis;Kinase;Magnesium;Metal-binding;Nucleotide-binding;Reference proteome;Transferase;	2.7.1.11;	;K00850;	Unknown SUPERKINGDOM	Unknown KINGDOM	Unknown PHYLUM	Unknown CLASS	Unknown ORDER	Unknown FAMILY	Unknown GENUS	Unknown SPECIES	Unknown SUBSPECIES	6	7	0	0	1	9	13	4	16	10	0	14	3	2	6	3	3	3	1	2	0	20	7	2	3	12	0	0	0	3	0	1	0	13	2	15
Meta-Protein 23956	Metagenome unknown				Unknown SUPERKINGDOM	Unknown KINGDOM	Unknown PHYLUM	Unknown CLASS	Unknown ORDER	Unknown FAMILY	Unknown GENUS	Unknown SPECIES	Unknown SUBSPECIES	10	0	0	9	0	2	9	0	7	0	2	0	0	3	1	1	0	0	0	0	10	0	10	8	14	0	6	9	9	9	11	4	8	0	3	5
Meta-Protein 1188	BLAST_ACSD_MOOTH Corrinoid/iron-sulfur protein small subunit OS=Moorella thermoacetica GN=acsD PE=1 SV=2_Q07341	3D-structure;Carbon dioxide fixation;Cobalamin;Cobalt;Direct protein sequencing;	;	;	Unknown SUPERKINGDOM	Unknown KINGDOM	Unknown PHYLUM	Unknown CLASS	Unknown ORDER	Unknown FAMILY	Unknown GENUS	Unknown SPECIES	Unknown SUBSPECIES	6	4	0	4	5	1	7	0	4	1	0	13	5	0	2	4	0	0	0	0	0	0	6	0	4	6	0	0	0	5	0	0	9	47	3	0
Meta-Protein 350	BLAST_RL6_BACV8 50S ribosomal protein L6 OS=Bacteroides vulgatus (strain ATCC 8482 / DSM 1447 / JCM 5826 / NBRC 14291 / NCTC 11154) GN=rplF PE=3 SV=1_A6KYI0	3D-structure;Complete proteome;Direct protein sequencing;RNA-binding;Reference proteome;Ribonucleoprotein;Ribosomal protein;rRNA-binding;	;	;K02933;	Unknown SUPERKINGDOM	Unknown KINGDOM	Unknown PHYLUM	Unknown CLASS	Unknown ORDER	Unknown FAMILY	Unknown GENUS	Unknown SPECIES	Unknown SUBSPECIES	0	0	0	1	2	7	16	0	0	0	0	4	0	0	0	0	0	4	2	0	0	25	5	8	8	2	0	0	0	1	0	2	10	10	3	4
Meta-Protein 251	BLAST_RL10_THEP3 50S ribosomal protein L10 OS=Thermoanaerobacter pseudethanolicus (strain ATCC 33223 / 39E) GN=rplJ PE=3 SV=1_B0KCJ0	Complete proteome;RNA-binding;Reference proteome;Ribonucleoprotein;Ribosomal protein;rRNA-binding;	;	K02864;	Unknown SUPERKINGDOM	Unknown KINGDOM	Unknown PHYLUM	Unknown CLASS	Unknown ORDER	Unknown FAMILY	Unknown GENUS	Unknown SPECIES	Unknown SUBSPECIES	0	6	4	4	0	0	7	5	17	2	1	11	5	4	2	3	1	2	1	4	0	0	6	0	3	2	0	0	0	8	0	5	2	5	3	0
Meta-Protein 1627	Metagenome unknown	3D-structure;ATP-binding;Complete proteome;Cytoplasm;Glutamine amidotransferase;Hydrolase;Ligase;Magnesium;Metal-binding;Nucleotide-binding;Purine biosynthesis;Reference proteome;	3.5.1.2;6.3.5.3;	;K01952;	Unknown SUPERKINGDOM	Unknown KINGDOM	Unknown PHYLUM	Unknown CLASS	Unknown ORDER	Unknown FAMILY	Unknown GENUS	Unknown SPECIES	Unknown SUBSPECIES	24	5	0	5	4	5	5	4	5	10	0	12	1	6	3	6	12	5	6	5	2	5	1	5	1	18	5	0	1	2	0	4	0	2	1	6
Meta-Protein 1225	BLAST_FLA_BACHD Flagellin OS=Bacillus halodurans (strain ATCC BAA-125 / DSM 18197 / FERM 7344 / JCM 9153 / C-125) GN=hag PE=1 SV=1_Q05203	Bacterial flagellum;Cell wall;Complete proteome;Direct protein sequencing;Periplasm;Reference proteome;Secreted;	;	;K02406;	Unknown SUPERKINGDOM	Unknown KINGDOM	Unknown PHYLUM	Unknown CLASS	Unknown ORDER	Unknown FAMILY	Unknown GENUS	Unknown SPECIES	Unknown SUBSPECIES	2	6	6	0	8	12	0	13	8	52	5	19	7	0	0	0	0	0	0	10	0	0	0	0	0	11	0	0	0	1	0	0	0	61	8	0
Meta-Protein 254	BLAST_GPMI_BACV8 2,3-bisphosphoglycerate-independent phosphoglycerate mutase OS=Bacteroides vulgatus (strain ATCC 8482 / DSM 1447 / JCM 5826 / NBRC 14291 / NCTC 11154) GN=gpmI PE=3 SV=1_A6L050	Complete proteome;Direct protein sequencing;Glycolysis;Isomerase;Manganese;Metal-binding;Phosphoprotein;Reference proteome;Sporulation;	5.4.2.12;	K15633;	Unknown SUPERKINGDOM	Unknown KINGDOM	Unknown PHYLUM	Unknown CLASS	Unknown ORDER	Unknown FAMILY	Unknown GENUS	Unknown SPECIES	Unknown SUBSPECIES	0	0	5	0	0	9	5	0	2	0	0	0	0	0	1	0	1	4	0	0	0	28	4	2	14	1	1	2	0	2	1	4	6	25	6	3
Meta-Protein 2032	Metagenome unknown	Complete proteome;Direct protein sequencing;Lyase;Reference proteome;Thiamine pyrophosphate;	4.1.2.-;4.1.2.9;	;K01621;	Unknown SUPERKINGDOM	Unknown KINGDOM	Unknown PHYLUM	Unknown CLASS	Unknown ORDER	Unknown FAMILY	Unknown GENUS	Unknown SPECIES	Unknown SUBSPECIES	0	0	0	0	0	0	0	0	0	0	0	0	0	0	0	0	0	0	0	0	0	0	0	0	0	1	0	181	0	0	0	0	0	0	0	0
Meta-Protein 941	FTN_BACFR Bacterial non-heme ferritin OS=Bacteroides fragilis (strain YCH46) GN=ftnA PE=1 SV=1	Complete proteome;Direct protein sequencing;Iron;Iron storage;Metal-binding;Oxidoreductase;	1.16.3.2;	K02217;	Unknown SUPERKINGDOM	Unknown KINGDOM	Unknown PHYLUM	Unknown CLASS	Unknown ORDER	Unknown FAMILY	Unknown GENUS	Unknown SPECIES	Unknown SUBSPECIES	16	0	0	1	11	0	6	1	2	0	2	10	1	0	0	3	0	0	5	4	0	0	4	0	6	8	0	4	0	10	0	2	9	9	0	0
Meta-Protein 17204	Metagenome unknown				Unknown SUPERKINGDOM	Unknown KINGDOM	Unknown PHYLUM	Unknown CLASS	Unknown ORDER	Unknown FAMILY	Unknown GENUS	Unknown SPECIES	Unknown SUBSPECIES	3	2	1	1	2	0	1	0	0	0	0	1	0	2	0	0	1	0	0	2	20	0	7	2	7	1	7	9	12	8	2	3	6	0	4	7
Meta-Protein 21376	Metagenome unknown				Unknown SUPERKINGDOM	Unknown KINGDOM	Unknown PHYLUM	Unknown CLASS	Unknown ORDER	Unknown FAMILY	Unknown GENUS	Unknown SPECIES	Unknown SUBSPECIES	5	6	3	0	4	5	5	5	3	5	3	4	0	3	0	0	2	0	2	1	25	0	1	1	9	5	4	5	37	1	6	1	5	3	0	6
Meta-Protein 5002	BLAST_GUNB_CLOC7 Endoglucanase B OS=Clostridium cellulovorans (strain ATCC 35296 / DSM 3052 / OCM 3 / 743B) GN=engB PE=3 SV=1_P28621	Carbohydrate metabolism;Cellulose degradation;Complete proteome;Glycosidase;Hydrolase;Polysaccharide degradation;Reference proteome;Signal;	3.2.1.4;3.2.1.8;	K01179;	Unknown SUPERKINGDOM	Unknown KINGDOM	Unknown PHYLUM	Unknown CLASS	Unknown ORDER	Unknown FAMILY	Unknown GENUS	Unknown SPECIES	Unknown SUBSPECIES	0	18	0	0	0	0	0	3	11	6	0	0	0	0	0	0	6	0	0	0	0	0	0	0	0	0	0	0	0	0	0	0	0	97	0	0
Meta-Protein 94	BLAST_PUR9_CLOAB Bifunctional purine biosynthesis protein PurH OS=Clostridium acetobutylicum (strain ATCC 824 / DSM 792 / JCM 1419 / LMG 5710 / VKM B-1787) GN=purH PE=3 SV=1_Q97J91	Complete proteome;Hydrolase;Multifunctional enzyme;Purine biosynthesis;Reference proteome;Transferase;	2.1.2.3;3.5.4.10;	K00602;	Unknown SUPERKINGDOM	Unknown KINGDOM	Unknown PHYLUM	Unknown CLASS	Unknown ORDER	Unknown FAMILY	Unknown GENUS	Unknown SPECIES	Unknown SUBSPECIES	3	0	0	2	28	13	57	2	2	7	2	5	1	8	1	0	0	14	1	0	0	32	0	1	0	1	0	0	0	4	0	0	0	5	1	1
Meta-Protein 2414	BLAST_RL17_EUBE2 50S ribosomal protein L17 OS=Eubacterium eligens (strain ATCC 27750 / VPI C15-48) GN=rplQ PE=3 SV=1_C4Z2V8	Complete proteome;Reference proteome;Ribonucleoprotein;Ribosomal protein;	;	K02879;	Unknown SUPERKINGDOM	Unknown KINGDOM	Unknown PHYLUM	Unknown CLASS	Unknown ORDER	Unknown FAMILY	Unknown GENUS	Unknown SPECIES	Unknown SUBSPECIES	27	7	0	3	3	3	0	5	3	2	0	4	3	6	6	2	0	0	0	4	0	0	12	0	13	5	1	10	8	6	3	2	6	4	4	5
Meta-Protein 2156	CATG_HUMAN Cathepsin G OS=Homo sapiens GN=CTSG PE=1 SV=2	3D-structure;Antibiotic;Antimicrobial;Complete proteome;Direct protein sequencing;Disulfide bond;Glycoprotein;Hydrolase;Polymorphism;Protease;Reference proteome;Serine protease;Signal;Zymogen;	3.4.21.20;	K01319;	Eukaryota	Metazoa	Chordata	Mammalia	Primates	Hominidae	Homo	Homo sapiens	Unknown SUBSPECIES	0	5	0	0	4	0	0	0	0	4	0	0	0	0	0	0	0	0	0	0	0	0	0	0	2	0	0	0	36	0	65	0	87	0	0	0
Meta-Protein 1339	CAP7_HUMAN Azurocidin OS=Homo sapiens GN=AZU1 PE=1 SV=3	3D-structure;Antibiotic;Antimicrobial;Chemotaxis;Complete proteome;Direct protein sequencing;Disulfide bond;Glycoprotein;Heparin-binding;Membrane;Reference proteome;Serine protease homolog;Signal;Zymogen;	;	;	Unknown SUPERKINGDOM	Unknown KINGDOM	Unknown PHYLUM	Unknown CLASS	Unknown ORDER	Unknown FAMILY	Unknown GENUS	Unknown SPECIES	Unknown SUBSPECIES	0	0	0	0	0	0	0	0	0	0	0	0	0	0	0	0	0	0	0	0	17	0	0	0	0	0	0	0	17	0	19	0	99	0	0	1
Meta-Protein 164	Metagenome unknown	3D-structure;Complete proteome;Cytoplasm;Direct protein sequencing;Phosphoprotein;Phosphotransferase system;Reference proteome;Sugar transport;Transcription;Transcription regulation;Transport;	;	;K11184;K11189;	Unknown SUPERKINGDOM	Unknown KINGDOM	Unknown PHYLUM	Unknown CLASS	Unknown ORDER	Unknown FAMILY	Unknown GENUS	Unknown SPECIES	Unknown SUBSPECIES	0	3	2	3	0	5	2	1	6	4	0	3	1	0	2	2	0	1	1	2	0	6	5	2	4	13	3	0	0	18	0	4	4	18	2	0
Meta-Protein 1149	BLAST_AVEN_AVESA Avenin OS=Avena sativa PE=1 SV=1_P27919	Complete proteome;Direct protein sequencing;Disulfide bond;Reference proteome;Seed storage protein;Signal;Storage protein;	;	;	Unknown SUPERKINGDOM	Unknown KINGDOM	Unknown PHYLUM	Unknown CLASS	Unknown ORDER	Unknown FAMILY	Unknown GENUS	Unknown SPECIES	Unknown SUBSPECIES	0	2	4	0	0	11	2	4	7	24	0	3	14	2	9	0	3	1	0	0	0	0	0	0	0	14	0	0	0	0	3	0	2	1	0	0
Meta-Protein 16815	Metagenome unknown				Unknown SUPERKINGDOM	Unknown KINGDOM	Unknown PHYLUM	Unknown CLASS	Unknown ORDER	Unknown FAMILY	Unknown GENUS	Unknown SPECIES	Unknown SUBSPECIES	3	2	2	2	4	1	1	0	0	0	0	1	2	1	3	0	1	0	3	2	6	1	3	4	6	1	7	5	5	8	3	0	9	1	8	11
Meta-Protein 1027	BLAST_PUR4_IDILO Phosphoribosylformylglycinamidine synthase OS=Idiomarina loihiensis (strain ATCC BAA-735 / DSM 15497 / L2-TR) GN=purL PE=3 SV=1_Q5QWY0	ATP-binding;Chloroplast;Complete proteome;Cytoplasm;Glutamine amidotransferase;Hydrolase;Ligase;Magnesium;Metal-binding;Mitochondrion;Nucleotide-binding;Phosphoprotein;Plastid;Polymorphism;Purine biosynthesis;Reference proteome;Transit peptide;	3.5.1.2;6.3.5.3;	;K01952;	Unknown SUPERKINGDOM	Unknown KINGDOM	Unknown PHYLUM	Unknown CLASS	Unknown ORDER	Unknown FAMILY	Unknown GENUS	Unknown SPECIES	Unknown SUBSPECIES	6	7	5	0	5	9	29	2	5	7	2	11	1	8	0	0	1	1	0	0	0	28	1	3	12	0	0	0	1	1	9	0	0	9	0	1
Meta-Protein 1248	Metagenome unknown	3D-structure;Acute phase;Alternative splicing;Bait region;Complete proteome;Direct protein sequencing;Disulfide bond;Glycoprotein;Isopeptide bond;Polymorphism;Pregnancy;Protease inhibitor;Reference proteome;Secreted;Serine protease inhibitor;Signal;Thioester bond;	;	;K03910;	Unknown SUPERKINGDOM	Unknown KINGDOM	Unknown PHYLUM	Unknown CLASS	Unknown ORDER	Unknown FAMILY	Unknown GENUS	Unknown SPECIES	Unknown SUBSPECIES	0	0	0	0	0	0	0	0	0	0	0	15	0	0	0	0	0	0	0	16	2	0	4	13	0	0	0	0	0	0	55	0	13	0	10	0
Meta-Protein 1178	BLAST_G1091_AKKM8 Glycosyl hydrolase family 109 protein 1 OS=Akkermansia muciniphila (strain ATCC BAA-835 / Muc) GN=Amuc_0017 PE=3 SV=1_B2UL75	Complete proteome;Glycosidase;Hydrolase;NAD;Oxidoreductase;Reference proteome;Signal;	1.1.1.18;1.1.1.369;3.2.1.-;	;	Unknown SUPERKINGDOM	Unknown KINGDOM	Unknown PHYLUM	Unknown CLASS	Unknown ORDER	Unknown FAMILY	Unknown GENUS	Unknown SPECIES	Unknown SUBSPECIES	0	0	0	0	0	0	0	3	0	0	0	12	0	0	0	0	0	0	0	0	0	0	11	0	57	4	0	0	0	18	0	8	0	5	0	0
Meta-Protein 12644	BLAST_EFTU_GEOSW Elongation factor Tu OS=Geobacillus sp. (strain WCH70) GN=tuf PE=3 SV=1_C5D3R5	Complete proteome;Cytoplasm;Elongation factor;GTP-binding;Nucleotide-binding;Protein biosynthesis;Reference proteome;	;	;K02358;	Bacteria	Unknown KINGDOM	Firmicutes	Bacilli	Bacillales	Bacillaceae	Geobacillus	Unknown SPECIES	Unknown SUBSPECIES	6	12	8	0	3	3	4	5	4	4	1	7	5	1	3	3	7	3	5	4	0	0	4	0	9	11	4	4	8	3	1	0	8	14	0	0
Meta-Protein 800	BLAST_MSME_STRMU Multiple sugar-binding protein OS=Streptococcus mutans serotype c (strain ATCC 700610 / UA159) GN=msmE PE=2 SV=2_Q00749	Acetylation;Cell membrane;Complete proteome;Lipoprotein;Membrane;Palmitate;Reference proteome;Signal;Sugar transport;Transport;	;	K02027;K10117;	Unknown SUPERKINGDOM	Unknown KINGDOM	Unknown PHYLUM	Unknown CLASS	Unknown ORDER	Unknown FAMILY	Unknown GENUS	Unknown SPECIES	Unknown SUBSPECIES	0	0	0	0	0	0	74	10	10	0	0	34	0	0	0	0	12	0	0	0	0	4	0	0	0	0	2	0	0	0	0	4	0	0	0	0
Meta-Protein 244	BLAST_GALE_DICDI UDP-glucose 4-epimerase OS=Dictyostelium discoideum GN=galE PE=1 SV=1_Q553X7	Carbohydrate metabolism;Cell wall biogenesis/degradation;Complete proteome;Cytoplasm;Galactose metabolism;Isomerase;Multifunctional enzyme;NAD;Reference proteome;	5.1.3.2;5.1.3.3;5.1.3.7;	;K01784;K01785;	Unknown SUPERKINGDOM	Unknown KINGDOM	Unknown PHYLUM	Unknown CLASS	Unknown ORDER	Unknown FAMILY	Unknown GENUS	Unknown SPECIES	Unknown SUBSPECIES	0	2	1	1	0	6	2	3	2	0	0	2	1	0	0	0	0	4	0	4	0	7	6	10	10	0	2	0	0	6	0	2	6	13	0	0
Meta-Protein 1571	Metagenome unknown				Unknown SUPERKINGDOM	Unknown KINGDOM	Unknown PHYLUM	Unknown CLASS	Unknown ORDER	Unknown FAMILY	Unknown GENUS	Unknown SPECIES	Unknown SUBSPECIES	0	0	0	0	0	0	0	0	0	0	0	0	0	1	5	39	4	0	0	0	0	0	4	0	0	0	0	2	0	4	1	0	0	23	0	23
Meta-Protein 1765	Metagenome unknown				Unknown SUPERKINGDOM	Unknown KINGDOM	Unknown PHYLUM	Unknown CLASS	Unknown ORDER	Unknown FAMILY	Unknown GENUS	Unknown SPECIES	Unknown SUBSPECIES	0	13	0	0	38	12	8	3	1	5	0	0	0	0	0	0	17	2	0	19	0	7	0	5	0	0	0	0	0	0	0	2	0	8	24	0
Meta-Protein 44	BLAST_KPYM_PONAB Pyruvate kinase PKM OS=Pongo abelii GN=PKM PE=2 SV=3_Q5NVN0	3D-structure;ATP-binding;Acetylation;Allosteric enzyme;Alternative splicing;Complete proteome;Cytoplasm;Direct protein sequencing;Glycolysis;Hydroxylation;Isopeptide bond;Kinase;Magnesium;Metal-binding;Methylation;Nucleotide-binding;Nucleus;Phosphoprotein;Polymorphism;Potassium;Pyruvate;Reference proteome;Transferase;Ubl conjugation;	2.7.1.40;	;K00873;	Eukaryota	Metazoa	Chordata	Unknown CLASS	Unknown ORDER	Unknown FAMILY	Unknown GENUS	Unknown SPECIES	Unknown SUBSPECIES	0	0	0	0	0	0	12	0	0	0	0	1	0	0	0	0	0	0	0	0	1	2	0	0	0	2	0	0	0	3	77	0	0	0	0	0
Meta-Protein 13278	BLAST_BACA1_BACC1 Calcium-transporting ATPase 1 OS=Bacillus cereus (strain ATCC 10987 / NRS 248) GN=BCE_0519 PE=1 SV=1_Q73E41	ATP-binding;Calcium;Calcium transport;Cell membrane;Complete proteome;Hydrolase;Ion transport;Membrane;Metal-binding;Nucleotide-binding;Phosphoprotein;Transmembrane;Transmembrane helix;Transport;	3.6.3.8;	K01537;	Bacteria	Unknown KINGDOM	Firmicutes	Bacilli	Bacillales	Bacillaceae	Bacillus	Bacillus cereus	Bacillus cereus ATCC 10987	5	4	4	4	5	5	4	2	4	3	4	3	0	3	1	3	0	1	2	4	10	3	6	4	5	3	3	6	6	7	4	3	7	0	5	4
Meta-Protein 2142	DEF3_HUMAN Neutrophil defensin 3 OS=Homo sapiens GN=DEFA3 PE=1 SV=1	3D-structure;ADP-ribosylation;Antibiotic;Antimicrobial;Antiviral defense;Complete proteome;Defensin;Direct protein sequencing;Disulfide bond;Fungicide;Phosphoprotein;Reference proteome;Secreted;Signal;	;	;K05230;	Unknown SUPERKINGDOM	Unknown KINGDOM	Unknown PHYLUM	Unknown CLASS	Unknown ORDER	Unknown FAMILY	Unknown GENUS	Unknown SPECIES	Unknown SUBSPECIES	0	0	0	0	1	0	0	0	0	0	0	0	0	10	0	0	0	0	1	0	9	1	2	4	0	3	5	8	36	0	16	0	41	0	0	8
Meta-Protein 1709	BLAST_DLD_ARCFU D-lactate dehydrogenase (acceptor) OS=Archaeoglobus fulgidus (strain ATCC 49558 / VC-16 / DSM 4304 / JCM 9628 / NBRC 100126) GN=dld PE=1 SV=1_O29853	Cell membrane;Complete proteome;FAD;Flavoprotein;Isopeptide bond;Membrane;Mitochondrion;Oxidoreductase;Reference proteome;Transit peptide;Transmembrane;Transmembrane helix;Ubl conjugation;Zinc;	1.-.-.-;1.1.99.39;1.1.99.6;	;K00104;K18204;K21836;	Unknown SUPERKINGDOM	Unknown KINGDOM	Unknown PHYLUM	Unknown CLASS	Unknown ORDER	Unknown FAMILY	Unknown GENUS	Unknown SPECIES	Unknown SUBSPECIES	11	15	14	3	0	5	0	8	5	0	0	14	4	2	0	1	5	0	2	3	0	1	0	0	0	38	0	0	0	0	0	0	11	4	4	0
Meta-Protein 13851	BLAST_GH310_ARATH Indole-3-acetic acid-amido synthetase GH3.10 OS=Arabidopsis thaliana GN=GH3.10 PE=2 SV=1_Q9ZNS2	Complete proteome;Ligase;Reference proteome;	6.3.2.-;	K14487;	Eukaryota	Viridiplantae	Streptophyta	Unknown CLASS	Brassicales	Brassicaceae	Arabidopsis	Arabidopsis thaliana	Unknown SUBSPECIES	4	4	4	3	3	3	4	4	4	4	1	5	2	3	4	6	5	2	4	5	0	2	8	3	5	6	3	4	6	6	0	3	8	8	4	3
Meta-Protein 19353	Metagenome unknown				Unknown SUPERKINGDOM	Unknown KINGDOM	Unknown PHYLUM	Unknown CLASS	Unknown ORDER	Unknown FAMILY	Unknown GENUS	Unknown SPECIES	Unknown SUBSPECIES	5	3	1	2	5	2	0	3	4	2	0	3	8	8	1	2	1	1	2	0	12	0	8	2	11	0	6	7	9	3	11	3	9	1	3	6
Meta-Protein 795	BLAST_RS5_CLOTH 30S ribosomal protein S5 OS=Clostridium thermocellum (strain ATCC 27405 / DSM 1237 / NBRC 103400 / NCIMB 10682 / NRRL B-4536 / VPI 7372) GN=rpsE PE=3 SV=1_A3DJI9	Complete proteome;RNA-binding;Reference proteome;Ribonucleoprotein;Ribosomal protein;rRNA-binding;	;	K02988;	Unknown SUPERKINGDOM	Unknown KINGDOM	Unknown PHYLUM	Unknown CLASS	Unknown ORDER	Unknown FAMILY	Unknown GENUS	Unknown SPECIES	Unknown SUBSPECIES	34	12	0	4	10	3	11	4	9	5	2	9	0	10	3	9	5	5	3	0	0	0	0	0	6	9	0	0	2	2	0	2	5	5	0	0
Meta-Protein 14960	BLAST_SAT1_CRIGR Diamine acetyltransferase 1 OS=Cricetulus griseus GN=SAT1 PE=2 SV=1_Q9JHW6	Acyltransferase;Cytoplasm;Polymorphism;Transferase;	2.3.1.57;	K00657;	Eukaryota	Metazoa	Chordata	Mammalia	Rodentia	Cricetidae	Cricetulus	Cricetulus griseus	Unknown SUBSPECIES	8	2	0	3	9	3	5	2	3	3	2	3	3	3	3	1	3	1	3	1	23	2	1	3	7	3	4	7	6	2	0	5	8	3	5	5
Meta-Protein 595	BLAST_FUCI_BACV8 L-fucose isomerase OS=Bacteroides vulgatus (strain ATCC 8482 / DSM 1447 / JCM 5826 / NBRC 14291 / NCTC 11154) GN=fucI PE=3 SV=1_A6L048	Carbohydrate metabolism;Complete proteome;Cytoplasm;Fucose metabolism;Isomerase;Manganese;Metal-binding;Reference proteome;	5.3.1.25;	K01818;	Unknown SUPERKINGDOM	Unknown KINGDOM	Unknown PHYLUM	Unknown CLASS	Unknown ORDER	Unknown FAMILY	Unknown GENUS	Unknown SPECIES	Unknown SUBSPECIES	1	2	0	1	0	0	4	7	0	0	0	0	0	0	0	0	0	0	2	0	0	2	6	4	12	3	7	8	8	4	0	10	6	17	0	6
Meta-Protein 32	BLAST_RL2_BACV8 50S ribosomal protein L2 OS=Bacteroides vulgatus (strain ATCC 8482 / DSM 1447 / JCM 5826 / NBRC 14291 / NCTC 11154) GN=rplB PE=3 SV=1_A6KYJ2	Complete proteome;RNA-binding;Reference proteome;Ribonucleoprotein;Ribosomal protein;rRNA-binding;	;	K02886;	Unknown SUPERKINGDOM	Unknown KINGDOM	Unknown PHYLUM	Unknown CLASS	Unknown ORDER	Unknown FAMILY	Unknown GENUS	Unknown SPECIES	Unknown SUBSPECIES	2	2	2	1	0	5	0	2	0	0	0	8	0	6	0	5	0	14	5	0	0	26	11	5	10	0	0	0	25	0	0	3	9	6	0	5
Meta-Protein 14319	BLAST_GLGA_GEOTN Glycogen synthase OS=Geobacillus thermodenitrificans (strain NG80-2) GN=glgA PE=3 SV=1_A4IS20	Complete proteome;Glycogen biosynthesis;Glycosyltransferase;Reference proteome;Transferase;	2.4.1.21;	K00703;	Bacteria	Unknown KINGDOM	Firmicutes	Bacilli	Bacillales	Bacillaceae	Geobacillus	Geobacillus thermodenitrificans	Geobacillus thermodenitrificans NG80-2	8	4	5	5	8	7	7	7	10	6	3	7	4	6	4	6	5	5	5	5	3	2	3	0	2	7	1	4	0	5	2	1	4	5	3	0
Meta-Protein 13966	BLAST_QUEA_BRUSU S-adenosylmethionine:tRNA ribosyltransferase-isomerase OS=Brucella suis biovar 1 (strain 1330) GN=queA PE=3 SV=1_P65949	Complete proteome;Cytoplasm;Queuosine biosynthesis;Reference proteome;S-adenosyl-L-methionine;Transferase;	2.4.99.17;	K07568;	Bacteria	Unknown KINGDOM	Proteobacteria	Alphaproteobacteria	Rhizobiales	Brucellaceae	Brucella	Unknown SPECIES	Unknown SUBSPECIES	3	4	4	4	3	5	4	4	4	5	4	3	5	5	2	4	2	4	4	3	3	3	6	4	3	3	4	4	5	5	5	5	2	0	6	5
Meta-Protein 1357	Metagenome unknown	3D-structure;Complete proteome;DNA condensation;DNA-binding;Direct protein sequencing;Phosphoprotein;Reference proteome;Virulence;	;	;K03530;	Unknown SUPERKINGDOM	Unknown KINGDOM	Unknown PHYLUM	Unknown CLASS	Unknown ORDER	Unknown FAMILY	Unknown GENUS	Unknown SPECIES	Unknown SUBSPECIES	0	0	2	0	0	1	5	0	1	0	0	3	0	0	0	0	0	0	0	0	32	0	0	0	0	0	7	31	0	0	1	0	1	0	0	0
Meta-Protein 2995	PRO25_ORYSJ 13 kDa prolamin C OS=Oryza sativa subsp. japonica GN=PROLM25 PE=2 SV=2	Complete proteome;Reference proteome;Seed storage protein;Signal;Storage protein;Vacuole;	;	;	Eukaryota	Viridiplantae	Streptophyta	Liliopsida	Poales	Poaceae	Oryza	Oryza sativa	Oryza sativa Japonica Group	0	8	2	0	15	0	0	9	4	6	0	15	2	1	0	9	0	0	0	0	0	14	0	0	0	3	0	0	46	9	0	0	20	27	0	0
Meta-Protein 114	BLAST_SYS_SALRD Serine--tRNA ligase OS=Salinibacter ruber (strain DSM 13855 / M31) GN=serS PE=3 SV=1_Q2S1G4	ATP-binding;Aminoacyl-tRNA synthetase;Complete proteome;Cytoplasm;Ligase;Nucleotide-binding;Protein biosynthesis;Reference proteome;	6.1.1.11;	K01875;	Unknown SUPERKINGDOM	Unknown KINGDOM	Unknown PHYLUM	Unknown CLASS	Unknown ORDER	Unknown FAMILY	Unknown GENUS	Unknown SPECIES	Unknown SUBSPECIES	0	6	8	3	0	4	12	4	6	0	0	7	1	6	0	0	3	1	1	5	0	16	7	0	9	2	4	0	2	0	1	6	4	9	2	6
Meta-Protein 3931	Metagenome unknown				Unknown SUPERKINGDOM	Unknown KINGDOM	Unknown PHYLUM	Unknown CLASS	Unknown ORDER	Unknown FAMILY	Unknown GENUS	Unknown SPECIES	Unknown SUBSPECIES	24	0	0	0	122	5	7	0	0	0	0	5	0	4	0	0	0	0	0	0	0	0	0	0	0	10	0	0	0	9	0	0	0	0	0	0
Meta-Protein 3413	Metagenome unknown				Unknown SUPERKINGDOM	Unknown KINGDOM	Unknown PHYLUM	Unknown CLASS	Unknown ORDER	Unknown FAMILY	Unknown GENUS	Unknown SPECIES	Unknown SUBSPECIES	0	0	0	0	0	0	0	0	0	0	0	0	0	0	0	0	0	0	0	0	0	0	0	0	157	0	0	0	0	0	0	0	0	77	0	0
Meta-Protein 2419	Metagenome unknown				Unknown SUPERKINGDOM	Unknown KINGDOM	Unknown PHYLUM	Unknown CLASS	Unknown ORDER	Unknown FAMILY	Unknown GENUS	Unknown SPECIES	Unknown SUBSPECIES	0	0	29	1	16	3	0	0	0	3	0	18	0	0	4	0	5	0	4	0	0	0	0	0	0	0	0	0	0	0	0	0	50	0	0	11
Meta-Protein 19944	BLAST_RPSX_BACTK Putative RNA polymerase sigma-G factor (Fragment) OS=Bacillus thuringiensis subsp. kurstaki PE=3 SV=1_P26768	DNA-binding;Sigma factor;Transcription;Transcription regulation;	;	;	Bacteria	Unknown KINGDOM	Firmicutes	Bacilli	Bacillales	Bacillaceae	Bacillus	Bacillus thuringiensis	Bacillus thuringiensis serovar kurstaki	3	4	3	0	1	5	2	5	5	5	2	5	0	0	3	1	3	5	2	4	7	5	4	3	6	5	3	7	4	5	2	3	5	5	0	0
Meta-Protein 1264	Metagenome unknown	3D-structure;Chemotaxis;Complete proteome;Direct protein sequencing;Disulfide bond;Endonuclease;Glycoprotein;Hydrolase;Lysosome;Nitration;Nuclease;Polymorphism;Reference proteome;Signal;	3.1.27.5;	;K01168;	Unknown SUPERKINGDOM	Unknown KINGDOM	Unknown PHYLUM	Unknown CLASS	Unknown ORDER	Unknown FAMILY	Unknown GENUS	Unknown SPECIES	Unknown SUBSPECIES	8	0	0	0	14	0	4	0	0	0	0	0	0	4	0	0	0	0	0	0	22	6	0	0	0	0	10	5	24	0	20	0	75	0	0	6
Meta-Protein 1704	BLAST_ARGD_BACAM Acetylornithine aminotransferase (Fragment) OS=Bacillus amyloliquefaciens GN=argD PE=3 SV=1_Q9ZJ10	Amino-acid biosynthesis;Aminotransferase;Arginine biosynthesis;Complete proteome;Cytoplasm;Pyridoxal phosphate;Reference proteome;Transferase;	2.6.1.11;	;K00821;	Bacteria	Unknown KINGDOM	Unknown PHYLUM	Unknown CLASS	Unknown ORDER	Unknown FAMILY	Unknown GENUS	Unknown SPECIES	Unknown SUBSPECIES	8	3	0	0	4	0	7	0	0	0	0	10	0	1	0	0	0	2	0	1	0	0	0	4	24	5	0	0	0	58	0	8	0	0	0	0
Meta-Protein 966	BLAST_RL18_AGARV 50S ribosomal protein L18 OS=Agathobacter rectalis (strain ATCC 33656 / DSM 3377 / JCM 17463 / KCTC 5835 / VPI 0990) GN=rplR PE=3 SV=1_C4ZBT4	Complete proteome;RNA-binding;Reference proteome;Ribonucleoprotein;Ribosomal protein;rRNA-binding;	;	K02881;	Bacteria	Unknown KINGDOM	Firmicutes	Clostridia	Clostridiales	Eubacteriaceae	Eubacterium	Unknown SPECIES	Unknown SUBSPECIES	17	8	0	5	4	5	4	4	4	2	2	7	0	4	11	8	2	0	0	0	0	0	7	0	4	13	1	4	2	5	0	2	5	4	1	0
Meta-Protein 1230	BLAST_G3P_LACDE Glyceraldehyde-3-phosphate dehydrogenase OS=Lactobacillus delbrueckii subsp. bulgaricus GN=gap PE=3 SV=1_O32755	Cytoplasm;Glycolysis;NAD;Nucleotide-binding;Oxidoreductase;	1.2.1.12;	;	Unknown SUPERKINGDOM	Unknown KINGDOM	Unknown PHYLUM	Unknown CLASS	Unknown ORDER	Unknown FAMILY	Unknown GENUS	Unknown SPECIES	Unknown SUBSPECIES	0	0	0	0	0	0	0	2	0	33	0	0	0	0	0	0	0	0	0	3	0	0	0	0	0	0	0	5	0	0	0	0	0	0	0	0
Meta-Protein 13932	BLAST_TMP_BPP2 Probable tape measure protein OS=Escherichia phage P2 GN=T PE=3 SV=1_O64314	Coiled coil;Complete proteome;Reference proteome;Viral release from host cell;Viral tail assembly;	;	;	Viruses	Unknown KINGDOM	Unknown PHYLUM	Unknown CLASS	Caudovirales	Myoviridae	P2likeviruses	Enterobacteria phage P2	Unknown SUBSPECIES	5	2	2	9	3	2	6	4	1	3	2	3	14	11	1	0	4	1	0	1	0	2	2	1	9	0	11	6	6	6	3	5	5	1	5	9
Meta-Protein 1678	BLAST_EUTE_SALTY Ethanolamine utilization protein EutE OS=Salmonella typhimurium (strain LT2 / SGSC1412 / ATCC 700720) GN=eutE PE=4 SV=2_P41793	Complete proteome;Oxidoreductase;Reference proteome;	;	K04021;	Bacteria	Unknown KINGDOM	Proteobacteria	Gammaproteobacteria	Enterobacteriales	Enterobacteriaceae	Unknown GENUS	Unknown SPECIES	Unknown SUBSPECIES	13	21	1	3	29	1	16	16	8	0	0	12	5	7	1	10	4	0	1	4	0	0	0	0	0	7	4	0	0	0	0	0	4	0	6	0
Meta-Protein 4527	BLAST_PRO20_ORYSJ Prolamin PPROL 14P OS=Oryza sativa subsp. japonica GN=PROLM20 PE=2 SV=1_Q42465	Complete proteome;Pyrrolidone carboxylic acid;Reference proteome;Seed storage protein;Signal;Storage protein;Vacuole;	;	;	Eukaryota	Viridiplantae	Streptophyta	Liliopsida	Poales	Poaceae	Oryza	Oryza sativa	Oryza sativa Japonica Group	0	0	0	0	2	0	0	2	0	0	0	8	4	0	0	0	0	2	0	0	0	36	0	0	0	9	0	0	61	8	0	0	28	36	0	0
Meta-Protein 16809	MUTL_CHLPB DNA mismatch repair protein MutL OS=Chlorobium phaeobacteroides (strain BS1) GN=mutL PE=3 SV=1	Complete proteome;DNA damage;DNA repair;Reference proteome;	;	K03572;	Bacteria	Unknown KINGDOM	Chlorobi	Chlorobia	Chlorobiales	Chlorobiaceae	Chlorobium	Chlorobium phaeobacteroides	Chlorobium phaeobacteroides BS1	1	2	2	1	5	2	0	1	0	1	0	1	1	2	0	3	4	0	1	0	3	0	3	4	7	3	9	7	4	8	5	5	6	2	0	4
Meta-Protein 13967	BLAST_ACRR_ECOLI HTH-type transcriptional regulator AcrR OS=Escherichia coli (strain K12) GN=acrR PE=1 SV=1_P0ACS9	3D-structure;Complete proteome;DNA-binding;Reference proteome;Repressor;Transcription;Transcription regulation;	;	K03577;	Bacteria	Unknown KINGDOM	Proteobacteria	Gammaproteobacteria	Enterobacteriales	Enterobacteriaceae	Unknown GENUS	Unknown SPECIES	Unknown SUBSPECIES	3	4	4	4	3	5	4	4	4	5	4	3	5	5	2	3	2	4	2	3	3	3	6	4	3	3	4	4	5	5	5	5	2	0	6	4
Meta-Protein 2782	BLAST_RL7_BIFAA 50S ribosomal protein L7/L12 OS=Bifidobacterium adolescentis (strain ATCC 15703 / DSM 20083 / NCTC 11814 / E194a) GN=rplL PE=3 SV=1_A1A033	Complete proteome;Reference proteome;Ribonucleoprotein;Ribosomal protein;	;	K02935;	Unknown SUPERKINGDOM	Unknown KINGDOM	Unknown PHYLUM	Unknown CLASS	Unknown ORDER	Unknown FAMILY	Unknown GENUS	Unknown SPECIES	Unknown SUBSPECIES	3	8	8	6	19	6	41	4	13	4	0	0	9	7	0	0	0	0	0	2	0	0	17	0	0	8	8	6	0	0	10	2	7	7	6	0
Meta-Protein 14789	BLAST_PBPA_MYCS2 Penicillin-binding protein A OS=Mycobacterium smegmatis (strain ATCC 700084 / mc(2)155) GN=pbpA PE=3 SV=1_A0QNG3	Cell membrane;Cell shape;Cell wall biogenesis/degradation;Complete proteome;Membrane;Peptidoglycan synthesis;Phosphoprotein;Reference proteome;Signal-anchor;Transmembrane;Transmembrane helix;	;	K05364;	Bacteria	Unknown KINGDOM	Actinobacteria	Actinobacteria	Actinomycetales	Mycobacteriaceae	Mycobacterium	Mycobacterium smegmatis	Mycobacterium smegmatis str. MC2 155	1	5	6	0	0	6	10	7	13	7	0	4	7	6	1	0	2	0	0	3	0	8	0	6	0	7	5	0	0	2	0	7	2	4	7	0
Meta-Protein 214	RL7_BACFR 50S ribosomal protein L7/L12 OS=Bacteroides fragilis (strain YCH46) GN=rplL PE=3 SV=1	Complete proteome;Reference proteome;Ribonucleoprotein;Ribosomal protein;	;	K02935;	Unknown SUPERKINGDOM	Unknown KINGDOM	Unknown PHYLUM	Unknown CLASS	Unknown ORDER	Unknown FAMILY	Unknown GENUS	Unknown SPECIES	Unknown SUBSPECIES	0	4	11	0	0	0	3	2	15	1	0	9	0	3	0	3	0	0	0	5	0	1	5	8	4	9	5	0	0	6	0	4	6	24	0	4
Meta-Protein 17377	Y1235_THEP1 UPF0758 protein Tpet_1235 OS=Thermotoga petrophila (strain RKU-1 / ATCC BAA-488 / DSM 13995) GN=Tpet_1235 PE=3 SV=1	Complete proteome;Hydrolase;Metal-binding;Metalloprotease;Protease;Zinc;	;	K03630;	Bacteria	Unknown KINGDOM	Thermotogae	Thermotogae	Thermotogales	Thermotogaceae	Thermotoga	Thermotoga petrophila	Thermotoga petrophila RKU-1	0	0	0	0	0	0	0	0	0	1	0	0	0	0	0	0	0	0	0	7	27	0	6	2	10	0	5	11	1	1	0	10	6	0	1	15
Meta-Protein 1279	Metagenome unknown				Unknown SUPERKINGDOM	Unknown KINGDOM	Unknown PHYLUM	Unknown CLASS	Unknown ORDER	Unknown FAMILY	Unknown GENUS	Unknown SPECIES	Unknown SUBSPECIES	0	0	0	0	0	0	0	0	0	0	0	0	0	0	5	0	0	0	0	0	0	0	7	0	1	0	0	33	36	0	0	0	2	0	0	49
Meta-Protein 22005	ACT_ASPOR Actin OS=Aspergillus oryzae (strain ATCC 42149 / RIB 40) GN=act1 PE=3 SV=1	ATP-binding;Complete proteome;Cytoplasm;Cytoskeleton;Nucleotide-binding;Reference proteome;	;	K05692;	Eukaryota	Fungi	Ascomycota	Eurotiomycetes	Eurotiales	Trichocomaceae	Aspergillus	Aspergillus oryzae	Aspergillus oryzae RIB40	1	5	2	0	0	4	4	2	8	1	3	2	0	6	1	0	3	4	1	0	2	7	0	10	1	5	8	10	3	0	8	0	0	2	0	0
Meta-Protein 1413	Metagenome unknown	ATP-binding;Chaperone;Complete proteome;Direct protein sequencing;Nucleotide-binding;Reference proteome;Repeat;Virulence;	;	K04086;	Unknown SUPERKINGDOM	Unknown KINGDOM	Unknown PHYLUM	Unknown CLASS	Unknown ORDER	Unknown FAMILY	Unknown GENUS	Unknown SPECIES	Unknown SUBSPECIES	2	1	0	0	0	0	27	1	0	1	0	3	1	0	1	0	0	0	0	4	78	0	2	1	1	0	1	18	0	7	0	0	0	0	0	1
Meta-Protein 18847	Metagenome unknown				Unknown SUPERKINGDOM	Unknown KINGDOM	Unknown PHYLUM	Unknown CLASS	Unknown ORDER	Unknown FAMILY	Unknown GENUS	Unknown SPECIES	Unknown SUBSPECIES	2	2	2	4	3	0	5	1	4	3	4	0	3	4	2	4	3	0	1	1	6	5	6	2	7	0	7	6	5	2	5	4	3	2	6	4
Meta-Protein 2351	Metagenome unknown				Unknown SUPERKINGDOM	Unknown KINGDOM	Unknown PHYLUM	Unknown CLASS	Unknown ORDER	Unknown FAMILY	Unknown GENUS	Unknown SPECIES	Unknown SUBSPECIES	0	6	0	0	0	0	0	0	0	0	0	0	0	0	0	0	0	0	13	0	0	6	0	0	0	0	0	0	0	0	0	12	0	0	0	0
Meta-Protein 1234	BLAST_FLA_BACHD Flagellin OS=Bacillus halodurans (strain ATCC BAA-125 / DSM 18197 / FERM 7344 / JCM 9153 / C-125) GN=hag PE=1 SV=1_Q05203	Bacterial flagellum;Complete proteome;Direct protein sequencing;Reference proteome;Secreted;	;	;K02406;	Unknown SUPERKINGDOM	Unknown KINGDOM	Unknown PHYLUM	Unknown CLASS	Unknown ORDER	Unknown FAMILY	Unknown GENUS	Unknown SPECIES	Unknown SUBSPECIES	0	0	32	0	18	0	0	0	13	0	0	0	14	0	0	0	0	0	0	15	0	0	0	0	0	68	0	0	0	0	0	0	0	16	0	0
Meta-Protein 12873	BLAST_YAAH_BACSU Spore germination protein YaaH OS=Bacillus subtilis (strain 168) GN=yaaH PE=2 SV=1_P37531	Complete proteome;Germination;Reference proteome;Repeat;	;	K06306;	Bacteria	Unknown KINGDOM	Firmicutes	Bacilli	Bacillales	Bacillaceae	Bacillus	Bacillus subtilis subsp. subtilis str. 168	Bacillus subtilis subsp. subtilis	6	2	0	2	8	2	3	3	3	2	2	2	3	2	0	0	3	0	1	3	8	1	3	6	5	0	5	6	4	3	4	9	5	3	5	1
Meta-Protein 2282	BLAST_ACEA_SALTY Isocitrate lyase OS=Salmonella typhimurium (strain LT2 / SGSC1412 / ATCC 700720) GN=aceA PE=3 SV=2_P51066	3D-structure;Complete proteome;Direct protein sequencing;Glyoxylate bypass;Lyase;Magnesium;Manganese;Metal-binding;Phosphoprotein;Reference proteome;Tricarboxylic acid cycle;	4.1.3.1;	K01637;	Unknown SUPERKINGDOM	Unknown KINGDOM	Unknown PHYLUM	Unknown CLASS	Unknown ORDER	Unknown FAMILY	Unknown GENUS	Unknown SPECIES	Unknown SUBSPECIES	0	0	0	0	0	0	0	46	0	0	0	0	0	0	0	0	0	0	0	0	0	0	0	0	17	0	0	0	0	0	0	0	0	0	0	0
Meta-Protein 436	BLAST_CUCIN_ORYSI Cupincin OS=Oryza sativa subsp. indica GN=OsI_13867 PE=1 SV=1_B8AL97	Allergen;Complete proteome;Direct protein sequencing;Glycoprotein;Hydrolase;Metal-binding;Metalloprotease;Protease;Reference proteome;Secreted;Seed storage protein;Signal;Storage protein;Zinc;	3.4.-.-;	;	Eukaryota	Viridiplantae	Streptophyta	Liliopsida	Poales	Poaceae	Oryza	Oryza sativa	Unknown SUBSPECIES	2	3	5	0	0	20	1	1	0	13	0	0	1	3	10	0	0	2	0	13	0	0	4	0	0	8	3	0	2	2	4	0	5	9	0	1
Meta-Protein 15541	BLAST_MALH_FUSMR Maltose-6-phosphate glucosidase OS=Fusobacterium mortiferum GN=malH PE=1 SV=1_O06901	Carbohydrate metabolism;Cobalt;Direct protein sequencing;Glycosidase;Hydrolase;Iron;Manganese;Metal-binding;NAD;Nickel;	3.2.1.122;	K01232;	Bacteria	Unknown KINGDOM	Fusobacteria	Fusobacteriia	Fusobacteriales	Fusobacteriaceae	Fusobacterium	Fusobacterium mortiferum	Unknown SUBSPECIES	3	2	3	2	1	1	4	1	2	2	1	0	2	2	4	0	1	1	1	3	5	2	4	3	3	0	6	5	6	2	6	6	5	2	5	2
Meta-Protein 3311	PNP_AZOPC Polyribonucleotide nucleotidyltransferase OS=Azobacteroides pseudotrichonymphae genomovar. CFP2 GN=pnp PE=3 SV=1	Complete proteome;Cytoplasm;Magnesium;Metal-binding;Nucleotidyltransferase;RNA-binding;Reference proteome;Transferase;	2.7.7.8;	K00962;	Unknown SUPERKINGDOM	Unknown KINGDOM	Unknown PHYLUM	Unknown CLASS	Unknown ORDER	Unknown FAMILY	Unknown GENUS	Unknown SPECIES	Unknown SUBSPECIES	0	0	0	0	2	21	45	0	0	0	0	0	0	0	0	0	0	8	0	0	0	31	0	4	0	0	0	0	0	0	0	0	0	0	6	0
Meta-Protein 19383	BLAST_MTNN_EXISA 5-methylthioadenosine/S-adenosylhomocysteine nucleosidase OS=Exiguobacterium sp. (strain ATCC BAA-1283 / AT1b) GN=mtnN PE=3 SV=1_C4L559	Amino-acid biosynthesis;Complete proteome;Hydrolase;Methionine biosynthesis;Reference proteome;	3.2.2.9;	K01243;	Bacteria	Unknown KINGDOM	Firmicutes	Bacilli	Bacillales	Unknown FAMILY	Exiguobacterium	Exiguobacterium sp. AT1b	Unknown SUBSPECIES	1	0	0	1	0	2	6	2	4	1	2	0	2	2	0	0	0	0	0	4	2	0	5	15	5	4	5	4	5	2	3	1	7	4	7	6
Meta-Protein 917	BLAST_KPYK_CORGL Pyruvate kinase OS=Corynebacterium glutamicum (strain ATCC 13032 / DSM 20300 / JCM 1318 / LMG 3730 / NCIMB 10025) GN=pyk PE=1 SV=1_Q46078	ATP-binding;Chloroplast;Complete proteome;Glycolysis;Kinase;Magnesium;Metal-binding;Nucleotide-binding;Plasmid;Plastid;Potassium;Pyruvate;Reference proteome;Transferase;Transit peptide;	2.7.1.40;	;K00873;	Unknown SUPERKINGDOM	Unknown KINGDOM	Unknown PHYLUM	Unknown CLASS	Unknown ORDER	Unknown FAMILY	Unknown GENUS	Unknown SPECIES	Unknown SUBSPECIES	0	19	4	2	4	19	29	4	30	5	0	0	10	10	0	0	0	0	0	9	0	0	12	0	0	4	10	3	0	0	0	1	12	0	13	0
Meta-Protein 1106	BLAST_ADHE_ECOLI Aldehyde-alcohol dehydrogenase OS=Escherichia coli (strain K12) GN=adhE PE=1 SV=2_P0A9Q7	Acetylation;Complete proteome;Direct protein sequencing;Iron;Multifunctional enzyme;NAD;Oxidoreductase;Reference proteome;	1.1.-.-;1.1.1.1;1.2.1.10;	K04022;K04072;	Bacteria	Unknown KINGDOM	Unknown PHYLUM	Unknown CLASS	Unknown ORDER	Unknown FAMILY	Unknown GENUS	Unknown SPECIES	Unknown SUBSPECIES	0	40	0	0	0	10	0	45	0	0	0	19	0	0	0	0	36	10	0	0	0	0	0	0	0	1	0	0	0	0	0	0	0	46	0	0
Meta-Protein 18848	BLAST_PBPB_ECOLI Penicillin-binding protein 1B OS=Escherichia coli (strain K12) GN=mrcB PE=1 SV=2_P02919	3D-structure;Alternative initiation;Antibiotic resistance;Carboxypeptidase;Cell inner membrane;Cell membrane;Cell shape;Cell wall biogenesis/degradation;Complete proteome;Direct protein sequencing;Glycosyltransferase;Hydrolase;Membrane;Multifunctional enzyme;Peptidoglycan synthesis;Protease;Reference proteome;Signal-anchor;Transferase;Transmembrane;Transmembrane helix;	2.4.1.129;3.4.16.4;	K05365;	Bacteria	Unknown KINGDOM	Proteobacteria	Gammaproteobacteria	Enterobacteriales	Enterobacteriaceae	Escherichia	Escherichia coli	Escherichia coli K-12	2	2	2	4	3	0	5	1	4	3	4	0	3	4	2	2	3	0	1	1	5	5	6	2	9	0	7	6	5	2	5	4	3	2	6	4
Meta-Protein 14309	BLAST_SCPC_ECOLI Propionyl-CoA:succinate CoA transferase OS=Escherichia coli (strain K12) GN=scpC PE=1 SV=1_P52043	Complete proteome;Reference proteome;Transferase;	2.8.3.-;	K22214;	Bacteria	Unknown KINGDOM	Proteobacteria	Gammaproteobacteria	Enterobacteriales	Enterobacteriaceae	Escherichia	Escherichia coli	Escherichia coli K-12	3	6	5	2	2	6	4	5	6	6	2	6	4	0	2	3	1	4	2	4	6	4	2	3	5	3	2	5	4	4	2	2	4	3	3	0
Meta-Protein 1317	Metagenome unknown	4Fe-4S;Complete proteome;Iron;Iron-sulfur;Metal-binding;Nickel;Oxidoreductase;Reference proteome;	1.2.7.4;	K00198;	Unknown SUPERKINGDOM	Unknown KINGDOM	Unknown PHYLUM	Unknown CLASS	Unknown ORDER	Unknown FAMILY	Unknown GENUS	Unknown SPECIES	Unknown SUBSPECIES	9	9	2	0	12	1	6	0	4	2	0	13	3	8	0	1	11	1	2	2	0	0	12	2	0	9	0	2	0	6	0	0	8	15	4	0
Meta-Protein 13852	SEC31_LODEL Protein transport protein SEC31 OS=Lodderomyces elongisporus (strain ATCC 11503 / CBS 2605 / JCM 1781 / NBRC 1676 / NRRL YB-4239) GN=SEC31 PE=3 SV=1	Complete proteome;Cytoplasmic vesicle;Endoplasmic reticulum;ER-Golgi transport;Membrane;Protein transport;Reference proteome;Repeat;Transport;WD repeat;	;	K14005;	Eukaryota	Fungi	Ascomycota	Saccharomycetes	Saccharomycetales	Debaryomycetaceae	Lodderomyces	Lodderomyces elongisporus	Lodderomyces elongisporus NRRL YB-4239	4	4	4	3	3	3	4	4	4	4	1	5	2	3	4	4	5	2	4	5	0	1	7	3	5	6	3	4	6	6	0	3	6	6	4	3
Meta-Protein 269	HVM23_MOUSE Ig heavy chain V region HPCG8 OS=Mus musculus PE=1 SV=1	3D-structure;Complete proteome;Direct protein sequencing;Hybridoma;Immunoglobulin V region;Immunoglobulin domain;Reference proteome;	;	;	Eukaryota	Metazoa	Chordata	Mammalia	Rodentia	Muridae	Mus	Mus musculus	Unknown SUBSPECIES	6	0	0	0	0	4	7	0	1	0	0	0	0	0	0	0	0	0	0	0	14	0	6	7	30	0	4	2	19	9	5	3	7	0	0	5
Meta-Protein 397	BLAST_CRH_BACHD HPr-like protein Crh OS=Bacillus halodurans (strain ATCC BAA-125 / DSM 18197 / FERM 7344 / JCM 9153 / C-125) GN=crh PE=3 SV=1_Q9K708	3D-structure;Complete proteome;Cytoplasm;Kinase;Phosphoprotein;Phosphotransferase system;Reference proteome;Repeat;Sugar transport;Transcription;Transcription regulation;Transferase;Transport;	;	;K02768;K11183;K11184;K11189;	Bacteria	Unknown KINGDOM	Unknown PHYLUM	Unknown CLASS	Unknown ORDER	Unknown FAMILY	Unknown GENUS	Unknown SPECIES	Unknown SUBSPECIES	2	5	8	0	0	10	4	7	8	2	0	2	4	0	0	1	5	0	2	0	0	5	0	0	0	9	3	0	0	0	0	10	0	6	9	0
Meta-Protein 556	BLAST_CHVE_AGRFC Multiple sugar-binding periplasmic receptor ChvE OS=Agrobacterium fabrum (strain C58 / ATCC 33970) GN=chvE PE=1 SV=2_P25548	3D-structure;Chemotaxis;Complete proteome;Crown gall tumor;Periplasm;Reference proteome;Signal;	;	K10546;	Unknown SUPERKINGDOM	Unknown KINGDOM	Unknown PHYLUM	Unknown CLASS	Unknown ORDER	Unknown FAMILY	Unknown GENUS	Unknown SPECIES	Unknown SUBSPECIES	0	1	8	3	1	3	0	4	18	8	0	10	5	0	0	0	8	0	1	7	0	3	0	7	0	19	0	0	0	9	0	0	0	25	0	0
Meta-Protein 23347	Metagenome unknown				Unknown SUPERKINGDOM	Unknown KINGDOM	Unknown PHYLUM	Unknown CLASS	Unknown ORDER	Unknown FAMILY	Unknown GENUS	Unknown SPECIES	Unknown SUBSPECIES	12	0	0	0	1	0	6	0	9	1	1	0	0	6	0	4	0	0	0	1	8	0	6	7	9	0	9	5	5	9	20	8	7	0	0	3
Meta-Protein 675	BLAST_DHA_MYCS2 Alanine dehydrogenase OS=Mycobacterium smegmatis (strain ATCC 700084 / mc(2)155) GN=ald PE=1 SV=1_A0QVQ8	Complete proteome;Cytoplasm;Direct protein sequencing;Magnesium;Metal-binding;NAD;Nucleotide-binding;Oxidoreductase;Reference proteome;	1.4.1.1;	K00259;	Unknown SUPERKINGDOM	Unknown KINGDOM	Unknown PHYLUM	Unknown CLASS	Unknown ORDER	Unknown FAMILY	Unknown GENUS	Unknown SPECIES	Unknown SUBSPECIES	0	0	0	0	0	0	0	0	0	0	0	1	0	0	0	0	0	0	0	0	0	0	10	4	20	2	8	4	4	5	0	7	21	12	0	0
Meta-Protein 178	Metagenome unknown				Unknown SUPERKINGDOM	Unknown KINGDOM	Unknown PHYLUM	Unknown CLASS	Unknown ORDER	Unknown FAMILY	Unknown GENUS	Unknown SPECIES	Unknown SUBSPECIES	0	0	82	0	0	0	0	0	0	0	0	18	0	0	0	0	0	0	0	17	0	0	0	0	0	5	0	0	0	0	0	0	0	0	0	0
Meta-Protein 237	BLAST_AMY1_ECOLI Periplasmic alpha-amylase OS=Escherichia coli (strain K12) GN=malS PE=1 SV=1_P25718	3D-structure;Calcium;Carbohydrate metabolism;Cellulose degradation;Complete proteome;Direct protein sequencing;Disulfide bond;Glycosidase;Glycosyltransferase;Hydrolase;Metal-binding;Periplasm;Polysaccharide degradation;Reference proteome;Repeat;Secreted;Signal;Transferase;Xylan degradation;	2.4.1.19;3.2.1.1;3.2.1.133;3.2.1.4;3.2.1.8;	;K01176;	Unknown SUPERKINGDOM	Unknown KINGDOM	Unknown PHYLUM	Unknown CLASS	Unknown ORDER	Unknown FAMILY	Unknown GENUS	Unknown SPECIES	Unknown SUBSPECIES	0	0	19	0	0	0	0	0	0	0	0	26	0	0	0	0	0	0	0	36	0	0	0	0	0	0	0	0	0	0	0	0	0	0	0	0
Meta-Protein 23624	BLAST_DARB_BPP1 Defense against restriction protein B OS=Escherichia phage P1 GN=darB PE=3 SV=1_Q71TF8	ATP-binding;Coiled coil;Complete proteome;Helicase;Host-virus interaction;Hydrolase;Nucleotide-binding;Reference proteome;Restriction-modification system evasion by virus;Virion;	3.6.4.-;	;	Viruses	Unknown KINGDOM	Unknown PHYLUM	Unknown CLASS	Caudovirales	Myoviridae	Punalikevirus	Enterobacteria phage P1	Unknown SUBSPECIES	3	2	0	3	1	4	4	1	3	2	4	2	4	4	1	1	4	1	0	3	5	3	5	5	6	2	4	5	5	3	5	2	5	4	6	6
Meta-Protein 990	BLAST_ALF1_CHLPN Probable fructose-bisphosphate aldolase class 1 OS=Chlamydia pneumoniae GN=fbaB PE=3 SV=1_Q9Z8Q7	Acetylation;Complete proteome;Cytoplasm;Direct protein sequencing;Glycolysis;Lyase;Reference proteome;Schiff base;	4.1.2.13;	K11645;	Unknown SUPERKINGDOM	Unknown KINGDOM	Unknown PHYLUM	Unknown CLASS	Unknown ORDER	Unknown FAMILY	Unknown GENUS	Unknown SPECIES	Unknown SUBSPECIES	0	3	0	0	13	0	0	6	0	0	4	8	0	0	5	0	7	1	0	2	0	17	0	3	16	0	1	19	2	10	0	8	3	0	0	17
Meta-Protein 355	BLAST_RL4_AGARV 50S ribosomal protein L4 OS=Agathobacter rectalis (strain ATCC 33656 / DSM 3377 / JCM 17463 / KCTC 5835 / VPI 0990) GN=rplD PE=3 SV=1_C4ZBD5	Complete proteome;RNA-binding;Reference proteome;Ribonucleoprotein;Ribosomal protein;rRNA-binding;	;	K02926;	Unknown SUPERKINGDOM	Unknown KINGDOM	Unknown PHYLUM	Unknown CLASS	Unknown ORDER	Unknown FAMILY	Unknown GENUS	Unknown SPECIES	Unknown SUBSPECIES	0	9	1	9	0	0	2	10	13	12	0	10	4	6	3	3	7	0	3	0	0	0	0	0	4	4	1	3	2	0	0	1	0	0	3	17
Meta-Protein 13853	Metagenome unknown				Unknown SUPERKINGDOM	Unknown KINGDOM	Unknown PHYLUM	Unknown CLASS	Unknown ORDER	Unknown FAMILY	Unknown GENUS	Unknown SPECIES	Unknown SUBSPECIES	4	4	4	3	3	3	4	4	4	4	1	5	2	3	4	4	5	2	3	5	0	1	7	4	5	5	3	3	6	6	0	3	6	6	4	3
Meta-Protein 19097	BLAST_YCLK_BACSU Sensor histidine kinase YclK OS=Bacillus subtilis (strain 168) GN=yclK PE=3 SV=1_P94414	ATP-binding;Cell membrane;Complete proteome;Kinase;Membrane;Nucleotide-binding;Phosphoprotein;Reference proteome;Transferase;Transmembrane;Transmembrane helix;Two-component regulatory system;	2.7.13.3;	;	Bacteria	Unknown KINGDOM	Firmicutes	Bacilli	Bacillales	Bacillaceae	Bacillus	Bacillus subtilis subsp. subtilis str. 168	Bacillus subtilis subsp. subtilis	5	5	4	0	5	4	5	4	6	3	4	4	0	5	3	4	3	4	4	2	4	4	0	4	4	3	4	4	5	4	6	0	5	2	0	4
Meta-Protein 14790	Metagenome unknown				Unknown SUPERKINGDOM	Unknown KINGDOM	Unknown PHYLUM	Unknown CLASS	Unknown ORDER	Unknown FAMILY	Unknown GENUS	Unknown SPECIES	Unknown SUBSPECIES	0	6	10	0	1	8	7	7	7	7	0	5	7	3	0	0	2	0	2	3	0	8	0	6	0	4	3	0	0	0	0	8	3	5	7	0
Meta-Protein 336	BLAST_PGK_BACTN Phosphoglycerate kinase OS=Bacteroides thetaiotaomicron (strain ATCC 29148 / DSM 2079 / NCTC 10582 / E50 / VPI-5482) GN=pgk PE=3 SV=1_Q8A753	ATP-binding;Complete proteome;Cytoplasm;Glycolysis;Kinase;Nucleotide-binding;Reference proteome;Transferase;	2.7.2.3;	K00927;	Unknown SUPERKINGDOM	Unknown KINGDOM	Unknown PHYLUM	Unknown CLASS	Unknown ORDER	Unknown FAMILY	Unknown GENUS	Unknown SPECIES	Unknown SUBSPECIES	2	1	0	0	0	0	0	6	14	0	0	24	0	0	0	0	7	0	1	11	0	0	5	3	8	17	0	0	0	11	0	0	0	14	2	0
Meta-Protein 19096	Metagenome unknown				Unknown SUPERKINGDOM	Unknown KINGDOM	Unknown PHYLUM	Unknown CLASS	Unknown ORDER	Unknown FAMILY	Unknown GENUS	Unknown SPECIES	Unknown SUBSPECIES	5	5	4	0	5	4	5	4	6	3	4	4	0	5	3	3	3	4	4	2	4	4	0	4	4	3	4	4	5	4	6	0	5	2	0	4
Meta-Protein 483	BLAST_RS4_BACV8 30S ribosomal protein S4 OS=Bacteroides vulgatus (strain ATCC 8482 / DSM 1447 / JCM 5826 / NBRC 14291 / NCTC 11154) GN=rpsD PE=3 SV=1_A6KYH1	Complete proteome;RNA-binding;Reference proteome;Ribonucleoprotein;Ribosomal protein;rRNA-binding;	;	K02986;	Unknown SUPERKINGDOM	Unknown KINGDOM	Unknown PHYLUM	Unknown CLASS	Unknown ORDER	Unknown FAMILY	Unknown GENUS	Unknown SPECIES	Unknown SUBSPECIES	0	4	0	0	2	13	18	0	0	0	0	2	0	0	0	2	0	15	0	0	0	31	6	2	3	5	0	0	0	0	0	0	0	6	0	0
Meta-Protein 1018	BLAST_MALK_THELN Trehalose/maltose import ATP-binding protein MalK OS=Thermococcus litoralis (strain ATCC 51850 / DSM 5473 / JCM 8560 / NS-C) GN=malK PE=1 SV=1_Q9YGA6	3D-structure;ATP-binding;Cell membrane;Complete proteome;Hydrolase;Magnesium;Membrane;Metal-binding;Nucleotide-binding;Reference proteome;Sugar transport;Transport;	;3.6.3.19;	K10112;	Unknown SUPERKINGDOM	Unknown KINGDOM	Unknown PHYLUM	Unknown CLASS	Unknown ORDER	Unknown FAMILY	Unknown GENUS	Unknown SPECIES	Unknown SUBSPECIES	4	3	4	3	4	4	5	6	6	5	1	4	3	4	3	4	5	3	3	5	0	7	4	0	2	7	4	0	2	4	3	3	4	2	4	0
Meta-Protein 1019	BLAST_POTA_MYCPN Spermidine/putrescine import ATP-binding protein PotA OS=Mycoplasma pneumoniae (strain ATCC 29342 / M129) GN=potA PE=3 SV=1_P75059	ATP-binding;Cell membrane;Complete proteome;Hydrolase;Membrane;Nucleotide-binding;Reference proteome;Transport;	3.6.3.31;	K11072;	Unknown SUPERKINGDOM	Unknown KINGDOM	Unknown PHYLUM	Unknown CLASS	Unknown ORDER	Unknown FAMILY	Unknown GENUS	Unknown SPECIES	Unknown SUBSPECIES	4	3	4	2	5	3	5	5	6	2	1	4	3	6	2	3	5	3	3	5	0	7	4	0	2	6	4	0	2	5	3	3	4	2	4	0
Meta-Protein 1211	RL7_BIFLS 50S ribosomal protein L7/L12 OS=Bifidobacterium longum subsp. infantis (strain ATCC 15697 / DSM 20088 / JCM 1222 / NCTC 11817 / S12) GN=rplL PE=3 SV=1	Complete proteome;Reference proteome;Ribonucleoprotein;Ribosomal protein;	;	K02935;	Unknown SUPERKINGDOM	Unknown KINGDOM	Unknown PHYLUM	Unknown CLASS	Unknown ORDER	Unknown FAMILY	Unknown GENUS	Unknown SPECIES	Unknown SUBSPECIES	3	7	14	6	22	7	30	4	15	5	0	0	7	7	0	0	0	0	0	2	0	0	8	0	0	8	8	6	0	0	10	2	11	9	6	0
Meta-Protein 21371	BLAST_AB29B_ARATH ABC transporter B family member 29, chloroplastic OS=Arabidopsis thaliana GN=ABCB29 PE=1 SV=1_Q9LZB8	ATP-binding;Chloroplast;Complete proteome;Membrane;Nucleotide-binding;Plastid;Reference proteome;Transit peptide;Transmembrane;Transmembrane helix;Transport;	;	K02021;	Eukaryota	Viridiplantae	Streptophyta	Unknown CLASS	Brassicales	Brassicaceae	Arabidopsis	Arabidopsis thaliana	Unknown SUBSPECIES	9	4	4	0	12	5	5	3	1	4	2	6	0	3	1	3	0	0	2	1	30	0	0	0	9	1	3	5	30	0	5	0	3	3	0	4
Meta-Protein 1275	PHAE_PHAVU Erythroagglutinating phytohemagglutinin OS=Phaseolus vulgaris GN=DLEC1 PE=1 SV=1	3D-structure;Glycoprotein;Lectin;Mannose-binding;Plant defense;Signal;Toxin;	;	;	Eukaryota	Viridiplantae	Streptophyta	Unknown CLASS	Fabales	Fabaceae	Phaseolus	Phaseolus vulgaris	Unknown SUBSPECIES	0	0	0	0	0	0	0	0	0	0	0	0	0	0	0	0	0	0	0	0	0	0	0	0	0	0	0	0	0	0	0	0	0	19	0	0
Meta-Protein 1749	Metagenome unknown				Unknown SUPERKINGDOM	Unknown KINGDOM	Unknown PHYLUM	Unknown CLASS	Unknown ORDER	Unknown FAMILY	Unknown GENUS	Unknown SPECIES	Unknown SUBSPECIES	0	0	50	0	0	0	0	0	0	0	0	0	0	0	0	1	0	0	0	0	0	0	0	0	0	0	0	0	0	0	0	0	0	120	0	0
Meta-Protein 1073	BLAST_PGCA_BACSU Phosphoglucomutase OS=Bacillus subtilis (strain 168) GN=pgcA PE=1 SV=3_P18159	Carbohydrate metabolism;Complete proteome;Glucose metabolism;Isomerase;Magnesium;Metal-binding;Phosphoprotein;Reference proteome;	5.4.2.10;5.4.2.2;5.4.2.8;	;K01835;K03431;	Unknown SUPERKINGDOM	Unknown KINGDOM	Unknown PHYLUM	Unknown CLASS	Unknown ORDER	Unknown FAMILY	Unknown GENUS	Unknown SPECIES	Unknown SUBSPECIES	10	9	5	0	0	5	2	1	5	1	0	2	0	0	0	1	0	2	1	3	0	5	1	3	0	12	0	0	0	5	0	1	2	10	4	0
Meta-Protein 1121	BLAST_AMY1_ECOLI Periplasmic alpha-amylase OS=Escherichia coli (strain K12) GN=malS PE=1 SV=1_P25718	Calcium;Carbohydrate metabolism;Complete proteome;Direct protein sequencing;Disulfide bond;Glycosidase;Hydrolase;Metal-binding;Periplasm;Reference proteome;Signal;	3.2.1.1;3.2.1.133;	;K01176;	Unknown SUPERKINGDOM	Unknown KINGDOM	Unknown PHYLUM	Unknown CLASS	Unknown ORDER	Unknown FAMILY	Unknown GENUS	Unknown SPECIES	Unknown SUBSPECIES	0	5	0	0	8	8	0	0	6	0	0	0	2	6	0	0	0	0	0	0	0	9	0	0	0	0	9	0	0	4	0	0	0	27	0	0
Meta-Protein 1145	BLAST_MAO4_BACSU Probable NAD-dependent malic enzyme 4 OS=Bacillus subtilis (strain 168) GN=ytsJ PE=3 SV=1_O34962	Complete proteome;Metal-binding;NAD;Oxidoreductase;Reference proteome;	1.1.1.38;	;K00027;	Unknown SUPERKINGDOM	Unknown KINGDOM	Unknown PHYLUM	Unknown CLASS	Unknown ORDER	Unknown FAMILY	Unknown GENUS	Unknown SPECIES	Unknown SUBSPECIES	5	3	7	0	0	5	9	2	11	0	0	2	5	6	0	0	1	0	0	4	0	3	8	1	2	5	3	2	1	0	0	0	0	0	1	0
Meta-Protein 17115	BLAST_TRPE_BACCA Anthranilate synthase component 1 OS=Bacillus caldotenax GN=trpE PE=3 SV=1_P30526	Amino-acid biosynthesis;Aromatic amino acid biosynthesis;Lyase;Magnesium;Metal-binding;Tryptophan biosynthesis;	4.1.3.27;	;	Bacteria	Unknown KINGDOM	Firmicutes	Bacilli	Bacillales	Bacillaceae	Bacillus	Bacillus caldotenax	Unknown SUBSPECIES	6	4	0	5	7	4	0	6	0	0	0	0	1	0	0	0	0	0	0	2	8	0	5	0	7	1	4	7	8	4	6	7	6	7	4	4
Meta-Protein 272	BLAST_PA2GA_HUMAN Phospholipase A2, membrane associated OS=Homo sapiens GN=PLA2G2A PE=1 SV=2_P14555	3D-structure;Calcium;Cell membrane;Complete proteome;Direct protein sequencing;Disulfide bond;Hydrolase;Lipid degradation;Lipid metabolism;Membrane;Metal-binding;Polymorphism;Reference proteome;Secreted;Signal;	3.1.1.4;	K01047;	Eukaryota	Metazoa	Chordata	Mammalia	Primates	Hominidae	Homo	Homo sapiens	Unknown SUBSPECIES	2	10	0	0	5	1	3	2	0	0	0	1	0	0	1	0	2	4	8	0	9	7	0	6	22	5	0	11	2	0	0	0	8	14	0	0
Meta-Protein 24256	Metagenome unknown				Unknown SUPERKINGDOM	Unknown KINGDOM	Unknown PHYLUM	Unknown CLASS	Unknown ORDER	Unknown FAMILY	Unknown GENUS	Unknown SPECIES	Unknown SUBSPECIES	0	0	0	0	0	0	0	0	0	0	0	0	0	0	0	0	0	0	0	0	19	0	4	15	6	0	6	9	10	27	2	1	2	0	0	0
Meta-Protein 517	BLAST_FUMA_ECOLI Fumarate hydratase class I, aerobic OS=Escherichia coli (strain K12) GN=fumA PE=1 SV=2_P0AC33	4Fe-4S;Complete proteome;Direct protein sequencing;Iron;Iron-sulfur;Isomerase;Lyase;Metal-binding;Reference proteome;Tricarboxylic acid cycle;	4.2.1.2;5.3.2.2;	K01676;	Unknown SUPERKINGDOM	Unknown KINGDOM	Unknown PHYLUM	Unknown CLASS	Unknown ORDER	Unknown FAMILY	Unknown GENUS	Unknown SPECIES	Unknown SUBSPECIES	0	0	0	0	0	5	0	0	2	0	0	0	1	0	0	0	0	2	0	0	1	79	1	3	2	0	0	0	0	0	0	0	2	5	1	0
Meta-Protein 446	TNNC2_MOUSE Troponin C, skeletal muscle OS=Mus musculus GN=Tnnc2 PE=1 SV=2	3D-structure;Acetylation;Calcium;Complete proteome;Direct protein sequencing;Metal-binding;Muscle protein;Reference proteome;Repeat;	;	;K12042;	Unknown SUPERKINGDOM	Unknown KINGDOM	Unknown PHYLUM	Unknown CLASS	Unknown ORDER	Unknown FAMILY	Unknown GENUS	Unknown SPECIES	Unknown SUBSPECIES	0	2	27	1	0	3	0	0	4	0	0	0	1	2	0	0	0	0	0	0	0	2	0	0	0	9	9	7	8	2	5	0	0	0	0	0
Meta-Protein 177	BLAST_ADH1_CLOSA NADPH-dependent butanol dehydrogenase OS=Clostridium saccharobutylicum GN=adh1 PE=3 SV=1_P13604	ATP-binding;Cell inner membrane;Cell membrane;Complete proteome;Hydrolase;Membrane;NADP;Nucleotide-binding;Oxidoreductase;Reference proteome;Repeat;Sugar transport;Transport;	1.1.1.-;3.6.3.17;	;K10441;	Unknown SUPERKINGDOM	Unknown KINGDOM	Unknown PHYLUM	Unknown CLASS	Unknown ORDER	Unknown FAMILY	Unknown GENUS	Unknown SPECIES	Unknown SUBSPECIES	1	4	7	0	0	9	1	16	20	10	0	9	6	3	0	0	2	0	0	12	0	2	0	1	0	8	6	0	0	0	0	1	0	17	0	0
Meta-Protein 975	BLAST_NAGH_CLOPE Hyaluronoglucosaminidase OS=Clostridium perfringens (strain 13 / Type A) GN=nagH PE=1 SV=2_P26831	3D-structure;Complete proteome;Glycosidase;Hydrolase;Reference proteome;Secreted;Signal;Toxin;Virulence;	3.2.1.35;	K01197;	Unknown SUPERKINGDOM	Unknown KINGDOM	Unknown PHYLUM	Unknown CLASS	Unknown ORDER	Unknown FAMILY	Unknown GENUS	Unknown SPECIES	Unknown SUBSPECIES	10	5	2	1	13	4	6	2	4	2	2	2	0	2	1	1	0	0	2	0	21	2	14	0	9	2	1	2	26	0	3	3	2	4	0	1
Meta-Protein 343	Metagenome unknown	3D-structure;Cobalamin biosynthesis;Cobalt;Complete proteome;Direct protein sequencing;Heme;Iron;Lyase;Metal-binding;Periplasm;Porphyrin biosynthesis;Reference proteome;Signal;	4.99.1.3;4.99.1.4;	K02190;	Unknown SUPERKINGDOM	Unknown KINGDOM	Unknown PHYLUM	Unknown CLASS	Unknown ORDER	Unknown FAMILY	Unknown GENUS	Unknown SPECIES	Unknown SUBSPECIES	6	2	1	0	0	0	0	0	65	5	1	4	0	0	0	0	9	0	0	5	0	1	3	0	0	4	0	0	0	7	0	4	1	1	1	0
Meta-Protein 359	BLAST_RS16_SALRD 30S ribosomal protein S16 OS=Salinibacter ruber (strain DSM 13855 / M31) GN=rpsP PE=3 SV=1_Q2S232	Complete proteome;Reference proteome;Ribonucleoprotein;Ribosomal protein;	;	K02959;	Unknown SUPERKINGDOM	Unknown KINGDOM	Unknown PHYLUM	Unknown CLASS	Unknown ORDER	Unknown FAMILY	Unknown GENUS	Unknown SPECIES	Unknown SUBSPECIES	0	6	3	0	4	10	12	0	0	0	0	0	0	3	4	5	0	14	3	0	0	19	2	9	4	0	0	4	0	0	0	0	0	4	0	10
Meta-Protein 13279	Metagenome unknown				Unknown SUPERKINGDOM	Unknown KINGDOM	Unknown PHYLUM	Unknown CLASS	Unknown ORDER	Unknown FAMILY	Unknown GENUS	Unknown SPECIES	Unknown SUBSPECIES	4	3	3	2	2	4	4	2	2	3	2	3	0	3	1	3	0	3	1	4	8	5	6	3	5	1	4	5	5	6	4	1	5	0	5	4
Meta-Protein 497	BLAST_UXAB_BACV8 Altronate oxidoreductase OS=Bacteroides vulgatus (strain ATCC 8482 / DSM 1447 / JCM 5826 / NBRC 14291 / NCTC 11154) GN=uxaB PE=3 SV=1_A6L4U5	Complete proteome;Direct protein sequencing;NAD;Oxidoreductase;Reference proteome;	1.1.1.58;	K00041;	Unknown SUPERKINGDOM	Unknown KINGDOM	Unknown PHYLUM	Unknown CLASS	Unknown ORDER	Unknown FAMILY	Unknown GENUS	Unknown SPECIES	Unknown SUBSPECIES	4	6	0	0	2	7	13	0	0	0	0	0	0	0	1	0	1	2	0	2	1	30	0	0	0	0	1	2	0	0	0	0	0	29	22	7
Meta-Protein 460	BLAST_RPOC_LACP7 DNA-directed RNA polymerase subunit beta OS=Lachnoclostridium phytofermentans (strain ATCC 700394 / DSM 18823 / ISDg) GN=rpoC PE=3 SV=1_A9KJL3	Complete proteome;DNA-directed RNA polymerase;Nucleotidyltransferase;Reference proteome;Transcription;Transferase;	2.7.7.6;	K03046;	Unknown SUPERKINGDOM	Unknown KINGDOM	Unknown PHYLUM	Unknown CLASS	Unknown ORDER	Unknown FAMILY	Unknown GENUS	Unknown SPECIES	Unknown SUBSPECIES	6	5	0	1	6	9	1	11	8	8	0	6	4	3	0	4	6	4	0	5	0	3	5	0	0	10	0	0	0	0	0	0	0	5	9	2
Meta-Protein 2525	Metagenome unknown				Unknown SUPERKINGDOM	Unknown KINGDOM	Unknown PHYLUM	Unknown CLASS	Unknown ORDER	Unknown FAMILY	Unknown GENUS	Unknown SPECIES	Unknown SUBSPECIES	0	32	0	0	5	52	1	24	4	25	0	0	27	0	0	0	0	0	0	0	0	0	0	5	0	0	0	0	0	0	0	0	0	0	0	0
Meta-Protein 407	BLAST_OMPA_BUCAI OmpA-like protein OS=Buchnera aphidicola subsp. Acyrthosiphon pisum (strain APS) GN=ompA PE=3 SV=1_P57414	3D-structure;Cell membrane;Cell outer membrane;Cell shape;Cell wall;Complete proteome;Conjugation;Direct protein sequencing;Disulfide bond;Ion transport;Membrane;Metal-binding;Porin;Pyrrolidone carboxylic acid;Reference proteome;Repeat;Secreted;Signal;Transmembrane;Transmembrane beta strand;Transmembrane helix;Transport;Zinc;	;	;K03286;K16191;	Unknown SUPERKINGDOM	Unknown KINGDOM	Unknown PHYLUM	Unknown CLASS	Unknown ORDER	Unknown FAMILY	Unknown GENUS	Unknown SPECIES	Unknown SUBSPECIES	0	3	1	0	2	12	3	0	0	0	0	0	0	17	0	1	0	5	1	0	0	39	0	4	0	0	0	2	4	3	0	2	5	0	3	0
Meta-Protein 474	BLAST_ANXA4_CANLF Annexin A4 OS=Canis lupus familiaris GN=ANXA4 PE=1 SV=2_P50994	3D-structure;Acetylation;Alternative splicing;Annexin;Calcium;Calcium/phospholipid-binding;Complete proteome;Direct protein sequencing;Phosphoprotein;Polymorphism;Reference proteome;Repeat;	;	;K17093;	Unknown SUPERKINGDOM	Unknown KINGDOM	Unknown PHYLUM	Unknown CLASS	Unknown ORDER	Unknown FAMILY	Unknown GENUS	Unknown SPECIES	Unknown SUBSPECIES	8	0	0	0	0	0	0	0	0	0	0	0	0	1	0	0	0	0	0	0	14	2	4	37	12	2	6	46	0	0	16	0	0	0	0	2
Meta-Protein 13857	LEU1_STAAT 2-isopropylmalate synthase OS=Staphylococcus aureus (strain USA300 / TCH1516) GN=leuA PE=3 SV=1	Amino-acid biosynthesis;Branched-chain amino acid biosynthesis;Leucine biosynthesis;Transferase;	2.3.3.13;	K01649;	Bacteria	Unknown KINGDOM	Firmicutes	Bacilli	Bacillales	Staphylococcaceae	Staphylococcus	Staphylococcus aureus subsp. aureus USA300_TCH1516	Staphylococcus aureus subsp. aureus	4	3	4	3	3	3	4	3	4	4	1	5	2	3	4	2	3	2	4	5	0	1	7	3	5	5	3	4	5	6	0	3	6	6	4	3
Meta-Protein 13276	BLAST_LSTP_STASI Lysostaphin OS=Staphylococcus simulans GN=lss PE=1 SV=2_P10547	3D-structure;Cell wall biogenesis/degradation;Hydrolase;Metal-binding;Metalloprotease;Protease;Repeat;Secreted;Signal;Zinc;Zymogen;	3.4.24.75;	;K08259;	Bacteria	Unknown KINGDOM	Firmicutes	Bacilli	Bacillales	Staphylococcaceae	Staphylococcus	Staphylococcus simulans	Unknown SUBSPECIES	5	4	4	3	4	3	5	3	3	4	2	3	0	2	1	3	1	2	0	4	7	3	5	1	2	3	4	7	5	3	4	2	4	0	4	4
Meta-Protein 17931	ASP_THECC 21 kDa seed protein OS=Theobroma cacao GN=ASP PE=2 SV=1	Disulfide bond;Signal;	;	;	Eukaryota	Viridiplantae	Streptophyta	Unknown CLASS	Malvales	Malvaceae	Theobroma	Theobroma cacao	Unknown SUBSPECIES	0	0	6	0	4	0	5	0	0	0	2	0	0	0	2	0	0	0	0	0	7	0	7	0	0	0	0	0	0	0	9	0	0	0	14	0
Meta-Protein 13856	BLAST_LTRB_LACLC Group II intron-interrupted relaxase LtrB OS=Lactococcus lactis subsp. cremoris GN=ltrBE1 PE=3 SV=2_Q48722	Complete proteome;Conjugation;Magnesium;Manganese;Metal-binding;Mobility protein;Plasmid;	;	;	Bacteria	Unknown KINGDOM	Firmicutes	Bacilli	Lactobacillales	Streptococcaceae	Lactococcus	Lactococcus lactis	Lactococcus lactis subsp. cremoris	4	4	4	3	3	3	4	3	4	4	1	5	2	3	4	2	5	1	3	5	0	0	7	3	5	5	3	3	5	6	0	3	6	6	4	3
Meta-Protein 24000	Metagenome unknown				Unknown SUPERKINGDOM	Unknown KINGDOM	Unknown PHYLUM	Unknown CLASS	Unknown ORDER	Unknown FAMILY	Unknown GENUS	Unknown SPECIES	Unknown SUBSPECIES	2	0	0	4	7	1	2	2	2	3	2	0	1	0	0	1	0	0	1	2	11	6	5	5	5	0	3	12	8	1	6	5	2	1	4	3
Meta-Protein 274	BLAST_PGK_CLONN Phosphoglycerate kinase OS=Clostridium novyi (strain NT) GN=pgk PE=3 SV=1_A0PYP1	ATP-binding;Complete proteome;Cytoplasm;Glycolysis;Kinase;Nucleotide-binding;Reference proteome;Transferase;	2.7.2.3;	K00927;	Unknown SUPERKINGDOM	Unknown KINGDOM	Unknown PHYLUM	Unknown CLASS	Unknown ORDER	Unknown FAMILY	Unknown GENUS	Unknown SPECIES	Unknown SUBSPECIES	0	0	0	1	0	4	0	2	41	14	0	9	4	5	0	0	0	0	0	10	0	0	0	0	0	38	0	0	0	0	0	0	0	0	0	0
Meta-Protein 14232	BLAST_Y6031_MYCS2 Putative short-chain type dehydrogenase/reductase MSMEG_6031/MSMEI_5872 OS=Mycobacterium smegmatis (strain ATCC 700084 / mc(2)155) GN=MSMEG_6031 PE=1 SV=1_A0R518	Complete proteome;Isopeptide bond;NAD;Oxidoreductase;Reference proteome;Ubl conjugation;	1.1.1.-;	;	Bacteria	Unknown KINGDOM	Actinobacteria	Actinobacteria	Actinomycetales	Mycobacteriaceae	Mycobacterium	Mycobacterium smegmatis	Mycobacterium smegmatis str. MC2 155	0	1	1	4	0	4	4	3	0	4	2	5	4	0	1	1	4	0	1	6	0	0	6	4	0	5	5	2	0	3	0	5	3	5	9	0
Meta-Protein 1899	BLAST_RS8_CARHZ 30S ribosomal protein S8 OS=Carboxydothermus hydrogenoformans (strain ATCC BAA-161 / DSM 6008 / Z-2901) GN=rpsH PE=3 SV=1_Q3A9T0	Complete proteome;RNA-binding;Reference proteome;Ribonucleoprotein;Ribosomal protein;rRNA-binding;	;	K02994;	Bacteria	Unknown KINGDOM	Unknown PHYLUM	Unknown CLASS	Unknown ORDER	Unknown FAMILY	Unknown GENUS	Unknown SPECIES	Unknown SUBSPECIES	6	3	1	4	4	2	3	1	3	1	2	3	3	1	1	2	1	0	1	3	1	2	12	2	9	8	4	7	5	5	0	0	6	1	5	1
Meta-Protein 548	BLAST_MGGB_PETMO Mannosylglucosyl-3-phosphoglycerate phosphatase OS=Petrotoga mobilis (strain DSM 10674 / SJ95) GN=mggB PE=1 SV=1_A9BJC1	3D-structure;Alternative splicing;Cell membrane;Cell outer membrane;Complete proteome;Direct protein sequencing;Disease mutation;Disulfide bond;GPI-anchor;Glycoprotein;Hydrolase;Lipoprotein;Magnesium;Membrane;Metal-binding;Nucleotide-binding;Palmitate;Periplasm;Polymorphism;Reference proteome;Signal;Zinc;	3.1.3.-;3.1.3.5;	K11751;K19970;	Unknown SUPERKINGDOM	Unknown KINGDOM	Unknown PHYLUM	Unknown CLASS	Unknown ORDER	Unknown FAMILY	Unknown GENUS	Unknown SPECIES	Unknown SUBSPECIES	0	0	9	0	0	8	5	5	8	1	0	0	1	0	0	3	2	0	0	0	0	2	0	3	0	5	0	0	0	0	0	10	0	16	6	0
Meta-Protein 13933	PUMA_PARUN 227 kDa spindle- and centromere-associated protein OS=Parascaris univalens GN=PUMA1 PE=2 SV=1	Cell cycle;Cell division;Centromere;Chromosome;Coiled coil;Cytoplasm;Cytoskeleton;Kinetochore;Meiosis;Mitosis;	;	;	Eukaryota	Metazoa	Nematoda	Chromadorea	Ascaridida	Ascarididae	Parascaris	Parascaris univalens	Unknown SUBSPECIES	6	2	0	9	5	1	6	3	0	2	0	3	11	10	1	0	2	0	0	1	0	1	1	1	9	0	9	5	5	5	4	5	5	1	5	8
Meta-Protein 1676	BLAST_CAT1_CLOK5 Succinyl-CoA:coenzyme A transferase OS=Clostridium kluyveri (strain ATCC 8527 / DSM 555 / NCIMB 10680) GN=cat1 PE=2 SV=1_P38946	Complete proteome;Reference proteome;Transferase;	2.8.3.-;	K18118;	Bacteria	Unknown KINGDOM	Firmicutes	Clostridia	Clostridiales	Clostridiaceae	Clostridium	Clostridium kluyveri	Clostridium kluyveri DSM 555	1	20	2	0	0	0	67	0	0	0	0	0	0	0	0	0	0	0	0	0	0	0	0	0	0	9	0	0	0	10	0	0	0	0	0	0
Meta-Protein 24587	EFTU_RECAM Elongation factor Tu, mitochondrial OS=Reclinomonas americana GN=TUFA PE=3 SV=1	Elongation factor;GTP-binding;Mitochondrion;Nucleotide-binding;Protein biosynthesis;	;	;	Eukaryota	Unknown KINGDOM	Unknown PHYLUM	Unknown CLASS	Unknown ORDER	Histionidae	Reclinomonas	Reclinomonas americana	Unknown SUBSPECIES	0	5	7	0	0	3	0	4	0	3	0	4	0	0	0	0	0	0	0	0	0	12	6	3	4	11	5	5	10	0	0	0	1	4	0	0
Meta-Protein 2987	PDC6_YEAST Pyruvate decarboxylase isozyme 3 OS=Saccharomyces cerevisiae (strain ATCC 204508 / S288c) GN=PDC6 PE=1 SV=3	3D-structure;Acetylation;Allosteric enzyme;Branched-chain amino acid catabolism;Complete proteome;Cytoplasm;Decarboxylase;Direct protein sequencing;Isopeptide bond;Lyase;Magnesium;Metal-binding;Nucleus;Phenylalanine catabolism;Phosphoprotein;Reference proteome;Thiamine pyrophosphate;Tryptophan catabolism;Ubl conjugation;	4.1.1.-;4.1.1.1;4.1.1.43;4.1.1.72;4.1.1.74;	;K01568;	Unknown SUPERKINGDOM	Unknown KINGDOM	Unknown PHYLUM	Unknown CLASS	Unknown ORDER	Unknown FAMILY	Unknown GENUS	Unknown SPECIES	Unknown SUBSPECIES	0	0	0	0	0	0	0	0	0	2	0	0	0	0	0	0	0	1	0	0	0	1	0	0	0	0	0	0	0	0	49	0	32	0	4	4
Meta-Protein 32565	BLAST_RL17_EUBE2 50S ribosomal protein L17 OS=Eubacterium eligens (strain ATCC 27750 / VPI C15-48) GN=rplQ PE=3 SV=1_C4Z2V8	Complete proteome;Reference proteome;Ribonucleoprotein;Ribosomal protein;	;	K02879;	Bacteria	Unknown KINGDOM	Firmicutes	Clostridia	Clostridiales	Eubacteriaceae	Eubacterium	Eubacterium eligens	Eubacterium eligens ATCC 27750	3	4	0	9	3	1	2	1	0	3	3	9	5	3	0	0	0	0	0	0	0	0	5	0	9	3	4	6	0	2	4	6	0	2	6	6
Meta-Protein 118	BLAST_RL4_EUBE2 50S ribosomal protein L4 OS=Eubacterium eligens (strain ATCC 27750 / VPI C15-48) GN=rplD PE=3 SV=1_C4Z2T1	Complete proteome;RNA-binding;Reference proteome;Ribonucleoprotein;Ribosomal protein;rRNA-binding;	;	K02926;	Bacteria	Unknown KINGDOM	Firmicutes	Clostridia	Unknown ORDER	Unknown FAMILY	Unknown GENUS	Unknown SPECIES	Unknown SUBSPECIES	4	12	8	2	1	18	8	12	21	7	0	7	2	9	0	1	10	3	0	0	0	0	0	2	0	5	0	0	0	0	0	12	0	17	5	0
Meta-Protein 545	BLAST_RHAA_BACTN L-rhamnose isomerase OS=Bacteroides thetaiotaomicron (strain ATCC 29148 / DSM 2079 / NCTC 10582 / E50 / VPI-5482) GN=rhaA PE=3 SV=1_Q8A1A2	Complete proteome;Cytoplasm;Isomerase;Manganese;Metal-binding;Reference proteome;Rhamnose metabolism;	5.3.1.14;	K01813;	Unknown SUPERKINGDOM	Unknown KINGDOM	Unknown PHYLUM	Unknown CLASS	Unknown ORDER	Unknown FAMILY	Unknown GENUS	Unknown SPECIES	Unknown SUBSPECIES	0	1	1	5	1	4	0	0	0	0	1	0	0	0	0	5	0	1	4	2	1	2	0	0	4	1	0	0	0	11	1	0	0	19	4	1
Meta-Protein 15356	Metagenome unknown				Unknown SUPERKINGDOM	Unknown KINGDOM	Unknown PHYLUM	Unknown CLASS	Unknown ORDER	Unknown FAMILY	Unknown GENUS	Unknown SPECIES	Unknown SUBSPECIES	5	3	1	4	1	2	1	2	1	1	0	2	1	0	0	1	1	0	2	1	3	2	2	11	5	2	8	6	5	3	2	7	5	2	5	3
Meta-Protein 17448	BLAST_APPY_ECOLI HTH-type transcriptional regulator AppY OS=Escherichia coli (strain K12) GN=appY PE=1 SV=3_P05052	Complete proteome;DNA-binding;Reference proteome;Repressor;Transcription;Transcription regulation;	;	K07780;	Bacteria	Unknown KINGDOM	Proteobacteria	Gammaproteobacteria	Enterobacteriales	Enterobacteriaceae	Escherichia	Escherichia coli	Escherichia coli K-12	1	0	0	3	6	2	2	3	1	3	2	2	1	0	1	1	0	0	1	2	10	5	4	4	5	0	3	9	9	1	2	6	3	2	4	2
Meta-Protein 39640	Metagenome unknown				Unknown SUPERKINGDOM	Unknown KINGDOM	Unknown PHYLUM	Unknown CLASS	Unknown ORDER	Unknown FAMILY	Unknown GENUS	Unknown SPECIES	Unknown SUBSPECIES	4	0	0	0	3	3	2	0	0	1	0	0	0	0	0	0	0	0	0	4	20	0	9	0	14	0	6	8	8	7	2	4	7	2	0	0
Meta-Protein 14962	Metagenome unknown				Unknown SUPERKINGDOM	Unknown KINGDOM	Unknown PHYLUM	Unknown CLASS	Unknown ORDER	Unknown FAMILY	Unknown GENUS	Unknown SPECIES	Unknown SUBSPECIES	4	2	1	4	7	2	2	2	0	2	3	3	4	1	1	0	3	0	1	0	20	2	1	3	7	3	6	6	6	1	0	5	8	1	3	6
Meta-Protein 17203	BLAST_SYK_BACTN Lysine--tRNA ligase OS=Bacteroides thetaiotaomicron (strain ATCC 29148 / DSM 2079 / NCTC 10582 / E50 / VPI-5482) GN=lysS PE=3 SV=1_Q8A5W4	ATP-binding;Aminoacyl-tRNA synthetase;Complete proteome;Cytoplasm;Ligase;Magnesium;Metal-binding;Nucleotide-binding;Protein biosynthesis;Reference proteome;	6.1.1.6;	K04567;	Bacteria	Unknown KINGDOM	Bacteroidetes	Bacteroidia	Bacteroidales	Unknown FAMILY	Unknown GENUS	Unknown SPECIES	Unknown SUBSPECIES	7	1	0	5	5	0	4	0	2	1	0	3	5	1	0	0	3	1	0	2	14	0	1	2	2	0	0	9	6	8	4	6	3	3	6	1
Meta-Protein 562	BLAST_MUTB_PORGI Methylmalonyl-CoA mutase large subunit OS=Porphyromonas gingivalis (strain ATCC BAA-308 / W83) GN=mutB PE=3 SV=1_Q59677	Cobalamin;Cobalt;Complete proteome;Isomerase;Metal-binding;Mitochondrion;Reference proteome;Transit peptide;	5.4.99.2;	;K01847;	Unknown SUPERKINGDOM	Unknown KINGDOM	Unknown PHYLUM	Unknown CLASS	Unknown ORDER	Unknown FAMILY	Unknown GENUS	Unknown SPECIES	Unknown SUBSPECIES	0	12	3	0	0	0	8	3	0	0	0	3	0	2	0	0	0	22	2	0	0	28	2	0	5	3	0	0	0	4	0	0	0	5	0	0
Meta-Protein 730	BLAST_RS8_LACP7 30S ribosomal protein S8 OS=Lachnoclostridium phytofermentans (strain ATCC 700394 / DSM 18823 / ISDg) GN=rpsH PE=3 SV=1_A9KJI0	Complete proteome;RNA-binding;Reference proteome;Ribonucleoprotein;Ribosomal protein;rRNA-binding;	;	K02994;	Unknown SUPERKINGDOM	Unknown KINGDOM	Unknown PHYLUM	Unknown CLASS	Unknown ORDER	Unknown FAMILY	Unknown GENUS	Unknown SPECIES	Unknown SUBSPECIES	3	6	3	3	0	7	4	4	10	1	3	8	4	2	1	0	0	0	0	2	0	0	3	0	3	3	2	0	2	2	0	9	3	4	0	0
Meta-Protein 3203	Metagenome unknown				Unknown SUPERKINGDOM	Unknown KINGDOM	Unknown PHYLUM	Unknown CLASS	Unknown ORDER	Unknown FAMILY	Unknown GENUS	Unknown SPECIES	Unknown SUBSPECIES	0	36	0	0	0	0	0	24	57	0	0	0	0	0	0	0	11	0	0	14	0	0	0	0	0	0	0	0	0	0	0	0	0	53	0	0
Meta-Protein 997	BLAST_RL10_CLOPE 50S ribosomal protein L10 OS=Clostridium perfringens (strain 13 / Type A) GN=rplJ PE=3 SV=1_Q8XHR6	Complete proteome;RNA-binding;Reference proteome;Ribonucleoprotein;Ribosomal protein;rRNA-binding;	;	K02864;	Unknown SUPERKINGDOM	Unknown KINGDOM	Unknown PHYLUM	Unknown CLASS	Unknown ORDER	Unknown FAMILY	Unknown GENUS	Unknown SPECIES	Unknown SUBSPECIES	0	4	1	4	0	0	7	2	8	0	1	10	3	4	2	3	1	2	1	1	0	0	6	0	3	1	0	0	0	7	0	5	2	9	5	0
Meta-Protein 133	SYG_AGARV Glycine--tRNA ligase OS=Agathobacter rectalis (strain ATCC 33656 / DSM 3377 / JCM 17463 / KCTC 5835 / VPI 0990) GN=glyQS PE=3 SV=1	ATP-binding;Aminoacyl-tRNA synthetase;Cell inner membrane;Cell membrane;Complete proteome;Cytoplasm;Ligase;Membrane;Nucleotide-binding;Protein biosynthesis;Protein transport;Reference proteome;Translocation;Transport;	;6.1.1.14;	K01880;K03070;	Unknown SUPERKINGDOM	Unknown KINGDOM	Unknown PHYLUM	Unknown CLASS	Unknown ORDER	Unknown FAMILY	Unknown GENUS	Unknown SPECIES	Unknown SUBSPECIES	5	6	2	0	0	7	1	3	19	8	0	5	1	2	3	0	6	4	4	0	0	2	0	2	0	6	3	0	0	0	2	0	2	7	0	0
Meta-Protein 499	Metagenome unknown				Unknown SUPERKINGDOM	Unknown KINGDOM	Unknown PHYLUM	Unknown CLASS	Unknown ORDER	Unknown FAMILY	Unknown GENUS	Unknown SPECIES	Unknown SUBSPECIES	5	5	0	0	2	6	4	0	5	0	0	2	2	4	0	4	0	0	1	6	0	1	0	4	0	6	4	0	0	0	0	6	2	3	9	0
Meta-Protein 14794	BLAST_HLYA_SERMA Hemolysin OS=Serratia marcescens GN=shlA PE=1 SV=1_P15320	Cell outer membrane;Cytolysis;Direct protein sequencing;Hemolysis;Membrane;Signal;Toxin;	;	;	Bacteria	Unknown KINGDOM	Proteobacteria	Gammaproteobacteria	Enterobacteriales	Enterobacteriaceae	Serratia	Serratia marcescens	Unknown SUBSPECIES	0	6	10	0	1	8	7	7	6	6	0	4	6	2	0	0	2	0	2	3	0	3	0	6	0	3	1	0	0	0	0	6	3	4	6	0
Meta-Protein 521	BLAST_RPOA_BACTN DNA-directed RNA polymerase subunit alpha OS=Bacteroides thetaiotaomicron (strain ATCC 29148 / DSM 2079 / NCTC 10582 / E50 / VPI-5482) GN=rpoA PE=3 SV=1_Q8A4A2	Complete proteome;DNA-directed RNA polymerase;Nucleotidyltransferase;Reference proteome;Transcription;Transferase;	2.7.7.6;	K03040;	Unknown SUPERKINGDOM	Unknown KINGDOM	Unknown PHYLUM	Unknown CLASS	Unknown ORDER	Unknown FAMILY	Unknown GENUS	Unknown SPECIES	Unknown SUBSPECIES	0	1	6	0	0	10	9	1	1	0	0	0	0	0	0	0	0	5	0	3	0	23	4	6	0	2	0	0	0	1	0	0	3	19	4	0
Meta-Protein 14316	BLAST_Y623_METJA Putative metallophosphoesterase MJ0623 OS=Methanocaldococcus jannaschii (strain ATCC 43067 / DSM 2661 / JAL-1 / JCM 10045 / NBRC 100440) GN=MJ0623 PE=3 SV=1_Q58040	Complete proteome;Hydrolase;Reference proteome;	3.1.4.-;	K07095;	Archaea	Unknown KINGDOM	Euryarchaeota	Methanococci	Methanococcales	Methanocaldococcaceae	Methanocaldococcus	Methanocaldococcus jannaschii	Methanocaldococcus jannaschii DSM 2661	8	3	4	5	9	7	7	7	7	7	3	6	4	6	4	5	7	2	1	5	2	3	4	0	2	0	0	3	0	2	3	2	1	4	3	0
Meta-Protein 583	BLAST_RPOB_BACV8 DNA-directed RNA polymerase subunit beta OS=Bacteroides vulgatus (strain ATCC 8482 / DSM 1447 / JCM 5826 / NBRC 14291 / NCTC 11154) GN=rpoB PE=3 SV=1_A6KYK3	Complete proteome;DNA-directed RNA polymerase;Nucleotidyltransferase;Reference proteome;Transcription;Transferase;	2.7.7.6;	K03043;	Unknown SUPERKINGDOM	Unknown KINGDOM	Unknown PHYLUM	Unknown CLASS	Unknown ORDER	Unknown FAMILY	Unknown GENUS	Unknown SPECIES	Unknown SUBSPECIES	0	4	6	0	0	4	4	8	0	4	0	4	0	0	0	0	2	0	0	4	0	19	2	4	6	6	0	0	0	0	0	0	0	19	0	0
Meta-Protein 19095	TOP2_PICGU DNA topoisomerase 2 OS=Meyerozyma guilliermondii (strain ATCC 6260 / CBS 566 / DSM 6381 / JCM 1539 / NBRC 10279 / NRRL Y-324) GN=TOP2 PE=3 SV=3	ATP-binding;Complete proteome;DNA-binding;Isomerase;Magnesium;Metal-binding;Nucleotide-binding;Nucleus;Phosphoprotein;Reference proteome;Topoisomerase;	5.99.1.3;	K03164;	Eukaryota	Fungi	Ascomycota	Saccharomycetes	Saccharomycetales	Debaryomycetaceae	Meyerozyma	Meyerozyma guilliermondii	Meyerozyma guilliermondii ATCC 6260	4	5	4	0	4	4	5	4	6	3	4	4	0	4	2	3	3	2	4	3	3	4	0	4	4	3	4	4	5	3	5	0	4	0	0	4
Meta-Protein 211	BLAST_RL21_BACV8 50S ribosomal protein L21 OS=Bacteroides vulgatus (strain ATCC 8482 / DSM 1447 / JCM 5826 / NBRC 14291 / NCTC 11154) GN=rplU PE=3 SV=1_A6L6D1	Complete proteome;RNA-binding;Reference proteome;Ribonucleoprotein;Ribosomal protein;rRNA-binding;	;	K02888;	Unknown SUPERKINGDOM	Unknown KINGDOM	Unknown PHYLUM	Unknown CLASS	Unknown ORDER	Unknown FAMILY	Unknown GENUS	Unknown SPECIES	Unknown SUBSPECIES	0	4	0	0	0	0	0	0	2	0	0	0	0	0	4	8	2	1	5	0	0	0	4	2	8	2	6	8	21	0	0	0	14	12	0	15
Meta-Protein 1229	BLAST_FLA_CLOTY Flagellin (Fragment) OS=Clostridium tyrobutyricum GN=fla PE=1 SV=2_P80583	Bacterial flagellum;Complete proteome;Direct protein sequencing;Secreted;	;	;K02406;	Bacteria	Unknown KINGDOM	Unknown PHYLUM	Unknown CLASS	Unknown ORDER	Unknown FAMILY	Unknown GENUS	Unknown SPECIES	Unknown SUBSPECIES	0	17	12	0	8	8	0	0	10	0	0	19	0	0	0	0	0	0	1	4	0	0	0	9	0	23	0	0	0	0	0	0	2	13	0	0
Meta-Protein 3006	ACTN2_MOUSE Alpha-actinin-2 OS=Mus musculus GN=Actn2 PE=1 SV=2	3D-structure;Acetylation;Actin-binding;Allergen;Alternative splicing;Calcium;Cardiomyopathy;Cell junction;Cell membrane;Cell projection;Complete proteome;Cytoplasm;Cytoskeleton;Direct protein sequencing;Disease mutation;Membrane;Metal-binding;Nucleus;Phosphoprotein;Polymorphism;Protein transport;Reference proteome;Repeat;Transport;Ubl conjugation;	;	;K05699;K21073;	Unknown SUPERKINGDOM	Unknown KINGDOM	Unknown PHYLUM	Unknown CLASS	Unknown ORDER	Unknown FAMILY	Unknown GENUS	Unknown SPECIES	Unknown SUBSPECIES	0	1	1	0	0	0	0	0	2	0	0	0	0	0	3	0	0	0	0	0	0	4	0	28	0	2	1	4	0	4	2	2	0	2	0	0
Meta-Protein 43470	Metagenome unknown				Unknown SUPERKINGDOM	Unknown KINGDOM	Unknown PHYLUM	Unknown CLASS	Unknown ORDER	Unknown FAMILY	Unknown GENUS	Unknown SPECIES	Unknown SUBSPECIES	0	0	0	4	0	0	1	1	1	0	0	0	0	0	0	0	0	0	1	1	6	0	6	3	5	0	8	12	3	2	0	0	5	0	4	8
Meta-Protein 552	BLAST_UPP_CLONN Uracil phosphoribosyltransferase OS=Clostridium novyi (strain NT) GN=upp PE=3 SV=1_A0Q306	Allosteric enzyme;Complete proteome;GTP-binding;Glycosyltransferase;Magnesium;Nucleotide-binding;Reference proteome;Transferase;	2.4.2.9;	K00761;	Bacteria	Unknown KINGDOM	Firmicutes	Unknown CLASS	Unknown ORDER	Unknown FAMILY	Unknown GENUS	Unknown SPECIES	Unknown SUBSPECIES	1	2	9	0	0	8	7	6	22	6	0	0	4	0	0	0	2	0	0	1	3	11	0	7	0	7	1	0	2	0	1	0	2	14	1	3
Meta-Protein 1169	S10A7_HUMAN Protein S100-A7 OS=Homo sapiens GN=S100A7 PE=1 SV=4	3D-structure;Acetylation;Calcium;Complete proteome;Cytoplasm;Direct protein sequencing;Disulfide bond;Metal-binding;Polymorphism;Reference proteome;Repeat;Secreted;Zinc;	;	;K21126;	Unknown SUPERKINGDOM	Unknown KINGDOM	Unknown PHYLUM	Unknown CLASS	Unknown ORDER	Unknown FAMILY	Unknown GENUS	Unknown SPECIES	Unknown SUBSPECIES	0	0	0	0	0	0	1	0	4	0	0	0	0	0	0	0	0	0	0	0	6	0	0	24	14	0	0	7	0	0	0	0	0	0	0	1
Meta-Protein 3837	BLAST_EXBB_MANHA Biopolymer transport protein ExbB OS=Mannheimia haemolytica GN=exbB PE=3 SV=1_P72202	Cell inner membrane;Cell membrane;Membrane;Protein transport;Transmembrane;Transmembrane helix;Transport;	;	;	Unknown SUPERKINGDOM	Unknown KINGDOM	Unknown PHYLUM	Unknown CLASS	Unknown ORDER	Unknown FAMILY	Unknown GENUS	Unknown SPECIES	Unknown SUBSPECIES	0	0	0	0	13	19	16	0	0	0	0	0	0	0	0	0	0	8	0	0	1	29	0	14	0	0	0	0	0	0	0	5	0	0	29	0
Meta-Protein 380	BLAST_PTAS_BACSU Phosphate acetyltransferase OS=Bacillus subtilis (strain 168) GN=pta PE=1 SV=3_P39646	3D-structure;Acyltransferase;Complete proteome;Cytoplasm;Direct protein sequencing;Reference proteome;Transferase;	2.3.1.8;	K00625;	Unknown SUPERKINGDOM	Unknown KINGDOM	Unknown PHYLUM	Unknown CLASS	Unknown ORDER	Unknown FAMILY	Unknown GENUS	Unknown SPECIES	Unknown SUBSPECIES	0	13	1	0	0	18	5	9	35	3	1	0	3	0	1	0	7	2	1	2	0	1	0	0	0	0	0	2	0	0	0	0	0	18	2	0
Meta-Protein 2362	Metagenome unknown				Unknown SUPERKINGDOM	Unknown KINGDOM	Unknown PHYLUM	Unknown CLASS	Unknown ORDER	Unknown FAMILY	Unknown GENUS	Unknown SPECIES	Unknown SUBSPECIES	0	0	31	0	67	4	0	0	0	0	0	0	2	0	0	0	10	0	0	0	0	0	0	0	0	0	0	0	0	0	0	0	0	0	0	0
Meta-Protein 520	BLAST_ARGC_SYNP2 N-acetyl-gamma-glutamyl-phosphate reductase OS=Synechococcus sp. (strain ATCC 27264 / PCC 7002 / PR-6) GN=argC PE=3 SV=1_B1XIA1	3D-structure;Amino-acid biosynthesis;Arginine biosynthesis;Chloroplast;Complete proteome;Cytoplasm;Diaminopimelate biosynthesis;Lysine biosynthesis;Methionine biosynthesis;NAD;NADP;Oxidoreductase;Phosphoprotein;Plastid;Reference proteome;Threonine biosynthesis;Transit peptide;	1.2.1.11;1.2.1.38;	K00133;K00145;	Unknown SUPERKINGDOM	Unknown KINGDOM	Unknown PHYLUM	Unknown CLASS	Unknown ORDER	Unknown FAMILY	Unknown GENUS	Unknown SPECIES	Unknown SUBSPECIES	1	6	0	1	6	5	2	5	10	5	0	5	5	2	4	1	4	2	0	0	0	0	1	2	0	13	0	0	0	0	0	14	0	8	6	0
Meta-Protein 783	YIDC_WIGBR Membrane protein insertase YidC OS=Wigglesworthia glossinidia brevipalpis GN=yidC PE=3 SV=1	Cell inner membrane;Cell membrane;Chaperone;Complete proteome;Membrane;Protein transport;Reference proteome;Transmembrane;Transmembrane helix;Transport;	;	K03217;	Bacteria	Unknown KINGDOM	Proteobacteria	Gammaproteobacteria	Enterobacteriales	Enterobacteriaceae	Unknown GENUS	Unknown SPECIES	Unknown SUBSPECIES	3	1	0	3	5	2	3	3	2	2	3	3	3	2	0	0	0	1	0	0	7	1	1	2	4	1	5	6	2	3	2	5	5	3	5	2
Meta-Protein 300	BLAST_SPZ1B_WHEAT Serpin-Z1B OS=Triticum aestivum PE=1 SV=1_P93693	Acetylation;Complete proteome;Direct protein sequencing;Protease inhibitor;Reference proteome;Serine protease inhibitor;	;	;K13963;	Unknown SUPERKINGDOM	Unknown KINGDOM	Unknown PHYLUM	Unknown CLASS	Unknown ORDER	Unknown FAMILY	Unknown GENUS	Unknown SPECIES	Unknown SUBSPECIES	0	0	0	0	0	2	8	0	6	2	0	0	0	3	0	0	0	2	0	1	0	2	0	0	0	6	4	0	0	2	7	4	0	0	0	0
Meta-Protein 1132	BLAST_CHVE_AGRFC Multiple sugar-binding periplasmic receptor ChvE OS=Agrobacterium fabrum (strain C58 / ATCC 33970) GN=chvE PE=1 SV=2_P25548	3D-structure;Chemotaxis;Complete proteome;Crown gall tumor;Periplasm;Reference proteome;Signal;	;	K10546;	Unknown SUPERKINGDOM	Unknown KINGDOM	Unknown PHYLUM	Unknown CLASS	Unknown ORDER	Unknown FAMILY	Unknown GENUS	Unknown SPECIES	Unknown SUBSPECIES	0	4	0	0	0	0	6	2	14	2	0	6	6	4	1	2	0	1	0	13	0	0	2	0	0	6	2	1	0	0	0	2	0	14	2	0
Meta-Protein 456	BLAST_SP3AF_BACSU Stage III sporulation protein AF OS=Bacillus subtilis (strain 168) GN=spoIIIAF PE=4 SV=1_P49783	Cell membrane;Complete proteome;Membrane;Reference proteome;Sporulation;Transmembrane;Transmembrane helix;	;	K06395;	Bacteria	Unknown KINGDOM	Firmicutes	Bacilli	Bacillales	Bacillaceae	Bacillus	Bacillus subtilis subsp. subtilis str. 168	Bacillus subtilis subsp. subtilis	0	6	21	0	0	0	0	0	0	0	0	0	0	0	0	0	0	6	0	0	0	4	0	3	0	0	0	0	0	0	0	0	3	0	2	0
Meta-Protein 13969	LAP2A_HUMAN Lamina-associated polypeptide 2, isoform alpha OS=Homo sapiens GN=TMPO PE=1 SV=2	3D-structure;Acetylation;Alternative splicing;Cardiomyopathy;Chromosome;Coiled coil;Complete proteome;Direct protein sequencing;DNA-binding;Methylation;Nucleus;Pharmaceutical;Phosphoprotein;Polymorphism;Reference proteome;	;	;	Eukaryota	Metazoa	Chordata	Mammalia	Primates	Hominidae	Homo	Homo sapiens	Unknown SUBSPECIES	2	3	3	4	2	4	3	3	4	3	4	3	4	5	2	2	2	4	3	3	3	3	3	4	3	3	3	4	4	4	4	3	1	0	6	4
Meta-Protein 5292	Metagenome unknown				Unknown SUPERKINGDOM	Unknown KINGDOM	Unknown PHYLUM	Unknown CLASS	Unknown ORDER	Unknown FAMILY	Unknown GENUS	Unknown SPECIES	Unknown SUBSPECIES	0	0	0	0	0	1	60	0	0	0	0	0	0	0	0	0	0	0	0	0	0	0	0	38	0	0	0	1	0	0	0	10	0	0	0	0
Meta-Protein 19094	BLAST_YHFE_BACSU Putative aminopeptidase YhfE OS=Bacillus subtilis (strain 168) GN=yhfE PE=3 SV=1_O07603	Aminopeptidase;Complete proteome;Hydrolase;Metal-binding;Metalloprotease;Protease;Reference proteome;	3.4.11.-;	;	Bacteria	Unknown KINGDOM	Firmicutes	Bacilli	Bacillales	Bacillaceae	Bacillus	Bacillus subtilis subsp. subtilis str. 168	Bacillus subtilis subsp. subtilis	4	5	3	0	5	4	4	4	6	3	4	4	0	5	3	3	3	3	4	1	4	4	0	3	3	3	3	4	3	3	5	0	4	1	0	3
Meta-Protein 1389	BLAST_MALE_ENTAE Maltose-binding periplasmic protein OS=Enterobacter aerogenes GN=malE PE=3 SV=1_P18815	3D-structure;Complete proteome;Direct protein sequencing;Periplasm;Reference proteome;Signal;Sugar transport;Transport;	;	;K10108;	Unknown SUPERKINGDOM	Unknown KINGDOM	Unknown PHYLUM	Unknown CLASS	Unknown ORDER	Unknown FAMILY	Unknown GENUS	Unknown SPECIES	Unknown SUBSPECIES	0	0	0	0	0	0	0	0	0	0	0	0	0	0	0	0	0	0	0	0	0	36	0	0	0	0	0	0	0	0	0	0	0	0	0	10
Meta-Protein 16680	Metagenome unknown				Unknown SUPERKINGDOM	Unknown KINGDOM	Unknown PHYLUM	Unknown CLASS	Unknown ORDER	Unknown FAMILY	Unknown GENUS	Unknown SPECIES	Unknown SUBSPECIES	0	3	0	4	0	0	3	0	3	0	0	3	2	3	0	0	1	0	0	4	0	1	2	5	0	4	3	6	0	5	5	4	0	0	0	0
Meta-Protein 1163	Metagenome unknown				Unknown SUPERKINGDOM	Unknown KINGDOM	Unknown PHYLUM	Unknown CLASS	Unknown ORDER	Unknown FAMILY	Unknown GENUS	Unknown SPECIES	Unknown SUBSPECIES	0	0	0	0	0	0	0	0	0	0	0	0	0	0	0	0	0	0	0	2	0	0	22	8	0	0	0	0	0	46	0	0	0	23	0	0
Meta-Protein 857	BLAST_CATH_MOUSE Pro-cathepsin H OS=Mus musculus GN=Ctsh PE=1 SV=2_P49935	Complete proteome;Disulfide bond;Glycoprotein;Hydrolase;Lysosome;Protease;Reference proteome;Signal;Thiol protease;Vacuole;Zymogen;	3.4.22.-;3.4.22.16;3.4.22.50;	;K01366;	Unknown SUPERKINGDOM	Unknown KINGDOM	Unknown PHYLUM	Unknown CLASS	Unknown ORDER	Unknown FAMILY	Unknown GENUS	Unknown SPECIES	Unknown SUBSPECIES	0	0	5	0	0	10	21	0	0	0	0	0	0	0	0	1	0	7	1	2	0	40	0	4	0	0	0	0	4	0	0	0	0	0	0	0
Meta-Protein 22292	BLAST_DPO4_CLOTH DNA polymerase IV OS=Clostridium thermocellum (strain ATCC 27405 / DSM 1237 / NBRC 103400 / NCIMB 10682 / NRRL B-4536 / VPI 7372) GN=dinB PE=3 SV=1_A3DH61	Complete proteome;Cytoplasm;DNA damage;DNA repair;DNA replication;DNA-binding;DNA-directed DNA polymerase;Magnesium;Metal-binding;Mutator protein;Nucleotidyltransferase;Reference proteome;Transferase;	2.7.7.7;	K02346;	Bacteria	Unknown KINGDOM	Firmicutes	Clostridia	Clostridiales	Clostridiaceae	Clostridium	Clostridium thermocellum	Clostridium thermocellum ATCC 27405	5	1	2	0	3	2	3	0	0	2	4	3	0	0	5	0	0	0	4	1	2	0	0	0	0	0	4	31	24	0	3	6	2	0	2	4
Meta-Protein 6084	Metagenome unknown				Unknown SUPERKINGDOM	Unknown KINGDOM	Unknown PHYLUM	Unknown CLASS	Unknown ORDER	Unknown FAMILY	Unknown GENUS	Unknown SPECIES	Unknown SUBSPECIES	0	0	0	0	0	0	0	0	2	0	0	0	0	0	0	0	0	0	0	73	0	0	0	0	0	1	0	0	0	0	0	0	0	0	0	0
Meta-Protein 1710	BLAST_GUNA_CALSA Endoglucanase A OS=Caldicellulosiruptor saccharolyticus GN=celA PE=3 SV=2_P22534	Carbohydrate metabolism;Cellulose degradation;Glycosidase;Hydrolase;Polysaccharide degradation;Repeat;Signal;	3.2.1.4;	;	Unknown SUPERKINGDOM	Unknown KINGDOM	Unknown PHYLUM	Unknown CLASS	Unknown ORDER	Unknown FAMILY	Unknown GENUS	Unknown SPECIES	Unknown SUBSPECIES	0	0	0	0	1	0	0	0	0	0	0	24	0	0	0	0	0	0	0	0	0	0	0	0	0	29	0	0	0	21	0	0	0	83	0	0
Meta-Protein 573	BLAST_GLGC_EUBE2 Glucose-1-phosphate adenylyltransferase OS=Eubacterium eligens (strain ATCC 27750 / VPI C15-48) GN=glgC PE=3 SV=1_C4Z4L8	ATP-binding;Carbohydrate metabolism;Complete proteome;Glycogen biosynthesis;Glycogen metabolism;Nucleotide-binding;Nucleotidyltransferase;Reference proteome;Transferase;	2.7.7.27;	K00975;	Unknown SUPERKINGDOM	Unknown KINGDOM	Unknown PHYLUM	Unknown CLASS	Unknown ORDER	Unknown FAMILY	Unknown GENUS	Unknown SPECIES	Unknown SUBSPECIES	0	1	0	2	0	5	3	2	6	4	0	3	3	0	0	0	0	0	1	4	0	1	1	0	2	11	1	0	0	3	0	1	8	5	2	0
Meta-Protein 35309	OVALY_CHICK Ovalbumin-related protein Y OS=Gallus gallus GN=SERPINB14B PE=1 SV=1	Complete proteome;Direct protein sequencing;Disulfide bond;Glycoprotein;Proteoglycan;Reference proteome;Secreted;	;	;	Eukaryota	Metazoa	Chordata	Aves	Galliformes	Phasianidae	Gallus	Gallus gallus	Unknown SUBSPECIES	0	0	13	0	0	1	0	5	0	0	0	0	0	0	0	0	0	0	0	0	0	1	0	0	0	0	0	6	0	0	0	0	9	0	0	23
Meta-Protein 17194	P2C74_ORYSJ Probable protein phosphatase 2C 74 OS=Oryza sativa subsp. japonica GN=Os11g0242200 PE=3 SV=1	Complete proteome;Hydrolase;Magnesium;Manganese;Metal-binding;Protein phosphatase;Reference proteome;	3.1.3.16;	;	Eukaryota	Viridiplantae	Streptophyta	Liliopsida	Poales	Poaceae	Oryza	Oryza sativa	Oryza sativa Japonica Group	3	0	0	1	6	1	4	0	1	1	0	0	1	1	0	0	1	0	0	2	1	1	2	2	1	4	6	6	5	1	0	4	3	1	4	8
Meta-Protein 21767	BLAST_PRORY_HUMAN Proline-rich protein, Y-linked OS=Homo sapiens GN=PRORY PE=2 SV=1_Q9H606	Complete proteome;Reference proteome;	;	;	Eukaryota	Metazoa	Chordata	Mammalia	Primates	Hominidae	Homo	Homo sapiens	Unknown SUBSPECIES	5	3	1	0	5	1	6	2	5	4	6	1	0	3	3	4	2	0	1	0	6	6	6	2	3	0	6	7	6	1	8	2	5	1	0	4
Meta-Protein 199	EF1A_CHICK Elongation factor 1-alpha 1 OS=Gallus gallus GN=EEF1A PE=2 SV=1	3D-structure;Acetylation;Actin-binding;Alternative splicing;Autism spectrum disorder;Cell membrane;Complete proteome;Cytoplasm;Cytoskeleton;Direct protein sequencing;Disease mutation;Elongation factor;Epilepsy;GTP-binding;Isopeptide bond;Membrane;Mental retardation;Methylation;Nucleotide-binding;Nucleus;Phosphoprotein;Polymorphism;Protein biosynthesis;Reference proteome;Transcription;Transcriptio…	;	;K03231;	Unknown SUPERKINGDOM	Unknown KINGDOM	Unknown PHYLUM	Unknown CLASS	Unknown ORDER	Unknown FAMILY	Unknown GENUS	Unknown SPECIES	Unknown SUBSPECIES	1	3	2	0	0	4	0	0	0	0	0	0	0	0	1	0	0	1	0	0	2	4	0	4	9	0	0	2	0	0	10	0	24	3	0	0
Meta-Protein 1371	OMPX_ENTCL Outer membrane protein X OS=Enterobacter cloacae GN=ompX PE=1 SV=1	3D-structure;Cell outer membrane;Complete proteome;Direct protein sequencing;Membrane;Reference proteome;Signal;Transmembrane;Transmembrane beta strand;Transmembrane helix;	;	;K11934;	Unknown SUPERKINGDOM	Unknown KINGDOM	Unknown PHYLUM	Unknown CLASS	Unknown ORDER	Unknown FAMILY	Unknown GENUS	Unknown SPECIES	Unknown SUBSPECIES	0	0	0	0	0	0	0	0	0	0	0	0	0	0	0	0	0	0	0	0	5	20	0	0	0	0	0	0	2	12	0	0	0	0	0	39
Meta-Protein 12941	Metagenome unknown				Unknown SUPERKINGDOM	Unknown KINGDOM	Unknown PHYLUM	Unknown CLASS	Unknown ORDER	Unknown FAMILY	Unknown GENUS	Unknown SPECIES	Unknown SUBSPECIES	3	4	4	5	1	2	5	4	3	5	5	4	3	5	0	3	4	3	2	4	0	2	2	1	2	4	4	3	1	2	0	4	3	3	4	4
Meta-Protein 17309	Metagenome unknown				Unknown SUPERKINGDOM	Unknown KINGDOM	Unknown PHYLUM	Unknown CLASS	Unknown ORDER	Unknown FAMILY	Unknown GENUS	Unknown SPECIES	Unknown SUBSPECIES	2	0	0	2	3	2	0	0	0	0	1	0	1	0	0	0	0	0	0	3	14	0	8	0	8	0	6	9	10	2	0	6	6	1	5	4
Meta-Protein 184	BLAST_G1091_BACTN Glycosyl hydrolase family 109 protein 1 OS=Bacteroides thetaiotaomicron (strain ATCC 29148 / DSM 2079 / NCTC 10582 / E50 / VPI-5482) GN=BT_4243 PE=3 SV=1_Q89ZX8	Cell membrane;Complete proteome;Glycosidase;Hydrolase;Lipoprotein;Membrane;NAD;Palmitate;Reference proteome;Signal;	3.2.1.-;	;	Unknown SUPERKINGDOM	Unknown KINGDOM	Unknown PHYLUM	Unknown CLASS	Unknown ORDER	Unknown FAMILY	Unknown GENUS	Unknown SPECIES	Unknown SUBSPECIES	0	0	8	0	0	0	0	0	0	0	0	1	0	17	0	5	0	0	2	0	0	0	5	0	13	0	0	0	6	0	0	5	0	5	0	0
Meta-Protein 2663	Metagenome unknown				Unknown SUPERKINGDOM	Unknown KINGDOM	Unknown PHYLUM	Unknown CLASS	Unknown ORDER	Unknown FAMILY	Unknown GENUS	Unknown SPECIES	Unknown SUBSPECIES	0	0	0	0	0	0	0	0	0	1	0	0	0	0	0	0	0	0	0	4	0	0	0	0	0	0	0	0	0	0	0	0	0	0	0	0
Meta-Protein 867	BLAST_PDUA_SALTY Propanediol utilization protein PduA OS=Salmonella typhimurium (strain LT2 / SGSC1412 / ATCC 700720) GN=pduA PE=1 SV=1_P0A1C7	3D-structure;Complete proteome;Reference proteome;	;	;	Unknown SUPERKINGDOM	Unknown KINGDOM	Unknown PHYLUM	Unknown CLASS	Unknown ORDER	Unknown FAMILY	Unknown GENUS	Unknown SPECIES	Unknown SUBSPECIES	0	3	3	3	0	3	3	3	3	2	5	3	0	1	1	2	4	2	0	2	0	5	4	3	5	2	2	0	2	6	0	3	3	3	3	1
Meta-Protein 1786	BLAST_PDUC_SALTY Propanediol dehydratase large subunit OS=Salmonella typhimurium (strain LT2 / SGSC1412 / ATCC 700720) GN=pduC PE=1 SV=3_P37450	Cobalamin;Cobalt;Complete proteome;Lyase;Reference proteome;	4.2.1.28;	K01699;	Unknown SUPERKINGDOM	Unknown KINGDOM	Unknown PHYLUM	Unknown CLASS	Unknown ORDER	Unknown FAMILY	Unknown GENUS	Unknown SPECIES	Unknown SUBSPECIES	12	9	0	10	5	2	14	3	0	0	1	0	9	6	0	6	0	0	1	0	0	0	0	1	0	0	0	0	0	0	0	0	28	0	4	0
Meta-Protein 1997	BLAST_GUN1_STRRE Cellulase 1 OS=Streptomyces reticuli GN=cel1 PE=1 SV=1_Q05156	Carbohydrate metabolism;Cellulose degradation;Direct protein sequencing;Glycosidase;Hydrolase;Polysaccharide degradation;Signal;	3.2.1.4;	;	Unknown SUPERKINGDOM	Unknown KINGDOM	Unknown PHYLUM	Unknown CLASS	Unknown ORDER	Unknown FAMILY	Unknown GENUS	Unknown SPECIES	Unknown SUBSPECIES	0	0	0	0	0	0	0	0	0	0	0	0	0	0	0	0	0	0	0	0	0	0	0	0	0	22	0	0	0	0	0	0	0	79	0	0
Meta-Protein 5485	Metagenome unknown	3D-structure;Complete proteome;Direct protein sequencing;Disulfide bond;Hydrolase;Periplasm;Pharmaceutical;Reference proteome;Signal;	3.5.1.1;	K01424;	Unknown SUPERKINGDOM	Unknown KINGDOM	Unknown PHYLUM	Unknown CLASS	Unknown ORDER	Unknown FAMILY	Unknown GENUS	Unknown SPECIES	Unknown SUBSPECIES	0	0	0	0	0	0	0	0	0	0	0	0	0	0	0	0	0	0	0	0	0	32	0	0	0	0	1	0	0	0	0	0	0	0	0	8
Meta-Protein 4438	Metagenome unknown				Unknown SUPERKINGDOM	Unknown KINGDOM	Unknown PHYLUM	Unknown CLASS	Unknown ORDER	Unknown FAMILY	Unknown GENUS	Unknown SPECIES	Unknown SUBSPECIES	0	32	0	0	0	34	0	0	17	0	0	0	0	0	0	0	0	8	0	0	0	0	0	0	0	0	0	0	0	5	0	0	0	0	0	0
Meta-Protein 703	BLAST_HBD_CLOAB 3-hydroxybutyryl-CoA dehydrogenase OS=Clostridium acetobutylicum (strain ATCC 824 / DSM 792 / JCM 1419 / LMG 5710 / VKM B-1787) GN=hbd PE=1 SV=2_P52041	Complete proteome;Fatty acid metabolism;Lipid metabolism;NADP;Oxidoreductase;Reference proteome;	1.1.1.157;	K00074;	Unknown SUPERKINGDOM	Unknown KINGDOM	Unknown PHYLUM	Unknown CLASS	Unknown ORDER	Unknown FAMILY	Unknown GENUS	Unknown SPECIES	Unknown SUBSPECIES	0	0	0	0	37	0	0	0	0	0	0	0	0	0	0	0	0	0	0	6	0	0	20	0	0	0	7	0	0	0	7	3	0	0	0	0
Meta-Protein 360	BLAST_RL2_LACP7 50S ribosomal protein L2 OS=Lachnoclostridium phytofermentans (strain ATCC 700394 / DSM 18823 / ISDg) GN=rplB PE=3 SV=1_A9KJJ1	Complete proteome;RNA-binding;Reference proteome;Ribonucleoprotein;Ribosomal protein;rRNA-binding;	;	K02886;	Unknown SUPERKINGDOM	Unknown KINGDOM	Unknown PHYLUM	Unknown CLASS	Unknown ORDER	Unknown FAMILY	Unknown GENUS	Unknown SPECIES	Unknown SUBSPECIES	27	4	0	6	5	3	0	1	7	4	1	3	1	15	6	5	3	1	2	0	0	0	4	0	6	6	0	5	2	1	4	1	0	0	2	4
Meta-Protein 13868	BLAST_BGLM_ASPNC Probable beta-glucosidase M OS=Aspergillus niger (strain CBS 513.88 / FGSC A1513) GN=bglM PE=3 SV=1_A5ABF5	Carbohydrate metabolism;Cellulose degradation;Complete proteome;Glycoprotein;Glycosidase;Hydrolase;Polysaccharide degradation;Reference proteome;Secreted;Signal;	3.2.1.21;	K05349;	Eukaryota	Fungi	Ascomycota	Eurotiomycetes	Eurotiales	Trichocomaceae	Aspergillus	Aspergillus niger	Aspergillus niger CBS 513.88	2	1	0	4	1	0	0	0	0	0	2	0	3	0	1	2	0	0	2	0	5	4	5	2	4	0	3	5	6	0	2	2	5	1	4	2
Meta-Protein 13858	BLAST_RHSC_ECOLI Protein RhsC OS=Escherichia coli (strain K12) GN=rhsC PE=1 SV=4_P16918	Complete proteome;Reference proteome;Repeat;	;	;	Bacteria	Unknown KINGDOM	Proteobacteria	Gammaproteobacteria	Enterobacteriales	Enterobacteriaceae	Escherichia	Escherichia coli	Escherichia coli K-12	2	3	2	2	3	2	2	2	3	3	1	3	2	2	3	1	4	1	2	5	0	0	7	3	5	5	3	4	6	6	0	2	6	4	4	3
Meta-Protein 4382	Metagenome unknown				Unknown SUPERKINGDOM	Unknown KINGDOM	Unknown PHYLUM	Unknown CLASS	Unknown ORDER	Unknown FAMILY	Unknown GENUS	Unknown SPECIES	Unknown SUBSPECIES	0	0	0	0	13	8	12	0	0	0	0	0	0	0	0	0	0	10	0	0	0	11	0	2	0	0	0	0	4	18	0	0	0	0	0	0
Meta-Protein 1246	BLAST_PRTN3_HUMAN Myeloblastin OS=Homo sapiens GN=PRTN3 PE=1 SV=3_P24158	3D-structure;Cell membrane;Collagen degradation;Complete proteome;Direct protein sequencing;Disulfide bond;Glycoprotein;Hydrolase;Membrane;Polymorphism;Protease;Reference proteome;Secreted;Serine protease;Signal;Zymogen;	3.4.21.76;	K01350;	Eukaryota	Metazoa	Chordata	Mammalia	Primates	Hominidae	Homo	Homo sapiens	Unknown SUBSPECIES	0	1	0	0	1	0	0	0	2	1	0	1	1	0	0	0	0	0	0	0	11	0	0	1	3	0	1	0	9	0	21	0	54	0	0	0
Meta-Protein 13929	BLAST_BGLS_RUMAL Beta-glucosidase OS=Ruminococcus albus PE=3 SV=1_P15885	Carbohydrate metabolism;Cellulose degradation;Glycosidase;Hydrolase;Polysaccharide degradation;	3.2.1.21;	;	Bacteria	Unknown KINGDOM	Firmicutes	Clostridia	Clostridiales	Ruminococcaceae	Ruminococcus	Ruminococcus albus	Unknown SUBSPECIES	5	1	3	7	4	3	4	3	0	0	2	3	12	10	1	0	1	0	1	1	0	0	1	1	9	0	6	4	5	5	4	5	0	1	4	4
Meta-Protein 24138	BLAST_RL11_LACP7 50S ribosomal protein L11 OS=Lachnoclostridium phytofermentans (strain ATCC 700394 / DSM 18823 / ISDg) GN=rplK PE=3 SV=1_A9KJM0	Complete proteome;Methylation;RNA-binding;Reference proteome;Ribonucleoprotein;Ribosomal protein;rRNA-binding;	;	K02867;	Bacteria	Unknown KINGDOM	Firmicutes	Clostridia	Clostridiales	Clostridiaceae	Clostridium	Clostridium phytofermentans	Clostridium phytofermentans ISDg	6	2	0	2	0	1	2	4	8	6	3	5	4	0	1	0	0	0	0	2	0	1	4	0	4	8	2	0	2	6	0	2	0	1	5	0
Meta-Protein 21368	BLAST_ACDB1_PYRFU Acetate--CoA ligase [ADP-forming] I subunit beta OS=Pyrococcus furiosus (strain ATCC 43587 / DSM 3638 / JCM 8422 / Vc1) GN=acdBI PE=1 SV=1_E7FHP1	ATP-binding;Complete proteome;Cytoplasm;Direct protein sequencing;Ligase;Nucleotide-binding;Reference proteome;	6.2.1.13;	K22224;	Archaea	Unknown KINGDOM	Euryarchaeota	Thermococci	Thermococcales	Thermococcaceae	Pyrococcus	Pyrococcus furiosus	Pyrococcus furiosus DSM 3638	8	3	4	0	16	4	6	2	1	4	1	3	0	2	0	2	1	1	1	1	27	0	0	0	6	0	1	5	29	0	5	1	2	2	0	1
Meta-Protein 311	BLAST_CRT_CLOAB Short-chain-enoyl-CoA hydratase OS=Clostridium acetobutylicum (strain ATCC 824 / DSM 792 / JCM 1419 / LMG 5710 / VKM B-1787) GN=crt PE=1 SV=1_P52046	Complete proteome;Direct protein sequencing;Fatty acid metabolism;Lipid metabolism;Lyase;Reference proteome;	4.2.1.150;	K01715;	Bacteria	Unknown KINGDOM	Firmicutes	Clostridia	Clostridiales	Clostridiaceae	Clostridium	Clostridium acetobutylicum	Clostridium acetobutylicum ATCC 824	0	0	0	3	0	0	0	0	15	20	1	17	6	5	0	0	4	1	0	7	0	0	0	0	0	14	6	0	0	2	0	0	0	0	0	0
Meta-Protein 1703	Metagenome unknown				Unknown SUPERKINGDOM	Unknown KINGDOM	Unknown PHYLUM	Unknown CLASS	Unknown ORDER	Unknown FAMILY	Unknown GENUS	Unknown SPECIES	Unknown SUBSPECIES	0	0	4	0	0	0	47	0	0	0	0	23	0	0	0	0	0	0	0	0	0	0	0	0	0	4	0	0	0	4	0	0	0	5	0	0
Meta-Protein 1006	BLAST_G1091_BACTN Glycosyl hydrolase family 109 protein 1 OS=Bacteroides thetaiotaomicron (strain ATCC 29148 / DSM 2079 / NCTC 10582 / E50 / VPI-5482) GN=BT_4243 PE=3 SV=1_Q89ZX8	Cell membrane;Complete proteome;Glycosidase;Hydrolase;Lipoprotein;Membrane;NAD;Palmitate;Reference proteome;Signal;	3.2.1.-;	;	Unknown SUPERKINGDOM	Unknown KINGDOM	Unknown PHYLUM	Unknown CLASS	Unknown ORDER	Unknown FAMILY	Unknown GENUS	Unknown SPECIES	Unknown SUBSPECIES	0	0	0	2	1	1	0	2	0	0	0	1	0	1	0	3	0	1	1	1	0	0	0	1	1	1	0	0	6	0	0	2	1	11	0	0
Meta-Protein 15130	BLAST_RL7_LACP7 50S ribosomal protein L7/L12 OS=Lachnoclostridium phytofermentans (strain ATCC 700394 / DSM 18823 / ISDg) GN=rplL PE=3 SV=1_A9KJL7	Complete proteome;Reference proteome;Ribonucleoprotein;Ribosomal protein;	;	K02935;	Bacteria	Unknown KINGDOM	Firmicutes	Clostridia	Clostridiales	Clostridiaceae	Clostridium	Clostridium phytofermentans	Clostridium phytofermentans ISDg	2	3	4	3	3	3	2	3	4	2	2	4	3	3	0	4	1	2	2	3	0	2	4	1	2	5	4	1	0	4	0	3	3	4	3	0
Meta-Protein 24137	BLAST_RL11_LACP7 50S ribosomal protein L11 OS=Lachnoclostridium phytofermentans (strain ATCC 700394 / DSM 18823 / ISDg) GN=rplK PE=3 SV=1_A9KJM0	Complete proteome;Methylation;RNA-binding;Reference proteome;Ribonucleoprotein;Ribosomal protein;rRNA-binding;	;	K02867;	Bacteria	Unknown KINGDOM	Firmicutes	Clostridia	Clostridiales	Clostridiaceae	Clostridium	Clostridium phytofermentans	Clostridium phytofermentans ISDg	6	2	0	2	0	1	2	4	8	6	3	5	4	0	1	0	0	0	0	2	0	1	4	0	4	8	2	0	0	5	0	2	0	1	5	0
Meta-Protein 3889	Metagenome unknown				Unknown SUPERKINGDOM	Unknown KINGDOM	Unknown PHYLUM	Unknown CLASS	Unknown ORDER	Unknown FAMILY	Unknown GENUS	Unknown SPECIES	Unknown SUBSPECIES	0	0	0	0	26	0	42	0	0	0	0	0	0	0	0	0	0	10	1	0	0	31	0	7	0	0	0	0	2	0	0	0	0	0	0	0
Meta-Protein 19657	BLAST_FEOAB_PORGI Fe(2+) transport protein A/Fe(2+) transporter FeoB fusion protein OS=Porphyromonas gingivalis (strain ATCC BAA-308 / W83) GN=feoB1 PE=3 SV=1_Q7MV19	Cell inner membrane;Cell membrane;Complete proteome;GTP-binding;Ion transport;Iron;Iron transport;Membrane;Nucleotide-binding;Reference proteome;Transmembrane;Transmembrane helix;Transport;	;	K04759;	Bacteria	Unknown KINGDOM	Bacteroidetes	Bacteroidia	Bacteroidales	Porphyromonadaceae	Porphyromonas	Porphyromonas gingivalis	Porphyromonas gingivalis W83	2	0	0	5	0	0	2	0	2	0	5	0	0	0	0	0	0	0	0	0	8	5	6	8	7	0	6	10	7	7	9	4	8	0	5	6
Meta-Protein 385	BLAST_RL3_BACTN 50S ribosomal protein L3 OS=Bacteroides thetaiotaomicron (strain ATCC 29148 / DSM 2079 / NCTC 10582 / E50 / VPI-5482) GN=rplC PE=3 SV=1_Q8A476	Complete proteome;RNA-binding;Reference proteome;Ribonucleoprotein;Ribosomal protein;rRNA-binding;	;	K02906;	Unknown SUPERKINGDOM	Unknown KINGDOM	Unknown PHYLUM	Unknown CLASS	Unknown ORDER	Unknown FAMILY	Unknown GENUS	Unknown SPECIES	Unknown SUBSPECIES	0	2	0	2	0	8	3	4	0	0	0	5	0	0	1	0	0	11	4	0	0	26	1	0	12	0	0	0	24	0	0	2	2	1	0	10
Meta-Protein 1981	Metagenome unknown	Complete proteome;Cytoplasm;Glycolysis;Lyase;Magnesium;Metal-binding;Reference proteome;Secreted;	4.2.1.11;	K01689;	Unknown SUPERKINGDOM	Unknown KINGDOM	Unknown PHYLUM	Unknown CLASS	Unknown ORDER	Unknown FAMILY	Unknown GENUS	Unknown SPECIES	Unknown SUBSPECIES	0	0	0	0	0	0	3	0	1	0	0	0	1	3	0	0	0	0	0	14	2	10	1	0	0	0	45	8	0	0	0	0	0	0	1	0
Meta-Protein 1160	BLAST_RL10_GEOSW 50S ribosomal protein L10 OS=Geobacillus sp. (strain WCH70) GN=rplJ PE=3 SV=1_C5D3Q6	Complete proteome;RNA-binding;Reference proteome;Ribonucleoprotein;Ribosomal protein;rRNA-binding;	;	K02864;	Bacteria	Unknown KINGDOM	Firmicutes	Bacilli	Bacillales	Bacillaceae	Geobacillus	Geobacillus sp. WCH70	Unknown SUBSPECIES	0	1	0	2	0	4	0	0	6	0	0	0	10	0	0	0	0	0	1	0	0	4	0	2	0	0	2	0	0	0	0	0	0	12	0	0
Meta-Protein 916	BLAST_PUR9_CALS8 Bifunctional purine biosynthesis protein PurH OS=Caldicellulosiruptor saccharolyticus (strain ATCC 43494 / DSM 8903 / Tp8T 6331) GN=purH PE=3 SV=1_A4XKZ2	Complete proteome;Hydrolase;Multifunctional enzyme;Purine biosynthesis;Reference proteome;Transferase;	2.1.2.3;3.5.4.10;	K00602;	Unknown SUPERKINGDOM	Unknown KINGDOM	Unknown PHYLUM	Unknown CLASS	Unknown ORDER	Unknown FAMILY	Unknown GENUS	Unknown SPECIES	Unknown SUBSPECIES	4	2	1	2	13	7	27	2	5	3	1	2	1	3	0	1	0	5	1	0	0	19	2	0	0	3	0	0	0	0	0	0	0	1	1	0
Meta-Protein 33574	BLAST_YDHC_BACSU Uncharacterized HTH-type transcriptional regulator YdhC OS=Bacillus subtilis (strain 168) GN=ydhC PE=4 SV=1_O05494	Complete proteome;DNA-binding;Reference proteome;Transcription;Transcription regulation;	;	;	Bacteria	Unknown KINGDOM	Firmicutes	Bacilli	Bacillales	Bacillaceae	Bacillus	Bacillus subtilis subsp. subtilis str. 168	Bacillus subtilis subsp. subtilis	8	3	43	0	0	3	0	7	0	0	0	10	3	0	3	0	0	0	3	0	1	0	0	0	0	0	5	0	0	3	0	0	0	3	0	0
Meta-Protein 12820	Metagenome unknown				Unknown SUPERKINGDOM	Unknown KINGDOM	Unknown PHYLUM	Unknown CLASS	Unknown ORDER	Unknown FAMILY	Unknown GENUS	Unknown SPECIES	Unknown SUBSPECIES	4	2	0	1	3	1	2	1	3	2	2	2	1	5	2	2	2	2	3	5	3	0	3	2	0	2	1	2	2	2	4	1	3	2	2	2
Meta-Protein 1898	RS8_YERPY 30S ribosomal protein S8 OS=Yersinia pseudotuberculosis serotype O:3 (strain YPIII) GN=rpsH PE=3 SV=1	Complete proteome;RNA-binding;Reference proteome;Ribonucleoprotein;Ribosomal protein;rRNA-binding;	;	K02994;	Bacteria	Unknown KINGDOM	Proteobacteria	Gammaproteobacteria	Unknown ORDER	Unknown FAMILY	Unknown GENUS	Unknown SPECIES	Unknown SUBSPECIES	4	3	1	4	3	2	3	1	3	1	2	3	3	1	1	2	1	0	1	3	1	2	9	2	6	5	4	5	3	5	0	0	4	1	5	2
Meta-Protein 487	BLAST_SUSC_BACTN TonB-dependent receptor SusC OS=Bacteroides thetaiotaomicron (strain ATCC 29148 / DSM 2079 / NCTC 10582 / E50 / VPI-5482) GN=susC PE=1 SV=1_Q8A1G1	Carbohydrate metabolism;Cell outer membrane;Complete proteome;Membrane;Receptor;Reference proteome;Signal;TonB box;Transmembrane;Transmembrane beta strand;Transport;	;	K21573;	Unknown SUPERKINGDOM	Unknown KINGDOM	Unknown PHYLUM	Unknown CLASS	Unknown ORDER	Unknown FAMILY	Unknown GENUS	Unknown SPECIES	Unknown SUBSPECIES	0	4	0	0	103	0	0	0	0	0	0	0	0	0	0	0	0	0	0	0	0	0	0	0	0	0	0	0	0	0	0	0	0	0	1	0
Meta-Protein 1557	BLAST_TPIS_CLOB8 Triosephosphate isomerase OS=Clostridium beijerinckii (strain ATCC 51743 / NCIMB 8052) GN=tpiA PE=3 SV=1_A6LR06	3D-structure;ATP-binding;Complete proteome;Cytoplasm;Direct protein sequencing;Gluconeogenesis;Glycolysis;Isomerase;Kinase;Nucleotide-binding;Pentose shunt;Phosphoprotein;Reference proteome;Transferase;	2.7.2.3;5.3.1.1;	K00927;K01803;	Unknown SUPERKINGDOM	Unknown KINGDOM	Unknown PHYLUM	Unknown CLASS	Unknown ORDER	Unknown FAMILY	Unknown GENUS	Unknown SPECIES	Unknown SUBSPECIES	4	2	0	0	1	3	10	9	8	2	0	3	0	4	2	8	3	2	2	4	0	0	1	0	3	5	0	4	1	0	11	1	0	5	0	0
Meta-Protein 302	ALDOA_RABIT Fructose-bisphosphate aldolase A OS=Oryctolagus cuniculus GN=ALDOA PE=1 SV=2	3D-structure;Acetylation;Alternative splicing;Complete proteome;Cytoplasm;Direct protein sequencing;Disease mutation;Glycogen storage disease;Glycolysis;Hereditary hemolytic anemia;Isopeptide bond;Lyase;Phosphoprotein;Polymorphism;Reference proteome;Schiff base;Ubl conjugation;	4.1.2.13;	;K01623;	Unknown SUPERKINGDOM	Unknown KINGDOM	Unknown PHYLUM	Unknown CLASS	Unknown ORDER	Unknown FAMILY	Unknown GENUS	Unknown SPECIES	Unknown SUBSPECIES	0	0	0	0	0	0	1	0	0	0	0	0	0	0	0	0	0	0	0	0	0	0	0	1	0	0	0	9	0	8	8	0	0	0	0	0
Meta-Protein 27210	BLAST_RS8_CALS4 30S ribosomal protein S8 OS=Caldanaerobacter subterraneus subsp. tengcongensis (strain DSM 15242 / JCM 11007 / NBRC 100824 / MB4) GN=rpsH PE=3 SV=1_Q8R7W8	Complete proteome;RNA-binding;Reference proteome;Ribonucleoprotein;Ribosomal protein;rRNA-binding;	;	K02994;	Bacteria	Unknown KINGDOM	Firmicutes	Clostridia	Thermoanaerobacterales	Thermoanaerobacteraceae	Caldanaerobacter	Thermoanaerobacter tengcongensis MB4	Caldanaerobacter subterraneus subsp. tengcongensis	4	3	1	5	3	2	3	1	3	1	2	3	3	1	1	2	1	0	1	3	1	2	9	2	6	5	4	5	3	6	0	0	4	1	5	0
Meta-Protein 13140	Metagenome unknown				Unknown SUPERKINGDOM	Unknown KINGDOM	Unknown PHYLUM	Unknown CLASS	Unknown ORDER	Unknown FAMILY	Unknown GENUS	Unknown SPECIES	Unknown SUBSPECIES	3	1	1	2	5	1	1	3	2	0	1	1	2	0	0	1	0	0	0	3	10	1	2	5	0	1	1	1	6	0	1	8	2	2	7	4
Meta-Protein 1686	Metagenome unknown				Unknown SUPERKINGDOM	Unknown KINGDOM	Unknown PHYLUM	Unknown CLASS	Unknown ORDER	Unknown FAMILY	Unknown GENUS	Unknown SPECIES	Unknown SUBSPECIES	0	0	27	0	6	0	0	4	15	0	0	0	1	0	0	0	19	0	0	8	0	7	0	0	0	16	0	0	0	8	0	0	0	67	0	0
Meta-Protein 18851	Metagenome unknown				Unknown SUPERKINGDOM	Unknown KINGDOM	Unknown PHYLUM	Unknown CLASS	Unknown ORDER	Unknown FAMILY	Unknown GENUS	Unknown SPECIES	Unknown SUBSPECIES	2	2	0	3	3	0	5	0	3	2	3	0	3	3	1	1	2	0	1	1	5	4	5	2	7	0	3	6	4	2	3	4	3	1	6	4
Meta-Protein 794	BLAST_FTSWL_MYCLE Uncharacterized FtsW-like protein OS=Mycobacterium leprae (strain TN) GN=rodA PE=3 SV=2_Q50186	Cell membrane;Complete proteome;Membrane;Reference proteome;Transmembrane;Transmembrane helix;	;	;	Bacteria	Unknown KINGDOM	Actinobacteria	Actinobacteria	Actinomycetales	Mycobacteriaceae	Mycobacterium	Mycobacterium leprae	Mycobacterium leprae TN	3	4	4	5	1	2	5	4	3	3	5	4	3	5	0	3	4	3	2	3	0	1	2	2	2	4	4	3	1	2	0	4	3	3	4	1
Meta-Protein 15860	BLAST_ADPR_LACLL ATP-dependent protease OS=Lactococcus lactis subsp. lactis PE=4 SV=1_Q06715	Hydrolase;Plasmid;Protease;	3.4.21.-;	;	Bacteria	Unknown KINGDOM	Firmicutes	Bacilli	Lactobacillales	Streptococcaceae	Lactococcus	Lactococcus lactis	Lactococcus lactis subsp. lactis	1	5	4	3	2	4	5	5	3	5	3	4	4	2	1	0	1	0	0	4	0	3	0	4	0	4	2	0	0	0	2	5	4	4	6	0
Meta-Protein 1100	BLAST_CLPB_BACTN Chaperone protein ClpB OS=Bacteroides thetaiotaomicron (strain ATCC 29148 / DSM 2079 / NCTC 10582 / E50 / VPI-5482) GN=clpB PE=3 SV=1_Q89YY3	ATP-binding;Chaperone;Coiled coil;Complete proteome;Cytoplasm;Nucleotide-binding;Reference proteome;Repeat;Stress response;	;	K03695;	Unknown SUPERKINGDOM	Unknown KINGDOM	Unknown PHYLUM	Unknown CLASS	Unknown ORDER	Unknown FAMILY	Unknown GENUS	Unknown SPECIES	Unknown SUBSPECIES	2	4	7	1	1	4	9	4	9	3	2	1	4	1	1	0	2	1	0	3	0	18	0	2	0	0	1	0	0	0	0	1	1	3	3	23
Meta-Protein 13142	Metagenome unknown				Unknown SUPERKINGDOM	Unknown KINGDOM	Unknown PHYLUM	Unknown CLASS	Unknown ORDER	Unknown FAMILY	Unknown GENUS	Unknown SPECIES	Unknown SUBSPECIES	0	0	0	1	3	1	4	2	2	0	1	1	2	3	2	1	0	0	2	2	6	1	1	4	1	0	5	4	6	0	1	6	2	1	5	8
Meta-Protein 29448	Metagenome unknown				Unknown SUPERKINGDOM	Unknown KINGDOM	Unknown PHYLUM	Unknown CLASS	Unknown ORDER	Unknown FAMILY	Unknown GENUS	Unknown SPECIES	Unknown SUBSPECIES	6	3	1	0	5	0	2	2	6	1	3	6	0	0	4	7	0	0	4	3	0	0	0	1	1	5	1	2	10	17	0	0	4	8	0	3
Meta-Protein 1612	Metagenome unknown	Complete proteome;Gluconate utilization;NADP;Oxidoreductase;Pentose shunt;Reference proteome;	1.1.1.44;	K00033;	Unknown SUPERKINGDOM	Unknown KINGDOM	Unknown PHYLUM	Unknown CLASS	Unknown ORDER	Unknown FAMILY	Unknown GENUS	Unknown SPECIES	Unknown SUBSPECIES	1	0	0	0	0	0	0	0	0	0	0	0	0	0	0	0	1	0	0	0	6	1	0	0	0	0	0	156	1	0	0	0	0	0	1	0
Meta-Protein 5323	BLAST_PORF_PSEFL Outer membrane porin F OS=Pseudomonas fluorescens GN=oprF PE=1 SV=1_P37726	Cell outer membrane;Complete proteome;Direct protein sequencing;Disulfide bond;Ion transport;Membrane;Porin;Pyrrolidone carboxylic acid;Reference proteome;Repeat;Signal;Transmembrane;Transmembrane beta strand;Transport;	;	;	Unknown SUPERKINGDOM	Unknown KINGDOM	Unknown PHYLUM	Unknown CLASS	Unknown ORDER	Unknown FAMILY	Unknown GENUS	Unknown SPECIES	Unknown SUBSPECIES	0	0	0	0	0	0	0	0	0	0	0	0	0	0	1	0	0	0	0	0	0	0	0	9	0	0	1	0	0	0	0	0	0	0	68	0
Meta-Protein 1283	HBA_LAMVI Hemoglobin subunit alpha OS=Lama vicugna GN=HBA PE=1 SV=1	3D-structure;Acetylation;Complete proteome;Direct protein sequencing;Disease mutation;Glycation;Glycoprotein;Heme;Hereditary hemolytic anemia;Iron;Metal-binding;Oxygen transport;Phosphoprotein;Polymorphism;Reference proteome;Transport;	;	;K13822;	Unknown SUPERKINGDOM	Unknown KINGDOM	Unknown PHYLUM	Unknown CLASS	Unknown ORDER	Unknown FAMILY	Unknown GENUS	Unknown SPECIES	Unknown SUBSPECIES	0	0	0	0	0	0	0	0	0	0	0	0	0	0	0	0	0	0	0	0	0	0	0	43	0	0	0	1	0	0	0	0	1	0	0	0
Meta-Protein 34124	BLAST_PO21_NASVI Retrovirus-related Pol polyprotein from type-1 retrotransposable element R2 (Fragment) OS=Nasonia vitripennis PE=3 SV=2_Q03278	Complete proteome;Endonuclease;Hydrolase;Metal-binding;Nuclease;Nucleotidyltransferase;RNA-directed DNA polymerase;Reference proteome;Transferase;Transposable element;Zinc;Zinc-finger;	2.7.7.49;	;	Eukaryota	Metazoa	Arthropoda	Insecta	Hymenoptera	Pteromalidae	Nasonia	Nasonia vitripennis	Unknown SUBSPECIES	0	0	0	4	0	0	0	1	0	3	2	0	2	0	1	0	0	0	0	0	5	0	2	7	0	0	3	7	0	0	5	5	2	0	10	3
Meta-Protein 33567	BLAST_BCRA_THAAR Benzoyl-CoA reductase subunit A OS=Thauera aromatica GN=bcrA PE=1 SV=1_O87876	4Fe-4S;ATP-binding;Aromatic hydrocarbons catabolism;Direct protein sequencing;Iron;Iron-sulfur;Metal-binding;Nucleotide-binding;Oxidoreductase;	1.3.7.8;1.3.99.n1;	K04114;	Bacteria	Unknown KINGDOM	Proteobacteria	Betaproteobacteria	Rhodocyclales	Rhodocyclaceae	Thauera	Thauera aromatica	Unknown SUBSPECIES	7	3	38	0	0	4	0	9	0	0	0	9	4	0	3	0	0	0	4	0	0	0	0	0	0	0	6	0	0	3	0	0	0	4	0	0
Meta-Protein 245	BLAST_ARAA_BACTN L-arabinose isomerase OS=Bacteroides thetaiotaomicron (strain ATCC 29148 / DSM 2079 / NCTC 10582 / E50 / VPI-5482) GN=araA PE=3 SV=1_Q8AAW1	Arabinose catabolism;Carbohydrate metabolism;Complete proteome;Isomerase;Manganese;Metal-binding;Reference proteome;	5.3.1.4;	K01804;	Unknown SUPERKINGDOM	Unknown KINGDOM	Unknown PHYLUM	Unknown CLASS	Unknown ORDER	Unknown FAMILY	Unknown GENUS	Unknown SPECIES	Unknown SUBSPECIES	0	0	0	0	5	11	11	0	0	0	0	0	0	0	0	0	0	19	0	0	0	29	0	12	0	0	0	0	4	0	0	3	0	0	0	0
Meta-Protein 567	BLAST_TFRA_METTM Fumarate reductase (CoM/CoB) subunit A OS=Methanothermobacter marburgensis (strain ATCC BAA-927 / DSM 2133 / JCM 14651 / NBRC 100331 / OCM 82 / Marburg) GN=tfrA PE=1 SV=1_D9PU00	Cell membrane;Chloroplast;Complete proteome;Cytoplasm;Direct protein sequencing;Electron transport;FAD;Flavoprotein;Membrane;Mitochondrion;NAD;Nucleus;Oxidoreductase;Periplasm;Phosphoprotein;Plastid;Pyridine nucleotide biosynthesis;Reference proteome;Signal;Transit peptide;Transport;Tricarboxylic acid cycle;	;1.3.1.6;1.3.4.1;1.3.5.-;1.3.5.1;1.4.3.16;	;K00239;K00278;K18209;	Unknown SUPERKINGDOM	Unknown KINGDOM	Unknown PHYLUM	Unknown CLASS	Unknown ORDER	Unknown FAMILY	Unknown GENUS	Unknown SPECIES	Unknown SUBSPECIES	4	6	2	1	0	6	4	8	10	8	1	5	2	4	3	2	3	3	0	2	0	0	0	0	0	8	0	0	0	4	0	6	0	8	0	0
Meta-Protein 2848	Metagenome unknown				Unknown SUPERKINGDOM	Unknown KINGDOM	Unknown PHYLUM	Unknown CLASS	Unknown ORDER	Unknown FAMILY	Unknown GENUS	Unknown SPECIES	Unknown SUBSPECIES	0	0	0	0	4	15	62	0	0	0	0	0	0	0	0	0	0	7	0	0	0	29	0	3	0	0	0	0	0	0	0	0	0	0	9	0
Meta-Protein 888	RS1_MYCTU 30S ribosomal protein S1 OS=Mycobacterium tuberculosis (strain ATCC 25618 / H37Rv) GN=rpsA PE=1 SV=1	3D-structure;Complete proteome;Cytoplasm;Direct protein sequencing;Magnesium;Metal-binding;Nucleotidyltransferase;RNA-binding;Reference proteome;Repeat;Ribonucleoprotein;Ribosomal protein;Transferase;	;2.7.7.8;	K00962;K02945;	Bacteria	Unknown KINGDOM	Unknown PHYLUM	Unknown CLASS	Unknown ORDER	Unknown FAMILY	Unknown GENUS	Unknown SPECIES	Unknown SUBSPECIES	0	12	4	0	20	3	35	3	21	0	0	0	7	12	0	0	0	0	0	1	0	0	7	0	0	5	5	0	0	0	0	2	7	0	6	0
Meta-Protein 597	BLAST_NORV_PECCP Anaerobic nitric oxide reductase flavorubredoxin OS=Pectobacterium carotovorum subsp. carotovorum (strain PC1) GN=norV PE=3 SV=1_C6D9Q2	Complete proteome;Cytoplasm;Electron transport;FMN;Flavoprotein;Iron;Metal-binding;Oxidoreductase;Reference proteome;Transport;	;	K12264;	Bacteria	Unknown KINGDOM	Proteobacteria	Gammaproteobacteria	Enterobacteriales	Enterobacteriaceae	Unknown GENUS	Unknown SPECIES	Unknown SUBSPECIES	2	5	4	0	2	4	5	5	4	5	3	5	0	4	1	1	3	0	0	4	0	3	0	4	0	4	2	0	0	0	2	5	4	4	0	0
Meta-Protein 16813	Metagenome unknown				Unknown SUPERKINGDOM	Unknown KINGDOM	Unknown PHYLUM	Unknown CLASS	Unknown ORDER	Unknown FAMILY	Unknown GENUS	Unknown SPECIES	Unknown SUBSPECIES	2	1	0	3	2	1	1	2	1	1	0	1	2	0	2	0	1	1	1	3	6	2	6	7	2	3	3	2	1	0	3	5	2	2	0	2
Meta-Protein 115	BLAST_CYCB_BACSU Cyclodextrin-binding protein OS=Bacillus subtilis (strain 168) GN=cycB PE=1 SV=1_O07009	Cell membrane;Complete proteome;Lipoprotein;Membrane;Palmitate;Reference proteome;Signal;Sugar transport;Transport;	;	K15770;	Bacteria	Unknown KINGDOM	Firmicutes	Bacilli	Bacillales	Bacillaceae	Bacillus	Bacillus subtilis subsp. subtilis str. 168	Bacillus subtilis subsp. subtilis	0	0	37	0	0	0	0	0	0	0	0	40	0	0	0	0	0	0	0	30	0	0	0	0	0	0	0	0	0	0	0	0	0	0	0	0
Meta-Protein 495	BLAST_TPIS_PARD8 Triosephosphate isomerase OS=Parabacteroides distasonis (strain ATCC 8503 / DSM 20701 / CIP 104284 / JCM 5825 / NCTC 11152) GN=tpiA PE=3 SV=1_A6LFF0	Complete proteome;Cytoplasm;Gluconeogenesis;Glycolysis;Isomerase;Pentose shunt;Reference proteome;	5.3.1.1;	K01803;	Unknown SUPERKINGDOM	Unknown KINGDOM	Unknown PHYLUM	Unknown CLASS	Unknown ORDER	Unknown FAMILY	Unknown GENUS	Unknown SPECIES	Unknown SUBSPECIES	0	0	6	0	0	0	0	2	1	0	1	1	1	0	0	0	1	0	0	2	0	2	0	0	0	11	0	0	0	2	0	0	0	38	0	0
Meta-Protein 1681	Metagenome unknown				Unknown SUPERKINGDOM	Unknown KINGDOM	Unknown PHYLUM	Unknown CLASS	Unknown ORDER	Unknown FAMILY	Unknown GENUS	Unknown SPECIES	Unknown SUBSPECIES	0	0	0	1	0	6	41	3	8	0	0	0	2	3	0	0	0	0	0	0	0	0	0	0	2	0	0	0	0	81	0	0	0	0	0	0
Meta-Protein 2347	Metagenome unknown				Unknown SUPERKINGDOM	Unknown KINGDOM	Unknown PHYLUM	Unknown CLASS	Unknown ORDER	Unknown FAMILY	Unknown GENUS	Unknown SPECIES	Unknown SUBSPECIES	5	0	0	0	0	0	7	0	10	0	0	0	0	10	10	15	0	6	16	0	0	0	0	0	0	15	0	0	0	0	0	14	0	0	0	0
Meta-Protein 17107	BLAST_FLGL_BACSU Flagellar hook-associated protein 3 OS=Bacillus subtilis (strain 168) GN=flgL PE=3 SV=1_P96501	Bacterial flagellum;Complete proteome;Reference proteome;Secreted;	;	K02397;	Bacteria	Unknown KINGDOM	Firmicutes	Bacilli	Bacillales	Bacillaceae	Bacillus	Bacillus subtilis subsp. subtilis str. 168	Bacillus subtilis subsp. subtilis	0	1	2	0	1	1	2	0	2	0	0	1	0	0	0	0	0	0	0	2	6	0	0	2	3	0	4	2	8	2	4	1	57	0	1	0
Meta-Protein 13584	BLAST_LYTE_BACSU Probable peptidoglycan endopeptidase LytE OS=Bacillus subtilis (strain 168) GN=lytE PE=1 SV=1_P54421	Cell wall;Cell wall biogenesis/degradation;Complete proteome;Direct protein sequencing;Hydrolase;Protease;Reference proteome;Repeat;Secreted;Signal;Thiol protease;	3.4.-.-;	K19224;	Bacteria	Unknown KINGDOM	Firmicutes	Bacilli	Bacillales	Bacillaceae	Bacillus	Bacillus subtilis subsp. subtilis str. 168	Bacillus subtilis subsp. subtilis	3	2	3	1	1	3	2	1	4	2	1	2	2	2	0	1	0	2	0	2	3	3	3	5	4	0	3	4	5	6	1	4	2	0	3	3
Meta-Protein 19345	Metagenome unknown				Unknown SUPERKINGDOM	Unknown KINGDOM	Unknown PHYLUM	Unknown CLASS	Unknown ORDER	Unknown FAMILY	Unknown GENUS	Unknown SPECIES	Unknown SUBSPECIES	1	2	0	3	5	0	1	1	3	0	0	1	2	1	0	1	2	0	0	0	8	0	6	3	4	1	3	7	6	3	3	2	10	0	2	2
Meta-Protein 15613	BLAST_ADDA_CLOK1 ATP-dependent helicase/nuclease subunit A OS=Clostridium kluyveri (strain NBRC 12016) GN=addA PE=3 SV=1_B9DZK4	ATP-binding;Complete proteome;DNA damage;DNA repair;DNA-binding;Exonuclease;Helicase;Hydrolase;Nuclease;Nucleotide-binding;Reference proteome;	3.1.-.-;3.6.4.12;	K16898;	Bacteria	Unknown KINGDOM	Firmicutes	Clostridia	Clostridiales	Clostridiaceae	Clostridium	Clostridium kluyveri	Unknown SUBSPECIES	4	3	1	5	3	3	5	3	4	0	3	4	3	4	0	1	2	0	1	2	0	4	4	4	0	1	3	7	4	2	1	5	1	4	4	0
Meta-Protein 18898	BLAST_YQGS_BACSU Lipoteichoic acid synthase-like YqgS OS=Bacillus subtilis (strain 168) GN=yqgS PE=3 SV=2_P54496	Cell membrane;Complete proteome;Manganese;Membrane;Metal-binding;Reference proteome;Secreted;Transmembrane;Transmembrane helix;	;	;	Bacteria	Unknown KINGDOM	Firmicutes	Bacilli	Bacillales	Bacillaceae	Bacillus	Bacillus subtilis subsp. subtilis str. 168	Bacillus subtilis subsp. subtilis	3	2	3	0	1	3	3	1	4	2	1	2	0	2	0	0	0	1	1	3	4	3	4	5	4	0	4	4	4	6	1	4	3	0	0	3
Meta-Protein 948	BLAST_RL17_EUBE2 50S ribosomal protein L17 OS=Eubacterium eligens (strain ATCC 27750 / VPI C15-48) GN=rplQ PE=3 SV=1_C4Z2V8	Complete proteome;Mitochondrion;Reference proteome;Ribonucleoprotein;Ribosomal protein;	;	K02879;	Unknown SUPERKINGDOM	Unknown KINGDOM	Unknown PHYLUM	Unknown CLASS	Unknown ORDER	Unknown FAMILY	Unknown GENUS	Unknown SPECIES	Unknown SUBSPECIES	13	6	2	3	2	4	0	6	5	5	2	6	4	5	3	2	0	0	1	6	1	2	0	0	1	5	4	3	0	2	2	3	3	2	0	0
Meta-Protein 539	RS4_AGARV 30S ribosomal protein S4 OS=Agathobacter rectalis (strain ATCC 33656 / DSM 3377 / JCM 17463 / KCTC 5835 / VPI 0990) GN=rpsD PE=3 SV=1	Complete proteome;RNA-binding;Reference proteome;Ribonucleoprotein;Ribosomal protein;rRNA-binding;	;	K02986;	Unknown SUPERKINGDOM	Unknown KINGDOM	Unknown PHYLUM	Unknown CLASS	Unknown ORDER	Unknown FAMILY	Unknown GENUS	Unknown SPECIES	Unknown SUBSPECIES	29	6	0	4	5	7	6	2	15	21	0	15	4	11	2	1	0	0	0	0	0	0	0	0	0	0	0	2	0	0	2	0	0	2	0	3
Meta-Protein 6081	Metagenome unknown				Unknown SUPERKINGDOM	Unknown KINGDOM	Unknown PHYLUM	Unknown CLASS	Unknown ORDER	Unknown FAMILY	Unknown GENUS	Unknown SPECIES	Unknown SUBSPECIES	0	0	0	0	0	0	0	0	0	0	0	0	0	0	0	0	0	0	0	0	0	0	0	0	0	124	0	0	0	0	0	0	0	0	0	0
Meta-Protein 16822	BLAST_Y366_HAEIN Uncharacterized protein HI_0366 OS=Haemophilus influenzae (strain ATCC 51907 / DSM 11121 / KW20 / Rd) GN=HI_0366 PE=3 SV=1_P43988	Complete proteome;Reference proteome;Signal;	;	K02656;	Bacteria	Unknown KINGDOM	Proteobacteria	Gammaproteobacteria	Pasteurellales	Pasteurellaceae	Haemophilus	Haemophilus influenzae	Haemophilus influenzae Rd KW20	0	0	0	3	0	1	0	0	1	3	5	0	0	0	0	0	0	1	1	2	7	0	6	1	7	0	5	8	1	1	3	25	4	1	2	4
Meta-Protein 1385	Metagenome unknown	Complete proteome;RNA-binding;Reference proteome;Ribonucleoprotein;Ribosomal protein;rRNA-binding;	;	K02986;	Unknown SUPERKINGDOM	Unknown KINGDOM	Unknown PHYLUM	Unknown CLASS	Unknown ORDER	Unknown FAMILY	Unknown GENUS	Unknown SPECIES	Unknown SUBSPECIES	25	9	1	6	6	3	6	4	3	5	0	10	1	5	2	1	0	0	0	0	0	0	0	0	4	0	0	0	1	0	4	1	0	3	3	11
Meta-Protein 4250	Metagenome unknown				Unknown SUPERKINGDOM	Unknown KINGDOM	Unknown PHYLUM	Unknown CLASS	Unknown ORDER	Unknown FAMILY	Unknown GENUS	Unknown SPECIES	Unknown SUBSPECIES	0	0	0	0	0	37	0	0	0	0	0	0	0	0	0	0	0	20	0	0	0	15	0	0	0	0	0	0	0	32	0	0	0	0	0	0
Meta-Protein 3843	BLAST_SUSC_BACTN TonB-dependent receptor SusC OS=Bacteroides thetaiotaomicron (strain ATCC 29148 / DSM 2079 / NCTC 10582 / E50 / VPI-5482) GN=susC PE=1 SV=1_Q8A1G1	Carbohydrate metabolism;Cell outer membrane;Complete proteome;Membrane;Receptor;Reference proteome;Signal;TonB box;Transmembrane;Transmembrane beta strand;Transport;	;	K21573;	Unknown SUPERKINGDOM	Unknown KINGDOM	Unknown PHYLUM	Unknown CLASS	Unknown ORDER	Unknown FAMILY	Unknown GENUS	Unknown SPECIES	Unknown SUBSPECIES	0	0	0	0	6	6	1	0	0	0	0	0	0	0	0	0	0	3	0	0	0	33	0	8	0	0	0	0	5	5	0	3	0	0	0	0
Meta-Protein 411	BLAST_RPOA_CLOTH DNA-directed RNA polymerase subunit alpha OS=Clostridium thermocellum (strain ATCC 27405 / DSM 1237 / NBRC 103400 / NCIMB 10682 / NRRL B-4536 / VPI 7372) GN=rpoA PE=3 SV=1_A3DJK1	3D-structure;Complete proteome;DNA-directed RNA polymerase;Nucleotidyltransferase;Reference proteome;Transcription;Transferase;	2.7.7.6;	K03040;	Unknown SUPERKINGDOM	Unknown KINGDOM	Unknown PHYLUM	Unknown CLASS	Unknown ORDER	Unknown FAMILY	Unknown GENUS	Unknown SPECIES	Unknown SUBSPECIES	3	2	3	4	0	1	3	3	21	3	2	4	2	0	0	1	4	2	0	1	0	1	1	1	0	14	0	0	1	4	0	1	2	5	0	0
Meta-Protein 342	Metagenome unknown	Complete proteome;Cytoplasm;FAD;Flavoprotein;NAD;Oxidoreductase;Reference proteome;	1.3.1.95;1.3.99.-;	;K20143;	Unknown SUPERKINGDOM	Unknown KINGDOM	Unknown PHYLUM	Unknown CLASS	Unknown ORDER	Unknown FAMILY	Unknown GENUS	Unknown SPECIES	Unknown SUBSPECIES	0	3	0	0	2	5	3	0	0	2	0	0	0	0	0	0	7	3	7	0	0	0	0	2	0	0	0	0	0	0	0	4	0	0	0	0
Meta-Protein 1542	BLAST_PGK_CALS4 Phosphoglycerate kinase OS=Caldanaerobacter subterraneus subsp. tengcongensis (strain DSM 15242 / JCM 11007 / NBRC 100824 / MB4) GN=pgk PE=3 SV=1_Q8R965	ATP-binding;Complete proteome;Cytoplasm;Glycolysis;Kinase;Nucleotide-binding;Reference proteome;Transferase;	2.7.2.3;	K00927;	Unknown SUPERKINGDOM	Unknown KINGDOM	Unknown PHYLUM	Unknown CLASS	Unknown ORDER	Unknown FAMILY	Unknown GENUS	Unknown SPECIES	Unknown SUBSPECIES	4	2	0	0	1	3	9	36	8	2	0	3	0	4	2	7	6	2	2	2	1	0	1	0	3	5	0	0	0	0	0	0	0	35	0	1
Meta-Protein 484	BLAST_OLHYD_MACCJ Oleate hydratase OS=Macrococcus caseolyticus (strain JCSC5402) GN=MCCL_0076 PE=1 SV=1_B9E972	Complete proteome;Detoxification;FAD;Fatty acid metabolism;Flavoprotein;Lipid metabolism;Lyase;Reference proteome;	4.2.1.53;	K10254;	Unknown SUPERKINGDOM	Unknown KINGDOM	Unknown PHYLUM	Unknown CLASS	Unknown ORDER	Unknown FAMILY	Unknown GENUS	Unknown SPECIES	Unknown SUBSPECIES	0	5	1	0	0	2	0	1	0	4	0	4	0	0	0	0	0	0	0	6	2	0	1	0	1	5	1	1	0	0	2	0	0	1	6	0
Meta-Protein 15614	RS13_ARCB4 30S ribosomal protein S13 OS=Arcobacter butzleri (strain RM4018) GN=rpsM PE=3 SV=1	Complete proteome;Reference proteome;Ribonucleoprotein;Ribosomal protein;RNA-binding;rRNA-binding;tRNA-binding;	;	K02952;	Bacteria	Unknown KINGDOM	Proteobacteria	Epsilonproteobacteria	Campylobacterales	Campylobacteraceae	Arcobacter	Arcobacter butzleri	Arcobacter butzleri RM4018	2	4	3	3	3	2	5	5	5	0	5	4	4	3	0	1	1	0	0	4	0	4	0	4	0	3	3	2	0	2	2	6	3	4	3	0
Meta-Protein 14799	BLAST_RL24_KOSOT 50S ribosomal protein L24 OS=Kosmotoga olearia (strain TBF 19.5.1) GN=rplX PE=3 SV=1_C5CGQ3	Complete proteome;RNA-binding;Reference proteome;Ribonucleoprotein;Ribosomal protein;rRNA-binding;	;	K02895;	Bacteria	Unknown KINGDOM	Unknown PHYLUM	Unknown CLASS	Unknown ORDER	Unknown FAMILY	Unknown GENUS	Unknown SPECIES	Unknown SUBSPECIES	0	5	7	0	0	8	5	4	6	6	0	4	5	2	0	0	1	1	1	4	0	4	0	6	0	5	2	0	0	0	0	6	2	5	6	0
Meta-Protein 13931	BLAST_NORM_THEMA Probable multidrug resistance protein NorM OS=Thermotoga maritima (strain ATCC 43589 / MSB8 / DSM 3109 / JCM 10099) GN=norM PE=3 SV=1_Q9WZS2	Antiport;Cell membrane;Complete proteome;Ion transport;Membrane;Reference proteome;Transmembrane;Transmembrane helix;Transport;	;	K03327;	Bacteria	Unknown KINGDOM	Thermotogae	Thermotogae	Thermotogales	Thermotogaceae	Thermotoga	Thermotoga maritima	Thermotoga maritima MSB8	0	1	1	1	2	2	0	3	3	0	0	0	2	5	1	1	0	0	5	0	7	3	3	1	7	0	0	3	3	1	8	1	5	2	2	3
Meta-Protein 3790	Metagenome unknown				Unknown SUPERKINGDOM	Unknown KINGDOM	Unknown PHYLUM	Unknown CLASS	Unknown ORDER	Unknown FAMILY	Unknown GENUS	Unknown SPECIES	Unknown SUBSPECIES	0	0	0	0	25	0	2	0	0	0	0	0	0	1	0	0	0	3	0	0	0	38	0	16	0	0	0	0	4	0	0	0	0	0	0	0
Meta-Protein 16535	AROC_NOSS1 Chorismate synthase OS=Nostoc sp. (strain PCC 7120 / SAG 25.82 / UTEX 2576) GN=aroC PE=3 SV=1	Amino-acid biosynthesis;Aromatic amino acid biosynthesis;Complete proteome;FAD;Flavoprotein;FMN;Lyase;NADP;Reference proteome;	4.2.3.5;	K01736;	Bacteria	Unknown KINGDOM	Cyanobacteria	Unknown CLASS	Nostocales	Nostocaceae	Nostoc	Nostoc sp. PCC 7120	Unknown SUBSPECIES	4	2	2	2	0	2	2	7	5	2	3	7	1	0	0	2	2	3	1	4	2	2	3	3	4	4	3	3	3	2	3	0	5	4	1	0
Meta-Protein 13245	Metagenome unknown				Unknown SUPERKINGDOM	Unknown KINGDOM	Unknown PHYLUM	Unknown CLASS	Unknown ORDER	Unknown FAMILY	Unknown GENUS	Unknown SPECIES	Unknown SUBSPECIES	1	4	4	5	3	4	4	2	2	0	2	3	2	2	1	3	2	1	0	3	0	0	0	4	3	1	3	3	3	1	3	1	3	2	4	0
Meta-Protein 19093	Metagenome unknown				Unknown SUPERKINGDOM	Unknown KINGDOM	Unknown PHYLUM	Unknown CLASS	Unknown ORDER	Unknown FAMILY	Unknown GENUS	Unknown SPECIES	Unknown SUBSPECIES	3	5	2	0	3	2	5	3	5	3	3	4	0	5	3	2	1	4	2	1	1	3	0	4	3	2	2	3	4	3	5	0	2	0	0	4
Meta-Protein 17212	BLAST_YQXC_BACSU Putative rRNA methyltransferase YqxC OS=Bacillus subtilis (strain 168) GN=yqxC PE=3 SV=3_P19672	Complete proteome;Methyltransferase;RNA-binding;Reference proteome;S-adenosyl-L-methionine;Transferase;rRNA processing;	2.1.1.-;	K06442;	Bacteria	Unknown KINGDOM	Firmicutes	Bacilli	Bacillales	Bacillaceae	Bacillus	Bacillus subtilis subsp. subtilis str. 168	Bacillus subtilis subsp. subtilis	1	0	1	1	4	2	2	0	0	0	0	0	2	2	0	0	1	1	0	3	14	0	6	2	2	2	3	5	2	4	2	4	0	0	1	2
Meta-Protein 21377	Metagenome unknown				Unknown SUPERKINGDOM	Unknown KINGDOM	Unknown PHYLUM	Unknown CLASS	Unknown ORDER	Unknown FAMILY	Unknown GENUS	Unknown SPECIES	Unknown SUBSPECIES	3	3	5	0	8	3	6	3	5	3	3	7	0	3	0	2	0	0	4	0	19	0	0	0	7	2	1	1	11	0	3	2	3	5	0	2
Meta-Protein 16234	BLAST_THPR_THEMA RNA 2,3-cyclic phosphodiesterase OS=Thermotoga maritima (strain ATCC 43589 / MSB8 / DSM 3109 / JCM 10099) GN=TM_1860 PE=3 SV=1_Q9X2H4	Complete proteome;Hydrolase;Reference proteome;	3.1.4.-;	K01975;	Bacteria	Unknown KINGDOM	Thermotogae	Thermotogae	Thermotogales	Thermotogaceae	Thermotoga	Thermotoga maritima	Thermotoga maritima MSB8	0	1	0	0	5	1	3	0	4	0	0	2	0	0	0	0	0	0	0	2	5	3	2	8	4	0	2	2	3	0	17	1	15	0	3	2
Meta-Protein 14055	Metagenome unknown				Unknown SUPERKINGDOM	Unknown KINGDOM	Unknown PHYLUM	Unknown CLASS	Unknown ORDER	Unknown FAMILY	Unknown GENUS	Unknown SPECIES	Unknown SUBSPECIES	2	0	0	6	4	3	1	2	2	3	3	0	1	2	2	1	0	2	1	6	5	0	5	0	4	0	3	4	3	0	4	7	5	0	2	6
Meta-Protein 19443	BLAST_QUEA_RHORT S-adenosylmethionine:tRNA ribosyltransferase-isomerase OS=Rhodospirillum rubrum (strain ATCC 11170 / ATH 1.1.1 / DSM 467 / LMG 4362 / NCIB 8255 / S1) GN=queA PE=3 SV=1_Q2RXQ9	Complete proteome;Cytoplasm;Queuosine biosynthesis;Reference proteome;S-adenosyl-L-methionine;Transferase;	2.4.99.17;	K07568;	Bacteria	Unknown KINGDOM	Proteobacteria	Alphaproteobacteria	Rhodospirillales	Rhodospirillaceae	Rhodospirillum	Rhodospirillum rubrum	Rhodospirillum rubrum ATCC 11170	3	3	2	0	3	4	1	4	3	4	2	0	0	0	2	3	0	4	4	3	3	1	6	4	3	3	4	4	4	5	5	1	2	0	0	0
Meta-Protein 1662	Metagenome unknown	Complete proteome;RNA-binding;Reference proteome;Ribonucleoprotein;Ribosomal protein;rRNA-binding;	;	K02906;	Unknown SUPERKINGDOM	Unknown KINGDOM	Unknown PHYLUM	Unknown CLASS	Unknown ORDER	Unknown FAMILY	Unknown GENUS	Unknown SPECIES	Unknown SUBSPECIES	29	11	0	0	5	4	8	0	13	0	4	6	2	3	3	6	0	1	0	1	0	0	0	0	6	2	0	5	1	9	0	0	0	6	0	0
Meta-Protein 1789	Metagenome unknown	3D-structure;Cobalamin;Cobalt;Direct protein sequencing;Isomerase;Metal-binding;	5.4.99.2;	;	Unknown SUPERKINGDOM	Unknown KINGDOM	Unknown PHYLUM	Unknown CLASS	Unknown ORDER	Unknown FAMILY	Unknown GENUS	Unknown SPECIES	Unknown SUBSPECIES	0	1	13	0	0	0	18	0	0	0	0	0	0	0	0	0	0	0	0	0	0	0	0	0	0	13	0	2	0	56	0	0	0	4	0	0
Meta-Protein 19480	Metagenome unknown				Unknown SUPERKINGDOM	Unknown KINGDOM	Unknown PHYLUM	Unknown CLASS	Unknown ORDER	Unknown FAMILY	Unknown GENUS	Unknown SPECIES	Unknown SUBSPECIES	7	0	0	0	8	0	4	2	0	2	0	1	0	4	2	5	1	0	3	0	9	3	6	9	4	3	4	3	6	4	6	2	4	0	0	3
Meta-Protein 1697	Metagenome unknown	3D-structure;Acetylation;Acyltransferase;Carbohydrate metabolism;Complete proteome;Cytoplasm;Direct protein sequencing;Glucose metabolism;Organic radical;Reference proteome;Transferase;	;2.3.1.54;	;K00656;K06866;	Unknown SUPERKINGDOM	Unknown KINGDOM	Unknown PHYLUM	Unknown CLASS	Unknown ORDER	Unknown FAMILY	Unknown GENUS	Unknown SPECIES	Unknown SUBSPECIES	0	19	0	1	8	6	33	6	3	4	0	0	10	26	0	0	0	0	0	0	0	0	7	0	0	0	0	0	0	0	0	0	22	0	20	0
Meta-Protein 1398	BLAST_G3P_STRP8 Glyceraldehyde-3-phosphate dehydrogenase OS=Streptococcus pyogenes serotype M18 (strain MGAS8232) GN=gap PE=3 SV=2_P68777	Complete proteome;Cytoplasm;Direct protein sequencing;Glycolysis;NAD;Nucleotide-binding;Oxidoreductase;Reference proteome;	1.2.1.12;	K00134;	Unknown SUPERKINGDOM	Unknown KINGDOM	Unknown PHYLUM	Unknown CLASS	Unknown ORDER	Unknown FAMILY	Unknown GENUS	Unknown SPECIES	Unknown SUBSPECIES	0	0	2	0	0	0	0	0	9	0	0	0	0	0	0	0	0	0	0	0	26	0	0	0	6	0	0	0	0	24	0	0	2	0	0	3
Meta-Protein 19444	Metagenome unknown				Unknown SUPERKINGDOM	Unknown KINGDOM	Unknown PHYLUM	Unknown CLASS	Unknown ORDER	Unknown FAMILY	Unknown GENUS	Unknown SPECIES	Unknown SUBSPECIES	3	1	3	0	3	4	2	4	3	5	3	3	0	2	2	2	0	4	2	2	2	3	3	3	3	3	4	4	3	5	4	4	2	0	0	0
Meta-Protein 4231	Metagenome unknown				Unknown SUPERKINGDOM	Unknown KINGDOM	Unknown PHYLUM	Unknown CLASS	Unknown ORDER	Unknown FAMILY	Unknown GENUS	Unknown SPECIES	Unknown SUBSPECIES	0	0	0	0	0	3	0	0	0	0	0	0	0	0	0	0	0	1	0	0	0	57	0	0	0	0	0	0	0	0	0	0	0	0	0	0
Meta-Protein 6331	Metagenome unknown				Unknown SUPERKINGDOM	Unknown KINGDOM	Unknown PHYLUM	Unknown CLASS	Unknown ORDER	Unknown FAMILY	Unknown GENUS	Unknown SPECIES	Unknown SUBSPECIES	0	0	0	0	0	0	0	1	0	0	0	0	0	0	0	0	0	0	0	0	0	0	0	0	0	0	6	0	50	0	0	0	56	4	0	0
Meta-Protein 1032	BLAST_LIPO_BACSU Lipoprotein LipO OS=Bacillus subtilis (strain 168) GN=lipO PE=1 SV=1_P37966	Cell membrane;Complete proteome;Lipoprotein;Membrane;Palmitate;Reference proteome;Signal;	;	K17318;	Unknown SUPERKINGDOM	Unknown KINGDOM	Unknown PHYLUM	Unknown CLASS	Unknown ORDER	Unknown FAMILY	Unknown GENUS	Unknown SPECIES	Unknown SUBSPECIES	0	0	3	0	0	10	0	2	24	0	0	2	1	0	0	0	4	0	0	1	0	0	0	4	0	13	0	0	0	0	0	12	0	28	5	0
Meta-Protein 19099	Metagenome unknown				Unknown SUPERKINGDOM	Unknown KINGDOM	Unknown PHYLUM	Unknown CLASS	Unknown ORDER	Unknown FAMILY	Unknown GENUS	Unknown SPECIES	Unknown SUBSPECIES	5	5	4	0	3	3	5	3	4	3	2	4	0	2	1	1	1	0	2	0	5	3	0	4	4	2	4	6	5	3	5	0	4	0	0	4
Meta-Protein 4206	Metagenome unknown				Unknown SUPERKINGDOM	Unknown KINGDOM	Unknown PHYLUM	Unknown CLASS	Unknown ORDER	Unknown FAMILY	Unknown GENUS	Unknown SPECIES	Unknown SUBSPECIES	0	0	0	0	11	0	16	0	0	0	0	0	0	0	0	0	0	8	0	0	0	46	0	2	0	0	0	0	10	23	0	14	0	0	0	0
Meta-Protein 281	BLAST_DGAL_SALTY D-galactose-binding periplasmic protein OS=Salmonella typhimurium (strain LT2 / SGSC1412 / ATCC 700720) GN=mglB PE=1 SV=2_P23905	3D-structure;Calcium;Chemotaxis;Complete proteome;Direct protein sequencing;Metal-binding;Periplasm;Reference proteome;Signal;Sugar transport;Transport;	;	;K10540;	Unknown SUPERKINGDOM	Unknown KINGDOM	Unknown PHYLUM	Unknown CLASS	Unknown ORDER	Unknown FAMILY	Unknown GENUS	Unknown SPECIES	Unknown SUBSPECIES	0	0	3	0	2	5	0	5	19	0	7	10	0	0	0	0	2	0	0	0	0	0	0	0	0	0	14	0	0	2	0	1	0	0	10	0
Meta-Protein 1692	BLAST_PCCB_HALMT Propionyl-CoA carboxylase, carboxyltransferase subunit OS=Haloferax mediterranei (strain ATCC 33500 / DSM 1411 / JCM 8866 / NBRC 14739 / NCIMB 2177 / R-4) GN=pccB PE=1 SV=1_I3R7F1	ATP-binding;Acetylation;Complete proteome;Ligase;Lyase;Mitochondrion;Nucleotide-binding;Phosphoprotein;Reference proteome;Transit peptide;	6.4.1.3;	K01966;K19312;	Unknown SUPERKINGDOM	Unknown KINGDOM	Unknown PHYLUM	Unknown CLASS	Unknown ORDER	Unknown FAMILY	Unknown GENUS	Unknown SPECIES	Unknown SUBSPECIES	0	17	5	0	2	2	29	0	0	0	0	0	0	0	1	0	0	4	0	1	0	6	0	0	0	3	0	0	0	7	0	0	0	1	0	0
Meta-Protein 3226	Metagenome unknown				Unknown SUPERKINGDOM	Unknown KINGDOM	Unknown PHYLUM	Unknown CLASS	Unknown ORDER	Unknown FAMILY	Unknown GENUS	Unknown SPECIES	Unknown SUBSPECIES	0	0	0	0	0	10	33	0	0	0	0	0	0	2	0	0	0	22	0	0	0	25	0	4	0	0	0	0	12	3	0	0	0	0	4	0
Meta-Protein 2716	BLAST_PCKG_ACIBT Phosphoenolpyruvate carboxykinase [GTP] OS=Acinetobacter baumannii (strain ATCC 17978 / CIP 53.77 / LMG 1025 / NCDC KC755 / 5377) GN=pckG PE=3 SV=2_A3M840	3D-structure;Acetylation;Complete proteome;Cytoplasm;Decarboxylase;Direct protein sequencing;GTP-binding;Gluconeogenesis;Lyase;Manganese;Metal-binding;Mitochondrion;Nucleotide-binding;Phosphoprotein;Reference proteome;Transit peptide;Ubl conjugation;	4.1.1.32;	K01596;	Unknown SUPERKINGDOM	Unknown KINGDOM	Unknown PHYLUM	Unknown CLASS	Unknown ORDER	Unknown FAMILY	Unknown GENUS	Unknown SPECIES	Unknown SUBSPECIES	0	5	0	0	0	1	0	30	4	0	0	2	0	0	1	1	9	1	0	0	2	16	0	1	1	0	0	0	0	2	0	0	0	56	0	0
Meta-Protein 24291	Metagenome unknown				Unknown SUPERKINGDOM	Unknown KINGDOM	Unknown PHYLUM	Unknown CLASS	Unknown ORDER	Unknown FAMILY	Unknown GENUS	Unknown SPECIES	Unknown SUBSPECIES	0	0	0	0	0	0	0	0	0	0	0	0	0	0	0	0	0	0	0	1	1	0	4	29	0	0	4	4	6	1	0	0	2	0	0	1
Meta-Protein 12999	BLAST_GSA_CAMJD Glutamate-1-semialdehyde 2,1-aminomutase OS=Campylobacter jejuni subsp. doylei (strain ATCC BAA-1458 / RM4099 / 269.97) GN=hemL PE=3 SV=1_A7H3N1	Complete proteome;Cytoplasm;Isomerase;Porphyrin biosynthesis;Pyridoxal phosphate;	5.4.3.8;	K01845;	Bacteria	Unknown KINGDOM	Proteobacteria	Epsilonproteobacteria	Campylobacterales	Campylobacteraceae	Campylobacter	Campylobacter jejuni subsp. doylei 269.97	Campylobacter jejuni subsp. doylei	0	3	8	0	0	0	0	0	0	0	0	0	0	0	0	0	0	6	1	0	0	4	3	4	0	0	0	0	0	0	0	0	3	0	2	0
Meta-Protein 205	BLAST_LIPO_BACSU Lipoprotein LipO OS=Bacillus subtilis (strain 168) GN=lipO PE=1 SV=1_P37966	Cell membrane;Complete proteome;Lipoprotein;Membrane;Palmitate;Reference proteome;Signal;	;	K17318;	Unknown SUPERKINGDOM	Unknown KINGDOM	Unknown PHYLUM	Unknown CLASS	Unknown ORDER	Unknown FAMILY	Unknown GENUS	Unknown SPECIES	Unknown SUBSPECIES	0	0	0	0	0	0	0	0	0	0	0	13	0	0	0	4	1	0	0	0	0	0	0	10	0	8	0	0	0	0	0	0	0	0	2	0
Meta-Protein 87	BLAST_TPIS_PANTR Triosephosphate isomerase OS=Pan troglodytes GN=TPI1 PE=2 SV=2_P60175	3D-structure;Acetylation;Allergen;Alternative promoter usage;Alternative splicing;Calvin cycle;Chloroplast;Complete proteome;Cytoplasm;Direct protein sequencing;Disease mutation;Gluconeogenesis;Glycolysis;Glycosome;Hereditary hemolytic anemia;Isomerase;Isopeptide bond;Methylation;Nitration;Pentose shunt;Peroxisome;Phosphoprotein;Plastid;Polymorphism;Reference proteome;Transit peptide;Ubl conjugat…	5.3.1.1;	;K01803;	Unknown SUPERKINGDOM	Unknown KINGDOM	Unknown PHYLUM	Unknown CLASS	Unknown ORDER	Unknown FAMILY	Unknown GENUS	Unknown SPECIES	Unknown SUBSPECIES	0	0	0	0	0	0	3	1	0	0	0	2	0	1	0	0	0	0	0	0	0	0	1	0	1	1	0	1	0	0	30	0	28	2	0	0
Meta-Protein 1069	Metagenome unknown	Cell membrane;Complete proteome;Lipoprotein;Membrane;Palmitate;Reference proteome;Signal;	;	K17318;	Unknown SUPERKINGDOM	Unknown KINGDOM	Unknown PHYLUM	Unknown CLASS	Unknown ORDER	Unknown FAMILY	Unknown GENUS	Unknown SPECIES	Unknown SUBSPECIES	14	20	2	0	7	15	0	2	0	16	0	0	0	0	0	0	7	0	0	0	0	0	0	0	0	2	0	0	0	6	0	3	0	0	14	0
Meta-Protein 472	BLAST_CRT_CLODI Short-chain-enoyl-CoA hydratase (Fragment) OS=Clostridioides difficile GN=crt PE=3 SV=1_P45361	Fatty acid metabolism;Lipid metabolism;Lyase;	4.2.1.150;	;	Bacteria	Unknown KINGDOM	Firmicutes	Clostridia	Clostridiales	Peptostreptococcaceae	Unknown GENUS	[Clostridium] difficile	Unknown SUBSPECIES	0	7	4	0	0	9	6	6	11	6	0	6	8	0	0	2	6	1	1	2	0	2	0	2	0	7	0	0	0	0	0	4	0	7	3	0
Meta-Protein 15611	BLAST_O16G_BACF5 Oligo-1,6-glucosidase OS=Bacillus sp. (strain F5) GN=malL PE=1 SV=2_P29093	3D-structure;Calcium;Complete proteome;Cytoplasm;Direct protein sequencing;Glycosidase;Hydrolase;Metal-binding;Reference proteome;	3.2.1.10;	;K01182;	Bacteria	Unknown KINGDOM	Firmicutes	Bacilli	Bacillales	Bacillaceae	Bacillus	Unknown SPECIES	Unknown SUBSPECIES	2	4	2	6	4	2	6	3	5	0	3	4	1	4	0	0	1	0	1	2	0	3	0	3	0	0	3	1	0	2	2	6	2	5	4	0
Meta-Protein 979	BLAST_SLAP_LYSSH Surface-layer 125 kDa protein OS=Lysinibacillus sphaericus PE=3 SV=1_P38537	Cell wall;Repeat;S-layer;Secreted;Signal;	;	;	Unknown SUPERKINGDOM	Unknown KINGDOM	Unknown PHYLUM	Unknown CLASS	Unknown ORDER	Unknown FAMILY	Unknown GENUS	Unknown SPECIES	Unknown SUBSPECIES	0	4	3	0	0	0	0	2	0	0	0	0	2	0	0	1	0	0	0	8	0	2	1	0	0	7	4	2	0	0	0	0	0	71	8	0
Meta-Protein 13244	Metagenome unknown				Unknown SUPERKINGDOM	Unknown KINGDOM	Unknown PHYLUM	Unknown CLASS	Unknown ORDER	Unknown FAMILY	Unknown GENUS	Unknown SPECIES	Unknown SUBSPECIES	3	4	3	4	2	1	6	2	3	0	2	1	0	3	0	0	4	1	3	2	0	0	0	1	4	2	2	3	3	2	3	6	2	2	2	0
Meta-Protein 2730	Metagenome unknown	Complete proteome;Methylation;RNA-binding;Reference proteome;Ribonucleoprotein;Ribosomal protein;rRNA-binding;	;	K02867;	Unknown SUPERKINGDOM	Unknown KINGDOM	Unknown PHYLUM	Unknown CLASS	Unknown ORDER	Unknown FAMILY	Unknown GENUS	Unknown SPECIES	Unknown SUBSPECIES	0	0	0	1	0	0	0	1	2	0	0	3	0	3	1	5	0	0	2	0	0	0	17	0	22	0	2	0	9	0	0	2	6	7	0	21
Meta-Protein 1270	Metagenome unknown	Complete proteome;Reference proteome;Thiamine pyrophosphate;Transferase;	2.2.1.1;	K00615;	Unknown SUPERKINGDOM	Unknown KINGDOM	Unknown PHYLUM	Unknown CLASS	Unknown ORDER	Unknown FAMILY	Unknown GENUS	Unknown SPECIES	Unknown SUBSPECIES	10	1	0	0	1	2	1	4	9	5	0	13	0	1	0	4	3	1	4	0	0	0	0	0	0	17	0	0	0	0	0	0	1	7	0	0
Meta-Protein 14414	BLAST_ILL1_ORYSI IAA-amino acid hydrolase ILR1-like 1 OS=Oryza sativa subsp. indica GN=ILL1 PE=2 SV=1_Q84XG9	Complete proteome;Endoplasmic reticulum;Hydrolase;Reference proteome;Signal;	3.5.1.-;	;K21604;	Eukaryota	Viridiplantae	Streptophyta	Liliopsida	Poales	Poaceae	Oryza	Oryza sativa	Unknown SUBSPECIES	3	2	2	3	2	3	4	3	4	4	4	3	0	3	0	1	4	1	1	4	0	1	3	2	1	3	3	0	0	2	0	3	3	3	4	0
Meta-Protein 160	BLAST_RL15_AGARV 50S ribosomal protein L15 OS=Agathobacter rectalis (strain ATCC 33656 / DSM 3377 / JCM 17463 / KCTC 5835 / VPI 0990) GN=rplO PE=3 SV=1_C4ZBT7	Complete proteome;RNA-binding;Reference proteome;Ribonucleoprotein;Ribosomal protein;rRNA-binding;	;	K02876;	Bacteria	Unknown KINGDOM	Firmicutes	Clostridia	Clostridiales	Unknown FAMILY	Unknown GENUS	Unknown SPECIES	Unknown SUBSPECIES	0	8	0	0	0	7	0	7	5	19	4	4	0	5	1	0	5	2	1	2	0	2	0	1	0	8	2	0	2	0	0	0	1	2	0	1
Meta-Protein 1096	BLAST_MALE_PYRAB Maltotriose-binding protein OS=Pyrococcus abyssi (strain GE5 / Orsay) GN=malE PE=3 SV=1_Q9V297	3D-structure;Acetylation;Cell membrane;Complete proteome;Lipoprotein;Membrane;Palmitate;Periplasm;Reference proteome;Signal;Sugar transport;Transport;	;	K10108;K10117;K15770;K17315;	Unknown SUPERKINGDOM	Unknown KINGDOM	Unknown PHYLUM	Unknown CLASS	Unknown ORDER	Unknown FAMILY	Unknown GENUS	Unknown SPECIES	Unknown SUBSPECIES	0	5	0	3	23	0	27	0	23	0	0	0	1	9	0	0	2	25	0	0	0	0	6	0	0	0	0	3	0	0	0	0	30	0	0	0
Meta-Protein 15328	Metagenome unknown				Unknown SUPERKINGDOM	Unknown KINGDOM	Unknown PHYLUM	Unknown CLASS	Unknown ORDER	Unknown FAMILY	Unknown GENUS	Unknown SPECIES	Unknown SUBSPECIES	5	1	1	0	8	4	3	3	4	2	3	2	0	3	0	3	1	0	2	0	15	0	1	2	9	1	0	2	22	0	4	1	3	1	0	2
Meta-Protein 13587	BLAST_BGAL_LACSK Beta-galactosidase large subunit OS=Lactobacillus sakei GN=lacL PE=3 SV=1_Q48846	Glycosidase;Hydrolase;	3.2.1.23;	;	Bacteria	Unknown KINGDOM	Firmicutes	Bacilli	Lactobacillales	Lactobacillaceae	Lactobacillus	Lactobacillus sakei	Unknown SUBSPECIES	2	0	2	1	1	1	3	1	2	1	1	0	0	1	0	0	0	2	0	3	3	3	3	4	4	0	3	4	4	6	0	4	2	0	3	2
Meta-Protein 417	BLAST_RS12_LACP7 30S ribosomal protein S12 OS=Lachnoclostridium phytofermentans (strain ATCC 700394 / DSM 18823 / ISDg) GN=rpsL PE=3 SV=1_A9KRZ1	Complete proteome;Methylation;RNA-binding;Reference proteome;Ribonucleoprotein;Ribosomal protein;rRNA-binding;tRNA-binding;	;	K02950;	Bacteria	Unknown KINGDOM	Firmicutes	Clostridia	Clostridiales	Clostridiaceae	Clostridium	Clostridium phytofermentans	Clostridium phytofermentans ISDg	4	6	2	2	2	8	0	7	1	3	1	8	5	0	1	0	5	0	0	0	0	0	3	0	2	1	2	2	0	6	0	6	0	2	7	1
Meta-Protein 1334	FRIL_PIG Ferritin light chain (Fragment) OS=Sus scrofa GN=FTL PE=1 SV=1	3D-structure;Acetylation;Cell adhesion;Cell membrane;Cell projection;Chemotaxis;Coiled coil;Complete proteome;Cytoplasm;Cytoskeleton;Differentiation;Direct protein sequencing;Hearing;Iron;Iron storage;Membrane;Metal-binding;Myogenesis;Phosphoprotein;Reference proteome;Signal transduction inhibitor;	;	;K13625;	Eukaryota	Metazoa	Chordata	Mammalia	Unknown ORDER	Unknown FAMILY	Unknown GENUS	Unknown SPECIES	Unknown SUBSPECIES	0	0	0	0	0	0	0	0	0	0	0	0	0	0	0	0	0	0	0	0	0	0	0	0	0	0	0	0	0	0	0	0	0	0	0	0
Meta-Protein 421	BLAST_KV401_HUMAN Immunoglobulin kappa variable 4-1 OS=Homo sapiens GN=IGKV4-1 PE=1 SV=1_P06312	3D-structure;Adaptive immunity;Cell membrane;Complete proteome;Direct protein sequencing;Disulfide bond;Immunity;Immunoglobulin V region;Immunoglobulin domain;Membrane;Polymorphism;Reference proteome;Secreted;Signal;	;	;	Eukaryota	Metazoa	Chordata	Mammalia	Primates	Hominidae	Homo	Homo sapiens	Unknown SUBSPECIES	0	0	0	0	0	0	4	0	4	0	0	0	0	0	0	0	0	0	0	0	8	0	5	9	8	0	1	2	4	4	5	1	6	0	0	4
Meta-Protein 13971	BLAST_TTDB_SHIFL L(+)-tartrate dehydratase subunit beta OS=Shigella flexneri GN=ttdB PE=3 SV=1_P0AC37	Complete proteome;Lyase;Reference proteome;	4.2.1.32;	K03780;	Bacteria	Unknown KINGDOM	Proteobacteria	Gammaproteobacteria	Enterobacteriales	Enterobacteriaceae	Unknown GENUS	Unknown SPECIES	Unknown SUBSPECIES	2	2	4	3	2	3	3	3	3	3	2	2	5	3	2	2	2	2	2	2	2	3	1	3	3	1	0	3	2	0	4	3	1	0	5	5
Meta-Protein 19287	Metagenome unknown				Unknown SUPERKINGDOM	Unknown KINGDOM	Unknown PHYLUM	Unknown CLASS	Unknown ORDER	Unknown FAMILY	Unknown GENUS	Unknown SPECIES	Unknown SUBSPECIES	2	0	0	0	0	0	0	0	0	0	2	0	0	0	0	1	0	0	1	0	2	4	6	3	5	0	2	4	4	0	2	4	4	0	0	1
Meta-Protein 3904	BLAST_SUSC_BACTN TonB-dependent receptor SusC OS=Bacteroides thetaiotaomicron (strain ATCC 29148 / DSM 2079 / NCTC 10582 / E50 / VPI-5482) GN=susC PE=1 SV=1_Q8A1G1	Carbohydrate metabolism;Cell outer membrane;Complete proteome;Membrane;Receptor;Reference proteome;Signal;TonB box;Transmembrane;Transmembrane beta strand;Transport;	;	K21573;	Unknown SUPERKINGDOM	Unknown KINGDOM	Unknown PHYLUM	Unknown CLASS	Unknown ORDER	Unknown FAMILY	Unknown GENUS	Unknown SPECIES	Unknown SUBSPECIES	0	0	0	0	16	0	0	0	0	0	0	0	0	0	0	0	0	8	0	0	0	34	0	7	0	0	0	0	2	0	0	0	0	0	0	0
Meta-Protein 451	BLAST_PUR9_BACTN Bifunctional purine biosynthesis protein PurH OS=Bacteroides thetaiotaomicron (strain ATCC 29148 / DSM 2079 / NCTC 10582 / E50 / VPI-5482) GN=purH PE=3 SV=1_Q8A155	Complete proteome;Hydrolase;Multifunctional enzyme;Purine biosynthesis;Reference proteome;Transferase;	2.1.2.3;3.5.4.10;	K00602;	Unknown SUPERKINGDOM	Unknown KINGDOM	Unknown PHYLUM	Unknown CLASS	Unknown ORDER	Unknown FAMILY	Unknown GENUS	Unknown SPECIES	Unknown SUBSPECIES	0	0	2	0	0	2	8	0	0	0	0	2	0	2	1	1	0	4	0	7	0	6	3	8	2	6	0	0	0	0	0	2	0	13	4	0
Meta-Protein 50815	Metagenome unknown				Unknown SUPERKINGDOM	Unknown KINGDOM	Unknown PHYLUM	Unknown CLASS	Unknown ORDER	Unknown FAMILY	Unknown GENUS	Unknown SPECIES	Unknown SUBSPECIES	0	0	4	0	0	0	0	0	1	0	0	0	0	0	0	0	0	0	0	0	0	11	0	0	0	2	0	0	59	2	0	0	16	16	0	0
Meta-Protein 13972	RAD5_KLULA DNA repair protein RAD5 OS=Kluyveromyces lactis (strain ATCC 8585 / CBS 2359 / DSM 70799 / NBRC 1267 / NRRL Y-1140 / WM37) GN=RAD5 PE=3 SV=1	ATP-binding;Complete proteome;Cytoplasm;DNA damage;DNA repair;DNA-binding;Helicase;Hydrolase;Metal-binding;Nucleotide-binding;Nucleus;Reference proteome;Zinc;Zinc-finger;	3.6.4.-;	K15505;	Eukaryota	Fungi	Ascomycota	Saccharomycetes	Saccharomycetales	Saccharomycetaceae	Kluyveromyces	Kluyveromyces lactis	Kluyveromyces lactis NRRL Y-1140	3	2	4	2	3	3	3	4	3	3	4	3	3	5	2	1	1	2	2	2	0	2	2	1	2	2	1	4	0	3	4	4	1	0	5	4
Meta-Protein 13968	BLAST_Y1812_MYCTU NADH dehydrogenase-like protein Rv1812c OS=Mycobacterium tuberculosis (strain ATCC 25618 / H37Rv) GN=Rv1812c PE=1 SV=1_P9WJJ1	Complete proteome;FAD;Flavoprotein;Oxidoreductase;Reference proteome;	1.6.-.-;	K03885;	Bacteria	Unknown KINGDOM	Actinobacteria	Actinobacteria	Actinomycetales	Mycobacteriaceae	Mycobacterium	Mycobacterium tuberculosis	Unknown SUBSPECIES	2	2	2	3	2	3	3	2	3	3	4	3	4	3	1	2	1	1	0	2	2	2	5	2	3	2	3	4	5	0	4	3	1	0	6	3
Meta-Protein 1582	Metagenome unknown	Complete proteome;Direct protein sequencing;Glycosidase;Hydrolase;Magnesium;Metal-binding;Plasmid;Reference proteome;Sodium;	3.2.1.23;	;K01190;	Unknown SUPERKINGDOM	Unknown KINGDOM	Unknown PHYLUM	Unknown CLASS	Unknown ORDER	Unknown FAMILY	Unknown GENUS	Unknown SPECIES	Unknown SUBSPECIES	6	6	0	0	1	0	0	2	0	0	1	4	0	0	2	2	0	0	1	0	3	0	0	0	12	0	0	1	0	2	0	0	0	8	0	0
Meta-Protein 614	BLAST_HNS_SALT1 DNA-binding protein H-NS OS=Salmonella typhimurium (strain 14028s / SGSC 2262) GN=hns PE=1 SV=1_A0A0F6B244	3D-structure;Coiled coil;Complete proteome;Cytoplasm;DNA-binding;Direct protein sequencing;RNA-binding;Reference proteome;Repressor;Stress response;Transcription;Transcription regulation;Translation regulation;Virulence;	;	;K03746;	Unknown SUPERKINGDOM	Unknown KINGDOM	Unknown PHYLUM	Unknown CLASS	Unknown ORDER	Unknown FAMILY	Unknown GENUS	Unknown SPECIES	Unknown SUBSPECIES	0	0	0	0	0	0	0	1	0	0	4	0	0	0	0	0	0	0	0	0	0	24	0	0	3	0	0	0	0	0	0	0	0	0	0	15
Meta-Protein 1200	BLAST_FEOB_HELPJ Fe(2+) transporter FeoB OS=Helicobacter pylori (strain J99 / ATCC 700824) GN=feoB PE=3 SV=1_Q9ZLF3	3D-structure;ATP-binding;Cell inner membrane;Cell membrane;Complete proteome;GTP-binding;Ion transport;Iron;Iron transport;Membrane;Nucleotide-binding;Reference proteome;Repeat;Ribosome biogenesis;Transmembrane;Transmembrane helix;Transport;	;	;K03977;K04759;	Unknown SUPERKINGDOM	Unknown KINGDOM	Unknown PHYLUM	Unknown CLASS	Unknown ORDER	Unknown FAMILY	Unknown GENUS	Unknown SPECIES	Unknown SUBSPECIES	4	4	0	1	2	0	7	2	33	0	0	1	0	5	0	0	11	0	2	4	0	7	0	0	0	24	0	0	1	1	0	0	1	4	7	0
Meta-Protein 18407	Metagenome unknown				Unknown SUPERKINGDOM	Unknown KINGDOM	Unknown PHYLUM	Unknown CLASS	Unknown ORDER	Unknown FAMILY	Unknown GENUS	Unknown SPECIES	Unknown SUBSPECIES	1	0	0	1	1	0	3	1	1	0	1	1	2	3	2	0	0	0	3	2	15	1	1	3	1	1	3	2	6	0	1	8	2	1	11	9
Meta-Protein 4217	Metagenome unknown				Unknown SUPERKINGDOM	Unknown KINGDOM	Unknown PHYLUM	Unknown CLASS	Unknown ORDER	Unknown FAMILY	Unknown GENUS	Unknown SPECIES	Unknown SUBSPECIES	0	0	0	0	0	15	14	0	0	0	0	2	0	0	0	0	0	22	0	0	0	29	0	0	0	0	0	0	5	0	0	0	2	0	5	0
Meta-Protein 1762	BLAST_YVZB_BACSU Putative flagellin YvzB OS=Bacillus subtilis (strain 168) GN=yvzB PE=1 SV=1_O34366	Bacterial flagellum;Cell wall;Complete proteome;Direct protein sequencing;Reference proteome;Secreted;	;	;K02406;	Bacteria	Unknown KINGDOM	Firmicutes	Unknown CLASS	Unknown ORDER	Unknown FAMILY	Unknown GENUS	Unknown SPECIES	Unknown SUBSPECIES	0	0	27	0	0	0	0	0	0	0	0	0	0	0	0	0	0	0	0	0	0	0	0	0	0	0	0	0	0	6	0	0	0	0	0	0
Meta-Protein 23951	EFTS_GRAFK Elongation factor Ts OS=Gramella forsetii (strain KT0803) GN=tsf PE=3 SV=1	Complete proteome;Cytoplasm;Elongation factor;Protein biosynthesis;Reference proteome;	;	K02357;	Bacteria	Unknown KINGDOM	Bacteroidetes	Flavobacteriia	Flavobacteriales	Flavobacteriaceae	Gramella	Gramella forsetii	Gramella forsetii KT0803	4	0	0	2	0	1	3	0	6	0	0	0	0	1	0	0	0	0	0	0	5	0	5	10	12	0	3	5	6	6	4	5	4	0	0	4
Meta-Protein 13289	BLAST_YOAA_BACSU Uncharacterized N-acetyltransferase YoaA OS=Bacillus subtilis (strain 168) GN=yoaA PE=3 SV=2_O34569	Acyltransferase;Complete proteome;Reference proteome;Transferase;	2.3.1.-;	K03790;	Bacteria	Unknown KINGDOM	Firmicutes	Bacilli	Bacillales	Bacillaceae	Bacillus	Bacillus subtilis subsp. subtilis str. 168	Bacillus subtilis subsp. subtilis	0	1	1	3	0	0	4	0	3	0	3	2	1	2	0	2	1	0	1	1	0	0	6	5	3	0	4	5	1	0	0	5	0	1	2	1
Meta-Protein 13545	Metagenome unknown				Unknown SUPERKINGDOM	Unknown KINGDOM	Unknown PHYLUM	Unknown CLASS	Unknown ORDER	Unknown FAMILY	Unknown GENUS	Unknown SPECIES	Unknown SUBSPECIES	3	4	1	4	2	4	4	4	6	4	2	5	5	3	2	3	3	2	3	5	0	0	5	0	1	4	2	2	0	6	0	2	3	3	1	2
Meta-Protein 328	BLAST_RL16_DESHY 50S ribosomal protein L16 OS=Desulfitobacterium hafniense (strain Y51) GN=rplP PE=3 SV=1_Q250M5	3D-structure;Antibiotic resistance;Chloroplast;Complete proteome;Direct protein sequencing;Methylation;Plastid;RNA-binding;Reference proteome;Ribonucleoprotein;Ribosomal protein;rRNA-binding;tRNA-binding;	;	;K02878;	Unknown SUPERKINGDOM	Unknown KINGDOM	Unknown PHYLUM	Unknown CLASS	Unknown ORDER	Unknown FAMILY	Unknown GENUS	Unknown SPECIES	Unknown SUBSPECIES	10	9	2	0	0	6	0	3	5	9	0	2	6	3	0	0	6	2	2	0	0	0	3	0	0	7	1	0	0	0	4	4	0	14	4	0
Meta-Protein 3460	RL5_ECO55 50S ribosomal protein L5 OS=Escherichia coli (strain 55989 / EAEC) GN=rplE PE=3 SV=1	3D-structure;Acetylation;Complete proteome;Direct protein sequencing;RNA-binding;Reference proteome;Ribonucleoprotein;Ribosomal protein;rRNA-binding;tRNA-binding;	;	;K02931;	Unknown SUPERKINGDOM	Unknown KINGDOM	Unknown PHYLUM	Unknown CLASS	Unknown ORDER	Unknown FAMILY	Unknown GENUS	Unknown SPECIES	Unknown SUBSPECIES	0	0	0	0	0	0	0	1	0	0	0	0	0	0	0	0	0	0	1	0	0	39	0	1	6	0	0	0	0	0	0	0	0	0	0	32
Meta-Protein 12814	BLAST_ADDB_NATTJ ATP-dependent helicase/deoxyribonuclease subunit B OS=Natranaerobius thermophilus (strain ATCC BAA-1301 / DSM 18059 / JW/NM-WN-LF) GN=addB PE=3 SV=1_B2A611	4Fe-4S;ATP-binding;Complete proteome;DNA damage;DNA repair;Exonuclease;Hydrolase;Iron;Iron-sulfur;Metal-binding;Nuclease;Nucleotide-binding;Reference proteome;	3.1.-.-;3.6.4.12;	K16899;	Bacteria	Unknown KINGDOM	Firmicutes	Clostridia	Natranaerobiales	Natranaerobiaceae	Natranaerobius	Natranaerobius thermophilus	Natranaerobius thermophilus JW/NM-WN-LF	2	7	4	3	3	3	4	3	2	3	2	4	0	2	0	1	3	1	0	1	4	0	2	2	2	2	1	2	0	4	3	3	1	2	2	3
Meta-Protein 15252	BLAST_PSF1_BACPU 4-phosphopantetheinyl transferase psf-1 OS=Bacillus pumilus GN=psf-1 PE=3 SV=1_P55810	Antibiotic biosynthesis;Magnesium;Metal-binding;Transferase;	2.7.8.-;	;	Bacteria	Unknown KINGDOM	Firmicutes	Bacilli	Bacillales	Bacillaceae	Bacillus	Bacillus pumilus	Unknown SUBSPECIES	3	2	3	1	3	3	4	3	1	3	4	0	3	1	1	0	4	3	1	1	4	2	3	3	4	1	2	0	3	0	5	1	10	3	6	3
Meta-Protein 2559	BLAST_FTHS_AGARV Formate--tetrahydrofolate ligase OS=Agathobacter rectalis (strain ATCC 33656 / DSM 3377 / JCM 17463 / KCTC 5835 / VPI 0990) GN=fhs PE=3 SV=1_C4ZBG8	ATP-binding;Complete proteome;Ligase;Nucleotide-binding;One-carbon metabolism;Reference proteome;	6.3.4.3;	K01938;	Unknown SUPERKINGDOM	Unknown KINGDOM	Unknown PHYLUM	Unknown CLASS	Unknown ORDER	Unknown FAMILY	Unknown GENUS	Unknown SPECIES	Unknown SUBSPECIES	5	4	1	1	2	4	4	5	4	2	2	4	3	4	3	5	2	4	3	2	0	2	2	0	2	3	1	0	0	5	0	0	5	4	3	0
Meta-Protein 1359	Metagenome unknown	Complete proteome;Reference proteome;Ribonucleoprotein;Ribosomal protein;	;	K02996;	Unknown SUPERKINGDOM	Unknown KINGDOM	Unknown PHYLUM	Unknown CLASS	Unknown ORDER	Unknown FAMILY	Unknown GENUS	Unknown SPECIES	Unknown SUBSPECIES	21	2	0	0	2	2	0	6	0	6	0	6	0	6	4	6	3	2	1	0	0	0	4	0	0	6	0	0	0	1	0	0	0	3	2	4
Meta-Protein 4205	Metagenome unknown				Unknown SUPERKINGDOM	Unknown KINGDOM	Unknown PHYLUM	Unknown CLASS	Unknown ORDER	Unknown FAMILY	Unknown GENUS	Unknown SPECIES	Unknown SUBSPECIES	0	0	0	0	0	0	0	0	0	0	0	0	0	0	0	0	0	0	0	0	0	0	0	0	0	0	0	0	0	142	0	0	0	0	0	0
Meta-Protein 4173	Metagenome unknown				Unknown SUPERKINGDOM	Unknown KINGDOM	Unknown PHYLUM	Unknown CLASS	Unknown ORDER	Unknown FAMILY	Unknown GENUS	Unknown SPECIES	Unknown SUBSPECIES	0	0	0	0	0	25	0	0	0	0	0	0	0	0	0	0	0	22	0	0	0	13	0	0	0	0	0	0	0	25	0	0	0	0	0	0
Meta-Protein 12821	BLAST_BUDR_KLEAE HTH-type transcriptional regulator BudR (Fragment) OS=Klebsiella aerogenes GN=budR PE=3 SV=1_P52665	DNA-binding;Transcription;Transcription regulation;	;	;	Bacteria	Unknown KINGDOM	Proteobacteria	Gammaproteobacteria	Enterobacteriales	Enterobacteriaceae	Enterobacter	Enterobacter aerogenes	Unknown SUBSPECIES	4	1	1	0	2	2	2	2	4	2	1	2	1	4	2	3	1	2	3	4	3	0	3	1	0	2	1	2	0	2	3	1	3	0	2	1
Meta-Protein 13936	BLAST_GUAA2_BACTN Putative GMP synthase [glutamine-hydrolyzing] 2 OS=Bacteroides thetaiotaomicron (strain ATCC 29148 / DSM 2079 / NCTC 10582 / E50 / VPI-5482) GN=guaA2 PE=5 SV=1_Q8A525	ATP-binding;Complete proteome;GMP biosynthesis;Glutamine amidotransferase;Ligase;Nucleotide-binding;Purine biosynthesis;Reference proteome;	6.3.5.2;	K01951;	Bacteria	Unknown KINGDOM	Bacteroidetes	Bacteroidia	Bacteroidales	Bacteroidaceae	Bacteroides	Bacteroides thetaiotaomicron	Bacteroides thetaiotaomicron VPI-5482	3	2	0	7	4	1	5	2	0	1	0	3	9	5	1	0	1	0	0	1	0	0	1	1	6	0	4	4	3	3	4	3	4	1	3	7
Meta-Protein 23600	BLAST_EUTE_SALTY Ethanolamine utilization protein EutE OS=Salmonella typhimurium (strain LT2 / SGSC1412 / ATCC 700720) GN=eutE PE=4 SV=2_P41793	Complete proteome;Oxidoreductase;Reference proteome;	;	K04021;	Bacteria	Unknown KINGDOM	Proteobacteria	Gammaproteobacteria	Enterobacteriales	Enterobacteriaceae	Salmonella	Salmonella enterica subsp. enterica serovar Typhimurium str. LT2	Salmonella enterica subsp. enterica	7	1	2	0	5	2	5	0	4	1	0	4	0	2	0	0	0	0	0	0	4	4	3	4	3	0	3	3	4	4	4	3	4	0	0	0
Meta-Protein 536	BLAST_SERC_BACC1 Phosphoserine aminotransferase OS=Bacillus cereus (strain ATCC 10987 / NRS 248) GN=serC PE=3 SV=1_Q734W9	3D-structure;Amino-acid biosynthesis;Aminotransferase;Chloroplast;Complete proteome;Cytoplasm;Direct protein sequencing;Plastid;Pyridoxal phosphate;Pyridoxine biosynthesis;Reference proteome;Serine biosynthesis;Transferase;Transit peptide;	2.6.1.52;	;K00831;	Unknown SUPERKINGDOM	Unknown KINGDOM	Unknown PHYLUM	Unknown CLASS	Unknown ORDER	Unknown FAMILY	Unknown GENUS	Unknown SPECIES	Unknown SUBSPECIES	4	2	0	1	10	2	0	3	1	0	0	2	2	3	0	3	1	0	0	9	0	0	0	0	0	8	0	0	0	6	0	0	0	31	0	5
Meta-Protein 1174	BLAST_ADH1_CLOSA NADPH-dependent butanol dehydrogenase OS=Clostridium saccharobutylicum GN=adh1 PE=3 SV=1_P13604	Direct protein sequencing;Iron;Multifunctional enzyme;NAD;NADP;Oxidoreductase;	1.1.1.-;1.1.1.1;1.2.1.10;	;	Unknown SUPERKINGDOM	Unknown KINGDOM	Unknown PHYLUM	Unknown CLASS	Unknown ORDER	Unknown FAMILY	Unknown GENUS	Unknown SPECIES	Unknown SUBSPECIES	4	2	0	0	0	15	23	1	20	4	0	1	4	2	0	0	0	0	0	0	0	0	0	0	0	2	2	1	0	42	0	0	0	0	0	0
Meta-Protein 754	BLAST_G6PI_CLOB8 Glucose-6-phosphate isomerase OS=Clostridium beijerinckii (strain ATCC 51743 / NCIMB 8052) GN=pgi PE=3 SV=1_A6LQ99	Complete proteome;Cytoplasm;Gluconeogenesis;Glycolysis;Isomerase;Phosphoprotein;Reference proteome;	5.3.1.9;	;K01810;	Unknown SUPERKINGDOM	Unknown KINGDOM	Unknown PHYLUM	Unknown CLASS	Unknown ORDER	Unknown FAMILY	Unknown GENUS	Unknown SPECIES	Unknown SUBSPECIES	4	2	3	0	5	14	2	1	6	2	0	2	2	2	0	0	4	1	1	0	0	0	0	0	0	3	0	0	0	0	0	16	0	20	8	0
Meta-Protein 1075	BLAST_FUCO_ECOLI Lactaldehyde reductase OS=Escherichia coli (strain K12) GN=fucO PE=1 SV=2_P0A9S1	3D-structure;Carbohydrate metabolism;Complete proteome;Fucose metabolism;Iron;Metal-binding;NAD;Oxidoreductase;Reference proteome;	1.1.1.77;	K00048;	Unknown SUPERKINGDOM	Unknown KINGDOM	Unknown PHYLUM	Unknown CLASS	Unknown ORDER	Unknown FAMILY	Unknown GENUS	Unknown SPECIES	Unknown SUBSPECIES	9	0	0	0	4	4	5	0	1	1	0	1	0	0	0	0	1	0	0	0	0	0	0	1	13	10	0	0	0	11	0	5	0	1	0	0
Meta-Protein 13287	BLAST_SBCD_RHOCB Nuclease SbcCD subunit D OS=Rhodobacter capsulatus (strain ATCC BAA-309 / NBRC 16581 / SB1003) GN=sbcD PE=3 SV=1_O68033	Complete proteome;Exonuclease;Hydrolase;Nuclease;Reference proteome;	;	K03547;	Bacteria	Unknown KINGDOM	Proteobacteria	Alphaproteobacteria	Rhodobacterales	Rhodobacteraceae	Rhodobacter	Rhodobacter capsulatus	Rhodobacter capsulatus SB 1003	0	1	0	3	0	0	4	0	3	0	3	2	1	2	0	1	1	0	2	1	0	0	6	5	3	0	4	5	1	0	0	5	0	1	2	1
Meta-Protein 12757	BLAST_DPO3_CLOTE DNA polymerase III PolC-type OS=Clostridium tetani (strain Massachusetts / E88) GN=polC PE=3 SV=1_Q895K2	Complete proteome;Cytoplasm;DNA replication;DNA-directed DNA polymerase;Exonuclease;Hydrolase;Nuclease;Nucleotidyltransferase;Reference proteome;Transferase;	2.7.7.7;	K03763;	Bacteria	Unknown KINGDOM	Firmicutes	Clostridia	Clostridiales	Clostridiaceae	Clostridium	Clostridium tetani	Clostridium tetani E88	0	7	3	0	0	5	4	3	0	4	0	4	0	0	0	0	3	3	0	3	8	4	0	0	2	4	0	0	5	0	4	5	0	5	3	1
Meta-Protein 13141	BLAST_TUAA_BACSU Putative undecaprenyl-phosphate N-acetylgalactosaminyl 1-phosphate transferase OS=Bacillus subtilis (strain 168) GN=tuaA PE=2 SV=1_O32274	Cell membrane;Cell wall biogenesis/degradation;Complete proteome;Glycosyltransferase;Membrane;Reference proteome;Stress response;Transferase;Transmembrane;Transmembrane helix;	2.7.8.40;	;	Bacteria	Unknown KINGDOM	Firmicutes	Bacilli	Bacillales	Bacillaceae	Bacillus	Bacillus subtilis subsp. subtilis str. 168	Bacillus subtilis subsp. subtilis	3	1	1	2	4	1	1	2	0	0	1	1	2	0	0	0	0	0	1	0	15	1	0	0	0	0	2	0	7	0	1	11	2	2	14	3
Meta-Protein 986	RL4_YERPY 50S ribosomal protein L4 OS=Yersinia pseudotuberculosis serotype O:3 (strain YPIII) GN=rplD PE=3 SV=1	3D-structure;Antibiotic resistance;Complete proteome;Direct protein sequencing;RNA-binding;Reference proteome;Repressor;Ribonucleoprotein;Ribosomal protein;Transcription;Transcription regulation;Transcription termination;Translation regulation;rRNA-binding;	;	;K02926;	Unknown SUPERKINGDOM	Unknown KINGDOM	Unknown PHYLUM	Unknown CLASS	Unknown ORDER	Unknown FAMILY	Unknown GENUS	Unknown SPECIES	Unknown SUBSPECIES	0	0	0	2	0	0	0	0	0	0	0	0	0	1	0	0	0	0	0	0	0	30	0	0	5	0	0	0	0	0	0	0	0	0	2	27
Meta-Protein 15863	Metagenome unknown				Unknown SUPERKINGDOM	Unknown KINGDOM	Unknown PHYLUM	Unknown CLASS	Unknown ORDER	Unknown FAMILY	Unknown GENUS	Unknown SPECIES	Unknown SUBSPECIES	1	2	3	2	2	4	4	4	4	4	2	4	3	2	0	0	2	0	0	2	0	3	0	3	0	2	1	0	0	0	2	5	3	4	6	0
Meta-Protein 4508	Metagenome unknown				Unknown SUPERKINGDOM	Unknown KINGDOM	Unknown PHYLUM	Unknown CLASS	Unknown ORDER	Unknown FAMILY	Unknown GENUS	Unknown SPECIES	Unknown SUBSPECIES	0	0	0	0	0	0	0	0	0	0	0	12	3	0	0	0	0	0	0	0	0	13	0	0	0	6	0	0	38	0	0	0	14	28	0	0
Meta-Protein 16682	BLAST_LEUC_ELUMP 3-isopropylmalate dehydratase large subunit OS=Elusimicrobium minutum (strain Pei191) GN=leuC PE=3 SV=1_B2KBD7	4Fe-4S;Amino-acid biosynthesis;Branched-chain amino acid biosynthesis;Complete proteome;Iron;Iron-sulfur;Leucine biosynthesis;Lyase;Metal-binding;Reference proteome;	4.2.1.33;	K01703;	Bacteria	Unknown KINGDOM	Elusimicrobia	Elusimicrobia	Elusimicrobiales	Elusimicrobiaceae	Elusimicrobium	Elusimicrobium minutum	Elusimicrobium minutum Pei191	0	2	0	3	0	0	2	0	2	0	0	1	1	0	0	0	0	0	0	3	0	0	0	5	0	4	3	5	0	5	3	3	0	0	0	0
Meta-Protein 449	BLAST_GLNA3_BACFR Glutamine synthetase OS=Bacteroides fragilis (strain YCH46) GN=glnA PE=1 SV=2_P15623	ATP-binding;Complete proteome;Cytoplasm;Ligase;Magnesium;Metal-binding;Nucleotide-binding;	6.3.1.2;	K01915;	Unknown SUPERKINGDOM	Unknown KINGDOM	Unknown PHYLUM	Unknown CLASS	Unknown ORDER	Unknown FAMILY	Unknown GENUS	Unknown SPECIES	Unknown SUBSPECIES	0	0	10	1	1	0	3	0	0	1	0	1	0	1	3	1	0	0	1	5	2	42	0	0	0	1	0	0	0	2	1	0	0	17	5	2
Meta-Protein 3544	Metagenome unknown	3D-structure;Acetylation;Complete proteome;DNA-directed RNA polymerase;Direct protein sequencing;Nucleotidyltransferase;Reference proteome;Transcription;Transferase;	2.7.7.6;	;K03040;	Unknown SUPERKINGDOM	Unknown KINGDOM	Unknown PHYLUM	Unknown CLASS	Unknown ORDER	Unknown FAMILY	Unknown GENUS	Unknown SPECIES	Unknown SUBSPECIES	0	0	0	0	4	0	0	0	0	0	0	0	0	0	0	0	0	0	0	2	0	24	1	0	6	0	3	0	0	0	0	0	0	0	0	24
Meta-Protein 4207	Metagenome unknown				Unknown SUPERKINGDOM	Unknown KINGDOM	Unknown PHYLUM	Unknown CLASS	Unknown ORDER	Unknown FAMILY	Unknown GENUS	Unknown SPECIES	Unknown SUBSPECIES	0	0	0	0	4	14	22	0	0	0	0	0	0	0	0	0	0	15	0	0	6	28	0	0	0	0	0	0	6	0	0	0	0	0	5	0
Meta-Protein 16538	Metagenome unknown				Unknown SUPERKINGDOM	Unknown KINGDOM	Unknown PHYLUM	Unknown CLASS	Unknown ORDER	Unknown FAMILY	Unknown GENUS	Unknown SPECIES	Unknown SUBSPECIES	2	1	3	2	0	0	3	3	1	1	2	4	1	0	0	0	2	0	0	1	2	2	5	3	2	4	5	3	3	5	2	0	3	6	4	0
Meta-Protein 17159	Metagenome unknown				Unknown SUPERKINGDOM	Unknown KINGDOM	Unknown PHYLUM	Unknown CLASS	Unknown ORDER	Unknown FAMILY	Unknown GENUS	Unknown SPECIES	Unknown SUBSPECIES	3	3	3	9	7	2	2	1	2	3	2	3	5	2	0	1	4	0	0	4	4	0	0	3	0	0	4	5	5	2	3	6	1	2	4	1
Meta-Protein 13136	Metagenome unknown				Unknown SUPERKINGDOM	Unknown KINGDOM	Unknown PHYLUM	Unknown CLASS	Unknown ORDER	Unknown FAMILY	Unknown GENUS	Unknown SPECIES	Unknown SUBSPECIES	2	1	1	0	1	0	2	1	2	2	2	0	2	0	0	0	0	0	0	1	7	0	2	1	1	0	6	6	2	0	0	3	4	0	6	3
Meta-Protein 406	BLAST_DGAL_SALTY D-galactose-binding periplasmic protein OS=Salmonella typhimurium (strain LT2 / SGSC1412 / ATCC 700720) GN=mglB PE=1 SV=2_P23905	3D-structure;Calcium;Chemotaxis;Complete proteome;Metal-binding;Periplasm;Reference proteome;Signal;Sugar transport;Transport;	;	K10540;	Unknown SUPERKINGDOM	Unknown KINGDOM	Unknown PHYLUM	Unknown CLASS	Unknown ORDER	Unknown FAMILY	Unknown GENUS	Unknown SPECIES	Unknown SUBSPECIES	12	0	0	1	0	1	0	11	8	0	0	5	8	1	0	0	0	0	3	0	0	0	0	7	0	0	0	0	0	0	0	3	2	0	1	0
Meta-Protein 24893	Metagenome unknown				Unknown SUPERKINGDOM	Unknown KINGDOM	Unknown PHYLUM	Unknown CLASS	Unknown ORDER	Unknown FAMILY	Unknown GENUS	Unknown SPECIES	Unknown SUBSPECIES	0	0	0	0	0	28	0	0	2	0	0	0	0	0	0	0	0	1	0	0	0	0	0	0	0	60	0	0	0	0	0	0	0	0	0	0
Meta-Protein 3357	Metagenome unknown				Unknown SUPERKINGDOM	Unknown KINGDOM	Unknown PHYLUM	Unknown CLASS	Unknown ORDER	Unknown FAMILY	Unknown GENUS	Unknown SPECIES	Unknown SUBSPECIES	0	0	0	0	0	0	1	0	0	0	0	0	0	0	0	0	0	0	0	0	0	0	0	0	0	14	0	0	0	13	0	0	40	0	12	0
Meta-Protein 12940	Metagenome unknown				Unknown SUPERKINGDOM	Unknown KINGDOM	Unknown PHYLUM	Unknown CLASS	Unknown ORDER	Unknown FAMILY	Unknown GENUS	Unknown SPECIES	Unknown SUBSPECIES	2	4	4	5	1	2	4	4	3	3	5	5	3	3	0	2	2	3	2	2	0	0	2	1	1	2	4	3	1	2	0	4	2	3	4	1
Meta-Protein 13146	Metagenome unknown				Unknown SUPERKINGDOM	Unknown KINGDOM	Unknown PHYLUM	Unknown CLASS	Unknown ORDER	Unknown FAMILY	Unknown GENUS	Unknown SPECIES	Unknown SUBSPECIES	1	0	0	1	2	0	1	2	0	0	1	1	0	1	0	1	1	1	3	1	13	0	2	1	1	0	3	0	1	0	0	6	0	1	5	4
Meta-Protein 308	BLAST_RS7_CLOPS 30S ribosomal protein S7 OS=Clostridium perfringens (strain SM101 / Type A) GN=rpsG PE=3 SV=1_Q0SQE0	3D-structure;Complete proteome;Direct protein sequencing;RNA-binding;Reference proteome;Ribonucleoprotein;Ribosomal protein;rRNA-binding;tRNA-binding;	;	K02992;	Bacteria	Unknown KINGDOM	Firmicutes	Unknown CLASS	Unknown ORDER	Unknown FAMILY	Unknown GENUS	Unknown SPECIES	Unknown SUBSPECIES	4	10	3	0	0	12	8	8	15	6	0	6	0	8	0	0	16	2	5	0	0	0	0	1	0	2	0	0	0	0	0	3	0	15	0	0
Meta-Protein 15830	BLAST_IDNO_ECOLI 5-keto-D-gluconate 5-reductase OS=Escherichia coli (strain K12) GN=idnO PE=1 SV=1_P0A9P9	Carbohydrate metabolism;Complete proteome;NAD;NADP;Oxidoreductase;Reference proteome;	1.1.1.69;	K00046;	Bacteria	Unknown KINGDOM	Proteobacteria	Gammaproteobacteria	Enterobacteriales	Enterobacteriaceae	Escherichia	Escherichia coli	Unknown SUBSPECIES	1	3	4	0	2	4	4	5	4	3	0	3	4	0	1	2	3	1	3	3	0	2	2	3	3	3	3	3	0	3	1	0	3	3	3	0
Meta-Protein 36	Metagenome unknown	Complete proteome;Reference proteome;Ribonucleoprotein;Ribosomal protein;	;	K02937;	Eukaryota	Fungi	Ascomycota	Saccharomycetes	Saccharomycetales	Dipodascaceae	Yarrowia	Yarrowia lipolytica	Yarrowia lipolytica CLIB122	0	1	0	0	0	1	2	1	0	0	0	0	0	0	1	0	0	0	0	0	0	18	3	3	1	3	1	0	0	0	0	0	3	15	2	0
Meta-Protein 268	BLAST_FIXB_CLOSA Protein FixB OS=Clostridium saccharobutylicum GN=fixB PE=3 SV=1_P53578	Complete proteome;Electron transport;FAD;Flavoprotein;Mitochondrion;Reference proteome;Transit peptide;Transport;	;	;K03522;	Unknown SUPERKINGDOM	Unknown KINGDOM	Unknown PHYLUM	Unknown CLASS	Unknown ORDER	Unknown FAMILY	Unknown GENUS	Unknown SPECIES	Unknown SUBSPECIES	0	0	1	0	0	0	0	0	9	1	0	0	3	0	1	0	0	0	0	20	0	0	0	0	0	0	2	0	0	0	0	0	0	2	0	0
Meta-Protein 624	BLAST_NIKA_ECOLI Nickel-binding periplasmic protein OS=Escherichia coli (strain K12) GN=nikA PE=1 SV=1_P33590	3D-structure;Complete proteome;Disulfide bond;Nickel;Peptide transport;Periplasm;Protein transport;Reference proteome;Signal;Transport;	;	;K15584;	Unknown SUPERKINGDOM	Unknown KINGDOM	Unknown PHYLUM	Unknown CLASS	Unknown ORDER	Unknown FAMILY	Unknown GENUS	Unknown SPECIES	Unknown SUBSPECIES	0	0	7	0	0	12	6	0	16	0	0	0	0	1	0	3	0	0	0	0	0	0	0	0	0	4	0	0	0	0	0	2	0	16	0	0
Meta-Protein 13854	Metagenome unknown				Unknown SUPERKINGDOM	Unknown KINGDOM	Unknown PHYLUM	Unknown CLASS	Unknown ORDER	Unknown FAMILY	Unknown GENUS	Unknown SPECIES	Unknown SUBSPECIES	4	3	4	2	3	2	4	4	3	2	1	3	2	3	1	2	2	0	2	1	0	0	6	2	5	4	3	2	3	4	0	1	6	4	2	3
Meta-Protein 16965	BLAST_TREC_ECOLI Trehalose-6-phosphate hydrolase OS=Escherichia coli (strain K12) GN=treC PE=1 SV=3_P28904	Complete proteome;Cytoplasm;Glycosidase;Hydrolase;Reference proteome;	3.2.1.93;	K01226;	Bacteria	Unknown KINGDOM	Proteobacteria	Gammaproteobacteria	Enterobacteriales	Enterobacteriaceae	Escherichia	Escherichia coli	Escherichia coli K-12	3	4	1	3	2	2	2	3	3	4	3	3	5	3	0	2	4	0	1	1	0	2	3	0	2	4	1	0	1	2	1	2	3	3	2	2
Meta-Protein 15358	BLAST_SECA_ANAPZ Protein translocase subunit SecA OS=Anaplasma phagocytophilum (strain HZ) GN=secA PE=3 SV=1_Q2GIT5	ATP-binding;Cell inner membrane;Cell membrane;Complete proteome;Cytoplasm;Membrane;Metal-binding;Nucleotide-binding;Protein transport;Reference proteome;Translocation;Transport;Zinc;	;	K03070;	Bacteria	Unknown KINGDOM	Proteobacteria	Alphaproteobacteria	Rickettsiales	Anaplasmataceae	Anaplasma	Anaplasma phagocytophilum	Anaplasma phagocytophilum HZ	5	1	1	2	2	1	0	3	0	1	0	0	2	0	0	0	1	0	2	1	3	1	2	8	3	2	4	2	3	0	2	5	2	2	5	2
Meta-Protein 24235	BLAST_PDUA_SALTY Propanediol utilization protein PduA OS=Salmonella typhimurium (strain LT2 / SGSC1412 / ATCC 700720) GN=pduA PE=1 SV=1_P0A1C7	3D-structure;Complete proteome;Reference proteome;	;	;	Bacteria	Unknown KINGDOM	Proteobacteria	Gammaproteobacteria	Enterobacteriales	Enterobacteriaceae	Salmonella	Salmonella enterica	Salmonella enterica subsp. enterica	1	2	2	0	0	2	2	2	2	2	3	4	0	1	1	1	2	0	0	0	0	4	0	5	5	9	4	2	2	0	0	0	8	1	0	1
Meta-Protein 20325	BLAST_Y1794_CLOTE UPF0261 protein CTC_01794 OS=Clostridium tetani (strain Massachusetts / E88) GN=CTC_01794 PE=3 SV=2_Q893M2	Complete proteome;Reference proteome;	;	;	Bacteria	Unknown KINGDOM	Firmicutes	Clostridia	Clostridiales	Clostridiaceae	Clostridium	Clostridium tetani	Clostridium tetani E88	2	0	2	0	3	0	1	0	3	0	0	0	0	2	3	1	3	1	2	3	6	0	2	0	8	0	4	8	0	2	4	4	3	0	4	5
Meta-Protein 1363	CASA1_SHEEP Alpha-S1-casein OS=Ovis aries GN=CSN1S1 PE=1 SV=3	Allergen;Alternative splicing;Antioxidant;Calcium;Complete proteome;Direct protein sequencing;Milk protein;Phosphoprotein;Polymorphism;Reference proteome;Repeat;Secreted;Signal;	;	;K17281;	Eukaryota	Metazoa	Chordata	Mammalia	Unknown ORDER	Bovidae	Unknown GENUS	Unknown SPECIES	Unknown SUBSPECIES	0	0	0	0	0	2	0	1	0	0	1	0	0	0	0	0	0	0	0	0	6	0	0	0	5	0	4	0	0	1	1	34	0	0	1	0
Meta-Protein 931	BLAST_FABF_BACSU 3-oxoacyl-[acyl-carrier-protein] synthase 2 OS=Bacillus subtilis (strain 168) GN=fabF PE=1 SV=1_O34340	3D-structure;Acyltransferase;Complete proteome;Direct protein sequencing;Fatty acid biosynthesis;Fatty acid metabolism;Lipid biosynthesis;Lipid metabolism;Reference proteome;Transferase;	2.3.1.179;	K09458;	Unknown SUPERKINGDOM	Unknown KINGDOM	Unknown PHYLUM	Unknown CLASS	Unknown ORDER	Unknown FAMILY	Unknown GENUS	Unknown SPECIES	Unknown SUBSPECIES	0	0	1	0	0	17	28	0	0	0	0	0	0	3	0	0	0	4	0	0	0	37	1	0	0	0	0	0	0	0	0	0	0	5	0	0
Meta-Protein 14762	Metagenome unknown				Unknown SUPERKINGDOM	Unknown KINGDOM	Unknown PHYLUM	Unknown CLASS	Unknown ORDER	Unknown FAMILY	Unknown GENUS	Unknown SPECIES	Unknown SUBSPECIES	2	4	9	0	0	12	4	6	12	29	1	5	16	1	18	1	6	2	3	0	0	0	0	4	0	3	3	0	0	0	4	0	0	0	0	0
Meta-Protein 5738	Metagenome unknown				Unknown SUPERKINGDOM	Unknown KINGDOM	Unknown PHYLUM	Unknown CLASS	Unknown ORDER	Unknown FAMILY	Unknown GENUS	Unknown SPECIES	Unknown SUBSPECIES	0	0	0	6	0	0	0	6	0	0	0	0	0	0	0	4	0	0	0	0	0	0	9	0	0	0	3	0	35	8	0	0	0	2	0	2
Meta-Protein 13280	BLAST_PYRG_FLAPJ CTP synthase OS=Flavobacterium psychrophilum (strain JIP02/86 / ATCC 49511) GN=pyrG PE=3 SV=1_A6H0U1	ATP-binding;Complete proteome;Glutamine amidotransferase;Ligase;Magnesium;Metal-binding;Nucleotide-binding;Pyrimidine biosynthesis;Reference proteome;	6.3.4.2;	K01937;	Bacteria	Unknown KINGDOM	Bacteroidetes	Flavobacteriia	Flavobacteriales	Flavobacteriaceae	Flavobacterium	Unknown SPECIES	Unknown SUBSPECIES	2	1	0	3	1	1	1	1	2	1	3	0	0	1	1	2	0	1	1	2	7	5	4	1	3	2	3	3	2	2	3	1	6	0	3	3
Meta-Protein 15890	Metagenome unknown				Unknown SUPERKINGDOM	Unknown KINGDOM	Unknown PHYLUM	Unknown CLASS	Unknown ORDER	Unknown FAMILY	Unknown GENUS	Unknown SPECIES	Unknown SUBSPECIES	2	7	3	8	2	2	4	0	3	5	4	6	5	7	0	0	3	0	0	5	0	0	5	1	0	1	3	0	0	2	0	2	1	6	2	0
Meta-Protein 481	BLAST_PGCA_BACSU Phosphoglucomutase OS=Bacillus subtilis (strain 168) GN=pgcA PE=1 SV=3_P18159	Carbohydrate metabolism;Complete proteome;Glucose metabolism;Isomerase;Magnesium;Metal-binding;Phosphoprotein;Reference proteome;	5.4.2.2;	K01835;	Unknown SUPERKINGDOM	Unknown KINGDOM	Unknown PHYLUM	Unknown CLASS	Unknown ORDER	Unknown FAMILY	Unknown GENUS	Unknown SPECIES	Unknown SUBSPECIES	2	0	0	0	0	0	2	0	0	0	0	2	1	0	0	1	1	0	0	0	3	4	10	1	0	2	2	2	1	2	2	0	5	34	2	0
Meta-Protein 5882	Metagenome unknown				Unknown SUPERKINGDOM	Unknown KINGDOM	Unknown PHYLUM	Unknown CLASS	Unknown ORDER	Unknown FAMILY	Unknown GENUS	Unknown SPECIES	Unknown SUBSPECIES	0	0	0	0	0	0	0	0	0	1	0	0	0	0	0	1	0	0	0	0	0	0	65	0	0	9	0	0	0	0	0	0	0	0	0	0
Meta-Protein 243	BLAST_FHL1_RAT Four and a half LIM domains protein 1 OS=Rattus norvegicus GN=Fhl1 PE=2 SV=1_Q9WUH4	3D-structure;Acetylation;Alternative splicing;Complete proteome;Cytoplasm;Developmental protein;Differentiation;Direct protein sequencing;Disease mutation;Emery-Dreifuss muscular dystrophy;Isopeptide bond;LIM domain;Metal-binding;Nucleus;Phosphoprotein;Polymorphism;Reference proteome;Repeat;Transcription;Transcription regulation;Ubl conjugation;Zinc;Zinc-finger;	;	;K14365;K14380;	Eukaryota	Metazoa	Chordata	Mammalia	Unknown ORDER	Unknown FAMILY	Unknown GENUS	Unknown SPECIES	Unknown SUBSPECIES	0	0	0	0	0	2	6	0	4	0	0	0	0	0	0	0	3	0	0	5	0	8	0	0	0	0	2	21	0	4	0	0	0	0	0	0
Meta-Protein 386	BLAST_CADH1_HUMAN Cadherin-1 OS=Homo sapiens GN=CDH1 PE=1 SV=3_P12830	3D-structure;Alternative splicing;Calcium;Cell adhesion;Cell junction;Cell membrane;Cleavage on pair of basic residues;Complete proteome;Direct protein sequencing;Disease mutation;Disulfide bond;Ectodermal dysplasia;Endosome;Glycoprotein;Golgi apparatus;Membrane;Metal-binding;Phosphoprotein;Polymorphism;Reference proteome;Repeat;Signal;Transmembrane;Transmembrane helix;Ubl conjugation;	;	K05689;	Eukaryota	Metazoa	Chordata	Mammalia	Primates	Hominidae	Unknown GENUS	Unknown SPECIES	Unknown SUBSPECIES	0	0	0	0	2	0	4	0	0	0	0	0	0	0	0	0	0	0	0	4	4	0	2	4	14	0	6	2	0	13	0	1	0	0	0	0
Meta-Protein 21379	Metagenome unknown				Unknown SUPERKINGDOM	Unknown KINGDOM	Unknown PHYLUM	Unknown CLASS	Unknown ORDER	Unknown FAMILY	Unknown GENUS	Unknown SPECIES	Unknown SUBSPECIES	4	0	1	0	9	1	2	0	3	1	2	0	0	1	0	0	0	0	0	2	15	1	0	2	7	1	2	4	16	0	1	1	3	2	0	3
Meta-Protein 2408	Metagenome unknown				Unknown SUPERKINGDOM	Unknown KINGDOM	Unknown PHYLUM	Unknown CLASS	Unknown ORDER	Unknown FAMILY	Unknown GENUS	Unknown SPECIES	Unknown SUBSPECIES	0	0	0	0	0	0	0	0	0	0	0	0	0	0	0	2	0	0	1	0	0	0	6	0	4	6	3	2	9	15	0	0	2	2	0	2
Meta-Protein 16353	Metagenome unknown				Unknown SUPERKINGDOM	Unknown KINGDOM	Unknown PHYLUM	Unknown CLASS	Unknown ORDER	Unknown FAMILY	Unknown GENUS	Unknown SPECIES	Unknown SUBSPECIES	0	3	4	1	0	3	0	1	3	1	2	2	2	0	1	0	2	3	2	1	0	3	1	3	4	3	2	1	0	6	0	3	3	5	0	3
Meta-Protein 2356	Metagenome unknown				Unknown SUPERKINGDOM	Unknown KINGDOM	Unknown PHYLUM	Unknown CLASS	Unknown ORDER	Unknown FAMILY	Unknown GENUS	Unknown SPECIES	Unknown SUBSPECIES	0	0	0	0	0	0	0	0	0	0	0	0	0	0	0	0	0	5	0	0	0	0	0	0	0	0	0	0	0	0	0	0	0	0	0	0
Meta-Protein 1228	BLAST_PEPD_ECOLI Cytosol non-specific dipeptidase OS=Escherichia coli (strain K12) GN=pepD PE=1 SV=3_P15288	Acetylation;Cobalt;Complete proteome;Dipeptidase;Direct protein sequencing;Hydrolase;Metal-binding;Metalloprotease;Protease;Reference proteome;Zinc;	3.4.13.18;	K01270;	Unknown SUPERKINGDOM	Unknown KINGDOM	Unknown PHYLUM	Unknown CLASS	Unknown ORDER	Unknown FAMILY	Unknown GENUS	Unknown SPECIES	Unknown SUBSPECIES	5	0	1	3	0	0	1	0	2	0	0	2	1	0	0	1	0	0	0	1	0	0	8	0	0	0	3	2	2	0	0	2	12	17	0	2
Meta-Protein 19656	BLAST_CHEB1_RHIEC Probable chemotaxis response regulator protein-glutamate methylesterase 1 OS=Rhizobium etli (strain CFN 42 / ATCC 51251) GN=cheB1 PE=3 SV=1_Q2KCH8	Chemotaxis;Complete proteome;Cytoplasm;Hydrolase;Phosphoprotein;Reference proteome;	3.1.1.61;	K03412;	Bacteria	Unknown KINGDOM	Proteobacteria	Alphaproteobacteria	Rhizobiales	Rhizobiaceae	Rhizobium	Rhizobium etli	Rhizobium etli CFN 42	1	0	0	1	0	0	0	0	0	0	4	0	0	0	0	0	0	0	0	0	8	4	6	7	7	0	5	10	6	7	9	2	7	0	1	5
Meta-Protein 430	Metagenome unknown	Cell outer membrane;Coiled coil;Complete proteome;Direct protein sequencing;Membrane;Reference proteome;Repeat;Signal;Transmembrane;Transmembrane helix;	;	;	Unknown SUPERKINGDOM	Unknown KINGDOM	Unknown PHYLUM	Unknown CLASS	Unknown ORDER	Unknown FAMILY	Unknown GENUS	Unknown SPECIES	Unknown SUBSPECIES	3	0	0	0	0	0	0	0	2	0	0	9	0	0	0	0	0	0	0	0	0	0	0	0	0	7	0	0	0	52	0	0	0	17	0	0
Meta-Protein 1750	Metagenome unknown				Unknown SUPERKINGDOM	Unknown KINGDOM	Unknown PHYLUM	Unknown CLASS	Unknown ORDER	Unknown FAMILY	Unknown GENUS	Unknown SPECIES	Unknown SUBSPECIES	0	0	0	0	0	0	0	0	0	0	0	0	0	0	0	0	0	0	0	5	0	2	0	15	0	0	0	0	0	0	0	4	0	7	8	0
Meta-Protein 15002	Metagenome unknown				Unknown SUPERKINGDOM	Unknown KINGDOM	Unknown PHYLUM	Unknown CLASS	Unknown ORDER	Unknown FAMILY	Unknown GENUS	Unknown SPECIES	Unknown SUBSPECIES	0	4	7	0	0	0	0	0	0	0	0	0	0	0	0	0	0	4	2	0	0	3	0	1	0	0	0	0	0	0	0	0	0	0	2	0
Meta-Protein 14233	BLAST_DAPB_PELCD 4-hydroxy-tetrahydrodipicolinate reductase OS=Pelobacter carbinolicus (strain DSM 2380 / NBRC 103641 / GraBd1) GN=dapB PE=3 SV=1_Q3A1U6	Amino-acid biosynthesis;Complete proteome;Cytoplasm;Diaminopimelate biosynthesis;Lysine biosynthesis;NAD;NADP;Oxidoreductase;Reference proteome;	1.17.1.8;	K00215;	Bacteria	Unknown KINGDOM	Proteobacteria	Deltaproteobacteria	Desulfuromonadales	Pelobacteraceae	Pelobacter	Pelobacter carbinolicus	Pelobacter carbinolicus DSM 2380	0	1	0	2	0	1	2	2	0	2	2	2	4	0	0	1	2	0	1	4	0	0	6	1	0	1	4	2	0	1	0	4	1	3	7	0
Meta-Protein 20326	BLAST_AMGDS_STRR6 Alpha-monoglucosyldiacylglycerol synthase OS=Streptococcus pneumoniae (strain ATCC BAA-255 / R6) GN=spr0982 PE=1 SV=1_Q8CWR6	Carbohydrate metabolism;Cell membrane;Complete proteome;Glycerol metabolism;Glycosyltransferase;Lipid biosynthesis;Lipid metabolism;Magnesium;Membrane;Reference proteome;Transferase;	2.4.1.337;	K19002;	Bacteria	Unknown KINGDOM	Firmicutes	Bacilli	Lactobacillales	Streptococcaceae	Streptococcus	Streptococcus pneumoniae	Streptococcus pneumoniae R6	2	0	2	0	3	0	1	0	2	0	0	0	0	2	2	3	2	0	2	3	6	0	2	0	8	0	4	8	0	1	3	3	3	0	4	5
Meta-Protein 5316	Metagenome unknown				Unknown SUPERKINGDOM	Unknown KINGDOM	Unknown PHYLUM	Unknown CLASS	Unknown ORDER	Unknown FAMILY	Unknown GENUS	Unknown SPECIES	Unknown SUBSPECIES	0	0	0	0	45	22	0	0	0	0	0	0	0	0	0	0	0	7	2	4	0	11	0	7	0	0	0	0	0	0	0	0	2	0	0	0
Meta-Protein 14310	BLAST_MCSB_MOOTA Protein-arginine kinase OS=Moorella thermoacetica (strain ATCC 39073 / JCM 9320) GN=mcsB PE=3 SV=1_Q2RM40	ATP-binding;Complete proteome;Kinase;Nucleotide-binding;Reference proteome;Transferase;	2.7.14.1;	K19405;	Bacteria	Unknown KINGDOM	Firmicutes	Clostridia	Thermoanaerobacterales	Thermoanaerobacteraceae	Moorella	Moorella thermoacetica	Moorella thermoacetica ATCC 39073	2	2	3	0	1	4	2	2	2	4	1	4	4	0	1	1	2	2	2	4	4	0	2	0	3	3	0	4	1	3	2	2	5	3	0	0
Meta-Protein 14318	Metagenome unknown				Unknown SUPERKINGDOM	Unknown KINGDOM	Unknown PHYLUM	Unknown CLASS	Unknown ORDER	Unknown FAMILY	Unknown GENUS	Unknown SPECIES	Unknown SUBSPECIES	5	2	4	3	6	4	5	4	2	5	2	4	2	6	4	3	3	5	0	1	1	2	2	0	1	0	0	1	0	2	1	1	1	3	2	0
Meta-Protein 12822	BLAST_RHTA_RHIME Rhizobactin receptor OS=Rhizobium meliloti (strain 1021) GN=rhtA PE=3 SV=1_Q9Z3Q5	Cell outer membrane;Complete proteome;Ion transport;Iron;Iron transport;Membrane;Plasmid;Receptor;Reference proteome;Signal;TonB box;Transmembrane;Transmembrane beta strand;Transport;	;	K02014;	Bacteria	Unknown KINGDOM	Proteobacteria	Alphaproteobacteria	Rhizobiales	Rhizobiaceae	Sinorhizobium	Sinorhizobium meliloti	Sinorhizobium meliloti 1021	3	1	2	0	2	1	4	1	2	0	2	2	1	4	2	3	2	2	3	4	3	0	4	0	0	2	1	2	0	1	2	2	3	0	2	0
Meta-Protein 830	Metagenome unknown				Unknown SUPERKINGDOM	Unknown KINGDOM	Unknown PHYLUM	Unknown CLASS	Unknown ORDER	Unknown FAMILY	Unknown GENUS	Unknown SPECIES	Unknown SUBSPECIES	4	1	3	1	4	4	2	1	3	1	3	2	0	3	1	0	0	0	1	3	2	0	3	2	3	1	2	4	5	5	1	3	5	0	3	1
Meta-Protein 1209	BLAST_MURQ_DEIGD N-acetylmuramic acid 6-phosphate etherase OS=Deinococcus geothermalis (strain DSM 11300) GN=murQ PE=3 SV=1_Q1J3J3	3D-structure;Carbohydrate metabolism;Complete proteome;Hydrolase;Lyase;Plasmid;Reference proteome;Repeat;	3.5.-.-;4.2.1.126;	K07106;K10708;	Unknown SUPERKINGDOM	Unknown KINGDOM	Unknown PHYLUM	Unknown CLASS	Unknown ORDER	Unknown FAMILY	Unknown GENUS	Unknown SPECIES	Unknown SUBSPECIES	6	4	0	0	10	3	10	4	4	0	1	5	0	3	0	0	0	0	0	3	0	0	11	0	0	0	2	0	0	0	0	2	4	8	1	0
Meta-Protein 3956	Metagenome unknown				Unknown SUPERKINGDOM	Unknown KINGDOM	Unknown PHYLUM	Unknown CLASS	Unknown ORDER	Unknown FAMILY	Unknown GENUS	Unknown SPECIES	Unknown SUBSPECIES	4	0	0	0	0	0	0	0	0	0	0	0	0	0	2	0	0	0	0	0	0	0	7	0	0	0	0	59	26	0	0	0	0	0	0	0
Meta-Protein 19386	BLAST_RFBJ_YERPU CDP-abequose synthase OS=Yersinia pseudotuberculosis GN=rfbJ PE=1 SV=1_Q05342	Lipopolysaccharide biosynthesis;NADP;Oxidoreductase;	1.1.1.341;	K19632;	Bacteria	Unknown KINGDOM	Proteobacteria	Gammaproteobacteria	Enterobacteriales	Enterobacteriaceae	Yersinia	Yersinia pseudotuberculosis	Unknown SUBSPECIES	2	1	0	0	0	3	3	2	4	2	0	3	0	4	2	0	1	0	0	0	2	0	3	8	1	2	5	3	4	1	3	1	3	4	0	1
Meta-Protein 3936	Metagenome unknown				Unknown SUPERKINGDOM	Unknown KINGDOM	Unknown PHYLUM	Unknown CLASS	Unknown ORDER	Unknown FAMILY	Unknown GENUS	Unknown SPECIES	Unknown SUBSPECIES	15	0	0	0	0	0	0	1	0	0	0	0	0	0	0	0	0	0	0	0	0	0	0	0	0	0	0	0	0	0	0	0	0	0	0	0
Meta-Protein 5362	Metagenome unknown				Unknown SUPERKINGDOM	Unknown KINGDOM	Unknown PHYLUM	Unknown CLASS	Unknown ORDER	Unknown FAMILY	Unknown GENUS	Unknown SPECIES	Unknown SUBSPECIES	0	0	0	0	0	0	0	0	0	0	0	0	0	0	0	0	0	0	0	0	0	0	0	4	0	0	0	0	0	0	0	0	0	0	0	0
Meta-Protein 282	Metagenome unknown				Unknown SUPERKINGDOM	Unknown KINGDOM	Unknown PHYLUM	Unknown CLASS	Unknown ORDER	Unknown FAMILY	Unknown GENUS	Unknown SPECIES	Unknown SUBSPECIES	0	0	10	0	0	1	1	0	7	0	0	0	0	0	0	0	1	0	0	0	0	0	0	0	0	3	2	0	0	0	0	0	0	22	1	0
Meta-Protein 1539	BLAST_GLNQ_BACSU Glutamine transport ATP-binding protein GlnQ OS=Bacillus subtilis (strain 168) GN=glnQ PE=2 SV=1_O34677	ATP-binding;Amino-acid transport;Cell membrane;Complete proteome;Hydrolase;Membrane;Nucleotide-binding;Reference proteome;Transport;	3.6.3.-;	K10041;	Bacteria	Unknown KINGDOM	Firmicutes	Bacilli	Bacillales	Bacillaceae	Bacillus	Bacillus subtilis subsp. subtilis str. 168	Bacillus subtilis subsp. subtilis	1	0	0	0	0	0	0	0	0	0	0	0	0	0	0	1	0	0	0	0	4	3	5	4	4	2	5	3	4	4	1	3	4	0	1	4
Meta-Protein 646	BLAST_SCPC_ECOLI Propionyl-CoA:succinate CoA transferase OS=Escherichia coli (strain K12) GN=scpC PE=1 SV=1_P52043	Complete proteome;Reference proteome;Transferase;	2.8.3.-;	K18118;K22214;	Unknown SUPERKINGDOM	Unknown KINGDOM	Unknown PHYLUM	Unknown CLASS	Unknown ORDER	Unknown FAMILY	Unknown GENUS	Unknown SPECIES	Unknown SUBSPECIES	0	0	0	0	1	0	0	2	0	0	0	4	0	0	0	0	0	0	0	0	0	0	0	0	15	2	0	0	0	26	0	1	0	18	2	8
Meta-Protein 37525	BLAST_E70B1_ARATH Exocyst complex component EXO70B1 OS=Arabidopsis thaliana GN=EXO70B1 PE=1 SV=1_Q9FGH9	Complete proteome;Cytoplasmic vesicle;Membrane;Reference proteome;Transport;Ubl conjugation;	;	;	Eukaryota	Viridiplantae	Streptophyta	Unknown CLASS	Brassicales	Brassicaceae	Arabidopsis	Arabidopsis thaliana	Unknown SUBSPECIES	5	3	0	2	1	3	0	1	0	0	0	2	2	3	0	0	0	0	0	3	0	0	7	0	8	2	1	7	2	4	3	1	4	3	4	5
Meta-Protein 1114	BLAST_THLA_SYNWW Acetyl-CoA acetyltransferase OS=Syntrophomonas wolfei subsp. wolfei (strain DSM 2245B / Goettingen) GN=Swol_1934 PE=1 SV=1_Q0AVM3	3D-structure;Acyltransferase;Complete proteome;Cytoplasm;Fatty acid metabolism;Lipid metabolism;Reference proteome;Transferase;	2.3.1.9;	K00626;	Bacteria	Unknown KINGDOM	Unknown PHYLUM	Unknown CLASS	Unknown ORDER	Unknown FAMILY	Unknown GENUS	Unknown SPECIES	Unknown SUBSPECIES	0	45	0	0	0	6	0	32	2	0	0	3	0	0	0	0	13	5	1	0	0	0	0	0	0	0	0	0	0	0	0	0	0	22	1	0
Meta-Protein 4188	Metagenome unknown				Unknown SUPERKINGDOM	Unknown KINGDOM	Unknown PHYLUM	Unknown CLASS	Unknown ORDER	Unknown FAMILY	Unknown GENUS	Unknown SPECIES	Unknown SUBSPECIES	0	0	0	0	0	33	34	0	0	0	0	0	0	0	0	0	0	11	0	0	0	5	0	17	0	0	0	0	0	0	0	0	0	0	0	0
Meta-Protein 14084	BLAST_P60_LISWE Probable endopeptidase p60 OS=Listeria welshimeri GN=iap PE=3 SV=1_Q01839	Hydrolase;Protease;Repeat;Signal;Thiol protease;	3.4.-.-;	;	Bacteria	Unknown KINGDOM	Firmicutes	Bacilli	Bacillales	Listeriaceae	Listeria	Listeria welshimeri	Unknown SUBSPECIES	4	4	4	4	3	3	5	3	4	3	2	3	5	4	1	2	2	2	0	4	0	0	5	1	0	3	1	0	0	3	0	4	2	3	4	0
Meta-Protein 1680	Metagenome unknown	Complete proteome;Cytoplasm;Hydrolase;Protease;Reference proteome;Serine protease;	3.4.21.92;	K01358;	Unknown SUPERKINGDOM	Unknown KINGDOM	Unknown PHYLUM	Unknown CLASS	Unknown ORDER	Unknown FAMILY	Unknown GENUS	Unknown SPECIES	Unknown SUBSPECIES	2	2	0	0	0	2	2	0	0	0	1	2	0	4	3	3	2	2	3	1	0	2	3	0	4	4	1	2	2	0	0	0	3	3	0	1
Meta-Protein 13976	BLAST_PURS_BACSU Phosphoribosylformylglycinamidine synthase subunit PurS OS=Bacillus subtilis (strain 168) GN=purS PE=1 SV=1_P12049	3D-structure;ATP-binding;Complete proteome;Cytoplasm;Ligase;Nucleotide-binding;Purine biosynthesis;Reference proteome;	6.3.5.3;	K01952;	Bacteria	Unknown KINGDOM	Firmicutes	Bacilli	Bacillales	Bacillaceae	Bacillus	Bacillus subtilis subsp. subtilis str. 168	Bacillus subtilis subsp. subtilis	0	4	2	1	0	2	2	2	4	4	2	4	0	2	0	2	1	1	0	0	0	2	1	1	1	2	1	1	2	4	0	2	5	5	1	0
Meta-Protein 14317	SYA_ACICJ Alanine--tRNA ligase OS=Acidiphilium cryptum (strain JF-5) GN=alaS PE=3 SV=1	Aminoacyl-tRNA synthetase;ATP-binding;Complete proteome;Cytoplasm;Ligase;Metal-binding;Nucleotide-binding;Protein biosynthesis;Reference proteome;RNA-binding;tRNA-binding;Zinc;	6.1.1.7;	K01872;	Bacteria	Unknown KINGDOM	Proteobacteria	Alphaproteobacteria	Rhodospirillales	Acetobacteraceae	Acidiphilium	Acidiphilium cryptum	Acidiphilium cryptum JF-5	3	1	4	2	6	4	5	4	3	5	2	4	2	5	4	6	3	5	1	2	1	2	2	0	1	0	0	1	0	2	1	1	1	2	2	0
Meta-Protein 3453	RS5_SALCH 30S ribosomal protein S5 OS=Salmonella choleraesuis (strain SC-B67) GN=rpsE PE=3 SV=1	3D-structure;Acetylation;Antibiotic resistance;Complete proteome;Direct protein sequencing;RNA-binding;Reference proteome;Ribonucleoprotein;Ribosomal protein;rRNA-binding;	;	;K02988;	Unknown SUPERKINGDOM	Unknown KINGDOM	Unknown PHYLUM	Unknown CLASS	Unknown ORDER	Unknown FAMILY	Unknown GENUS	Unknown SPECIES	Unknown SUBSPECIES	0	0	0	0	0	0	0	2	0	0	0	0	0	0	0	0	0	0	0	0	0	35	0	0	2	0	0	0	0	0	0	1	0	0	1	30
Meta-Protein 3496	EFTS_ECOLU Elongation factor Ts OS=Escherichia coli O17:K52:H18 (strain UMN026 / ExPEC) GN=tsf PE=3 SV=1	3D-structure;Complete proteome;Cytoplasm;Direct protein sequencing;Elongation factor;Protein biosynthesis;Reference proteome;	;	K02357;	Unknown SUPERKINGDOM	Unknown KINGDOM	Unknown PHYLUM	Unknown CLASS	Unknown ORDER	Unknown FAMILY	Unknown GENUS	Unknown SPECIES	Unknown SUBSPECIES	0	0	0	0	0	0	0	0	0	0	0	0	0	0	0	0	0	0	0	0	0	29	0	0	2	0	0	0	0	0	0	0	0	0	0	29
Meta-Protein 1059	BLAST_SYM_GEOSE Methionine--tRNA ligase OS=Geobacillus stearothermophilus GN=metG PE=3 SV=1_P23920	ATP-binding;Aminoacyl-tRNA synthetase;Cytoplasm;Ligase;Metal-binding;Nucleotide-binding;Protein biosynthesis;RNA-binding;Zinc;tRNA-binding;	6.1.1.10;	;	Bacteria	Unknown KINGDOM	Firmicutes	Bacilli	Bacillales	Bacillaceae	Geobacillus	Geobacillus stearothermophilus	Unknown SUBSPECIES	1	1	2	0	0	1	1	0	2	0	1	0	0	0	1	1	0	1	3	2	1	1	4	1	1	3	4	0	2	3	4	0	2	2	0	2
Meta-Protein 868	BLAST_YBJX_ECOLI Uncharacterized protein YbjX OS=Escherichia coli (strain K12) GN=ybjX PE=4 SV=1_P75829	Complete proteome;Reference proteome;	;	K09824;	Bacteria	Unknown KINGDOM	Proteobacteria	Gammaproteobacteria	Enterobacteriales	Enterobacteriaceae	Escherichia	Escherichia coli	Escherichia coli K-12	0	3	3	2	0	2	3	3	3	2	2	3	0	1	0	0	3	1	0	2	0	3	3	3	3	2	2	0	1	6	0	3	3	3	3	0
Meta-Protein 13814	Metagenome unknown				Unknown SUPERKINGDOM	Unknown KINGDOM	Unknown PHYLUM	Unknown CLASS	Unknown ORDER	Unknown FAMILY	Unknown GENUS	Unknown SPECIES	Unknown SUBSPECIES	2	2	3	0	2	3	1	3	3	1	0	2	1	0	0	0	0	0	0	4	0	3	4	2	3	4	2	3	0	5	0	2	4	4	2	0
Meta-Protein 24025	BLAST_DHE2_CLOSY NAD-specific glutamate dehydrogenase OS=Clostridium symbiosum GN=gdh PE=1 SV=4_P24295	3D-structure;Direct protein sequencing;NAD;Oxidoreductase;	1.4.1.2;	;	Bacteria	Unknown KINGDOM	Firmicutes	Clostridia	Clostridiales	Clostridiaceae	Clostridium	Clostridium symbiosum	Unknown SUBSPECIES	3	3	4	0	6	4	2	4	5	5	3	5	0	4	2	2	5	2	2	4	0	2	0	2	3	3	2	6	1	1	0	0	5	5	0	3
Meta-Protein 2323	Metagenome unknown	Elongation factor;Protein biosynthesis;	;	;	Eukaryota	Viridiplantae	Streptophyta	Unknown CLASS	Rosales	Rosaceae	Prunus	Prunus avium	Unknown SUBSPECIES	0	0	0	0	52	0	0	0	0	0	0	0	0	0	0	0	0	0	1	0	0	0	2	0	25	0	0	0	0	5	0	0	2	6	0	0
Meta-Protein 3195	Metagenome unknown				Unknown SUPERKINGDOM	Unknown KINGDOM	Unknown PHYLUM	Unknown CLASS	Unknown ORDER	Unknown FAMILY	Unknown GENUS	Unknown SPECIES	Unknown SUBSPECIES	0	0	0	0	36	0	0	0	0	1	0	0	0	0	0	0	0	0	15	0	0	0	0	0	0	0	20	0	0	0	0	0	0	0	0	0
Meta-Protein 21367	Metagenome unknown				Unknown SUPERKINGDOM	Unknown KINGDOM	Unknown PHYLUM	Unknown CLASS	Unknown ORDER	Unknown FAMILY	Unknown GENUS	Unknown SPECIES	Unknown SUBSPECIES	2	2	2	0	8	0	1	1	0	0	1	1	0	1	0	0	2	0	1	3	21	0	0	1	3	1	0	1	20	0	1	0	2	1	0	3
Meta-Protein 13506	Y351_CAUCR Putative outer membrane protein CC_0351 OS=Caulobacter crescentus (strain ATCC 19089 / CB15) GN=CC_0351 PE=3 SV=1	Cell outer membrane;Complete proteome;Membrane;Reference proteome;Signal;	;	K07274;	Bacteria	Unknown KINGDOM	Proteobacteria	Alphaproteobacteria	Caulobacterales	Caulobacteraceae	Caulobacter	Caulobacter vibrioides	Caulobacter crescentus CB15	4	1	0	3	4	2	4	0	0	1	0	2	0	3	0	3	0	0	1	1	5	2	1	2	4	0	1	4	4	3	4	3	4	0	4	0
Meta-Protein 1633	BLAST_RS4_EUBE2 30S ribosomal protein S4 OS=Eubacterium eligens (strain ATCC 27750 / VPI C15-48) GN=rpsD PE=3 SV=1_C4Z2V6	Complete proteome;RNA-binding;Reference proteome;Ribonucleoprotein;Ribosomal protein;rRNA-binding;	;	K02986;	Unknown SUPERKINGDOM	Unknown KINGDOM	Unknown PHYLUM	Unknown CLASS	Unknown ORDER	Unknown FAMILY	Unknown GENUS	Unknown SPECIES	Unknown SUBSPECIES	22	9	1	6	5	3	6	2	3	5	0	9	0	4	2	1	0	0	0	0	0	0	0	0	5	0	0	0	0	0	2	1	0	3	3	0
Meta-Protein 1351	Metagenome unknown	Complete proteome;Diabetes mellitus;Digestion;Direct protein sequencing;Disulfide bond;Lipid degradation;Lipid metabolism;Polymorphism;Reference proteome;Secreted;Signal;	;	;K14460;	Unknown SUPERKINGDOM	Unknown KINGDOM	Unknown PHYLUM	Unknown CLASS	Unknown ORDER	Unknown FAMILY	Unknown GENUS	Unknown SPECIES	Unknown SUBSPECIES	0	0	0	0	0	0	1	0	3	0	0	0	0	0	0	0	0	0	0	0	9	2	0	0	6	0	1	8	0	0	4	0	1	0	0	0
Meta-Protein 32566	Metagenome unknown				Unknown SUPERKINGDOM	Unknown KINGDOM	Unknown PHYLUM	Unknown CLASS	Unknown ORDER	Unknown FAMILY	Unknown GENUS	Unknown SPECIES	Unknown SUBSPECIES	3	1	0	5	3	1	2	0	0	3	1	7	4	1	0	0	0	0	0	0	0	0	4	0	5	2	3	4	0	0	1	6	0	1	5	5
[truncated: 41,764 more rows]
[truncated: 50 more columns]

## Sheet: 1_ All MP Norm.
Description	Description	Biol Processes	EC	KO	Superkingdom	Kingdom	Phylum	Class	Order	Familie	Genus	Species	Subspecies	Average	C_01	C_02	C_03	C_04	C_05	C_06	C_07	C_08	C_09	C_10	C_11	C_12	C_13	C_14	C_15	C_16	C_17	C_18	C_19	N_20	N_21	N_22	N_23	N_24	N_25	N_26	N_27	N_28	N_29	N_30	N_31	N_32	N_33	N_34	N_35
[truncated: 42,573 more rows]
[truncated: 45 more columns]

[truncated: 11 more sheets: 2_Microorganisms, 3_Hominidae, 4_Bacteria, 5_Archaea, 6_Fungi, 7_Virus, 8_Metazoa, 9_immunoglobulin, 10_Summary, 12_Korrel, 13_Summary_Kruskal Wallis]
