# Supplementary material for: Discovering Biomarkers for Non-Alcoholic Steatohepatitis Patients with and without Hepatocellular Carcinoma Using Fecal Metaproteomics
Source: Int J Mol Sci. 2022 Aug 9;23(16):8841. doi: 10.3390/ijms23168841 (PMC9408600; doi:10.3390/ijms23168841)
Supplement: Supplementary file 1 [file ijms-23-08841-s001.zip › Supplementary Table S3 Significant differences on taxonomy level.xlsx]

## Sheet: Overview_Superkingdom
Superkingdom	C_01	C_02	C_03	C_04	C_05	C_06	C_07	C_08	C_09	C_10	C_11	C_12	C_13	C_14	C_15	C_16	C_17	C_18	C_19	N_20	N_21	N_22	N_23	N_24	N_25	N_26	N_27	N_28	N_29	N_30	N_31	N_32	N_33	N_34	N_35	N_36	N_37	N_38	N_39	N_40	N_41	N_42	N_43	N_44	N_45	N_46	N_47	N_48	N_49
Archaea	0.00874857	0.0111623	0.00929999	0.0136126	0.00671203	0.00615651	0.00730704	0.00664694	0.0057558	0.00895457	0.00784593	0.00646164	0.010035	0.00728234	0.00743771	0.0053286	0.00671406	0.00789344	0.0070898	0.00707111	0.00789319	0.00440003	0.00497086	0.0066464	0.00519971	0.00419401	0.00891819	0.00669915	0.00665304	0.00406872	0.00691059	0.00735294	0.00580745	0.00455953	0.011666	0.00695286	0.00672585	0.012269	0.00663582	0.00505325	0.00628333	0.00504083	0.0057194	0.0087803	0.00672382	0.00872824	0.00512476	0.00803916	0.00615263
Bacteria	0.124857	0.185501	0.142202	0.172193	0.106837	0.108811	0.105278	0.10703	0.0952866	0.122233	0.137423	0.122868	0.151906	0.127086	0.106545	0.111627	0.13122	0.103971	0.109723	0.139638	0.0903938	0.0640242	0.11553	0.0921175	0.0889728	0.0941925	0.132739	0.0929887	0.0850546	0.0752507	0.10232	0.144787	0.0973199	0.0842644	0.144091	0.0939689	0.0887813	0.162656	0.11427	0.0757028	0.0801815	0.0889707	0.0896817	0.140103	0.113801	0.125841	0.114697	0.135068	0.100248
Eukaryota	0.0458349	0.0490794	0.0595074	0.0509599	0.0395315	0.0400857	0.0345133	0.0309058	0.0334117	0.0585068	0.135877	0.0323082	0.0394034	0.0374428	0.0449981	0.0342943	0.0420616	0.0357671	0.0445645	0.0538594	0.0552103	0.0277053	0.0495943	0.0864438	0.0595848	0.0317265	0.0617811	0.0481121	0.0616602	0.033495	0.0906948	0.0582257	0.0631966	0.0442031	0.0580779	0.0555702	0.0507129	0.0811964	0.0379886	0.0474942	0.042083	0.0321605	0.0509688	0.0774957	0.0392223	0.0612004	0.0436215	0.0626127	0.0577444
UNKNOWN	0.817278	0.749079	0.785472	0.758464	0.842568	0.841937	0.850631	0.8527	0.862914	0.805362	0.71398	0.835204	0.794053	0.824451	0.83916	0.845881	0.816746	0.848668	0.83609	0.796722	0.84348	0.902342	0.826077	0.811834	0.842699	0.864361	0.791909	0.848165	0.843675	0.885747	0.795522	0.786047	0.831187	0.865267	0.782129	0.840716	0.851762	0.737928	0.837575	0.869223	0.86946	0.872064	0.851763	0.769613	0.838236	0.800072	0.834177	0.790466	0.833032
Viruses	0.00328072	0.00517837	0.00351892	0.00477022	0.00435125	0.00300985	0.00227015	0.002717	0.00263223	0.00494424	0.00487399	0.00315795	0.0046032	0.00373783	0.00185943	0.00286925	0.00325829	0.00370005	0.00253208	0.00270949	0.00302292	0.00152882	0.00382814	0.00295846	0.0035435	0.00552623	0.00465297	0.00403471	0.00295691	0.00143843	0.00455349	0.0035868	0.00248891	0.00170548	0.00403582	0.00279168	0.00201776	0.00595019	0.00353099	0.00252663	0.00199228	0.00176429	0.00186756	0.0040084	0.00201715	0.00415875	0.00237935	0.00381345	0.00282231
Total	1	1	1	1	1	1	1	1	1	1	1	1	1	1	1	1	1	1	1	1	1	1	1	1	1	1	1	1	1	1	1	1	1	1	1	1	1	1	1	1	1	1	1	1	1	1	1	1	1
[truncated: 33 more columns]

## Sheet: Overview_SingnificancesFamilies
Superkingdom	Kingdom	Phylum	Class	Order	Family	C_01	C_02	C_03	C_04	C_05	C_06	C_07	C_08	C_09	C_10	C_11	C_12	C_13	C_14	C_15	C_16	C_17	C_18	C_19	N_20	N_21	N_22	N_23	N_24	N_25	N_26	N_27	N_28	N_29	N_30	N_31	N_32	N_33	N_34	N_35	N_36	N_37	N_38	N_39	N_40	N_41	N_42	N_43	N_44
UNKNOWN	Unknown KINGDOM	Unknown PHYLUM	Unknown CLASS	Unknown ORDER	Unknown FAMILY	0.817278	0.749079	0.785472	0.758464	0.842568	0.841937	0.850631	0.8527	0.862914	0.805362	0.71398	0.835204	0.794053	0.824451	0.83916	0.845881	0.816746	0.848668	0.83609	0.796722	0.84348	0.902342	0.826077	0.811834	0.842699	0.864361	0.791909	0.848165	0.843675	0.885747	0.795522	0.786047	0.831187	0.865267	0.782129	0.840716	0.851762	0.737928	0.837575	0.869223	0.86946	0.872064	0.851763	0.769613
Bacteria	Unknown KINGDOM	Firmicutes	Bacilli	Bacillales	Bacillaceae	0.0242488	0.0355006	0.0312304	0.0264107	0.0206916	0.0182415	0.0179484	0.0184853	0.0169866	0.02148	0.0236567	0.023466	0.0255017	0.0208803	0.0159911	0.0228173	0.0211295	0.0177602	0.0222822	0.0247819	0.0176757	0.00880006	0.0197692	0.0139818	0.0144051	0.0144077	0.0232648	0.0169382	0.0172631	0.0135624	0.0163926	0.0266619	0.0190095	0.0142007	0.0245302	0.0151699	0.0139898	0.034806	0.02216	0.0130489	0.0123215	0.0172396	0.0160299	0.0250048
Eukaryota	Metazoa	Chordata	Mammalia	Primates	Hominidae	0.0152625	0.011565	0.00647229	0.008726	0.00874879	0.0122674	0.0119183	0.0107709	0.00951111	0.0140636	0.00998574	0.008988	0.0103112	0.0105046	0.0124582	0.00929089	0.0138231	0.0119635	0.00911546	0.0150013	0.0201528	0.00574241	0.0194264	0.0579534	0.0298117	0.00952287	0.018418	0.0136647	0.0223507	0.00998685	0.0432314	0.0215208	0.0288569	0.00751801	0.0194224	0.0181196	0.0126446	0.0263809	0.0115061	0.0149998	0.00695764	0.0103337	0.018092	0.0322581
Bacteria	Unknown KINGDOM	Proteobacteria	Gammaproteobacteria	Enterobacteriales	Enterobacteriaceae	0.0175922	0.0322785	0.0224331	0.0250145	0.0160163	0.0171926	0.0148269	0.0179031	0.0161092	0.0184585	0.0187827	0.0175387	0.0246732	0.021267	0.0154332	0.0163957	0.0224131	0.0138135	0.0163741	0.0183717	0.011168	0.0108509	0.0166838	0.0130091	0.0107075	0.0150984	0.0185472	0.01199	0.0110884	0.0105622	0.0123748	0.0201459	0.0154745	0.0131913	0.0237104	0.0140637	0.0126446	0.0240114	0.0183246	0.0088272	0.0134862	0.0141647	0.0142012	0.0208055
Bacteria	Unknown KINGDOM	Firmicutes	Clostridia	Clostridiales	Clostridiaceae	0.00946177	0.0147871	0.00961418	0.0162885	0.00833218	0.00848231	0.00900965	0.00946097	0.00715965	0.00878976	0.00951022	0.0117087	0.0134414	0.00799123	0.00929714	0.00560186	0.0135269	0.00875678	0.00928427	0.00971451	0.0047863	0.0041763	0.00702777	0.00506586	0.00546932	0.00858538	0.00969368	0.00669915	0.00639214	0.00620582	0.00482134	0.01088	0.00515817	0.00824893	0.0118552	0.00605741	0.00793651	0.00921489	0.00760989	0.00572489	0.00845951	0.00751084	0.00560268	0.00973468
Eukaryota	Viridiplantae	Streptophyta	Unknown CLASS	Brassicales	Brassicaceae	0.00665652	0.00909091	0.00810607	0.0107039	0.00759154	0.0060197	0.00532066	0.0043666	0.00442214	0.0082404	0.00998574	0.00636448	0.00727306	0.00721789	0.00762365	0.00546523	0.00799763	0.00407005	0.00827144	0.00766587	0.00596188	0.00305765	0.00742772	0.00405269	0.0056619	0.00444072	0.00949981	0.00593788	0.00700091	0.00558935	0.00717844	0.0074725	0.00490567	0.00389823	0.00996342	0.00663682	0.00390099	0.0101627	0.00401802	0.00473343	0.0039539	0.00413348	0.00540814	0.00706242
Eukaryota	Metazoa	Chordata	Mammalia	Rodentia	Muridae	0.00413655	0.00356732	0.00471283	0.00732984	0.003194	0.00269062	0.00290863	0.002717	0.00263223	0.00247212	0.00404184	0.00213769	0.0035905	0.00290004	0.0052064	0.00314251	0.00236967	0.00148002	0.00607698	0.00436162	0.00663364	0.00249832	0.00445663	0.00368794	0.00450641	0.00291114	0.00613933	0.0101248	0.00987085	0.0022604	0.00664274	0.00484218	0.00508603	0.00215795	0.00416194	0.0064788	0.00336293	0.00700332	0.00517472	0.00914702	0.00220683	0.00221797	0.00350167	0.00820767
Bacteria	Unknown KINGDOM	Actinobacteria	Actinobacteria	Actinomycetales	Mycobacteriaceae	0.00313808	0.00632911	0.00496418	0.0072135	0.00291626	0.00328347	0.00308598	0.00329921	0.00263223	0.00406526	0.00891584	0.0041782	0.00662861	0.00418895	0.00446263	0.00327914	0.00434439	0.00333004	0.00303849	0.00455987	0.00268704	0.00201357	0.00359959	0.00312057	0.00265763	0.00325653	0.00471759	0.00361602	0.00182632	0.00279467	0.00353565	0.00526064	0.0029939	0.00215795	0.00567537	0.0037398	0.00161421	0.00837239	0.00511384	0.00207887	0.00288114	0.00347817	0.00338495	0.00591716
Eukaryota	Viridiplantae	Streptophyta	Liliopsida	Poales	Poaceae	0.00137885	0.00420023	0.00603242	0.0034904	0.00282368	0.0047884	0.00276674	0.00203775	0.00186011	0.0151074	0.00404184	0.00276928	0.00184128	0.00199781	0.00371886	0.00245935	0.00167851	0.00333004	0.00236327	0.00806238	0.000713746	0.00492207	0.00154268	0.00141844	0.000731811	0.00251641	0.00355435	0.00140834	0.00569639	0.00316456	0.00332137	0.00352702	0.00602388	0.0133654	0.00416194	0.00300237	0.0107614	0.00552893	0.00188725	0.00214283	0.00873536	0.00282286	0.00178974	0.00591716
Bacteria	Unknown KINGDOM	Proteobacteria	Gammaproteobacteria	Pasteurellales	Pasteurellaceae	0.00294789	0.00552359	0.0043358	0.0037231	0.00249965	0.0036027	0.00283768	0.00295958	0.00336925	0.00313135	0.0042796	0.00291503	0.00386669	0.00296449	0.0026032	0.00300587	0.00434439	0.00185002	0.00185685	0.00528681	0.00415652	0.00167798	0.00434236	0.00466059	0.004699	0.00251641	0.00529921	0.00331151	0.00256555	0.00156173	0.00278567	0.0062769	0.00328247	0.00174028	0.00334216	0.00358178	0.00282486	0.00410721	0.00328747	0.00268654	0.00278919	0.0024196	0.00249008	0.00381752
Bacteria	Unknown KINGDOM	Firmicutes	Clostridia	Thermoanaerobacterales	Thermoanaerobacteraceae	0.00237733	0.00437284	0.00307905	0.00442118	0.00217562	0.00291864	0.00241203	0.00359032	0.00231636	0.00450475	0.00404184	0.00320653	0.00368256	0.00348005	0.0039048	0.00259598	0.00315956	0.00209669	0.0033761	0.00257732	0.00361072	0.00152882	0.00451377	0.00356636	0.00331241	0.00261509	0.00355435	0.00392052	0.00408749	0.00361664	0.00385707	0.00340746	0.00259712	0.00240159	0.00353134	0.00231762	0.00269034	0.00321205	0.00353099	0.003678	0.00205358	0.00216756	0.00241226	0.00324489
Bacteria	Unknown KINGDOM	Proteobacteria	Gammaproteobacteria	Pseudomonadales	Pseudomonadaceae	0.00228224	0.00362486	0.00238784	0.00430483	0.00236078	0.00209778	0.00237656	0.00208626	0.00259713	0.00318629	0.00178317	0.00291503	0.00368256	0.00309338	0.00185943	0.00204946	0.0024684	0.00123335	0.00253207	0.00436162	0.00146948	0.00167798	0.00359959	0.00312057	0.00265763	0.00172694	0.0031666	0.00247412	0.00208723	0.00139734	0.00283923	0.00490196	0.00313819	0.00222756	0.00334216	0.00247564	0.00201776	0.0048444	0.00200901	0.00131129	0.00183902	0.00166347	0.002101	0.00305402
Bacteria	Unknown KINGDOM	Firmicutes	Bacilli	Bacillales	Staphylococcaceae	0.00351845	0.00431531	0.00464999	0.00581734	0.00282368	0.00269062	0.00305051	0.00261996	0.0028428	0.00225238	0.00261531	0.00398387	0.00349843	0.00296449	0.00241726	0.00327914	0.00276461	0.00185002	0.00270088	0.0048903	0.00235116	0.000820345	0.00199977	0.00158055	0.00200285	0.00202299	0.0036836	0.00243605	0.00226116	0.00156173	0.00332137	0.002989	0.00259712	0.00174028	0.0029638	0.00205425	0.00201776	0.00394924	0.00267868	0.00214283	0.00162447	0.00146184	0.00194537	0.00324489
Bacteria	Unknown KINGDOM	Firmicutes	Bacilli	Lactobacillales	Streptococcaceae	0.00299544	0.0047756	0.0028277	0.00255963	0.00199046	0.00191536	0.00251844	0.00228034	0.00210578	0.00258199	0.00297195	0.00267211	0.00248573	0.00264226	0.00353291	0.00286924	0.00325829	0.00135669	0.00286968	0.00317209	0.00205727	0.00115594	0.00245686	0.00129686	0.00238801	0.00182563	0.00374822	0.00216961	0.0010871	0.00119185	0.00262495	0.00304878	0.00252498	0.00174028	0.0029638	0.00231762	0.00094162	0.00263283	0.00255692	0.00143922	0.00110341	0.00247001	0.00159521	0.00668066
Eukaryota	Viridiplantae	Streptophyta	Unknown CLASS	Fabales	Fabaceae	0.000665652	0.00023015	0.00735202	0.000116347	0.000231449	0.000410434	0.000354711	0.000339624	0.000245674	0.000109872	0.0785782	0.000825924	0.000276192	0.000386673	0	0.000136631	9.87362e-05	0	0	0.000396511	0.00025191	3.72884e-05	0.000228545	0.000324215	0.000154065	0.000148024	0.000775494	0.00034257	0.000130452	0.000123294	0.0107141	0.00071736	0.000216427	0.00466395	0.000252239	0.000263366	0	0.000368596	0.000182637	9.59478e-05	0.000306504	0.00100817	0.00120613	0.000572628
Archaea	Unknown KINGDOM	Euryarchaeota	Methanococci	Methanococcales	Methanocaldococcaceae	0.0034709	0.00414269	0.00263919	0.00628272	0.00157386	0.00218898	0.00180902	0.00261996	0.0018952	0.00285667	0.0032097	0.00247777	0.00331431	0.00238448	0.00334697	0.00314251	0.0024684	0.00259004	0.0033761	0.00244515	0.00205727	0.00108136	0.00182836	0.00243161	0.00169472	0.00152958	0.00258498	0.0018651	0.00182632	0.00172612	0.00171426	0.00251076	0.00241677	0.00160106	0.004225	0.00189623	0.00147969	0.00421252	0.00243516	0.00115137	0.00199228	0.00141143	0.00202319	0.00324489
Bacteria	Unknown KINGDOM	Bacteroidetes	Bacteroidia	Bacteroidales	Bacteroidaceae	0.0020445	0.00466053	0.00370743	0.00279232	0.00194417	0.00228019	0.00156073	0.00145553	0.00136876	0.00225238	0.00237756	0.00252636	0.00386669	0.00277115	0.000557828	0.00163957	0.00256714	0.00172669	0.00185685	0.00337034	0.000965656	0.000820345	0.00205691	0.00162107	0.00242653	0.00128287	0.00277886	0.00129415	0.00100013	0.00156173	0.00176783	0.00245098	0.00133463	0.00191431	0.00346828	0.00126416	0.00121065	0.00394924	0.00280044	0.00163111	0.00186967	0.00206674	0.00198428	0.00305402
Bacteria	Unknown KINGDOM	Proteobacteria	Alphaproteobacteria	Rhizobiales	Rhizobiaceae	0.00232978	0.00356732	0.00251351	0.00255963	0.00231449	0.00259942	0.00276674	0.00213478	0.00157934	0.00258199	0.00261531	0.00252636	0.0023016	0.00315783	0.00223131	0.0017762	0.0024684	0.00222003	0.00118163	0.00270949	0.00226719	0.00100679	0.00337104	0.00235056	0.0023495	0.00187497	0.00284348	0.00251218	0.00226116	0.00164393	0.00332137	0.00286944	0.00234462	0.0018795	0.00290074	0.00284435	0.00161421	0.0027908	0.00127846	0.00172706	0.00137927	0.00105857	0.00182865	0.00229051
Eukaryota	Fungi	Ascomycota	Saccharomycetes	Saccharomycetales	Saccharomycetaceae	0.0034709	0.00299195	0.00295337	0.00314136	0.00263852	0.00264502	0.0018445	0.00155257	0.00154424	0.00236225	0.00356633	0.0015061	0.00276192	0.00225559	0.00353291	0.00259598	0.00276461	0.00197336	0.00151924	0.00165213	0.00319086	0.00152882	0.00171409	0.00117528	0.00231098	0.00148024	0.00187411	0.0022838	0.00186981	0.00135624	0.00149997	0.00286944	0.00173141	0.00163586	0.00201791	0.00268633	0.00363196	0.0024222	0.00310483	0.00217482	0.00174707	0.00166347	0.00194537	0.00381752
Bacteria	Unknown KINGDOM	Proteobacteria	Gammaproteobacteria	Vibrionales	Vibrionaceae	0.00280525	0.00241657	0.00157094	0.00383944	0.00189788	0.00196096	0.00102866	0.0013585	0.00115818	0.00164808	0.00142653	0.00213769	0.00377463	0.00148225	0.00316103	0.00150294	0.0024684	0.00098668	0.00270088	0.00231298	0.00193131	0.00111865	0.00285682	0.00170213	0.00184878	0.00217102	0.00252036	0.0015606	0.00178284	0.00168502	0.00208925	0.00280966	0.00151499	0.00194911	0.0029638	0.00279168	0.00134517	0.00273814	0.00225253	0.00131129	0.00134862	0.00216756	0.0015563	0.00419927
Bacteria	Unknown KINGDOM	Proteobacteria	Betaproteobacteria	Burkholderiales	Burkholderiaceae	0.00166413	0.00166858	0.00175946	0.0034904	0.000925797	0.00164174	0.00141884	0.00087332	0.000982698	0.00142834	0.000832145	0.000825924	0.00184128	0.00122446	0.00185943	0.000956415	0.000888626	0.00098668	0.00101283	0.000859107	0.00256109	0.000596614	0.00262827	0.00360689	0.00269615	0.000937485	0.00232648	0.00319732	0.00300039	0.00349334	0.00123212	0.00215208	0.00180356	0.000835335	0.00220709	0.00205425	0.000807103	0.00152704	0.00152198	0.00252663	0.000459756	0.0012098	0.000894872	0.000190876
Bacteria	Unknown KINGDOM	Bacteroidetes	Bacteroidia	Bacteroidales	Porphyromonadaceae	0.000523013	0.00155351	0.000816891	0.0017452	0.00217562	0.00652134	0.00315692	0.00116443	0.000737023	0.000714168	0.00142653	0.00102026	0.000368256	0.000580009	0.000557828	0.00218609	0.000493681	0.0101135	0.00320729	0.00105736	0.00125955	0.00395257	0.001257	0.00340426	0.00142511	0.000641437	0.00206799	0.00148447	0.00230465	0.00246589	0.00160711	0.00280966	0.0011182	0.00087014	0.00119813	0.000948117	0.00457358	0.00115844	0.00200901	0.00131129	0.00131797	0.0012098	0.00334604	0.00248139
Bacteria	Unknown KINGDOM	Thermotogae	Thermotogae	Thermotogales	Thermotogaceae	0.00123621	0.000920598	0.000816891	0.0017452	0.00106467	0.00104889	0.000886776	0.00160109	0.000772119	0.00148327	0.00142653	0.00102026	0.00147302	0.00116002	0.000557828	0.000956415	0.000592417	0.000863345	0.00202566	0.00145387	0.00260307	0.00115594	0.00154268	0.00137791	0.00134807	0.000740119	0.00129249	0.00140834	0.000956647	0.000986355	0.00289281	0.0017934	0.00245284	0.00107897	0.00163955	0.00221227	0.000807103	0.00273814	0.00121758	0.0014712	0.00101146	0.00186511	0.00178974	0.00152701
Eukaryota	Fungi	Ascomycota	Eurotiomycetes	Onygenales	Arthrodermataceae	0.000665652	0.000920598	0.000502702	0.00162885	0.00124983	0.00036483	0.00031924	0.000339624	0.000315867	0.00027468	0.000832145	0.000485838	0.00119683	0.000451118	0	0.000273261	0.000592417	0.000123335	0.00033761	0.00145387	0.00222521	0.000186442	0.00222832	0.0010537	0.00142511	0.00138156	0.00264961	0.00255024	0.00252207	0.00242479	0.000589275	0.00197274	0.00129856	0.000348056	0.00372052	0.002739	0	0.00126376	0.00200901	0.00159913	0.00217618	0.000957758	0.000583612	0.000190876
Bacteria	Unknown KINGDOM	Firmicutes	Bacilli	Lactobacillales	Lactobacillaceae	0.00194941	0.00207135	0.00138243	0.00197789	0.00180531	0.00150493	0.00166714	0.00121294	0.00115818	0.0021425	0.00142653	0.00199193	0.00174922	0.00257782	0.0013016	0.00150294	0.00157978	0.00111002	0.000675219	0.00218081	0.00130154	0.000447461	0.00131414	0.00154002	0.00157917	0.0014309	0.00129249	0.00091352	0.00100013	0.000739767	0.00171426	0.00191296	0.000901778	0.000835335	0.00170261	0.00105346	0.000807103	0.00126376	0.00176549	0.00086353	0.000950162	0.000705716	0.0010505	0.000954381
Bacteria	Unknown KINGDOM	Firmicutes	Clostridia	Clostridiales	Peptostreptococcaceae	0.00209205	0.00212888	0.000314189	0.00116347	0.0027311	0.00150493	0.0013479	0.00499733	0.00115818	0.0013734	0.000237756	0.000923092	0.00248573	0.00128891	0.00111566	0.00232272	0.00167851	0.00074001	0.00033761	0.000991277	0	0.000335595	0.000742772	0.000283688	0.00084736	0.00128287	0.000323123	0.000304507	0.000347871	0.000904159	0.00241067	0.00083692	0.00248891	0.00100936	0.000504477	5.26732e-05	0.000538068	0.00105313	0.00213077	3.19826e-05	0.00144057	0.000756125	0.000972687	0.00133613
Eukaryota	Metazoa	Chordata	Mammalia	Unknown ORDER	Bovidae	0.000665652	0.000632911	0.000377027	0.000581734	0.000601768	0.000501642	0.000425653	0.00043666	0.00372021	0.00296654	0.00178317	0.00038867	0.000276192	0.0007089	0.000371885	0	0.000888626	0.000616675	0.000168805	0.00026434	0.00440843	0.00134238	0.000114273	0.000567376	0.00173324	0.000345389	0.00180949	0.000951583	0.000304388	0.000945257	0.00208925	0.00221186	0.00064928	0.00031325	0.000189179	0.000421385	0.00134517	0.00489706	0.000121758	0.000319826	0.000183902	0.000201633	0.000427982	0.00133613
Bacteria	Unknown KINGDOM	Tenericutes	Mollicutes	Mycoplasmatales	Mycoplasmataceae	0.00147394	0.00264672	0.000942566	0.00127981	0.00166643	0.00150493	0.00131243	0.00116443	0.00129857	0.00164808	0.00285307	0.00121459	0.00101271	0.00186892	0.00111566	0.0017762	0.00128357	0.00209669	0.00151924	0.00151996	0.00100764	0.00175255	0.000685636	0.00133739	0.000500713	0.00157892	0.00122787	0.000418697	0.00100013	0.000904159	0.00123212	0.0011956	0.00108213	0.000904946	0.00195485	0.000684751	0.00188324	0.000947817	0.00103495	0.000415774	0.00165512	0.000806533	0.00112832	0.000763504
Eukaryota	Fungi	Ascomycota	Eurotiomycetes	Eurotiales	Trichocomaceae	0.00137885	0.00149597	0.00131959	0.000581734	0.000740638	0.000592849	0.000957719	0.00043666	0.00101779	0.00054936	0.00332858	0.000680173	0.000920641	0.00128891	0.0013016	0.000819784	0.000888626	0.00135669	0.00101283	0.00118953	0.00138551	0.000969498	0.000971318	0.0012158	0.00100143	0.000986826	0.00174486	0.00144641	0.00113058	0.00045208	0.00219639	0.00083692	0.00180356	0.000522084	0.00119813	0.00105346	0.00147969	0.00152704	0.00127846	0.000671635	0.00073561	0.000655308	0.0015563	0.00209964
Bacteria	Unknown KINGDOM	Firmicutes	Clostridia	Clostridiales	Eubacteriaceae	0.0021396	0.00310702	0.000879729	0.00325771	0.000740638	0.000820868	0.000709421	0.000679249	0.0018952	0.00291161	0.00154541	0.00340086	0.00184128	0.00206225	0.00316103	0.00163957	0.00207346	0.000616675	0.000675219	0.000793021	0.00025191	0.000111865	0.000742772	0.000567376	0.00134807	0.00222036	0.000904743	0.00079933	0.00021742	0.000410981	0.000642846	0.0008967	0.000829636	0.00111378	0.00107201	0.00105346	0.000134517	0.000842504	0.000487033	0.00134327	0.000551707	0.000554491	0.000544705	0.00133613
Eukaryota	Fungi	Ascomycota	Schizosaccharomycetes	Schizosaccharomycetales	Schizosaccharomycetaceae	0.00137885	0.000805524	0.00144527	0.00197789	0.000833218	0.00104889	0.000744892	0.000582213	0.00101779	0.000878976	0.000713267	0.00102026	0.00165715	0.00180447	0.00111566	0.000273261	0.000888626	0.00074001	0.00168805	0.000925192	0.00109161	0.000372884	0.00159982	0.00129686	0.00138659	0.00039473	0.00142174	0.000875457	0.00100013	0.00127404	0.00160711	0.0020923	0.000937849	0.000904946	0.00100895	0.00105346	0.000807103	0.00179032	0.00133934	0.00102344	0.00116471	0.000705716	0.000505797	0.000763504
Eukaryota	Metazoa	Chordata	Aves	Galliformes	Phasianidae	0.00133131	0.00172612	0.00477567	0.000116347	0.000462899	0.000501642	0.000177355	0.00043666	0.000245674	0.00115366	0	0.000242919	9.20641e-05	0.000128891	0.000185943	0.000273261	0.000197472	0.00024667	0.00033761	0.000925192	0.000377865	0.000745768	0.000228545	0.00137791	0.00269615	0.00039473	0.00071087	0.000989647	0.000608775	0.000205491	0.000857128	0.00017934	0.000577138	0.00031325	0.000441418	0.00442455	0.00363196	0.00373861	0.000426154	0.000671635	0.00613008	0.000151225	0.00015563	0.00114526
Bacteria	Unknown KINGDOM	Firmicutes	Clostridia	Thermoanaerobacterales	Thermoanaerobacterales Family III. Incertae Sedis	0.00133131	0.00322209	0.00194797	0.0034904	0.000879507	0.0012313	0.00138337	0.00111591	0.000912505	0.000769104	0.000713267	0.00155468	0.00220954	0.000902236	0.000929714	0.00122968	0.000691153	0.00111002	0.00151924	0.00158604	0.00033588	0.000298307	0.00137127	0.000364742	0.000462196	0.00197365	0.00109862	0.000647077	0.000391355	0.000328785	0.000428564	0.00197274	0.00108213	0.00100936	0.00182873	0.000632078	0.000403551	0.00168501	0.000547912	0.000479739	0.000827561	0.000756125	0.000817057	0.000381752
Archaea	Unknown KINGDOM	Euryarchaeota	Thermococci	Thermococcales	Thermococcaceae	0.00147394	0.00218642	0.0018223	0.00034904	0.00162014	0.000729661	0.00191544	0.000776285	0.00066683	0.000878976	0.000594389	0.000874508	0.000552384	0.000902236	0.00111566	0.000956415	0.00118483	0.00135669	0.000675219	0.000660851	0.00247712	0.000633903	0.00108559	0.000729483	0.000962909	0.00039473	0.00155099	0.000723203	0.00239162	0.000369883	0.000803557	0.00077714	0.000685352	0.000730918	0.000819776	0.00115881	0.00161421	0.000631878	0.000852307	0.00172706	0.00177772	0.000655308	0.000583612	0.000381752
Bacteria	Unknown KINGDOM	Chlorobi	Chlorobia	Chlorobiales	Chlorobiaceae	0.00156904	0.00155351	0.00144527	0.00232693	0.000879507	0.000592849	0.000815834	0.00116443	0.000807216	0.000714168	0.00154541	0.00121459	0.00119683	0.00128891	0.000929714	0.00204946	0.00187599	0.00098668	0.00135044	0.00105736	0.00033588	0.000783056	0.000799909	0.000607903	0.000346647	0.00108551	0.00122787	0.000723203	0.000565291	0.000575374	0.000589275	0.00131516	0.000468925	0.000974557	0.00126119	0.000579405	0.000538068	0.0015797	0.000730549	0.000607669	0.00079691	0.000957758	0.00112832	0.00133613
Bacteria	Unknown KINGDOM	Deinococcus-Thermus	Deinococci	Thermales	Thermaceae	0.000618106	0.00120828	0.00056554	0.00186155	0.000972087	0.00104889	0.000957719	0.000727767	0.000491349	0.000714168	0.000594389	0.000242919	0.0012889	0.00193336	0.000929714	0.00109304	0.000592417	0.00197336	0.00185685	0.000991277	0.000797716	0.000633903	0.000799909	0.000851064	0.00042368	0.000690778	0.00116324	0.00034257	0.00121755	0.000493178	0.000696416	0.00155428	0.000288569	0.000661307	0.00100895	0.000526732	0.00161421	0.0012111	0.00103495	0.000415774	0.000643658	0.0006049	0.00101159	0.00114526
Bacteria	Unknown KINGDOM	Actinobacteria	Actinobacteria	Actinomycetales	Streptomycetaceae	0.00109357	0.00143844	0.00056554	0.000814427	0.000879507	0.000592849	0.000638479	0.000582213	0.000596638	0.00082404	0.00142653	0.000777341	0.00110477	0.00148225	0.000371885	0.000956415	0.000888626	0.00074001	0.000675219	0.000462596	0.000587791	0.000484749	0.000457091	0.00129686	0.000462196	0.00108551	0.00109862	0.000723203	0.000869679	0.000698668	0.000535705	0.0011956	0.000865707	0.000452473	0.00113507	0.00142217	0.00147969	0.00110579	0.000791428	0.000351809	0.000888862	0.000252042	0.000972687	0.000763504
Bacteria	Unknown KINGDOM	Spirochaetes	Spirochaetia	Spirochaetales	Spirochaetaceae	0.00137885	0.000632911	0.00157094	0.000930774	0.00129612	0.000638453	0.000886776	0.00043666	0.000842312	0.00104378	0.000475511	0.000923092	0.000920641	0.0007089	0.000743771	0.000273261	0.000493681	0.00074001	0.00033761	0.000991277	0.00138551	0.000522037	0.000914181	0.000364742	0.00103994	0.000986826	0.00103399	0.00117996	0.000739227	0.000863061	0.000642846	0.00131516	0.000901778	0.000452473	0.000756716	0.000632078	0.000538068	0.00142173	0.00158286	0.00143922	0.000980813	0.000554491	0.000700335	0.000572628
Viruses	Unknown KINGDOM	Unknown PHYLUM	Unknown CLASS	Caudovirales	Myoviridae	0.00104602	0.0013809	0.000754053	0.00186155	0.000879507	0.000684057	0.00067395	0.00087332	0.00066683	0.00082404	0.00130766	0.000971676	0.00239367	0.0014178	0.000371885	0.000546523	0.0010861	0.00049334	0.000168805	0.000462596	0.000671761	0.000633903	0.000799909	0.00064843	0.00103994	0.000493413	0.00180949	0.000761267	0.0010871	0.000616472	0.000535705	0.00101626	0.000721423	0.00031325	0.00113507	0.00100079	0.000538068	0.00194829	0.00103495	0.0007356	0.000153252	0.00030245	0.00046689	0.00152701
Bacteria	Unknown KINGDOM	Proteobacteria	Epsilonproteobacteria	Campylobacterales	Helicobacteraceae	0.0014264	0.00212888	0.00157094	0.00104712	0.00115725	0.00100328	0.000922247	0.00126146	0.00136876	0.00170302	0.000713267	0.000728757	0.00184128	0.00161114	0.00148754	0.00109304	0.00148104	0.000863345	0.000844024	0.00026434	0.000545806	0.000596614	0.000457091	0.00077001	0.000308131	0.00103617	0.000840119	0.00057095	0.000652259	0.000369883	0.00101784	0.00053802	0.00032464	0.000800529	0.00107201	0.000632078	0.000538068	0.000895161	6.08791e-05	0.000351809	0.000643658	0.000806533	0.000350167	0.000763504
Eukaryota	Metazoa	Arthropoda	Insecta	Diptera	Drosophilidae	0.000950932	0.00115075	0.00150811	0.0017452	0.000416609	0.000547246	0.000532066	0.000727767	0.000701927	0.00109872	0.00332858	0.000825924	0.000552384	0.000773345	0.00185943	0.000956415	0.00187599	0.00111002	0.00185685	0.000594766	0.000545806	0.000261019	0.00102845	0.000567376	0.000500713	0.000789461	0.000581621	0.000609013	0.00100013	0.000287687	0.00101784	0.00077714	0.000541067	0.000452473	0.000693656	0.000790097	0.000538068	0.00136907	0.000243516	0.000287843	0.000337154	0.0006049	0.000544705	0.00190876
Bacteria	Unknown KINGDOM	Chloroflexi	Dehalococcoidia	Dehalococcoidales	Dehalococcoidaceae	0.000380373	0.000287687	0.000188513	0.000581734	0.000462899	0.000319227	0.000248297	0.000485178	0.000175482	0.000439488	0.000713267	0.000242919	0.000736513	0.000515564	0.000743771	0.000409892	0.000296209	0.00024667	0.000506415	0.000660851	0.00209925	0.000111865	0.000571363	0.000405268	0.000462196	0.000493413	0.00116324	0.000837393	0.00100013	0.000246589	0.000267852	0.00143472	0.000468925	0.000208834	0.0029638	0.00158019	0.000134517	0.000421252	0.00066967	0.000607669	0.000183902	0.000655308	0.000389075	0.00133613
Eukaryota	Metazoa	Nematoda	Chromadorea	Rhabditida	Rhabditidae	0.000427919	0.00109321	0.00106824	0.000581734	0.000509189	0.000547246	0.000638479	0.000630731	0.000737023	0.00082404	0.000832145	0.000631589	0.000644449	0.0007089	0.000929714	0.000683153	0.000888626	0.000370005	0.00118163	0.00145387	0.000587791	0.000186442	0.0006285	0.00077001	0.000924392	0.000641437	0.00122787	0.000494823	0.000434839	0.00065757	0.000803557	0.00107604	0.000613209	0.000591695	0.000882835	0.000632078	0.00094162	0.00131641	0.000791428	0.000895513	0.000521057	0.000201633	0.000661427	0.00267227
Bacteria	Unknown KINGDOM	Proteobacteria	Alphaproteobacteria	Rhodobacterales	Rhodobacteraceae	0.000998479	0.00126582	0.000691215	0.000814427	0.000833218	0.000592849	0.00127696	0.000921838	0.000315867	0.0013734	0.00154541	0.00155468	0.000736513	0.000837791	0.000743771	0.00150294	0.000789889	0.00024667	0.000675219	0.000594766	0.000713746	0.000447461	0.000914181	0.000567376	0.000539229	0.000296048	0.00129249	0.000723203	0.000956647	0.000164393	0.000964268	0.0011956	0.00032464	0.000522084	0.00126119	0.000579405	0.00107614	0.000473909	0.000913186	0.00115137	0.000337154	0.000403266	0.000700335	0.00171788
Bacteria	Unknown KINGDOM	Proteobacteria	Deltaproteobacteria	Desulfovibrionales	Desulfovibrionaceae	0.00175922	0.000690449	0.000628378	0.00209424	0.000740638	0.000547246	0.000603008	0.000533696	0.000912505	0.000439488	0.000713267	0.000534422	0.00147302	0.00109557	0.000929714	0.000409892	0.00148104	0.00148002	0.00118163	0.00138779	4.19851e-05	0.000447461	0.000514227	0.000364742	0.000462196	0.000740119	0.000904743	0.00011419	0.000434839	0.000616472	5.35705e-05	0.00095648	0.000468925	0.000661307	0.00151343	0.000158019	0.00094162	0.000631878	0.000365275	0.000159913	0.000429106	0.000504083	0.000350167	0.00171788
Bacteria	Unknown KINGDOM	Actinobacteria	Actinobacteria	Bifidobacteriales	Bifidobacteriaceae	0.000665652	0.00247411	0.00119392	0.00069808	0.00115725	0.000912076	0.00262486	0.000485178	0.00101779	0.000384552	0.000832145	0.000437254	0.00276192	0.00199781	0.000185943	0.000136631	0.000592417	0.000123335	0.000168805	0.00151996	0.000419851	0.000410172	0.0018855	0.000405268	0.00142511	0.000542754	0.000516996	0.000152253	0.000347871	0.000164393	0.000589275	0.0020923	0.00115428	0.000278445	0.00157649	0.000316039	0	0.0020536	0.000852307	0.000223878	0.000398455	0.000201633	0.00046689	0.000381752
Bacteria	Unknown KINGDOM	Proteobacteria	Gammaproteobacteria	Xanthomonadales	Xanthomonadaceae	0.000618106	0.00195627	0.000691215	0.000930774	0.000648058	0.000592849	0.000532066	0.000679249	0.000561541	0.000604296	0.000951022	0.000583005	0.000644449	0.00135335	0.000185943	0.000819784	0.000789889	0.00098668	0.000675219	0.000660851	0.000293895	0.000335595	0.000914181	0.000607903	0.00042368	0.000493413	0.00109862	0.000647077	0.000782711	0.000410981	0.000857128	0.00083692	0.000577138	0.000696112	0.00151343	0.000263366	0.000807103	0.0015797	0.000608791	0.000575687	9.19512e-05	0.0006049	0.000855965	0.000381752
Bacteria	Unknown KINGDOM	Firmicutes	Clostridia	Clostridiales	Peptococcaceae	0.000760746	0.000920598	0.00056554	0.00151251	0.000555478	0.000547246	0.000496595	0.000582213	0.000772119	0.000769104	0.000713267	0.000728757	0.000920641	0.000386673	0.000185943	0.000409892	0.000888626	0	0.000168805	0.00105736	0.000755731	0.000559326	0.00114273	0.000567376	0.000462196	0.000937485	0.00103399	0.000494823	0.000565291	0.000328785	0.000642846	0.00101626	0.000721423	0.000800529	0.00100895	0.000684751	0.000134517	0.000842504	0.0011567	0.000479739	0.000521057	0.00100817	0.000544705	0.00114526
Bacteria	Unknown KINGDOM	Proteobacteria	Alphaproteobacteria	Rhizobiales	Brucellaceae	0.000950932	0.000632911	0.00056554	0.00104712	0.000370319	0.000501642	0.000638479	0.000388142	0.000491349	0.000384552	0.000713267	0.000631589	0.00119683	0.000644454	0.000557828	0.000819784	0.000394945	0.00111002	0.000844024	0.00105736	0.000629776	0.000186442	0.000742772	0.000405268	0.000500713	0.000246706	0.00148636	0.000609013	0.000826195	0.000328785	0.000482134	0.00041846	0.000360711	0.000174028	0.00107201	0.000474058	0.000403551	0.000895161	0.000730549	0.000319826	0.000275854	0.00141143	0.000389075	0.000954381
Bacteria	Unknown KINGDOM	Firmicutes	Bacilli	Bacillales	Listeriaceae	0.000950932	0.00132336	0.00138243	0.00127981	0.000370319	0.000775265	0.000922247	0.000533696	0.000631734	0.000494424	0.000713267	0.000923092	0.00184128	0.00128891	0.000371885	0.00136631	0.00118483	0.00049334	0.00033761	0.000991277	0.000755731	0.000372884	0.000742772	0.000405268	0.000308131	0.00108551	0.000775494	0.00022838	0.000434839	0.000205491	0.000482134	0.00101626	0.000829636	0.000696112	0.000693656	0.000368712	0.000672585	0.000368596	0.000730549	0.000255861	0.000643658	0.000705716	0.00077815	0.000381752
Bacteria	Unknown KINGDOM	Bacteroidetes	Flavobacteriia	Flavobacteriales	Flavobacteriaceae	0.000808292	0.000632911	0.00056554	0.000930774	0.000277739	0.000684057	0.000815834	0.000776285	0.000631734	0.000219744	0.000832145	0.000583005	0.000920641	0.000644454	0.000557828	0.000546523	0.000691153	0.00098668	0.000168805	0.000925192	0.000503821	0.00111865	0.00165695	0.00101317	0.00161769	0.000592096	0.00103399	0.00057095	0.000478323	0.000575374	0.000589275	0.00095648	0.000685352	0.000730918	0.000630597	0.00147485	0.00107614	0.00100047	0.000243516	0.000351809	0.00073561	0.000352858	0.00077815	0.00114526
Bacteria	Unknown KINGDOM	Actinobacteria	Actinobacteria	Actinomycetales	Corynebacteriaceae	0.00104602	0.000978136	0.0010054	0.00104712	0.000740638	0.000912076	0.00102866	0.000921838	0.000807216	0.00131846	0.00118878	0.000874508	0.000920641	0.00167558	0.00167348	0.00136631	0.00148104	0.000863345	0.00101283	0.0013217	0.000503821	0.000261019	0.000514227	0.000324215	0.000577745	0.000986826	0.000387747	0.00045676	0.00021742	0.000493178	0.000857128	0.00095648	0.000541067	0.000452473	0.000756716	0	0.000538068	0.000368596	0.000487033	0.000383791	0.000490406	0.000554491	0.000544705	0.000190876
Bacteria	Unknown KINGDOM	Proteobacteria	Gammaproteobacteria	Alteromonadales	Shewanellaceae	0.000903385	0.000920598	0.000754053	0.00069808	0.000555478	0.000775265	0.000567537	0.000533696	0.000315867	0.000878976	0.00118878	0.000485838	0.000552384	0.000580009	0.000557828	0.000273261	0.000888626	0.000370005	0.000506415	0.00165213	0.000503821	0.000559326	0.000571363	0.000607903	0.000693294	0.000345389	0.00109862	0.000989647	0.000782711	0.000616472	0.00128569	0.00065758	0.00064928	0.000348056	0.000819776	0.00131683	0.000538068	0.000789848	0.000974066	0.000447756	0.000459756	0.000504083	0.000544705	0.000381752
Bacteria	Unknown KINGDOM	Firmicutes	Negativicutes	Selenomonadales	Veillonellaceae	0.00014264	0.000632911	0.000314189	0.000116347	0.00222191	0.000136811	7.09421e-05	0.000145553	0	0	0	0	0.000276192	0.000128891	0	0	0	0	0	0.00198255	0	0	0.00348532	0	0	0.000296048	0.00193874	0	0	0	0	0.00047824	7.21423e-05	0	0	0	0	0	0.00127846	0	0	0	0	0
Bacteria	Unknown KINGDOM	Proteobacteria	Alphaproteobacteria	Rhizobiales	Bradyrhizobiaceae	0.000570559	0.000690449	0.000754053	0.000232693	0.000555478	0.00036483	0.000425653	0.000582213	0.00038606	0.00115366	0.000475511	0.000583005	0.00110477	0.000322227	0.000557828	0.000273261	0.000789889	0.00049334	0.000506415	0.000528681	0.00117558	0.000522037	0.0006285	0.000932118	0.00107846	0.000246706	0.00116324	0.000532887	0.000826195	0.000575374	0.000535705	0.00017934	0.000613209	0.000417667	0.000630597	0.000948117	0.000134517	0.000315939	0.000913186	0.000639652	0.000551707	0.000504083	0.000427982	0.000572628
Archaea	Unknown KINGDOM	Euryarchaeota	Methanobacteria	Methanobacteriales	Methanobacteriaceae	0.000760746	0.000747986	0.000691215	0.000581734	0.000694348	0.000638453	0.000532066	0.000727767	0.000456252	0.00131846	0.00178317	0.000825924	0.00119683	0.000515564	0.000743771	0.000136631	0.0010861	0.00111002	0.000506415	0.00158604	0.00033588	0.000410172	0.000285682	0.000972644	0.000269614	0.000197365	0.000581621	0.000304507	0.000347871	0.000205491	0.000482134	0.00077714	0.000360711	0.000626501	0.000882835	0.000316039	0.000672585	0.00100047	0.00066967	0.000319826	0.000582358	0.00030245	0.000544705	0.000763504
Eukaryota	Viridiplantae	Streptophyta	Unknown CLASS	Asterales	Asteraceae	0.00109357	0.000920598	0.00270202	0	0	0.00136811	0	0	0	0.00054936	0.00356633	0	0	0	0	0.00163957	0	0.00185002	0.00270088	6.60851e-05	0	0.000559326	0	0.00190476	0	0	0	0	0	0	0.000107141	0	0.00191177	0.00132261	0.000252239	0	0.00094162	5.26565e-05	0	0.000447756	0	0	0.00603066	0
Bacteria	Unknown KINGDOM	Cyanobacteria	Unknown CLASS	Nostocales	Nostocaceae	0.000855839	0.000920598	0.00219932	0.000465387	9.25797e-05	0.000638453	0.000354711	0.00101887	0.000491349	0.000714168	0.00142653	0.00111743	0.000368256	6.44454e-05	0.000557828	0.000546523	0.000789889	0.00049334	0.00118163	0.000396511	0.000545806	0.000186442	0.000342818	0.00064843	0.000231098	0.000493413	0.000775494	0.00057095	0.00021742	0.000328785	0.000535705	0.00011956	0.000396782	0.000661307	0.000882835	0.000316039	0.000134517	0.000947817	0.000791428	0.000255861	0.000214553	0.000201633	0.000700335	0.000954381
Bacteria	Unknown KINGDOM	Aquificae	Aquificae	Aquificales	Aquificaceae	0.000665652	0.00132336	0.00125676	0.00069808	0.000277739	0.000319227	0.000212826	0	0.00066683	0.000714168	0.00118878	0.000242919	0.000552384	0.000580009	0	0.000409892	0.000394945	0.000616675	0.000506415	0.000991277	0.00033588	0.000410172	0.000399954	0.000526849	0.000308131	4.93413e-05	0.000516996	0.00034257	0	0.000123294	0.000482134	0.00065758	0.000468925	0.000382862	0.000441418	0.000790097	0.00094162	0.00305408	0.000304395	3.19826e-05	0.000367805	0.000504083	0.000350167	0
Eukaryota	Fungi	Ascomycota	Saccharomycetes	Saccharomycetales	Debaryomycetaceae	0.000570559	0.000575374	0.000691215	0.00069808	0.000694348	0.000547246	0.000461124	0.000582213	0.000456252	0.00054936	0.00154541	0.000680173	0.00046032	0.000515564	0.00111566	0.00109304	0.0010861	0.000616675	0.00151924	0.000660851	0.00033588	0.000559326	0.000457091	0.000364742	0.000577745	0.000592096	0.000646245	0.00034257	0.00173936	0.000493178	0.000910698	0.00023912	0.000721423	0.000382862	0.000315298	0.000368712	0.000538068	0.000368596	0.000730549	0.000383791	0.000275854	0.000756125	0.000739242	0.000190876
Bacteria	Unknown KINGDOM	Proteobacteria	Alphaproteobacteria	Rhodospirillales	Rhodospirillaceae	0.000523013	0.000920598	0.00056554	0.00139616	0.000324029	0.000319227	0.000354711	0.000388142	0.000315867	0.000604296	0.000356633	0.000242919	0.00101271	0.000128891	0.000743771	0.000683153	0.000691153	0.000863345	0.000844024	0.000528681	0.000461836	0.000149154	0.000514227	0.000526849	0.000154065	0.000641437	0.000904743	0.00045676	0.000565291	0.000534276	0.00128569	0.00095648	0.000577138	6.96112e-05	0.000945895	0.000158019	0.000807103	0.000421252	0.000547912	0.000351809	0.000459756	0.000554491	0.000233445	0.000954381
Eukaryota	Metazoa	Chordata	Amphibia	Anura	Pipidae	0.00014264	0.000632911	0.00056554	0.00069808	0.000324029	0.000228019	0.000532066	0.00043666	0.000491349	0.00104378	0.000594389	0.000534422	0.000184128	0.000515564	0	0.000683153	0.000592417	0.00049334	0.00101283	0.00138779	0.000629776	0.000484749	0.000914181	0.00149949	0.000539229	0.000444072	0.000581621	0.000152253	0.000478323	0.000410981	0.000696416	0.00071736	0.000613209	0.000765723	0.000756716	0.000579405	0.000538068	0.000631878	0.000426154	0.000383791	0.000459756	0.000655308	0.000350167	0.000381752
Bacteria	Unknown KINGDOM	Proteobacteria	Betaproteobacteria	Neisseriales	Neisseriaceae	0.000950932	0.000920598	0.000879729	0.00034904	0.000648058	0.000410434	0.00102866	0.000679249	0.00066683	0.000439488	0.00130766	0.000340086	0.000920641	0.000644454	0	0	0.000493681	0.000370005	0.000506415	0.00112345	0.000797716	0.000372884	0.000399954	0.000324215	0.00042368	0.000444072	0.000258498	0.000266443	0.000391355	0.000164393	0.000749987	0.00065758	0.000829636	0.000417667	0.000252239	0.000737424	0.00094162	0.000421252	0.000304395	0.000351809	0.00079691	0.000453675	0.000194537	0.000190876
Bacteria	Unknown KINGDOM	Proteobacteria	Epsilonproteobacteria	Campylobacterales	Campylobacteraceae	0.000332826	0.000690449	0.0010054	0.000465387	0.000277739	0.000319227	0.00067395	0.000388142	0.000245674	0.000219744	0.00154541	0.000485838	0.000828577	0.000322227	0	0.000136631	0.000197472	0.00160336	0.000168805	0.000330426	8.39701e-05	0.000522037	0.000457091	0.00064843	3.85164e-05	0.000345389	0.000516996	0.000190317	8.69679e-05	0.000287687	0.000428564	0.0005978	0.000288569	0.00055689	0.00107201	0	0	0.0040019	0.000547912	6.39652e-05	0.000275854	0.000252042	0.000427982	0
Bacteria	Unknown KINGDOM	Proteobacteria	Alphaproteobacteria	Rickettsiales	Rickettsiaceae	0.000618106	0.000805524	0.000502702	0.000581734	0.000277739	0.000410434	0.000461124	0.000727767	0.000701927	0.000714168	0.000237756	0.000485838	0.000184128	0.000580009	0.000929714	0.000683153	0.000493681	0.00024667	0.000675219	0.000396511	0.00025191	0.000261019	0.000228545	0.00064843	0.000308131	0.000345389	0.000775494	0.000532887	0.000304388	0.000328785	0.000910698	0.00065758	0.000577138	0.000382862	0.000756716	0.000579405	0.000269034	0.000789848	0.000304395	0.000255861	0.000398455	0.00030245	0.00031126	0.000572628
Archaea	Unknown KINGDOM	Euryarchaeota	Halobacteria	Halobacteriales	Halobacteriaceae	0.000237733	0.000747986	0.000691215	0.00139616	0.000277739	0.00036483	0.000390182	0.000339624	0.000526445	0.000769104	0.000356633	0.00038867	0.000552384	0.000322227	0.000371885	0.000273261	0.000888626	0.00098668	0.000506415	0.000462596	0.000377865	0.000186442	0.000342818	0.000567376	0.000154065	0.000542754	0.000452372	0.000532887	0.000304388	0.000246589	0.000214282	0.0008967	0.000468925	0.000174028	0.00107201	0.000474058	0.000269034	0.00310673	0.000243516	0.000159913	0.000367805	0.000453675	0.000350167	0.000572628
Bacteria	Unknown KINGDOM	Proteobacteria	Deltaproteobacteria	Desulfuromonadales	Geobacteraceae	0.000808292	0.000460299	0.000628378	0.000581734	0.000462899	0.00036483	0.000815834	0.000194071	0.000631734	0.000988848	0.000475511	0.000680173	0.000552384	0.000322227	0.000371885	0.000819784	0.000296209	0.00148002	0.00033761	0.00125562	0.000377865	0.000335595	0.000228545	8.10537e-05	0.000115549	0.000148024	0.000840119	0.00011419	0.000173936	0.000123294	0.000214282	0.00047824	0.00064928	0.000382862	0.000252239	0.000474058	0.00107614	0.000421252	6.08791e-05	0.000223878	0.000337154	0.000252042	0.000505797	0.000954381
Archaea	Unknown KINGDOM	Euryarchaeota	Archaeoglobi	Archaeoglobales	Archaeoglobaceae	0.000570559	0.000863061	0.000879729	0.00302501	0.000277739	0.000410434	0.000390182	0.000242589	0.000350963	0.000329616	0.000356633	0.000291503	0.0012889	0.000644454	0	0	0.000394945	0.00049334	0	0.000198255	8.39701e-05	0.000335595	0.000114273	0.000324215	0.00042368	0.000246706	0.00155099	0.00045676	0.000173936	0.000328785	0.000482134	0.00047824	0.000108213	0.000174028	0.00100895	0.000842771	0.000403551	0.00126376	6.08791e-05	0.000159913	0.000183902	0.000806533	0.000505797	0.000381752
Bacteria	Unknown KINGDOM	Firmicutes	Bacilli	Lactobacillales	Enterococcaceae	0.00123621	0.00103567	0.000628378	0.00116347	0.000416609	0.00036483	0.000709421	0.000533696	0.000561541	0.00082404	0.000356633	0.000631589	0.00046032	0.00148225	0.000185943	0.000956415	0.000691153	0.000370005	0.000506415	0.000793021	0.000293895	0.000186442	0.000571363	0.000445795	0.000962909	0.000789461	0.000516996	0.000152253	4.34839e-05	8.21963e-05	0.000428564	0.00053802	0.000216427	0.000382862	0.000567537	0.000210693	0.000403551	0.000263283	0.000791428	0.000383791	0.000367805	0.000252042	0.000272352	0
Bacteria	Unknown KINGDOM	Proteobacteria	Alphaproteobacteria	Rickettsiales	Anaplasmataceae	0.000523013	0.00023015	0.000314189	0.000581734	0.000277739	0.000273623	0.000106413	0.000339624	0.000105289	0.000219744	0.000356633	0.000242919	0.000184128	0.000451118	0.000557828	0.000546523	0.000493681	0.00024667	0.000506415	0.000528681	0.000377865	0.000186442	0.0006285	0.00064843	0.000308131	0.000345389	0.00071087	0.000418697	0.000260904	0.000246589	0.000428564	0.00143472	0.000432854	0.00031325	0.000882835	0.000368712	0	0.00100047	0.000547912	0.000383791	0.000398455	0.000352858	0.000389075	0.000572628
Bacteria	Unknown KINGDOM	Proteobacteria	Alphaproteobacteria	Sphingomonadales	Sphingomonadaceae	0.000237733	0.000575374	0.000942566	0.000581734	9.25797e-05	0.000638453	0.000212826	0.000630731	0.000491349	0.00203263	0.000951022	0.000680173	0.000276192	0.000386673	0.00148754	0.000273261	0.000296209	0.000370005	0.000675219	0.00026434	0.000209925	0.000522037	0.000399954	0.000486322	0.00042368	0.000542754	0.000452372	0.000494823	0.000391355	0.000287687	0.000642846	0.00035868	0.000180356	0.000104417	0.000189179	0.000263366	0.000134517	0.000684535	0.000487033	0.000191896	0.000214553	0.000201633	0.000350167	0.000572628
Bacteria	Unknown KINGDOM	Chlamydiae	Chlamydiia	Chlamydiales	Chlamydiaceae	0.000808292	0.000460299	0.000439864	0.000930774	0.000509189	0.000182415	0.00031924	0.000194071	0.000421156	0.000164808	0.000475511	0.000485838	0.000368256	0.000257782	0.000185943	0.000683153	0.000493681	0	0.00033761	0.000991277	0.000587791	0.00022373	0.0006285	0.000364742	0.00042368	0.000246706	0.000193874	0.00034257	0.000173936	0.000534276	0.000482134	0.00077714	0.000216427	0.000382862	0.000441418	0.000579405	0.000538068	0.000473909	0.000243516	0.000511722	0.000122602	0.000504083	0.000272352	0.000954381
Bacteria	Unknown KINGDOM	Proteobacteria	Betaproteobacteria	Rhodocyclales	Rhodocyclaceae	0.000713199	0.000460299	0.00320472	0.000232693	0.000231449	0.000456038	0.000354711	0.000630731	0	0.000109872	0	0.000777341	0.00046032	0	0.000929714	0.000273261	0.000394945	0.000616675	0.000675219	0	0.00033588	0.000522037	0.000228545	0.000486322	0.000192582	4.93413e-05	0.000516996	0.000152253	0.000304388	0.000410981	0.000482134	0.00017934	0.00032464	0.000139222	0.000252239	0.000210693	0	0.00131641	0.000426154	0.00012793	0.000214553	0.000151225	0.000933779	0.000572628
Eukaryota	Unknown KINGDOM	Unknown PHYLUM	Unknown CLASS	Trichomonadida	Trichomonadidae	0.000190186	0.000517837	0.000879729	0.00069808	0.000231449	0.000228019	0.000177355	0.000145553	0.000140385	0.000384552	0.000356633	0.000242919	0.000552384	0.000128891	0.000371885	0	9.87362e-05	0.00098668	0.000506415	0.000462596	0.000545806	0.000372884	0.000399954	0.000607903	0.000192582	9.86826e-05	0.00071087	0.000266443	0.000173936	8.21963e-05	0	0.00083692	0.000108213	0.000243639	0.000756716	0.000263366	0.000403551	0.000895161	0.000365275	0.000255861	0.00073561	0.00030245	0.000272352	0.000381752
Viruses	Unknown KINGDOM	Unknown PHYLUM	Unknown CLASS	Caudovirales	Siphoviridae	0.000570559	0.00126582	0.000439864	0.000232693	0.000833218	0.000547246	0.000141884	0.000291107	0.000280771	0.000659232	0.000594389	0.00038867	0.000184128	0.000644454	0.000185943	0.000546523	0.000394945	0.00024667	0.00033761	0.00112345	0.00025191	0.000111865	0.000399954	0.000526849	0.000500713	0.000592096	0.000387747	0.000494823	0.000304388	0.000164393	0.000160711	0.00035868	7.21423e-05	0.000382862	0.000378358	0.000421385	0.000134517	0.00142173	0.000913186	0.000223878	0.000275854	0.000705716	0.00015563	0.000190876
Bacteria	Unknown KINGDOM	Fusobacteria	Fusobacteriia	Fusobacteriales	Fusobacteriaceae	0.000237733	0.000460299	0.00056554	0.000814427	0.000277739	0.000273623	0.000390182	0.000242589	0.000421156	0.000494424	0.000237756	0.000340086	0.000552384	0.000451118	0.00111566	0.000136631	0.000592417	0.00049334	0.000675219	0.000396511	0.000209925	0.000149154	0.000342818	0.000243161	0.000192582	0.000148024	0.000775494	0.000190317	0.000304388	0.000369883	0.000535705	0.00035868	0.000180356	0.000243639	0.000441418	0.000210693	0	0.000684535	0.000182637	0.000287843	0.000153252	0.000352858	0.000116722	0.000763504
Bacteria	Unknown KINGDOM	Proteobacteria	Betaproteobacteria	Burkholderiales	Comamonadaceae	0.000190186	0.000402762	0.000314189	0.000465387	0.000462899	0.000501642	0.000496595	0.000145553	0.000210578	0.00054936	0.000475511	0.000534422	0.000184128	0.000451118	0.000371885	0.000273261	0.000493681	0.000370005	0.000506415	0.00013217	0.000461836	0.000298307	0.000171409	0.000283688	0.000231098	0.000148024	0.000387747	0.000532887	8.69679e-05	0.000123294	0.000267852	0.00047824	0.000108213	0.000382862	0.000189179	0.000316039	0.000403551	0.000263283	0.000243516	0.000191896	0.000214553	5.04083e-05	0.000272352	0.00114526
Bacteria	Unknown KINGDOM	Verrucomicrobia	Opitutae	Unknown ORDER	Opitutaceae	0.000380373	0.000575374	0.000377027	0.00104712	0.000370319	0.000273623	0.000177355	0.000242589	0.000245674	0.000329616	0.000713267	0.000340086	0.000644449	0.000451118	0.000185943	0.000683153	0.000691153	0.000370005	0.000675219	0.000594766	0.000293895	0	0.000457091	0.000162107	0.000231098	0.000246706	0.000193874	0.000152253	0.00021742	0.000246589	0.000374993	0.00035868	0.000180356	0.000174028	0.000630597	0.000158019	0.000538068	0.000315939	0.000426154	6.39652e-05	0.000214553	0.00030245	0.000194537	0.000572628
Archaea	Unknown KINGDOM	Euryarchaeota	Methanomicrobia	Methanosarcinales	Methanosarcinaceae	0.000618106	0.000690449	0.000314189	0.000116347	0.000324029	0.00036483	0.000425653	0.000679249	0.000140385	0.000329616	0	0.000291503	0.000644449	0.000386673	0.000371885	0.000273261	9.87362e-05	0.00049334	0.00101283	0.00013217	4.19851e-05	0.000522037	0.000114273	0.000486322	0.000192582	0.000197365	0.000129249	0.000152253	4.34839e-05	0.000246589	0.000910698	5.978e-05	0.000252498	0.000243639	0.000567537	0	0.000807103	0.000684535	0.000182637	0.000159913	0.000306504	0.000201633	0.00046689	0
Bacteria	Unknown KINGDOM	Cyanobacteria	Unknown CLASS	Prochlorales	Prochlorococcaceae	4.75466e-05	0	0.000691215	0.000814427	0.000786928	0.000228019	0.000141884	0.000145553	0.000140385	0.00027468	0.00190204	0.000242919	0.000368256	0.000257782	0.00167348	0.000409892	0.000296209	0.00024667	0.00033761	6.60851e-05	0.000545806	0.000335595	0.000399954	0.000364742	0.000154065	0.000246706	0.000581621	0.00057095	0.00021742	0.000123294	0.000910698	0.00035868	0.000108213	0.000208834	0.000756716	0.000421385	0	0.000473909	0.000121758	0.000287843	3.06504e-05	0.00030245	0.000272352	0.00133613
Bacteria	Unknown KINGDOM	Proteobacteria	Alphaproteobacteria	Rhizobiales	Methylobacteriaceae	0.000190186	0.000287687	0.000314189	0.00069808	0.000185159	0.000228019	0.000425653	0.000291107	0.000280771	0.000494424	0.0010699	0.000583005	0.000368256	0.000193336	0.000929714	0.000273261	0.000197472	0	0	6.60851e-05	0.000209925	0.000335595	0.000342818	0.000162107	0.000154065	0.000345389	0.000258498	0.00022838	0.000130452	0.000369883	0.000696416	0.00053802	0.000396782	0.000348056	0.000378358	0	0.000538068	0.000105313	0.000487033	0.000415774	0.000245203	0.00030245	0.000272352	0.000381752
Bacteria	Unknown KINGDOM	Proteobacteria	Betaproteobacteria	Burkholderiales	Alcaligenaceae	0.000665652	0.000863061	0.00056554	0.000465387	0.00013887	9.12076e-05	0.000177355	0.000242589	0.000140385	0.00054936	0.000713267	0.000340086	0	0.000322227	0	0.000273261	0.000493681	0.00024667	0	0.000528681	0.00016794	0.000149154	0.000228545	0.000283688	0.000192582	0.000197365	0.000452372	0.000418697	0.00021742	0.000205491	0.000428564	0.00035868	0.00032464	0.000626501	0.000378358	0.000316039	0.000134517	0.000421252	0.000304395	0.000319826	0.000337154	0.000201633	0.000350167	0.000572628
Eukaryota	Metazoa	Chordata	Actinopterygii	Cypriniformes	Cyprinidae	0.000475466	0.000517837	0.000628378	0	9.25797e-05	0.000228019	0.000141884	0.000242589	0.000350963	0.000714168	0.000713267	0.000242919	0.000184128	0.000322227	0.000185943	0.000409892	0	0.000123335	0.00033761	0.000991277	0.00033588	0.000298307	0.000342818	0.000891591	0.000269614	0.000197365	0.000323123	0.00022838	8.69679e-05	0.000369883	0.000374993	0.00023912	0.0013707	0.00031325	6.30597e-05	5.26732e-05	0.000403551	0.000315939	0.000121758	0.000287843	0.000367805	0.000201633	0.000427982	0
Bacteria	Unknown KINGDOM	Proteobacteria	Deltaproteobacteria	Myxococcales	Myxococcaceae	0.000760746	0.000863061	0.000314189	0.00034904	9.25797e-05	0.000410434	0.000212826	0.000388142	0.000280771	0.000219744	0.000594389	0.000340086	0.000276192	0.000580009	0	0.000273261	0.000493681	0.000123335	0.000168805	0.00138779	0.000125955	0.000149154	0	0.000445795	0.000616262	0.000246706	0.000193874	0.000647077	0.00021742	0.000205491	0.000267852	0.00047824	0.000180356	0.000348056	0.000315298	5.26732e-05	0.000538068	0.000421252	0.000243516	0.000223878	0.000337154	0.00030245	0.000194537	0.000190876
Bacteria	Unknown KINGDOM	Firmicutes	Bacilli	Bacillales	Paenibacillaceae	0.000427919	0.000460299	0.000377027	0.000581734	0.000370319	0.000501642	0.000354711	0.000291107	0.000315867	0.0019777	0.000237756	0.000437254	0.000736513	0.000515564	0.00111566	0.000546523	0.000394945	0.00049334	0.000168805	0.00026434	0.00016794	0.000261019	0.000114273	0.000202634	0.000115549	0.000296048	0.000193874	0.000152253	0	0.000164393	0.000214282	0.00035868	0.000108213	0.000278445	0.000567537	0	0.000672585	0.000526565	0.000304395	0.00012793	0.000275854	0.000100817	0.000350167	0
Eukaryota	Metazoa	Chordata	Mammalia	Rodentia	Cricetidae	0.000427919	0.000172612	6.28378e-05	0.00034904	0.000462899	0.000136811	0.000248297	9.70356e-05	0.000140385	0.000164808	0.000237756	0.000194335	0.000368256	0.000193336	0.000929714	0.000136631	0.000394945	0.000123335	0.000506415	0.00026434	0.000965656	7.45768e-05	0.000342818	0.000688956	0.000269614	0.000197365	0.000387747	0.000266443	0.000260904	0.000123294	0.000267852	0.0002989	0.000360711	0.000139222	0.000315298	0.000263366	0.000134517	0.00015797	6.08791e-05	0.000447756	0.000122602	5.04083e-05	0.000194537	0
Bacteria	Unknown KINGDOM	Deinococcus-Thermus	Deinococci	Deinococcales	Deinococcaceae	0.000523013	0.00023015	0.000188513	0.000232693	0.000601768	0.000273623	0.000106413	0.000242589	0.000280771	0.000219744	0.000356633	0.000340086	9.20641e-05	0.000257782	0.000185943	0.00109304	0.000197472	0.000123335	0.000168805	6.60851e-05	0.000797716	0.000186442	0.000285682	0.000405268	0.000269614	0.000246706	0.000387747	0.000380633	0.000782711	0.000164393	0.000267852	0.00035868	0.000216427	0.000208834	6.30597e-05	0.000579405	0.000403551	0.00015797	0.000608791	0.000543704	0.000275854	0.000252042	0.00031126	0.000190876
Bacteria	Unknown KINGDOM	Proteobacteria	Gammaproteobacteria	Pseudomonadales	Moraxellaceae	0.000475466	0.000690449	0.000502702	0.000814427	0.000231449	0.000228019	0.000212826	0.000242589	0.000245674	0.000384552	0.000713267	0.000485838	0.000276192	0.000322227	0.000371885	0.000273261	0.000296209	0.000370005	0.000675219	0.00026434	0.000377865	0.000186442	0.000285682	0.000202634	0.000308131	0.000296048	0.000193874	0.00034257	0.000304388	0.000246589	0.000374993	0.0002989	0.000216427	0.000382862	0.000252239	0.000526732	0.000134517	0.000579222	0.000182637	0.000383791	0.000183902	0.000252042	0	0.000763504
Bacteria	Unknown KINGDOM	Chloroflexi	Chloroflexi	Chloroflexales	Chloroflexaceae	0.00028528	0.000632911	0.000502702	0.000930774	0.000231449	0.000456038	0.000532066	0.000339624	0.000561541	0.000439488	0.00118878	0.000631589	0.000552384	0.000515564	0	0.000409892	0.000394945	0.000123335	0.00033761	0.000925192	0.00025191	0.000149154	0.000342818	8.10537e-05	0.000385164	4.93413e-05	0.000646245	0.000266443	0.000347871	8.21963e-05	0.000535705	0.00065758	0.000180356	0.000104417	0.000567537	0.000105346	0.000134517	0.00015797	0.000426154	0.000447756	0.000459756	0.000252042	0.000350167	0
Bacteria	Unknown KINGDOM	Firmicutes	Bacilli	Lactobacillales	Leuconostocaceae	9.50932e-05	0.000575374	0.000188513	0	9.25797e-05	0	0.000141884	0.000194071	0.000140385	0.000219744	0.000237756	0.000291503	0.000276192	0.000322227	0.000557828	0.000409892	0.000691153	0.00049334	0	0.00013217	0.000209925	0.000186442	0.000342818	0.000364742	0.00042368	0.000542754	0.000323123	0.000152253	0.000260904	0.000410981	0.000214282	0.00077714	0.000180356	0.000382862	0.000441418	0.000105346	0	0.000579222	0.000243516	0.000255861	0.000459756	0.000201633	0.000272352	0.000763504
Eukaryota	Viridiplantae	Streptophyta	Unknown CLASS	Solanales	Solanaceae	0.00014264	0.00023015	0.000439864	0	0.000324029	0	0.000390182	0.000291107	0.000210578	0.000164808	0.000237756	4.85838e-05	9.20641e-05	0.000451118	0.000185943	0.000819784	0	0.00098668	0.00033761	0.000396511	0.000713746	0.000111865	0.000228545	0.000202634	0.000115549	0.000246706	0.000516996	0.000418697	0.00021742	0.000246589	0.000374993	0.00023912	0.000180356	0.000208834	0.000315298	0.000210693	0.000269034	0.000526565	0.000182637	0.000351809	0.000245203	0.000403266	0.000700335	0.000954381
Eukaryota	Viridiplantae	Streptophyta	Unknown CLASS	Malvales	Malvaceae	4.75466e-05	0.000287687	0.000879729	0	0.000370319	0.000182415	0.000390182	0.000194071	0	0.000109872	0.000713267	0.000145751	0	0.000128891	0.000371885	0	0	0	0.000168805	0	0.000419851	0	0.000514227	4.05268e-05	0	0	0.000193874	3.80633e-05	4.34839e-05	0.000123294	0.000803557	0	0.000108213	0	0.00126119	0	0	0.000368596	0	6.39652e-05	0	0.00105857	0.00015563	0
Bacteria	Unknown KINGDOM	Proteobacteria	Alphaproteobacteria	Rhodospirillales	Acetobacteraceae	0.00028528	0.00023015	0.000377027	0.000581734	0.000416609	0.000273623	0.000212826	0.000485178	0.000175482	0.000439488	0.000475511	0.000291503	0.000184128	0.000644454	0.000743771	0.000956415	0.000691153	0.00098668	0.00033761	0.000396511	0.000209925	0.000186442	0.000285682	4.05268e-05	0.000385164	4.93413e-05	6.46245e-05	0.000190317	4.34839e-05	0.000369883	0.000267852	0.00035868	0.000144285	0.000104417	0.000252239	5.26732e-05	0.000403551	0.00015797	0.000608791	0.000223878	0.000153252	0.000151225	0.00031126	0.000190876
Archaea	Unknown KINGDOM	Thaumarchaeota	Unknown CLASS	Nitrosopumilales	Nitrosopumilaceae	0.000237733	0.000172612	0.000125676	0.00034904	0.000324029	0.000136811	0.000141884	0.000242589	0.000105289	0.000219744	0.000475511	4.85838e-05	0.000552384	6.44454e-05	0.000371885	0	9.87362e-05	0	0	0.00013217	0.000503821	0.000111865	0.000399954	0.000283688	0.000231098	4.93413e-05	0.000323123	0.000418697	0.00021742	0	0.000107141	0.00053802	0.000216427	0.000139222	0.000630597	0.000474058	0.000538068	0.000315939	0.000608791	0.000255861	0.000153252	0.00030245	7.7815e-05	0.000381752
Eukaryota	Metazoa	Chordata	Mammalia	Unknown ORDER	Suidae	0.00014264	0.00023015	0.000188513	0.000116347	9.25797e-05	4.56038e-05	7.09421e-05	4.85178e-05	3.50963e-05	0.000164808	0	4.85838e-05	0.000368256	6.44454e-05	0	0	0.000197472	0	0	0.000396511	0.000209925	0.000111865	0.000114273	0.000243161	0.000385164	0.000148024	0.00193874	0.000761267	0	0	0.000107141	0.00017934	0	0.000174028	0.000315298	0.000526732	0.000134517	0.000526565	0.000304395	3.19826e-05	0.000214553	0	0.00015563	0
Bacteria	Unknown KINGDOM	Proteobacteria	Gammaproteobacteria	Aeromonadales	Aeromonadaceae	0.00028528	0.000172612	0.000188513	0.000465387	0.000231449	4.56038e-05	0.000177355	9.70356e-05	0.000210578	0.000109872	0.000594389	0.000242919	0.000368256	0.000193336	0.000185943	0	9.87362e-05	0	0.000168805	0.00257732	0.000209925	0.000149154	5.71363e-05	0.000162107	0.000154065	4.93413e-05	6.46245e-05	0.000152253	8.69679e-05	0.000164393	0.000107141	0.00017934	0.000180356	0.00031325	0.000378358	0.000421385	0.000403551	0.000526565	0.000365275	3.19826e-05	0.000122602	0.000252042	0.000194537	0.000381752
Bacteria	Unknown KINGDOM	Proteobacteria	Gammaproteobacteria	Legionellales	Coxiellaceae	0.000427919	0.000287687	0.000188513	0.000232693	0.000416609	0.000273623	0.00031924	0.000242589	0.00038606	0.000109872	0.000475511	0.000242919	9.20641e-05	0.000386673	0	0.000273261	0.000493681	0.000123335	0	0.000594766	0.000419851	0.00022373	0.000114273	0.000202634	7.70327e-05	0.000345389	0.000387747	0.00022838	0.000478323	0.000287687	0.000160711	0.00023912	0.000144285	0.000139222	0.000252239	5.26732e-05	0	0.000368596	0.000243516	0.000511722	0.000429106	0.000100817	0.000194537	0.000572628
Bacteria	Unknown KINGDOM	Proteobacteria	Alphaproteobacteria	Caulobacterales	Caulobacteraceae	0.00028528	0.000287687	0.000188513	0.000814427	0.000370319	0.000136811	0.000283768	0.000194071	0.000210578	0.00027468	0.000237756	0.000194335	9.20641e-05	0.000257782	0.000371885	0.000956415	0.000197472	0.00024667	0.00033761	0.000198255	0.000293895	0.000149154	0.000228545	0.000162107	0.000154065	0.000197365	0.000193874	0.000190317	0.000260904	0.000123294	0.000374993	0.0002989	0.00032464	6.96112e-05	0.000315298	0.000210693	0	0.000210626	0.000365275	0.000191896	3.06504e-05	0.000201633	0.000194537	0.00114526
Eukaryota	Fungi	Ascomycota	Sordariomycetes	Sordariales	Sordariaceae	4.75466e-05	0.000345224	0.000502702	0.00034904	4.62899e-05	0.000136811	0	0.000194071	0.000245674	0.000219744	0	0.000437254	0.000736513	0.000451118	0.000557828	0.000273261	0.000493681	0.00098668	0.000168805	0.000198255	4.19851e-05	0.000335595	0.000342818	0.000121581	0.000231098	0.000197365	0.000323123	0.00011419	0.000434839	0.000164393	0	0.00023912	0.000216427	0.000278445	0.000567537	0.000105346	0.000134517	0.000684535	0.000426154	0.000255861	0.000367805	0	7.7815e-05	0.000190876
Archaea	Unknown KINGDOM	Euryarchaeota	Thermoplasmata	Thermoplasmatales	Thermoplasmataceae	0.000380373	0.000115075	0.000188513	0.000581734	0.000277739	4.56038e-05	0.000283768	9.70356e-05	0.000140385	0	0.000356633	9.71676e-05	9.20641e-05	0.000257782	0.000185943	0	0	0.000123335	0.000506415	0.00013217	0.000377865	0.000186442	5.71363e-05	0.000283688	0.000462196	0	0.000516996	0.000609013	0.000391355	0.000493178	0.000428564	5.978e-05	0.000180356	6.96112e-05	0.000189179	0.000158019	0.000134517	0.000263283	0.000121758	0.000543704	0.000337154	5.04083e-05	0.000116722	0.000572628
Bacteria	Unknown KINGDOM	Firmicutes	Clostridia	Natranaerobiales	Natranaerobiaceae	9.50932e-05	0.000460299	0.000251351	0.00069808	0.00013887	0.000136811	0.000177355	0.000145553	0.000210578	0.000164808	0.000237756	0.000291503	0.000184128	0.000193336	0	0.000136631	0.000296209	0.000123335	0.000168805	0.00013217	0.00016794	0	0.000228545	0.000364742	7.70327e-05	0.000246706	0.000193874	0.00022838	0	0.000164393	0.000267852	0.00035868	0.000108213	0.000104417	0.000189179	0.000210693	0	0.000473909	0.000365275	0	0.000183902	0.000100817	3.89075e-05	0
Viruses	Unknown KINGDOM	Unknown PHYLUM	Unknown CLASS	Caudovirales	Podoviridae	0.00014264	0.000172612	0.000314189	0.000116347	0.00013887	0.000228019	0.000212826	0.000291107	7.01927e-05	0.000219744	0.000118878	4.85838e-05	0.000184128	6.44454e-05	0.000371885	0	9.87362e-05	0.000123335	0.00033761	0.00013217	0.000125955	0.000149154	0.000457091	8.10537e-05	0.000346647	0.000148024	0.000193874	0.000152253	0.000260904	8.21963e-05	0.000160711	0.0002989	0.000180356	0.000104417	0.000567537	0.000210693	0.000134517	0.00015797	0.000182637	0.000191896	0.000275854	0.000252042	0.000116722	0
Bacteria	Unknown KINGDOM	Actinobacteria	Actinobacteria	Actinomycetales	Micrococcaceae	0.000237733	0.000402762	0.000251351	0.00069808	0.000462899	0.000501642	0.000354711	0.000194071	0.000210578	0.000219744	0	0.000145751	0.000736513	0.000193336	0.000743771	0	0.000394945	0.000370005	0.000506415	6.60851e-05	0.00025191	0.000261019	5.71363e-05	0.000121581	0.000269614	0	0.000193874	0.000190317	0.000173936	0.000123294	0.000374993	0.00017934	0.000216427	3.48056e-05	0.000189179	0.000158019	0.000134517	5.26565e-05	0.000304395	0.000383791	0.000275854	0.000151225	0.000194537	0.000572628
Bacteria	Unknown KINGDOM	Proteobacteria	Deltaproteobacteria	Desulfuromonadales	Pelobacteraceae	0	0.000287687	6.28378e-05	0.00034904	9.25797e-05	0.000182415	0.000141884	0.000145553	7.01927e-05	0.000109872	0.000237756	0.000145751	0.000368256	0.000257782	0	0.000136631	0.000394945	0.000123335	0.00033761	0.000330426	4.19851e-05	0.000149154	0.000399954	4.05268e-05	0.000308131	0.000246706	0.000323123	7.61267e-05	0	0.000123294	0	0.0002989	0.000108213	0.000243639	0.000567537	0.000158019	0.000134517	0.000421252	6.08791e-05	0.000415774	0	0.00030245	0.000116722	0
Archaea	Unknown KINGDOM	Crenarchaeota	Thermoprotei	Sulfolobales	Sulfolobaceae	0.000237733	0.000115075	6.28378e-05	0.000232693	0.000416609	0.000136811	0.000283768	0.000194071	0.000280771	0.000164808	0	0.000145751	9.20641e-05	0.000193336	0	0.000546523	0	0	0.00033761	6.60851e-05	0.000377865	0.000186442	0	0.000364742	0.000154065	0.00039473	0.000193874	0.000304507	0.000260904	0.000123294	0.000160711	0.00011956	0.000144285	0.000278445	0.000126119	0.000105346	0.000269034	0.000210626	0.000243516	0.00012793	0.000122602	0.000100817	0.00031126	0.000381752
Eukaryota	Fungi	Ascomycota	Saccharomycetes	Saccharomycetales	Dipodascaceae	4.75466e-05	5.75374e-05	0.000251351	0	0	0.000182415	7.09421e-05	0.000145553	0	0.000384552	0.000951022	9.71676e-05	0	0	0.000371885	0.000136631	0.000296209	0	0.000168805	0	4.19851e-05	0.000671191	0.000285682	0.000202634	0.000192582	0.000246706	6.46245e-05	3.80633e-05	0	4.10981e-05	0.000214282	0.00011956	0.000144285	0.000626501	0.000126119	0.000210693	0.00121065	0.000579222	0	0	0.00147122	0	0.00101159	0.000190876
Eukaryota	Unknown KINGDOM	Unknown PHYLUM	Unknown CLASS	Unknown ORDER	Histionidae	0	0.000517837	0.000628378	0.000232693	0	0.000319227	7.09421e-05	0.000194071	0.000140385	0.000164808	0.000118878	0.000242919	0.000184128	6.44454e-05	0	0.000136631	0.000197472	0.000123335	0.000168805	0	4.19851e-05	0.000447461	0.000457091	0.000162107	0.000269614	0.000592096	0.000387747	0.000304507	0.000565291	0	0	5.978e-05	0.000108213	0.000243639	0.000126119	0.000210693	0	0.00015797	6.08791e-05	0.000447756	0.000490406	0.000100817	0.000116722	0
Bacteria	Unknown KINGDOM	Firmicutes	Clostridia	Clostridiales	Ruminococcaceae	0.00028528	0.000287687	0.000188513	0.000814427	0.000324029	0.000136811	0.000177355	0.000145553	3.50963e-05	0	0.000237756	0.000242919	0.00110477	0.0007089	0.000185943	0	0.000296209	0	0.000168805	0.00013217	0	0.000111865	5.71363e-05	4.05268e-05	0.000346647	0.000296048	0.000387747	0.000152253	0.00021742	0.000205491	0.000214282	0.00035868	0	3.48056e-05	0.000252239	0.000316039	0.000269034	0.000315939	0.000304395	0.000223878	0	0.00030245	0	0.00114526
Bacteria	Unknown KINGDOM	Firmicutes	Clostridia	Clostridiales	Clostridiales Family XVIII. Incertae Sedis	0	0.000287687	6.28378e-05	0.000465387	0.00013887	0.000228019	0.000212826	9.70356e-05	0.000280771	0	0	0.000291503	0	6.44454e-05	0.000185943	0.000136631	0.000296209	0	0.000168805	6.60851e-05	0.00016794	0.000149154	0.000399954	8.10537e-05	0.000808843	9.86826e-05	0.000387747	7.61267e-05	0	0	0.000321423	0.00023912	3.60711e-05	0.000243639	0.000189179	0	0	0.000210626	6.08791e-05	0.000287843	0.000214553	0.000201633	0.00015563	0
Eukaryota	Metazoa	Nematoda	Chromadorea	Ascaridida	Ascarididae	0.00028528	0.000115075	0	0.00104712	0.000231449	4.56038e-05	0.000212826	0.000145553	0	0.000109872	0	0.000145751	0.00101271	0.0007089	0.000185943	0	0.000197472	0	0	6.60851e-05	0	3.72884e-05	5.71363e-05	4.05268e-05	0.000346647	0	0.000581621	0.000190317	0.00021742	0.000205491	0.000214282	0.0002989	0.000180356	3.48056e-05	0.000315298	0.000421385	0.000134517	0.000473909	0.000304395	0.000223878	0	0.000151225	0	0.000381752
Archaea	Unknown KINGDOM	Crenarchaeota	Thermoprotei	Desulfurococcales	Desulfurococcaceae	0	0.000287687	0.000377027	0	9.25797e-05	9.12076e-05	0.000177355	4.85178e-05	0.000175482	0.000109872	0.000118878	0.00038867	0.000184128	0.000257782	0	0	9.87362e-05	0.000123335	0	0.000396511	0.000293895	7.45768e-05	0	8.10537e-05	0.000115549	9.86826e-05	0.000516996	0.000304507	0.000130452	0	0.000321423	0.00023912	3.60711e-05	0.000104417	0.000378358	0.000263366	0	0.000105313	0.000304395	0	3.06504e-05	0.000201633	0.000116722	0.000763504
Archaea	Unknown KINGDOM	Euryarchaeota	Methanopyri	Methanopyrales	Methanopyraceae	0.000190186	0.000345224	0.000439864	0.000116347	0.000277739	0.000228019	0.00031924	9.70356e-05	0.000350963	5.4936e-05	0.000356633	0.000145751	0.000276192	0.000580009	0.000371885	0	0	0.000123335	0	0.00013217	8.39701e-05	3.72884e-05	0.000228545	0	0	0.000197365	0.000129249	0.000304507	8.69679e-05	0	0.000267852	0.00053802	7.21423e-05	0.000139222	0.000756716	0.000790097	0	5.26565e-05	0.000182637	0	0.000183902	5.04083e-05	0	0
Bacteria	Unknown KINGDOM	Proteobacteria	Alphaproteobacteria	Rhizobiales	Bartonellaceae	9.50932e-05	0.000115075	0	0.00034904	0.00013887	4.56038e-05	0.000106413	0	0.000210578	0.000164808	0.000475511	4.85838e-05	9.20641e-05	0.000451118	0.000185943	0.000273261	0.000197472	0.000123335	0.000506415	0.000330426	0.000125955	3.72884e-05	0.000114273	0.000162107	3.85164e-05	0.000345389	0.000387747	0.00011419	8.69679e-05	0.000246589	5.35705e-05	5.978e-05	7.21423e-05	0.000243639	0.000252239	5.26732e-05	0.000269034	0.000315939	0	9.59478e-05	0.000122602	0.000201633	0.00015563	0
Viruses	Unknown KINGDOM	Unknown PHYLUM	Unknown CLASS	Unknown ORDER	Virgaviridae	9.50932e-05	5.75374e-05	0	0.000116347	0.000416609	9.12076e-05	0.000106413	0.000145553	0	5.4936e-05	0	0	0.000184128	0	0.000185943	0	0	0.00049334	0.000168805	0	0.000125955	0.000186442	0	0.000121581	0.000115549	0.00340455	0.000775494	0.00125609	0.000130452	0.000123294	0	5.978e-05	0.000144285	0	0.000126119	5.26732e-05	0	0.000105313	6.08791e-05	0	0.000337154	5.04083e-05	0.000194537	0
Bacteria	Unknown KINGDOM	Actinobacteria	Actinobacteria	Actinomycetales	Frankiaceae	0.00014264	0.000115075	0.000251351	0.000581734	0.000231449	0.000228019	7.09421e-05	0.000194071	7.01927e-05	0.000109872	0.000237756	0.000145751	0.00046032	0.000193336	0.000185943	0.000136631	9.87362e-05	0.000123335	0	6.60851e-05	0	0.000149154	0.000399954	8.10537e-05	0	9.86826e-05	0	0.000152253	4.34839e-05	0.000205491	0	0.00035868	7.21423e-05	0.000139222	0.000252239	5.26732e-05	0.000134517	0.000315939	0.000365275	0.000159913	0.000153252	5.04083e-05	0.00015563	0.000190876
Bacteria	Unknown KINGDOM	Proteobacteria	Gammaproteobacteria	Chromatiales	Chromatiaceae	0.000237733	5.75374e-05	6.28378e-05	0.000581734	0.000185159	0.000182415	7.09421e-05	9.70356e-05	0.000175482	0.00027468	0.000356633	0	0	0.000193336	0	0.000136631	0	0.000123335	0.000168805	0.000198255	4.19851e-05	7.45768e-05	0.000171409	0	0.000231098	0	6.46245e-05	7.61267e-05	0.000130452	0	0.000107141	0.00047824	0.000108213	0.000104417	0.000378358	0.000579405	0.000269034	0.000526565	0	0.000159913	3.06504e-05	0	3.89075e-05	0.000572628
Bacteria	Unknown KINGDOM	Proteobacteria	Alphaproteobacteria	Rhizobiales	Phyllobacteriaceae	0.000190186	0.000402762	0.000188513	0.000116347	0.000277739	0.000136811	0.00031924	0.000194071	7.01927e-05	0.000164808	0.000475511	9.71676e-05	9.20641e-05	0.000515564	0.000185943	0.000273261	9.87362e-05	0.00024667	0	6.60851e-05	0.000545806	7.45768e-05	0.000171409	0.000283688	7.70327e-05	9.86826e-05	6.46245e-05	3.80633e-05	0.000434839	8.21963e-05	5.35705e-05	0.0002989	0.000108213	0.000104417	0.000189179	0.000210693	0.000134517	5.26565e-05	0.000182637	0.000287843	6.13008e-05	0.000201633	3.89075e-05	0.000190876
Viruses	Unknown KINGDOM	Unknown PHYLUM	Unknown CLASS	Unknown ORDER	Poxviridae	9.50932e-05	0.000115075	0.000251351	0.00034904	0.000601768	0.000182415	0.000106413	0	0.000105289	0.00115366	0.000356633	0.000242919	0.000276192	0.000322227	0	0.000409892	0	0.00024667	0	0	0.000293895	3.72884e-05	0.000342818	0.000162107	7.70327e-05	9.86826e-05	0.000258498	7.61267e-05	8.69679e-05	8.21963e-05	0.000535705	0.00017934	0.000216427	3.48056e-05	0.000189179	0.000158019	0	0.000368596	0	0.000159913	0	0.000100817	3.89075e-05	0
Eukaryota	Metazoa	Chordata	Mammalia	Lagomorpha	Leporidae	0.000190186	0.00023015	0	0	9.25797e-05	9.12076e-05	0.000177355	9.70356e-05	0.000175482	0.000164808	0	0	0.000184128	0	0	0	0	0	0	0.000396511	0.000125955	3.72884e-05	0	0.000243161	0.000154065	4.93413e-05	0.000387747	3.80633e-05	0	8.21963e-05	0.000321423	0	0.000144285	0.000139222	0.000126119	0	0.000672585	0.00105313	0.000121758	3.19826e-05	6.13008e-05	0	3.89075e-05	0
Eukaryota	Unknown KINGDOM	Unknown PHYLUM	Bangiophyceae	Cyanidiales	Cyanidiaceae	0.000190186	0	0	0.00069808	0.000185159	4.56038e-05	0	9.70356e-05	0	0.000164808	0.000356633	4.85838e-05	9.20641e-05	6.44454e-05	0	0	9.87362e-05	0	0	0.00026434	0.000209925	0	0.000399954	0.000121581	0.000115549	4.93413e-05	0.000193874	0.000266443	0.000130452	0	0.000374993	0.0002989	0.000108213	0	0.000315298	0.000526732	0	0.000210626	0	0.00012793	0	0	0	0.000763504
Bacteria	Unknown KINGDOM	Elusimicrobia	Elusimicrobia	Elusimicrobiales	Elusimicrobiaceae	0	0.000172612	0.000377027	0.00034904	0	0	7.09421e-05	0	7.01927e-05	0	0	4.85838e-05	9.20641e-05	0	0	0	0	0	0	0.00026434	0	0	0	0.000202634	0	0.000197365	0.000193874	0.000190317	0	0.000205491	0.000160711	0.00041846	3.60711e-05	0	0	0.000158019	0	0.000789848	6.08791e-05	0	0.000153252	0.000100817	7.7815e-05	0
Eukaryota	Metazoa	Arthropoda	Insecta	Hymenoptera	Pteromalidae	0	0	0	0.000465387	0	0	0	4.85178e-05	0	0.000164808	0.000237756	0	0.000184128	0	0.000185943	0	0	0	0	0	0.000209925	0	0.000114273	0.000283688	0	0	0.000193874	0.000266443	0	0	0.000267852	0.0002989	7.21423e-05	0	0.000630597	0.000158019	0	0.00152704	0	0	0	0.000151225	3.89075e-05	0.000190876
Bacteria	Unknown KINGDOM	Bacteroidetes	Bacteroidia	Bacteroidales	Prevotellaceae	4.75466e-05	0.000172612	0.000125676	0.00034904	0	4.56038e-05	3.54711e-05	9.70356e-05	0.000140385	0	0.000118878	0	9.20641e-05	0	0	0.000136631	0	0.000123335	0	0.000198255	0.000125955	0.000186442	0.000114273	8.10537e-05	7.70327e-05	0.000197365	0.000258498	0.000723203	0	0	5.35705e-05	0.00011956	0.000108213	0.000174028	6.30597e-05	0	0.000134517	0.000473909	0.000182637	9.59478e-05	3.06504e-05	0.000151225	0.000194537	0.000381752
Bacteria	Unknown KINGDOM	Tenericutes	Mollicutes	Acholeplasmatales	Acholeplasmataceae	9.50932e-05	0.000287687	0.000188513	0	9.25797e-05	4.56038e-05	0.000425653	0.000533696	0.000526445	0.000164808	0.000118878	0	0	0.000257782	0.000743771	0	0	0	0.000168805	0.000396511	4.19851e-05	0.000111865	0	0	7.70327e-05	4.93413e-05	0	0.000418697	0.000130452	8.21963e-05	0	5.978e-05	3.60711e-05	0.000278445	0	0	0.000269034	0	0	0.00012793	6.13008e-05	0	0.00015563	0.000190876
Bacteria	Unknown KINGDOM	Actinobacteria	Actinobacteria	Actinomycetales	Nocardiaceae	9.50932e-05	0.00023015	6.28378e-05	0.000581734	4.62899e-05	0	0.000141884	4.85178e-05	0.000175482	0.000384552	0.000475511	0.000291503	0.000552384	0.000322227	0.000185943	0.000273261	0.000394945	0.000123335	0	6.60851e-05	4.19851e-05	7.45768e-05	0.000171409	4.05268e-05	0	9.86826e-05	6.46245e-05	0.00011419	8.69679e-05	4.10981e-05	5.35705e-05	0.0002989	0	0.000139222	0.000189179	0.000158019	0	0.000315939	6.08791e-05	0.00012793	0.000122602	0	0.00015563	0.000381752
Bacteria	Unknown KINGDOM	Spirochaetes	Spirochaetia	Spirochaetales	Leptospiraceae	0	0.000402762	0.000314189	0.000116347	4.62899e-05	9.12076e-05	7.09421e-05	4.85178e-05	0.000210578	0.000219744	0	0.000242919	0	0.000257782	0.000371885	0.000273261	0.000789889	0.000123335	0.000168805	6.60851e-05	8.39701e-05	0	0.000114273	0.000162107	7.70327e-05	0.000246706	0.000193874	3.80633e-05	0	0	0	0.00023912	3.60711e-05	6.96112e-05	0.000189179	5.26732e-05	0	0.000315939	6.08791e-05	3.19826e-05	0.000122602	0.000100817	7.7815e-05	0
Eukaryota	Fungi	Microsporidia	Unknown CLASS	Unknown ORDER	Unikaryonidae	0.00028528	0.000115075	0.000125676	0.000232693	0.00013887	0.000319227	7.09421e-05	9.70356e-05	0.000105289	5.4936e-05	0.000237756	0.000145751	0	0.000128891	0	0.000273261	0.000197472	0	0.000168805	0.000330426	0	3.72884e-05	0.000171409	8.10537e-05	3.85164e-05	9.86826e-05	0.000258498	0	0	0.000164393	5.35705e-05	0.0002989	0.000108213	6.96112e-05	0.000189179	0.000210693	0	0.000210626	6.08791e-05	6.39652e-05	6.13008e-05	0.000100817	3.89075e-05	0.000763504
Viruses	Unknown KINGDOM	Unknown PHYLUM	Unknown CLASS	Unknown ORDER	Mimiviridae	0.00014264	0.000287687	6.28378e-05	0	0.000185159	4.56038e-05	0.000141884	4.85178e-05	0.000105289	0.000164808	0.000356633	0.000340086	0	0.000128891	0	0.000409892	0	0.000123335	0.000168805	6.60851e-05	0.000125955	0.000111865	0.000114273	8.10537e-05	7.70327e-05	0.000197365	6.46245e-05	0.000152253	0.000130452	0	0.000374993	0.00017934	0.000108213	0.000104417	0.000126119	0	0	5.26565e-05	0.000121758	6.39652e-05	0.000122602	0	0.000194537	0
Bacteria	Unknown KINGDOM	Proteobacteria	Deltaproteobacteria	Desulfobacterales	Desulfobacteraceae	9.50932e-05	0.000345224	6.28378e-05	0.000465387	0.000231449	9.12076e-05	0.000106413	9.70356e-05	0.000140385	5.4936e-05	0	9.71676e-05	0.000368256	0	0	0	0.000197472	0	0	6.60851e-05	0.000209925	0	5.71363e-05	0.000283688	7.70327e-05	9.86826e-05	0.000193874	3.80633e-05	8.69679e-05	0.000205491	0.000107141	5.978e-05	0.000108213	0.000208834	0.000378358	0	0.000134517	0.000210626	0.000304395	0.000159913	0.000153252	5.04083e-05	3.89075e-05	0.000190876
Eukaryota	Fungi	Ascomycota	Sordariomycetes	Magnaporthales	Magnaporthaceae	0.000190186	5.75374e-05	0	0.00034904	0.000324029	0	3.54711e-05	0	0	5.4936e-05	0.000356633	0.000291503	0	0.000128891	0	0	0	0	0.000168805	0.00013217	0.00025191	7.45768e-05	0.000228545	4.05268e-05	0	9.86826e-05	0.000258498	7.61267e-05	0.000695743	0.000205491	0.000214282	0.00023912	0.000180356	3.48056e-05	0.000126119	0.000105346	0.000134517	0.00015797	0.000121758	0	6.13008e-05	0.000352858	0.000272352	0.000763504
Bacteria	Unknown KINGDOM	Firmicutes	Clostridia	Clostridiales	Clostridiales Family XI. Incertae Sedis	0.000190186	0.000747986	0.000188513	0	0.000231449	0.000501642	0.00031924	0.000630731	0.000315867	0.000439488	0.000475511	0.00038867	9.20641e-05	0.000451118	0	0.000136631	9.87362e-05	0	0	6.60851e-05	0	7.45768e-05	0	4.05268e-05	0.000115549	9.86826e-05	0	3.80633e-05	4.34839e-05	0	0.000321423	0	0.000180356	0.000382862	0	0	0	5.26565e-05	0.000243516	0.000319826	3.06504e-05	0.000201633	7.7815e-05	0
Bacteria	Unknown KINGDOM	Proteobacteria	Gammaproteobacteria	Chromatiales	Ectothiorhodospiraceae	4.75466e-05	5.75374e-05	0.000251351	0.000232693	0	4.56038e-05	3.54711e-05	0	7.01927e-05	0	0	9.71676e-05	9.20641e-05	6.44454e-05	0	0	9.87362e-05	0	0	0.00026434	4.19851e-05	7.45768e-05	0.000171409	0.000121581	0	0.000148024	6.46245e-05	0.000304507	4.34839e-05	0.000123294	5.35705e-05	0.00011956	0.000108213	6.96112e-05	0.000126119	0	0.000269034	0.000473909	0.000182637	0	0.000214553	5.04083e-05	0.00015563	0.000190876
Bacteria	Unknown KINGDOM	Proteobacteria	Gammaproteobacteria	Methylococcales	Methylococcaceae	0.00014264	0.000172612	0	0.00034904	0.000231449	9.12076e-05	0.000177355	0	0.000105289	0	0	0.000194335	0	0.000128891	0	0.000136631	0	0	0.000168805	6.60851e-05	0.000377865	3.72884e-05	0.000228545	0	0.000154065	0	0.000129249	0.000152253	8.69679e-05	4.10981e-05	0.000321423	0.00035868	0.000108213	0	0.000126119	5.26732e-05	0	0.000105313	0.000304395	6.39652e-05	9.19512e-05	0.000151225	0.00015563	0.000381752
Bacteria	Unknown KINGDOM	Proteobacteria	Gammaproteobacteria	Legionellales	Legionellaceae	4.75466e-05	0.000287687	6.28378e-05	0.000116347	4.62899e-05	9.12076e-05	0.000141884	0.000242589	0.000140385	0	0.000118878	9.71676e-05	9.20641e-05	0.000128891	0.000185943	0.000546523	9.87362e-05	0	0	0.000396511	0	0.000186442	0.000171409	4.05268e-05	0.000115549	9.86826e-05	0	0	0.00021742	0	0.000107141	0	0.000252498	0.000104417	6.30597e-05	0.000158019	0	0.000263283	6.08791e-05	0	9.19512e-05	0.000252042	3.89075e-05	0.000381752
Viruses	Unknown KINGDOM	Unknown PHYLUM	Unknown CLASS	Herpesvirales	Herpesviridae	0.00014264	0.000402762	0	0.000232693	0.00013887	4.56038e-05	7.09421e-05	0	0.000105289	0.000219744	0.000118878	4.85838e-05	0	0.000128891	0	0	9.87362e-05	0.000123335	0.000168805	6.60851e-05	0.00025191	0	5.71363e-05	8.10537e-05	0.000654778	9.86826e-05	0.000193874	0	8.69679e-05	4.10981e-05	0	0.00017934	0	6.96112e-05	0.000126119	0.000105346	0.000134517	5.26565e-05	0	0	0.000153252	0	0.00015563	0
Eukaryota	Viridiplantae	Streptophyta	Unknown CLASS	Rosales	Rosaceae	9.50932e-05	0	0.000377027	0	0.00240707	0	0	0	0	0	0	0	0	0	0	0	0	0	0.000168805	0	4.19851e-05	0	0.000114273	4.05268e-05	0.000962909	0	0	0	0	0.000205491	0	0	7.21423e-05	0.000208834	0	5.26732e-05	0	0	0.000487033	0.000767582	3.06504e-05	0	0	0
Bacteria	Unknown KINGDOM	Proteobacteria	Gammaproteobacteria	Acidithiobacillales	Acidithiobacillaceae	9.50932e-05	0.00023015	0.000125676	0.000232693	9.25797e-05	0.000182415	0	4.85178e-05	7.01927e-05	0.00054936	0.000118878	0.00038867	0.000184128	0.000322227	0	0	0	0	0	6.60851e-05	4.19851e-05	0	0.000342818	0	7.70327e-05	0	0.000129249	7.61267e-05	0	4.10981e-05	0.000107141	0.00011956	0	0.000139222	0.000252239	0	0	0.00015797	6.08791e-05	6.39652e-05	0	5.04083e-05	7.7815e-05	0.000190876
Bacteria	Unknown KINGDOM	Actinobacteria	Actinobacteria	Actinomycetales	Microbacteriaceae	0.000427919	0	0.000314189	0.000232693	0.00013887	0.000182415	3.54711e-05	0.000145553	0	0.00027468	0.000237756	0.000291503	0.00046032	0.000257782	0	0	0.000296209	0.000123335	0	0.000528681	0	7.45768e-05	5.71363e-05	0	0	0	6.46245e-05	3.80633e-05	0	0	0.000107141	0.0002989	7.21423e-05	0	0.000189179	0	0	0.00015797	0	6.39652e-05	6.13008e-05	0.000100817	0	0.000381752
Bacteria	Unknown KINGDOM	Proteobacteria	Gammaproteobacteria	Thiotrichales	Piscirickettsiaceae	0	0.00023015	0	0.000116347	4.62899e-05	0	0	0.000145553	7.01927e-05	0.00027468	0	4.85838e-05	9.20641e-05	0.000128891	0.000185943	0	0.000197472	0.000123335	0.000506415	0.000462596	4.19851e-05	7.45768e-05	0	8.10537e-05	3.85164e-05	0.000148024	0	3.80633e-05	0.000130452	4.10981e-05	0.000214282	0.00023912	3.60711e-05	6.96112e-05	0.000126119	5.26732e-05	0.000134517	5.26565e-05	0	0.000191896	0.000122602	0.000151225	0.000116722	0.000572628
Bacteria	Unknown KINGDOM	Firmicutes	Clostridia	Clostridiales	Heliobacteriaceae	9.50932e-05	0.00023015	0	0.000232693	0.000231449	0.000228019	0.000141884	9.70356e-05	7.01927e-05	5.4936e-05	0	9.71676e-05	0.000276192	0.000386673	0	0	0.000197472	0.000370005	0.000168805	6.60851e-05	0.000125955	7.45768e-05	0.000114273	4.05268e-05	7.70327e-05	9.86826e-05	0	0.000190317	0.000130452	4.10981e-05	0	0.00023912	0.000216427	6.96112e-05	0.000189179	5.26732e-05	0.000134517	0.000105313	0	9.59478e-05	3.06504e-05	5.04083e-05	0.000116722	0.000572628
Archaea	Unknown KINGDOM	Euryarchaeota	Methanococci	Methanococcales	Methanococcaceae	0.000332826	0	0.000125676	0.000116347	9.25797e-05	0	3.54711e-05	9.70356e-05	0.000175482	0	0	0.000145751	0	0.000128891	0	0	9.87362e-05	0	0	0.00013217	8.39701e-05	0	0.000114273	0	0.000231098	0.000148024	0.000129249	0.00022838	4.34839e-05	8.21963e-05	0.000160711	0	0.000252498	0.000104417	0.000126119	0	0.000134517	0	0.000608791	0.000287843	3.06504e-05	0.000100817	0.00015563	0.000381752
Eukaryota	Fungi	Ascomycota	Sordariomycetes	Hypocreales	Nectriaceae	0	0.000115075	0.000251351	0	0	0.000228019	0	0.000388142	0.000280771	0.00027468	0	0.000194335	0.000276192	0.000128891	0.000185943	0	9.87362e-05	0	0.000168805	0.000330426	8.39701e-05	0	0.000228545	4.05268e-05	0	0.000148024	6.46245e-05	0	4.34839e-05	8.21963e-05	0	0	3.60711e-05	3.48056e-05	0	0	0.000134517	0.000105313	0	0	3.06504e-05	0	0	0.000572628
Bacteria	Unknown KINGDOM	Actinobacteria	Actinobacteria	Actinomycetales	Nocardiopsaceae	4.75466e-05	0.000172612	0	0.000465387	4.62899e-05	9.12076e-05	0.000106413	4.85178e-05	0	0.000164808	0.000475511	0.000145751	0.000184128	0.000322227	0	0.000136631	0.000394945	0.000123335	0.00033761	6.60851e-05	0	0.000149154	0.000171409	0	0	0.000296048	6.46245e-05	0	0	0	0	0.00011956	3.60711e-05	3.48056e-05	0.000252239	0.000105346	0.000269034	0	0	0	3.06504e-05	5.04083e-05	0.000116722	0.000572628
Bacteria	Unknown KINGDOM	Proteobacteria	Gammaproteobacteria	Oceanospirillales	Halomonadaceae	9.50932e-05	0.000172612	6.28378e-05	0	4.62899e-05	4.56038e-05	0.000212826	0	0	0.000219744	0.000832145	0.000145751	9.20641e-05	0.000128891	0	0.000409892	0	0	0	0.00013217	0	0.00022373	0.000171409	0.000121581	0	0	6.46245e-05	3.80633e-05	0	0	0.000214282	0	0	0	0.000189179	0.000316039	0.000807103	0.000315939	0	0.00012793	9.19512e-05	0.000201633	3.89075e-05	0.000572628
Eukaryota	Metazoa	Arthropoda	Insecta	Diptera	Culicidae	0.000332826	5.75374e-05	0.000125676	0.00034904	0.000462899	9.12076e-05	7.09421e-05	0	0	5.4936e-05	0	9.71676e-05	0	0	0.000371885	0	0	0.000123335	0	6.60851e-05	0.000629776	3.72884e-05	5.71363e-05	0	0.000231098	9.86826e-05	6.46245e-05	3.80633e-05	0.000478323	0	5.35705e-05	0.00035868	3.60711e-05	0.000139222	0.000126119	0.000105346	0	0.000263283	0.000243516	0.000287843	0	0.000201633	7.7815e-05	0.000381752
Eukaryota	Fungi	Basidiomycota	Ustilaginomycetes	Ustilaginales	Ustilaginaceae	9.50932e-05	0.00023015	0	0.00034904	0.000231449	9.12076e-05	0.000212826	0.000145553	7.01927e-05	0.00027468	0.000594389	0	9.20641e-05	0.000128891	0	0	0.000197472	0.000123335	0	0	0.000209925	0.000149154	0	8.10537e-05	0.000115549	4.93413e-05	0.000193874	0.00011419	0.000130452	0	0.000107141	0	0.000108213	0	0	0.000158019	0	0.00015797	0	0	0	0.000151225	0.000116722	0
Bacteria	Unknown KINGDOM	Proteobacteria	Deltaproteobacteria	Desulfobacterales	Desulfobulbaceae	0	0.000402762	0.000188513	0	4.62899e-05	0.000136811	0.000177355	0.000242589	0.000140385	0.000219744	0.000118878	0.000242919	9.20641e-05	6.44454e-05	0	0.000409892	0.000394945	0.000370005	0.000506415	0	0	7.45768e-05	0	8.10537e-05	7.70327e-05	0.000345389	0	3.80633e-05	0	0	0	0.00011956	0	0.000139222	0	0	0.000269034	5.26565e-05	0.000182637	0	0.000122602	0.000100817	0.00015563	0
Bacteria	Unknown KINGDOM	Actinobacteria	Actinobacteria	Actinomycetales	Micromonosporaceae	0	0.00023015	0	0.000814427	0	0	0.000106413	4.85178e-05	0	0.000109872	0.000475511	0.00038867	0.000644449	0.000322227	0	0	0.000394945	0.00024667	0.000168805	0.00013217	0	3.72884e-05	0.000171409	8.10537e-05	0	0	6.46245e-05	0	0	0	0	0.0002989	3.60711e-05	6.96112e-05	0.000315298	0.000158019	0.000134517	0.00015797	0	0	3.06504e-05	5.04083e-05	0	0
Bacteria	Unknown KINGDOM	Proteobacteria	Betaproteobacteria	Hydrogenophilales	Hydrogenophilaceae	0	0.00023015	6.28378e-05	0.000116347	0	0	0	4.85178e-05	0.000105289	0.000109872	0.000118878	0.000145751	0.000184128	0.000322227	0.000185943	0	9.87362e-05	0	0	0.000396511	0	0	0.000171409	0	0	0.000246706	0.000452372	0.000152253	8.69679e-05	0	0	0	0	3.48056e-05	0.000315298	5.26732e-05	0	0.00015797	0.000121758	0	3.06504e-05	0	3.89075e-05	0.000190876
Eukaryota	Viridiplantae	Streptophyta	Unknown CLASS	Caryophyllales	Phytolaccaceae	4.75466e-05	5.75374e-05	0.000251351	0.00034904	4.62899e-05	0.000136811	0.000141884	9.70356e-05	7.01927e-05	0	0.000237756	0	0	6.44454e-05	0.000185943	0.000409892	9.87362e-05	0.000123335	0.000168805	0	0	0	0.000114273	0.000121581	7.70327e-05	4.93413e-05	6.46245e-05	3.80633e-05	0.000130452	4.10981e-05	5.35705e-05	5.978e-05	0.000108213	3.48056e-05	6.30597e-05	0	0.000134517	0	0.000182637	0.00012793	6.13008e-05	0	3.89075e-05	0.000190876
Eukaryota	Metazoa	Platyhelminthes	Cestoda	Cyclophyllidea	Hymenolepididae	9.50932e-05	0.000172612	6.28378e-05	0.000814427	0.00013887	9.12076e-05	0.000177355	4.85178e-05	7.01927e-05	0.00027468	0.000356633	0	9.20641e-05	0.000128891	0	0	9.87362e-05	0	0	0.000198255	8.39701e-05	0	0.000114273	0	0.000154065	9.86826e-05	0	3.80633e-05	0.000130452	0	0.000160711	0.0002989	0.000108213	0	0.000189179	0.000210693	0	0.00015797	0	0.00012793	0	0	3.89075e-05	0.000190876
Viruses	Unknown KINGDOM	Unknown PHYLUM	Unknown CLASS	Unknown ORDER	Arenaviridae	0.000332826	0.00023015	0.000251351	0	0.000416609	0.000228019	0.000106413	0.000242589	0.000105289	0.000219744	0.000237756	0.000194335	0	0.000322227	0	0	9.87362e-05	0	0	0	0.000209925	0	0	0	0	4.93413e-05	0	3.80633e-05	0.00021742	0	0	0	0.000180356	6.96112e-05	6.30597e-05	0.000210693	0.000134517	5.26565e-05	0.000182637	9.59478e-05	6.13008e-05	0.000201633	7.7815e-05	0
Archaea	Unknown KINGDOM	Crenarchaeota	Thermoprotei	Thermoproteales	Thermoproteaceae	9.50932e-05	0.00023015	0.000125676	0	0.00013887	0.000228019	0.000212826	0.000145553	7.01927e-05	0.000109872	0	0	0	0	0	0	0	0.000370005	0	0.00013217	0.00025191	0.000335595	5.71363e-05	8.10537e-05	3.85164e-05	0	0.000129249	0.00022838	0.000173936	8.21963e-05	0.000214282	0.00011956	0.000108213	3.48056e-05	0.000126119	5.26732e-05	0.000134517	0	6.08791e-05	6.39652e-05	9.19512e-05	0.000151225	0.00015563	0
Eukaryota	Metazoa	Chordata	Mammalia	Primates	Cercopithecidae	0.000237733	0.000402762	0.000125676	0	0.000277739	4.56038e-05	0.000212826	9.70356e-05	3.50963e-05	0.000219744	0.000118878	0.000145751	9.20641e-05	6.44454e-05	0	0	0	0	0	0.000198255	4.19851e-05	0	5.71363e-05	0	7.70327e-05	0.000148024	0	7.61267e-05	8.69679e-05	4.10981e-05	0.000267852	0	0.000144285	0.000139222	6.30597e-05	0	0.000269034	0	0.000121758	3.19826e-05	6.13008e-05	0.000201633	0.000233445	0
Bacteria	Unknown KINGDOM	Proteobacteria	Betaproteobacteria	Nitrosomonadales	Nitrosomonadaceae	0	5.75374e-05	6.28378e-05	0	0	0	0	4.85178e-05	0	5.4936e-05	0	0	0	6.44454e-05	0	0	9.87362e-05	0	0	0	0.000125955	7.45768e-05	0	0.000283688	3.85164e-05	0	6.46245e-05	7.61267e-05	0.000130452	0	0.000214282	0	0.000432854	0	0.000126119	0	0.000134517	0.000210626	6.08791e-05	3.19826e-05	0	0	0.000116722	0.000190876
Bacteria	Unknown KINGDOM	Proteobacteria	Alphaproteobacteria	Rhizobiales	Xanthobacteraceae	0.000237733	0.000172612	0	0	0.00013887	0	3.54711e-05	0	0.000245674	0.000109872	0	0.000145751	0	0.000193336	0	0	0	0	0	0.00026434	0	3.72884e-05	0	0	0	4.93413e-05	0.000193874	0.00034257	4.34839e-05	4.10981e-05	5.35705e-05	0	0.000144285	3.48056e-05	6.30597e-05	5.26732e-05	0.000134517	0.00015797	0.000182637	0	9.19512e-05	0.000100817	0	0
Bacteria	Unknown KINGDOM	Proteobacteria	Gammaproteobacteria	Cardiobacteriales	Cardiobacteriaceae	0.00014264	0.000172612	0	0.000116347	0	4.56038e-05	0.000106413	4.85178e-05	0	0.000109872	0	0	0	0.000257782	0.000185943	0	9.87362e-05	0	0.00033761	0.00013217	0.000125955	0	0.000114273	4.05268e-05	7.70327e-05	4.93413e-05	0.000129249	0.000152253	4.34839e-05	0	0.000107141	0.00011956	3.60711e-05	0	0	0.000526732	0	5.26565e-05	0	6.39652e-05	0	0	3.89075e-05	0.000190876
Bacteria	Unknown KINGDOM	Proteobacteria	Gammaproteobacteria	Alteromonadales	Pseudoalteromonadaceae	0	0	0.000125676	0.000465387	0	4.56038e-05	0	0.000194071	3.50963e-05	0	0	0	9.20641e-05	0.000128891	0	0	0.000493681	0	0	0	0	0.000111865	0	0.000202634	0	0	0	0.00011419	0	0	5.35705e-05	0	7.21423e-05	3.48056e-05	0.000378358	0.000316039	0.000269034	0.00015797	6.08791e-05	0.000159913	0.000122602	0	0.000116722	0
Bacteria	Unknown KINGDOM	Firmicutes	Negativicutes	Selenomonadales	Acidaminococcaceae	0	0.000115075	0.000125676	0	0	0.000182415	0	0	0.000210578	0.000219744	0	9.71676e-05	0.000276192	6.44454e-05	0	0	0	0	0	0.00026434	0.00016794	0.00022373	0	4.05268e-05	0.000231098	0.000641437	0.000129249	7.61267e-05	0	0	5.35705e-05	0	0.000396782	3.48056e-05	0	0	0	0	0	6.39652e-05	0.000122602	0	7.7815e-05	0.000190876
Bacteria	Unknown KINGDOM	Actinobacteria	Actinobacteria	Actinomycetales	Kineosporiaceae	0	0	0.000125676	0.000116347	9.25797e-05	0.000228019	0.000248297	0	7.01927e-05	5.4936e-05	0.000237756	0.000242919	0	0	0	0	0	0.000123335	0	0.000198255	0	3.72884e-05	5.71363e-05	0	0	0	0	0.000152253	0	0	0.000160711	0	0	3.48056e-05	0.000189179	0.000105346	0.000134517	0.000105313	0	0	0	0	0.000233445	0
Eukaryota	Viridiplantae	Streptophyta	Unknown CLASS	Myrtales	Onagraceae	4.75466e-05	5.75374e-05	6.28378e-05	0.00069808	4.62899e-05	4.56038e-05	0	4.85178e-05	3.50963e-05	0.000109872	0.000237756	0	9.20641e-05	0	0.000185943	0	0	0	0	0.00013217	4.19851e-05	0	0	0	0	0	6.46245e-05	3.80633e-05	0.000130452	4.10981e-05	0	0.00041846	7.21423e-05	0	0.000252239	0.000158019	0.000134517	0.000105313	6.08791e-05	0	3.06504e-05	0	3.89075e-05	0
Bacteria	Unknown KINGDOM	Proteobacteria	Deltaproteobacteria	Syntrophobacterales	Syntrophaceae	0	0	0	0.000232693	0	4.56038e-05	0	0	0	5.4936e-05	0.000237756	0	0	0	0.000185943	0	0	0	0	6.60851e-05	0.00016794	0	0.000171409	8.10537e-05	0.000154065	0	6.46245e-05	0.00022838	4.34839e-05	0	0	0.00023912	0.000216427	3.48056e-05	0	0.000263366	0	0.000315939	0	6.39652e-05	0	0	0	0.000190876
Eukaryota	Metazoa	Chordata	Actinopterygii	Salmoniformes	Salmonidae	4.75466e-05	0	0	0	0	0	0	0	0	0.000109872	0	0	0	0	0	0	0	0	0	0	0.00016794	0	0	0	0	0	0.000129249	7.61267e-05	0.000260904	0	0.000428564	0	0.000360711	3.48056e-05	0.000126119	0	0	0	0	6.39652e-05	0	0	7.7815e-05	0.000381752
Eukaryota	Viridiplantae	Streptophyta	Unknown CLASS	Sapindales	Rutaceae	9.50932e-05	0	6.28378e-05	0	0.000185159	4.56038e-05	0.000106413	0	0	0	0	4.85838e-05	0	0	0.000185943	0	0	0.000123335	0	0.000198255	0	0.000111865	0.000171409	0.000162107	0.000192582	9.86826e-05	0	0	8.69679e-05	4.10981e-05	5.35705e-05	0.00017934	0	0.000139222	0.000189179	0	0.000269034	5.26565e-05	6.08791e-05	3.19826e-05	0.000153252	0.000151225	0.000116722	0
Eukaryota	Viridiplantae	Chlorophyta	Chlorophyceae	Chlamydomonadales	Chlamydomonadaceae	0.00014264	0.000115075	6.28378e-05	0	0.000324029	0.000136811	0.000212826	9.70356e-05	0.000175482	5.4936e-05	0	0	0	0.000193336	0	0	0	0.000123335	0	0.00013217	4.19851e-05	3.72884e-05	0	0	0	0.000148024	0	0	0	0	0	0	0.000180356	6.96112e-05	0	0	0	0.000210626	6.08791e-05	6.39652e-05	6.13008e-05	5.04083e-05	0.000350167	0.000190876
Eukaryota	Unknown KINGDOM	Unknown PHYLUM	Unknown CLASS	Kinetoplastida	Trypanosomatidae	4.75466e-05	5.75374e-05	0.000125676	0	0.000277739	9.12076e-05	3.54711e-05	4.85178e-05	3.50963e-05	0.000109872	0.000237756	0	0.000184128	0.000128891	0.000185943	0	0	0.000123335	0.000168805	0	0	7.45768e-05	0.000114273	0.000121581	7.70327e-05	0	0.000193874	7.61267e-05	0	0.000164393	5.35705e-05	0.00011956	3.60711e-05	6.96112e-05	0.000315298	5.26732e-05	0	0.00015797	0.000182637	6.39652e-05	0.000122602	0.000151225	7.7815e-05	0
Bacteria	Unknown KINGDOM	Bacteroidetes	Unknown CLASS	Bacteroidetes Order II. Incertae sedis	Rhodothermaceae	9.50932e-05	0.000115075	0.000125676	0	4.62899e-05	0.000228019	7.09421e-05	4.85178e-05	0.000105289	0	0.000118878	9.71676e-05	0	6.44454e-05	0	0.000136631	0	0	0	0.00026434	0	3.72884e-05	0	0	0	0	6.46245e-05	0	4.34839e-05	4.10981e-05	0	0.00011956	3.60711e-05	0.000174028	6.30597e-05	0	0.000134517	0.000105313	0.000182637	6.39652e-05	6.13008e-05	0.000201633	0.000116722	0
Viruses	Unknown KINGDOM	Unknown PHYLUM	Unknown CLASS	Unknown ORDER	Reoviridae	0	0.000115075	0.000188513	0	4.62899e-05	9.12076e-05	0	9.70356e-05	0.000105289	0.000164808	0	4.85838e-05	0	0	0.000185943	0.000136631	0.000394945	0.00024667	0.000168805	0	0	3.72884e-05	0.000342818	4.05268e-05	0	4.93413e-05	0	3.80633e-05	0	0	0.000160711	0.00017934	0.000144285	0.000174028	0	0	0	5.26565e-05	6.08791e-05	9.59478e-05	0.000153252	0	0	0.000190876
Viruses	Unknown KINGDOM	Unknown PHYLUM	Unknown CLASS	Unknown ORDER	Iridoviridae	0	0.00023015	0	0.00034904	9.25797e-05	9.12076e-05	0.000177355	0	0.000105289	0.000109872	0	0	0.000276192	0.000322227	0	0.000136631	0	0.000123335	0	0.000198255	0	0	0.000342818	4.05268e-05	0	4.93413e-05	0.000323123	7.61267e-05	4.34839e-05	0	5.35705e-05	0.00017934	0.000144285	0	0.000252239	0	0	0.000105313	0	6.39652e-05	0	0	0	0.000381752
Bacteria	Unknown KINGDOM	Actinobacteria	Actinobacteria	Rubrobacterales	Rubrobacteraceae	0.00014264	0	0	0.00034904	9.25797e-05	0	0	0	7.01927e-05	0	0.000118878	9.71676e-05	0.000276192	6.44454e-05	0	0	0.000296209	0	0	0.00013217	0.00016794	0	0	0.000121581	3.85164e-05	0.000246706	0	3.80633e-05	0	0	0	0.00011956	0	0.000104417	6.30597e-05	0	0	0.000105313	0	0.000191896	6.13008e-05	0	3.89075e-05	0.000381752
Viruses	Unknown KINGDOM	Unknown PHYLUM	Unknown CLASS	Unknown ORDER	Baculoviridae	0	0	0	0	0	9.12076e-05	0	4.85178e-05	7.01927e-05	5.4936e-05	0	4.85838e-05	0	0	0	0.000136631	0	0.000123335	0	0	0.000209925	0	0.000171409	8.10537e-05	0.000154065	0	6.46245e-05	0.000266443	0.000173936	0	0.000267852	0	0.000180356	0.000104417	0	5.26732e-05	0	0	0.000121758	0.00012793	9.19512e-05	5.04083e-05	7.7815e-05	0.000190876
Viruses	Unknown KINGDOM	Unknown PHYLUM	Unknown CLASS	Unknown ORDER	Bunyaviridae	0	0.00023015	0	0.000116347	0	0	0.000141884	0	0	5.4936e-05	0	9.71676e-05	0.000184128	0	0	0	0.000197472	0.00049334	0.000168805	0	8.39701e-05	3.72884e-05	0	8.10537e-05	3.85164e-05	9.86826e-05	6.46245e-05	0.000418697	0	0	0.000214282	5.978e-05	0	0	0.000189179	0.000105346	0	0.000105313	0	0.000191896	3.06504e-05	0	0	0.000381752
Bacteria	Unknown KINGDOM	Firmicutes	Clostridia	Halanaerobiales	Halanaerobiaceae	9.50932e-05	0	0	0	0	0	3.54711e-05	4.85178e-05	3.50963e-05	0	0	0	0	0	0	0.000136631	0	0	0.000168805	6.60851e-05	8.39701e-05	0	0.000228545	0	3.85164e-05	9.86826e-05	0.000129249	7.61267e-05	4.34839e-05	4.10981e-05	0.000267852	0	0.000180356	0.000104417	6.30597e-05	0.000105346	0	5.26565e-05	0	6.39652e-05	0	0	0	0
Eukaryota	Fungi	Ascomycota	Saccharomycetes	Saccharomycetales	Metschnikowiaceae	4.75466e-05	0	0	0	0	0	3.54711e-05	0	0	0	0	0	0	6.44454e-05	0	0	0	0.000123335	0	6.60851e-05	0	0	0.000171409	0.000243161	3.85164e-05	4.93413e-05	0.000129249	3.80633e-05	0	0	5.35705e-05	0	0.000252498	0	0.000126119	0.000210693	0.000134517	0.000315939	0	0	0	5.04083e-05	0.000116722	0
Viruses	Unknown KINGDOM	Unknown PHYLUM	Unknown CLASS	Unknown ORDER	Potyviridae	0.00028528	0	0.000188513	0	0	0.000136811	7.09421e-05	0	3.50963e-05	0.000109872	0.000237756	0	0	0	0.000185943	0.000136631	0.000197472	0	0	0	8.39701e-05	7.45768e-05	5.71363e-05	4.05268e-05	0	0	0	0	8.69679e-05	4.10981e-05	0.000107141	0.00011956	3.60711e-05	3.48056e-05	6.30597e-05	0	0	0.000315939	6.08791e-05	6.39652e-05	0	5.04083e-05	0	0.000190876
Bacteria	Unknown KINGDOM	Proteobacteria	Deltaproteobacteria	Myxococcales	Polyangiaceae	0	0	6.28378e-05	0	0	4.56038e-05	0	0	3.50963e-05	5.4936e-05	0	0	0	0	0	0	0	0.000123335	0	0.000330426	0	0	0.000342818	8.10537e-05	0	0	0.000193874	0	0	4.10981e-05	0	0	0.000144285	6.96112e-05	0.000126119	0	0	0.000263283	0	3.19826e-05	6.13008e-05	5.04083e-05	3.89075e-05	0.000190876
Eukaryota	Metazoa	Chordata	Mammalia	Pilosa	Cyclopedidae	0	0	0	0	0	0	0	0	0	0	0	0	0	0	0	0	0.000394945	0	0	0	0.00016794	0	0	0	0	0	0.00122787	0.00022838	0	0	0	0	0	0	0	0	0	0	0	6.39652e-05	0	0	0	0.000381752
Viruses	Unknown KINGDOM	Unknown PHYLUM	Unknown CLASS	Unknown ORDER	Bicaudaviridae	0	0.000172612	6.28378e-05	0.000232693	4.62899e-05	9.12076e-05	3.54711e-05	0	0.00038606	0.00027468	0	0.000291503	0	0	0	0	9.87362e-05	0	0.000168805	0.00026434	0	0	0.000114273	0	0	0	0	0	0	0	0	0.00017934	0	3.48056e-05	0.000126119	0	0	0.00015797	0.000182637	0	6.13008e-05	0	3.89075e-05	0.000190876
Eukaryota	Unknown KINGDOM	Unknown PHYLUM	Unknown CLASS	Unknown ORDER	Hexamitidae	0	0.000115075	0.000125676	0	0	0.000136811	0	0.000194071	7.01927e-05	0.000109872	0	4.85838e-05	0.000276192	0	0	0	0.000197472	0.000123335	0	6.60851e-05	0	7.45768e-05	0	8.10537e-05	0	0	0	0	0	0	0	0.00017934	0	0.000104417	0.000126119	0	0	0	0.000121758	3.19826e-05	0.000122602	0	0.000116722	0
Bacteria	Unknown KINGDOM	Proteobacteria	Gammaproteobacteria	Alteromonadales	Alteromonadaceae	4.75466e-05	5.75374e-05	6.28378e-05	0	0.00013887	9.12076e-05	0.000212826	0	0	0.000329616	0	4.85838e-05	0	0	0	0	0	0.00024667	0	6.60851e-05	0	7.45768e-05	0	0.000121581	3.85164e-05	0	0.000193874	0.00011419	0	0	0.000214282	0.00011956	7.21423e-05	0	0	0	0.000538068	0.00015797	6.08791e-05	0	0	0	7.7815e-05	0
Bacteria	Unknown KINGDOM	Bacteroidetes	Cytophagia	Cytophagales	Cytophagaceae	4.75466e-05	5.75374e-05	6.28378e-05	0	0	0	3.54711e-05	9.70356e-05	0.000105289	5.4936e-05	0	0.000194335	9.20641e-05	0	0	0.000136631	0.000296209	0	0	6.60851e-05	0	0	0.000171409	4.05268e-05	7.70327e-05	0.000148024	6.46245e-05	7.61267e-05	0	4.10981e-05	0	0	0.000108213	0.000139222	0	0	0	5.26565e-05	0	0.00012793	3.06504e-05	0.000252042	3.89075e-05	0
Archaea	Unknown KINGDOM	Crenarchaeota	Thermoprotei	Desulfurococcales	Pyrodictiaceae	0	0	0.000377027	0.000116347	0	4.56038e-05	0	0	0	5.4936e-05	0	0	0.000368256	0.000257782	0.000185943	0	0	0	0.000168805	0	0	3.72884e-05	0	0	7.70327e-05	4.93413e-05	6.46245e-05	7.61267e-05	8.69679e-05	0	0	0	7.21423e-05	0	0	0.000105346	0.000134517	0	0	3.19826e-05	9.19512e-05	5.04083e-05	0	0.000763504
Eukaryota	Fungi	Ascomycota	Sordariomycetes	Sordariales	Chaetomiaceae	0	0.000115075	0.000314189	0.000116347	0	0.000273623	3.54711e-05	9.70356e-05	0.000175482	0.000219744	0	9.71676e-05	0.000276192	0	0	0	0.000197472	0	0	0.00013217	0.00016794	3.72884e-05	5.71363e-05	0	3.85164e-05	0	0.000129249	3.80633e-05	0	0.000123294	5.35705e-05	0	0	3.48056e-05	0	0	0	0.00015797	0.000182637	3.19826e-05	0	0.000201633	3.89075e-05	0
Eukaryota	Metazoa	Chordata	Actinopterygii	Siluriformes	Callichthyidae	0	0	0	0	0	0	0	0	0	0	0	0	0	0	0	0	0	0	0	0	0	0	0.000114273	0.000405268	0	0	0	0	0	0	0.000107141	0	7.21423e-05	0	0	0	0	0	0	0	0	0	0	0
Bacteria	Unknown KINGDOM	Proteobacteria	Betaproteobacteria	Burkholderiales	Oxalobacteraceae	0	0.000172612	0	0	9.25797e-05	9.12076e-05	0.000141884	4.85178e-05	0.000140385	5.4936e-05	0.000237756	9.71676e-05	0	0.000128891	0	0	0	0.00024667	0.000168805	0.00013217	8.39701e-05	0.000111865	0	4.05268e-05	7.70327e-05	4.93413e-05	6.46245e-05	0	0	4.10981e-05	0	5.978e-05	0	3.48056e-05	0	0.000263366	0.000269034	0	0	9.59478e-05	3.06504e-05	0.000100817	0	0
Eukaryota	Metazoa	Chordata	Actinopterygii	Tetraodontiformes	Tetraodontidae	0	0	0.000377027	0.000116347	0	0	3.54711e-05	0	0	0	0	4.85838e-05	0	0	0.000185943	0	0	0	0	0.000330426	0	0	0	0	0	0	0	0	0	0	0	0	0	0	6.30597e-05	0.000158019	0	0.000210626	0	0	0	0	0.000427982	0.000190876
Eukaryota	Unknown KINGDOM	Unknown PHYLUM	Bangiophyceae	Bangiales	Bangiaceae	0.000190186	0	0.000125676	0	0	0.000136811	0	0	0	0	0.000356633	0	0	0	0	0	0	0	0	0.00026434	0	7.45768e-05	5.71363e-05	0.000202634	0.000192582	0	0	0	0	0	0	5.978e-05	0.000252498	0.000139222	0	5.26732e-05	0	0.00015797	0	9.59478e-05	3.06504e-05	0	0.000233445	0
Archaea	Unknown KINGDOM	Euryarchaeota	Methanomicrobia	Methanosarcinales	Methanosaetaceae	0	0.00023015	6.28378e-05	0	0	0.000136811	0.000106413	4.85178e-05	0	0	0	4.85838e-05	0	0	0.000185943	0	0.000197472	0.000123335	0	6.60851e-05	0.00025191	3.72884e-05	5.71363e-05	0	0	9.86826e-05	0	0	8.69679e-05	4.10981e-05	0.000107141	0.00011956	0	6.96112e-05	0	0	0	0.000105313	0	0	3.06504e-05	0.000100817	0.000116722	0
Bacteria	Unknown KINGDOM	Proteobacteria	Gammaproteobacteria	Thiotrichales	Francisellaceae	0	0.000172612	0	0.000116347	0	0.000136811	0	0	7.01927e-05	0	0.000594389	4.85838e-05	0.000184128	0	0.000185943	0	9.87362e-05	0	0	6.60851e-05	4.19851e-05	7.45768e-05	0	0	0	4.93413e-05	0	7.61267e-05	0	0	0.000160711	5.978e-05	0	0	0	0	0	5.26565e-05	0.000121758	0	3.06504e-05	0	3.89075e-05	0
Eukaryota	Metazoa	Nematoda	Chromadorea	Rhabditida	Dictyocaulidae	0.000190186	0	0	0	0	0	0.000106413	0	0.000210578	0	0	0	0	0	0	0	0	0	0	0	0	0	0	0.000202634	3.85164e-05	0.000148024	0	0.000190317	0	0.000164393	0.000428564	0	0	0	0	0	0	0	0	0	6.13008e-05	5.04083e-05	0	0
Bacteria	Unknown KINGDOM	Chloroflexi	Thermomicrobia	Sphaerobacterales	Sphaerobacteraceae	0.00014264	0	0	0	0	4.56038e-05	0	9.70356e-05	0.000105289	5.4936e-05	0.000118878	4.85838e-05	0	0	0	0.000136631	9.87362e-05	0.000123335	0	6.60851e-05	0	3.72884e-05	0.000171409	0	7.70327e-05	9.86826e-05	0.000258498	3.80633e-05	0	8.21963e-05	5.35705e-05	0	3.60711e-05	3.48056e-05	6.30597e-05	0	0	5.26565e-05	0.000182637	3.19826e-05	3.06504e-05	0	3.89075e-05	0
Archaea	Unknown KINGDOM	Euryarchaeota	Methanomicrobia	Methanomicrobiales	Methanospirillaceae	0	0.000115075	0.000251351	0	4.62899e-05	0.000319227	0.000106413	0.000194071	0.000140385	0.00175795	0	0.000145751	0	0	0	0	0	0	0	0	0	0	0	0	0	0	0	0	0	0	0.000321423	0	0	0	0	0	0	0	0	0	0	0	3.89075e-05	0
Archaea	Unknown KINGDOM	Euryarchaeota	Methanomicrobia	Methanocellales	Methanocellaceae	0	0.000115075	6.28378e-05	0.000116347	9.25797e-05	4.56038e-05	7.09421e-05	0	3.50963e-05	0	0	4.85838e-05	0.000828577	0.000128891	0	0	0	0	0	0.00013217	0.00016794	0.000186442	5.71363e-05	0	3.85164e-05	4.93413e-05	0	0	0	0	0	0	7.21423e-05	0	0.000441418	0.000210693	0.000134517	0.000105313	0	0	0	0.000100817	0	0
Bacteria	Unknown KINGDOM	Actinobacteria	Actinobacteria	Actinomycetales	Propionibacteriaceae	0.000237733	0.000172612	0.000251351	0	0.000185159	9.12076e-05	0.000106413	9.70356e-05	0.000105289	0.000109872	0	0.000194335	0	0.000257782	0.000185943	0	0	0	0.000168805	6.60851e-05	0	0	0	0	0	0	0	3.80633e-05	4.34839e-05	4.10981e-05	0	0	3.60711e-05	0.000174028	0	0	0	5.26565e-05	0.000121758	3.19826e-05	0	0	0	0.000190876
Eukaryota	Viridiplantae	Streptophyta	Unknown CLASS	Solanales	Convolvulaceae	0	5.75374e-05	0	0	0	9.12076e-05	0	0	0	0	0	0	0	0	0	0	9.87362e-05	0.000123335	0	0	0	0	0	0	0	0	0	0	4.34839e-05	0	0	0	0	0	0	0	0	0	0	0.0022068	0	0	0	0
Eukaryota	Metazoa	Arthropoda	Insecta	Lepidoptera	Noctuidae	9.50932e-05	5.75374e-05	0	0	4.62899e-05	4.56038e-05	3.54711e-05	0.000145553	0.000175482	0.000109872	0.000594389	9.71676e-05	0	0.000128891	0	0	0.000197472	0	0	0.000198255	0	7.45768e-05	0	0	3.85164e-05	0.000148024	6.46245e-05	0	0	4.10981e-05	0	0	0	6.96112e-05	0	0	0	0.000105313	0	3.19826e-05	0	5.04083e-05	0	0
Eukaryota	Fungi	Ascomycota	Sordariomycetes	Hypocreales	Clavicipitaceae	0.00014264	0.000115075	0	0	4.62899e-05	0	7.09421e-05	4.85178e-05	3.50963e-05	0	0.000237756	4.85838e-05	9.20641e-05	0	0	0.000273261	9.87362e-05	0.00024667	0.00033761	0	0	0	0	0	3.85164e-05	0.000148024	0	0	0	4.10981e-05	0	5.978e-05	3.60711e-05	0	6.30597e-05	0	0.000134517	5.26565e-05	0.000121758	6.39652e-05	3.06504e-05	0	0	0
Eukaryota	Viridiplantae	Streptophyta	Unknown CLASS	Ericales	Actinidiaceae	0	0	0	0	0	0	0	0	0	0	0	0	0	0	0	0	0	0	0	0	0	0	0	0	0	0	0	0	0	0	0	0	0	0	0	0	0	0	0	0	0	0	0	0
Bacteria	Unknown KINGDOM	Firmicutes	Clostridia	Clostridiales	Lachnospiraceae	0.00014264	0	0	0.000116347	0	0	3.54711e-05	4.85178e-05	0	5.4936e-05	0	0	0	0	0	0	0.000296209	0.000123335	0	0.000330426	0	0	0	0	0	9.86826e-05	6.46245e-05	0	0	0	0	0	0	0.000104417	0	5.26732e-05	0	0	0	0	0	0.000201633	0	0
Bacteria	Unknown KINGDOM	Firmicutes	Clostridia	Clostridiales	Syntrophomonadaceae	0	5.75374e-05	0.000251351	0	4.62899e-05	4.56038e-05	3.54711e-05	0	0	0	0.00130766	0	0.000276192	0	0	0	0	0	0	0	0	7.45768e-05	0	0.000121581	3.85164e-05	0	0	0	0	0	0.000160711	0	0.000108213	0	6.30597e-05	0	0	0	0	0	6.13008e-05	0	3.89075e-05	0
Viruses	Unknown KINGDOM	Unknown PHYLUM	Unknown CLASS	Unknown ORDER	Tectiviridae	0	0.000115075	0	0.00034904	0	0	0	0	7.01927e-05	0.000164808	0.000118878	0	0.000276192	0	0	0	0.000197472	0	0	0	0.000125955	0	0	0	0	0	6.46245e-05	7.61267e-05	0	0	0	0.00017934	0	0	0.000252239	0.000158019	0	0	0	0	0	0	0	0
Viruses	Unknown KINGDOM	Unknown PHYLUM	Unknown CLASS	Unknown ORDER	Orthomyxoviridae	0	0	0	0	9.25797e-05	9.12076e-05	7.09421e-05	0	0	0	0.000594389	0	0	0	0	0	0	0.000370005	0	6.60851e-05	0.000125955	7.45768e-05	5.71363e-05	0	0	0	0	0	4.34839e-05	0	0	5.978e-05	0	3.48056e-05	0	0.000105346	0.000269034	0	0.000121758	0	0	0	7.7815e-05	0
Viruses	Unknown KINGDOM	Unknown PHYLUM	Unknown CLASS	Unknown ORDER	Asfarviridae	0	0	0	0	0	0	0	0	0	0	0	0	0	0	0	0	0	0	0	0	8.39701e-05	0	5.71363e-05	0	0.000115549	0	0.000129249	0	0	0.000123294	0.000321423	0.00011956	7.21423e-05	6.96112e-05	0	0	0	0	0	0	0	0	0	0
Eukaryota	Viridiplantae	Streptophyta	Unknown CLASS	Caryophyllales	Caryophyllaceae	0	0.000115075	0	0.000116347	0	0	3.54711e-05	9.70356e-05	3.50963e-05	5.4936e-05	0.000237756	4.85838e-05	9.20641e-05	0	0	0.000136631	0.000197472	0	0	0	0	0	0.000114273	0	0	9.86826e-05	0	0	0	4.10981e-05	0	0	0	0	0	0	0	0.000105313	0.000121758	3.19826e-05	0	5.04083e-05	0	0
Bacteria	Unknown KINGDOM	Chlamydiae	Chlamydiia	Chlamydiales	Parachlamydiaceae	0	0.000115075	0.000188513	0.000116347	0	0	0	0	0	0	0	4.85838e-05	0	0	0	0	0	0	0	0	0	0	0.000114273	4.05268e-05	7.70327e-05	0	0	3.80633e-05	0	0	0	5.978e-05	0.000108213	3.48056e-05	0	5.26732e-05	0	0.000842504	0.000121758	3.19826e-05	0	0	0	0
Eukaryota	Viridiplantae	Streptophyta	Isoetopsida	Selaginellales	Selaginellaceae	0	5.75374e-05	0.000188513	0	0	0.000136811	0	9.70356e-05	3.50963e-05	0.000164808	0	9.71676e-05	0.000276192	0	0	0	0.000197472	0.000123335	0	6.60851e-05	0	7.45768e-05	0	0	0	0	0	0	0	0	0	0.00017934	0	6.96112e-05	0.000126119	0	0	0	0.000121758	0	0	0	0.000116722	0
Eukaryota	Unknown KINGDOM	Unknown PHYLUM	Cryptophyta	Pyrenomonadales	Geminigeraceae	0	5.75374e-05	0	0	4.62899e-05	4.56038e-05	0	0	0	0	0	4.85838e-05	0	6.44454e-05	0	0	0	0	0	0	4.19851e-05	0.000186442	0	0	0	0	0	0.00011419	0	0.000123294	0	0	0	0.000104417	0	0	0.000134517	0	0	0	9.19512e-05	0	0.00015563	0
Eukaryota	Fungi	Ascomycota	Sordariomycetes	Sordariales	Lasiosphaeriaceae	0	5.75374e-05	0.000188513	0	0	0	0	0	0	0	0	0	0	0	0	0	0	0	0	0	4.19851e-05	3.72884e-05	0	4.05268e-05	0.000192582	0	0	0	0	0	0	0	0	0	0	5.26732e-05	0	0.000368596	6.08791e-05	0	3.06504e-05	0	0	0
Bacteria	Unknown KINGDOM	Acidobacteria	Acidobacteriia	Acidobacteriales	Acidobacteriaceae	0	0	0	0.000116347	4.62899e-05	0	0	9.70356e-05	0	0	0	9.71676e-05	0.000184128	0	0	0	0	0	0	0	0	0	0	0	0	0	0	0.00022838	0	0	0.000374993	0	0	3.48056e-05	0	0	0	0	0	0	6.13008e-05	0	0	0
Bacteria	Unknown KINGDOM	Proteobacteria	Gammaproteobacteria	Oceanospirillales	Hahellaceae	9.50932e-05	0	0	0.000116347	0	0	0	0	0	5.4936e-05	0	0	0	0	0.000371885	0	0	0	0	0	0	0	5.71363e-05	0	0	0	6.46245e-05	0.00011419	4.34839e-05	0	0	0	0	0	0.000126119	0.000210693	0.000134517	0	0	3.19826e-05	0	5.04083e-05	0	0
Viruses	Unknown KINGDOM	Unknown PHYLUM	Unknown CLASS	Unknown ORDER	Togaviridae	0.00014264	0	0	0.000116347	0	0	0	0	0	0	0	0	0	0	0	0	0	0	0	0	4.19851e-05	0	0.000171409	0.000121581	7.70327e-05	0	0.000129249	0	8.69679e-05	4.10981e-05	0	0	3.60711e-05	3.48056e-05	0	5.26732e-05	0	0.000105313	0	0	0	0	0	0
Bacteria	Unknown KINGDOM	Proteobacteria	Gammaproteobacteria	Oceanospirillales	Oceanospirillaceae	0	0	0	0	0	4.56038e-05	0	0	3.50963e-05	5.4936e-05	0	0	0	0	0	0.000136631	9.87362e-05	0	0	0	0	0.000261019	5.71363e-05	0	3.85164e-05	0	0	7.61267e-05	0	0	0	5.978e-05	0	0	0.000126119	0.000105346	0.000403551	0	6.08791e-05	0	0	0.000100817	0	0
Archaea	Unknown KINGDOM	Euryarchaeota	Methanomicrobia	Methanomicrobiales	Methanoregulaceae	0	0	0	0	0	0	0.000106413	0	0.000105289	0	0	0	0	0	0.000185943	0	0	0	0	6.60851e-05	4.19851e-05	0	0.000171409	4.05268e-05	7.70327e-05	0	0	0	4.34839e-05	8.21963e-05	0.000107141	0	0.00032464	3.48056e-05	6.30597e-05	0	0	5.26565e-05	0	0	0	0	0	0
Bacteria	Unknown KINGDOM	Proteobacteria	Deltaproteobacteria	Myxococcales	Cystobacteraceae	0.00014264	0	0	0	0	0	0	0	0	0	0	0	0	6.44454e-05	0	0	0	0	0	0.000330426	8.39701e-05	0	0	8.10537e-05	0	4.93413e-05	0	0	0	0	0	0	0	6.96112e-05	0	0	0.000134517	0	0	0	0	5.04083e-05	0	0
Bacteria	Unknown KINGDOM	Actinobacteria	Actinobacteria	Actinomycetales	Nocardioidaceae	9.50932e-05	5.75374e-05	0	0.000116347	0	0	0	4.85178e-05	0	0	0	0	9.20641e-05	6.44454e-05	0	0.000136631	0	0.00024667	0	0	0	0.000111865	0.000114273	0	0	4.93413e-05	0.000129249	3.80633e-05	4.34839e-05	0	0.000160711	0.0002989	3.60711e-05	0	0.000126119	0	0.000269034	5.26565e-05	0	3.19826e-05	0	0	7.7815e-05	0
Eukaryota	Metazoa	Chordata	Unknown CLASS	Squamata	Viperidae	0	0	0.000125676	0	0	0	0	9.70356e-05	0	0	0	0	0	0	0	0.000136631	9.87362e-05	0.000123335	0	6.60851e-05	0	0.000186442	0	4.05268e-05	3.85164e-05	0	0	0	0	0	0.000107141	0	7.21423e-05	0	0	5.26732e-05	0	0.000105313	0	0	6.13008e-05	0	3.89075e-05	0
Viruses	Unknown KINGDOM	Unknown PHYLUM	Unknown CLASS	Picornavirales	Secoviridae	0	0	0.000125676	0	0	0	0	4.85178e-05	0	0	0.000118878	9.71676e-05	0	0	0	0	0	0.00024667	0	0	0	0	0	0	0	0	0	0	0	0	0	0	0	0	0	0.000105346	0.000134517	0.000263283	0	0	0	0	0	0
Archaea	Unknown KINGDOM	Euryarchaeota	Methanomicrobia	Methanomicrobiales	Methanomicrobiaceae	0.00014264	0	6.28378e-05	0.000232693	0.00013887	0	0	4.85178e-05	3.50963e-05	0	0	0	9.20641e-05	0.000257782	0	0	0	0	0	0.000198255	4.19851e-05	0	0	0	7.70327e-05	0	6.46245e-05	0	0	0	0	0.00011956	0	0	0.000252239	5.26732e-05	0	0	0	3.19826e-05	0	0	0.000116722	0
Bacteria	Unknown KINGDOM	Planctomycetes	Planctomycetia	Planctomycetales	Planctomycetaceae	4.75466e-05	0.000115075	0	0.000465387	0	0	3.54711e-05	0	0	0	0	4.85838e-05	0.000368256	0	0	0	0	0	0	0	0	0	0	0	0	0	0	0	0	4.10981e-05	0	0	3.60711e-05	0	0.000252239	0.000210693	0	0	0	0	3.06504e-05	0.000100817	0	0
Bacteria	Unknown KINGDOM	Proteobacteria	Gammaproteobacteria	Alteromonadales	Psychromonadaceae	4.75466e-05	0	6.28378e-05	0	4.62899e-05	0	3.54711e-05	4.85178e-05	7.01927e-05	5.4936e-05	0	4.85838e-05	0	0.000128891	0	0.000136631	0	0.000123335	0	6.60851e-05	0.000125955	7.45768e-05	0	0	0	0	0	0	4.34839e-05	0	0.000321423	0	0.000108213	0	0	0.000210693	0	0.000105313	0	0	0	5.04083e-05	0	0
Eukaryota	Fungi	Basidiomycota	Tremellomycetes	Tremellales	Tremellaceae	0	5.75374e-05	6.28378e-05	0	0	0	0	4.85178e-05	0.000105289	0	0	0	0	0	0.000185943	0	0	0	0	0	8.39701e-05	0.000111865	0	4.05268e-05	3.85164e-05	4.93413e-05	0	0	4.34839e-05	0	5.35705e-05	0	7.21423e-05	3.48056e-05	0	0.000210693	0	0	0	3.19826e-05	3.06504e-05	0	0	0
Eukaryota	Metazoa	Chordata	Mammalia	Rodentia	Caviidae	0	5.75374e-05	0	0	9.25797e-05	4.56038e-05	7.09421e-05	0	0.000105289	5.4936e-05	0	9.71676e-05	0	6.44454e-05	0	0	0.000197472	0	0	0	0	0	5.71363e-05	8.10537e-05	0	0	0	7.61267e-05	0	0	0	0	0	3.48056e-05	6.30597e-05	0	0	0	6.08791e-05	0	6.13008e-05	0	0	0
Bacteria	Unknown KINGDOM	Chloroflexi	Thermomicrobia	Thermomicrobiales	Thermomicrobiaceae	0	5.75374e-05	0.000125676	0	0	0	0	0	3.50963e-05	0	0	0	0	0	0	0	0.000197472	0	0	0	0	7.45768e-05	0	0	0	0	0	0	0	0	0	0	0	0	0.000252239	0	0	0.000368596	0	0	3.06504e-05	0	0	0
Eukaryota	Viridiplantae	Streptophyta	Mesostigmatophyceae	Mesostigmatales	Mesostigmataceae	0	0	0	0	0	0	0	0	7.01927e-05	0	0	0	0	0	0	0	0	0	0	6.60851e-05	0	0	0	8.10537e-05	0.000154065	4.93413e-05	6.46245e-05	3.80633e-05	0	0.000123294	0	5.978e-05	3.60711e-05	3.48056e-05	0	0.000158019	0	0.000105313	0	0	6.13008e-05	5.04083e-05	3.89075e-05	0
Eukaryota	Viridiplantae	Streptophyta	Unknown CLASS	Lamiales	Lamiaceae	0.000237733	5.75374e-05	0	0	0.000185159	4.56038e-05	3.54711e-05	0	3.50963e-05	5.4936e-05	0	0	0	0	0	0.000136631	0	0	0	0.000198255	0	0	0	0	0	0	0	0	0	4.10981e-05	5.35705e-05	0.00011956	0	6.96112e-05	0	0	0	5.26565e-05	0	0	6.13008e-05	5.04083e-05	0	0
Eukaryota	Viridiplantae	Streptophyta	Unknown CLASS	Malpighiales	Euphorbiaceae	0	0	0.000314189	0	0	4.56038e-05	0	0	0	0	0	0	9.20641e-05	0	0	0	0	0	0.000168805	6.60851e-05	0	0	0	0	3.85164e-05	0	0	3.80633e-05	0	0	0.000107141	0	3.60711e-05	0	0	0	0	0.00015797	0	0	0	0	0	0.000190876
Viruses	Unknown KINGDOM	Unknown PHYLUM	Unknown CLASS	Unknown ORDER	Retroviridae	0	5.75374e-05	0	0	0	4.56038e-05	3.54711e-05	0.000339624	7.01927e-05	5.4936e-05	0	0	0	6.44454e-05	0	0	9.87362e-05	0	0	0	0	0	0	0	3.85164e-05	4.93413e-05	0	3.80633e-05	0	0	0.000107141	0.00017934	0	0	0	0	0	5.26565e-05	0.000121758	3.19826e-05	6.13008e-05	5.04083e-05	3.89075e-05	0.000190876
Viruses	Unknown KINGDOM	Unknown PHYLUM	Unknown CLASS	Unknown ORDER	Phycodnaviridae	0	5.75374e-05	0	0.000116347	4.62899e-05	0	0.000106413	0	3.50963e-05	0	0	9.71676e-05	9.20641e-05	0	0	0.000273261	9.87362e-05	0	0	0	4.19851e-05	0	0.000171409	4.05268e-05	0	0	0.000129249	0	4.34839e-05	0	0	5.978e-05	0	0	6.30597e-05	0	0	0	6.08791e-05	0	0	0	0	0
Bacteria	Unknown KINGDOM	Nitrospirae	Nitrospira	Nitrospirales	Nitrospiraceae	0	0.000115075	0	0.000116347	4.62899e-05	0	0	0	0	0	0	0	0.000276192	0	0	0	0	0	0	0	0	3.72884e-05	5.71363e-05	0	0	4.93413e-05	0.000129249	0	0	8.21963e-05	0	0.00017934	0	0	0.000126119	0	0	0	0	3.19826e-05	0	0.000100817	0	0
Bacteria	Unknown KINGDOM	Actinobacteria	Actinobacteria	Actinomycetales	Beutenbergiaceae	0	5.75374e-05	0.000251351	0	0	9.12076e-05	0	9.70356e-05	3.50963e-05	0	0	0	9.20641e-05	0	0	0	9.87362e-05	0.000123335	0	0	4.19851e-05	0	0	0	0	0	0	0	0	4.10981e-05	0	0	0	0.000139222	6.30597e-05	0	0	0.000105313	0	0	3.06504e-05	0	0	0
Bacteria	Unknown KINGDOM	Acidobacteria	Solibacteres	Solibacterales	Solibacteraceae	0	0	0	0	0	0	0	0	0	0	0	0	0	0	0	0	0	0	0	0	0	0	0	0	0.000231098	0.000148024	6.46245e-05	7.61267e-05	0	4.10981e-05	0.000160711	0	0	0	0	0	0	0	0.000121758	0.000319826	0	0	0	0
Bacteria	Unknown KINGDOM	Proteobacteria	Alphaproteobacteria	Sphingomonadales	Erythrobacteraceae	4.75466e-05	0	0.000125676	0	4.62899e-05	0	3.54711e-05	0	3.50963e-05	0	0	4.85838e-05	9.20641e-05	6.44454e-05	0	0.000136631	9.87362e-05	0	0	6.60851e-05	0	0	0	0	0	0	0	0	0	0	0	0	3.60711e-05	6.96112e-05	0	0	0	0.000210626	0	0	0	5.04083e-05	0	0.000190876
Bacteria	Unknown KINGDOM	Dictyoglomi	Dictyoglomia	Dictyoglomales	Dictyoglomaceae	0	5.75374e-05	0	0	0	0	3.54711e-05	0	3.50963e-05	0	0.000237756	0	0	0	0	0	0.000197472	0	0	0	4.19851e-05	0	0	0	3.85164e-05	0	6.46245e-05	0	0	0	0	0	3.60711e-05	0	0	0.000105346	0.000134517	5.26565e-05	0	3.19826e-05	0	5.04083e-05	0.000116722	0
Bacteria	Unknown KINGDOM	Proteobacteria	Gammaproteobacteria	Oceanospirillales	Alcanivoracaceae	0	0	0	0.00034904	0	0	0	0	0	0.000109872	0.000118878	0	0.000184128	0	0.000185943	0.000273261	0	0	0	0	0	0	0	0	0	4.93413e-05	6.46245e-05	0	4.34839e-05	0	0	0	3.60711e-05	3.48056e-05	0	0	0.000134517	5.26565e-05	0	3.19826e-05	0	0	3.89075e-05	0
Viruses	Unknown KINGDOM	Unknown PHYLUM	Unknown CLASS	Mononegavirales	Rhabdoviridae	0	5.75374e-05	0.000125676	0	0	4.56038e-05	3.54711e-05	0	0	5.4936e-05	0	0	0	0.000128891	0	0	0	0	0	0	4.19851e-05	3.72884e-05	5.71363e-05	4.05268e-05	3.85164e-05	4.93413e-05	0	0	0	0	0.000214282	0	0.000108213	0	6.30597e-05	5.26732e-05	0	0.000105313	6.08791e-05	0	6.13008e-05	0	0	0
Eukaryota	Viridiplantae	Streptophyta	Unknown CLASS	Malpighiales	Salicaceae	0	5.75374e-05	0	0	0	0	0	0	0	0	0	0	9.20641e-05	0	0	0.000136631	0	0	0	0	0	0	0	8.10537e-05	0	0	0	0	0	0	5.35705e-05	0	3.60711e-05	6.96112e-05	0.000126119	5.26732e-05	0	5.26565e-05	0	0	0	0	0	0.000190876
Bacteria	Unknown KINGDOM	Tenericutes	Mollicutes	Entomoplasmatales	Entomoplasmataceae	0	0	0.000125676	0	0	0	0	0	0	5.4936e-05	0	4.85838e-05	0.000368256	0	0	0	9.87362e-05	0	0	0	4.19851e-05	0	0	0	0	0	0.000193874	0	0	0	0	0	0	0	0	0	0.000134517	0	0.000182637	0	0	0	0	0
Eukaryota	Metazoa	Chordata	Mammalia	Perissodactyla	Equidae	0	5.75374e-05	0	0	0	0.000228019	0	0	3.50963e-05	0	0	9.71676e-05	0.000184128	0	0	0	0	0.000123335	0	6.60851e-05	0	0	0	4.05268e-05	0	4.93413e-05	0	0	0	0	0	0	0	0	0	0	0	0	0.000121758	0	0	0	7.7815e-05	0
Eukaryota	Metazoa	Chordata	Aves	Struthioniformes	Struthionidae	9.50932e-05	0.000172612	0	0.000232693	0	0	0	0	3.50963e-05	0	0	4.85838e-05	0	6.44454e-05	0	0	9.87362e-05	0	0	0	8.39701e-05	0	0	0	7.70327e-05	0	0	0	0	0	0	0	0	0	0.000252239	0	0	0	0	0.00012793	0	0	0	0
Eukaryota	Fungi	Ascomycota	Dothideomycetes	Pleosporales	Pleosporaceae	0.000190186	5.75374e-05	0	0	0.00013887	0	3.54711e-05	0	3.50963e-05	0	0	0	0	6.44454e-05	0	0	0	0	0.00033761	0	0.000125955	0	0	0	0	4.93413e-05	0	3.80633e-05	0	0	5.35705e-05	0.00011956	3.60711e-05	3.48056e-05	0	5.26732e-05	0	0.000105313	0	0	0	0.000151225	0	0
Bacteria	Unknown KINGDOM	Actinobacteria	Actinobacteria	Actinomycetales	Acidothermaceae	0.000855839	0	6.28378e-05	0	0	0	7.09421e-05	0	0	0	0	4.85838e-05	0	0.000193336	0	0	9.87362e-05	0	0	0	0	0	0	0	0	0	0	0	0	0	0	5.978e-05	0	0	0	0.000105346	0.000269034	0	0	0	0	0	0	0
Eukaryota	Metazoa	Porifera	Demospongiae	Astrophorida	Geodiidae	0	0	0	0	0	0	0	0	0	0	0	0	0	0	0	0.000136631	0	0	0	6.60851e-05	4.19851e-05	0	0	0	0	0	0.000129249	7.61267e-05	0	0	0	0	0	0	0	0	0	0	0	0	0	0	0	0
Eukaryota	Fungi	Ascomycota	Dothideomycetes	Pleosporales	Phaeosphaeriaceae	0	5.75374e-05	0	0	0	0	0	4.85178e-05	3.50963e-05	0.000109872	0	0	0	0	0	0	0	0.000123335	0	0	4.19851e-05	0.000111865	0	0.000121581	0	0	6.46245e-05	0.00011419	0	0	0	0	7.21423e-05	0	0	5.26732e-05	0	0.000105313	0	0	9.19512e-05	0	7.7815e-05	0
Eukaryota	Metazoa	Chordata	Mammalia	Carnivora	Canidae	4.75466e-05	0.000115075	6.28378e-05	0	4.62899e-05	9.12076e-05	0	0	0.000105289	0	0.000118878	0	0	0	0	0	0	0	0	0	0	0	0	0	0	0	0	3.80633e-05	0	0	0	0	0	6.96112e-05	0	0	0	0	0	9.59478e-05	0	5.04083e-05	0.000233445	0
Viruses	Unknown KINGDOM	Unknown PHYLUM	Unknown CLASS	Mononegavirales	Paramyxoviridae	0	0	0.000125676	0	9.25797e-05	4.56038e-05	0	4.85178e-05	7.01927e-05	5.4936e-05	0.000118878	9.71676e-05	0	6.44454e-05	0	0	0	0	0.000168805	0	4.19851e-05	0	0	0	7.70327e-05	0	0	3.80633e-05	0	4.10981e-05	0.000160711	0	0	0	0	0	0	0	0	6.39652e-05	6.13008e-05	0	0.000116722	0
Bacteria	Unknown KINGDOM	Proteobacteria	Gammaproteobacteria	Alteromonadales	Idiomarinaceae	4.75466e-05	0	0	0	0	0	0	0	0	0	0	0	0	0	0	0	0	0	0	0	0	7.45768e-05	5.71363e-05	4.05268e-05	0	4.93413e-05	6.46245e-05	0	0.000739227	0	0	0	0.000108213	0.000208834	0	0	0.000134517	0	0	0	0	0	0.000116722	0
Eukaryota	Viridiplantae	Chlorophyta	Chlorophyceae	Sphaeropleales	Scenedesmaceae	0	0	0	0	0	0	0	0	0	0	0.000118878	0	0	0	0	0	0	0	0	0	0.000125955	0	5.71363e-05	0	0	4.93413e-05	0	3.80633e-05	0	0	5.35705e-05	0	0.000144285	0	0	0.000105346	0	0	0	3.19826e-05	0	0	0	0.000381752
Bacteria	Unknown KINGDOM	Actinobacteria	Actinobacteria	Coriobacteriales	Coriobacteriaceae	0	5.75374e-05	0	0.000116347	0	0	0	0	0	0	0	4.85838e-05	0	6.44454e-05	0	0	0	0	0	0	8.39701e-05	0.000149154	0.000114273	8.10537e-05	0	0	0	0	0	8.21963e-05	0	0	0	0	0	0	0	0	0	9.59478e-05	6.13008e-05	5.04083e-05	3.89075e-05	0
Bacteria	Unknown KINGDOM	Firmicutes	Bacilli	Bacillales	Thermoactinomycetaceae	0	5.75374e-05	0	0	4.62899e-05	0	0	4.85178e-05	0	5.4936e-05	0	0	9.20641e-05	0	0	0	0	0	0	0	4.19851e-05	0	0	4.05268e-05	0	0	0	3.80633e-05	0	0	5.35705e-05	0.00011956	3.60711e-05	3.48056e-05	0	0	0	0	6.08791e-05	3.19826e-05	3.06504e-05	0	0	0
Bacteria	Unknown KINGDOM	Actinobacteria	Actinobacteria	Actinomycetales	Pseudonocardiaceae	0	0	0	0	4.62899e-05	0	0.000177355	0.000145553	0	0	0	0	9.20641e-05	0	0	0.000136631	9.87362e-05	0	0	6.60851e-05	4.19851e-05	0	0	0	0	0	0	3.80633e-05	0	0	0	0	0	0	0	5.26732e-05	0	0	0	3.19826e-05	0	0	3.89075e-05	0
Bacteria	Unknown KINGDOM	Aquificae	Aquificae	Aquificales	Hydrogenothermaceae	0.000190186	0	0	0	0	9.12076e-05	3.54711e-05	0	0	0	0	0	0	0	0	0	0	0	0	0.00026434	4.19851e-05	7.45768e-05	0	8.10537e-05	0.000115549	0	0	0	0	4.10981e-05	0	0	0	0	0	5.26732e-05	0	0	0	0	0	0	0	0
Eukaryota	Viridiplantae	Streptophyta	Bryopsida	Funariales	Funariaceae	0	0	0	0	4.62899e-05	0	0.000106413	0	0.000105289	0	0	0	0	6.44454e-05	0	0	0	0	0	0	0	0	0	0	0	0	0	0.00011419	0	0	5.35705e-05	5.978e-05	3.60711e-05	0	0.000126119	5.26732e-05	0	5.26565e-05	0	0	0	5.04083e-05	0	0
Eukaryota	Fungi	Ascomycota	Eurotiomycetes	Eurotiales	Elaphomycetaceae	0	0	0	0	0	0	0	0	0	0	0	0	0	6.44454e-05	0	0.000136631	0	0	0	0	8.39701e-05	0	0	0	0	0	0	0	4.34839e-05	0	0	0	0.000144285	0	0	0	0	0	0	0	0	0	3.89075e-05	0
Bacteria	Unknown KINGDOM	Actinobacteria	Actinobacteria	Actinomycetales	Thermomonosporaceae	0	0.000115075	0.000125676	0.000232693	0	0	0	0	0	0	0	0	0	0.000128891	0	0	9.87362e-05	0.000123335	0.000168805	0.000198255	0	0	0	4.05268e-05	0	0	0	0	0	0	0	5.978e-05	0	0	0	0	0	0.00015797	0	0	0	0	0	0
Bacteria	Unknown KINGDOM	Proteobacteria	Betaproteobacteria	Methylophilales	Methylophilaceae	0	0	6.28378e-05	0	0	0	0	0	0	0	0	0	0	0	0	0	0	0	0.000168805	0	0	7.45768e-05	0	4.05268e-05	0	0	0	0	4.34839e-05	0	0	0	3.60711e-05	0.000104417	0	0	0	0	0	0	0	0	0	0
Bacteria	Unknown KINGDOM	Verrucomicrobia	Verrucomicrobiae	Verrucomicrobiales	Verrucomicrobiaceae	0	5.75374e-05	6.28378e-05	0.000116347	0	4.56038e-05	0	0	0	0	0.000118878	0	9.20641e-05	0	0	0	0	0	0	0	4.19851e-05	0	0	0	0	0	6.46245e-05	0	0	0	5.35705e-05	0	0.000108213	0	0.000189179	0	0	0.000105313	0	0	0	0.000100817	3.89075e-05	0
Eukaryota	Fungi	Ascomycota	Eurotiomycetes	Onygenales	Onygenaceae	0	0	0	0	0	0	0	0	0	0	0	0	0	0	0	0	0	0	0	6.60851e-05	0	3.72884e-05	0	0	0	4.93413e-05	0	0.000190317	0	0	0	0	0	3.48056e-05	0	0	0	0	0	0	9.19512e-05	5.04083e-05	0	0.000190876
Eukaryota	Viridiplantae	Streptophyta	Unknown CLASS	Lamiales	Plantaginaceae	0	0.000115075	0	0	0.000185159	0	0	0	0	0	0	0	0	0.000257782	0	0	0	0	0	0	0	0	0	0	0	0	0	0	0	0	0	0.00035868	0	0	0.000189179	0	0	0	0	0	0.000153252	0.000201633	0	0
Bacteria	Unknown KINGDOM	Verrucomicrobia	Unknown CLASS	Methylacidiphilales	Methylacidiphilaceae	0	0	0	0	0	0	0	0	0	0	0.000118878	4.85838e-05	0	0	0	0	0.000197472	0	0	0	0	0	0	0	0	0	0.000193874	0	0	4.10981e-05	0	0	0	0	0	0	0	0.000105313	6.08791e-05	0	0	0	0	0.000190876
Eukaryota	Unknown KINGDOM	Unknown PHYLUM	Oligohymenophorea	Hymenostomatida	Tetrahymenidae	0	0	6.28378e-05	0	0	4.56038e-05	3.54711e-05	0	0	5.4936e-05	0	4.85838e-05	0	0	0	0	0	0	0	0	0	0	0.000114273	4.05268e-05	0	0	0	0	0	0.000287687	0	5.978e-05	0	3.48056e-05	0	0	0	0	0	0	6.13008e-05	0	3.89075e-05	0
Eukaryota	Metazoa	Chordata	Unknown CLASS	Squamata	Elapidae	0	5.75374e-05	0	0	0	0	0	4.85178e-05	0	0.000164808	0	0	0	0	0	0.000136631	0	0	0.000168805	0	0	0	0	0	0	4.93413e-05	0	0	0	0	0.000160711	0	3.60711e-05	0	0	0	0	0	0	3.19826e-05	3.06504e-05	0	0	0
Eukaryota	Viridiplantae	Streptophyta	Polypodiopsida	Polypodiales	Pteridaceae	0	0	0	0	0	0	0	9.70356e-05	0	0	0	0	0	0	0	0	0	0	0.000168805	0	0	0	0.000228545	0.000162107	0	0	0	0	0.000173936	0	0.000428564	0	0.000144285	0	0	0	0	0	0	0	0	0	0	0
Eukaryota	Metazoa	Arthropoda	Insecta	Hymenoptera	Vespidae	0	5.75374e-05	0	0	0	4.56038e-05	3.54711e-05	9.70356e-05	0.000175482	0	0.000118878	4.85838e-05	9.20641e-05	0.000128891	0	0.000273261	0	0	0	0	0	0	0	0	0	0	0	0	0	0	0	0	0	0	0	5.26732e-05	0	0	0	0	0	0	0	0
Eukaryota	Unknown KINGDOM	Unknown PHYLUM	Cryptophyta	Pyrenomonadales	Pyrenomonadaceae	0	0.000115075	0	0	0	0	0	0	0	0	0	0	9.20641e-05	6.44454e-05	0	0	0	0	0	0	8.39701e-05	0	0	0	0	0	0	0	8.69679e-05	4.10981e-05	0	0	7.21423e-05	0	0	0	0	0	0	6.39652e-05	0	5.04083e-05	0	0
Eukaryota	Metazoa	Chordata	Actinopterygii	Gadiformes	Gadidae	0	0	0	0	0	0	0	0	0	0	0	0	0	0	0	0	0	0	0	0	0	0	0	0	0	0	0	0	0	0	0	0	0	0	0	0	0	0	0	0	0	0	0	0
Eukaryota	Unknown KINGDOM	Unknown PHYLUM	Glaucocystophyceae	Unknown ORDER	Cyanophoraceae	9.50932e-05	5.75374e-05	0	0.000116347	4.62899e-05	4.56038e-05	7.09421e-05	0	3.50963e-05	5.4936e-05	0	0	0	0	0	0	0	0	0	0	0	0	5.71363e-05	0	3.85164e-05	0	0	0	0	0.000164393	0	0	0	6.96112e-05	0	0	0	0	6.08791e-05	0	3.06504e-05	0	3.89075e-05	0
Eukaryota	Metazoa	Arthropoda	Insecta	Coleoptera	Scarabaeidae	0	0	0	0.000116347	0	0	3.54711e-05	0	3.50963e-05	0	0	0	0	0	0	0	0	0	0	0	0	0	0	0	0	0	0	0	0	0	5.35705e-05	0	0	0	0	5.26732e-05	0	0.00015797	0	0	0	0	0	0.000190876
Eukaryota	Viridiplantae	Streptophyta	Unknown CLASS	Ranunculales	Ranunculaceae	4.75466e-05	0	0	0	0	0	0	0	0	0	0	0	0	0	0	0	0	0	0	0	8.39701e-05	0	0	0	0	0	0	0.00022838	0.00021742	0	5.35705e-05	0	0	0	0	0	0	0	0	0.000223878	0	0	0	0.000190876
Eukaryota	Fungi	Ascomycota	Dothideomycetes	Pleosporales	Leptosphaeriaceae	0	0	6.28378e-05	0	0	9.12076e-05	0	4.85178e-05	7.01927e-05	0	0.000713267	0	9.20641e-05	0	0	0	0	0	0	6.60851e-05	0	0	0	0	0	9.86826e-05	0	0	0	0	0	0	0	0	0	5.26732e-05	0	0	0	0	0	0	0	0
Bacteria	Unknown KINGDOM	Gemmatimonadetes	Gemmatimonadetes	Gemmatimonadales	Gemmatimonadaceae	0	0	0	0	4.62899e-05	0	0	0	0	0	0	0	9.20641e-05	0	0	0	0	0	0	6.60851e-05	0	0	0	0	0	0	0	0	0	0	0	0	0	0	0	0	0	0	0	0	3.06504e-05	5.04083e-05	0	0
Viruses	Unknown KINGDOM	Unknown PHYLUM	Unknown CLASS	Unknown ORDER	Flaviviridae	0	0	6.28378e-05	0	0.00013887	0	0	0	0	0	0	0	0	0	0	0	0	0.000123335	0.000168805	0.00013217	0	0	0	0.000486322	0	0	0	0	0	0	0.000107141	0	3.60711e-05	0	0	0	0	0	0	0	0	0	0	0
Eukaryota	Viridiplantae	Streptophyta	Unknown CLASS	Caryophyllales	Polygonaceae	9.50932e-05	0	0	0	0	0	0	0	0	0	0	0	0	0	0	0	0	0.000123335	0	0	0	0	0	0	0	0	0	0	0	0	0	0	3.60711e-05	0	0	0	0	0	0	0	0	0	0	0
Viruses	Unknown KINGDOM	Unknown PHYLUM	Unknown CLASS	Unknown ORDER	Caliciviridae	0	0	6.28378e-05	0	0	4.56038e-05	0	0	0	0	0	0	0	0	0	0.000136631	0	0	0	0	0	0	0	4.05268e-05	0.000115549	0	0	0	4.34839e-05	0	0.000107141	0	0	0	0.000252239	0	0	0.000105313	0	3.19826e-05	0	0	0	0.000190876
Bacteria	Unknown KINGDOM	Proteobacteria	Deltaproteobacteria	Syntrophobacterales	Syntrophobacteraceae	0.00014264	0	0	0	9.25797e-05	0	0	0	0	0	0	9.71676e-05	0	0	0	0	0	0	0	6.60851e-05	0	0	0	0	3.85164e-05	0	6.46245e-05	0	0	0	0	0	3.60711e-05	0.000104417	0	0	0	0	0	0	0	0	0	0
Eukaryota	Viridiplantae	Streptophyta	Coniferopsida	Coniferales	Pinaceae	0	0	0	0	9.25797e-05	4.56038e-05	0	0	0	0	0	0	9.20641e-05	0	0	0	9.87362e-05	0	0	0	4.19851e-05	0	0	0	0	0	0	0	0	0	0	0	0	6.96112e-05	0	5.26732e-05	0	0	0	0	0	0	7.7815e-05	0.000190876
Archaea	Unknown KINGDOM	Euryarchaeota	Methanobacteria	Methanobacteriales	Methanothermaceae	0	0	0	0	0	0	0	0	0	0	0	4.85838e-05	0	0	0	0	0	0	0	0	0	0	0	0	0	0	0	0.00011419	0	0	5.35705e-05	0	0	0	0	0	0	0.00015797	6.08791e-05	0	0	0	0	0
Eukaryota	Unknown KINGDOM	Bacillariophyta	Bacillariophyceae	Naviculales	Phaeodactylaceae	0	0	0	0	0	0	0	0	0	0	0	0	0	0	0.000185943	0.000136631	0	0.000123335	0.00033761	0	0	0	0	0	0	0	0	0	0	4.10981e-05	0	0	0	0	0	0	0	0	0	0	3.06504e-05	0	0	0.000190876
Viruses	Unknown KINGDOM	Unknown PHYLUM	Unknown CLASS	Unknown ORDER	Adenoviridae	0	0	0	0.000116347	0	0.000136811	0	0	3.50963e-05	0.000164808	0	0	0	0	0	0	9.87362e-05	0	0	6.60851e-05	0	0	0	0	0	0	0	0	0	0	0	0	0	0	0	0	0	0	0	0	9.19512e-05	0	0	0
Eukaryota	Fungi	Basidiomycota	Agaricomycetes	Agaricales	Tricholomataceae	0	5.75374e-05	0	0	0	0	0	4.85178e-05	0	0	0	0	0	0	0	0	0	0	0	0	0	0	0	0	0	0	0	0	0	0	0	0	0	3.48056e-05	0	0	0	0	0	0	3.06504e-05	0	0	0
Bacteria	Unknown KINGDOM	Firmicutes	Erysipelotrichia	Erysipelotrichales	Erysipelotrichaceae	0	0	0	0	0	0	3.54711e-05	0	3.50963e-05	0	0	0	0	0	0	0	9.87362e-05	0	0	0	4.19851e-05	3.72884e-05	0	0.000121581	0	0	6.46245e-05	0.00011419	0	0	0.000107141	0	0	0	0	0	0	0	0	0	0	0	0	0.000190876
Archaea	Unknown KINGDOM	Euryarchaeota	Thermoplasmata	Thermoplasmatales	Picrophilaceae	0	0	0	0	4.62899e-05	0	0	0	0.000105289	0	0	0	0	0	0	0	9.87362e-05	0	0	0	4.19851e-05	0	0	0	0	0	0	3.80633e-05	0	4.10981e-05	5.35705e-05	0	3.60711e-05	3.48056e-05	0	5.26732e-05	0	0	0	3.19826e-05	0	0	0	0
Eukaryota	Metazoa	Chordata	Chondrichthyes	Torpediniformes	Narcinidae	0	0	0	0.000465387	0	0	0	0	0	0	0	0	0	0	0	0	0	0	0	0	0	0	5.71363e-05	0	0	0	0	0	0	0	0	0	0	0	0	0	0	0	0	0	0	0	0	0
Eukaryota	Fungi	Ascomycota	Sordariomycetes	Glomerellales	Glomerellaceae	0	0.000115075	0	0.000116347	0	0	0.000106413	0	3.50963e-05	0	0	0	0.000184128	6.44454e-05	0	0	0	0	0	6.60851e-05	0	0	0.000114273	0	0	0	0	0	0	0	0	5.978e-05	0	0	6.30597e-05	0	0	5.26565e-05	0	0	0	0	0	0
Bacteria	Unknown KINGDOM	Actinobacteria	Actinobacteria	Actinomycetales	Catenulisporaceae	0	0	0	0	0	0	0	0	0	0	0	0	0	0	0	0	0	0	0	0	4.19851e-05	7.45768e-05	0	0	0	0	0	0	0	0	0	0	0	0	0	0.000421385	0	0	0	0	0	5.04083e-05	0	0
Viruses	Unknown KINGDOM	Unknown PHYLUM	Unknown CLASS	Picornavirales	Picornaviridae	0	0	0	0.000116347	0	0	0	0	0	0	0	0	0.000276192	6.44454e-05	0.000185943	0	0	0	0	0	0	0	0	0	0	0	0	0	0	0	0	0	0	0	0	0	0.000269034	0	0	0	0	0	0	0.000190876
Eukaryota	Viridiplantae	Streptophyta	Unknown CLASS	Gentianales	Apocynaceae	4.75466e-05	0.000115075	0.000188513	0	4.62899e-05	4.56038e-05	3.54711e-05	9.70356e-05	3.50963e-05	0	0	0.000145751	0	6.44454e-05	0	0	0	0	0	0	0	3.72884e-05	0	0	0	0	0	0	0	0	0	0	0	6.96112e-05	0	0.000158019	0.000134517	0	0	0	0	0	0	0
Eukaryota	Viridiplantae	Streptophyta	Unknown CLASS	Lamiales	Pedaliaceae	0	0	0	0	0	0	0	0	0	0	0	0	0	0	0	0	0	0	0	0	0	0	0	0	0	0	0	0	0	0	0	0.0002989	0	0	0	0	0	0	0	0	0	0	0	0
Eukaryota	Fungi	Neocallimastigomycota	Neocallimastigomycetes	Neocallimastigales	Neocallimastigaceae	0	0.000115075	0	0.000116347	4.62899e-05	0	7.09421e-05	0	0	0	0	0	9.20641e-05	6.44454e-05	0	0	9.87362e-05	0	0	0	0	0	5.71363e-05	0	0	0	0.000129249	3.80633e-05	0	0	0	5.978e-05	3.60711e-05	0	0	0	0	0	0	0	0	0	0	0
Bacteria	Unknown KINGDOM	Firmicutes	Bacilli	Bacillales	Alicyclobacillaceae	0	0	0	0	0	0	0	0	0	0	0	0	0	0	0	0	0	0	0	0	0	0	5.71363e-05	4.05268e-05	0	0	0	0	0	0	0	0	0	0	0	0.000105346	0	0.000105313	0	3.19826e-05	0	0	0	0
Viruses	Unknown KINGDOM	Unknown PHYLUM	Unknown CLASS	Unknown ORDER	Lipothrixviridae	9.50932e-05	0	0	0	0	0	0	4.85178e-05	3.50963e-05	0	0	4.85838e-05	0	6.44454e-05	0	0	0	0	0	0	0	3.72884e-05	0	0	0	0	0	0	4.34839e-05	0	0	0	0	3.48056e-05	0	0	0	0.000263283	0	0	0	0	0	0
Eukaryota	Fungi	Glomeromycota	Glomeromycetes	Glomerales	Glomeraceae	0	0	0	0	0	0	0	0	0	0	0	0	0	0	0	0	0	0	0	0	0	0	0	0	0	0	0	0	0	0	0	0	0	0	0	0	0.000134517	0	0	0	0	0	0.000272352	0
Bacteria	Unknown KINGDOM	Proteobacteria	Deltaproteobacteria	Bdellovibrionales	Bdellovibrionaceae	0	5.75374e-05	0.000251351	0	0	9.12076e-05	0	4.85178e-05	0	0.000109872	0	9.71676e-05	0	0	0	0	0	0	0	0	0	0	5.71363e-05	0	0	0	0	0	0	0	5.35705e-05	0	0	0.000104417	0	0	0	5.26565e-05	0	0	3.06504e-05	0	0	0
Eukaryota	Viridiplantae	Streptophyta	Unknown CLASS	Caryophyllales	Amaranthaceae	0	0	0	0	0	0	7.09421e-05	0	3.50963e-05	0	0	0	0	0	0	0	0.000197472	0	0	0	0	0	0	4.05268e-05	0	0.000148024	0	0	0	0	0	0	0	0.000139222	0	0	0	0	0	0	0	5.04083e-05	0	0
Eukaryota	Viridiplantae	Streptophyta	Unknown CLASS	Caryophyllales	Aizoaceae	0	0	0	0.000116347	0	0	3.54711e-05	0	0	0.000109872	0	4.85838e-05	0.000184128	0	0	0	0	0	0	0	0	0	0.000114273	0	0	0	0	0	0	0	0	0	3.60711e-05	0	0	0	0	0	0	0	0	0	0	0
Eukaryota	Metazoa	Chordata	Mammalia	Primates	Lemuridae	0	0	0	0	0	0	0	0	0	0	0	0	0	0	0	0	0	0	0	0	0	0	0	0.000202634	0	0	0	0	0	0	0	0	0	0	0	0	0	0	0	0	0	0	0	0
Bacteria	Unknown KINGDOM	Proteobacteria	Gammaproteobacteria	Alteromonadales	Colwelliaceae	0	0	0	0	0	0	0	4.85178e-05	3.50963e-05	0.000109872	0	0	0	0	0	0	0	0	0	0	0	0	5.71363e-05	0	0	0	6.46245e-05	0	0	0	0	0	0	6.96112e-05	0	0	0	0	6.08791e-05	0	0	0	0	0
Eukaryota	Fungi	Basidiomycota	Agaricomycetes	Russulales	Russulaceae	0	0	0	0	0	0	0	0	0	0	0	0	0	0	0	0	0	0	0	0	0	3.72884e-05	0	0	0.000115549	0	0	0	0	0	0	0	7.21423e-05	3.48056e-05	0	0	0	0	6.08791e-05	9.59478e-05	0	5.04083e-05	0	0
Viruses	Unknown KINGDOM	Unknown PHYLUM	Unknown CLASS	Tymovirales	Tymoviridae	0	0.000115075	0.000125676	0	4.62899e-05	0	3.54711e-05	0	3.50963e-05	0	0.000237756	4.85838e-05	0	0	0	0	0	0	0	0	0	0	0	0	0	0	0	0	0	0	0	0	0	0	0	0	0	0	0.000121758	0	0	0	0	0
Eukaryota	Metazoa	Mollusca	Bivalvia	Mytiloida	Mytilidae	0	0	0	0	0	0	0	0	0	0	0	0	0	0	0	0	0	0	0	0	0	0	0	0	0	0	0	0	0	0	0	0	0	0	0	0	0	0	0	0	0	0	0	0
Viruses	Unknown KINGDOM	Unknown PHYLUM	Unknown CLASS	Herpesvirales	Alloherpesviridae	0	0	0.000125676	0	0	0	0	0	0	0	0	0	0	0	0	0	0	0	0.000168805	0	0	0	0	0	0	0	0	0	0	0	0	0	0	0	0	0	0	0.000105313	0	0	0	0	0	0
Viruses	Unknown KINGDOM	Unknown PHYLUM	Unknown CLASS	Nidovirales	Arteriviridae	0	0	0	0	0	0	0	0	3.50963e-05	0.000109872	0	0	0	0	0	0	0	0	0	0	0	0	0	0	0	0	0	3.80633e-05	0	4.10981e-05	0	0	0	0	0	0	0	0	0	0	0	0	3.89075e-05	0.000190876
Eukaryota	Metazoa	Arthropoda	Insecta	Lepidoptera	Bombycidae	0	0	0	0	0	0	0	0	0	0	0	0	0	0	0	0	0	0	0	0	0	0	0	0	0	0	0	0	0	0	0.000214282	0	0.000180356	0	0	0	0	0	0	0	0	0	0	0
Viruses	Unknown KINGDOM	Unknown PHYLUM	Unknown CLASS	Unknown ORDER	Corticoviridae	0	0	0.000125676	0	0	0	0	0	3.50963e-05	0	0	0	0	0	0	0	0	0	0	0	0	0	0	4.05268e-05	0	0	0	0	0	0	0	0	7.21423e-05	0	0	0	0	0	0	0	0	0	3.89075e-05	0
Viruses	Unknown KINGDOM	Unknown PHYLUM	Unknown CLASS	Herpesvirales	Malacoherpesviridae	0	5.75374e-05	0	0	4.62899e-05	0	0	9.70356e-05	3.50963e-05	0	0	0	0	0	0.000185943	0	0	0	0	0.00013217	0	0	0	0	0	0	0	3.80633e-05	0	0	0.000107141	0	0	0	0	0	0	0	0	3.19826e-05	0	0	0	0
Eukaryota	Metazoa	Arthropoda	Insecta	Coleoptera	Tenebrionidae	4.75466e-05	0	0	0	0	0	0	4.85178e-05	3.50963e-05	0	0	4.85838e-05	9.20641e-05	0	0	0	0	0	0	0	0	0	0	0	0	0	0	0	0	0	0	5.978e-05	0	0	0	0	0	0	0	3.19826e-05	3.06504e-05	0	0	0
Eukaryota	Metazoa	Chordata	Mammalia	Diprotodontia	Phalangeridae	0	0	0	0	0	0	0	0	0	0	0	0	0	0	0	0	0	0	0	0	0	0	0	0	0	0	0	0	0	0	0	0	0	0	0	0	0	0	0	0	0	0	0	0
Viruses	Unknown KINGDOM	Unknown PHYLUM	Unknown CLASS	Unknown ORDER	Inoviridae	0	0	0	0	0	0	0	0	0	5.4936e-05	0	0	0	0	0	0	0	0	0	0	0	0	5.71363e-05	8.10537e-05	7.70327e-05	0	6.46245e-05	0	0	0	5.35705e-05	0	0	0	0	0	0	5.26565e-05	0	6.39652e-05	0	0	0	0
Eukaryota	Metazoa	Platyhelminthes	Trematoda	Strigeidida	Schistosomatidae	9.50932e-05	0	0	0	0	0	0	0	0	0	0	0	0	0	0	0	0	0	0	0.00026434	0	0	0	0	0	0	0	0	0	0	0	0	0	0	0	0	0	0	0	0	0	0	7.7815e-05	0
Viruses	Unknown KINGDOM	Unknown PHYLUM	Unknown CLASS	Unknown ORDER	Caulimoviridae	9.50932e-05	0	0	0	4.62899e-05	0	0	0	0	0	0	0	0	0	0	0	0	0	0	0	8.39701e-05	0	0	8.10537e-05	0	0	0	0	4.34839e-05	0	5.35705e-05	0	3.60711e-05	0	0	0	0.000134517	0	0	6.39652e-05	0	0	0	0
Eukaryota	Viridiplantae	Streptophyta	Unknown CLASS	Caryophyllales	Nepenthaceae	0	0	0	0	0	0	3.54711e-05	0	3.50963e-05	0	0	0	0	0	0	0	9.87362e-05	0	0	0	0	3.72884e-05	0	8.10537e-05	0	0	0	7.61267e-05	0	0	5.35705e-05	0	0	0	0	0	0	0	0	0	0	0	0	0
Bacteria	Unknown KINGDOM	Actinobacteria	Actinobacteria	Actinomycetales	Sanguibacteraceae	0	5.75374e-05	0	0	0	0	0	0	3.50963e-05	5.4936e-05	0	0	0	0	0	0	9.87362e-05	0	0	0	0	0	0	0	0	0	6.46245e-05	0	0	0	0	0	0	0	0	0	0	5.26565e-05	0	0	0	0	0	0
Bacteria	Unknown KINGDOM	Proteobacteria	Epsilonproteobacteria	Nautiliales	Nautiliaceae	9.50932e-05	0	0.000188513	0	0	0	0	0	0	5.4936e-05	0	4.85838e-05	0	0	0.000185943	0	0	0	0	6.60851e-05	0	0	0	0	0	0	0	0	0	0	0	0	0	0	0	0	0	0	0	0	0	0	0	0
Bacteria	Unknown KINGDOM	Proteobacteria	Alphaproteobacteria	Rhodobacterales	Hyphomonadaceae	0	0	0	0	0	0	0	0	0	0	0	0	0	0	0	0	0	0	0	0	0	0	0	0	0	0	0	0	0	0	0	0	0	0	0	0	0	0	0	0	0	0	7.7815e-05	0
Eukaryota	Fungi	Ascomycota	Sordariomycetes	Hypocreales	Hypocreaceae	0	0	0.000188513	0	0	0	0	0	0	0	0	0	0	0	0	0	0	0	0	0	0	0	0	0	0	0	0	3.80633e-05	0	0	0	0	0	0	0	0	0	0.00015797	0	0	0	0	0	0
Eukaryota	Fungi	Basidiomycota	Agaricomycetes	Agaricales	Schizophyllaceae	0	0	0	0	0	0	0	0	0	0	0	0	0	0	0	0	0	0	0	0	0	3.72884e-05	0	0	3.85164e-05	0	0	0	0	0	0	0	0	0	6.30597e-05	0	0	5.26565e-05	0	0	0	0	7.7815e-05	0
Eukaryota	Fungi	Ascomycota	Sordariomycetes	Hypocreales	Cordycipitaceae	0	0	0	0	0	0	0	0	0	0	0	0	0	0	0	0	0	0	0	0	0	0	0	0	3.85164e-05	0	6.46245e-05	0	4.34839e-05	0	0.000107141	0	3.60711e-05	0	0	0	0	5.26565e-05	0	3.19826e-05	0	0	0	0
Viruses	Unknown KINGDOM	Unknown PHYLUM	Unknown CLASS	Unknown ORDER	Cystoviridae	0	5.75374e-05	6.28378e-05	0	0	4.56038e-05	0	4.85178e-05	3.50963e-05	0	0	0	0	0	0	0	0	0	0	0	0	0	0	0	0	4.93413e-05	0	0	0	0	0	0	0	0	0	0	0	0	0	0.000159913	0	0	3.89075e-05	0
Viruses	Unknown KINGDOM	Unknown PHYLUM	Unknown CLASS	Tymovirales	Betaflexiviridae	0	0	6.28378e-05	0	0	0	0	4.85178e-05	0	0	0	4.85838e-05	0	0	0	0	0	0.000123335	0.000168805	0	0	0	0	0	0	0	0	0	0	0	0.000160711	0	0	0	0	0	0	0	6.08791e-05	0	0	0	0	0
Eukaryota	Metazoa	Mollusca	Bivalvia	Pectinoida	Pectinidae	0	0	0	0	0	0	0	0	0	0	0	0	0	0	0	0	0	0	0	0	4.19851e-05	0	0	0	0	0	0	7.61267e-05	0	0	0	0	0	0	0	5.26732e-05	0	0	0	0	0	0	0	0
Eukaryota	Viridiplantae	Streptophyta	Liliopsida	Asparagales	Asparagaceae	0	0	0	0	0	0	0	0	0	0	0.000118878	0	0	0	0	0	0	0	0	0	0	0	0	8.10537e-05	0	0	0	0	0	0	5.35705e-05	0	0	0	0	0	0	5.26565e-05	0	0	0	0	0	0
Bacteria	Unknown KINGDOM	Spirochaetes	Spirochaetia	Spirochaetales	Brachyspiraceae	0	5.75374e-05	0	0	0	0	0	0	0	0	0	0	0	0	0	0	0	0	0	0	4.19851e-05	0	0	8.10537e-05	3.85164e-05	0	0	3.80633e-05	0	0	0	0	0	0	0	5.26732e-05	0	0	0	0	0	0	0	0
Bacteria	Unknown KINGDOM	Actinobacteria	Actinobacteria	Actinomycetales	Cellulomonadaceae	0	5.75374e-05	0	0	0	0	0	0	0	0	0.000237756	0	0	0	0	0	0	0	0	0	0	0	0	0	3.85164e-05	0	0	3.80633e-05	4.34839e-05	4.10981e-05	0	0	0	0	0	0	0	0	0	0	0	0	0	0
Eukaryota	Viridiplantae	Streptophyta	Unknown CLASS	Asterales	Campanulaceae	0	0	0	0.000116347	0	0	0	0	0	0	0	0	0.000184128	0	0	0	0	0	0	0	0	0	0	0	0	0	0	0	0	0	0	0	0	0	0	0	0	0	0	0	0	0	0	0.000190876
Archaea	Unknown KINGDOM	Euryarchaeota	Methanomicrobia	Methanomicrobiales	Methanocorpusculaceae	0	5.75374e-05	0	0	0	4.56038e-05	0	4.85178e-05	0	0	0.000237756	4.85838e-05	0	0	0	0	0	0	0	0	0	0	5.71363e-05	0	0	0	0	0	0	0	0	0	0	0	0	0	0	0	0	0	0	0	3.89075e-05	0
Eukaryota	Viridiplantae	Streptophyta	Unknown CLASS	Rosales	Elaeagnaceae	0	0	0	0	0.00013887	0	3.54711e-05	0	3.50963e-05	0	0	0	0	0	0	0	0	0	0	0	0	0	0	0	0	4.93413e-05	0	0	0	8.21963e-05	0	0	0	0	0	0	0	0	0	0	0	0	0	0
Eukaryota	Unknown KINGDOM	Bacillariophyta	Coscinodiscophyceae	Unknown ORDER	Thalassiosiraceae	0	0	0	0	0	0	7.09421e-05	0	0	0	0	0	0	0	0	0	0	0	0	0	0	0	0	0	0	0	0	0.00022838	0	0	0	0	0	3.48056e-05	0	0	0	0	0	0	0	0	7.7815e-05	0
Viruses	Unknown KINGDOM	Unknown PHYLUM	Unknown CLASS	Unknown ORDER	Totiviridae	0	0	0	0	0	0	0	0	0	0	0.000237756	0	0	0	0	0	0	0	0	0	0	0	0	4.05268e-05	0	0	0	0	0	4.10981e-05	5.35705e-05	0	0	0.000104417	0	0	0	0	0	0	0	0	0	0
Viruses	Unknown KINGDOM	Unknown PHYLUM	Unknown CLASS	Unknown ORDER	Parvoviridae	0	0	0	0	0	0	0	0	0	0	0	0	0	0	0	0	0	0	0	0	0	0	0	0	0	0	0	0	0	0	0	0	0	0	0	0	0	0	6.08791e-05	0	0	0	0	0
Viruses	Unknown KINGDOM	Unknown PHYLUM	Unknown CLASS	Tymovirales	Alphaflexiviridae	0	0	0	0	0	0	0	0	0	0	0.000118878	0	0	0	0	0	0	0	0	0	0	0	0	0	0	0	0	0	4.34839e-05	0	0.000214282	0	0	0	0	0	0	0	0	0	0	0	0	0
Viruses	Unknown KINGDOM	Unknown PHYLUM	Unknown CLASS	Unknown ORDER	Geminiviridae	0	0	0	0.000232693	0	0	0	0	0	0	0	0	9.20641e-05	0	0	0	9.87362e-05	0	0	0	0	0	0	0	0	0	0	0	0	0	0	0	0	0	6.30597e-05	0	0	0	0	0	0	0	0	0
Eukaryota	Viridiplantae	Streptophyta	Unknown CLASS	Nymphaeales	Nymphaeaceae	0	0	0	0	0	0	0	0	0	0	0	0	0	6.44454e-05	0	0	0	0	0	0	0	0	0	4.05268e-05	0	0	0	0	4.34839e-05	0	0	5.978e-05	0	0	0	0	0	0	0	0	0	0	3.89075e-05	0
Eukaryota	Metazoa	Mollusca	Gastropoda	Unknown ORDER	Lymnaeidae	0	0	0	0	0	0	7.09421e-05	0	0	0	0	0	0	0	0	0	0	0	0	0	0	0	0	0	0	0	0	0	0	8.21963e-05	0	0	0	0	0	0	0	0	0	0	0	0	0	0
Eukaryota	Metazoa	Chordata	Amphibia	Anura	Bufonidae	0	0.000115075	0	0	0	0	0	0	3.50963e-05	0	0.000118878	4.85838e-05	0	0	0	0	0	0	0	6.60851e-05	0	0	0	0	0	0	0	0	0	0	0	0	0	0	0	0	0	0	6.08791e-05	0	0	0	3.89075e-05	0
Eukaryota	Fungi	Ascomycota	Eurotiomycetes	Onygenales	Ajellomycetaceae	0	0	0	0	0	0	0	0	3.50963e-05	0	0	0	0	0	0	0	0	0	0	0	0	0	0	0	0	4.93413e-05	0	0	8.69679e-05	0	0	0	0	3.48056e-05	0	0	0	0	0	0	0	0	0	0
Eukaryota	Metazoa	Nematoda	Chromadorea	Rhabditida	Trichostrongylidae	0	0	0	0	0	0	0	0	0	0	0	0	0	0	0	0	0	0	0	0	0	0	0	0	0	0	0	0	0	0	0	0	0	0	0.000252239	0	0	0	0	0	0	0	0	0
Eukaryota	Metazoa	Chordata	Mammalia	Perissodactyla	Tapiridae	0	0	0	0	0	0	0	0	0	0	0	0	0	0	0	0	0	0	0	0	0	0	0	0	0	4.93413e-05	0.000323123	0	0	0	0	0	0	0	0	0	0	0	0	0	0	0	0	0
Eukaryota	Metazoa	Chordata	Unknown CLASS	Squamata	Tropidophiidae	0	0	6.28378e-05	0	4.62899e-05	0	0	0	0	0.000109872	0	4.85838e-05	0	0	0	0	0	0	0	0	0	0	0	0	0	0	0	0	0	0	0	0	0	0	0	0	0	0	0	0	0	5.04083e-05	0	0
Bacteria	Unknown KINGDOM	Bacteroidetes	Sphingobacteriia	Sphingobacteriales	Sphingobacteriaceae	0	0	0	0	0.00013887	0	0	0	0	5.4936e-05	0	0	0	0	0	0	0	0	0	0	4.19851e-05	0	0	0	0	0	0	0	0	0	0	0	0	0	6.30597e-05	0	0	0	0	0	0	0	0	0
Eukaryota	Metazoa	Cnidaria	Anthozoa	Actiniaria	Edwardsiidae	0	0	0	0	0	4.56038e-05	0	0	0	0	0	0	0	0	0	0	0	0	0	6.60851e-05	0	0	0	0	0	0	0	0	0	0	0	0	0	0	0	0	0	0	0	0	6.13008e-05	0	0	0
Eukaryota	Unknown KINGDOM	Apicomplexa	Coccidia	Eucoccidiorida	Sarcocystidae	0	5.75374e-05	0	0	0	0	0	4.85178e-05	0	0	0	4.85838e-05	0	0	0	0	0	0	0	0	0	0	0	0	0	0	0	3.80633e-05	0	0	0	0	0	0	0	0	0	0	0	3.19826e-05	6.13008e-05	0	0	0
Eukaryota	Viridiplantae	Streptophyta	Unknown CLASS	Canellales	Winteraceae	0	0.000115075	0	0	0	9.12076e-05	0	0	7.01927e-05	0	0	0	9.20641e-05	0	0	0	0.000197472	0	0	0	0	0	0	0	0	0	0	0	0	0	0	0	0	0	0	0	0	0	0	0	0	0	0	0
Eukaryota	Unknown KINGDOM	Unknown PHYLUM	Unknown CLASS	Isochrysidales	Noelaerhabdaceae	0	5.75374e-05	0	0	0	0	0	0	0	0	0	4.85838e-05	0	0	0.000185943	0	0	0	0	0	0	3.72884e-05	0	0	0	9.86826e-05	0	0	0	0	0	0	0	0	0	0	0	0	0	0	0	0	0	0
Eukaryota	Metazoa	Arthropoda	Malacostraca	Decapoda	Cambaridae	0	0	0	0	0	0	0	0	0	0	0	0	0	0	0	0	0	0	0	0	0	0	0	0	0	0	0	0	4.34839e-05	0	0	0	0	0	0	0	0	0	0	0	0	0	0	0
Bacteria	Unknown KINGDOM	Tenericutes	Mollicutes	Entomoplasmatales	Spiroplasmataceae	0.000190186	0.000115075	0	0	0	0	3.54711e-05	0	0	0	0	0	0	6.44454e-05	0	0	0	0	0	0	0	0	0	0	7.70327e-05	0	0	0	0	0	0	0	0	0	0	0	0	0	0	0	0	0	0	0
Eukaryota	Viridiplantae	Streptophyta	Unknown CLASS	Ericales	Sapotaceae	0	0	0	0	0	0	0	0	0	0	0	0	0	0	0	0	0	0	0	0	0	0	0	0	0	0	0	0	0	0	0	0	0	0	0	0.000526732	0	0	0	0	0	0	0	0
Eukaryota	Metazoa	Chordata	Mammalia	Primates	Cebidae	0	0	0	0	0	0	0	0	0	0	0	0	0	0	0	0	0	0	0.000168805	0	0	0	0	0	0	0	0	0	0	0	0	0	0	0	0	0	0	0	0	0	0	0	7.7815e-05	0
Bacteria	Unknown KINGDOM	Chloroflexi	Chloroflexi	Herpetosiphonales	Herpetosiphonaceae	4.75466e-05	0	0	0	0	0	0	0	0	0	0	0	0	0	0	0	0	0	0	0	4.19851e-05	0	0	0	0	0	0	0	0	0	0.000160711	0	0	0	0	0	0	0	0	0	0	0	3.89075e-05	0
Eukaryota	Fungi	Unknown PHYLUM	Unknown CLASS	Mucorales	Mucoraceae	0	0	0	0	0	0	3.54711e-05	0	3.50963e-05	0	0	0	0	0	0	0	0	0	0	0.00013217	0	0	0	0.000162107	0	0	0	0	0	0	0.000107141	0	0	0	0	0	0	0	0	0	0	0	0	0
Eukaryota	Unknown KINGDOM	Unknown PHYLUM	Spirotrichea	Sporadotrichida	Oxytrichidae	0	0	0	0	0	0	0	0	0	0	0	0	0	0	0	0	0	0	0	0	0	0	0	0	0	0	0	0	0	0	0	0	0	0	0	0	0	0	0	0	0	0	0	0
Bacteria	Unknown KINGDOM	Cyanobacteria	Unknown CLASS	Prochlorales	Prochlorotrichaceae	0	0	0	0	0	0	0	0	0	0	0	0	0	0	0	0	0	0	0	0	0	0	0	4.05268e-05	0	0	0	0	0	0	0	0	0	0	0	0	0	0	0	0	0	0	0	0
Eukaryota	Metazoa	Chordata	Mammalia	Carnivora	Felidae	0	0	0	0	4.62899e-05	0	0	0	0	5.4936e-05	0	0	0	0	0.000185943	0	0	0	0.000168805	0	0	0	0	0	0	0	0	0	4.34839e-05	0	0	0	0	0	0	0	0	0	0	0	0	0	0	0
Eukaryota	Metazoa	Arthropoda	Insecta	Coleoptera	Carabidae	0	0	0	0	0	0	0	0	0	0	0	0	0	0	0	0	0	0	0	0	0	0	5.71363e-05	0	0	0	0	0	0	0	0	0	0	0	0	5.26732e-05	0	0	0	0	0	0	0	0
Eukaryota	Metazoa	Chordata	Actinopterygii	Anguilliformes	Anguillidae	0	0	0	0	0	0	0	0	0	0	0	0	0	0.000193336	0	0	0	0	0	0	0	0	0	0	0	0	0	0	0	0	0	0.00011956	0	0	0	0	0	0	0.000121758	0	0	0	0	0
Eukaryota	Metazoa	Chordata	Mammalia	Cetacea	Delphinidae	0	0	0	0	0	0	0	0	0	0	0	0	0	0	0	0	0	0	0	0	0	0	0	0	0	0	0	0	0	0	0	0	0	0	0	0	0	0	0	0	0	0	0	0
Eukaryota	Metazoa	Arthropoda	Arachnida	Scorpiones	Buthidae	0	0	0	0	0	0	0	0	0	0	0	0	0	0	0	0	0	0	0	0	0	0	0	0	0	9.86826e-05	0	0	0.000347871	0	0	0	0	0	0	0	0	0	0	0	0	0	0	0
Eukaryota	Viridiplantae	Streptophyta	Liliopsida	Poales	Bromeliaceae	0	0	0	0	0	0	0	0	0	0	0	0	0	0	0	0	0	0	0	0	0	0	0	0	0	0	0	0	0	0	0	0	0	0	0	0	0	0	0	0	0	0	0	0
Eukaryota	Fungi	Microsporidia	Unknown CLASS	Unknown ORDER	Nosematidae	0	0	0	0	0	0	0	0	0	0	0	4.85838e-05	0	0	0	0	0	0	0	0	0	0	0	0	0	9.86826e-05	0	0	0	0	0	0	0	0	0	0	0	0	0	0	0	0	0	0
Eukaryota	Unknown KINGDOM	Unknown PHYLUM	Unknown CLASS	Choanoflagellida	Codonosigidae	0	0	0	0	0	0	0	0	0	0	0	0	0	0	0	0	0	0	0	0	0	0	5.71363e-05	0	0	0	6.46245e-05	0	0	0	0	0	0	0	0	0	0	0	0	0	3.06504e-05	0	0	0
Viruses	Unknown KINGDOM	Unknown PHYLUM	Unknown CLASS	Mononegavirales	Filoviridae	0	0	0	0	0	0	0	0	0	0	0	0	0	0	0	0	0	0	0	0	0	0	0	0	0	0	0	0	0	0	0	0	0	0	0	0	0	0	0	0	0	0	0	0
Eukaryota	Metazoa	Chordata	Mammalia	Insectivora	Soricidae	0	0	0	0	0	0	0	0	0	0	0	0	0	0	0	0	0	0	0	0	0	3.72884e-05	0	0	0	0	0	0	0	0	0	0	0	3.48056e-05	0	0	0	5.26565e-05	0	0	0	0	0	0
Eukaryota	Metazoa	Chordata	Actinopterygii	Cyprinodontiformes	Fundulidae	0	0	0	0	0	9.12076e-05	0	0	0	5.4936e-05	0	0	0	0	0	0	0	0	0	0	0	0	0	4.05268e-05	0	0	0	0	0	0	0	0	0	0	0	0	0	0.00015797	0	0	0	0	0	0
Eukaryota	Viridiplantae	Streptophyta	Coniferopsida	Coniferales	Cupressaceae	0	0	6.28378e-05	0	9.25797e-05	4.56038e-05	0	0	0	0	0	0	0	0	0	0	0	0	0	0	0	0	0	0	0	4.93413e-05	0	0	0	0	0	0	0	0	0	0	0	0	0	0	0	5.04083e-05	0	0
Eukaryota	Metazoa	Nematoda	Chromadorea	Ascaridida	Anisakidae	0	0	0	0	0	0	0	4.85178e-05	0	0	0	4.85838e-05	0	6.44454e-05	0	0	0	0	0	0	0	0	0	0	0	0	0	0	0	0	0	0	0	0	0	0	0	5.26565e-05	0	0	0	5.04083e-05	0	0
Eukaryota	Metazoa	Echinodermata	Asteroidea	Forcipulatida	Asteriidae	0	0	0.000125676	0	0	4.56038e-05	0	4.85178e-05	0	0.000109872	0	0	0	0	0	0	0	0	0	0	0	0	0	0	0	0	0	0	0	0	0	0	0	0	0	0	0	0	0	0	0	0	0	0
Bacteria	Unknown KINGDOM	Planctomycetes	Planctomycetia	Candidatus Brocadiales	Candidatus Brocadiaceae	0	0	0	0	0	0	3.54711e-05	0	3.50963e-05	0	0	0	0	0	0	0	0	0	0	0	0	0	0	0	0	0	0	3.80633e-05	0	0	5.35705e-05	0	0	0	0	0	0	0	0	0	0	0	0	0
Archaea	Unknown KINGDOM	Crenarchaeota	Thermoprotei	Thermoproteales	Thermofilaceae	0	0	0	0	0	0	0	0	0	0	0	0	0	0	0	0	0	0	0	0	0	3.72884e-05	0	0	0	0	0	3.80633e-05	4.34839e-05	0	0	0	0	0	0	0	0	0	0	0	0	0	0	0.000190876
Eukaryota	Metazoa	Mollusca	Gastropoda	Unknown ORDER	Conidae	0	0	0	0	0	0	0	0	0	0	0	0	0	0	0	0	0	0	0	0	0	0	0	0	0	0	0	0	0	0	0	0.00011956	0	0	0	0	0.000134517	0	0	0	0	0	0	0
Eukaryota	Viridiplantae	Streptophyta	Unknown CLASS	Amborellales	Amborellaceae	0	0	0	0	0	0	0	0	0	0	0	0	0	0	0	0	0	0	0	0	0	0	0	0	0	0	0	7.61267e-05	0	0	0	0	0	0	0	0	0	0	0	0	3.06504e-05	0	0	0
Viruses	Unknown KINGDOM	Unknown PHYLUM	Unknown CLASS	Unknown ORDER	Birnaviridae	0	0	0	0	0	0	0	0	0	0	0	0	0	0	0	0	0	0	0	0	0	0	0	0	0	0	0	0	0	0	0.000321423	0	0	0	0	0	0	0	0	3.19826e-05	0	0	0	0
Bacteria	Unknown KINGDOM	Firmicutes	Bacilli	Bacillales	Planococcaceae	0	5.75374e-05	0	0	0	0	0	0	7.01927e-05	0	0	0	0	0	0	0	0	0	0	0	0	0	0	0	0	0	0	0	0	0	0	0.00011956	0	3.48056e-05	0	0	0	0	0	0	0	0	0	0
Eukaryota	Viridiplantae	Streptophyta	Unknown CLASS	Geraniales	Geraniaceae	0	0	0	0	0	0	0	0	0	0	0	0	0	0	0	0	0	0	0	0	0	0	0	0	0	0	0	0	0	0	0	0	0	0	0	0	0	0	0	0	0	0	0	0
Eukaryota	Viridiplantae	Streptophyta	Unknown CLASS	Apiales	Apiaceae	0	0	0	0	0	0	0	0	0	0	0	0	0	0	0	0	0	0	0	0	0	0	0	0	0	0	0	0	0	0	0	0	3.60711e-05	0	0	0	0	0	0	0	0	0	0	0
Bacteria	Unknown KINGDOM	Proteobacteria	Alphaproteobacteria	Magnetococcales	Magnetococcaceae	4.75466e-05	0	0	0	4.62899e-05	0	0	0	0	0	0	0	0	0	0	0	0	0	0	0	0	0	0	0	0	0	0	0	0	0	0	0	0	0	0	0	0	0	0	0	0	0	0	0
Viruses	Unknown KINGDOM	Unknown PHYLUM	Unknown CLASS	Unknown ORDER	Polydnaviridae	0	0	0	0.000116347	0	0	0	0	0	0	0	0	9.20641e-05	0	0	0	0	0	0	0	0	0	5.71363e-05	0	0	0	0	0	0	0	0	0	0	0	0	0	0	0	0	0	0	0	0	0
Eukaryota	Metazoa	Chordata	Aves	Cuculiformes	Cuculidae	0	0	0	0	0	0	0	0	0	0	0	0	0	0	0	0	0	0	0	0	0	0	0	0.000121581	0	0	0	0	0	0	0	0	0	0	0	0	0	0	0	0	0	0	0	0
Eukaryota	Metazoa	Chordata	Mammalia	Primates	Hylobatidae	0	0	0	0	0	0	0	0	0	0	0	0	0	0	0	0.000136631	0	0	0	0	0	0	0	0	0	0	0	0	0	0	0	0	0	0	0	0	0.000134517	0	0	0	0	0	0	0
Eukaryota	Unknown KINGDOM	Euglenida	Unknown CLASS	Euglenales	Euglenaceae	0	0	0	0	0	0	0	0	0	0	0	0	0	0	0	0	0	0	0	0	0	0	0	0	0	0	0	0	0	0	0	0	0	0	6.30597e-05	0	0	0	0	0	0	0	0	0
Eukaryota	Metazoa	Chordata	Amphibia	Anura	Ranidae	0	5.75374e-05	0	0	4.62899e-05	0	0	0	0	0	0	0	0	0	0	0	0	0	0	0	0	0	0	0	0	0	0	0	0	0	0	0	0	0	0	0	0	0	0	0	0	0	0	0
Eukaryota	Metazoa	Platyhelminthes	Cestoda	Cyclophyllidea	Taeniidae	0	0	0	0	0	0	0	0	0	0	0	0	0	0	0	0	0	0	0.000168805	0	0	0	0	0	0	0	0	0	0	0	0	0	0	3.48056e-05	0	0	0	0	0	0	0	0	0	0
Viruses	Unknown KINGDOM	Unknown PHYLUM	Unknown CLASS	Nidovirales	Coronaviridae	0	0	0	0	4.62899e-05	0	0	0	0	0	0	0	0	0	0	0	0	0	0	0	0	0	0	0	0	4.93413e-05	0	0	0	0	0	0	0	0	0	0	0.000134517	0	0	0	0	0	0	0
Eukaryota	Fungi	Basidiomycota	Agaricomycetes	Agaricales	Agaricaceae	0	0	0	0	0	0	0	0	0	0	0	0	0	0	0	0	0	0	0	0	0	0	0	0	0	0	0.000258498	0	0	0	0	0	0	0	0	0	0	0	0	0	0	0	0	0
Eukaryota	Viridiplantae	Chlorophyta	Trebouxiophyceae	Unknown ORDER	Botryococcaceae	0	0	0	0	0	0	0	0	0	0	0.000118878	0	0	0	0	0	0	0	0	6.60851e-05	0	0	0	0	0	0	0	0	0	0	0	0	0	0	0	0	0	0	0	0	0	0	0	0
Eukaryota	Viridiplantae	Streptophyta	Unknown CLASS	Malvales	Cistaceae	0	0	0	0	0	0	0	0	0	0	0	0	0	0	0	0	0	0	0	0	0	0	0	0	0	0	0	0	0	0	0	0	0	0	0	0	0	0	0	0	0	0	0	0
Viruses	Unknown KINGDOM	Unknown PHYLUM	Unknown CLASS	Picornavirales	Iflaviridae	0	0	0	0	0	0	0	0	0	0	0	0	9.20641e-05	0	0	0	0	0	0	0	0	0	0	0	0	0	0	3.80633e-05	0	0	0	0	0	0	0	0	0	0	0	0	0	0	0	0
Eukaryota	Metazoa	Chordata	Mammalia	Scandentia	Tupaiidae	0	0	0	0	0	4.56038e-05	0	0	3.50963e-05	0	0	0	0	0	0	0	0	0	0	0	0	0	0	0	0	0	0	0	0	0	0	5.978e-05	3.60711e-05	0	0	0	0	0	0	0	0	0	0	0
Eukaryota	Viridiplantae	Streptophyta	Coniferopsida	Coniferales	Taxaceae	0	0	0	0	0	0	0	0	0	0	0	0	0	0	0	0	0	0	0	0	0	0	0	0	0	0	0	0	0	0	0	0	0	0	0	0	0.000134517	0	0	0	0	0	0	0
Bacteria	Unknown KINGDOM	Proteobacteria	Alphaproteobacteria	Rhizobiales	Beijerinckiaceae	0	0	0	0	0	0	0	0	0	0	0	0	0	0	0	0	0	0	0	0	0	0	0	0	7.70327e-05	0	0	0	4.34839e-05	8.21963e-05	0	0	0	0	0	0	0	0	0	0	0	0	0	0
Eukaryota	Viridiplantae	Streptophyta	Jungermanniopsida	Metzgeriales	Aneuraceae	0	0	0	0	0	0	0	0	0	0	0	0	0	0	0	0	0	0	0	0	0	0	0	0	0	0	0	0	0	0	0	0	0	0	0	0	0	0	0	0	0	0	3.89075e-05	0
Eukaryota	Metazoa	Nematoda	Chromadorea	Spirurida	Onchocercidae	0	0	0.000125676	0	0	0	0	0	0	0	0	0	0	0	0	0	0	0	0	0	0	0	0	0	0	0	0	0	0	0	0	0	0	0	0	0	0	0	0	0	0	0	0.000116722	0
Eukaryota	Metazoa	Cnidaria	Hydrozoa	Hydroida	Hydridae	0	5.75374e-05	0	0	0	0	0	0	0	0	0	0	0	0	0	0	9.87362e-05	0	0	0	0	0	0	0	0	0	0	0	0	0	0	0	0	3.48056e-05	0	0	0	0	0	0	0	0	0	0
Eukaryota	Viridiplantae	Streptophyta	Unknown CLASS	Cucurbitales	Cucurbitaceae	0	0	0	0	0	0	0	0	0	0	0	0	0	6.44454e-05	0	0	0	0	0	0	0	0	0	0	0	0	0	0	0	0	0	0	0	0	6.30597e-05	0	0	0	0	0	0	0	0	0
Eukaryota	Viridiplantae	Streptophyta	Unknown CLASS	Apiales	Araliaceae	0	0	0	0	4.62899e-05	0	0	0	0	0	0	0	0	0	0	0.000136631	0	0	0	0	0	0	0	0	0	0	0	0	0	0	0	0	0	0	0	0	0	0	0	0	0	0	0	0
Eukaryota	Fungi	Ascomycota	Saccharomycetes	Saccharomycetales	Phaffomycetaceae	0	0	0	0	0	0	0	0	0	0	0	0	0	0	0	0	0	0	0	0.00013217	0	0	0	4.05268e-05	0	0	0	0	0	0	5.35705e-05	0	0	0	0	0	0	0	0	0	0	0	0	0
Eukaryota	Viridiplantae	Streptophyta	Unknown CLASS	Malpighiales	Linaceae	0	0	6.28378e-05	0	0	0	0	0	0	0	0	0	0	0	0	0	0	0	0	0	0	0	0	0	0	0	0	0	0	0	0	0	0	0	0	0	0	0.00015797	0	0	0	0	0	0
Eukaryota	Viridiplantae	Streptophyta	Unknown CLASS	Rosales	Cannabaceae	0	0	0	0	0	0	0	0	0	0	0	0	0	0	0	0	0	0	0	0	0	0	0	0	0	0	0	0	0	0	0	0	0	3.48056e-05	0	0	0	0	0	0	0	0	0	0
Viruses	Unknown KINGDOM	Unknown PHYLUM	Unknown CLASS	Unknown ORDER	Barnaviridae	0	0	0	0	0	0	0	0	0	0	0	0	0	0	0	0	0	0	0	0	0	0	0	0	0	0	0	3.80633e-05	0	0	0	0	0	0	0	0	0	0	0	0	0	0	0	0
Eukaryota	Viridiplantae	Streptophyta	Marattiopsida	Marattiales	Marattiaceae	0	0	0	0	0	0	0	0	0	0	0	0	0	0	0	0	0	0	0	0	0	0	5.71363e-05	0	0	0	0	0	0	0	0	0	0	0	0	0.000105346	0	0	0	0	0	0	0	0
Eukaryota	Metazoa	Chordata	Aves	Columbiformes	Columbidae	0	0	0	0	0	0	0	0	0	0	0	0	0	0	0	0	0	0	0	6.60851e-05	0	0	0	0	0	0	0	0	0	0	0	0	3.60711e-05	0	0	0	0	5.26565e-05	0	0	0	0	0	0
Eukaryota	Viridiplantae	Streptophyta	Marchantiopsida	Marchantiales	Marchantiaceae	0	0	0	0	0	0	0	0	0	0	0	0	0	0	0	0	0	0	0	0	0	0	0	0	0	0	0	0	0	0	0	0	0	0	0	0	0	0	0	0	0	0	0	0
Eukaryota	Fungi	Ascomycota	Leotiomycetes	Helotiales	Sclerotiniaceae	0	0	0	0	0	0	0	0	0	0	0	0	0	0	0	0	0	0	0	0	0	0	5.71363e-05	0	0	0	0	0	0	0	0	0	0	0	0	0	0	5.26565e-05	0	0	0	0	0	0
Bacteria	Unknown KINGDOM	Cyanobacteria	Unknown CLASS	Nostocales	Microchaetaceae	0	0	0	0	4.62899e-05	0	0	0	0	0	0	0	0	0	0	0	0	0	0	0	0	0	0	0	0	0	0	0	0	0	0	0	0	0	0	0	0	0	0	3.19826e-05	0	0	0	0
Bacteria	Unknown KINGDOM	Firmicutes	Clostridia	Thermoanaerobacterales	Thermodesulfobiaceae	0	0	0	0	0	0	0	0	0	0	0	0	0	0	0	0	0	0	0	0	4.19851e-05	0	0	0	0	0	0	0	0	0	5.35705e-05	0	0	0	0	0	0	0	0	0	0	5.04083e-05	0	0
Viruses	Unknown KINGDOM	Unknown PHYLUM	Unknown CLASS	Unknown ORDER	Papillomaviridae	9.50932e-05	0	0	0	0	0	0	0	0	0	0	0	0	0	0	0	0	0	0	0	0	0	0	0	0	4.93413e-05	0	0	0	0	0	0	0	0	0	0	0	0	0	3.19826e-05	0	0	0	0
Bacteria	Unknown KINGDOM	Actinobacteria	Actinobacteria	Actinomycetales	Nakamurellaceae	0	5.75374e-05	0	0	0	0	0	0	0	0	0	0	0	6.44454e-05	0	0	0	0	0	0	0	0	0	0	0	0	0	0	0	0	0	0	0	0	0	0	0	0	0	0	0	0	0	0
Eukaryota	Fungi	Ascomycota	Pezizomycetes	Pezizales	Tuberaceae	4.75466e-05	0	0	0	0	0	3.54711e-05	0	0	0	0	0	0	0	0	0	0	0	0	0	0	0	0	0	0	0	0	0	0	0	0	0	0	0	0	0	0	5.26565e-05	0	0	0	0	3.89075e-05	0
Eukaryota	Metazoa	Chordata	Actinopterygii	Siluriformes	Clariidae	0	0	0	0	0	0	0	0	0	0	0	0	0	0	0	0	0	0	0	0	0	0	0	0	0	0	0	0	0	0	0	0	0	0	0	0	0	0	0	0	0	0	0	0
Eukaryota	Viridiplantae	Streptophyta	Unknown CLASS	Austrobaileyales	Schisandraceae	0	0	0	0	0	0	0	0	0	0	0	0	0	0	0	0	0	0	0	0	0	0	0	0	0	0	0	0	0	0	0	0	0	0	0	0	0	0	0	0	0	0	0	0
Eukaryota	Metazoa	Echinodermata	Echinoidea	Cassiduloida	Echinolampadidae	0	0	0	0	0	0	0	0	0	0	0	0	0	0	0	0	0	0	0	0	0	0	5.71363e-05	0	0	0	0	0	0	0	0	0	0	0	0	0	0	0	0	0	0	0	0	0
Viruses	Unknown KINGDOM	Unknown PHYLUM	Unknown CLASS	Unknown ORDER	Nimaviridae	0	0	0	0	0	0	0	0	0	0	0	0	0	0	0	0	0	0	0	0	0	0	0	0	0	0	0	0	0	0	0	0	0	0	0	0	0	0	0	0	0	0	0	0
Eukaryota	Viridiplantae	Streptophyta	Unknown CLASS	Ranunculales	Papaveraceae	0	0	0	0	0	0	0	0	0	0	0	0	0	0	0	0	0	0	0	0	0	0	0	0	0	0	0	0	0	0	0	0	0	0	0	0	0	0	0	0	0	0	0	0
Eukaryota	Metazoa	Arthropoda	Insecta	Lepidoptera	Sphingidae	0	5.75374e-05	0	0	0	0	0	0	0	0	0	0	0	0	0	0	0	0	0	0	0	0	0	0	0	0	0	0	0	0	0	0	0	0	0	0	0	0	0	0	0	0	0	0
Eukaryota	Metazoa	Arthropoda	Insecta	Hymenoptera	Apidae	0	0	0	0	0	0	0	0	0	0	0	0	0	0	0	0	0	0	0	0	0	0	0	0	0	0	0	0	0	0	0	0	0	0	0	0	0	0	0	0	0	0	0	0
Bacteria	Unknown KINGDOM	Proteobacteria	Alphaproteobacteria	Rickettsiales	Holosporaceae	0	0	0	0	0	0	0	0	0	0	0	0	0	0	0	0	0	0	0	0	0	0	0	0	0	0	0	0	0	0	0	0	0	0	0	0	0	0	0	0	0	0	0	0
Eukaryota	Viridiplantae	Streptophyta	Unknown CLASS	Vitales	Vitaceae	0	0	0	0	0	0	0	0	0	0	0	0	0	0	0	0	0	0	0	0	0	0	0	0	0	0	0	0	0	0	0	0	0	0.000104417	0	0	0	0	0	0	0	0	0	0
Eukaryota	Metazoa	Chordata	Actinopterygii	Perciformes	Nototheniidae	0	5.75374e-05	0	0	0	0	0	0	0	0	0	0	0	0	0	0	0	0	0	0	0	0	0	0	0	0	0	0	0	4.10981e-05	0	0	0	0	0	0	0	0	0	0	0	0	0	0
Eukaryota	Metazoa	Chordata	Actinopterygii	Siluriformes	Ictaluridae	0	0	0	0	0	0	0	0	0	0	0	0	0	0	0	0	0	0	0	0	0	0	0	0	0	0	0	0	0	0	0	0	0	0	0	0	0	0	0	0	0	0	0	0
Eukaryota	Viridiplantae	Streptophyta	Unknown CLASS	Lamiales	Linderniaceae	0	0	0	0	0	4.56038e-05	0	0	3.50963e-05	0	0	0	0	0	0	0	0	0	0	0	0	0	0	0	0	0	0	0	0	0	0	0	0	0	0	0	0	0	0	0	0	0	0	0
Eukaryota	Metazoa	Arthropoda	Arachnida	Ixodida	Ixodidae	0	0	0	0	0	0	0	0	0	0	0	0	0	0	0	0	0	0	0	0	0	0	0	0	0	0	0	0	0	0	0	0	0	0	0	0	0	0	0	0	0	0	7.7815e-05	0
Eukaryota	Unknown KINGDOM	Apicomplexa	Aconoidasida	Unknown ORDER	Theileriidae	0	0	0	0	0	0	0	0	0	0	0	0	0	0	0	0	0	0	0	0	0	0	0	0	0	0	0	0	0	0	0	0	0	0	0	0	0	0	0	0	6.13008e-05	0	0	0
Viruses	Unknown KINGDOM	Unknown PHYLUM	Unknown CLASS	Bunyavirales	Nairoviridae	0	0	0	0	0	0	0	0	0	0	0	0	0	0	0	0	0	0	0	0	0	0	0	0	0	0	0	0	0	0	0	0	0	0	0	0	0	0	0	0	0	0	0	0
					Sum of Spectra	1	1	1	1	1	1	1	1	1	1	1	1	1	1	1	1	1	1	1	1	1	1	1	1	1	1	1	1	1	1	1	1	1	1	1	1	1	1	1	1	1	1	1	1
					Sum of MP	193	230	203	178	201	207	208	195	219	201	165	202	184	189	129	141	177	151	142	203	195	187	195	204	189	190	194	212	176	172	206	189	216	214	196	185	150	225	178	201	199	183	210	155
					Average number of spectra	1
					STD of the number of spectra	9.9238e-09
					Spectral count (min)	1
					Spectral count (max)	1
					Average number of Metaproteins	193.45
					STD of the number of Metaproteins	20.3788
					Metaprotein (min)	129
					Metaprotein (max)	230
[truncated: 51 more columns]
