# Supplementary material for: Discovering Biomarkers for Non-Alcoholic Steatohepatitis Patients with and without Hepatocellular Carcinoma Using Fecal Metaproteomics
Source: Int J Mol Sci. 2022 Aug 9;23(16):8841. doi: 10.3390/ijms23168841 (PMC9408600; doi:10.3390/ijms23168841)
Supplement: Supplementary file 1 [file ijms-23-08841-s001.zip › Supplementary Table S4.xlsx]

## Sheet: Tabelle1
	Clinical parameter				Microbial metaproteins
	P-Value				P-Value
		Control	NASH	HCC		Control	NASH	HCC
	Control	0	0.0055	0.0004	Control	0	0.0001	0.0001
	NASH	0.0052	0	0.0007	NASH	0.0001	0	0.0978
	HCC	0.0006	0.0004	0	HCC	0.0001	0.0966	0
	R-Value				R-Value
		Control	NASH	HCC		Control	NASH	HCC
	Control	1	0.156691	0.201761	Control	1	0.383418	0.322055
	NASH	0.156691	1	0.1212	NASH	0.383418	1	0.0269594
	HCC	0.201761	0.1212	1	HCC	0.322055	0.0269594	1
	Hominidae metaproteins				Families
	P-Value				P-Value
		Control	NASH	HCC		Control	NASH	HCC
	Control	0	0.7992	0.3303	Control	0	0.0043	0.0142
	NASH	0.8025	0	0.2667	NASH	0.0045	0	0.042
	HCC	0.3275	0.2676	0	HCC	0.0149	0.0414	0
	R-Value				R-Value
		Control	NASH	HCC		Control	NASH	HCC
	Control	1	-0.0468664	0.0124834	Control	1	0.168725	0.12041
	NASH	-0.0468664	1	0.00734768	NASH	0.168725	1	0.0404595
	HCC	0.0124834	0.00734768	1	HCC	0.12041	0.0404595	1
