# Supplementary material for: Discovering Biomarkers for Non-Alcoholic Steatohepatitis Patients with and without Hepatocellular Carcinoma Using Fecal Metaproteomics
Source: Int J Mol Sci. 2022 Aug 9;23(16):8841. doi: 10.3390/ijms23168841 (PMC9408600; doi:10.3390/ijms23168841)
Supplement: Supplementary file 1 [file ijms-23-08841-s001.zip › Supplementary Table S5.xlsx]

## Sheet: Significance Analysis
Metaproteins	C_01	C_02	C_03	C_04	C_05	C_06	C_07	C_08	C_09	C_10	C_11	C_12	C_13	C_14	C_15	C_16	C_17	C_18	C_19	N_20	N_21	N_22	N_23	N_24	N_25	N_26	N_27	N_28	N_29	N_30	N_31	N_32	N_33	N_34	N_35	N_36	N_37	N_38	N_39	N_40	N_41	N_42	N_43	N_44	N_45	N_46	N_47	N_48	N_49
BLAST_CEL3A_HUMAN Chymotrypsin-like elastase family member 3A OS=Homo sapiens GN=CELA3A PE=1 SV=3_P09093	0.0429346	0.0237629	0.0205479	0.0443281	0.0699903	0.022209	0.0191544	0.0187764	0.0122135	0.0149426	0.0218735	0.0176359	0.0265145	0.0221692	0.026032	0.020358	0.0263626	0.0203503	0.0357866	0.0359503	0.108447	0.00693564	0.0602217	0.0361094	0.0642838	0.0272364	0.0566111	0.0750228	0.120668	0.0553181	0.0260352	0.0468675	0.0477943	0.0208486	0.0334847	0.0556755	0.0122411	0.0266969	0.0613052	0.101929	0.0405811	0.0291864	0.0236557	0.0229051	0.0328346	0.0278277	0.0358123	0.00917289	0.0343757
BLAST_KCP_MOUSE Kielin/chordin-like protein OS=Mus musculus GN=Kcp PE=1 SV=2_Q3U492	0.0114587	0.00494822	0	0.0130308	0.00541591	0.00246261	0.0117054	0.0100432	0.00701927	0.00791078	0.00903471	0.00971676	0.0133493	0.00760456	0.0124582	0.0132532	0.00651659	0.00024667	0.0124916	0.0277557	0.0667562	0.0160713	0.0618215	0.0820669	0.0509571	0.0149998	0.0413597	0.0464753	0.0627473	0.0454956	0.0161783	0.0294118	0.0256466	0.0031325	0.0227645	0.0392942	0.00968523	0.0316466	0.0129672	0.0435283	0.000122602	0.0256578	0.0175862	0.0257683	0.012271	0.0243364	0.0143981	0.0356094	0.0182321
EFTU1_YERPA Elongation factor Tu 1 OS=Yersinia pestis bv. Antiqua (strain Antiqua) GN=tuf1 PE=3 SV=1	0.0162134	0.0385501	0.0367601	0.017801	0.00995232	0.0343853	0.023269	0.0332832	0.0381497	0.0296105	0.0127199	0.0349317	0.0343399	0.025456	0.0117144	0.0196748	0.0424566	0.0236803	0.0114787	0.0289453	0.0044924	0.0234917	0.0154268	0.00790274	0.00982167	0.0341442	0.0151868	0.0157582	0.0130452	0.0298373	0.0136605	0.00292922	0.0190816	0.0424628	0.0127381	0.00832236	0.0181598	0.0093202	0.0289176	0.0213324	0.0426654	0.0227846	0.018092	0.00916205	0.0259427	0.0186374	0.0356903	0.0312806	0.0128697
AMY1_HUMAN Alpha-amylase 1 OS=Homo sapiens GN=AMY1A PE=1 SV=2	0.00242488	0.00287687	0.000502702	0.03153	0.00578623	0.00529004	0.00251844	0.00334773	0.00140385	0.014613	0.0225868	0.000631589	0.00414288	0.00219114	0.0187802	0.0053286	0.00157978	0.0178836	0.0405132	0.0337034	0.0484508	0	0.0202263	0.00433637	0.0335477	0.000197365	0.0246866	0.030641	0.013567	0.00189051	0.00626774	0.0435198	0.0144285	0.00163586	0.00914365	0.0454569	0.00484261	0.013638	0.00267868	0.0274411	0	0.00247001	0.00447436	0.0208055	0.0253264	0.0031319	0.0223293	0.0068539	0.0180628
BLAST_G3P_LACDE Glyceraldehyde-3-phosphate dehydrogenase OS=Lactobacillus delbrueckii subsp. bulgaricus GN=gap PE=3 SV=1_O32755	0.0112685	0.0205409	0.0158351	0.0158232	0.00726751	0.024398	0.0151816	0.0185338	0.0177587	0.022304	0.00713267	0.0193363	0.0242129	0.0136624	0.01283	0.0181719	0.0221169	0.0176369	0.0170493	0.0138118	0.0195231	0.00909837	0.00731345	0.00267477	0.00519971	0.0188977	0.00904743	0.0114951	0.00234813	0.0144254	0.00476777	0.00741272	0.00703387	0.0156277	0.00977425	0.000316039	0.00712941	0.00310673	0.0118105	0.0106182	0.0133023	0.00892227	0.0062252	0.00534453	0.014064	0.00785542	0.0173876	0.0106674	0.00982163
BLAST_IGHA2_HUMAN Immunoglobulin heavy constant alpha 2 OS=Homo sapiens GN=IGHA2 PE=1 SV=4_P01877	0.0181153	0.00736479	0	0.00860966	0.00421238	0.0105801	0.013479	0.00587065	0.00901976	0.00873482	0.00606277	0.0056843	0.00773338	0.00773345	0.0150614	0.0084711	0.00612164	0.00888012	0.00506415	0.00436162	0.0192711	0.00182713	0.0141127	0.0404458	0.0454493	0.00671042	0.0133127	0.0121422	0.0237857	0.0105622	0.0328923	0.0074725	0.0151859	0.00887543	0.0101526	0.0188043	0.0129136	0.0197462	0.00773164	0.0171427	0.00180837	0.00620022	0.00684772	0.0188967	0.0100297	0.00569903	0.00848026	0.0123164	0.0196997
BLAST_G3PC1_MAIZE Glyceraldehyde-3-phosphate dehydrogenase 1, cytosolic OS=Zea mays GN=GAPC1 PE=2 SV=2_P08735	0.0138361	0.00627158	0.0131331	0.0122164	0.026987	0.00934878	0.0120247	0.00878172	0.0077212	0.00593309	0.00784593	0.0131662	0.00405082	0.00947348	0.0120863	0.00819784	0.00414692	0.00814011	0.012154	0.00740153	0.00570997	0.0214781	0.015084	0.00551165	0.0122482	0.0111511	0.00956443	0.00597594	0.0177849	0.0299605	0.00964268	0.0108202	0.0137431	0.0116251	0.00466641	0.0170661	0.0142588	0.00858301	0.0178985	0.0172066	0.0120456	0.0232382	0.0193759	0.00190876	0.0173138	0.0132464	0.0104326	0.0109766	0.0144502
BLAST_PPDK_CLOSY Pyruvate, phosphate dikinase OS=Clostridium symbiosum GN=ppdK PE=1 SV=5_P22983	0.0140262	0.0253165	0.0164007	0.0104712	0.00634171	0.0182415	0.0129824	0.0245985	0.0230934	0.0281272	0.00546838	0.0278385	0.0207144	0.0131469	0.00613611	0.0133898	0.0262638	0.0098668	0.00776502	0.0120936	0.00016794	0.00585428	0.00731345	0.0021074	0.00543081	0.0249667	0.0029081	0.000380633	0.00100013	0.00916489	0.00466063	0.00591822	0.00367926	0.0273224	0.0100895	0	0.00147969	0.00437049	0.0141848	0.00431765	0.0152946	0.0072588	0.00501906	0.0047719	0.00711604	0.00354264	0.0157403	0.0130379	0.00316098
BLAST_NIFJ_ANAVA Pyruvate-flavodoxin oxidoreductase (Fragment) OS=Anabaena variabilis GN=nifJ PE=3 SV=1_P0C181	0.0115063	0.0234177	0.0117507	0.00500291	0.00532334	0.0177855	0.00900965	0.0195041	0.0193732	0.0259298	0.00297195	0.0154982	0.0188731	0.0112135	0.0117144	0.0121601	0.0199447	0.0180069	0.0116475	0.00938409	0.000125955	0.0121187	0.00965604	0.00328268	0.00261911	0.0143583	0.00607471	0.00129415	0.00208723	0.00571264	0.00139283	0.00310856	0.00703387	0.0199088	0.00731492	0.000105346	0.00228679	0.00505503	0.0122367	0.00786772	0.0159382	0.00867023	0.0133064	0.00782592	0.00963747	0.00970375	0.0170215	0.0133986	0.00575751
BLAST_PCKA_EUBE2 Phosphoenolpyruvate carboxykinase (ATP) OS=Eubacterium eligens (strain ATCC 27750 / VPI C15-48) GN=pckA PE=3 SV=1_C4Z0Q6	0.0126474	0.00972382	0.0125047	0.0141943	0.0108781	0.0191536	0.0131598	0.012275	0.0131962	0.0124705	0.00285307	0.0156926	0.00929847	0.0148869	0.0141316	0.0181719	0.00918246	0.00789344	0.00877785	0.0097806	0.000461836	0.0120441	0.0102845	0.00636271	0.0124793	0.014161	0.00691483	0.00517661	0.0121755	0.00579484	0.0018214	0.0104615	0.00483353	0.0106853	0.0104048	0.0051093	0.011703	0.0048444	0.0127237	0.0151917	0.0141298	0.00801492	0.008832	0.00190876	0.00980557	0.0106793	0.0156793	0.0104612	0.00508015
BLAST_IGKC_HUMAN Immunoglobulin kappa constant OS=Homo sapiens GN=IGKC PE=1 SV=2_P01834	0.010175	0.000978136	6.28e-05	0.0108202	0.00129612	0.00424115	0.00666856	0.00261996	0.00635244	0.00362578	0.00582501	0.00247777	0.00193335	0.0042534	0.00687988	0.00942752	0.00187599	0.00555007	0.00270088	0.00422945	0.0109581	0.000708479	0.0143984	0.0186829	0.0292339	0.00281245	0.01118	0.0106958	0.0136974	0.0102745	0.0142497	0.00699426	0.0177831	0.00316731	0.00510783	0.011114	0.00322841	0.0160076	0.00133934	0.0113218	0.000459756	0.00277246	0.00186756	0.0124069	0.00728414	0.00261847	0.00372156	0.010925	0.0237638
Metagenome unknown	0.00446938	0.00914845	0.00929999	0.00570099	0.00259223	0.0127691	0.00979001	0.0143613	0.0109501	0.0116464	0.00451736	0.0108828	0.00754925	0.0139847	0.00725177	0.0124334	0.0156991	0.0103601	0.0102971	0.00700502	0.000419851	0.0123797	0.00605645	0.00518744	0.00508416	0.00986826	0.00504071	0.0015606	0.00417446	0.00690449	0.00278567	0.00872788	0.00555495	0.0157321	0.00844999	0.00379247	0.00349744	0.00389658	0.0121149	0.00546902	0.0167045	0.0079141	0.0103883	0.0047719	0.00560318	0.00595574	0.00799219	0.00963669	0.00891849
CTRC_HUMAN Chymotrypsin-C OS=Homo sapiens GN=CTRC PE=1 SV=2	0.0100323	0.00322209	0.000942566	0.00860966	0.0129612	0.00228019	0.00418559	0.00509437	0.00280771	0.00373565	0.00582501	0.00262352	0.0046032	0.00580009	0.00873931	0.00724143	0.00612164	0.00320671	0.00894666	0.00337034	0.0283399	0.0016034	0.00588504	0.00405269	0.00785734	0.00547688	0.0108569	0.0105816	0.0125669	0.00817853	0.00262495	0.0148852	0.00916207	0.00375901	0.0139362	0.0104293	0.00780199	0.00431783	0.0133325	0.0122813	0.00251333	0.00988003	0.0078204	0.0101164	0.0129434	0.00462084	0.0104326	0.00170059	0.0058704
BLAST_DHE2_BACFR NAD-specific glutamate dehydrogenase OS=Bacteroides fragilis (strain YCH46) GN=gdhB PE=2 SV=2_P94316	0.0129327	0.0132911	0.0117507	0.00314136	0.026663	0.0133619	0.00847758	0.00984911	0.00831783	0.00950393	0.00511175	0.0141379	0.00478733	0.00824902	0.00576423	0.00983741	0.007109	0.0143069	0.00995949	0.00793021	0.00272903	0.00648818	0.006285	0.00380952	0.00816547	0.00912814	0.00336048	0.00411084	0.00382659	0.0116719	0.00149997	0.00573888	0.00854886	0.0115207	0.00573843	0.0013695	0.00403551	0.00210626	0.0107147	0.00386989	0.0103598	0.014316	0.0083262	0.00305402	0.00565921	0.00739334	0.0112257	0.00845143	0.00620908
CEL2A_HUMAN Chymotrypsin-like elastase family member 2A OS=Homo sapiens GN=CELA2A PE=1 SV=1	0.00870103	0.0013809	0.00144527	0.00942408	0.00643429	0.00141372	0.00227015	0.00130998	0.000140385	0.0019777	0.0032097	0.000825924	0.000552384	0.0007089	0.0115284	0.000273261	9.87e-05	0.000616675	0.0119851	0.000396511	0.0263666	0.000410172	0.00211404	0.000445795	0.00181027	9.87e-05	0.00988755	0.0550776	0.0452668	0.000328785	0.0111427	0.00621712	0.00638459	0.000661307	0.00100895	0.0111667	0.000134517	0.00531831	0.00864483	0.047782	0.000306504	0.00110898	0.000855965	0.0171789	0.0126632	0.0010782	0.0013422	0.000154599	0.000338677
BLAST_A1AT_HUMAN Alpha-1-antitrypsin OS=Homo sapiens GN=SERPINA1 PE=1 SV=3_P01009	0.00689426	0.00299195	0.00634661	0.00360675	0.00490673	0.00529004	0.0053916	0.00198923	0.00456252	0.00390046	0.00725154	0.00369237	0.00349843	0.00470452	0.00502045	0.00642164	0.00118483	0.00653675	0.00641459	0.00581549	0.008439	0.00499664	0.00874186	0.0070922	0.00689443	0.00473676	0.0104046	0.00662302	0.00891421	0.018412	0.00530348	0.00783118	0.00789958	0.00055689	0.00819775	0.00500395	0.0107614	0.00426518	0.00742725	0.00530911	0.0037087	0.0078637	0.00704225	0.00763505	0.00762033	0.00487755	0.00506375	0.00814223	0.0396816
BLAST_RRBR2_CLOAB Reverse rubrerythrin-2 OS=Clostridium acetobutylicum (strain ATCC 824 / DSM 792 / JCM 1419 / LMG 5710 / VKM B-1787) GN=rbr3B PE=1 SV=1_Q97D83	0.00361354	0.0107595	0.013573	0.00779523	0.0077767	0.00743342	0.00666856	0.0100432	0.0108799	0.00752623	0.00974798	0.0118544	0.0094826	0.0056712	0.00855337	0.00696817	0.0102686	0.00863345	0.0104659	0.00812847	4.2e-05	0.001939	0.00542795	0.00372847	0.00369757	0.010263	0.00601008	0.00121803	0.00291342	0.012124	0.00128569	0.00490196	0.00854886	0.00863179	0.00466641	0.00368712	0.00766747	0.0027908	0.00803604	0.00249464	0.0102679	0.00614981	0.00249008	0.0080168	0.00285762	0.00400472	0.00561284	0.0066993	0.00711221
BLAST_CBPA1_HUMAN Carboxypeptidase A1 OS=Homo sapiens GN=CPA1 PE=1 SV=2_P15085	0.00375618	0.00494822	0.00345608	0.00500291	0.00597139	0.000501642	0.00528519	0.00203775	0.00487839	0.00390046	0.0064194	0.000242919	0.00313018	0.00773345	0.0167348	0.0122968	0.00592417	0.00444006	0.00540176	0.00277558	0.0128894	0.00607801	0.00622786	0.00137791	0.0136733	0.000197365	0.0191289	0.0291565	0.00747924	0.00205491	0.014839	0.00699426	0.00364318	0.000904946	0.011666	0.00995523	0.00591875	0.00310673	0.000608791	0.0181022	0.000398455	0.00494001	0.0077815	0.0238595	0.00750827	0.00328593	0.00726008	0.00417418	0.00180628
BLAST_CH60_AGARV 60 kDa chaperonin OS=Agathobacter rectalis (strain ATCC 33656 / DSM 3377 / JCM 17463 / KCTC 5835 / VPI 0990) GN=groL PE=3 SV=1_C4ZD46	0.00446938	0.00678941	0.0051527	0.00511925	0.00259223	0.00615651	0.014685	0.00829654	0.0119328	0.00346097	0.00344746	0.00825924	0.00874609	0.00238448	0.00873931	0.00259598	0.00306082	0.00431672	0.00523295	0.0146709	0.0134772	0.00589156	0.00234259	0.00231003	0.00720256	0.0129768	0.00555771	0.00251218	0.00195678	0.0136035	0.0102855	0.00771162	0.00598781	0.00716996	0.00145037	0.00742692	0.00793651	0.00526565	0.00852307	0.00358205	0.00524122	0.00766206	0.00319041	0.00171788	0.00790049	0.00410741	0.0100665	0.00783303	0.00524949
BLAST_FLA_BACHD Flagellin OS=Bacillus halodurans (strain ATCC BAA-125 / DSM 18197 / FERM 7344 / JCM 9153 / C-125) GN=hag PE=1 SV=1_Q05203	0.00156904	0.0127158	0.0191027	0.00442118	0.0123131	0.00424115	0.000461124	0.0207656	0.00887937	0.0041202	0.00772706	0.0104455	0.00727306	0.00431784	0.00223131	0.0102473	0.00592417	0.00481006	0.006921	0.0106397	0	0.00421359	0.000514227	0.00624114	0.00269615	0.00838802	0.00478222	0.00905907	8.7e-05	0.00406872	0.00251781	0.00520086	0.0158352	0.00971076	0.00151343	0.000105346	0.00269034	0.00258017	0.00724461	3.2e-05	0.00824496	0.0091239	0.00252899	0.00209964	0.00498683	0.00718797	0.00970045	0.0124195	0.00558817
PIGR_HUMAN Polymeric immunoglobulin receptor OS=Homo sapiens GN=PIGR PE=1 SV=4	0.00408901	0.00368239	0	0.00116347	0.00115725	0.00451478	0.00468218	0.00368735	0.00396589	0.00587815	0.00154541	0.00272069	0.00220954	0.00277115	0.00539234	0.00273261	0.00543049	0.00604341	0.00118163	0.00528681	0.00411453	3.73e-05	0.00651354	0.0436474	0.0125178	0.00291114	0.00723795	0.00437728	0.00669653	0.00341115	0.00873199	0.00609756	0.0048696	0.00337614	0.00851305	0.0105873	0.00712941	0.0124269	0.00474857	0.00518118	3.07e-05	0.00267164	0.00560268	0.0124069	0.00521096	0.00703394	0.00414862	0.010049	0.0108377
GLUD1_ORYSJ Glutelin type-D 1 OS=Oryza sativa subsp. japonica GN=GLUD1 PE=2 SV=1	0.000380373	0.00207135	0.00904864	0	0.000231449	0.011629	0.00266033	0.00805395	0.00803706	0.0335659	0.000118878	0.00325511	0.0155588	0.000515564	0.0355151	0.00122968	0.007109	0.0128268	0.00253207	0	0	0.000335595	0	0.0010537	0.000154065	0.00769724	0.00116324	0	0.000695743	0	0.00208925	0	0	0.000278445	0	0	0.0442561	0	6.09e-05	6.4e-05	0	0	0.0225274	0.00209964	0	0.0162756	0.000488073	0	0.108546
BLAST_ACDS_CLOAB Acyl-CoA dehydrogenase, short-chain specific OS=Clostridium acetobutylicum (strain ATCC 824 / DSM 792 / JCM 1419 / LMG 5710 / VKM B-1787) GN=bcd PE=1 SV=1_P52042	0.00575314	0.0135788	0.00653513	0.00849331	0.0111559	0.00930317	0.00503689	0.0104798	0.00610676	0.0106026	0.00118878	0.00714182	0.00957466	0.00844235	0.00818148	0.00587512	0.0115521	0.00456339	0.00810263	0.00581549	0.00109161	0.00264748	0.00165695	0.00275583	0.000924392	0.0101643	0.00361897	0.000494823	0.000782711	0.00143844	0.000749987	0.0068747	0.00302997	0.00306289	0.00712574	0.000526732	0.000269034	0.00394924	0.00645318	0.000543704	0.00426041	0.00342777	0.0020621	0.00114526	0.0047627	0.00390204	0.00970045	0.00587477	0.00547528
BLAST_CTRB1_HUMAN Chymotrypsinogen B OS=Homo sapiens GN=CTRB1 PE=2 SV=2_P17538	0.0034709	0.00103567	0.000691215	0.00709715	0.00328658	0.0011401	0.0029441	0.00208626	0.00238655	0.00120859	0.00285307	0.00165185	0.00165715	0.00122446	0.00278914	0.00109304	0.00335703	0.00308337	0.00844024	0.00158604	0.0092787	0.000671191	0.00434236	0.00182371	0.0042368	0.000937485	0.0039421	0.0165576	0.00347871	0.00176722	0.00841056	0.002989	0.0034989	0.000487279	0.00832387	0.00405583	0.00349744	0.0215365	0.0011567	0.00879522	0.000490406	0.00403267	0.00396856	0.00267227	0.0216283	0.00421009	0.0040266	0.000721464	0.00107248
PPBI_HUMAN Intestinal-type alkaline phosphatase OS=Homo sapiens GN=ALPI PE=1 SV=2	0.00394637	0.00172612	0	0.00686446	0.00652687	0.000912076	0.000283768	0.00160109	0.00136876	0.00230731	0.00368521	0.00111743	0.00745719	0.000580009	0.0039048	0.00478207	0.000493681	0	0.00523295	0.000330426	0.00957259	0.0038407	0.00828477	0.00425532	0.00693294	0	0.00717332	0.00993453	0.00830543	0.000123294	0.00803557	0.0101626	0.00259712	0.0018447	0.00542313	0.0029497	0.00295938	0.00563425	0.0070011	0.00818755	0.00303439	0.00247001	0.00396856	0.00668066	0.00487477	0.00472352	0.00237936	0.00221592	0.00874915
Metagenome unknown	0.00109357	0	0	0.00744619	0.000648058	0	0.00113507	0	0.00126347	0	0.00558726	0	0	0.000193336	0	0.000956415	0	0	0.000506415	0	0.0209086	0.00167798	0.00468518	0.0118338	0.0112468	0	0.0102107	0.0165956	0.0110449	0.00854841	0.0161783	0.00460306	0.00660102	0	0.00409888	0.00679484	0	0.00737191	0	0.00924297	0	0	0	0.00916205	0.00700398	0	0.0046977	0	0
BLAST_HBD_CLOAB 3-hydroxybutyryl-CoA dehydrogenase OS=Clostridium acetobutylicum (strain ATCC 824 / DSM 792 / JCM 1419 / LMG 5710 / VKM B-1787) GN=hbd PE=1 SV=2_P52041	0.00375618	0.00673188	0.00596959	0.00756254	0.00347174	0.00629332	0.00588819	0.00771433	0.00800196	0.00593309	0.00297195	0.00636448	0.0048794	0.00715344	0.0039048	0.00874436	0.00612164	0.00505673	0.00573936	0.00455987	0	0.00231188	0.000799909	0.00263424	7.7e-05	0.0112992	0.00297273	0.00022838	0	0.00152063	0.000107141	0.00705404	0.0037514	0.00393303	0.00592761	0	0.00215227	0.00210626	0.00663582	0.000223878	0.00551707	0.00277246	0.00346277	0	0.00465064	0.00261847	0.00884632	0.00355579	0.00705577
Metagenome unknown	0.00237733	0.00604143	0.0127561	0.00244328	0.00282368	0.00893834	0.00227015	0.0065499	0.0141087	0.00142834	0.0010699	0.00427537	0.00681274	0.00431784	0.000557828	0.00655827	0.00631912	0.00345338	0.00844024	0.00581549	0	0.00178984	0.0006285	0.0043769	0	0.00374994	0.00239111	0.000723203	0.000260904	0.00291797	0	0.00723338	0.000360711	0.0108594	0.00536007	0.00258099	0.00309389	0.000842504	0.00340923	0.000351809	0.00429106	0.00287327	0.0031126	0.00362665	0.00610747	0.00210505	0.00787017	0.00443185	0.00423346
MGA_HUMAN Maltase-glucoamylase, intestinal OS=Homo sapiens GN=MGAM PE=1 SV=5	0.00446938	0	0.00163378	0.00465387	0.00523076	0.00487961	0.00493048	0.00441512	0.00126347	0.0019777	0.00166429	0.0033037	0.00644448	0.00470452	0.00669394	0.00778795	0	0.00505673	0.0109723	0.000859107	0.00361072	0.00372884	0.010913	0.00522796	0.00246505	0.000197365	0.00426522	0.00647077	0.0086533	0.00419201	0.0121069	0.00693448	0.0032464	0	0.0032791	0.00173821	0.000403551	0.00310673	0.00194813	0.0078997	0.00220683	0.0030245	0.00408529	0.00687154	0.0026335	0.00528829	0.00378256	0.00247359	0.00428991
DNAK_CLOTH Chaperone protein DnaK OS=Clostridium thermocellum (strain ATCC 27405 / DSM 1237 / NBRC 103400 / NCIMB 10682 / NRRL B-4536 / VPI 7372) GN=dnaK PE=3 SV=1	0.00232978	0.00460299	0.00458716	0.00267597	0.00152757	0.00378511	0.00681044	0.0049003	0.0128102	0.00269186	0.0021398	0.00558714	0.00672068	0.00116002	0.00613611	0.00464544	0.00424566	0.00160336	0.00320729	0.0048903	0.00125955	0.00350511	0.00348532	0.00149949	0.00146362	0.00518084	0.00426522	0.00338764	0.000652259	0.00378103	0.00267852	0.00340746	0.00295783	0.00532526	0.00182873	0.00574137	0.0176217	0.0027908	0.00200901	0.00291042	0.00459756	0.0036294	0.00194537	0.00209964	0.00425842	0.00220773	0.00652797	0.00510178	0.00180628
BLAST_DMBT1_RABIT Deleted in malignant brain tumors 1 protein OS=Oryctolagus cuniculus GN=Dmbt1 PE=1 SV=2_Q95218	0.00242488	0.0018412	0.00188513	0.00151251	0.000462899	0.00095768	0.00120602	0.00106739	0.00112308	0.00115366	0.00118878	0.000145751	0.00211747	0.00251337	0.00595017	0.000819784	0.000691153	0.00135669	0.00168805	0.000793021	0.00524813	0.00287121	0.00297109	0.00113475	0.00454493	0.00103617	0.00374822	0.00563337	0.00795756	0.00254808	0.00278567	0.00669536	0.00223641	0.00153145	0.00744104	0.000526732	0.00295938	0.00542362	0.00182637	0.00297438	0.000122602	0.00307491	0.00112832	0.0242413	0.00235334	0.0020537	0.00280642	0.00144293	0.00158049
EFG_MYCLE Elongation factor G OS=Mycobacterium leprae (strain TN) GN=fusA PE=3 SV=2	0.00242488	0.00621404	0.00446148	0.00127981	0.000833218	0.00633893	0.00301504	0.00446364	0.0067034	0.00543866	0.00154541	0.00432396	0.0058921	0.00476896	0.00409074	0.00642164	0.00780016	0.00518007	0.00185685	0.00231298	0.000461836	0.00742039	0.00325677	0.00145897	0.000308131	0.00419401	0.00122787	0.00437728	0.000869679	0.00291797	0.00117855	0.00155428	0.00158713	0.00699593	0.00258545	0.00479326	0.00672585	0.00231689	0.00450505	0.00211085	0.0102985	0.00443593	0.00544705	0.00248139	0.00588334	0.00343996	0.00530779	0.00515331	0.00169338
BLAST_ENO_BACTN Enolase OS=Bacteroides thetaiotaomicron (strain ATCC 29148 / DSM 2079 / NCTC 10582 / E50 / VPI-5482) GN=eno PE=3 SV=1_Q89Z05	0.00114112	0.00350978	0.00389594	0.000814427	0.000833218	0.0023714	0.00755533	0.00140702	0.00389569	0.00126353	0.000356633	0.00281786	0.00101271	0.00296449	0.000371885	0.00136631	0.00227093	0.00382338	0.00101283	0.00264341	0.00621379	0.00701022	0.00102845	0.00275583	0.005893	0.0090788	0.00232648	0.00628045	0.000739227	0.00139734	0.00348208	0.00017934	0.00220034	0.00135742	0.00807164	0.00589939	0.0108959	0.000895161	0.00225253	0.00143922	0.00171642	0.00524246	0.00322932	0.000572628	0.00268953	0.0027725	0.0046977	0.00572018	0.00169338
BLAST_TRY6_HUMAN Putative trypsin-6 OS=Homo sapiens GN=PRSS3P2 PE=5 SV=2_Q8NHM4	0.0020445	0.000978136	0.000628378	0.00593368	0.00277739	0.00100328	0.0024475	0.00203775	0.00252694	0.000933912	0.00558726	0.00276928	0.0048794	0.00631565	0.0039048	0.00587512	0.00138231	0.00160336	0.00489534	0.0013217	0.00965656	0.000894921	0.00371386	0.00162107	0.00454493	0.00207233	0.00355435	0.00460566	0.00347871	0.00378103	0.00749987	0.00454328	0.00378747	0.000661307	0.00315298	0.00447722	0.00457358	0.00510768	0.00401802	0.0034861	0.000613008	0.00357899	0.000817057	0.00572628	0.0061635	0.000924167	0.0040266	0.00066993	0.00282231
CLCA1_MACMU Calcium-activated chloride channel regulator 1 OS=Macaca mulatta GN=CLCA1 PE=2 SV=1	0.00318562	0.00224396	0.000879729	0.00151251	0.000740638	0.00300985	0.00258939	0.00257144	0.00161443	0.00131846	0.00237756	0.0035952	0.00110477	0.00135335	0.00241726	0.00314251	0.000789889	0.00160336	0.00489534	0.000594766	0.00524813	7.46e-05	0.00548509	0.00757852	0.00550784	9.87e-05	0.00607471	0.00719397	0.0081315	8.22e-05	0.0070713	0.00561932	0.000577138	0.00208834	0.00334216	0.0051093	0.000807103	0.00347533	0.00152198	0.00454153	0.00232943	0.00131062	0.00326823	0.00610804	0.0024654	0.00379935	0.00170826	0.00489564	0.00118537
BLAST_UGPC3_RHIEC sn-glycerol-3-phosphate import ATP-binding protein UgpC 3 OS=Rhizobium etli (strain CFN 42 / ATCC 51251) GN=ugpC3 PE=3 SV=1_Q2K1C8	0.00446938	0.00517837	0.00320472	0.00290867	0.00337916	0.00428676	0.00422106	0.0092669	0.00628224	0.0048893	0.00178317	0.0056843	0.00699687	0.00657344	0.00316103	0.0116136	0.0131319	0.00296004	0.00455773	0.00376685	4.2e-05	0.00100679	0.00154268	0.000283688	0.00100143	0.00631569	0.00161561	0.00022838	0.000391355	0.00110965	0.00107141	0.0020923	0.00126249	0.00455953	0.00378358	0.00105346	0.00121065	0.00168501	0.00219165	0.00111939	0.00281984	0.00282286	0.000817057	0.00267227	0.00308175	0.00200236	0.00530779	0.00262819	0.000225785
ILVC_CLOBB Ketol-acid reductoisomerase (NADP(+)) OS=Clostridium botulinum (strain Eklund 17B / Type B) GN=ilvC PE=3 SV=1	0.00366109	0.00443038	0.00326756	0.00267597	0.0036569	0.0047428	0.00365352	0.00844209	0.00456252	0.00708674	0.00261531	0.00500413	0.0035905	0.00792679	0.00595017	0.011477	0.00622038	0.00357671	0.00438893	0.00508855	4.2e-05	0.000708479	0.0018855	0.000810537	0.00142511	0.00523018	0.00142174	7.61e-05	4.35e-05	0.00267138	0.000160711	0.00286944	0.00140677	0.00504681	0.00302686	0.000158019	0.000538068	0.00110579	0.00249604	0.00108741	0.00508797	0.00282286	0.00159521	0.00267227	0.00280159	0.00164296	0.00152523	0.00298892	0.000620908
BLAST_THLA_CLOAB Acetyl-CoA acetyltransferase OS=Clostridium acetobutylicum (strain ATCC 824 / DSM 792 / JCM 1419 / LMG 5710 / VKM B-1787) GN=thlA PE=1 SV=1_P45359	0.00237733	0.00713464	0.00458716	0.00325771	0.00569365	0.00684057	0.00510783	0.00965504	0.00926543	0.00725155	0.00142653	0.00490696	0.00874609	0.00522008	0.00316103	0.00464544	0.00483807	0.00456339	0.00438893	0.00429553	0	0.00253561	0.000399954	0.00186423	0.000308131	0.00532886	0.00200336	0	0	0.00102745	0	0.0044835	0.00129856	0.00386342	0.00258545	0	0.00094162	0.00105313	0.00450505	0.000191896	0.00472016	0.00221797	0.00330714	0	0.00184905	0.00287519	0.0046977	0.00401958	0.00282231
S10A9_HUMAN Protein S100-A9 OS=Homo sapiens GN=S100A9 PE=1 SV=1	0.000380373	0.00132336	0.00125676	0.000814427	0.00124983	0.000866472	0.000851305	0.000339624	0.00175482	0.00153821	0.000237756	0.00165185	0.000644449	0.000902236	0.000743771	0.000683153	0.000197472	0.00049334	0.00033761	0.00151996	0.00377866	0.000969498	0.0006285	0.00340426	0.0021184	0.000246706	0.00516996	0.00289281	0.00478323	0.000493178	0.0104462	0.0008967	0.0371172	0.000174028	0.000882835	0.00158019	0.00417003	0.000631878	0.00158286	0.000223878	0.000613008	0.000403266	0.00229554	0.00171788	0.000336191	0.00195102	0.000793118	0.000309199	0.00841048
BLAST_THLA_SYNWW Acetyl-CoA acetyltransferase OS=Syntrophomonas wolfei subsp. wolfei (strain DSM 2245B / Goettingen) GN=Swol_1934 PE=1 SV=1_Q0AVM3	0.0021396	0.00650173	0.00483851	0.00477022	0.00328658	0.00337468	0.00457577	0.00892727	0.0086337	0.00703181	0.00130766	0.00558714	0.00828577	0.00728234	0.00334697	0.00259598	0.00227093	0.00222003	0.00320729	0.00707111	0	0.000708479	0.000571363	0.0010537	0	0.00671042	0.00239111	0	0	0.00123294	0	0.00221186	0.00266926	0.00212314	0.00214403	0	0.000269034	0.00152704	0.00353099	0.000319826	0.00312634	0.00352858	0.00186756	0	0.00240937	0.00220773	0.00359954	0.00463798	0.00468503
LIPP_HUMAN Pancreatic triacylglycerol lipase OS=Homo sapiens GN=PNLIP PE=1 SV=1	0.00028528	0.0018412	6.28e-05	0.000930774	0.000277739	0.000182415	0.00113507	0.00106739	0.00143895	0.000219744	0.000594389	0.000874508	0.000644449	0.000451118	0.00185943	0.000273261	0.000691153	0.00074001	0.000675219	0.00026434	0.0081451	0.00275934	0.00102845	0.000202634	0.0016562	0.00152958	0.00284348	0.00468179	0	0.0021371	0.00583918	0.00143472	0.000216427	0	0.00706268	0.000158019	0.00134517	0.00431783	0.000974066	0.00185499	0.00150187	0.00131062	0.000700335	0	0.00353001	0.00266982	0.00573485	0.00170059	5.64e-05
BLAST_ITLN2_HUMAN Intelectin-2 OS=Homo sapiens GN=ITLN2 PE=2 SV=1_Q8WWU7	0.00442183	0.00293441	0.000691215	0.00221059	0.00106467	0.00223459	0.00177355	0.00130998	0.00119328	0.00170302	0.000832145	0.00228344	0.00239367	0.000902236	0.00502045	0.00286924	0.00227093	0.00209669	0.00405132	0.000726936	0.00209925	0.001939	0.00257114	0.00616008	0.00415977	0.00172694	0.00400672	0.00388246	0.00473975	0.00180832	0.00101784	0.00484218	0.00357104	0.00132261	0.00151343	0.00126416	0.00201776	0.0015797	0.0014611	0.00425369	0.00122602	0.00534328	0.00357949	0.00534453	0.00358604	0.00297787	0.00207431	0.00180366	0.0044028
BLAST_PGK_CLOBA Phosphoglycerate kinase OS=Clostridium botulinum (strain Alaska E43 / Type E3) GN=pgk PE=3 SV=1_B2UY23	0.00299544	0.00356732	0.00377027	0.00116347	0.00120354	0.00369391	0.00322787	0.00460919	0.00972169	0.00417514	0.000594389	0.00592722	0.00423495	0.00174003	0.00223131	0.0035524	0.00266588	0.000863345	0.00168805	0.00317209	0.00214124	0.00178984	0.000399954	0.000688956	0.00134807	0.0099176	0.00129249	0.00197929	0.000173936	0.00456189	0.00289281	0.0008967	0.00198391	0.00887543	0.00170261	0.000263366	0.00121065	5.27e-05	0.0040789	0.00268654	0.00671244	0.00322613	0.00307369	0.000763504	0.000672382	0.000872824	0.00292844	0.00216439	0.000620908
ENPP7_RAT Ectonucleotide pyrophosphatase/phosphodiesterase family member 7 OS=Rattus norvegicus GN=Enpp7 PE=1 SV=1	0.00223469	0.00155351	0.00213648	0.00255963	0.00231449	0.00383072	0.00195091	0.00242589	0.00263223	0.00296654	0.00285307	0.00281786	0.00294605	0.00412451	0.00241726	0.00505534	0.00414692	0.00320671	0.00472654	0.00138779	0.00239315	0.00264748	0.00297109	0.00308004	0.0021184	0.00360191	0.00271423	0.00346376	0.00339175	0.00267138	0.0047142	0.00364658	0.0011182	0	0.0029638	0.00252831	0.00336293	0.0020536	0.00255692	0.00236671	0.00257463	0.00257082	0.00252899	0.00229051	0.00280159	0.00323458	0.00164725	0.00237052	0.00112892
BLAST_MUCAP_PIG Apomucin (Fragment) OS=Sus scrofa PE=1 SV=2_P12021	0.00228224	0.000575374	0.00131959	0.00104712	0.00148128	0.00223459	0.00230562	0.00189219	0.0019303	0.00313135	0.00142653	0.0020891	0.000920641	0.00109557	0.000185943	0.00109304	0.000691153	0.00111002	0.00101283	0.00231298	0.000965656	0.00316951	0.00331391	0.00741641	0.00743366	0.00236838	0.00348972	0.00361602	0.00130452	0.00254808	0.00101784	0.0014945	0.00169534	0.00191431	0.000882835	0.000421385	0.00269034	0.0020536	0.0014611	0.00339016	0.00128732	0.00221797	0.00540814	0.000572628	0.00280159	0.00138625	0.000854127	0.00845143	0.00259652
Metagenome unknown	0.00114112	0.00379747	0.00150811	0.000930774	0.00129612	0.00314666	0.00273127	0.00392994	0.00245674	0.00423007	0.00261531	0.0035952	0.000644449	0.00689566	0.00409074	0.00505534	0.00839257	0.0049334	0.00455773	0.00211472	0.000209925	0.00350511	0.00171409	0.000729483	0.00223395	0.0031085	0.000904743	0.00011419	0.00113058	0.000739767	0.000696416	0.00137494	0.00158713	0.00334134	0.00107201	0.00226495	0.000807103	0.000526565	0.00121758	0.00111939	0.00291179	0.00131062	0.00252899	0.00343577	0.00207318	0.00231042	0.000732109	0.00309199	0.000564462
Metagenome unknown	0.00209205	0.00126582	0.0010054	0.00314136	0.00245336	0.000684057	0.000886776	0.000776285	0.000456252	0.000659232	0.00118878	0.000825924	0.00184128	0.00109557	0.000557828	0.000409892	0.00138231	0.00049334	0.000168805	0.00224689	0.00373667	0.000335595	0.00371386	0.00279635	0.00223395	0.00222036	0.00452372	0.00350183	0.00343523	0.00345224	0.000803557	0.00346724	0.00238069	0.000661307	0.00384664	0.00452989	0.000269034	0.00294876	0.00304396	0.00227077	0.00275854	0.0024196	0.00132285	0.000763504	0.0024654	0.00220773	0.00366054	0.000309199	0.00152405
FTHS_PEPD6 Formate--tetrahydrofolate ligase OS=Peptoclostridium difficile (strain 630) GN=fhs PE=3 SV=1	0.013313	0.00264672	0.0010054	0.00244328	0.0022682	0.00264502	0.00344069	0.00756877	0.00168462	0.00494424	0.00178317	0.00422679	0.00294605	0.00431784	0.00669394	0.00956415	0.00177725	0.00407005	0.00388251	0.000991277	4.2e-05	0.000186442	0.00211404	0	0.00207988	0.00266443	0.000581621	3.81e-05	4.35e-05	0.00587703	0.00423207	0.00125538	0.00411211	0.00320212	0.00157649	0	0.000538068	0.00142173	0.00389626	0.00182301	0.00119537	0.0018147	0.000194537	0.00248139	0.00179302	0.00097551	0.00140321	0.00164906	0.000169338
MYSS_RABIT Myosin heavy chain, skeletal muscle (Fragments) OS=Oryctolagus cuniculus PE=1 SV=2	0.00014264	0.00161105	0	0.00302501	0	0.000547246	0.00297957	0	0.00312357	0	0	0.00111743	9.21e-05	0.00219114	0.000371885	0.000273261	0.000394945	0	0	0.00244515	0	0.00145425	0	4.05e-05	0	0.00399665	0.00284348	0.00491017	0.00143497	0.00332895	0.0023571	0.00017934	0.000144285	0.00156625	0.000126119	5.27e-05	0.00726392	0.00268548	0.000913186	0.000351809	0.00560902	0.00373021	0.00116722	0.00114526	0.00498683	0.0031319	0.000793118	0.0074723	0
BLAST_ALF_BACSU Probable fructose-bisphosphate aldolase OS=Bacillus subtilis (strain 168) GN=fbaA PE=1 SV=2_P13243	0.00133131	0.00304948	0.00251351	0.00162885	0.000416609	0.00310106	0.00223468	0.00344476	0.00705436	0.00368071	0.00118878	0.00534422	0.00349843	0.00270671	0.00185943	0.00300587	0.00306082	0.00160336	0.00253207	0.00231298	0.00016794	0.00115594	0.00119986	0.000729483	0.00100143	0.00809197	0.00109862	0.000152253	0	0.00258918	0.00128569	0.00143472	0.0011182	0.00591695	0.00201791	0.000368712	0.00134517	0.000789848	0.00499209	0.000927495	0.00514927	0.00206674	0.00167302	0.000763504	0.0022973	0.000872824	0.00634495	0.00314352	0.00101603
BLAST_RRBR2_CLOAB Reverse rubrerythrin-2 OS=Clostridium acetobutylicum (strain ATCC 824 / DSM 792 / JCM 1419 / LMG 5710 / VKM B-1787) GN=rbr3B PE=1 SV=1_Q97D83	0.000760746	0.00258918	0.00389594	0.00430483	0.00199046	0.0023714	0.00230562	0.00295958	0.00280771	0.00230731	0.00332858	0.00281786	0.00405082	0.00167558	0.00278914	0.00259598	0.00513428	0.00296004	0.00422012	0.00350251	0	0.00100679	0.000971318	0.00141844	0.00103994	0.00286179	0.00219723	0.000380633	0.00021742	0.00341115	5.36e-05	0.00251076	0.00201998	0.00236678	0.00277463	0.000790097	0.00282486	0.00168501	0.00267868	0.000415774	0.00211488	0.00176429	0.00101159	0.00248139	0.0012327	0.00118088	0.00244036	0.00211286	0.00282231
BLAST_LV144_HUMAN Immunoglobulin lambda variable 1-44 OS=Homo sapiens GN=IGLV1-44 PE=1 SV=2_P01699	0.00123621	0.000287687	0	0.00104712	0	0.00196096	0.00212826	0.00043666	0.00108799	0.00054936	0.000356633	0.000485838	0.000552384	0.000644454	0.00353291	0.00122968	0	0.00148002	0	0.00026434	0.0047863	0.000261019	0.00154268	0.00425532	0.00389015	0.000592096	0.00284348	0.0034257	0.00360917	0.00127404	0.00482134	0.00215208	0.00577138	0.0018795	0.00100895	0.00437187	0.000672585	0.00252751	0.000608791	0.00303835	0.000214553	0.00090735	0.000505797	0.00381752	0.00162492	0.000308056	0.0013422	0.00066993	0.00225785
BLAST_ACDB_METTH Acetyl-CoA decarbonylase/synthase complex subunit beta OS=Methanothermobacter thermautotrophicus (strain ATCC 29096 / DSM 1053 / JCM 10044 / NBRC 100330 / Delta H) GN=cdhC PE=3 SV=1_O27745	0.00551541	0.00316456	0.00125676	0.00186155	0.00374948	0.00168734	0.000957719	0.00325069	0.00119328	0.00318629	0.00166429	0.00349803	0.00322224	0.00103113	0.0052064	0.00382566	0.00266588	0.0028367	0.0033761	0.00165213	0	0.000484749	0.00365672	0.000202634	0.000731811	0.00335521	0.000775494	0.000761267	0	0.00369883	0.0023571	0.0008967	0.00205606	0.00452473	0.00138731	0	0	0.00173766	0.0066967	0.00211085	0.00257463	0.00161307	0.000894872	0.00114526	0.0022973	0.00179699	0.00250137	0.00154599	0.000282231
Metagenome unknown	0.00437429	0.00397008	0.000816891	0.00186155	0.0022682	0.00383072	0.00390182	0.0049003	0.00210578	0.0047245	0.000713267	0.00155468	0.00174922	0.00186892	0.00167348	0.00232272	0.00148104	0.00641342	0.00135044	0.00218081	0.00016794	0.00477291	0.000514227	0.0012158	0	0.00286179	0.000258498	0.00057095	0.00195678	0.000575374	0.000535705	0.00161406	0.00198391	0.00180989	0.00189179	0.000105346	0.00363196	0.000263283	0.00298308	0.00236671	0.00671244	0.000655308	0.00389075	0.00343577	0.000896509	0.00431278	0.00152523	0.00185519	0.000508015
ALBU_PONAB Serum albumin OS=Pongo abelii GN=ALB PE=2 SV=2	9.51e-05	0.000632911	0	0	0.000416609	0.00141372	0.00329881	0	0.00266732	0.000384552	0	0	0	0	0	0.000819784	0.000888626	0.000370005	0.000675219	0.0258393	0.00016794	0.00309494	5.71e-05	0.0521581	0.000731811	4.93e-05	6.46e-05	0.000837393	0	0.000780865	0.0168211	0	0.00133463	0	0	0.000105346	0.000807103	0.000579222	0	0	0.000521057	0	0.000972687	0.000190876	0.000112064	0.000513426	0	0.00360732	0.000112892
PERE_MOUSE Eosinophil peroxidase OS=Mus musculus GN=Epx PE=1 SV=2	0.00218714	0.00023015	0.000125676	0.00104712	0.00189788	0	0	0	7.02e-05	0.000714168	0	0.00136035	0	0	0	0	0	0.000123335	0.000168805	0	0.00717944	0.00108136	0	0.000162107	0.000346647	0	0.00516996	0.00205542	0.00665304	0.000493178	0.0110355	0	0.0199113	0	0.00119813	0.000790097	0.000538068	0.000210626	0.000121758	6.4e-05	0.000122602	0.00357899	0.00233445	0.00515366	0.000504286	0.00200236	0	0	0.00739445
Metagenome unknown	0.00152149	0.00258918	0.00358175	0.00302501	0.000925797	0.00095768	0.00205732	0.00198923	0.00157934	0.000439488	0.00130766	0.00398387	0.00147302	0.00270671	0.00334697	0.00232272	0.00177725	0.00049334	0.00303849	0.00257732	0	0.000261019	0.006285	0.000607903	0.00924392	0.00118419	0.00252036	0.00140834	0.00556594	0.000205491	0	0.00191296	0.00288569	0.00480317	0.00145037	0.0021596	0	0.00194829	0.00170462	0.0066204	0.000704959	0.0018147	0.000272352	0	0.00257746	0.000410741	0.00427064	0.00154599	0.003669
BLAST_OMPC_ECO57 Outer membrane protein C OS=Escherichia coli O157:H7 GN=ompC PE=3 SV=1_Q8XE41	0	0	0	0	0	0	0	0.00111591	0	0	0	0	0	0	0	0	0	0	0	0	0.00403056	0.0127153	5.71e-05	0	0.00335092	0	6.46e-05	0	0.000521807	0.006699	0.000374993	0	3.61e-05	0	0	0.01596	0.00955071	0.00136907	0	0	0	0.0119468	0	0	0.00543509	0	0	0.00164906	0
BLAST_CDHR2_HUMAN Cadherin-related family member 2 OS=Homo sapiens GN=CDHR2 PE=1 SV=2_Q9BYE9	0.00152149	0.000517837	0.00113108	0.00104712	0.00171273	0.00132251	0.00067395	0.00160109	0.000807216	0.00054936	0.000594389	0.000825924	0.00165715	0.000966682	0	0.00109304	0.000592417	0.00098668	0.00101283	0.00264341	0.000209925	0.000783056	0.00228545	0.00117528	0.00227246	0.000986826	0.0039421	0.00220767	0.00186981	0.00341115	0.000107141	0.00382592	0.00104606	0.00118339	0.00132425	0.000842771	0.000807103	0.00294876	0.00206989	0.00191896	0.00137927	0.00352858	0.00178974	0.00439015	0.00179302	0.00302921	0.00176926	0.00278279	0.00237074
Metagenome unknown	9.51e-05	0.00235903	0.00113108	0.00209424	0.000324029	0.00342028	0.00326334	0.00252293	0.00333415	0.0035159	0.000713267	0.0015061	0.00349843	0.00341561	0.00148754	0.00314251	0.00207346	0.000370005	0.00455773	0.00244515	0	0.00145425	0	0.00291793	3.85e-05	0.00330587	0.000581621	0	0	0	0	0.00633668	0.000360711	0.00320212	0.0032791	0	0.00107614	0.00337002	0.00541824	0	0.00257463	0.000504083	0.00307369	0	0.00313778	0.000513426	0.00420963	0.00066993	0.00287875
BLAST_PFLB_STAAW Formate acetyltransferase OS=Staphylococcus aureus (strain MW2) GN=pflB PE=3 SV=1_Q7A1W9	0.00337581	0.00443038	0.00245067	0.000581734	0.00370319	0.00323787	0.00170261	0.00795692	0.00200049	0.00329616	0.000118878	0.00607297	0.00174922	0.00186892	0	0.00587512	0.00365324	0.000370005	0.000506415	0.00145387	0.00176337	0.00402715	0.000971318	0.000851064	0.000616262	0.00488479	0	0	0	0.00102745	0.00332137	0.00017934	7.21e-05	0.00160106	0.00409888	0.00463524	0.00134517	0.00105313	0.00066967	0.000831548	0.00272789	0.00367981	0.000894872	0.000763504	0.00224127	0.00143759	0.00256238	0.00144293	0.000112892
DPEP1_HUMAN Dipeptidase 1 OS=Homo sapiens GN=DPEP1 PE=1 SV=3	0.000380373	0.000863061	0.00169662	0.00209424	0.00236078	0.00287304	0.00223468	0.00252293	0.00105289	0.00148327	0.00142653	0.00233202	0.00101271	0.00161114	0.0013016	0.00163957	0.000691153	0.000863345	0.000675219	0.00165213	0.00268704	0.0016034	0.00285682	0.00145897	0.00042368	0.00108551	0.00239111	0.00125609	0.000173936	0.000739767	0.00369636	0.00352702	0.000865707	0.00087014	0.00113507	0.00200158	0	0.000737191	0.00170462	6.4e-05	0.00159382	0.00352858	0.00198428	0.00267227	0.000728414	0.00102685	0.00103716	0.00242206	0.00214495
AACT_HUMAN Alpha-1-antichymotrypsin OS=Homo sapiens GN=SERPINA3 PE=1 SV=2	0.00237733	0.000632911	0.00131959	0.00151251	0.00120354	0.00136811	0.00117055	0	0.00066683	0.000878976	0.000713267	0.00155468	0.00110477	0.000837791	0.0013016	0.00163957	0.000197472	0.00074001	0.00219446	0.000793021	0.00264506	0.000708479	0.00217118	0.00101317	0.00204137	9.87e-05	0.00135712	0.00171285	0.00273949	0.00341115	0.00299995	0.00221186	0.00176749	0	0.00195485	0.00105346	0	0.000947817	0.00255692	0.00153517	0.00076626	0.00191552	0.00077815	0.00171788	0.00100857	0.000770139	0.00109816	0.00278279	0.00524949
BLAST_NADB_RHORU L-aspartate oxidase (Fragment) OS=Rhodospirillum rubrum GN=nadB PE=3 SV=1_Q59767	0.00123621	0.00149597	0.000816891	0.00255963	0.00245336	0.002417	0.00251844	0.000630731	0.000491349	0.000219744	0	0.00145751	0.000184128	0.00328672	0.00241726	0.00382566	0.00138231	0.00296004	0.00236327	0.000859107	4.2e-05	0.00607801	0.002514	0.00295846	0.00107846	0.00113485	0.000452372	3.81e-05	0.00213071	0.000904159	0	0.00041846	0.00104606	0.00139222	0.00258545	0.00126416	0.000134517	0.000842504	0.000426154	0.00137525	0.00441366	0.00136102	0.00494125	0.000190876	0.000560318	0.00364533	0.00140321	0.00180366	0.00141115
BLAST_IGHM_HUMAN Immunoglobulin heavy constant mu OS=Homo sapiens GN=IGHM PE=1 SV=4_P01871	0.00156904	0	0	0	0	0.000456038	0.000461124	0	0.000421156	0.00159314	0	0	0	0.000128891	0.0013016	0.000273261	0	0	0.000168805	0	0.00310689	0	0.002514	0.00506586	0.00785734	0.000345389	0.00135712	0.00220767	0.0035222	0.000534276	0.0104998	0.00083692	0.0013707	0.0018447	0.00258545	0.00521464	0.000269034	0.0020536	0.000791428	0.0031343	0	0	0.000427982	0.00267227	0.000840477	0.000462083	0.000976145	0.00237052	0.000620908
SPB6_PONAB Serpin B6 OS=Pongo abelii GN=SERPINB6 PE=2 SV=1	0.00137885	0	0.000125676	0.00069808	0.0013887	0.000866472	0.00127696	0	0.000140385	0.00027468	0.000356633	0.00165185	0.00138096	0.000902236	0.00278914	0.00286924	0	0.00172669	0.00236327	0.00145387	0.00314888	0.00208815	0.00382813	0.00141844	0.000770327	0	0.00135712	0.00163672	0.0035222	0.00373993	0.00139283	0.00155428	0.00176749	0	0.000504477	5.27e-05	0.000269034	0.00131641	0.00176549	0.0020149	0.00073561	0.00332695	0.00101159	0.00152701	0.000560318	0.00123222	0.00158624	0.00412265	0.00496726
BLAST_ATPBM_MAIZE ATP synthase subunit beta, mitochondrial OS=Zea mays GN=ATPB PE=2 SV=1_P19023	4.75e-05	0.00103567	0.00125676	0.00069808	0.00013887	0.00196096	0.00219921	0.00101887	0.00157934	0.00027468	0	0.000340086	0.000644449	0.0007089	0.0013016	0.00109304	0.00177725	0.00074001	0.00168805	0.00284166	0.000461836	0.00372884	0.00102845	0.00162107	0.000154065	0.00177629	0.00148636	0.00201736	0.000130452	0.00110965	0.000749987	0.00047824	0.000577138	0.00135742	0.00113507	0.00279168	0.00511165	0.00179032	0.00140022	0.000767582	0.00386195	0.00161307	0.00284025	0.00133613	0.00117667	0.0020537	0.000732109	0.00247359	0.000338677
BLAST_TPIS_PEDPA Triosephosphate isomerase OS=Pediococcus pentosaceus (strain ATCC 25745 / CCUG 21536 / LMG 10740 / 183-1w) GN=tpiA PE=3 SV=1_Q03GW6	0.00128376	0.00212888	0.00175946	0.00279232	0.000601768	0.0012313	0.00120602	0.00194071	0.00354473	0.0021425	0.00118878	0.00364378	0.0012889	0.00128891	0.0039048	0.00245935	0.00207346	0.000863345	0.000675219	0.00185038	0	0.000186442	0.00131414	0.000283688	0.000924392	0.00458874	0.00168024	0.000761267	0.000304388	0.00184942	5.36e-05	0.00155428	0.00115428	0.00142703	0.00163955	0	0.000403551	0.00131641	0.00255692	0.00086353	0.00147122	0.000957758	0.000544705	0.00152701	0.00212921	0.000718797	0.00353853	0.00149446	0.000112892
GP2_HUMAN Pancreatic secretory granule membrane major glycoprotein GP2 OS=Homo sapiens GN=GP2 PE=2 SV=3	0	0.00397008	0.00125676	0	0	0.00214338	0.00170261	0.000679249	0.000140385	0.00159314	0.000356633	0.000777341	9.21e-05	0	0.000743771	0.000409892	0.00177725	0.00370005	0	0.00158604	0.00033588	0.00201357	0.000228545	0.000121581	0.00107846	0.00261509	0	7.61e-05	0.00204375	0	0.00219639	0.00101626	0	0.00261042	0.00132425	0.000632078	0.00174872	0.00126376	0	0.00159913	0.00616073	0.0012098	0.00342386	0	0.00117667	0.00338861	0.000793118	0.00365885	0
BLAST_ADH1_CLOSA NADPH-dependent butanol dehydrogenase OS=Clostridium saccharobutylicum GN=adh1 PE=3 SV=1_P13604	0.000760746	0.000690449	0.00263919	0.000465387	0.000740638	0.00141372	0.00113507	0.00528844	0.00329906	0.00357084	0.000475511	0.00364378	0.00285399	0.00154669	0.00167348	0.0017762	0.00187599	0.00024667	0.00101283	0.00151996	0.000545806	0.00123052	0.000399954	0.000324215	0.000231098	0.00419401	0.000387747	0.000152253	0.000739227	0.00271248	5.36e-05	5.98e-05	0.000432854	0.00452473	6.31e-05	0.000632078	0	0.000210626	0.000487033	0.000831548	0.00318764	0.00509124	0.00015563	0.000381752	0.00212921	0.00020537	0.00207431	0.000772997	0.000395123
SCONB_ARTOC Probable E3 ubiquitin ligase complex SCF subunit sconB OS=Arthroderma otae (strain ATCC MYA-4605 / CBS 113480) GN=sconB PE=3 SV=1	0.000618106	0.000690449	0.000439864	0.00139616	0.00124983	0.000319227	0.000248297	0.000291107	0.000245674	0.000219744	0.000356633	0.000291503	0.000736513	0.000257782	0	0.000136631	0.000296209	0.000123335	0	0.0013217	0.00222521	0.000149154	0.00217118	0.00101317	0.00142511	0.00133222	0.00258498	0.00247412	0.00247858	0.00242479	0.000374993	0.00167384	0.00126249	0.00031325	0.00340522	0.00263366	0	0.00115844	0.00194813	0.00159913	0.00214553	0.00090735	0.00046689	0	0.00117667	0.00143759	0.00170826	0.000103066	0.000564462
11S2_SESIN 11S globulin seed storage protein 2 OS=Sesamum indicum PE=2 SV=1	0	0.00258918	0	0	0.00268481	0	0	0.000388142	0	0	0	0	0	0.0224915	0	0.000273261	0.000789889	0	0	0.000859107	0	0.000149154	0	0.00336373	0	9.87e-05	0	0	0	0	5.36e-05	0.0115973	0	0	0	0	0.00874361	0	0	0	0	0	0.00474671	0	0	0.000513426	0	0.0118526	0
BLAST_FUCI_BACFR L-fucose isomerase OS=Bacteroides fragilis (strain YCH46) GN=fucI PE=3 SV=1_Q64ZS4	0.003566	0.00178366	0.000188513	0.00069808	0.000740638	0.000866472	0.00163167	0.00145553	0.000245674	0.00203263	0.00130766	0.00170043	0.000920641	0.00135335	0.000371885	0.00150294	0.00187599	0.00148002	0.00202566	0.000660851	0	0.000335595	0.00148555	4.05e-05	0.00161769	0.00212168	0.000323123	0.00137028	0.000478323	0.00505507	0	0.00161406	0.000541067	0.00111378	0.000630597	0.00200158	0	0.000789848	0.0026178	0.00278249	0.00128732	0.00272205	0.000350167	0.00496278	0.00218524	0.00097551	0.00250137	0.000309199	0.000564462
BLAST_CEAM5_HUMAN Carcinoembryonic antigen-related cell adhesion molecule 5 OS=Homo sapiens GN=CEACAM5 PE=1 SV=3_P06731	0.000903385	0.00103567	0.000502702	0.00279232	0.00124983	0.000456038	0.00148978	0.000776285	0.00136876	0.000219744	0.00142653	0.000437254	0.00046032	0.0007089	0.000557828	0.00218609	0.000493681	0.00172669	0.00236327	0.00211472	4.2e-05	0	0.00154268	0.000932118	0.0025806	0.000789461	0.00109862	0.00068514	0.000695743	0.000698668	0.000535705	0.00107604	0.00155106	0.00055689	0.00138731	0	0.00147969	0.000842504	0.00164374	0.000959478	0.000919512	0.00100817	0.00159521	0.00324489	0.000840477	0.00128356	0.000549082	0.00242206	0.00152405
BLAST_MEP1A_HUMAN Meprin A subunit alpha OS=Homo sapiens GN=MEP1A PE=1 SV=2_Q16819	0.00028528	0	0.000816891	0	0.00115725	0.0012313	0.000638479	0.00101887	3.51e-05	0.0027468	0.000594389	0.000728757	0.000828577	0.000773345	0.000185943	0.000273261	0.0035545	0.000616675	0	0.00218081	4.2e-05	0.000596614	0.0018855	0.00145897	0.00107846	0.00212168	0	0.000266443	0	8.22e-05	0.00289281	0.00424438	0	0	0.00163955	0.000421385	0	0.00215892	0	0.000255861	0.00211488	0.000100817	0.00046689	0.0047719	0	0.0027725	0.000793118	0.000927596	0.000112892
BLAST_PNP_SULAA Polyribonucleotide nucleotidyltransferase OS=Sulfurihydrogenibium azorense (strain Az-Fu1 / DSM 15241 / OCM 825) GN=pnp PE=3 SV=1_C1DTW6	0.000760746	0.00212888	0.00138243	0.00186155	0.000509189	0.000912076	0.0015962	0.000824802	0.00301828	0.00120859	0.000951022	0.00223485	0.00165715	0.0014178	0.00111566	0.000683153	0.000691153	0.00024667	0.000168805	0.00118953	0	0	0.00159982	0.000364742	0.000539229	0.00281245	0.00161561	0.000152253	8.7e-05	0.00205491	0	0.00101626	0.00126249	0.00285406	0.00145037	0	0.000134517	0.00136907	0.00316571	0.00156715	0.00119537	0.00171388	0.00062252	0	0.000784446	0.000616111	0.00256238	0.00123679	0.00112892
RS3_AGARV 30S ribosomal protein S3 OS=Agathobacter rectalis (strain ATCC 33656 / DSM 3377 / JCM 17463 / KCTC 5835 / VPI 0990) GN=rpsC PE=3 SV=1	0.00266261	0.00241657	0.000879729	0.00116347	0.00111096	0.00150493	0.00145431	0.00194071	0.00175482	0.00203263	0.000832145	0.00184618	0.00147302	0.00367339	0.00167348	0.0035524	0.00454186	0.00185002	0.00489534	0.000726936	0.00025191	0.000372884	0.00137127	4.05e-05	0.000654778	0.00192431	0.000516996	0.00102771	0.000260904	0.00065757	0.000696416	0.00191296	0.000901778	0.00118339	0.00163955	0.000316039	0.000269034	0.00100047	0.000791428	0.000639652	0.00122602	0.000957758	0.000427982	0.00133613	0.0010646	0.000924167	0.00128119	0.00164906	0.000451569
BLAST_ASAH2_HUMAN Neutral ceramidase OS=Homo sapiens GN=ASAH2 PE=1 SV=2_Q9NR71	0.00318562	0.00166858	0.000816891	0.00104712	0.00342545	0.00209778	0.00148978	0.00213478	0.000456252	0.00109872	0.000237756	0.00160326	0.00119683	0.000773345	0.00278914	0.00396229	0.0021722	0.00259004	0.00219446	0.000396511	0.00218322	0.00111865	0.00119986	0.00125633	0.00150214	0.000444072	0.00109862	0.00140834	0.0010871	0.000287687	0.000964268	0.00095648	0.000468925	0.000348056	0.00107201	0.000737424	0.000269034	0.00015797	0.000791428	0.00124732	0.00076626	0.00166347	0.00120613	0.000763504	0.000448255	0.00200236	0.00103716	0	0.00124182
CH60_KLEAK 60 kDa chaperonin OS=Klebsiella aerogenes (strain ATCC 13048 / DSM 30053 / JCM 1235 / KCTC 2190 / NBRC 13534 / NCIMB 10102 / NCTC 10006) GN=groL PE=3 SV=2	0.00014264	0.00149597	0.00119392	0.000232693	4.63e-05	0.00127691	0.000851305	0.00130998	0.00280771	0.000604296	0	0.000777341	0.00294605	0	0	0.000136631	0	0	0.000844024	0.000859107	0.000419851	0.00432545	0	0.000851064	0.00223395	0.00251641	0.000581621	3.81e-05	0	0.00258918	0.00208925	0.00131516	0.000973921	0.00100936	0.000189179	0.00695286	0.00712941	0.00142173	0.000730549	3.2e-05	0.00079691	0.00297409	0.000739242	0	0.0026335	0.000718797	0.00158624	0.00170059	0
Metagenome unknown	0	0.00109321	0	0.00593368	0.00129612	0.00145932	0.000390182	0	0.0057207	0.0041202	0.000951022	0.00378954	0.00635242	0.00251337	0	0.000956415	0.000888626	0.00234337	0.000675219	0.00303991	0	0.000522037	0	0.000445795	0	0.000986826	0.00252036	0	0	0.00127404	0	0	0	0	0	0	0.00242131	0.000421252	0.00322659	0	0	0.000403266	0.000933779	0	0.00504286	0.000564769	0.00506375	0.00376192	0
ZG16_HUMAN Zymogen granule membrane protein 16 OS=Homo sapiens GN=ZG16 PE=1 SV=2	0.00137885	0.000747986	0.0010054	0.000232693	0.00143499	0.000684057	0.000815834	0.000582213	3.51e-05	0.00054936	0	0.000485838	0.000184128	6.44e-05	0.000185943	0.000136631	0.000789889	0.00135669	0.000675219	0.00165213	0.000503821	0.00108136	0.00159982	0.00360689	0.00204137	0.00123353	0.00116324	0.000190317	0.000913163	0.00193161	0.000214282	0.0005978	0.000577138	0.00177509	0.00157649	0.00121148	0.000134517	0.00100047	0.00103495	0.000703617	0.000888862	0.00226837	0.00132285	0.000572628	0.000280159	0.00112954	0.000305045	0.00319505	0.00254008
BLAST_RL7_LACP7 50S ribosomal protein L7/L12 OS=Lachnoclostridium phytofermentans (strain ATCC 700394 / DSM 18823 / ISDg) GN=rplL PE=3 SV=1_A9KJL7	0.000380373	0.000920598	0.00194797	0.000814427	0.000324029	0.000729661	0.000567537	0.00101887	0.00186011	0.000988848	0.00178317	0.0017976	0.00119683	0.000837791	0.000557828	0.0017762	0.000394945	0.00049334	0.00033761	0.00125562	0	0.00022373	0.00108559	0.000526849	0.000269614	0.00271377	0.00155099	0.00045676	0.000130452	0.00254808	0	0.00053802	0.000504996	0.00233198	0.00113507	0	0.000807103	0.000684535	0.00365275	0.000383791	0.00220683	0.000655308	0.000583612	0.000572628	0.000952541	0.000616111	0.00481972	0.00103066	0.0007338
BLAST_PA21B_HUMAN Phospholipase A2 OS=Homo sapiens GN=PLA2G1B PE=1 SV=3_P04054	0.000760746	0.00310702	0.00106824	0.00232693	0.000879507	0.00095768	0.00099319	0.00087332	0.00119328	0.000878976	0.000713267	0.00102026	0.00220954	0.00109557	0.00241726	0.00232272	0.00207346	0.00111002	0.00202566	0.000462596	0.00218322	0.000149154	0.0006285	0.00064843	0.000924392	0.00128287	0.000258498	0.000532887	0.000826195	0.000821963	0.00101784	0.00131516	0.00198391	0.000591695	0.00100895	0.000210693	0.00188324	0.000368596	0.00164374	0.000831548	0.00134862	0.000856941	0.000544705	0.000572628	0.00128873	0.000821482	0.00103716	0.00082453	0.00112892
BLAST_CUZD1_HUMAN CUB and zona pellucida-like domain-containing protein 1 OS=Homo sapiens GN=CUZD1 PE=2 SV=1_Q86UP6	0.00161658	0.00235903	0.00119392	0.00139616	0.0013887	0.00150493	0.000815834	0.00126146	0.000315867	0.00054936	0.00118878	0.000583005	0.00119683	0.00154669	0.000371885	0.00204946	0.00128357	0.00074001	0.000844024	0.000726936	0.00155345	0.00100679	0.00114273	0.000202634	0.00115549	0.000345389	0.00161561	0.00140834	0.00208723	0.000534276	0.00149997	0.00304878	0.000216427	0.00146184	0.00176567	0.00100079	0.000269034	0.000684535	0.00121758	0.00150318	0.00107276	0.000806533	0.000855965	0.00190876	0.00128873	0.00102685	0.00115917	0.00103066	0.000677354
BLAST_CRT_CLODI Short-chain-enoyl-CoA hydratase (Fragment) OS=Clostridioides difficile GN=crt PE=3 SV=1_P45361	0.000523013	0.00281933	0.002325	0.00127981	0.000509189	0.00264502	0.00216373	0.00252293	0.00270242	0.00148327	0	0.00223485	0.00257779	0.000902236	0.000371885	0.00136631	0.00345577	0.000863345	0.00135044	0.0013217	0	0.000745768	0.00114273	0.00064843	0	0.00360191	0.000258498	0	0	0.000246589	0	0.0008967	0.000541067	0.00194911	0.00107201	0	0.000538068	0.000947817	0.00286132	0.000191896	0.00147122	0.00136102	0.00120613	0	0.000784446	0.000821482	0.00231834	0.00133986	0.00169338
LEGB_GOSHI Legumin B OS=Gossypium hirsutum GN=LEGB PE=2 SV=1	0.0137885	0	0	0	0.000231449	0	0	0	0	0	0	0	0	0	0	0	0	0.00024667	0	0.036479	0	0	0	0	0	0	0	0	0	0	0	0.0002989	0.00396783	0.000487279	0	0	0	0	0.000243516	0	0	0	0	0	0.0142881	0	0.00140321	0	0
ACT23_DICDI Putative actin-23 OS=Dictyostelium discoideum GN=act23 PE=1 SV=1	0.00118866	0.000632911	0.000125676	0.000232693	0	0.000866472	0.000851305	0.000291107	0.00150914	0.000219744	0.000356633	0.000340086	0	0.000966682	0.000185943	0	0.000592417	0.00049334	0.00033761	0.00013217	0.00033588	0.000820345	0.0006285	0.00405269	0.000808843	0.00152958	0.00103399	0.00178898	0.000304388	0.000575374	0.00257138	0.00011956	0.000360711	0.000452473	0.000315298	5.27e-05	0.00161421	0.000579222	0	0.000159913	0.00104211	0.000504083	0.000700335	0.00114526	0.000728414	0.00231042	0.000183027	0.00401958	0.000282231
BLAST_TTHY_HUMAN Transthyretin OS=Homo sapiens GN=TTR PE=1 SV=1_P02766	0.000380373	0.000115075	6.28e-05	0.000814427	4.63e-05	0.000228019	0	0.000194071	0.0028428	0.00302148	0.00166429	0.00257494	0.000184128	0.00109557	0.000929714	0.000683153	0	0.00209669	0.00101283	0.00026434	0.0011336	0.000372884	0.00119986	0.000202634	0.00173324	0	0.000258498	0.000989647	0.0024351	0.00168502	0.00155354	0.00304878	0.0016232	0	0.00100895	0.00110614	0.00188324	0.00179032	0.000487033	0.00105543	0	0.000705716	0	0.00190876	0.000560318	0	0	0.00154599	0.00541883
Metagenome unknown	0	0.000747986	0.00728918	0	0.00152757	0.00387632	0.00117055	0.0113532	0.00638753	0.000769104	0.000118878	0.00466404	0.00441908	0.000837791	0	0.00150294	0.00375197	0.0024667	0.00033761	0.00026434	0	0.00164069	0.000742772	0.00109423	0	0.000789461	0	0	0	0.00143844	0	0.00017934	0	0.00167067	0.000882835	0	0	0.000105313	0.000121758	0.000319826	0.000214553	0.0012098	0.000505797	0	0.000448255	0.00112954	0.0013422	0.000103066	0
BLAST_COOS1_METAC Carbon monoxide dehydrogenase 1 OS=Methanosarcina acetivorans (strain ATCC 35395 / DSM 2834 / JCM 12185 / C2A) GN=cooS1 PE=3 SV=1_Q8TKW2	0.00503994	0.0023015	0.000377027	0.00116347	0.00203675	0.00100328	0.00141884	0.00116443	0.00143895	0.00186782	0.0010699	0.0035952	0.00101271	0.00225559	0.00371886	0.00327914	0.00187599	0.00123335	0.00270088	0.000330426	0	0.000149154	0.00142841	0	0.000577745	0.00251641	0	0.000190317	4.35e-05	0.00254808	0	0.00041846	0.00104606	0.00233198	0.000756716	0	0	0.000315939	0.00194813	0.00108741	0.000827561	0.000655308	7.78e-05	0.000190876	0.000896509	0.000513426	0.00170826	0.000206132	0
BLAST_PANP_VIBF1 Aspartate 1-decarboxylase OS=Vibrio fischeri (strain ATCC 700601 / ES114) GN=panP PE=1 SV=1_Q5E6F9	0.00109357	0.000805524	0.000502702	0.00255963	0.00106467	0.0011857	0.000603008	0.000630731	0.000245674	0.00054936	0.000475511	0.000971676	0.00248573	0.0007089	0.00111566	0.000683153	0.00148104	0.00049334	0.00118163	0.00125562	0.000881686	0.00022373	0.00142841	0.00077001	0.000885876	0.00123353	0.00135712	0.00091352	0.00100013	0.000780865	0.00107141	0.00131516	0.00064928	0.000765723	0.00195485	0.00100079	0.000538068	0.00131641	0.00127846	0.000671635	0.000674309	0.0012098	0.000700335	0.00190876	0.00100857	0.00102685	0.00128119	0.000412265	0.00152405
BLAST_ADHE_ECOLI Aldehyde-alcohol dehydrogenase OS=Escherichia coli (strain K12) GN=adhE PE=1 SV=2_P0A9Q7	0.00218714	0.000575374	0.000502702	0.00034904	0.00106467	0.000592849	0.00113507	0.00169812	0.000456252	0.000769104	0.000356633	0.000777341	0.00110477	0.000966682	0.000371885	0.000409892	0.000789889	0.00049334	0.0035449	0.00026434	0.000209925	0.00753225	0	0.000243161	0.000346647	0.00152958	6.46e-05	0.000494823	0.000304388	0.00279467	0.000321423	0	0	0.00132261	0.000315298	0.00716355	0.00430455	0.000210626	6.09e-05	0.000415774	0.00239073	0.00443593	3.89e-05	0.000763504	0.00341794	0.000154028	0.000732109	0.000154599	5.64e-05
BLAST_RPOC_BACTN DNA-directed RNA polymerase subunit beta OS=Bacteroides thetaiotaomicron (strain ATCC 29148 / DSM 2079 / NCTC 10582 / E50 / VPI-5482) GN=rpoC PE=3 SV=1_Q8A470	0.00147394	0.00126582	0.000314189	0.00069808	0.000416609	0.00136811	0.000283768	0.00160109	0.00126347	0.00120859	0.000951022	0.000680173	0.00174922	0.00109557	0.0013016	0.00150294	0.00236967	0.00160336	0.00219446	0.00105736	0.000629776	0.00272205	0.000742772	0.000364742	0.000346647	0.00157892	0.000193874	0.000951583	0.000739227	0.000123294	0.000321423	0.00071736	0.000757494	0.00087014	0.00113507	0.00168554	0.000807103	0.000789848	0.000791428	0.000415774	0.00220683	0.00141143	0.00229554	0.000572628	0.000728414	0.00133491	0.000854127	0.00128833	0.000564462
BLAST_PFP_SPITD Pyrophosphate--fructose 6-phosphate 1-phosphotransferase OS=Spirochaeta thermophila (strain ATCC 49972 / DSM 6192 / RI 19.B1) GN=pfp PE=1 SV=1_Q9EZ02	4.75e-05	0.000402762	0.00226216	0	0.000324029	0.00506202	0.004292	0.000145553	0.000315867	0.00027468	0	0.00116601	9.21e-05	0.000193336	0.000185943	0.000136631	0.000197472	0.00431672	0	0.000859107	0	0.00686106	0.00114273	0.00186423	0.000385164	0.000937485	0.000193874	0	0	0.000123294	0	0	0.000360711	0.00153145	0.00189179	0	0.00134517	0.00110579	0.000304395	0.000479739	0.00692699	0.00126021	0.00688662	0	0.000224127	0.00390204	0.000549082	0.00159753	0.00169338
BLAST_KDGK_THET8 2-dehydro-3-deoxygluconokinase OS=Thermus thermophilus (strain HB8 / ATCC 27634 / DSM 579) GN=kdgK PE=1 SV=1_Q53W83	9.51e-05	0.000632911	0.0010054	0.000116347	0.000324029	0.00164174	0.0018445	0.00145553	0.000947601	0.000164808	0.000118878	0.000485838	0.000644449	0.00103113	0.000929714	0.00232272	0.00128357	0.00222003	0.00253207	0.000396511	4.2e-05	0.00190171	0.000857045	0.00133739	0.000231098	0.00212168	0.000775494	0.00034257	0.001348	4.11e-05	0	0.00071736	7.21e-05	0.00177509	0.00157649	0.000790097	0.00147969	0.000947817	0.00200901	0.000607669	0.00125667	0.000554491	0.00151739	0.000763504	0.000952541	0.00251579	0.00128119	0.00118526	0.0007338
BLAST_ACSE_MOOTH 5-methyltetrahydrofolate:corrinoid/iron-sulfur protein co-methyltransferase OS=Moorella thermoacetica GN=acsE PE=1 SV=2_Q46389	0.00152149	0.0013809	0.00106824	0.00197789	0.000231449	0.00168734	0.00198638	0.00121294	0.00200049	0.00164808	0.000594389	0.00296361	0.00110477	0.000837791	0.000371885	0.000409892	0.000987362	0.00024667	0.000168805	0.000528681	0	0.000111865	0.00154268	0.000526849	0.000616262	0.00251641	0.00071087	0.000609013	0	0.00160283	0	0.00155428	0.000432854	0.00288887	0.000567537	0	0.000403551	0.00115844	0.00371362	0.000607669	0.00199228	0.000957758	0.000389075	0.000572628	0.000728414	0.000256713	0.00286743	0.000257666	5.64e-05
CEL2A_MOUSE Chymotrypsin-like elastase family member 2A OS=Mus musculus GN=Cela2a PE=1 SV=1	0.000475466	0	0	0.00186155	0.000555478	0	0.000141884	0	0	0	0	0	0	0	0.00185943	0	0	0	0.00286968	0	0.00272903	0	0.000228545	0	0.000115549	0	0.00142174	0.0064327	0.00482672	0	0.00176783	0.00047824	0.000829636	0	0	0.00158019	0	0.00015797	0.0011567	0.00562894	0	0	0	0.00305402	0.0012327	0	0	0	0
BLAST_LACE_RHIRD Lactose-binding protein OS=Rhizobium radiobacter GN=lacE PE=1 SV=1_P29822	0.00109357	0.0013809	0.00194797	0.00290867	0.000648058	0.000501642	0.00099319	0.000679249	0.00214088	0.000164808	0.000356633	0.00262352	0.00257779	6.44e-05	0.000371885	0.00191283	0.000987362	0.000616675	0.00033761	0.000793021	0	3.73e-05	0.000914181	0	0.000577745	0.00305916	0.000258498	0	0	0.00291797	0	0.0017934	0.000216427	0.00365459	0.000630597	0	0.000538068	0.000947817	0.00395714	0.00172706	0.000888862	0.00146184	0.000505797	0	0.000896509	0.000359398	0.00433165	0.000154599	0.0007338
BLAST_TPIS_BACTN Triosephosphate isomerase OS=Bacteroides thetaiotaomicron (strain ATCC 29148 / DSM 2079 / NCTC 10582 / E50 / VPI-5482) GN=tpiA PE=3 SV=1_Q8A0U2	0.000237733	0.000460299	0.00219932	0.000581734	0	4.56e-05	0.000390182	0.00043666	0.000807216	5.49e-05	0.000118878	0.00174902	9.21e-05	0.000386673	0.00111566	0.000819784	0.000296209	0	0.00135044	0.0013217	0	3.73e-05	0.00194264	0.000526849	0.00281169	0.0016776	0.00187411	0.00137028	0.00200026	0.0022193	0.000160711	0.00041846	0.00119035	0.00226237	0.000189179	0.00121148	0.000269034	0.000737191	0.00103495	0.0022068	0.000122602	0.00166347	0.00015563	0.000190876	0.00134476	0.000667454	0.00183027	0.000721464	0.00135471
BLAST_ACE_MESAU Angiotensin-converting enzyme OS=Mesocricetus auratus GN=Ace PE=2 SV=1_Q50JE5	0.000427919	0	0	0.000465387	0.000555478	0.00191536	0.0015962	0	0.00038606	0.000769104	0.000237756	0.000485838	0.00046032	0.00116002	0	0.000546523	0	0.00098668	0.00033761	0.000660851	0	0.00164069	0.00245686	0.000972644	0.000231098	0	0.00252036	0.00213155	0	0	0.00123212	0.00173362	0	0	0.00119813	0.000105346	0	0.00273814	0	0.000383791	0.00079691	0	0	0.00629891	0	0	0	0.00216439	0.000225785
SBP1_PONAB Selenium-binding protein 1 OS=Pongo abelii GN=SELENBP1 PE=2 SV=1	0.00161658	0	0.000377027	0.000581734	0.00203675	0.00209778	0.00120602	9.7e-05	0.000491349	0.000659232	0.000237756	0.000194335	0.000368256	0.000515564	0.00241726	0.000683153	0	0.0028367	0.000675219	0.00138779	0.00109161	0.00137967	0.00171409	0.00125633	0.00269615	0.000246706	0.000387747	0.00022838	0.00130452	0.00246589	0.000160711	0.00197274	0.000432854	6.96e-05	0.000378358	0.000105346	0.000269034	0.000526565	0.000365275	0.000703617	0.000306504	0.00393185	0	0.00152701	0.000336191	0.00200236	0.000976145	0.00237052	0.00191917
BLAST_TPIS_LACP7 Triosephosphate isomerase OS=Lachnoclostridium phytofermentans (strain ATCC 700394 / DSM 18823 / ISDg) GN=tpiA PE=3 SV=1_A9KPF8	0.000855839	0.0013809	0.000942566	0.00197789	0.000416609	0.00127691	0.00117055	0.000679249	0.00115818	0.00109872	0.00118878	0.00199193	0.000644449	0.000773345	0.00278914	0.0017762	0.000987362	0.000863345	0.000844024	0.000925192	0	0	0.00137127	0.000243161	0.000654778	0.00236838	0.000840119	0.000761267	0.000260904	0.00119185	5.36e-05	0.00137494	0.00126249	0.00114858	0.00151343	0	0.000403551	0.00100047	0.00164374	0.0007356	0.000858211	0.00090735	7.78e-05	0.000763504	0.000840477	0.000667454	0.00164725	0.000360732	0.000112892
BLAST_MDH_BACTN Malate dehydrogenase OS=Bacteroides thetaiotaomicron (strain ATCC 29148 / DSM 2079 / NCTC 10582 / E50 / VPI-5482) GN=mdh PE=3 SV=1_Q8A0W0	0.000380373	0.000690449	0.000439864	0	9.26e-05	9.12e-05	0.00031924	0.00106739	0.00129857	0.000219744	0.000356633	0.00189477	0.00046032	0	0.0013016	0.00136631	0.000592417	0	0.00101283	0.000991277	0	0	0.00279968	0.000405268	0.00373609	0.00157892	0.00129249	0.000761267	0.00230465	0.00176722	0	0.00095648	0.00284962	0.002506	0.000567537	0.000368712	0	0.000368596	0.00164374	0.00278249	0.000122602	0.00146184	0	0	0.00145683	0.000410741	0.00146422	0.000876063	0.00237074
BLAST_IGJ_HUMAN Immunoglobulin J chain OS=Homo sapiens GN=JCHAIN PE=1 SV=4_P01591	0.000855839	0.00103567	0	0	9.26e-05	0.000592849	0.000922247	0.000824802	0.00101779	0.000988848	0.000951022	0.000583005	0.000644449	0.000257782	0.00167348	0.00109304	0.000987362	0.00074001	0	0.000396511	0.000587791	0	0.000457091	0.00308004	0.0023495	0.000838802	0.00142174	0.00068514	0.00186981	0.000287687	0.0023571	0.00041846	0.000721423	0.000835335	0.000567537	0.00189623	0.00134517	0.000368596	0.000243516	0.00118336	6.13e-05	0.000252042	0.0010505	0.00229051	0.000336191	0.00118088	0.000610091	0.00159753	0.000395123
S10A8_HUMAN Protein S100-A8 OS=Homo sapiens GN=S100A8 PE=1 SV=1	0.000237733	0.000172612	6.28e-05	0	0.000370319	0.000182415	7.09e-05	4.85e-05	0.000421156	0.000329616	0	0.000583005	0	0.000257782	0	0.000136631	0	0	0	0.000462596	0.000839701	0.000186442	0	0.00194529	0.00100143	0.000148024	0.000323123	0.000494823	0.00130452	0	0.0111427	0	0.00504996	0	0	0.000316039	0.000269034	0	6.09e-05	0.000191896	0.000183902	0	0.00459108	0.000381752	0	0.000462083	0	5.15e-05	0.00118537
XPP2_HUMAN Xaa-Pro aminopeptidase 2 OS=Homo sapiens GN=XPNPEP2 PE=1 SV=3	0	0.000517837	0	0	0	0.000182415	3.55e-05	0.000776285	0.000140385	0.00131846	0	4.86e-05	0.000276192	0.000386673	0	0.00109304	0.000394945	0	0.000506415	0.00112345	0.00180536	0.000335595	0.00114273	0.000932118	7.7e-05	0.000888143	0.00116324	0.00175091	0.00100013	0	0.00171426	0.00185318	0	0.000591695	0.00138731	0.00105346	0	0.0024222	0.000121758	0.00233473	0.00137927	0.000705716	0.00167302	0.00171788	0.000336191	0.00123222	0.000366055	0.00144293	0
BLAST_ETFB_CLOAB Electron transfer flavoprotein subunit beta OS=Clostridium acetobutylicum (strain ATCC 824 / DSM 792 / JCM 1419 / LMG 5710 / VKM B-1787) GN=etfB PE=3 SV=2_P52040	0	0.00224396	0.00119392	0.0017452	0.00013887	0.000592849	0.00127696	0.00160109	0.00266732	0.00225238	0.0010699	0.00238061	0.00211747	0.00219114	0.000929714	0.0017762	0.00118483	0.000370005	0.00033761	0.00204864	0	0.000186442	0.000457091	0	0	0.0037006	0.000775494	0	0	0.000410981	0	0.00071736	0.000685352	0.000661307	0.000315298	0	0.00094162	0.000263283	0.00188725	0	0.00101146	0.000403266	0.000427982	0	0.00117667	0.000718797	0.00176926	0.00283432	0
CBPA2_MOUSE Carboxypeptidase A2 OS=Mus musculus GN=Cpa2 PE=1 SV=1	0.00133131	0.00109321	0.000691215	0	0.00101838	0	0.000567537	9.7e-05	0.00136876	0	0.000951022	0	0	0.00315783	0.00185943	0.00245935	0.000394945	0.00024667	0.000675219	0	0.00537409	0	0	0	0.000808843	0	0.000516996	0.00392052	8.7e-05	0.000164393	0.00160711	0	0	0	0.00182873	0.000632078	0	0.000210626	0	0.00121534	0	0.000352858	0	0	0.000560318	0.000359398	0.00213532	0.000566864	0
ALL12_ARAHY Allergen Ara h 1, clone P41B OS=Arachis hypogaea PE=1 SV=1	0.000332826	0	0.00546689	0	0	0	0	0	0	0	0.0570613	0	0	0	0	0	0	0	0	0	0	0	0	0	0	0	0.000129249	0	0	0	0.00835699	0	0	0	0	0	0	0	0	0	0	0	0	0	0	0	0.00237936	0	0
BLAST_TAL_AGARV Probable transaldolase OS=Agathobacter rectalis (strain ATCC 33656 / DSM 3377 / JCM 17463 / KCTC 5835 / VPI 0990) GN=tal PE=3 SV=1_C4ZF71	0.000855839	0.000863061	0.00163378	0.00209424	0.000972087	0.00127691	0.00148978	0.00237737	0.00245674	0.00148327	0.000832145	0.00194335	0.000828577	0.00122446	0.000185943	0.00136631	0.000888626	0.00024667	0.00033761	0.000859107	0	0.000186442	0.000514227	0.000405268	0.000192582	0.00133222	0.000840119	0.000152253	0.00021742	0.00156173	5.36e-05	0.0008967	0.00064928	0.00194911	0.000630597	0.000210693	0	0.000473909	0.00249604	0.000639652	0.00131797	0.000403266	0.00031126	0.00114526	0.000672382	0.000256713	0.00195229	0.00128833	0.00118537
BLAST_OMPA_ESCF3 Outer membrane protein A OS=Escherichia fergusonii (strain ATCC 35469 / DSM 13698 / CDC 0568-73) GN=ompA PE=3 SV=2_B7LNW7	0	0	0	0	0	0	0.000106413	0.000339624	7.02e-05	0	0	0	0	0	0	0.000136631	0.000197472	0	0	0	0.00142749	0.00357968	0	4.05e-05	0.00219543	0	0.000129249	7.61e-05	0.000347871	0.00156173	0.000107141	0	0	0	6.31e-05	0.00589939	0.00847458	0.00189563	0	6.4e-05	0	0.00685553	0	0.000381752	0.0036981	0	0	0.000566864	0.000169338
Metagenome unknown	0	0.000805524	0.00131959	0.000465387	0	0.0011401	0.000638479	0.00106739	0.00105289	0.0013734	0.000475511	0.00102026	0.00110477	0.000515564	0.000371885	0.000409892	0.000691153	0.000123335	0.000506415	0.00151996	8.4e-05	0.000671191	0.000685636	0.0012158	0.000346647	0.000838802	0.00116324	0.000266443	0.000304388	0.00123294	0.000374993	0.00161406	0.000432854	0.00139222	0.00182873	0.000316039	0.00094162	0.00115844	0.00176549	0.000255861	0.00122602	0.00126021	0.00108941	0.000763504	0.000672382	0.00102685	0.00146422	0.00123679	0.00180628
BLAST_ALF_TREPA Fructose-bisphosphate aldolase OS=Treponema pallidum (strain Nichols) GN=fba PE=3 SV=1_O83668	0.000237733	0.00161105	0.00245067	0	0	0.00232579	0.0010996	9.7e-05	0.00249184	0.000769104	0	0.00267211	9.21e-05	0.000966682	0	0.000273261	0.000592417	0.00234337	0.000675219	0.000991277	0.000125955	0.00413901	0.00159982	0.00137791	0.000308131	0.00192431	6.46e-05	0	8.7e-05	0.000410981	0	0	0.00108213	0.00268003	0	0	0.00094162	0	0.000791428	0.00124732	0.00429106	0.00131062	0.00361839	0	0	0.000462083	0.000122018	0.00175213	0.00135471
BLAST_RL5_CLOK5 50S ribosomal protein L5 OS=Clostridium kluyveri (strain ATCC 8527 / DSM 555 / NCIMB 10680) GN=rplE PE=3 SV=1_A5N4Q9	0.000950932	0.00172612	0.000628378	0.00162885	0.00013887	0.000684057	0.00113507	0.00155257	0.00126347	0.00142834	0.00130766	0.00131176	0.0012889	0.00135335	0.00241726	0.00204946	0.00118483	0.00123335	0.000675219	0.000726936	0	0.000261019	0.00131414	0.000162107	0.000770327	0.00207233	0.000646245	0.000609013	0.00021742	0.000821963	0.000107141	0.00083692	0.000468925	0.000765723	0.000441418	0.000948117	0.000403551	0.000842504	0.00127846	0.0012793	0.000704959	0.000856941	0.00031126	0.00133613	0.00173699	0.000924167	0.00128119	0.00082453	0
BLAST_XYLA_BACV8 Xylose isomerase OS=Bacteroides vulgatus (strain ATCC 8482 / DSM 1447 / JCM 5826 / NBRC 14291 / NCTC 11154) GN=xylA PE=3 SV=1_A6L792	0.000475466	0.00023015	0.000942566	0.000581734	0.000231449	0	0.00138337	0.00043666	0.000175482	0.000439488	0.000237756	0.00131176	0.00046032	0.00341561	0.000743771	0.000273261	0.000789889	0	0.00168805	0.00191647	0	0	0.00279968	0.000121581	0.00042368	0.00138156	0.000840119	0.00011419	0.00126103	0.00139734	0	0	0.00104606	0.00212314	0.000630597	5.27e-05	0	0.000473909	0.000608791	0.00134327	3.07e-05	0.00337736	7.78e-05	0	0.000112064	5.13e-05	0.00152523	0.00139139	0.00112892
BLAST_Y4MM_SINFN Uncharacterized protein y4mM OS=Sinorhizobium fredii (strain NBRC 101917 / NGR234) GN=NGR_a02460 PE=3 SV=1_P55572	0	0.000747986	0.00314189	0.00127981	0.000833218	0.00150493	0.00127696	0.00179516	0.00252694	0.000329616	0.000237756	0.000971676	0.000736513	0.000580009	0	0.00163957	0.00227093	0.00098668	0.000168805	0.00026434	0	0.000820345	5.71e-05	0.00162107	0	0.000296048	0.000452372	0.00011419	0	0.000123294	0	0.0017934	7.21e-05	0.00180989	0.00195485	0	0.000134517	0.00115844	0.00499209	0	0.000275854	0.000151225	0.00140067	0	0.000112064	0.00143759	0.00195229	0.00164906	0.00254008
LG3BP_PONAB Galectin-3-binding protein OS=Pongo abelii GN=LGALS3BP PE=1 SV=1	0.000713199	0.0013809	0.000377027	0	0.00013887	0.00104889	0.0010996	0.000727767	0.000175482	0.000329616	0	0.000145751	0.000368256	0.000193336	0	0	0.000493681	0.00123335	0	0.000726936	0.000797716	7.46e-05	0.00154268	0.000851064	0.0023495	0.000444072	0.00103399	0.000494823	0.000826195	0.000698668	0.00214282	0.00047824	0.000216427	0.000417667	0.00138731	0.000210693	0	0.00115844	0.000182637	0.000703617	0.00073561	0.00090735	0.00101159	0.000572628	5.6e-05	0.000718797	0.000366055	0.00159753	0.000790246
BLAST_TRFL_HUMAN Lactotransferrin OS=Homo sapiens GN=LTF PE=1 SV=6_P02788	0	0	0	0	0	0	0	0	0	0.000329616	0	0.000971676	0	0	0	0	0	0	0	0.00026434	8.4e-05	0	0	0.00413374	0.000154065	0	0	0.00011419	0.000695743	0	0.0181604	0	0.0125888	0	0.000189179	0	0.000269034	0	0	0	0	0	0.000233445	0.000190876	0	0	0	0	0.0014676
BLAST_DHE4_CORGL NADP-specific glutamate dehydrogenase OS=Corynebacterium glutamicum (strain ATCC 13032 / DSM 20300 / JCM 1318 / LMG 3730 / NCIMB 10025) GN=gdh PE=1 SV=2_P31026	0.000950932	0.00120828	0.00125676	0.000814427	0.00296255	0.0011857	0.000354711	0.00223182	0.000807216	0.000988848	0.000118878	0.00131176	0.00156509	0.000773345	0	0.000819784	0.000394945	0.00024667	0.00219446	0.000726936	0	0.000708479	0.000457091	0.000445795	0.000577745	0.000937485	0.000646245	0.000304507	0	0.000493178	0.000321423	0.00071736	0.000577138	0.00407226	0.000693656	0.000105346	0.000403551	5.27e-05	0.000547912	0.000255861	0.000919512	0.00136102	0.00062252	0	0.00212921	0.000462083	0.00152523	0.00113373	0.000677354
BLAST_ETFA_CLOPR Acryloyl-CoA reductase electron transfer subunit beta OS=Clostridium propionicum GN=acrA PE=1 SV=1_G3KIM6	0.000332826	0.00247411	0.00276486	0	0.000416609	0.0035571	0.00124149	0.0021833	0.0047731	0.00120859	0	0.000971676	0.00294605	0.00103113	0.000185943	0.000683153	0.00434439	0.00148002	0.00151924	0.000198255	4.2e-05	0.000894921	0	0.000891591	0.000154065	0.00192431	0.000129249	0	0	0	0	0.0008967	7.21e-05	0.00208834	0.000441418	0	0.000403551	0.000263283	0.00164374	0	0.00186967	0	0.0015563	0	0.000448255	0.000513426	0.0013422	0.00206132	0
Metagenome unknown	0.0144542	0.00253165	0.000125676	0.00290867	0.00171273	0.000228019	0.000532066	0.000727767	0.000350963	0	0.000118878	0.00199193	0	0	0.00167348	0.000546523	0	0.00074001	0.00185685	0.000330426	0	0.000261019	0.000685636	0	0.00130956	0.000493413	6.46e-05	0	0	0.00480848	0	0.00167384	0	0.00361978	0.00208097	0	0	0	0.000487033	0.00118336	3.07e-05	0.00206674	0.0010505	0	0.0024654	0.000102685	0.000427064	0	0
PHSA_PHAVU Phaseolin, alpha-type OS=Phaseolus vulgaris PE=1 SV=1	0	0	0.000314189	0	0	0	0	0	0	0	0	0	0	0	0	0	0	0	0	0	0	0	0	0	0	0	0	0	0	0	0	0	0	0.00382862	0	0	0	0	0	0	0	0.000453675	0	0	0	0	0	0	0
BLAST_RPOB_PELTS DNA-directed RNA polymerase subunit beta OS=Pelotomaculum thermopropionicum (strain DSM 13744 / JCM 10971 / SI) GN=rpoB PE=3 SV=1_A5D5I2	0.000475466	0.000978136	0.00125676	0.00034904	9.26e-05	0.00104889	0.000425653	0.00106739	0.000631734	0.00104378	0.000594389	0.00102026	0.000184128	0.0007089	0.000557828	0.00122968	0.00187599	0.00209669	0.000675219	0.00145387	0.000209925	0.00201357	0.000571363	0.000567376	0.000462196	0.00108551	0.00071087	0.000837393	0.000130452	0.00045208	0.000214282	0.00035868	0.000541067	0.00194911	0.00100895	0.000210693	0.000672585	0.000789848	0.000487033	0.000639652	0.00254398	0.00110898	0.00143958	0.000381752	0.000280159	0.00112954	0.000732109	0.00170059	0.000395123
BLAST_GRCA_VIBCB Autonomous glycyl radical cofactor OS=Vibrio campbellii (strain ATCC BAA-1116 / BB120) GN=grcA PE=3 SV=1_A7MS83	0.00133131	0.00379747	0.00226216	0.00034904	0.000185159	0.000684057	0.000744892	0.00145553	0.00126347	0.00219744	0	0.00228344	0.00156509	0.000773345	0.00334697	0.000273261	0.00335703	0.00185002	0.00202566	0.00138779	0	0.00104407	0	0	0	0.00261509	0.000387747	0	0	0	0	0.00035868	0	0.000591695	0.00157649	0	0	0	0.000243516	0	0.000919512	0.00030245	0.00124504	0	0.000280159	0.0020537	0.00109816	0.00133986	0.0014676
BLAST_ENTK_HUMAN Enteropeptidase OS=Homo sapiens GN=TMPRSS15 PE=1 SV=3_P98073	0.000618106	0	0	0.00034904	0.000462899	0.000638453	0.00031924	0.000970356	0.000175482	0.000714168	0.000713267	0.000777341	0	0.00109557	0.00111566	0.000409892	0	0.00111002	0.00185685	0.000198255	4.2e-05	0.00100679	0.00211404	0.00077001	0.000654778	0.000838802	0.00148636	0.00034257	0.000695743	0.00135624	0	0.00304878	0.000685352	0	0.00176567	0.000579405	0	0.0012111	0.000791428	0.00105543	0.000429106	0.000352858	0.000661427	0.00152701	0.0014008	0.000616111	0.00158624	0.000979129	0
BLAST_PHK_BIFA0 Probable phosphoketolase OS=Bifidobacterium animalis subsp. lactis (strain AD011) GN=BLA_1483 PE=3 SV=1_B8DUT6	0.00014264	0.00397008	0.00144527	0.000581734	0.00268481	0.00232579	0.0053916	0.00116443	0.00196539	0.000988848	0.000118878	0	0.00220954	0.00541342	0.000185943	0	0.00118483	0.00172669	0.00033761	0.000726936	0	0.000149154	0.003771	0	0.00042368	0.000888143	0.00187411	0.00022838	0	0	5.36e-05	0.0008967	0.00133463	0.00031325	0.00498171	0	0	0.00147438	0.000487033	0	0	5.04e-05	0	0	0	0	0.00122018	0	0
BLAST_ETFA_CLOAB Electron transfer flavoprotein subunit alpha OS=Clostridium acetobutylicum (strain ATCC 824 / DSM 792 / JCM 1419 / LMG 5710 / VKM B-1787) GN=etfA PE=3 SV=2_P52039	0	0.000345224	0.00106824	0.00267597	4.63e-05	0.000456038	0.00148978	0.000339624	0.00529955	0.00192276	0.000356633	0.00184618	0.00239367	0.00225559	0.000185943	0	0.000888626	0	0	0.0017843	0	7.46e-05	0.000514227	0	0	0.00305916	0.000840119	0	0	0.000821963	0	0.00083692	0.000504996	0.00031325	0.000693656	0	0	0	0.00194813	3.2e-05	0.00177772	5.04e-05	0.000233445	0	0.0010646	0.000256713	0.00213532	0.00283432	0
BLAST_LIPO_BACSU Lipoprotein LipO OS=Bacillus subtilis (strain 168) GN=lipO PE=1 SV=1_P37966	0	0.00115075	0.00408445	0.00279232	9.26e-05	0	0	0.00257144	0.00407117	0.00230731	0	0.000583005	0.00174922	6.44e-05	0.000557828	0.0017762	0.000789889	0	0.000675219	0.00171821	0	0	0.000171409	0	0	0.00128287	0.000904743	0.00110384	0	0	0.000374993	0	0.000793565	0.000522084	0.000252239	5.27e-05	0	0.000315939	0	0.00140723	0.00232943	0	0	0	0.00296969	0	0.00219633	0.00206132	0
BLAST_UGPC_BARBK sn-glycerol-3-phosphate import ATP-binding protein UgpC OS=Bartonella bacilliformis (strain ATCC 35685 / KC583) GN=ugpC PE=3 SV=1_A1URR2	0.00166413	0.00253165	0.0018223	0	0.00120354	0.00273623	0.00148978	0.00291107	0.00221107	0.00192276	0	0.00116601	0.00211747	0.0014178	0	0.0017762	0.00503554	0.00185002	0.00219446	0.000462596	0	0.000894921	0	0.000405268	0	0.0016776	0.000129249	0	0	0	0	0.0002989	3.61e-05	0.00146184	0.00138731	0	0.000269034	0.000210626	0.00103495	0	0.00104211	0.00030245	0.000700335	0	0.000336191	0.000359398	0.00164725	0.00082453	0.000225785
BLAST_KCRU_HUMAN Creatine kinase U-type, mitochondrial OS=Homo sapiens GN=CKMT1A PE=1 SV=1_P12532	0.00128376	0.000460299	0.000502702	0.00034904	0.00111096	0.000684057	0.000638479	0.000291107	0.00115818	0.000439488	0	0.000923092	0.000736513	6.44e-05	0.000557828	0	0	0.00098668	0	0	0.00100764	0.00100679	0.00165695	0.0022695	0.000308131	0.000197365	0.00898281	0.00182704	0.000565291	0.000575374	0.000696416	0.00047824	0	0.000382862	0.000504477	5.27e-05	0	0.000947817	0	0.000959478	0.00113407	0.0006049	0.000427982	0.000190876	0.000448255	0.000102685	0.000854127	0.00154599	0.000790246
XYLA_BIFAA Xylose isomerase OS=Bifidobacterium adolescentis (strain ATCC 15703 / DSM 20083 / NCTC 11814 / E194a) GN=xylA PE=3 SV=1	0.00014264	0.00304948	0.00157094	0.00069808	0.00171273	0.00246261	0.00368899	0.00198923	0.00150914	0.00247212	0	0	0.00506352	0.00766901	0	0	0.000197472	0.000123335	0.00033761	0.00317209	0	0	0.00274254	0	0.000346647	0.000197365	0.00588083	0	0	0	0.000214282	0.00304878	0.00165927	0.000208834	0.00145037	0	0	0.000315939	0	0	0	0	0	0	0	0	0.000244036	0	0
Metagenome unknown	0.000427919	0.00120828	0.00119392	0.000581734	0.000231449	0.00109449	0.000780363	0.000679249	0.000982698	0.000878976	0.000832145	0.00111743	0.000920641	0.000966682	0.000929714	0.00109304	0.00118483	0.000370005	0.000506415	0.00118953	8.4e-05	0.000559326	0.000685636	0.000567376	0.00042368	0.00113485	0.00129249	0.000418697	0.000478323	0.000739767	0.000267852	0.00047824	0.000360711	0.000730918	0.00100895	0.000316039	0.00094162	0.000579222	0.00133934	0.000415774	0.000950162	0.000705716	0.000739242	0.000763504	0.000728414	0.000770139	0.000976145	0.000566864	0.000677354
BLAST_CDHR5_HUMAN Cadherin-related family member 5 OS=Homo sapiens GN=CDHR5 PE=1 SV=3_Q9HBB8	0.000808292	0	0.000754053	0.000814427	0.000324029	0.000638453	0.000390182	0.000970356	0.000456252	0.000219744	0.000356633	0.000291503	0.000920641	0.000837791	0	0.000819784	0	0.000123335	0.000506415	0.000991277	0.000881686	0.000298307	0.00205691	0.000729483	0.00100143	0.000493413	0.00200336	0.00129415	0.000608775	0.000821963	0.000749987	0.00257054	0.00064928	0	0.000630597	0.000421385	0.000672585	0.00152704	0.000243516	0.00108741	0.000214553	0.000705716	0.00046689	0.000572628	0.000560318	0.00148894	0.000854127	0.000876063	0.000225785
Metagenome unknown	0.00180677	5.75e-05	0.00175946	0	0.00101838	0	0	0	0	0	0	0.000437254	0.00239367	0.000193336	0	0	0	0	0.0070898	6.61e-05	0	0	5.71e-05	4.05e-05	0.00662481	0	0	0	0	0	0	0.00364658	0.00847672	0	0	0	0.000134517	0.000684535	0.00133934	0.00012793	0	0	0	0	0.00168096	0	0.00780916	0	0
BLAST_PRO7_ORYSI Prolamin PPROL 14E OS=Oryza sativa subsp. indica PE=3 SV=1_P0C5E5	0	0	0.000188513	0	0.000370319	0	0	0.000291107	0	0	0	0.00111743	0.00110477	0	0	0.00122968	0	0.000616675	0	0	0	0.00261019	0	0	7.7e-05	0.00241772	0	0	0.0179154	0.00127404	0	0	0.00194784	0.00271484	0	0	0.00538068	0.00100047	0	0	0	0.00287327	0.00299588	0	0	0.00308056	0.00176926	0	0.00598329
BLAST_RS7_EUBE2 30S ribosomal protein S7 OS=Eubacterium eligens (strain ATCC 27750 / VPI C15-48) GN=rpsG PE=3 SV=1_C4Z2R7	0.00137885	0.00132336	0	0.000814427	0.000370319	0.0012313	0.000851305	0.00237737	0.000947601	0.00219744	0.000356633	0.00131176	0.000276192	0.0021267	0.00167348	0.00150294	0.00138231	0.000123335	0.000168805	0.00026434	0.00016794	0.00022373	0.00119986	0.000202634	0.000962909	0.00152958	6.46e-05	0.000266443	0.000521807	0.00065757	0.000321423	0.00065758	0.000504996	0.000626501	0.000315298	0.000684751	0	0.000105313	0.000852307	0.00259059	0.00125667	0.000756125	0.000427982	0.00190876	0.00128873	0.000410741	0.00176926	0.000876063	5.64e-05
BLAST_PGK_BACTN Phosphoglycerate kinase OS=Bacteroides thetaiotaomicron (strain ATCC 29148 / DSM 2079 / NCTC 10582 / E50 / VPI-5482) GN=pgk PE=3 SV=1_Q8A753	0	0.000402762	0.000754053	0	4.63e-05	0.00232579	0.00156073	0.000194071	0.00108799	0	0	0.000437254	9.21e-05	0.000966682	0.000371885	0.00245935	0.000691153	0.00271337	0.000168805	0.000462596	0.000125955	0.00473563	0.00114273	0.000405268	0.000808843	0.000542754	0.000258498	7.61e-05	0	0	5.36e-05	0	0.000504996	0.00149664	0.00107201	0.000474058	0.00417003	0.000421252	0.000304395	0	0.00487341	0.00090735	0.00299588	0	0.000112064	0.000872824	0.0006711	0.000463798	0.000677354
Metagenome unknown	0	0	0	0.00593368	0.00259223	0	0.00117055	0.00169812	0	0.000109872	0.00404184	0.000825924	0	0	0	0.000683153	0.000987362	0	0.00033761	0	0	0	0.00159982	0.0010537	0	0	0	0	0	0.00160283	0	0	7.21e-05	0.000522084	0.00126119	0	0.00094162	0	0	0.000415774	0	0.00166347	0	0	0.000224127	0.000410741	0.00128119	0	0.0051366
BLAST_GNO_GLUOX Gluconate 5-dehydrogenase OS=Gluconobacter oxydans (strain 621H) GN=gno PE=1 SV=1_P50199	0.000523013	0.000690449	0.00125676	0	0.000324029	0.00100328	0.0015962	0.00160109	0.000701927	0.000439488	0	0.00165185	0.00101271	0	0.000371885	0.00136631	0.00365324	0.000616675	0.00219446	0.000925192	0	0.000559326	0.000799909	0.000486322	0.000654778	0.00172694	0.000387747	0.000380633	0	0.000534276	0.000803557	0	0.000360711	0.00132261	0.000630597	0	0.000134517	0.000263283	0.000791428	0.000319826	0.000459756	0.000756125	0.00046689	0	0.000560318	0.00133491	0.00213532	0.000927596	0.000564462
Metagenome unknown	0.000380373	0.000287687	0.000188513	0.000581734	0.000462899	0.000182415	0.000212826	0.000339624	0.000175482	0.000329616	0.000594389	0.000194335	0.000736513	0.000451118	0.000743771	0.000409892	0.000296209	0.00024667	0.000675219	0.000660851	0.00201528	7.46e-05	0.000514227	0.000324215	0.00042368	0.000345389	0.00116324	0.000532887	0.000826195	4.11e-05	0.000214282	0.00137494	0.000360711	0.000208834	0.0029638	0.00163287	0.000134517	0.000368596	0.00066967	0.000511722	0.000153252	0.0006049	0.000272352	0.000954381	0.00061635	0.000359398	0.000488073	0.000206132	0.000282231
Metagenome unknown	0	0.000575374	0.00527837	0	0	0.00300985	0	0.000679249	0.00175482	0.00120859	0	0.00393529	0.00414288	0.000193336	0.00557828	0.000956415	0.00128357	0.000616675	0.000675219	0.00284166	0	0.000298307	0.000399954	0.000202634	0	0.000542754	0.000193874	0.00011419	0	0.000986355	0	0.00011956	0.000144285	0.000487279	6.31e-05	0	0.000134517	0.000105313	0.000304395	0.000767582	0.000214553	0.00151225	7.78e-05	0	0.000784446	0.000513426	0.0013422	0.000154599	0.000169338
TGT_DEHMC Queuine tRNA-ribosyltransferase OS=Dehalococcoides mccartyi (strain CBDB1) GN=tgt PE=3 SV=1	0.000380373	0.000287687	0.000188513	0.000581734	0.000462899	0.000228019	0.000212826	0.000339624	0.000175482	0.000329616	0.000594389	0.000194335	0.000736513	0.000451118	0.000743771	0.000409892	0.000296209	0.000123335	0.000506415	0.000660851	0.00201528	7.46e-05	0.000571363	0.000324215	0.00042368	0.000345389	0.00109862	0.000609013	0.000869679	4.11e-05	0.000214282	0.00131516	0.00032464	0.000208834	0.00290074	0.00142217	0.000134517	0.000368596	0.00066967	0.000511722	0.000153252	0.000655308	0.00031126	0.00114526	0.00061635	0.000308056	0.000488073	0.000206132	0.000282231
BLAST_FTHS2_DESHY Formate--tetrahydrofolate ligase 2 OS=Desulfitobacterium hafniense (strain Y51) GN=fhs2 PE=3 SV=1_Q24ZZ8	0.00494485	0.00132336	0.000628378	0.000465387	0.00129612	0.00155053	0.0015962	0.00116443	0.000947601	0.00192276	0.00130766	0.00174902	0.00119683	0.00174003	0.00297508	0.00300587	0.000394945	0.00197336	0.00118163	0.00026434	0	0.000149154	0.000399954	0	0.00100143	0.00118419	0.000129249	0	0	0.00143844	0	0	0.00100999	0.00149664	0.000504477	0	0.000269034	0	0.00103495	0.000671635	0.000613008	0.00030245	7.78e-05	0.000381752	0.00061635	0.000308056	0.000122018	0.000103066	0
BLAST_GLPK_AGARV Glycerol kinase OS=Agathobacter rectalis (strain ATCC 33656 / DSM 3377 / JCM 17463 / KCTC 5835 / VPI 0990) GN=glpK PE=3 SV=1_C4ZGB4	0.00128376	0.00241657	0.00131959	0.000581734	0.000925797	0.00104889	0.000532066	0.00101887	0.00038606	0.000878976	0.000118878	0.00184618	0.00184128	0.000386673	0.000557828	0	0.000296209	0	0.00118163	0.000726936	0	0.000298307	0.000342818	8.11e-05	0	0.00148024	0	0	4.35e-05	0	5.36e-05	0	0.00173141	0.000417667	0.00151343	0	0	0.0012111	0.00450505	0	0.000582358	0.00110898	0.000855965	0	0.000728414	0.000564769	0.00213532	0.000979129	0.00203206
BLAST_PDUA_SALTY Propanediol utilization protein PduA OS=Salmonella typhimurium (strain LT2 / SGSC1412 / ATCC 700720) GN=pduA PE=1 SV=1_P0A1C7	9.51e-05	0.00115075	0.00119392	0.000465387	4.63e-05	0.000410434	0.000638479	0.000824802	0.000701927	0.000329616	0.0010699	0.000631589	9.21e-05	0.000451118	0.000371885	0.000683153	0.0010861	0.00049334	0.00033761	0.000396511	8.4e-05	0.000671191	0.000457091	0.00101317	0.00100143	0.00197365	0.000581621	0.00011419	0.000521807	0.000863061	0	0.00107604	0.000829636	0.000800529	0.000441418	0.000210693	0.000403551	0.000210626	0.000304395	0.000255861	0.00128732	0.00110898	0.000350167	0.00133613	0.000280159	0.000564769	0.000427064	0.000360732	0.000959585
BLAST_CLPB_LACPL Chaperone protein ClpB OS=Lactobacillus plantarum (strain ATCC BAA-793 / NCIMB 8826 / WCFS1) GN=clpB PE=3 SV=1_Q88VX7	0.000760746	0.000978136	0.000502702	0.00034904	0.000277739	0.0011401	0.00163167	0.000630731	0.00168462	0.000659232	0.000237756	0.000242919	0.000736513	0.000966682	0.000929714	0.000819784	0.00157978	0.00024667	0.00135044	0.000726936	0	0.00272205	0.000114273	0.000202634	0.000770327	0.000986826	6.46e-05	0.000152253	0.000173936	0.00045208	0.000267852	0.00035868	0.000216427	0.000382862	0.000252239	0.00484593	0.00928168	0.000368596	0	0.000191896	0.000214553	0.00146184	0.000427982	0.000381752	0.00218524	0.000359398	0.000122018	0.000772997	0
BLAST_YTFQ_ECOLI ABC transporter periplasmic-binding protein YtfQ OS=Escherichia coli (strain K12) GN=ytfQ PE=1 SV=1_P39325	0.00190186	0.00178366	0.00056554	0.00255963	0.00111096	0.000501642	0.000354711	0.000630731	0.000842312	0.000494424	0.0010699	0.00252636	0.00156509	0.000322227	0.000371885	0.000409892	9.87e-05	0.00024667	0.000168805	0.00171821	0	0	0.0006285	0	0	0.00128287	0.000516996	0.00022838	0	0.00065757	0	0.0002989	0.000901778	0.00177509	0.00170261	0	0	0.000579222	0.00182637	0.00185499	0.000337154	0.000100817	7.78e-05	0.000572628	0.00145683	5.13e-05	0.00323348	0.000103066	5.64e-05
Metagenome unknown	0	0	0	0.000232693	4.63e-05	0.0047884	0.000709421	0	0	0	0	0	0.000184128	0	0	0	0	0.00900345	0	0	0	0.00361697	0.000114273	0.00283688	0	0	0	0	0.00447885	0.0022193	0	0	0	0	0.00233321	0.000210693	0.000538068	5.27e-05	0	0	0.000459756	0	0.00610847	0	0	0.00415875	0	0	0
BLAST_CZCB_CUPMC Cobalt-zinc-cadmium resistance protein CzcB OS=Cupriavidus metallidurans (strain ATCC 43123 / DSM 2839 / NBRC 102507 / CH34) GN=czcB PE=1 SV=2_P13510	0.000237733	0	0	0.00034904	0.000185159	0	0.000248297	9.7e-05	7.02e-05	5.49e-05	0.000118878	0.000145751	0.000368256	0.000128891	0	0	0	0	0	0.00026434	0.0019733	0.000186442	0.00171409	0.00247214	0.00181027	4.93e-05	0.00116324	0.00235993	0.00226116	0.00242479	0.000589275	0.00083692	0.000468925	0	0.000630597	0.000790097	0	0.000737191	0.00066967	0.00175904	0	0.000554491	0.000350167	0	0.000560318	0.000513426	0.000305045	0.000257666	0.000338677
BLAST_CH60_BACV8 60 kDa chaperonin OS=Bacteroides vulgatus (strain ATCC 8482 / DSM 1447 / JCM 5826 / NBRC 14291 / NCTC 11154) GN=groL PE=3 SV=1_A6KXA0	9.51e-05	0.00115075	0.00301621	0.000116347	4.63e-05	9.12e-05	0.000709421	0.00130998	0.00421156	0.000164808	0	0.0030122	0.00184128	0.000128891	0	0.00109304	0.00128357	0.000370005	0.000506415	0.00211472	4.2e-05	0.000484749	0.0018855	0.000162107	0.00103994	0.000986826	0.00116324	0.000494823	8.7e-05	0.000369883	5.36e-05	0	0.000793565	0.00292367	0.000252239	0	0.000134517	0.00015797	0.000121758	0.00163111	0.000551707	0.00030245	0.000233445	0.000190876	0.00162492	0.000256713	0.00256238	0.000309199	0.000451569
BLAST_GLB63_ORYSJ 63 kDa globulin-like protein OS=Oryza sativa subsp. japonica GN=Os03g0663800 PE=1 SV=1_Q75GX9	0	0	0.00276486	0	0	0.000912076	0	4.85e-05	0	0.00395539	0	0	0	0.000128891	0.000557828	0	9.87e-05	0.000123335	0	0.003106	0	3.73e-05	0	0	0	4.93e-05	0.000516996	0	0	0	0.000267852	0	0.000180356	0.00417667	0	0	0.00188324	0.00226423	0	0.0007356	0.00456691	0	7.78e-05	0	0.00145683	0.00148894	0.000732109	0.00463798	0
BLAST_UXAC_BACV8 Uronate isomerase OS=Bacteroides vulgatus (strain ATCC 8482 / DSM 1447 / JCM 5826 / NBRC 14291 / NCTC 11154) GN=uxaC PE=3 SV=1_A6L4U4	0.000713199	0.00023015	0	0.00034904	0.00189788	0.000319227	0.00131243	0	0	5.49e-05	0.000118878	4.86e-05	0	0.000386673	0.000371885	0.000273261	0	0.00148002	0.000844024	0.000594766	0.000713746	0.00231188	0.000914181	0.000486322	0.000500713	0.00039473	6.46e-05	0.000152253	0.00278297	0.00189051	0.000107141	0.00011956	0	0.00087014	0.00119813	0.00163287	0	0.000263283	0.000182637	0.00249464	3.07e-05	0.00367981	0.002101	0	0.000392223	0.000770139	0.000915136	0.000412265	0.00101603
BLAST_RL1_CLOTH 50S ribosomal protein L1 OS=Clostridium thermocellum (strain ATCC 27405 / DSM 1237 / NBRC 103400 / NCIMB 10682 / NRRL B-4536 / VPI 7372) GN=rplA PE=3 SV=1_A3DIZ1	0.00185432	0.00195627	0.00056554	0.00139616	0.000231449	0.00223459	0.0015962	0.00174664	0.00164953	0.00142834	0.000594389	0.0020891	0.00046032	0.000837791	0.00111566	0.00122968	0.000493681	0	0.000168805	0	0	0	0.00114273	0	0.00084736	0.00157892	0.000258498	0	0.00121755	0.00156173	0.000160711	0.00023912	0.000721423	0.000974557	0	0	0	0.000105313	0.000791428	0.00207887	0.000490406	0.00110898	0.000194537	0	0.00117667	0.000154028	0.00128119	0.000721464	0.000282231
Metagenome unknown	0	0.00115075	0	0	0	0	0.00102866	0.000582213	0.00122837	0	0	0.00102026	0.0012889	0.000386673	0	0.000409892	9.87e-05	0	0	0.0017843	0	0	0	0	0	0.0022697	0.00187411	0	0	0	0	0.00382592	0	0.00240159	0.00195485	0	0	0	0	0	0	0	0	0	0	0.00266982	0.00439265	0.00216439	0
DPP4_HUMAN Dipeptidyl peptidase 4 OS=Homo sapiens GN=DPP4 PE=1 SV=2	0.000523013	0	0.000188513	0.000814427	0.000833218	0.000638453	0.000461124	0.000824802	0.000175482	0.000604296	0.000594389	0.000485838	0.000828577	0.000966682	0.000743771	0.000136631	0	0.00111002	0.00202566	0.000528681	0.00163742	0.000745768	0.00102845	0.00162107	3.85e-05	0.000542754	0.000452372	0.000951583	0.00143497	8.22e-05	0.000589275	0.00203252	7.21e-05	0	0.000945895	0.000421385	0	0.000315939	0.000487033	0.000607669	0.000337154	0.000655308	0.000933779	0.00286314	0.000224127	0.000770139	0.000427064	0.000979129	0.00107248
LYSC_PANTR Lysozyme C OS=Pan troglodytes GN=LYZ PE=2 SV=1	0.000618106	0.00120828	0.000754053	0.000465387	0.000833218	0.000410434	0.00102866	0.000582213	0.000280771	0.000933912	0.000951022	0.000242919	0.00110477	0.000322227	0.000743771	0	0.000789889	0.00135669	0.00219446	0.00013217	0.00121757	0.000335595	0.00119986	0.000243161	0.000693294	0.000296048	0.000258498	7.61e-05	0.000913163	0	0.00149997	0.0002989	0.00263319	0.000417667	0.00132425	0.000316039	0	0.000368596	0.000243516	0.000159913	0.000122602	0.00131062	0.000739242	0.00114526	0.00117667	0.000667454	0.000488073	0.000412265	0.000338677
BLAST_O16G_BACCO Oligo-1,6-glucosidase OS=Bacillus coagulans GN=malL PE=3 SV=1_Q45101	0	0.00132336	0.00113108	0.000232693	9.26e-05	0.0012313	0	0	0.000701927	0.000109872	0	0.000971676	0.00138096	0.00167558	0	0	0	0	0.00253207	0.00198255	0	0.000410172	0	0	0	0	0.00148636	0	0	0.000328785	0	0	0	0.0043159	0	0	0	0	0	0	0.00278919	0	0.000894872	0	0.00201715	0	0.00115917	0.00113373	0.00129826
BLAST_RS2_DESRM 30S ribosomal protein S2 OS=Desulfotomaculum reducens (strain MI-1) GN=rpsB PE=3 SV=1_A4J5Z3	0.000570559	0.00149597	0.00125676	0.000465387	9.26e-05	0.00132251	0.000496595	0.00150405	0.00119328	0.0021425	0.000832145	0.00126318	0.00193335	0.00109557	0.000557828	0.00122968	0.00157978	0.00098668	0.00270088	0.000198255	0	0.000186442	0.000457091	0.000162107	0.000269614	0.000345389	0.000387747	0.000875457	0.000130452	8.22e-05	0.000482134	0.00041846	0.000288569	0.00135742	0.000126119	0.000210693	0	0.000263283	0.000426154	0.000639652	0.000827561	5.04e-05	0.000272352	0.000190876	0.000952541	0.000359398	0.000915136	0.00108219	0
BLAST_ACDS_CLOAB Acyl-CoA dehydrogenase, short-chain specific OS=Clostridium acetobutylicum (strain ATCC 824 / DSM 792 / JCM 1419 / LMG 5710 / VKM B-1787) GN=bcd PE=1 SV=1_P52042	0.000427919	0.00149597	0.00056554	0.00232693	0.00115725	0.000912076	0.00099319	0.000970356	0.00105289	0.00142834	0.000475511	0.00126318	0.00101271	0.0014178	0.00167348	0.00150294	0.00207346	0.00123335	0.00168805	0.0013217	0	0	0.000857045	0.000162107	0	0.00157892	0.000646245	0	0	0.000246589	0	0.0008967	0.000685352	0.000487279	0.000945895	0	0	0.00015797	0.000608791	6.4e-05	0.000245203	5.04e-05	0	0	0.000392223	0.000770139	0.000732109	0.00082453	0.000338677
BLAST_ETFB_CLOPR Acryloyl-CoA reductase electron transfer subunit gamma OS=Clostridium propionicum GN=acrB PE=1 SV=1_G3KIM7	0	0.000978136	0.00106824	0	0	0.00177855	0.000780363	0.00111591	0.00266732	0.000933912	0	0.000631589	0.00193335	0.000837791	0.000371885	0.000819784	0.00207346	0.00074001	0.00168805	0.000198255	4.2e-05	0.00093221	0.000228545	0.000364742	0.000154065	0.00187497	0.000129249	0	0	4.11e-05	0.000107141	0.00065758	0.000180356	0.00153145	0.000945895	0	0.00121065	0.000631878	0.000974066	0	0.00137927	0.00030245	0.00124504	0	0.000672382	0.000770139	0.000732109	0.00149446	0.000395123
BLAST_PKN1_CALS4 Probable serine/threonine-protein kinase Sps1 OS=Caldanaerobacter subterraneus subsp. tengcongensis (strain DSM 15242 / JCM 11007 / NBRC 100824 / MB4) GN=sps1 PE=3 SV=1_Q8R9T6	0.000190186	5.75e-05	0	0.000232693	0.000185159	4.56e-05	0.000106413	4.85e-05	3.51e-05	0.000109872	0.000237756	0.000194335	0.000276192	0	0.000185943	0	0	0	0	0.00026434	0.00205727	0.000261019	0.00171409	0.00231003	0.00161769	0.000148024	0.00109862	0.00205542	0.00230465	0.00197271	0.000589275	0.00083692	0.000360711	0	6.31e-05	0.000790097	0	0.000526565	0.000487033	0.00188697	0	0.000201633	0.000194537	0	0.000392223	0.000462083	0.000305045	0.000257666	0.000169338
BLAST_ACDS_CLOAB Acyl-CoA dehydrogenase, short-chain specific OS=Clostridium acetobutylicum (strain ATCC 824 / DSM 792 / JCM 1419 / LMG 5710 / VKM B-1787) GN=bcd PE=1 SV=1_P52042	0.00114112	0.00149597	0.000691215	0.000465387	0.00166643	0.00269062	0.00102866	0.00116443	0.00140385	0.00181289	0.000237756	0.00102026	0.00184128	0.00109557	0.000371885	0.00109304	0.00207346	0.000370005	0.00185685	6.61e-05	0	0.000522037	0	0.000243161	0	0.00128287	0	0	0	0	0	0.00197274	0.000108213	0.00087014	0.00182873	0	0	0.000421252	0.0011567	0	0.000980813	0.000100817	0.000505797	0	0.000504286	0.000359398	0.00158624	0.000360732	0.00112892
BLAST_ILV5_YEAST Ketol-acid reductoisomerase, mitochondrial OS=Saccharomyces cerevisiae (strain ATCC 204508 / S288c) GN=ILV5 PE=1 SV=1_P06168	0	0.000172612	0	0	0.000277739	0.00177855	0.00276674	4.85e-05	0	0	0	4.86e-05	0	0.000515564	0	0.000273261	0	0.00197336	0	0.000594766	0	0.00365426	0.000857045	0.00125633	0.000308131	0.000296048	0.000129249	3.81e-05	0	0.000205491	0	0.0011956	7.21e-05	0.00160106	0.00163955	0.000579405	0.00094162	0.000421252	0.00103495	0.000255861	0.00361675	0.00030245	0.00455218	0	5.6e-05	0.00231042	0.000366055	0.000979129	0.000677354
BLAST_G3P_CLOPA Glyceraldehyde-3-phosphate dehydrogenase OS=Clostridium pasteurianum GN=gap PE=1 SV=1_Q59309	0.00137885	0.00109321	0.00113108	0.000581734	0.000925797	0.000729661	0.000709421	0.00087332	0.000912505	0.00126353	0.000951022	0.000825924	0.000552384	0.000966682	0.00223131	0.00204946	0.0010861	0.00148002	0.00219446	0.00118953	0.000545806	0.000372884	0.000514227	0	0.000154065	0.00123353	0.000258498	0.00045676	0	0.000369883	0.000428564	0.0002989	0.000432854	0.000765723	0.000252239	0	0.00107614	0	0.00066967	0.000543704	0.000459756	0.000705716	0.00031126	0	0.000952541	0.000256713	0.000732109	0.000412265	0.000225785
Metagenome unknown	0.00599087	5.75e-05	0	0.00069808	0.00013887	0	0	0.00213478	0.00463272	5.49e-05	0	4.86e-05	0	0.000322227	0.0102268	0.000956415	0	0.000123335	0.0128292	0	0	7.46e-05	0	4.05e-05	0	0	0.000258498	0	0	0	0	0	0.000721423	0	6.31e-05	0	0	0.000263283	0	0	3.07e-05	0	0.000350167	0.000190876	0.000560318	0	0.000793118	0	0
BLAST_SUSC_BACTN TonB-dependent receptor SusC OS=Bacteroides thetaiotaomicron (strain ATCC 29148 / DSM 2079 / NCTC 10582 / E50 / VPI-5482) GN=susC PE=1 SV=1_Q8A1G1	0.00118866	5.75e-05	6.28e-05	0.000465387	0.003194	9.12e-05	0.00237656	0.000194071	7.02e-05	0.000109872	0.000356633	0.00102026	9.21e-05	0.000580009	0.000929714	0.000819784	0.000394945	0.00074001	0.00135044	0.00026434	0.000209925	0.000410172	0.000171409	4.05e-05	0.000616262	0.000592096	0	0.00011419	0.000130452	0.000410981	0.000107141	0	0.000865707	0.000243639	0.000189179	0	0.000134517	0.000105313	0.000121758	0.00131129	0.000245203	0.00272205	0.0020621	0.000763504	0.000168095	0.000513426	0.000366055	5.15e-05	0.00158049
BLAST_TPIS_BACV8 Triosephosphate isomerase OS=Bacteroides vulgatus (strain ATCC 8482 / DSM 1447 / JCM 5826 / NBRC 14291 / NCTC 11154) GN=tpiA PE=3 SV=1_A6KXL2	9.51e-05	0.000345224	0.000879729	0.000116347	0.000277739	0.00200657	0.00127696	0	7.02e-05	0	0	0.000145751	0	0	0.000371885	0	0	0.00394672	0.00033761	0.00026434	8.4e-05	0.00313223	0.000171409	0.00109423	3.85e-05	0.000148024	0.000129249	0.00011419	0.00234813	0.000410981	0	0.00017934	3.61e-05	0.000208834	0.000882835	5.27e-05	0.00618779	5.27e-05	0.00103495	0.000255861	0.00318764	5.04e-05	0.00361839	0	0.000112064	0.00184833	0.000183027	0.000103066	5.64e-05
Metagenome unknown	0.000760746	0.000920598	0	0	0.000694348	0.00246261	0.00230562	0.000679249	0.000140385	0.000329616	0	0.000242919	0.000184128	0	0	0	0	0.00419339	0	0.00013217	8.4e-05	0.00324409	0.000114273	0.000405268	0	0.00039473	0.000129249	0	0.001348	0.000246589	0	0.00071736	0	0.00031325	0.000819776	0	0.00174872	5.27e-05	0.00152198	0.000703617	0.00288114	0.000403266	0.00264571	0	0.000224127	0.00215639	0.000366055	0.000103066	0
Metagenome unknown	0.000427919	0	0	0.000232693	0.00157386	0.0011857	0	0.000242589	0	0	0	0.00335228	0.000368256	0	0	0	0	0.00308337	0.00101283	0.00105736	0	0.00212544	0.000857045	8.11e-05	0	0.00162826	0	0	8.7e-05	0.00308236	0	0	0.000180356	0.000522084	0.000315298	0	0	0	0.000426154	6.4e-05	0	0.00221797	0.00354058	0	0	0.000102685	0.00103716	5.15e-05	0.000677354
Metagenome unknown	0.000618106	0	0.000125676	0.000232693	0.000694348	0.00100328	0.000248297	0.000582213	0	0	0	0.00412962	0.000368256	0	0	0	0	0.00259004	0.00286968	0	0	0.00365426	0.000114273	4.05e-05	0.000192582	0.00231904	0	0	0	0.00275358	0	0	7.21e-05	0.000104417	0.00163955	0	0	0	0	0.000287843	0	0.00156266	0.00552486	0	0.000392223	0.000102685	0.000549082	0	5.64e-05
Metagenome unknown	0.000237733	0.000690449	0.000942566	0.000465387	0.000277739	0.000820868	0.000141884	0.000970356	0.000175482	0.00131846	0.000832145	0.000631589	0	0.000193336	0	0.000273261	0.000296209	0.00209669	0.000168805	0.00198255	0.00033588	0.000186442	0.000285682	0.00133739	0.000154065	0.000148024	0.000193874	0.000266443	0.000260904	0.00102745	0.000267852	0.00017934	0.000252498	0	0.000441418	0.000210693	0.000672585	0.000579222	0.00328747	0.000191896	0.000643658	0.000252042	0.00124504	0.000763504	0.000280159	0.00154028	0.00109816	0.000206132	0.000451569
11S3_HELAN 11S globulin seed storage protein G3 OS=Helianthus annuus GN=HAG3 PE=3 SV=1	0.00109357	0.000920598	0.00270202	0	0	0.00136811	0	0	0	0.00054936	0.00356633	0	0	0	0	0.00163957	0	0.00185002	0.00270088	6.61e-05	0	0.000559326	0	0.00190476	0	0	0	0	0	0	0	0	0.0018757	0.00132261	0.000252239	0	0.00094162	5.27e-05	0	0.000383791	0	0	0.00556377	0	0.000224127	0.00118088	0	0	0.00400768
BLAST_THIL_ALLVD Acetyl-CoA acetyltransferase OS=Allochromatium vinosum (strain ATCC 17899 / DSM 180 / NBRC 103801 / NCIMB 10441 / D) GN=phaA PE=3 SV=2_P45369	0	0.000920598	0.00131959	0.000232693	0.000601768	0.00209778	0.00180902	0.00232885	0.0019303	0.00131846	0	0.000777341	0.00138096	0.000966682	0.000557828	0.00163957	0.00138231	0.00123335	0.00033761	0.00026434	0	0.00100679	0	0.000932118	0	0.000789461	6.46e-05	0	0	0	0	0.00131516	7.21e-05	0.000765723	0.000882835	0	0	5.27e-05	0.0011567	0	0.00134862	0.000201633	0.00132285	0	0.000112064	0.000564769	0.00152523	0.00066993	0.0007338
OVAL_CHICK Ovalbumin OS=Gallus gallus GN=SERPINB14 PE=1 SV=2	0	0.000632911	0.00358175	0	0	0.000182415	0	0	0	0	0	0	0	0	0	0	0	0	0	0.000726936	0	0.000633903	0	0.00109423	0.00231098	0.000296048	0	0.000152253	0	0.000123294	0.000428564	0	0	0.000243639	6.31e-05	0.00179089	0.00349744	0.0032647	0	0	0.00478146	0	0	0.000190876	0	0	0	0.00108219	0.000338677
BLAST_SCPA_ECOLI Methylmalonyl-CoA mutase OS=Escherichia coli (strain K12) GN=scpA PE=1 SV=2_P27253	9.51e-05	0.000575374	0.00113108	0	0.00698977	0.000273623	0.00202185	0	7.02e-05	0	0.000237756	0.000291503	0	0.000193336	0	0	0	0.00518007	0.00101283	0.000528681	0	0.00145425	0.000285682	0.000405268	0	0.000592096	0	3.81e-05	0	0.0022193	0	0	0.00133463	0.000417667	0.000126119	0.000105346	0.000269034	0	0.0014611	0.000447756	0.000613008	0.00115939	0.00101159	0	0.000224127	0.00138625	0.0006711	0.000412265	0
IAA1_WHEAT Alpha-amylase inhibitor 0.19 OS=Triticum aestivum PE=1 SV=1	9.51e-05	0.00126582	0.000125676	0.00151251	0.000833218	0.00159613	0.000851305	4.85e-05	7.02e-05	0.00340603	0.00261531	0	0	0	0.000185943	0	0	0.00209669	0.00118163	0.000198255	0	0	0	0.000283688	0.000308131	0	0.000129249	0.00022838	0	0	0.00139283	0.00161406	0.000865707	0.000348056	0	0.000684751	0.00147969	0	0	0.000415774	6.13e-05	0	0.00031126	0.00305402	0.000112064	0	0	0.000103066	0.00129826
ENO_BIFLS Enolase OS=Bifidobacterium longum subsp. infantis (strain ATCC 15697 / DSM 20088 / JCM 1222 / NCTC 11817 / S12) GN=eno PE=3 SV=1	0	0.00299195	0.000879729	0.00104712	0.00120354	0.00100328	0.00365352	0.000776285	0.0019303	0.000604296	0	0	0.00322224	0.00309338	0	0.000546523	0.000493681	0.00024667	0.00033761	0.000726936	0	0	0.00239973	0	0.000385164	0.00103617	0.00122787	0.000266443	0	0	0.000107141	0.00227164	0.00122642	0.000104417	0.00195485	0	0	0.00110579	0.000487033	0	0	0.000100817	0	0	0	0	0.000488073	0	0
Metagenome unknown	0.00014264	0.000517837	0.000251351	0.00139616	0.000416609	0.000501642	0.00031924	0.000291107	0.000140385	0.000164808	0.000118878	0.000194335	0.000644449	0.000322227	0.000743771	0.000546523	0.000592417	0.000370005	0.000844024	0.000726936	0.000545806	0.000298307	0.0006285	0.00064843	0.000385164	0.000690778	0.00071087	0.000380633	0.00021742	0.000205491	0.000642846	0.00053802	0.000468925	0.000278445	0.000567537	0.000737424	0	0.000473909	0.000365275	0.000223878	0.000183902	0.000756125	0.00046689	0.00133613	0.0010646	0.000718797	0.000793118	5.15e-05	0.00107248
BLAST_NIFJ_ENTAG Pyruvate-flavodoxin oxidoreductase OS=Enterobacter agglomerans GN=nifJ PE=3 SV=3_P19543	0.00014264	0.000517837	0.000125676	0	0.000462899	0.00150493	0.00141884	0.000533696	0.000210578	0.000164808	0	0.00038867	0.000184128	0.000451118	0.000185943	0.000273261	0.000493681	0.00320671	0.00033761	0.000330426	0	0.00589156	0.000514227	0	0	9.87e-05	0.000387747	0	0.000304388	0	5.36e-05	0	0.000144285	0.000730918	6.31e-05	0	0.000134517	0.000526565	0.000243516	0.000255861	0.00456691	0.000403266	0.00540814	0	0.000112064	0.00272116	0.000244036	0.000876063	0.000508015
BLAST_IUTA_KLEPN Ferric aerobactin receptor OS=Klebsiella pneumoniae GN=iutA PE=1 SV=1_Q6U607	0.00128376	0.000172612	6.28e-05	0.000581734	4.63e-05	0	0	4.85e-05	0	0	0.000475511	0.00038867	0	0.000644454	0.00167348	0.00628501	0.000394945	0	0.00135044	0	0	0	0.000457091	0	0.00184878	0	0.000323123	7.61e-05	0.001348	0.000534276	0	0.00077714	0.00119035	0.00104417	0.000819776	0.00126416	0	0	0.000243516	0.00281447	0	0.0012098	0	0.000190876	0	0	0	0	0.000169338
CASB_SHEEP Beta-casein OS=Ovis aries GN=CSN2 PE=1 SV=3	0	5.75e-05	0	0	0	0	0	0	0	0.00054936	0.00118878	0	0	0	0	0	0	0	0	0	0.00331682	0.00100679	0	0	0.000962909	0	0.00071087	0	0	0.000698668	0.00166069	0	0.000288569	0	0	0	0.000672585	0.00426518	0	3.2e-05	0	0	0	0	0	0.000718797	6.1e-05	0	0.000903138
BLAST_DPS_SHISS DNA protection during starvation protein OS=Shigella sonnei (strain Ss046) GN=dps PE=3 SV=3_Q3Z3X3	0	0	0	0	0	4.56e-05	0	0	0	0	0	0	0	0	0	0	0	0	0	0	0.000755731	0.00395257	0.000228545	0	0.000115549	0	0	0	0.000478323	0.00147953	0	0	7.21e-05	0	0	0.00758494	0.00390099	0.000737191	0	0	0	0.00191552	0	0	0.00179302	0	0	0.000103066	0
BLAST_EXBB_HAEIN Biopolymer transport protein ExbB OS=Haemophilus influenzae (strain ATCC 51907 / DSM 11121 / KW20 / Rd) GN=exbB PE=3 SV=1_P43008	0.000523013	0.000805524	0.00056554	0.000814427	0.000601768	9.12e-05	0.000283768	0.000339624	0	0	0.000237756	0.000825924	0	0.000322227	0.00167348	0.00273261	0.00177725	0	0.0035449	0.000462596	0	0	0.000971318	0.000324215	0.00184878	9.87e-05	0.000516996	0	0.000478323	0.000369883	0	0.00065758	0.000757494	0.00132261	0.000252239	0.000526732	0	0.000263283	0	0.000159913	0	0.000504083	3.89e-05	0	0.000224127	0.000256713	0.000854127	0.000618397	0.000677354
BLAST_MALX_STRR6 Maltose/maltodextrin-binding protein OS=Streptococcus pneumoniae (strain ATCC BAA-255 / R6) GN=malX PE=2 SV=1_P59214	0	0.000690449	0.000691215	0.000814427	0	0.000638453	0	0	0.00315867	0.00252706	0.000118878	0.00267211	0.00165715	0.00232004	0	0.000956415	0.00187599	0.00111002	0.000168805	0.000594766	0	3.73e-05	0	0	0	0.000888143	0.00206799	0	0	0	0	0	0	0	0	0	0.000269034	0.000105313	0.00066967	0	0	0	0.000350167	0	0.00324985	0.000359398	0.00390458	0.00128833	0
BLAST_RL11_LACP7 50S ribosomal protein L11 OS=Lachnoclostridium phytofermentans (strain ATCC 700394 / DSM 18823 / ISDg) GN=rplK PE=3 SV=1_A9KJM0	0.000950932	0.000690449	0	0.000581734	0.000185159	0.000592849	0.000496595	0.00203775	0.000947601	0.00115366	0.000356633	0.00155468	0.000828577	0.000193336	0.000557828	0.000136631	0	0	0	0.000198255	0.00033588	3.73e-05	0.000457091	0	0.000693294	0.00192431	0.000258498	0.000190317	0	0.000369883	0.000535705	0.00011956	0.000252498	0.000104417	0.000693656	0	0.000134517	0.000895161	0	0.000511722	0.000521057	0.0006049	0.00031126	0	0.00257746	0.0010782	0.0013422	0.000515331	0
BLAST_PFLB_ECOLI Formate acetyltransferase 1 OS=Escherichia coli (strain K12) GN=pflB PE=1 SV=2_P09373	0	0	0	0.000232693	0	0	0	0	3.51e-05	0	0	0	0	0	0	0	0	0	0	0	0.00016794	0.00678649	0	0	3.85e-05	0	6.46e-05	0	4.35e-05	0	0	0	0	0	0	0.00916513	0.00376648	0.00173766	0	0	0	0.00660349	0	0	0.00437048	0.000102685	0	0.000360732	0
BLAST_FTN_BACF6 Bacterial non-heme ferritin OS=Bacteroides fragilis (strain 638R) GN=ftnA PE=2 SV=1_E1WS50	0.000998479	0	6.28e-05	0.00034904	0.000879507	0	0.000212826	0.000194071	0.000140385	0	0.000237756	0.00228344	0.000644449	0	0	0.000956415	0.000197472	0	0.00320729	0.000859107	0	0	0.00137127	0.000162107	0.000924392	0.000986826	0.000193874	0.000266443	0.000434839	0.00168502	0	0.00047824	0.000973921	0.00031325	0.000504477	0	0	0	0.000365275	0.000799565	0	0.000252042	0	0	0.000392223	0.00020537	0.00140321	0.000103066	0.00135471
BLAST_G6PI_TREDE Glucose-6-phosphate isomerase OS=Treponema denticola (strain ATCC 35405 / CIP 103919 / DSM 14222) GN=pgi PE=3 SV=1_Q73K18	0.000523013	0.000460299	0.000879729	0.00069808	9.26e-05	0.000684057	0.000957719	0.00121294	0.00164953	0.00104378	0	0.00126318	0.000644449	0.00109557	0.000371885	0.000956415	0.000493681	0.000123335	0	0.000396511	0	0	5.71e-05	0	0	0.00192431	0.000258498	3.81e-05	0	0.00143844	0	0.00077714	0.000468925	0.00104417	0.000630597	0	0	0.000368596	0.00158286	0.000159913	0.000674309	0.000252042	0.00015563	0	0.000224127	0.000102685	0.00122018	0.000772997	0.000112892
BLAST_MOP_DESGI Aldehyde oxidoreductase OS=Desulfovibrio gigas GN=mop PE=1 SV=1_Q46509	0.00180677	0.00126582	0.000125676	0.000581734	0.0013887	0.000547246	0.000922247	0.000485178	0.000315867	0.000219744	0.000118878	0.000777341	0.000736513	0.00103113	0.000557828	0.000819784	0.000987362	0.00135669	0.00118163	0.000396511	0	0	0.001257	0	0.000577745	0.00138156	0	0	0	0.000616472	0	0.00125538	0.000144285	0.00135742	0.000441418	0	0	0	0.00103495	0.000351809	0.000459756	0.00156266	0.000116722	0	0.000392223	0.000462083	0.00146422	0	0
BLAST_GATM_XENLA Glycine amidinotransferase, mitochondrial OS=Xenopus laevis GN=gatm PE=2 SV=2_Q9IAJ6	0.00104602	0.000460299	0	0.000116347	0.000509189	0.00127691	0.000851305	0.000921838	0.000210578	0.000384552	0	0.00111743	0	0	0	0.000546523	0.000691153	0	0.00033761	6.61e-05	0	0.000484749	0.000171409	0.000567376	0.000924392	0.00152958	0.000258498	0.000418697	0	0.000739767	0	0.00077714	0.000144285	0.000522084	0.000441418	0	0	0.000684535	0.000730549	0	0.00278919	0	0.000272352	0	0.00112064	0.00154028	0.0013422	0.000309199	0.000508015
PGK_ECO57 Phosphoglycerate kinase OS=Escherichia coli O157:H7 GN=pgk PE=3 SV=3	0	0	0	0	0	0	0	0	0	0	0	0	0	6.44e-05	0	0	0	0	0	0	4.2e-05	0.00503393	0	0	3.85e-05	0	0	0	4.35e-05	0	5.36e-05	0	0	0	0	0.0035291	0.00686037	0.000473909	0	0	0	0.00428471	0	0	0.00319381	0	0	0.000309199	0
ACDS_MEGEL Acyl-CoA dehydrogenase, short-chain specific OS=Megasphaera elsdenii PE=1 SV=1	0	0	0	0	0.00212933	0	0	0	0	0	0	0	0	0.000128891	0	0	0	0	0	0.00145387	0	0	0.00268541	0	0	0	0.00148636	0	0	0	0	0.00047824	0	0	0	0	0	0	0.00127846	0	0	0	0	0	0	0	0	0	0
BLAST_OMP40_PORGI Outer membrane protein 40 OS=Porphyromonas gingivalis (strain ATCC BAA-308 / W83) GN=PG_0694 PE=1 SV=1_Q9S3R8	0	0	0	0	0.00124983	0.00533564	0.00223468	0	0	0	0	0	0	0	0	0	0	0.00801677	0	0	0	0.00313223	0	0.0021074	0	0	0	0	0.00126103	0.00119185	0	0.00107604	0	0	0	0	0.00363196	0	0.000608791	0	0.000337154	0	0.00202319	0	0	0	0	0	0
BLAST_SERC_BACV8 Phosphoserine aminotransferase OS=Bacteroides vulgatus (strain ATCC 8482 / DSM 1447 / JCM 5826 / NBRC 14291 / NCTC 11154) GN=serC PE=3 SV=1_A6L5A6	0.000618106	0.000115075	0.000125676	0	0.000972087	0.000684057	0.00205732	0.000291107	0.000140385	0.000164808	0	0.000680173	0	0.000580009	0.000185943	0.000409892	0	0.00222003	0	0	0	0.00175255	0.000457091	0.000567376	0.00138659	0.000493413	6.46e-05	7.61e-05	0.000478323	0.000986355	0	0.00083692	0.000757494	0.00114858	0.000819776	0	0.000807103	0.000105313	0.000426154	0.000383791	0.00162447	0.00201633	0.00120613	0	0.000392223	0.000718797	0.000427064	0.000412265	0.000112892
BLAST_SLPA_DEIRA S-layer protein SlpA OS=Deinococcus radiodurans (strain ATCC 13939 / DSM 20539 / JCM 16871 / LMG 4051 / NBRC 15346 / NCIMB 9279 / R1 / VKM B-1422) GN=slpA PE=1 SV=1_Q9RRB6	0	0	0	0.000232693	0.00106467	0.00155053	0	0.000194071	0	0	0.00130766	0	0.000368256	0.000257782	0	0.00122968	0	0.00049334	0.00033761	0.000859107	0	0.000484749	0.0006285	0.00202634	0.000269614	0	0	0	0	0	0	0.00173362	0.00227248	0	0.000756716	0	0	0	0.00231341	0	0	0.00352858	0.00015563	0	0.000728414	0.00020537	0	0	0
HBB_CALGO Hemoglobin subunit beta OS=Callimico goeldii GN=HBB PE=2 SV=3	0	0	6.28e-05	0	0	0	0	0	0	0	0	0	0	0	0	0	9.87e-05	0	0	0	0	0	0.000114273	0.00324215	0	4.93e-05	0	0	0	0	0.000107141	0	7.21e-05	0	0	0	0	0	0	0	6.13e-05	5.04e-05	0.00015563	0	0.000336191	0.000102685	0.000122018	0.000309199	0.00135471
Metagenome unknown	0.00156904	0.000115075	0	0.00104712	0	0	0	0	0	0	0	0.00038867	0	0	0.00204537	0.00232272	0	0	0.00151924	0	0	0	0.00182836	0	0.00335092	0	0.000129249	0.000380633	0.00221768	0.00065757	0	0.0002989	0.000793565	0.000243639	0	0.00158019	0.000134517	0	0	0.000959478	3.07e-05	0.000453675	0	0	0.000504286	0	0.00128119	0.000103066	0.000112892
BLAST_PDUB_SALTY Propanediol utilization protein PduB OS=Salmonella typhimurium (strain LT2 / SGSC1412 / ATCC 700720) GN=pduB PE=2 SV=2_P37449	0.000950932	0.00178366	0.00144527	0.000465387	0.00166643	0.000592849	0.000851305	0.00106739	0.000491349	0.000769104	0.000475511	0.000923092	9.21e-05	0.000902236	0.000185943	0.000683153	0.000493681	0.00024667	0.00033761	6.61e-05	0	0.000149154	0	0	0	0.000986826	0	0	0	0	0	0.00023912	0.000721423	0.000591695	0.000189179	0	0	0.00015797	0.00140022	0	0.000337154	0.000352858	0.000427982	0	0.000504286	0.000564769	0.0006711	0	0.000677354
BLAST_FRCB_RHIML Fructose import binding protein FrcB OS=Rhizobium meliloti GN=frcB PE=1 SV=1_Q9F9B2	0.000190186	0.0013809	0.000502702	0.00034904	9.26e-05	0.000456038	0.000212826	0.000291107	0.000596638	0.000988848	0.000713267	0.000680173	0.000644449	0.000902236	0.000743771	0.00232272	0.000394945	0.00049334	0.000675219	0.000594766	0	7.46e-05	0.000742772	0	0.000385164	0.00128287	0.000129249	7.61e-05	4.35e-05	0.000493178	0	0.00017934	7.21e-05	0.00087014	0.000126119	0	0.000672585	0.000210626	0.00164374	0.000639652	0.000551707	0.0006049	7.78e-05	0.000190876	0.000504286	0.000410741	0.00146422	0.000103066	0.000225785
CEL_HUMAN Bile salt-activated lipase OS=Homo sapiens GN=CEL PE=1 SV=3	0.000332826	0.00023015	0	0.000232693	0.000462899	0.00036483	0.000603008	0.00126146	0	0.000109872	0	0	9.21e-05	0	0.000371885	0	0	0.000370005	0.00033761	0	0.00285498	0.00100679	0	0	0.000346647	0.000444072	0	0	0	0.000246589	0.00637489	0.0014945	0	0	0.000252239	5.27e-05	0.000134517	0.000421252	0	0.00159913	0.000214553	0.00030245	0.000233445	0	0.000112064	0.00195102	0.000183027	0.00180366	0
NEP_RAT Neprilysin OS=Rattus norvegicus GN=Mme PE=1 SV=2	0.00190186	0	0	0.000232693	0.000277739	0.000775265	0.000425653	0.000145553	0.000140385	0.000769104	0	0.00038867	0.000552384	0	0	0	0.000789889	0.000123335	0.000675219	0	0.000419851	0.000186442	0.00142841	0.000567376	0	0	0.00135712	0.00045676	0	0	0.000374993	0.00161406	0	0	0.000567537	0	0	0.00105313	6.09e-05	0	0.000306504	0	0.00175084	0.000572628	0	0.000667454	0	0.000412265	0
IGG1_HUMAN Immunoglobulin gamma-1 heavy chain OS=Homo sapiens PE=1 SV=1	0.000618106	0.000115075	0	0.000232693	0	0	0.000141884	9.7e-05	0.000105289	0	0	9.72e-05	0	6.44e-05	0.0013016	0.000273261	0	0	0.000168805	0.000462596	0.00277101	0	0.000457091	0.00360689	0.000731811	0	0.000387747	0.000494823	0.000130452	0.000205491	0.00701773	0.0002989	0.00104606	0	0.000252239	0.000895444	0.000403551	0.00015797	0	0.000351809	0	0.000100817	3.89e-05	0.000190876	0	0	6.1e-05	0.000463798	0.00107248
BLAST_TAL_MYCS2 Transaldolase OS=Mycobacterium smegmatis (strain ATCC 700084 / mc(2)155) GN=tal PE=1 SV=1_A0QWX9	0	0.00201381	0.000942566	0.000465387	0.00217562	0.000456038	0.00358258	0.000291107	0.00150914	0.000109872	0	0	0.00174922	0.00264226	0	0.000136631	0.000197472	0.00074001	0.000506415	0.00013217	0	0.000111865	0.00222832	0	0.000770327	0.00039473	0.000840119	0.000152253	0	0	0	0.00101626	0.00173141	3.48e-05	0.00145037	0	0	0.00100047	0.000304395	0	0	0	0	0	0	0	0.000305045	0	0
BLAST_TNAA_CALS4 Tryptophanase OS=Caldanaerobacter subterraneus subsp. tengcongensis (strain DSM 15242 / JCM 11007 / NBRC 100824 / MB4) GN=tnaA PE=3 SV=1_Q8R9K5	0	0.000805524	6.28e-05	0.000116347	0	0.000684057	0.000922247	0.000291107	0.00038606	0.000769104	0	0.000291503	0.000644449	0.00103113	0	0.00218609	0.000493681	0.000863345	0.000168805	0.000528681	0	0.000522037	0.000857045	8.11e-05	0.000154065	0.00157892	0.000581621	0	0	4.11e-05	0	0.0008967	0.000144285	0	0.000189179	0	0	0.000526565	0.00127846	0	0.000337154	0.00030245	7.78e-05	0.000381752	0.000448255	0.00164296	0.00103716	0.00118526	0.000508015
BLAST_ACKA_AGARV Acetate kinase OS=Agathobacter rectalis (strain ATCC 33656 / DSM 3377 / JCM 17463 / KCTC 5835 / VPI 0990) GN=ackA PE=3 SV=1_C4Z917	0.00180677	0.000575374	0.000125676	0.000814427	0.000879507	0.000684057	0.00102866	0.00043666	0.000877408	0.000714168	0.000237756	0.000874508	0.000552384	0.000966682	0.00148754	0.000956415	0.0010861	0.000123335	0	0.00026434	0	0.00100679	0.000799909	0	0.000500713	0.000789461	0.000129249	0	0.000173936	0.000698668	5.36e-05	0.00047824	0.000252498	0.000696112	0.000252239	0.00110614	0.000269034	0.000210626	0.000608791	0.000287843	0.000245203	0.0012098	0	0	0.000560318	0.000102685	0.0006711	0	5.64e-05
Metagenome unknown	0	0	0	0	0	0	0	0	0	0	0	0	0	0	0	0	0	0	0	0.000528681	0.00109161	0.000298307	0.00199977	0.00186423	0.000654778	0.000148024	0.00129249	0.00106577	0.0010871	0.000698668	0	0.00017934	0.000432854	0	0.000504477	0.000684751	0	0.00226423	0	0.000575687	0	0.000151225	7.78e-05	0	0	0.000616111	0	0.000103066	5.64e-05
Metagenome unknown	0	5.75e-05	0	0.000465387	9.26e-05	0	0	0.00043666	7.02e-05	0	0	0.00174902	0	0	0.00111566	0.0017762	0.000394945	0.000123335	0.00033761	6.61e-05	0	0	0.00217118	0	0.000770327	0.00138156	0.000387747	0.00034257	0.00156542	0.000534276	5.36e-05	0.00047824	0.00108213	0.00107897	0.000630597	0.000263366	0	5.27e-05	0.000182637	0.000959478	3.07e-05	0.00100817	0	0	0.000952541	0.000410741	0.000244036	5.15e-05	0.000112892
BLAST_RRBR1_CLOAB Reverse rubrerythrin-1 OS=Clostridium acetobutylicum (strain ATCC 824 / DSM 792 / JCM 1419 / LMG 5710 / VKM B-1787) GN=rbr3A PE=1 SV=1_Q97D82	0.000332826	0.000632911	0.00106824	0.000814427	0.000786928	0.000684057	0.000567537	0.000533696	0.00133366	0.000714168	0.00118878	0.00155468	0.000920641	0.000644454	0.000185943	0.000683153	0.000888626	0.00074001	0.000675219	0.000859107	0	7.46e-05	0.000171409	8.11e-05	7.7e-05	0.000592096	0.000452372	0	0	0.000246589	0	0.00035868	0.000216427	0.000522084	0.000630597	0.000263366	0.000538068	0.000105313	0.000365275	0	0.000521057	0.000403266	0	0.000572628	0.000112064	0	0.000305045	0.00066993	0.000564462
BLAST_GAHP2_LACP7 1,3-beta-galactosyl-N-acetylhexosamine phosphorylase Cphy0577 OS=Lachnoclostridium phytofermentans (strain ATCC 700394 / DSM 18823 / ISDg) GN=Cphy_0577 PE=1 SV=1_A9KIW5	0.000523013	0.000287687	0.000314189	0.00430483	0.000509189	0.000319227	0.000390182	0.000145553	3.51e-05	0.00027468	0.000118878	0.000631589	0.00239367	0.000644454	0.000371885	0.000136631	0.00148104	0.00024667	0	0.00013217	0	0.000111865	0.000114273	0.000202634	0.000192582	4.93e-05	0.00142174	0.000380633	0.000304388	0.000123294	0.000214282	0.00095648	7.21e-05	0.000139222	0.00107201	0.000632078	0	0.000631878	0.000304395	3.2e-05	3.07e-05	0.000252042	0.00015563	0.000954381	0	0.000102685	0.000549082	0.000206132	0.000282231
BLAST_MSME_BACSU Putative binding protein MsmE OS=Bacillus subtilis (strain 168) GN=msmE PE=1 SV=1_O34335	0.000427919	0.000402762	0	0.0017452	0.000972087	0.000228019	0.000141884	0	0.000526445	0	0	0.000728757	0	0	0	0.000136631	0	0	0	0	0	7.46e-05	5.71e-05	0	0.000231098	0.00231904	0	7.61e-05	0	0.00328785	0	0.00011956	7.21e-05	0.00135742	0.00176567	0	0.000134517	0.00015797	0.0026178	0.00191896	0.000275854	0.00115939	0.000194537	0	0.00061635	0.000102685	0.00183027	0	0
BLAST_MGLB_TREPA Glucose/galactose-binding lipoprotein OS=Treponema pallidum (strain Nichols) GN=mglB PE=1 SV=1_Q08255	0.000855839	0.00172612	0.000314189	0.00209424	0.000601768	0.000547246	0.000532066	0.000388142	0.00038606	0.000933912	0.000356633	0.000631589	0.000644449	0.000257782	0.000185943	0.000683153	0	0.000123335	0.000168805	0.000198255	0.000839701	0.000149154	0.000114273	0.000283688	0.000693294	0.000444072	0.000129249	3.81e-05	8.7e-05	0.000287687	0	0.0005978	0.000288569	0.000139222	0.000378358	5.27e-05	0.000134517	0.000105313	0.00127846	0.000255861	0.000582358	0.000504083	0.000194537	0.000381752	0.000224127	0.000308056	0.00128119	0.000515331	0
ACY1A_RAT Aminoacylase-1A OS=Rattus norvegicus GN=Acy1a PE=1 SV=1	0	0	0.000125676	0	0	0.00036483	0.000141884	0	0	5.49e-05	0	0.000145751	0	0	0	0	0	0.00024667	0.000168805	0.000925192	8.4e-05	0.000969498	0	0.000121581	0.000231098	0	6.46e-05	0	0.00165239	0.00209601	0.000749987	0.00017934	0	0	0	0	0.000269034	0.000631878	0	0.00118336	0.000521057	0.00272205	0.00143958	0	5.6e-05	0.00112954	0	0.00185519	0.00124182
TITIN_HUMAN Titin OS=Homo sapiens GN=TTN PE=1 SV=4	9.51e-05	0	0	0.000465387	4.63e-05	0	0.000212826	4.85e-05	0.00498368	5.49e-05	0.000118878	0	0	0.000128891	0	0.00204946	0.000394945	0	0	6.61e-05	8.4e-05	3.73e-05	0	8.11e-05	0	0	0.00575158	0.00079933	0	0.000945257	0.000214282	0.00011956	0	0	0.000189179	0	0.00174872	0.00015797	0.000365275	0.0014712	9.2e-05	0.000453675	7.78e-05	0.000190876	0	0	6.1e-05	0.000412265	0.000338677
BLAST_RUBY_PORGI Rubrerythrin OS=Porphyromonas gingivalis (strain ATCC BAA-308 / W83) GN=rbr PE=2 SV=1_Q9AGG3	0.000570559	0.00023015	0.000628378	0.000581734	0	0	0	0	0.000210578	0	0	0.000777341	0.000276192	0.000322227	0	0.000273261	0	0	0.000506415	0.000330426	0	0	0.000742772	0	0	0.00039473	6.46e-05	0.000418697	0.000130452	0.000698668	0	0.00047824	0.00183963	0.00031325	6.31e-05	0.000474058	0	0	0.000365275	0.000991461	9.2e-05	0.00166347	0	0	0.000728414	0.000308056	0.000732109	0.000309199	0.00101603
Metagenome unknown	0	0	0	0.00116347	9.26e-05	0	0.00198638	0.00402698	0	0	0	4.86e-05	0	0	0	0	0	0	0	0	0	0	0	0	0	0	0	0	0	0	0	0.00017934	0	0.00257561	0	0	0	0	0	0.00342214	0	0.0036294	0	0	0.00100857	0	0.00408761	0	0
BLAST_CYCB_BACSU Cyclodextrin-binding protein OS=Bacillus subtilis (strain 168) GN=cycB PE=1 SV=1_O07009	0	0.00316456	0	0.00034904	0.000185159	0.00100328	0.00258939	0.00087332	7.02e-05	0.000494424	0	0	0.00220954	0.00128891	0.000185943	0.000819784	0	0	0	0	0	0.000820345	0.00331391	0	0.00238801	0	0	0.00022838	0	0	0	0.0026901	0.000252498	0	0	0	0	0.00163235	0.000791428	0	0	0	0	0	0	0	0	0	0
BLAST_PORF_PSESY Outer membrane porin F OS=Pseudomonas syringae pv. syringae GN=oprF PE=3 SV=1_P22263	0	5.75e-05	0.000251351	0	0.000231449	0.00264502	0.00255392	0	0	5.49e-05	0	0	0	0	0	0	0	0.00641342	0	6.61e-05	0	0.00309494	0	0.00101317	0	0	0	0	0.000347871	0	0	0.00071736	0	0	0.000945895	0	0.00201776	0	0.00164374	0	0.00113407	0	0.00198428	0.000190876	0	0.00097551	0	0.000206132	0
BLAST_ACSC_MOOTH Corrinoid/iron-sulfur protein large subunit OS=Moorella thermoacetica GN=acsC PE=1 SV=2_Q07340	0.00290034	0.000863061	0.000377027	0.000814427	0.000925797	0.000456038	0.000425653	0.000242589	0.000105289	0.000494424	0.000356633	0.00111743	0.000552384	0.000257782	0.00223131	0.00150294	0.000493681	0.00049334	0.00101283	0.000330426	0	0	0.00102845	0	0.000154065	0.000345389	0.000129249	0	0	0.000164393	0	0.00011956	0.000901778	0.00107897	0.000441418	0	0	0.000842504	0.00158286	0.000351809	0.000122602	0.000705716	7.78e-05	0.000190876	0.000728414	0.000308056	0.000488073	0	0
BLAST_ATPA_PANTR ATP synthase subunit alpha, mitochondrial OS=Pan troglodytes GN=ATP5A1 PE=2 SV=1_A5A6H5	4.75e-05	0.000115075	0.000502702	0.000116347	0.00013887	0.000638453	0.000780363	9.7e-05	0.000210578	0.000329616	0.000832145	9.72e-05	0.000276192	0.00109557	0.000371885	0.000273261	0.000394945	0.00074001	0.000675219	0.000660851	0.00025191	0.000783056	0.000457091	0.00077001	0.000385164	0.000296048	0.000129249	0.00110384	0.000130452	0.000164393	0.000749987	0.00023912	3.61e-05	0.000174028	0.000315298	0.000895444	0.000403551	0.000473909	0.000426154	0.000287843	0.000429106	0.000856941	0.00046689	0.000381752	0.000280159	0.000308056	0.000183027	0.00139139	0.000112892
Metagenome unknown	0	0	0	0	0	0.000638453	0.00067395	0	0	0	0	0	0	0	0	0	0	0.00172669	0	0	0	0.00678649	0	0	0	0	0	0	0.00421794	0.0148364	0	0.00047824	0	0	0	0	0.00107614	0	0	0	0.000367805	0	0.00136176	0	0	0.000718797	0	0	0
BLAST_TYPH_LACRH Thymidine phosphorylase (Fragment) OS=Lactobacillus rhamnosus GN=deoA PE=1 SV=1_P19663	0.000380373	0.00178366	0.000251351	0.00069808	0.00203675	0.0012313	0.00283768	0.000679249	0.000737023	0.000769104	0	0	0.00276192	0.00186892	0	0	0	0.00074001	0	0.000660851	0	0.000111865	0.00171409	0	0.000500713	9.87e-05	0.00122787	0.000266443	8.7e-05	0	0	0.00041846	0.00169534	0	0.000945895	0	0	0.000842504	0.000121758	0	0	0	0	0	0	0	0.000122018	0	0.000225785
BLAST_ARAA_BACV8 L-arabinose isomerase OS=Bacteroides vulgatus (strain ATCC 8482 / DSM 1447 / JCM 5826 / NBRC 14291 / NCTC 11154) GN=araA PE=3 SV=1_A6L2R5	9.51e-05	0.000115075	0.000314189	0	0.000555478	0.000866472	0.00156073	9.7e-05	0	0	0	0.000291503	0	0.000515564	0.0013016	0	0	0.00407005	0.00185685	0	0	0.0016034	0.000685636	0.000729483	0.00042368	0	0	0	0.000347871	0	0	0.00017934	7.21e-05	0.000974557	0	0	0	0	0.000121758	0.00012793	0.00101146	0.00176429	0.00132285	0	0	0.00112954	0.000488073	0.00108219	0
Metagenome unknown	0.00137885	0.00563867	0	0	0	0	0	0	0.00150914	0	0	0	0	0	0	0	0.000789889	0	0	0	0	0	0	0	0	0.000493413	0	0	0	0.0112198	0	0	0	0	0	0	0	0	0	0	0	0	0	0	0	0	0	0	0
BLAST_ACDS_MEGEL Acyl-CoA dehydrogenase, short-chain specific OS=Megasphaera elsdenii PE=1 SV=1_Q06319	0.00156904	0.000575374	0	0	0.00106467	0.000820868	0.000709421	0.00043666	0.000491349	0	0	0.000291503	0.000184128	0.000515564	0	0	0.000197472	0	0	0.000330426	0	0	0.000457091	0.000364742	0.000500713	0.000740119	0	0	0	0.00106855	0	0.00053802	0	0	0	0	0	0	0.00213077	0	0.000827561	0.00100817	0	0	0.000672382	0.00102685	0.000427064	0	0.000508015
BLAST_RL4_AGARV 50S ribosomal protein L4 OS=Agathobacter rectalis (strain ATCC 33656 / DSM 3377 / JCM 17463 / KCTC 5835 / VPI 0990) GN=rplD PE=3 SV=1_C4ZBD5	0.00114112	0.000632911	0	0.00162885	0.000185159	0.000456038	0.000461124	0.000339624	0.000456252	0.000329616	0.000713267	0.000631589	0.000828577	0.000644454	0.00185943	0.00163957	0.000197472	0.000370005	0.00135044	0	0	0	0.000571363	8.11e-05	0.000616262	0.000197365	0	0.00022838	8.7e-05	0.000698668	5.36e-05	0.00071736	0.000216427	0.000174028	0.000441418	0	0.000134517	0.000368596	0.000487033	0.000703617	0.000153252	0.000352858	7.78e-05	0.000572628	0.000448255	0.000410741	0.000488073	0.000103066	0.000112892
Metagenome unknown	0	0	0	0	0	0	0	0	0	0	0	0	0	0	0	0	0	0	0	0	0.00016794	0.00742039	0	0	0.000731811	0	0	0	0.000434839	8.22e-05	0	0	0	0	0	0.00990256	0.00457358	0	0	0	0	0.0012098	0	0.000190876	0	0	0	0	0
BLAST_CYCB_BACSU Cyclodextrin-binding protein OS=Bacillus subtilis (strain 168) GN=cycB PE=1 SV=1_O07009	0	0.000172612	0	0.00127981	0.0013887	0.000775265	0	0	0.000596638	0.000164808	0	0	0.00202541	0.000773345	0	0	0	0	0.00185685	0	0	0.00104407	0	0	0	0	0.000516996	0	0	0.000246589	5.36e-05	0	0	0.00107897	0	0	0	0	0	0	0	0.00141143	0	0	0.0022973	0	0.00140321	0	0
ECP_HUMAN Eosinophil cationic protein OS=Homo sapiens GN=RNASE3 PE=1 SV=2	0.000570559	0	0	0.00069808	0.000416609	4.56e-05	0	9.7e-05	0.000105289	5.49e-05	0	0.000437254	0	0.000257782	0	0.000136631	9.87e-05	0	0.000506415	0	0.00125955	0.000149154	0	0.000121581	0.000500713	0	0.00109862	0.00022838	0.00100013	0.000123294	0.000589275	0.00053802	0.00328247	0	0.000378358	5.27e-05	0	0	0	0	6.13e-05	0.0012098	0.000272352	0.000954381	0.000168095	0.000308056	0	0	0.000508015
Metagenome unknown	0	0.000632911	0	0.000116347	9.26e-05	0.000501642	0	0	0.000842312	0	0	0	0.00202541	0.000257782	0	0	0	0	0.000506415	0	0	0.000484749	0	0.000243161	0	0	0.00116324	0	0	0.000410981	0	0	0	0.00445512	0	0	0	0	0	0	0	0.00221797	0.000194537	0	0.00173699	0	0.000488073	0	0.000677354
BLAST_PNP_LACP7 Polyribonucleotide nucleotidyltransferase OS=Lachnoclostridium phytofermentans (strain ATCC 700394 / DSM 18823 / ISDg) GN=pnp PE=3 SV=1_A9KNK6	0.00028528	0.000345224	0.000816891	0.00034904	9.26e-05	0.000456038	0.000283768	0.000679249	0.000596638	0.000329616	0.000237756	0.000728757	0.000644449	0.000515564	0.000371885	0.000136631	0.00187599	0.000616675	0.00033761	0.00013217	0	0.00022373	0.000514227	0.000364742	0	0.000937485	0.000129249	0.00022838	0.000130452	0.000164393	0.000107141	0.00017934	0.000108213	0.000243639	0.000189179	0.000526732	0.000269034	5.27e-05	0.000121758	3.2e-05	0.000888862	0.000151225	7.78e-05	0.000572628	0.000392223	0.000821482	0.000244036	0.000618397	5.64e-05
BLAST_YESO_BACSU Putative ABC transporter substrate-binding protein YesO OS=Bacillus subtilis (strain 168) GN=yesO PE=1 SV=2_O31518	0	5.75e-05	0.000816891	0	0	0.000456038	0.00127696	0.000533696	0.00143895	0	0.000118878	0.000242919	0.000552384	0.000257782	0	0.000819784	0.000592417	0	0.000506415	0	0	0.00022373	0	8.11e-05	0	0.000937485	0.000129249	0	0	0	0	0.00011956	0	0.00180989	0.000756716	0	0	0.00015797	0.00200901	0	0.000214553	0	0.000817057	0	0.000224127	0	0.00128119	0.000979129	0.0007338
BLAST_ARAA_GEOSE L-arabinose isomerase OS=Geobacillus stearothermophilus GN=araA PE=1 SV=2_Q9S467	0.00166413	0.000460299	0.000377027	0.000232693	0.00162014	0.000228019	0.000638479	0.00155257	0.000105289	0.000714168	0.000118878	0.00102026	0.000368256	0.000451118	0	0	0	0.000123335	0.00033761	0	0	0.000111865	0.000228545	0	3.85e-05	0.000542754	0.000193874	0.00129415	0	0.000493178	0	0.00041846	0.000613209	0.000139222	0.000189179	0	0	0.000105313	0.000121758	0.000991461	0.000429106	0.000856941	0	0	0.000224127	5.13e-05	0.000183027	0.000360732	0.000338677
ENO2_YEAST Enolase 2 OS=Saccharomyces cerevisiae (strain ATCC 204508 / S288c) GN=ENO2 PE=1 SV=2	0	0.000287687	0.000502702	0	0	0.000136811	0	0	0	0	0.000118878	0	0	0	0	0	0	0	0	0	0.000629776	3.73e-05	0	0	0	0	0.000129249	0	0	0	0.00514276	0	0.0032464	0	0.000567537	0.000632078	0	0.000105313	0	0.00198292	0.00101146	0	0.00167302	0.000381752	0.000336191	0.000102685	0	0.000618397	0
BLAST_AMIB_ECOLI N-acetylmuramoyl-L-alanine amidase AmiB OS=Escherichia coli (strain K12) GN=amiB PE=1 SV=2_P26365	0.00028528	0.00023015	0.000125676	0.00104712	0.000370319	0.000182415	0.000212826	0.000194071	0.000140385	0.000109872	0.000237756	0.000194335	0.00119683	0.000837791	0.000185943	0.000683153	0.000296209	0.000123335	0.000844024	0.00013217	0.000545806	7.46e-05	0.000571363	0.000162107	0.000539229	0.000197365	0.00071087	0.000418697	0.000434839	0.000287687	0.000749987	0.00023912	0.000504996	0.000104417	0.000252239	0.000474058	0.000269034	0.000473909	0.000547912	0.000447756	9.2e-05	0.000252042	0.000116722	0.00114526	0.000784446	0.000154028	0.000427064	0.000103066	0.000338677
BLAST_AHPC_SALTI Alkyl hydroperoxide reductase C OS=Salmonella typhi GN=ahpC PE=3 SV=2_P0A252	0	5.75e-05	0	0	9.26e-05	9.12e-05	0	0.000776285	0	0	0	0	0	0	0	0	0	0	0	0	0.000419851	0.00145425	0.000342818	0.000567376	0.000616262	0	0	0	0	0.000780865	0.000482134	0	7.21e-05	0	0	0.00284435	0.00309389	0.00131641	0	9.59e-05	0	0.00126021	0	0	0.00134476	0.000308056	0	0.000979129	0.000959585
Metagenome unknown	0.00860593	0	0	0.00442118	0	0	0	0.000485178	0	0	0	9.72e-05	0	0	0	0	0	0	0.00033761	0	0	0	0.000285682	0	0.000924392	0	0	0.00666108	0	0.000739767	0	0.00011956	0.00165927	0.00139222	0	0	0	5.27e-05	0	0	0	0	0.000116722	0	0.00330588	0	0	0	0
BLAST_MDH_RHIEC Malate dehydrogenase OS=Rhizobium etli (strain CFN 42 / ATCC 51251) GN=mdh PE=3 SV=1_Q2K3E9	0	0	0.000439864	0	0	0.00150493	0.0013479	0	0	0	0	0	0	0	0	0	0	0.00259004	0	0	4.2e-05	0.00275934	0	0.00149949	0	0	0	0	0.000304388	0	0	0	0	0	0	0	0.00443906	0	0	0	0.00450561	0	0.00322932	0	0	0.00195102	0	0	0
BLAST_YNBB_BACSU Uncharacterized protein YnbB OS=Bacillus subtilis (strain 168) GN=ynbB PE=4 SV=2_P94479	0.000380373	0.000575374	0.000377027	0.00104712	0.000370319	0.000273623	0.000212826	0.000242589	0.000245674	0.000384552	0.000713267	0.000340086	0.000736513	0.000451118	0.000557828	0.000683153	0.000691153	0.000616675	0.000844024	0.000528681	0.000293895	0	0.000457091	0.000162107	0.000154065	0.000246706	0.000193874	0.000190317	0.00021742	0.000246589	0.000321423	0.00035868	0.000180356	0.000174028	0.000630597	0.000158019	0.000538068	0.000315939	0.000426154	0	0.000214553	0.000252042	0.000194537	0.000190876	0.000336191	0.000410741	0.000305045	0.000309199	0.000225785
BLAST_GLNA3_DICDI Type-3 glutamine synthetase OS=Dictyostelium discoideum GN=glnA3 PE=1 SV=1_Q54WR9	0.000237733	0.000287687	0.000942566	0.000930774	9.26e-05	0.000228019	0.000354711	0.000727767	0.00038606	0.000659232	0.000475511	0.000340086	0.000276192	0.000837791	0.0013016	0.00122968	0.00128357	0.000863345	0.000675219	0.000396511	0.000125955	0.000111865	0.000114273	8.11e-05	0.000192582	0.000789461	0.000258498	0.00022838	0.000173936	0.000123294	0.000160711	5.98e-05	0.000288569	0.00205353	0.000315298	5.27e-05	0.000269034	0.000315939	0.000365275	9.59e-05	6.13e-05	0.000201633	7.78e-05	0.00114526	0.000280159	0.000154028	0.000183027	0.000463798	0.000112892
BLAST_RCC2_HUMAN Protein RCC2 OS=Homo sapiens GN=RCC2 PE=1 SV=2_Q9P258	0.000332826	0.00023015	6.28e-05	0.000465387	0.000370319	0.000136811	0.000177355	0.000291107	0.000140385	0.000219744	0.000594389	0.000194335	0.000552384	0.000386673	0.000743771	0.000409892	0.000394945	0.00024667	0.000675219	0.000396511	0.000461836	0.000111865	0.000171409	0.000283688	0.000192582	0.000197365	0.000581621	0.000304507	0.000260904	0.000164393	0.000214282	0.00065758	0.000360711	0.000174028	0.000441418	0.000210693	0.000538068	0.000263283	0.000487033	0.000255861	0.000153252	0.00030245	0.000272352	0.00171788	0.000504286	0.000308056	0.000366055	0.000206132	0.000282231
Metagenome unknown	0	0.000402762	0	0	4.63e-05	0	0	0.000824802	0	0	0	0.000971676	0	0	0	0.00150294	0	0	0	0.000793021	0	0	0	0	0	0	0	0	0	0.00863061	0	0	0.000108213	0	0	0	0	0	0.00304396	0	0	0	0	0	0.000336191	0	0	0	0.00169338
BLAST_SP39_RHILO Probable sugar-binding periplasmic protein OS=Rhizobium loti (strain MAFF303099) GN=mlr3050 PE=3 SV=2_Q98H33	0.0021396	0	0	0.000116347	0	0	3.55e-05	0	3.51e-05	0.000384552	0	0.000340086	0	0	0	0	0	0	0.000506415	0.000594766	0	0	0	0.00129686	7.7e-05	0.00103617	0	0	0	0.00320565	0	0	7.21e-05	0.00128781	0.000882835	0	0	0	0.00170462	0.000223878	0	0.00171388	0	0.000190876	0.00179302	0	0.00292844	0	0
Metagenome unknown	0.000380373	0.000575374	0.000377027	0.00104712	0.000370319	0.000273623	0.000212826	0.000242589	0.000245674	0.000384552	0.000713267	0.000340086	0.000736513	0.000451118	0.000557828	0.000683153	0.000691153	0.00049334	0.000844024	0.000528681	0.000293895	0	0.000457091	0.000162107	0.000154065	0.000246706	0.000193874	0.000152253	0.00021742	0.000246589	0.000321423	0.00035868	0.000180356	0.000174028	0.000630597	0.000210693	0.000538068	0.000315939	0.000426154	0	0.000214553	0.000252042	0.000194537	0.000190876	0.000336191	0.000410741	0.000305045	0.000309199	0.000225785
MEP1B_HUMAN Meprin A subunit beta OS=Homo sapiens GN=MEP1B PE=1 SV=3	0	0	0.000125676	0.000465387	0	0.000136811	0.000177355	0.000291107	0	0.000988848	0	4.86e-05	0	0.000257782	0.000557828	0.000683153	0.00167851	0.000616675	0	0.00026434	0	0.000410172	0.000399954	0.000121581	7.7e-05	0.000345389	0	0.00045676	0	0	0.00128569	0.00155428	0	0	0.000378358	0.000316039	0	0.000526565	0	0.000255861	0.00079691	0	7.78e-05	0.00267227	0	0.000564769	0.000122018	0.000257666	0
BLAST_ACDS_MEGEL Acyl-CoA dehydrogenase, short-chain specific OS=Megasphaera elsdenii PE=1 SV=1_Q06319	0	0.000345224	0	0.0017452	0	0.000684057	0.00195091	0	0.000982698	0.00126353	0.000118878	0.000291503	0.00046032	0.00232004	0	0.000956415	9.87e-05	0	0	0	0	0	0.000857045	0	3.85e-05	0.000937485	0.00122787	0	0	0.000575374	0.000321423	0.00053802	0.00151499	0	0.000693656	0	0	0.000210626	0	0.000799565	0	0	3.89e-05	0	0	0	0.000122018	0	0.000112892
ENOB_HUMAN Beta-enolase OS=Homo sapiens GN=ENO3 PE=1 SV=5	0	0.000460299	0	0.000116347	0	9.12e-05	0.000780363	0	0.00066683	0	0.000237756	0.00165185	0	0.000644454	0.000185943	0	9.87e-05	0	0	0.000330426	0	0.000671191	0	0.000121581	0	0.000641437	0.00109862	0.000494823	8.7e-05	0.000739767	0.00149997	5.98e-05	0	0.000382862	0	0	0.000134517	0.000737191	0.000304395	0.000159913	0.000490406	0.00030245	0.00046689	0	0.00134476	0.000667454	0.000122018	0.00118526	0
BLAST_FUB7_GIBF5 Sulfhydrylase FUB7 OS=Gibberella fujikuroi (strain CBS 195.34 / IMI 58289 / NRRL A-6831) GN=FUB7 PE=1 SV=1_S0DUX5	0.000237733	0.000690449	0.00175946	0.000465387	4.63e-05	0.000456038	0.000390182	0.000824802	0.000631734	0.000714168	0.0010699	0.000291503	0.00046032	0.000644454	0.000185943	0	9.87e-05	0.000123335	0.000506415	0.000198255	0	0.00175255	0.000685636	0.00141844	0	9.87e-05	6.46e-05	0	0	0.000123294	5.36e-05	0.00023912	0.000180356	0.000939751	0.00227015	0	0	0.000210626	0.000121758	6.4e-05	9.2e-05	0	0.000194537	0.000190876	0	0	0.000732109	0.000103066	0
BLAST_ILEU_HUMAN Leukocyte elastase inhibitor OS=Homo sapiens GN=SERPINB1 PE=1 SV=1_P30740	0	0	0.000125676	0	0	0.000684057	0.00067395	0	0.000245674	0.000219744	0	0.000340086	9.21e-05	0	0	0.000136631	0.000197472	0.00024667	0	0.000726936	0.000419851	0.000671191	0.0006285	0.000851064	0.000154065	0	0	0	0.000739227	0	0.00289281	0.00023912	0.00220034	0	6.31e-05	0	0.000403551	0.000210626	0.000121758	0.000255861	6.13e-05	5.04e-05	0.000194537	0	0	0	0.000122018	0.00180366	0.00152405
Metagenome unknown	0	0	0	0.000232693	0	0.00228019	0	0	0	0	0	0	0.000184128	0	0	0	0	0.00468673	0	0	0	0.00376613	0.000228545	0	0	0	0	0	0	0.0021371	0	0	0	0	0.000126119	0.000210693	0.000538068	5.27e-05	0	0	3.07e-05	0	0.00287915	0	0	0.00102685	6.1e-05	0	5.64e-05
Metagenome unknown	0.000332826	0.00023015	0	0.000465387	0.000370319	0.000136811	0.000177355	0.000291107	0.000105289	0.000219744	0.000594389	0.000194335	0.000552384	0.000386673	0.000743771	0.000819784	0.000296209	0.000370005	0.000844024	0.000330426	0.000461836	0.000111865	0.000171409	0.000243161	0.000192582	0.000148024	0.000516996	0.000304507	0.000260904	0.000123294	0.000214282	0.0005978	0.00032464	0.000174028	0.000315298	0.000158019	0.000807103	0.000210626	0.000426154	0.000223878	0.000153252	0.00030245	0.000272352	0.00171788	0.000448255	0.000308056	0.000305045	0.000206132	0.000282231
BLAST_ETFA_THETC Electron transfer flavoprotein subunit alpha OS=Thermoanaerobacterium thermosaccharolyticum (strain ATCC 7956 / DSM 571 / NCIB 9385 / NCA 3814) GN=etfA PE=3 SV=2_P71153	0.00028528	0.00132336	0.00131959	0.00139616	0	0.000273623	0.000390182	0.000485178	0.000421156	0.000219744	0.000118878	0.000923092	0.00101271	0.000128891	0.000185943	0	0.000296209	0.000123335	0.00033761	0.00026434	0	7.46e-05	0	0.000202634	0	0.00157892	0.000387747	0	0	0	0	0.00095648	0.000504996	0.000278445	0.000945895	0	0	0.000895161	6.09e-05	0	0.000367805	0.000252042	0.000272352	0	0.000168095	0.000102685	0.000793118	0.000103066	0.00180628
BLAST_PTAS_CLOTH Phosphate acetyltransferase OS=Clostridium thermocellum (strain ATCC 27405 / DSM 1237 / NBRC 103400 / NCIMB 10682 / NRRL B-4536 / VPI 7372) GN=pta PE=3 SV=1_O52593	0.00118866	0.000747986	0.000125676	0.000814427	0.000231449	0.000136811	0.000461124	0.000339624	0.00112308	0.000329616	0	0.00155468	0.000184128	0.000193336	0.00148754	0.00191283	0.000197472	0.00049334	0.000168805	0.00026434	0	0	0.000114273	0	0.000770327	0.00113485	0.000129249	0	0	0.000821963	0	0	0.000288569	0.00087014	6.31e-05	0.000105346	0.000134517	5.27e-05	0.000791428	0.000287843	0.000919512	0.000252042	3.89e-05	0	0.000392223	0	0.000183027	0	0.000112892
RECF_OPITP DNA replication and repair protein RecF OS=Opitutus terrae (strain DSM 11246 / JCM 15787 / PB90-1) GN=recF PE=3 SV=1	0.000380373	0.000575374	0.000377027	0.00104712	0.000370319	0.000273623	0.000177355	0.000242589	0.000245674	0.000329616	0.000713267	0.000340086	0.000644449	0.000451118	0.000185943	0.000683153	0.000691153	0.000370005	0.000675219	0.000528681	0.000293895	0	0.000457091	0.000162107	0.000154065	0.000246706	0.000193874	0.000152253	0.00021742	0.000246589	0.000321423	0.00035868	0.000180356	0.000174028	0.000630597	0.000158019	0.000538068	0.000315939	0.000426154	0	0.000214553	0.000252042	0.000194537	0.000190876	0.000336191	0.000410741	0.000305045	0.000309199	0.000225785
Metagenome unknown	0.000380373	0.000575374	0.000377027	0.000930774	0.000370319	0.000273623	0.000177355	0.000242589	0.000245674	0.000329616	0.000713267	0.000340086	0.000644449	0.000451118	0.000185943	0.000683153	0.000691153	0.000370005	0.000675219	0.000528681	0.000293895	0	0.000457091	0.000162107	0.000154065	0.000246706	0.000193874	0.000152253	0.00021742	0.000246589	0.000321423	0.00035868	0.000180356	0.000174028	0.000630597	0.000158019	0.000538068	0.000315939	0.000426154	0	0.000214553	0.000252042	0.000194537	0.000190876	0.000336191	0.000410741	0.000305045	0.000309199	0.000225785
BLAST_MDH_RICCK Malate dehydrogenase OS=Rickettsia canadensis (strain McKiel) GN=mdh PE=3 SV=1_A8EZ58	0	0	0	0	0	0.00132251	0.00127696	0	0	0	0	0	0	0	0	0	0	0.00259004	0	0	4.2e-05	0.00361697	0	0.00113475	0	0	0	0	0.000260904	0	0	0	0	0	6.31e-05	0	0.00309389	0	0	0	0.00441366	0	0.00252899	0	0	0.00184833	0	0	0
BLAST_PCCB_RHOS4 Propionyl-CoA carboxylase beta chain OS=Rhodobacter sphaeroides (strain ATCC 17023 / 2.4.1 / NCIB 8253 / DSM 158) GN=pccB PE=1 SV=1_Q3J4E3	0	0.000632911	0	0	0.00328658	0.000638453	0.000177355	0.000388142	0	5.49e-05	0	9.72e-05	0	0	0	0.000136631	0.000296209	0.00148002	0.000168805	0.000330426	0	0.00167798	0.000171409	0.000283688	0.000462196	0.00128287	0	0	0	0.000164393	0	5.98e-05	0.000504996	0.000904946	0	0	0.000134517	0	0.000365275	0.000415774	0.000275854	0.000756125	0.00031126	0.000190876	0.000336191	0.00097551	0.000366055	0.000309199	0.000564462
BLAST_DHE4_PRERU NAD(P)-specific glutamate dehydrogenase OS=Prevotella ruminicola GN=gdhA PE=1 SV=1_P95544	0.00028528	0.000863061	0.000502702	0	0.00162014	0.000638453	0.000744892	0.000388142	0.000140385	0.000439488	0.000118878	0.000680173	0	0.0007089	0.000743771	0.000683153	0.000296209	0.00185002	0.00118163	0.000528681	0	0.000410172	0	0.000526849	0.000346647	0.000444072	0	0.000190317	0.000260904	0.000575374	0	0.00023912	0.000288569	0.000487279	0.000441418	0.000105346	0.00094162	0	0.000121758	6.4e-05	0.000337154	0.000201633	0.000505797	0	0	0.000462083	0.000183027	0.000206132	0.000112892
BLAST_YFEC_YERPE Chelated iron transport system membrane protein YfeC OS=Yersinia pestis GN=yfeC PE=3 SV=1_Q56954	0.000380373	0.000575374	0.000377027	0.00104712	0.000370319	0.000273623	0.000212826	0.000242589	0.000245674	0.000384552	0.000713267	0.000340086	0.000736513	0.000451118	0.000557828	0.000409892	0.000592417	0.000370005	0.000675219	0.000528681	0.000293895	0	0.000457091	0.000162107	0.000154065	0.000246706	0.000193874	0.000152253	0.00021742	0.000246589	0.000321423	0.00035868	0.000180356	0.000174028	0.000630597	0.000158019	0.000403551	0.000315939	0.000426154	0	0.000214553	0.000252042	0.000194537	0	0.000336191	0.000359398	0.000305045	0.000309199	0.000169338
Metagenome unknown	0	0	0	0.00034904	0	0	7.09e-05	0	0	0	0	4.86e-05	0.000276192	6.44e-05	0	0	0	0	0	0.00013217	0.0011336	3.73e-05	0.000685636	0.00174266	0.000924392	0.000148024	0.000452372	0.00110384	0.00147845	0.00119185	0.000214282	0.00011956	0.000180356	0	0.000189179	0.000210693	0	0.00015797	0.000365275	0.000895513	0	0.000151225	0.000116722	0.000190876	5.6e-05	0.000102685	0.000122018	5.15e-05	5.64e-05
BLAST_NGAL_HUMAN Neutrophil gelatinase-associated lipocalin OS=Homo sapiens GN=LCN2 PE=1 SV=2_P80188	0.000855839	0.000632911	0	0.000232693	0.000462899	0.000866472	0.000248297	0.000727767	0.000175482	0.000109872	0	0.000145751	9.21e-05	0.000386673	0	0.000136631	9.87e-05	0	0.000506415	0	0.000671761	0.00022373	0.000228545	0.000121581	0.000770327	9.87e-05	0	3.81e-05	0.00143497	8.22e-05	0.00166069	0.00017934	0.00180356	0	0.000378358	0.000316039	0	0.000263283	0.000243516	0.000447756	0	0.000352858	0.00015563	0.000572628	0.000168095	5.13e-05	0.000122018	0.000206132	0.000790246
BLAST_RRBR1_CLOAB Reverse rubrerythrin-1 OS=Clostridium acetobutylicum (strain ATCC 824 / DSM 792 / JCM 1419 / LMG 5710 / VKM B-1787) GN=rbr3A PE=1 SV=1_Q97D82	4.75e-05	0.000517837	0.00106824	0	0.000370319	0.000410434	0.000248297	0.00126146	0.00066683	0.00027468	0	0.000242919	0.000736513	0.000257782	0.000371885	0	0.000394945	0.00024667	0.000168805	0.00013217	0	0	0.000285682	0.000607903	7.7e-05	0.000542754	0.000193874	0	0.000130452	0.000287687	0.000428564	0.00017934	0.00064928	0.000208834	6.31e-05	0	0	0	0.000243516	9.59e-05	0.000214553	0.000151225	0.000116722	0.000572628	0.000224127	0.000102685	0.000122018	0.00180366	0.000508015
BLAST_SUSB_BACTN Glucan 1,4-alpha-glucosidase SusB OS=Bacteroides thetaiotaomicron (strain ATCC 29148 / DSM 2079 / NCTC 10582 / E50 / VPI-5482) GN=susB PE=1 SV=1_G8JZS4	0.00014264	5.75e-05	0.000188513	0	0.000648058	0.000319227	0	0.000194071	0.000140385	0	0.000118878	9.72e-05	9.21e-05	0.00199781	0.000557828	0	0	0.00111002	0	6.61e-05	0.00016794	0.000596614	0.000228545	0.000121581	0.000115549	0.000296048	0.000129249	0.00022838	0.000260904	0.000246589	0	0.00041846	0.000144285	0.000591695	0.000378358	0	0.000134517	0.000368596	6.09e-05	0.00012793	0.000429106	0.000504083	0.00046689	0.000190876	0.000280159	0.000462083	0.000244036	5.15e-05	0.000112892
FLNC_HUMAN Filamin-C OS=Homo sapiens GN=FLNC PE=1 SV=3	0.000523013	0	0	0.000232693	0	0	7.09e-05	0	0.00245674	0	0	0	0	6.44e-05	0	0.000819784	0.000296209	0	0	0	0.00016794	0	0	0.000445795	0	0	0.00329585	0.000532887	0	0.000328785	0.000160711	0	0	0	0	0	0.000403551	0	6.09e-05	0.00086353	0	0	0.00015563	0	0	0	6.1e-05	0	0.000282231
BLAST_MYL6_RAT Myosin light polypeptide 6 OS=Rattus norvegicus GN=Myl6 PE=1 SV=3_Q64119	0	5.75e-05	0	0.000116347	0	4.56e-05	0.000354711	4.85e-05	0.00066683	0	0	4.86e-05	0	0.000386673	0	0	0	0	0	0.000462596	0	0.000335595	0	0.000405268	0	0.000296048	0.00129249	0.00079933	0	0.000698668	0.000374993	5.98e-05	0.000216427	0	0	0	0.00255582	0	0	6.4e-05	0.00101146	0.000806533	0.000194537	0	0.000280159	0.000308056	0	0.00113373	0
Metagenome unknown	0.00171168	0	0	0	0	0	0	0	0	0	0	0	0	0	0.000929714	0	0	0	0	0	0	0	0	0	3.85e-05	0	0	0	0	0	0.000374993	0.00041846	0	0	0.000882835	0	0.000672585	0	0	0.000319826	0	0	0	0	0	0	0.000122018	0	0
Metagenome unknown	0	0	0.000377027	0	0	0	0	0	0.00473801	0.00450475	0.000118878	9.72e-05	0.00322224	6.44e-05	0.00427668	0	9.87e-05	0	0	0	0	0	0	0	0	0.000197365	0	3.81e-05	0	0	0	0	0	0.00201872	0	0	0	0	0	0	0	0	0	0.00209964	0	0	0	0.00231899	0
BLAST_KCRM_HUMAN Creatine kinase M-type OS=Homo sapiens GN=CKM PE=1 SV=2_P06732	0	0.000115075	0	0	0	0	0.000425653	0	0.000701927	0	0	0.000145751	9.21e-05	0.000644454	0	0	0.000296209	0	0	0	0	0.000261019	0	0.000851064	0.000192582	0.000296048	0.000516996	0.000380633	0	0.000410981	0.000428564	5.98e-05	0	3.48e-05	0	0	0.000807103	0.000368596	0.000304395	3.2e-05	0.000337154	0.000403266	0.000272352	0.000381752	0.000784446	5.13e-05	0.000244036	0.00108219	5.64e-05
BLAST_SUSC_BACTN TonB-dependent receptor SusC OS=Bacteroides thetaiotaomicron (strain ATCC 29148 / DSM 2079 / NCTC 10582 / E50 / VPI-5482) GN=susC PE=1 SV=1_Q8A1G1	0	0.000172612	0	0.000814427	0	0.000410434	0.000709421	0.000582213	0	0	0	9.72e-05	0	0	0.0026032	0.0017762	0	0.00234337	0	0.00026434	0	0	0.00108559	0.00283688	0.000462196	0	0.000258498	3.81e-05	0.00500065	0	0	0.00011956	0	0.00142703	0.000567537	0	0	0	0	0.00137525	6.13e-05	0	0	0	0	0	0.000305045	0	0
BLAST_RS2_BIFAA 30S ribosomal protein S2 OS=Bifidobacterium adolescentis (strain ATCC 15703 / DSM 20083 / NCTC 11814 / E194a) GN=rpsB PE=3 SV=2_A1A1H9	0.000427919	0.00126582	0.000502702	0.00127981	0.00124983	0.00100328	0.00230562	0.000533696	0.000631734	0.00027468	0.0010699	9.72e-05	0.00239367	0.00161114	0	0	9.87e-05	0	0	0.000198255	0	0	0.001257	0	0.000462196	0.000493413	0.00071087	0.000152253	0	0	0.000749987	0.0011956	0.000432854	0	0.00107201	0	0	0.00115844	0	0	0	0.000100817	0	0	0	0	0.000183027	0	0
BLAST_UXAC_EUBE2 Uronate isomerase OS=Eubacterium eligens (strain ATCC 27750 / VPI C15-48) GN=uxaC PE=3 SV=1_C4Z5P8	0	0.000402762	0.000377027	0.000116347	0.00111096	0.00036483	0.000709421	0.000339624	0.000315867	0	0	0.000291503	0.000276192	0.000128891	0	0.000136631	0.000691153	0.00024667	0	0.000462596	0	0	0	0.000405268	0	9.87e-05	0.000129249	0	0	0	0	0.00107604	0	0.00055689	0.00107201	0	0.000134517	0.000737191	0.000791428	0	0.000122602	0.000252042	0.000505797	0	0.000224127	0.00112954	0.000732109	0.000618397	0.000790246
Metagenome unknown	0.00028528	0.00023015	0.000754053	0.000930774	0.000185159	0.000182415	0.000354711	0	0	0	0.000356633	4.86e-05	0	0.00148225	0.00278914	0.000546523	0.000197472	0	0.00101283	0	0	0	0.000342818	0.000324215	0.00389015	0.000296048	0	0.000152253	0.000434839	0.000780865	0	0	3.61e-05	0.00271484	0	0.000474058	0	0.000315939	0.000182637	0	0	0.000554491	0	0	5.6e-05	0	0.000549082	0	0
BLAST_DGAL_SALTY D-galactose-binding periplasmic protein OS=Salmonella typhimurium (strain LT2 / SGSC1412 / ATCC 700720) GN=mglB PE=1 SV=2_P23905	4.75e-05	0.000287687	0.000377027	0	0	9.12e-05	0.000354711	0.000291107	0.000210578	5.49e-05	0.000475511	0.000194335	0.000552384	6.44e-05	0	0.00109304	0	0	0	0.000660851	0	3.73e-05	5.71e-05	0	7.7e-05	0.000197365	0.00103399	0.000723203	0	0	0	0.0008967	0.000937849	0.000591695	0.000189179	0	0.000269034	0.000105313	0.00121758	0	0.000183902	0	7.78e-05	0	0.0012327	0	0.000366055	0.000257666	5.64e-05
BLAST_YOE2_STRAT Uncharacterized lipoprotein in oleD 5region OS=Streptomyces antibioticus PE=3 SV=1_Q53684	0.00014264	0	0.000691215	0.000116347	0	0.00036483	0.000354711	0.000291107	0.00143895	0	0.000118878	0	0.000552384	0	0	0.000136631	0.000592417	0.00024667	0.000675219	0	0	7.46e-05	0	0.000567376	0	0.000888143	0.000129249	0	0	4.11e-05	0	0.00101626	0.000108213	0.00118339	0.000441418	0	0	0.000210626	0.00133934	0	0.00113407	5.04e-05	0.000700335	0	0.000224127	5.13e-05	0.000244036	0.00154599	0.000508015
BLAST_RL7_BACV8 50S ribosomal protein L7/L12 OS=Bacteroides vulgatus (strain ATCC 8482 / DSM 1447 / JCM 5826 / NBRC 14291 / NCTC 11154) GN=rplL PE=3 SV=1_A6KYK4	0	0	0	0	0	0.00036483	0.000212826	0	0	0	0	0	0	0	0	0	0	0.00074001	0	0	0.000293895	0.00309494	0	0.000486322	0	0	0	0	0	0	0	0.0002989	0	0	0	0.000737424	0.00295938	0	6.09e-05	0	0.00174707	0.000201633	0.00136176	0	0.000392223	0.000513426	0	0	0
Metagenome unknown	0.00028528	0.00023015	0.000251351	0.00069808	0.000231449	0.000456038	0.000106413	0.000970356	0.000596638	0.00027468	0.000356633	0.000971676	0.000184128	0	0.000743771	0.000546523	0.000888626	0.000370005	0.000675219	0.000594766	0.000125955	0.000111865	0.000342818	0.000121581	0.000154065	0.000641437	0.000323123	0.000152253	0.000173936	0.000205491	0.000267852	0	0.00032464	0.00031325	0.000378358	0	0.000403551	0.000263283	0.000365275	0.000159913	0.000153252	0.000201633	0.00015563	0.000954381	0.000280159	0.00020537	0.000427064	0.000257666	5.64e-05
BLAST_KDGK_THET8 2-dehydro-3-deoxygluconokinase OS=Thermus thermophilus (strain HB8 / ATCC 27634 / DSM 579) GN=kdgK PE=1 SV=1_Q53W83	0	0.00023015	0.000251351	0.000116347	0.00013887	0.00036483	0.00067395	0.000194071	0	0	0	0.000340086	0	0.000386673	0.000929714	0.000409892	0	0.000863345	0.000506415	0	0	0.000596614	0.000571363	0.000202634	0.000192582	0.000345389	0.000258498	0.000266443	0.00113058	0.000123294	0	0	7.21e-05	0.000765723	6.31e-05	0.000263366	0.00094162	5.27e-05	0.000852307	0.00086353	0.000306504	0.00030245	0.000389075	0	0.000392223	0.000667454	0.000305045	0.000566864	0.000225785
BLAST_G6PI_BACFR Glucose-6-phosphate isomerase OS=Bacteroides fragilis (strain YCH46) GN=pgi PE=3 SV=1_Q64PM7	0	0.000115075	0.000125676	0	0	0.00132251	0.000461124	0.000194071	0.000140385	0	0	0.00038867	0	0	0	0	9.87e-05	0.00074001	0	0.000462596	0	0.0022373	0.000457091	0.000486322	0.000308131	0.000444072	0	0	8.7e-05	0.000410981	0	0	0.000288569	0.00174028	0	5.27e-05	0	0	0.000304395	0	0.00214553	0.000453675	0.00186756	0	0	0.000718797	6.1e-05	0.000618397	0.00169338
KLK1_PAPHA Kallikrein-1 OS=Papio hamadryas GN=KLK1 PE=2 SV=1	0	0.000287687	0.00056554	0.000116347	0.000555478	0.000638453	0.000425653	0.000679249	0.000701927	0.000604296	0	0.000680173	0.000368256	0.000644454	0	0	9.87e-05	0	0	0	0.000587791	3.73e-05	0.000171409	0.000121581	0.000808843	0.000197365	0.000193874	0.000152253	4.35e-05	0.000246589	0.000160711	0.0005978	0.000144285	0	0.000378358	0.000368712	0.000403551	5.27e-05	0.000487033	0.000191896	0	0.000403266	0.000427982	0	0	0.000256713	0.000610091	0.000257666	0.000282231
BLAST_DGAL_SALTY D-galactose-binding periplasmic protein OS=Salmonella typhimurium (strain LT2 / SGSC1412 / ATCC 700720) GN=mglB PE=1 SV=2_P23905	0	0.000287687	0.000754053	0	0	0.00095768	0.00127696	0.00111591	0.00263223	0.00027468	0	0.000194335	0.00119683	0.000580009	0	0.000136631	0.000789889	0.00024667	0.00101283	0	0	0.000261019	5.71e-05	4.05e-05	0	0.000493413	0.000387747	0	0	0	0	0.0005978	0	0.00142703	0.000504477	0	0.000134517	5.27e-05	0.00164374	0	0.000398455	0	0.000544705	0	0.000336191	0	0.000488073	0.000103066	0
BLAST_LAMB_PHOLL Maltoporin OS=Photorhabdus luminescens subsp. laumondii (strain DSM 15139 / CIP 105565 / TT01) GN=lamB PE=3 SV=1_Q7N987	0	0	0	0	0	0	0	0	0	0	0	0	0	0	0	0	0	0	0	0	0.000713746	0.00261019	0	0	0	0	0	0	0	8.22e-05	0	0	0	0	0	0.00126416	0.00295938	0.000789848	0	0	0	0.00574655	0	0	0.00341794	0	0	0.000103066	0
BLAST_YDJI_BACSU Uncharacterized protein YdjI OS=Bacillus subtilis (strain 168) GN=ydjI PE=4 SV=1_O34789	0.00109357	0.000517837	0.000377027	0.000232693	0.00129612	0.000319227	0.00031924	0.000291107	0.000245674	0.000384552	0.000475511	0.000340086	0	0.000386673	0.000185943	0.000546523	0.000197472	0.000123335	0.00118163	6.61e-05	0.00172139	0	0	4.05e-05	0.000924392	9.87e-05	0.000258498	0.000380633	0.00173936	0	0.000321423	0.00047824	0.000144285	0.000243639	0	0.000632078	0	0	0.000487033	0.0012793	3.07e-05	0.000151225	0.00015563	0.000381752	0	0.000308056	0	5.15e-05	0
BLAST_DFX_PELCD Desulfoferrodoxin OS=Pelobacter carbinolicus (strain DSM 2380 / NBRC 103641 / GraBd1) GN=dfx PE=3 SV=1_Q3A221	0	0	0	0	0.00162014	0.00141372	0.00145431	0	0	0	0	0	0	0	0	0	0	0.00197336	0	0	0	0.00272205	0	0.00186423	0	0	0	0	0.000304388	0.000410981	0	0.00011956	0	0	0	0	0.00134517	0	0	0	0.00226813	0	0.00167302	0	0	0.000564769	0	0	0
BLAST_RS2_BACFR 30S ribosomal protein S2 OS=Bacteroides fragilis (strain YCH46) GN=rpsB PE=3 SV=1_Q64P29	0	0.000632911	0	0	0.000833218	0.00177855	0.00138337	0.000145553	7.02e-05	0	0	9.72e-05	0	0	0	0	0	0.00308337	0.000168805	0.00013217	4.2e-05	0.00123052	0.000342818	0.000729483	0	4.93e-05	0	0	0	0.000164393	5.36e-05	0	0.000216427	0.000417667	0	0.000105346	0.000672585	0	0	6.4e-05	0.00153252	0.000403266	0.0026068	0	0	0.00148894	0	0.000154599	0.000225785
PIP_HUMAN Prolactin-inducible protein OS=Homo sapiens GN=PIP PE=1 SV=1	0	0	0	0	0.000231449	0	0	0	0	0	0	0	0	0	0	0	0	0	0	0.000330426	0	0	0	8.11e-05	0.00042368	0	0.000581621	0.000304507	0	0	0	0	0	0	0	0.000210693	0.00295938	0	0	0	0	0	0.000544705	0	0	0.000256713	0	0	0.000451569
BLAST_IMDH_STRP3 Inosine-5-monophosphate dehydrogenase OS=Streptococcus pyogenes serotype M3 (strain ATCC BAA-595 / MGAS315) GN=guaB PE=3 SV=1_P0DB88	0	0	0	0	0	0.000638453	0.00131243	0	0	0	0	0	0	0	0	0.000136631	0.000197472	0.00098668	0	0	0	0.00283392	0	0.00158055	0.000154065	0	0	0	0	0	0	0	7.21e-05	0.000382862	6.31e-05	0	0.000134517	0	6.09e-05	0	0.0038926	0	0.00163411	0	0	0.000667454	0	0.000206132	0
BLAST_ARCA_TREDE Arginine deiminase OS=Treponema denticola (strain ATCC 35405 / CIP 103919 / DSM 14222) GN=arcA PE=3 SV=1_Q73QJ2	0.000998479	0.000287687	0.000188513	0.000465387	0	9.12e-05	0.00102866	4.85e-05	0.000210578	0.00054936	0	0.000485838	0.000736513	0.000386673	0	0	0	0	0	6.61e-05	0	0	0.000171409	0	0.000192582	0.000789461	0.000129249	0.00011419	0	0.00267138	0	5.98e-05	0	0.000139222	0	0	0	0	0.00334835	0	0.000245203	0	0	0	0	0.000462083	0.000793118	0	0.000282231
BLAST_G3P_CORGL Glyceraldehyde-3-phosphate dehydrogenase OS=Corynebacterium glutamicum (strain ATCC 13032 / DSM 20300 / JCM 1318 / LMG 3730 / NCIMB 10025) GN=gap PE=3 SV=2_Q01651	0.000475466	0.000460299	0.000377027	0.000581734	0.000416609	0.000319227	0.00031924	0.000388142	0.000421156	0.000439488	0.000475511	0.00038867	0.00046032	0.000515564	0.00111566	0.00109304	0.000691153	0.000616675	0.00101283	0.000528681	0.00025191	0.000149154	0.000285682	0	7.7e-05	0.000592096	0.000129249	0.00022838	0	0.000287687	0.000214282	0.00017934	0.000216427	0.000243639	0.000189179	0	0.000403551	0	0.000304395	0.000191896	0.000153252	0.000352858	0.00015563	0	0.000448255	0.000154028	0.000366055	0.000257666	0.000112892
Metagenome unknown	0.000190186	0.000172612	0.000125676	0.00034904	0.000324029	0.000136811	0.000141884	0.000291107	0.000105289	0.000219744	0.000475511	4.86e-05	0.000552384	0	0.000371885	0	9.87e-05	0.000123335	0.000168805	0.00013217	0.000587791	3.73e-05	0.000342818	0.000283688	0.000192582	4.93e-05	0.00071087	0.000418697	0.000260904	0	0.000107141	0.00053802	0.000252498	0.000174028	0.000882835	0.000316039	0.000269034	0.000368596	0.000608791	0.000255861	0.000153252	0.000201633	7.78e-05	0.000381752	0.000168095	0.00020537	0.000244036	0.000103066	0.000169338
Metagenome unknown	0.000190186	0	0	0	0	0	0	0	0.000350963	0.00203263	0	0	0	0	0	0.00259598	0.000394945	0	0	0.000859107	0	0.00156611	0	0.00214792	0	0	0.000193874	0	0	0	0.000321423	0	0	0.00233198	0.000945895	0	0.00094162	0	0	0	0	0	0	0	0	0	0	0	0
BLAST_YQEN_BACSU Uncharacterized protein YqeN OS=Bacillus subtilis (strain 168) GN=yqeN PE=1 SV=1_P54459	0.000332826	0.000115075	0	0.00034904	0.000324029	0.000136811	0.000177355	0.000145553	0.000105289	0.000164808	0.000594389	0.000194335	0.000552384	0.000257782	0.000185943	0.000136631	0.000296209	0.000123335	0.000506415	0.000198255	0.000587791	7.46e-05	0.000171409	0.000283688	0.000192582	0.000197365	0.000646245	0.000380633	0.000260904	0.000164393	0.000214282	0.0005978	0.00032464	0.000174028	0.000378358	0.000210693	0.000134517	0.000210626	0.000426154	0.000319826	0.000122602	0.000252042	0.000233445	0.000572628	0.000336191	0.000256713	0.000366055	0.000206132	0.000225785
BLAST_FUCO_ECOLI Lactaldehyde reductase OS=Escherichia coli (strain K12) GN=fucO PE=1 SV=2_P0A9S1	0	0.000460299	0.000942566	0	9.26e-05	0.000820868	0.000603008	0.000679249	0.00140385	0.00027468	0	0.000534422	0.000920641	0	0	0	0.00148104	0.000123335	0	0.00026434	0	0.00022373	0	0.000121581	0	0.000888143	0.000387747	0	4.35e-05	0.000369883	0	0.00011956	0.000108213	0.00118339	0.000315298	0	0	0.000210626	0.000608791	0	0.000704959	0.000201633	0.00015563	0	0.000112064	0.000308056	0.000854127	0.000566864	0
Metagenome unknown	0	0	0	0	0.000416609	0.000228019	0	0	0.000105289	0.000604296	0	0	0.000552384	0.000386673	0	0	0.00197472	0.00148002	0	6.61e-05	0	0	0	0	0	0	0.000581621	0	0	0	0	0.0014945	0	0	0	0	0.00107614	0.000842504	0.00066967	0	0.000367805	0.00030245	0	0	0.00117667	0.000667454	0	0	0.00124182
BLAST_FTN_BACF6 Bacterial non-heme ferritin OS=Bacteroides fragilis (strain 638R) GN=ftnA PE=2 SV=1_E1WS50	9.51e-05	0.00023015	0.000502702	0.00186155	0.000277739	0.000136811	0.00031924	0.000630731	0.000105289	0.000109872	0.000356633	0.00121459	0.000552384	0	0.00167348	0.000409892	0.000197472	0	0	0.000594766	0	0	0.000457091	0.000283688	0	4.93e-05	0.00122787	0	0.000173936	0.00147953	0	0.00047824	0.000541067	0.00055689	0.000567537	0	0	0.000263283	6.09e-05	0.00012793	0	0.000856941	0	0	0.000112064	0	0.000549082	0	0.000169338
Metagenome unknown	0.000190186	0.000115075	0.000188513	0.000581734	0.000277739	0.000136811	7.09e-05	0.000242589	0.000175482	0.000109872	0.000118878	0.000145751	0.00119683	0.0007089	0.000371885	0.000546523	0.000394945	0.000123335	0.000506415	0.00013217	0.000545806	3.73e-05	0.000571363	0.000121581	0.000462196	4.93e-05	0.000516996	0.000380633	0.000434839	0.000205491	0.000696416	0.0002989	0.000468925	3.48e-05	0.000252239	0.000263366	0.000134517	0.000368596	0.000304395	0.000479739	6.13e-05	0.000151225	0.000116722	0.000763504	0.00061635	0.000102685	0.000366055	0.000103066	0.000338677
BLAST_MGTA_MYCS2 GDP-mannose-dependent alpha-mannosyltransferase OS=Mycobacterium smegmatis (strain ATCC 700084 / mc(2)155) GN=mgtA PE=3 SV=1_A0QRG8	0.000190186	0.000345224	0.000314189	0.000232693	9.26e-05	0.000410434	0.000141884	0.000339624	0.000245674	0.000384552	0.000356633	0.000340086	0.000736513	0	0.000743771	0.000546523	0.000394945	0.000616675	0.000675219	0.000594766	0.000713746	0.000186442	0.000228545	0.000121581	0.000231098	0.000345389	0.000258498	0.000266443	0.000173936	0.000287687	0.000107141	0.0002989	0.000216427	0.000243639	0.000189179	0	0.000538068	0.00015797	0.000426154	0.000159913	0.000214553	0.00030245	0.000350167	0.000572628	0.000448255	0.000359398	0.000244036	0.000257666	0.000225785
Metagenome unknown	0	0	0	0	0.00796186	0.014502	0	0	0	0	0	0	0	0	0	0	0	0	0	0	4.2e-05	0.00115594	0	0	0	0	0	0	8.7e-05	0	0.000160711	0	0	0	0	0	0	0	0	0	0	0	0	0	0	0	0	0	0
Metagenome unknown	0	0	0.000314189	0	0	0	0.000709421	0	0	0.000384552	0	0	0.00046032	0	0	0	0.00118483	0	0	0.00112345	0	0.000111865	0	0	0	0.00217102	0	0	0	0	0	0	0	0	0	0	0	0	0	0	0.000275854	0.00211715	0	0	0	0.000154028	0.000488073	0	0
BLAST_Y568_HAEIN Uncharacterized protein HI_0568 OS=Haemophilus influenzae (strain ATCC 51907 / DSM 11121 / KW20 / Rd) GN=HI_0568 PE=4 SV=1_P71353	0	0.000345224	0.000691215	0	0	0.000684057	0.00099319	0.000388142	0.00066683	5.49e-05	0	0.000194335	0	0	0	0	0.000394945	0.00111002	0	0.000198255	0	0.00119323	0	0.000445795	3.85e-05	0.00039473	0.000129249	7.61e-05	0	8.22e-05	5.36e-05	0	0.000216427	0.00135742	0	0	0.000269034	5.27e-05	0	0.00012793	0.00165512	0.000403266	0.00116722	0	5.6e-05	0.000256713	0	0.000566864	0.000338677
ANXA2_RAT Annexin A2 OS=Rattus norvegicus GN=Anxa2 PE=1 SV=2	0.00133131	0	0	0	0	0.000912076	0	0.000727767	0	0.000109872	0	0	9.21e-05	6.44e-05	0	0.000136631	0.000789889	0.00024667	0.000168805	0	0.00176337	0.000745768	0.000742772	0.00308004	0.000808843	0	0.000129249	0.00079933	0	0	0.00123212	0.00011956	0	0	0.000315298	0.000316039	0	0.000631878	0	0.000159913	9.2e-05	0	0.000116722	0	0	0.000564769	6.1e-05	0.000515331	0.000225785
BLAST_PDXB_SHESM Erythronate-4-phosphate dehydrogenase OS=Shewanella sp. (strain MR-4) GN=pdxB PE=3 SV=1_Q0HKB6	0.000190186	5.75e-05	0.00056554	0	4.63e-05	0.000182415	0.000390182	9.7e-05	0.000210578	0	0	0.00038867	0	0	0.000929714	0.00109304	0	0.00074001	0.000675219	6.61e-05	0	0.00130509	0.000457091	0	0.00115549	0.000148024	0	0.000266443	0.000869679	0.000164393	0	0	0.00064928	0.00118339	0.000126119	0	0.000538068	0	0.000121758	0.000799565	0.00153252	5.04e-05	0.000505797	0.000190876	0.000168095	0.00020537	0.000427064	0.000103066	0.000395123
Metagenome unknown	0	0.00023015	0.000125676	0.00069808	0	0	0	0	0	0	0	0.000340086	0.000184128	0	0.00204537	0.00136631	0	0	0.000675219	0	0	0	0.00142841	0	0.00161769	0	0	7.61e-05	0.00113058	0.000986355	0	0.00011956	0.000721423	0.000591695	0	0.000368712	0	0	0	0	0	0.000655308	0	0	0.000280159	0	0.000732109	5.15e-05	0.000451569
FRUE_BIFLO Fructose import binding protein FruE OS=Bifidobacterium longum (strain NCC 2705) GN=fruE PE=1 SV=1	0.000475466	0.000863061	0.000125676	0.00139616	0.000416609	0.000638453	0.00163167	0.00126146	0.000561541	0.00164808	0	0	0.00193335	0.00199781	0	0	0	0	0.000168805	0	0	0	0.00131414	0	0	0	0	0.000761267	0	0	0.000321423	0.00023912	0.000504996	6.96e-05	0.000441418	0	0	0.000105313	0	0	0	0	0	0	0	0	0.000305045	0	0.000225785
BLAST_RS3_CLOB8 30S ribosomal protein S3 OS=Clostridium beijerinckii (strain ATCC 51743 / NCIMB 8052) GN=rpsC PE=3 SV=1_A6LPR7	0.000523013	0.000747986	0.000251351	0	0.000185159	0.000684057	0.00031924	0.000679249	0.000631734	0.000439488	0	0.000631589	0.00046032	0.000773345	0	0.000819784	0.00207346	0.00024667	0.00202566	0	0	0.000186442	0	0	0	0.000740119	0	0	0	0	0.000214282	0.0008967	0	0.000626501	0.000252239	0	0	0.000210626	0	0	0.000521057	0.000201633	0.000194537	0	0	0.000308056	0.000244036	0.000721464	0
Metagenome unknown	0	0.000805524	0	0	0	0	0	0.0057251	0	0	0	0	0	0	0.000929714	0.00423555	0	0.000123335	0	0	0	0	0	0	0	0	0.000581621	0	0	0	0	0	0.00317426	0	0	0	0	0	0	0	0	0.000100817	0	0	0.00156889	0.000410741	0	0	0.000112892
BLAST_TPT_MAIZE Triose phosphate/phosphate translocator, chloroplastic OS=Zea mays GN=TPT PE=1 SV=1_P49133	0.00028528	0.000287687	0.000314189	0.000465387	0.000231449	0.000273623	0.000212826	0.000145553	0.000175482	0.000219744	0.000475511	0.000194335	0	0.000193336	0.000743771	0.000409892	9.87e-05	0.000616675	0.000675219	0.00026434	0.000545806	0.000186442	0.000399954	0.000202634	0.000231098	0.000197365	0.000258498	0.000266443	0.000260904	0.000328785	0.000267852	0.00023912	0.000252498	0	0.000315298	0.000210693	0.000672585	0.000210626	0.000243516	0.000191896	9.2e-05	0.000252042	0.000233445	0.000954381	0.000224127	0.000256713	0.000183027	0.000206132	0.000508015
BLAST_KDGK_THET8 2-dehydro-3-deoxygluconokinase OS=Thermus thermophilus (strain HB8 / ATCC 27634 / DSM 579) GN=kdgK PE=1 SV=1_Q53W83	0	0.000172612	0.000251351	0	0	0.000319227	0.000248297	0.000339624	0.000526445	0.000109872	0	9.72e-05	0.000276192	0.000322227	0	0.000956415	0.0010861	0.000863345	0.00135044	0	0	0.000522037	0	0.000810537	0	0.00108551	0.000193874	0	0	0	0	0.00011956	0	0.000522084	0.000189179	0	0.000403551	0.00015797	0.000243516	0	0.000643658	0	0.000661427	0	0.000280159	0.000770139	0.000305045	0.000309199	0.000112892
Metagenome unknown	0.000523013	0.000460299	0.00056554	0.000465387	0.00162014	0.000684057	0.00145431	0.000242589	0.000140385	0.000109872	0	0.000145751	0.000368256	0.000580009	0	0.000273261	0.000592417	0.00024667	0.00118163	0.000396511	0	0	0	0	0	4.93e-05	0.000258498	3.81e-05	0	0	5.36e-05	0.00035868	0	0	0.000252239	0	0	0.000368596	0.000365275	0.00204689	0.000337154	0	0.00015563	0	0	0.000256713	0.000976145	0.00113373	0
BLAST_RS19_HALOH 30S ribosomal protein S19 OS=Halothermothrix orenii (strain H 168 / OCM 544 / DSM 9562) GN=rpsS PE=3 SV=1_B8D0C8	0.000570559	0.000978136	0.000251351	0	0.000462899	0.000866472	0.00099319	0.000824802	0.000596638	0.000714168	0.000475511	0.00111743	0	0.00128891	0.000185943	0.000273261	0.000394945	0	0	0	0.00016794	3.73e-05	0	8.11e-05	0.000231098	0.000197365	6.46e-05	0.00022838	8.7e-05	0	0.000321423	0	0	0.000278445	0	0.000105346	0	0	0	0.00102344	0.000183902	0	0.00015563	0.000381752	0.000168095	5.13e-05	0	0.000412265	0
BLAST_DHE2_CLODI NAD-specific glutamate dehydrogenase OS=Clostridioides difficile GN=gluD PE=3 SV=1_P27346	0.00114112	0	0	0	9.26e-05	0	0.000212826	0.002717	0	0.000109872	0	0	0.000368256	0.0007089	0.000929714	0.00109304	0	0	0.000168805	0	0	0	0	0	0	0	0	0	0	0	0.00192854	0	0.00119035	0	0	0	0	0	0.000121758	0	0	0	0	0.000763504	0	0	0	0.00066993	0
MDH_CITK8 Malate dehydrogenase OS=Citrobacter koseri (strain ATCC BAA-895 / CDC 4225-83 / SGSC4696) GN=mdh PE=3 SV=1	0	0	0.000125676	0	0	0	3.55e-05	0.00150405	0	5.49e-05	0	0	0	0	0	0	0	0	0	0	0.00016794	0.00126781	0	0	0.000962909	0	0	0	0	0	0	0	0	0	0	0.000895444	0.00242131	0	0	0	0	0.00141143	0	0	0.000560318	0	0	0.000103066	0
BLAST_TPM3_MOUSE Tropomyosin alpha-3 chain OS=Mus musculus GN=Tpm3 PE=1 SV=3_P21107	0	0.000690449	0	0	0	9.12e-05	0.000248297	0	0.0019303	0	0	0.000291503	0	0.000193336	0	0	0.000592417	0.000123335	0	0.000198255	0	0	0	4.05e-05	0	0.000197365	0	0.00079933	0	0.000123294	0.00117855	0	0	3.48e-05	0	0	0.00174872	0	0	0	0.000582358	0.000252042	0.000194537	0.000190876	0	0	0	0.000772997	0
BLAST_PHK_CLOAB Probable phosphoketolase OS=Clostridium acetobutylicum (strain ATCC 824 / DSM 792 / JCM 1419 / LMG 5710 / VKM B-1787) GN=CA_C1343 PE=3 SV=1_Q97JE3	0.00290034	0.00264672	0.000314189	0.000116347	0.00101838	0.0011857	0.000106413	0.000824802	0	0.00164808	0	0	0	0.000451118	0	0	0.000987362	0	0	0.00013217	0	0	0	0	0	0.000197365	0	3.81e-05	0	0	0	5.98e-05	0	0	0.00145037	0	0.000134517	0.000105313	0	0.000383791	0.000122602	0	0	0.000381752	0.000112064	0.000154028	0	0.000103066	0
Metagenome unknown	0	0	0	0	0	0	0	0	0	0	0	0	0	0	0	0	0	0	0	0	0.000209925	0.00376613	0	0	0.000154065	0	0	0	0	0	0	0	0	0	0	0.00400316	0.00403551	0	0	0	0	0.00231878	0	0	0.0026335	0	0	0.000360732	5.64e-05
BLAST_HV335_HUMAN Immunoglobulin heavy variable 3-30-5 OS=Homo sapiens GN=IGHV3-30-5 PE=3 SV=1_P0DP03	0.000190186	0	0	0	0	0	0.000177355	0	0.000210578	0	0	0	0	0	0.000557828	0.000546523	0	0	0	0	0.00033588	0	0.000742772	0.000445795	0.000577745	0	0	7.61e-05	0.000260904	8.22e-05	0.000428564	0.00011956	0.000504996	6.96e-05	0	0.000632078	0	0.000421252	0	0.000351809	0	0	0	0.00133613	0.000168095	0	0	0.000360732	0.000790246
BLAST_YITJ_BACSU Bifunctional homocysteine S-methyltransferase/5,10-methylenetetrahydrofolate reductase OS=Bacillus subtilis (strain 168) GN=yitJ PE=2 SV=1_O06745	0.000190186	0.000287687	0.000188513	0.00034904	0.000277739	0.000136811	0.000283768	9.7e-05	0.00038606	0.00027468	0.000118878	0.000583005	9.21e-05	0	0	0	0	0.000370005	0	0	0	0	0.000685636	0	0	0.00103617	0.000387747	0.000190317	0	0.000616472	0	0.00041846	0	0.00055689	0.00100895	0	0	0.000421252	0.000791428	0.000703617	0.000643658	0.000100817	0.000194537	0	0.000336191	0.000102685	0.00115917	0	0
BLAST_BMPB_BORBP Basic membrane protein B OS=Borreliella bavariensis (strain ATCC BAA-2496 / DSM 23469 / PBi) GN=bmpB PE=3 SV=2_O31362	0	0.000402762	0.000691215	0.000116347	0.000185159	0.000456038	0.000283768	0.000388142	0.00038606	0.000219744	0.000118878	0.000340086	0.000552384	0.000322227	0.000185943	0.000546523	0.000789889	0.000863345	0.000506415	0.000396511	0	0	0	0.000202634	0	0.000296048	0.000258498	0	0	0	0	0.00041846	0	0.000174028	0.000567537	0	0	0.000368596	0.000487033	0	0.000214553	0	0	0	0.000280159	0.00020537	0.000305045	0.000876063	0.000225785
BLAST_ANCA_CLOTH Cellulosome-anchoring protein OS=Clostridium thermocellum (strain ATCC 27405 / DSM 1237 / NBRC 103400 / NCIMB 10682 / NRRL B-4536 / VPI 7372) GN=ancA PE=1 SV=1_Q06848	0	0.00023015	0.000377027	0	0.000324029	0.000684057	0	0.00295958	0	0.000604296	0.000475511	0	0	0	0	0	0.000394945	0.00074001	0	0.000594766	0	0	0	0.000891591	0	0	0	0	0	0.00065757	0	0	0	0	0	5.27e-05	0.000134517	0.000368596	0.000791428	0	0.000245203	0	0.00031126	0	0	0.00215639	0.00183027	0	0
THII_CALS4 Probable tRNA sulfurtransferase OS=Caldanaerobacter subterraneus subsp. tengcongensis (strain DSM 15242 / JCM 11007 / NBRC 100824 / MB4) GN=thiI PE=3 SV=1	0.000237733	0.000345224	0.000377027	0.000814427	0.000231449	0.000182415	0.000212826	0.000194071	0.000175482	0	0.000356633	0.000194335	0	0.000322227	0.000371885	0.000546523	0.000394945	0.00049334	0.00101283	0	4.2e-05	0	0.000285682	0.000283688	0.000231098	0.000246706	0.000258498	0.00022838	0.000173936	0.000164393	0.000214282	0.00035868	0.000252498	0.000174028	6.31e-05	0	0.000538068	0.000210626	0.000304395	0.000159913	0.000183902	5.04e-05	0.000272352	0.00133613	0.000224127	0.000154028	0.000183027	0.000309199	0.000282231
THIL_NITMS Thiamine-monophosphate kinase OS=Nitrosopumilus maritimus (strain SCM1) GN=thiL PE=3 SV=1	0.000237733	0.000172612	0.000125676	0.00034904	0.000324029	0.000136811	0.000141884	0.000242589	0.000105289	0.000219744	0.000475511	4.86e-05	0.000552384	6.44e-05	0.000371885	0	9.87e-05	0	0	0.00013217	0.000503821	3.73e-05	0.000399954	0.000283688	0.000231098	4.93e-05	0.000323123	0.000418697	0.00021742	0	0.000107141	0.00053802	0.000216427	0.000139222	0.000630597	0.000316039	0.000134517	0.000315939	0.000608791	0.000255861	0.000153252	0.000201633	7.78e-05	0.000381752	0.000112064	0.000154028	0.000244036	0.000103066	0.000169338
BLAST_ADHE_ECOLI Aldehyde-alcohol dehydrogenase OS=Escherichia coli (strain K12) GN=adhE PE=1 SV=2_P0A9Q7	0	0.00397008	0	0	0	0.000638453	0	0.00402698	0	0	0	0.00121459	0	0	0	0	0.00167851	0.00074001	0	0	0	0	0	0	0	0	0	0	0	0.000205491	0	0	0	0.00337614	0	0	0	0	0	0	0	0	0.00015563	0	0	0	0	0	0
Metagenome unknown	0.000237733	0.000345224	0.000377027	0.000814427	0.000231449	0.000182415	0.000212826	0.000194071	0.000175482	0	0.000356633	0.000194335	0	0.000322227	0.000371885	0.000546523	0.000394945	0.00049334	0.00101283	0	4.2e-05	0	0.000285682	0.000283688	0.000231098	0.000246706	0.000258498	0.00022838	0.000173936	0.000164393	0.000214282	0.00035868	0.000252498	0.000174028	6.31e-05	0	0.000538068	0.000210626	0.000304395	0.000159913	0.000183902	5.04e-05	0.000272352	0.00133613	0.000224127	0.000154028	0.000183027	0.000309199	0.000282231
CH60_GARVA 60 kDa chaperonin OS=Gardnerella vaginalis GN=groL PE=3 SV=2	0	0.00132336	0.000377027	0.00034904	0.000509189	0.00104889	0.00340522	0.000291107	0.00122837	0.000219744	0	0	0.00193335	0.00161114	0	0	0.000197472	0.00024667	0	0.000330426	0	0.000111865	0.000228545	0	0.000192582	0.000444072	0.000129249	0	0	4.11e-05	0.000160711	0.00053802	0.0016232	0	0.000189179	0	0	0.00015797	0	0	0	0.000151225	0	0	0	0	0.000366055	0	0
BLAST_KPYK_LACLA Pyruvate kinase OS=Lactococcus lactis subsp. lactis (strain IL1403) GN=pyk PE=3 SV=2_Q07637	0	0	0.000251351	0	0	0	0.00099319	0	0	0.000329616	0	0.000340086	0	0	0	0	0	0	0	0	0.00214124	0	0	0	0.000385164	0	0.000452372	0.000837393	0	0	0.000107141	0	0	0	0.000126119	0	0.000134517	0	0	3.2e-05	0	0	0	0.000190876	0.000168095	0	0	0	0.000112892
BLAST_MUC13_HUMAN Mucin-13 OS=Homo sapiens GN=MUC13 PE=1 SV=3_Q9H3R2	0.00118866	0.00023015	0	0.000581734	0	0.000228019	0	0	0.000350963	0	0	0	9.21e-05	0	0.000371885	0.000819784	9.87e-05	0	0.000168805	0	0.000755731	0	0.000457091	0.000688956	0.000693294	0	0.000129249	0.000152253	0.000739227	0	0.000589275	0.00017934	7.21e-05	0	0.000567537	0.000158019	0	0.000684535	0	0.000351809	0.000122602	0	0	0.000381752	0.000168095	0	0	0	0.000225785
BLAST_EUTE_SALTY Ethanolamine utilization protein EutE OS=Salmonella typhimurium (strain LT2 / SGSC1412 / ATCC 700720) GN=eutE PE=4 SV=2_P41793	0.000950932	0.000460299	0.000188513	0.00104712	0.000648058	0.000136811	0.000248297	0.000242589	0.000175482	0.000109872	0	0.000242919	0.000828577	0.0007089	0	0.000136631	0.000691153	0.000370005	0.000168805	0	0	7.46e-05	0.000514227	4.05e-05	0.000115549	0.000690778	6.46e-05	0.000418697	8.7e-05	0.000904159	0	5.98e-05	0.000577138	0.000139222	0	0.000105346	0.000403551	0.00015797	0.000365275	0.000191896	0.000306504	0.000100817	0	0.000954381	5.6e-05	0.000308056	0.000366055	0.000154599	0.000112892
LEG4_MOUSE Galectin-4 OS=Mus musculus GN=Lgals4 PE=1 SV=2	0	0	0	0	0	0	0	0.000194071	0	0	0	0	0	0	0.000185943	0	0	0	0	0	0.00033588	0.000298307	0.000742772	0.00202634	0.000500713	4.93e-05	0	7.61e-05	0	0	0	0.00035868	0	0.000174028	0.000630597	0.000316039	0	0.000684535	0	0	0	0.000453675	7.78e-05	0.000190876	0	5.13e-05	0.000366055	0.000876063	0
Metagenome unknown	0	0	0	0	0	0	0	0	0	0	0	0	0	0	0	0	0	0	0	0.000594766	0.00306491	0	0	0	0	0	0.000904743	0.00411084	0	0	0	0	0	0	0	0	0	0	0	0	0	0	0	0	0	0	0	0	0
BLAST_CH60_STRS7 60 kDa chaperonin OS=Streptococcus equi subsp. zooepidemicus (strain H70) GN=groL PE=3 SV=1_C0MES3	0	0.000115075	0.000125676	0	0	0	0.00290863	0	0.000210578	0	0	0.00126318	0	0	0.000185943	0	0	0.000123335	0	0.000198255	0.0036527	0	0	0	0.00042368	0.000690778	0	3.81e-05	0	0	0.00176783	0	0	0.000104417	6.31e-05	0	0	0	6.09e-05	0	6.13e-05	0.000100817	0	0	0	0	0.000244036	0	0
BLAST_ZA2G_HUMAN Zinc-alpha-2-glycoprotein OS=Homo sapiens GN=AZGP1 PE=1 SV=2_P25311	0	5.75e-05	0.000502702	0	0	0.000410434	0.000177355	0.000291107	0.000140385	0.000329616	0	0	0	0	0.000185943	0	0	0	0	6.61e-05	0.00016794	0.000149154	0	8.11e-05	0.00103994	0.000246706	0.00142174	0.000152253	0	0	0.000964268	0	0.000252498	0	6.31e-05	0.000105346	0	0.000105313	0	0.000319826	0.000521057	0	0.000233445	0	0	0.000154028	0	0.000154599	0.000451569
BLAST_LCFH_HAEIN Putative long-chain-fatty-acid--CoA ligase OS=Haemophilus influenzae (strain ATCC 51907 / DSM 11121 / KW20 / Rd) GN=HI_0002 PE=3 SV=1_P44446	0	0.00023015	0	0	0	0	0.000141884	0	0.000140385	0	0.000118878	0.000291503	0	0.000257782	0	0	0.000296209	0	0	0.000660851	0	0	0.000171409	0.00064843	0	0.00039473	0.000323123	0.000532887	0	8.22e-05	0.000374993	0.00053802	0.000180356	0.000104417	0	0	0	0.000737191	0.000243516	0	0.000367805	0.000201633	0.00015563	0	0.000392223	0.000718797	0.000122018	0.00108219	0.000338677
FRIL_HUMAN Ferritin light chain OS=Homo sapiens GN=FTL PE=1 SV=2	0	0	0	0.00069808	0	0.000182415	0	0.000485178	0.000210578	0.000439488	0	0.000242919	0	0	0	0.000409892	9.87e-05	0.000123335	0	0.000330426	0.00138551	3.73e-05	0.000114273	0	0	0	0.000516996	0.00045676	0.000347871	0	0.000107141	0	0.000288569	6.96e-05	0	0	0	0.000210626	0.000913186	0.000351809	0.000214553	0.000352858	0.00015563	0.000381752	0	0	0.000244036	0.000309199	0
MUC5A_HUMAN Mucin-5AC OS=Homo sapiens GN=MUC5AC PE=1 SV=4	0.000380373	0.000345224	0.000125676	0	9.26e-05	0.000273623	0.000212826	9.7e-05	0.000210578	0.000604296	0	0.000291503	0	0.000386673	0.000185943	0.000136631	0.000197472	0.00049334	0.00033761	0	0.00025191	0	0	0.000324215	0.000577745	0.000296048	0	0.000152253	0.000347871	0.000246589	0.000535705	0.0002989	0	6.96e-05	0	0	0.000403551	0.00015797	0.000243516	0	0.000122602	0.00030245	0.000116722	0.00133613	0.000112064	0.000102685	0.000122018	0.000566864	0
BLAST_RL4_BACV8 50S ribosomal protein L4 OS=Bacteroides vulgatus (strain ATCC 8482 / DSM 1447 / JCM 5826 / NBRC 14291 / NCTC 11154) GN=rplD PE=3 SV=1_A6KYJ4	0	0	0	0.00034904	0.00013887	0.000547246	0.000709421	0	0	0	0	0	0	0.0007089	0.000371885	0	0	0.00160336	0.00033761	6.61e-05	0	0.000857633	0.000514227	0.000243161	0.000654778	0	0.000452372	0.000152253	0.000913163	0	0	0.00041846	0.000396782	0.000139222	0.000441418	0.000948117	0.000269034	0.000105313	0	0.00134327	0.00144057	0	0.0010505	0	0.000336191	0.000872824	0.000488073	0	0
BLAST_TPIS_BACCN Triosephosphate isomerase OS=Bacillus cytotoxicus (strain DSM 22905 / CIP 110041 / 391-98 / NVH 391-98) GN=tpiA PE=3 SV=1_A7GUR9	0.00028528	0.000287687	0.000377027	0.00034904	0.000277739	0.000319227	0.000354711	0.000388142	0.000350963	0.000329616	0.000118878	0.000340086	0.000552384	0.000322227	0.000929714	0	0.000197472	0.00024667	0.00033761	0.000330426	0	0	0.000457091	0	0.000308131	0.000444072	0.000387747	0.00022838	0.000130452	0.00045208	5.36e-05	0.00035868	0.000288569	0.000278445	0.000378358	0	0.000403551	0.000368596	0.000487033	0.000255861	0.000245203	0.000100817	7.78e-05	0.000190876	0.000336191	0.000410741	0.000305045	0	0
BLAST_PGK_BACTN Phosphoglycerate kinase OS=Bacteroides thetaiotaomicron (strain ATCC 29148 / DSM 2079 / NCTC 10582 / E50 / VPI-5482) GN=pgk PE=3 SV=1_Q8A753	0	0.000287687	0.000377027	0	0	9.12e-05	3.55e-05	0.000194071	0.00101779	0	0	0.000437254	0	0	0.000371885	0.00232272	0.000493681	0	0.000168805	0.000462596	0	0.000149154	0.00114273	0	0.000808843	0.000444072	0.000258498	7.61e-05	0	0	0	0	0.000504996	0.00135742	0.000126119	0.000421385	0	0	0.000121758	0	6.13e-05	0.000252042	0	0	0	0	0.0006711	0.000309199	0.000677354
BLAST_FLIC_SERMA Flagellin OS=Serratia marcescens GN=fliC PE=3 SV=1_P13713	0	0.000517837	0.000628378	0	0.000277739	0.000820868	0	0.00043666	0.000947601	0.000109872	0	0.000583005	0	0	0.000557828	0	0	0	0.000168805	0.00013217	0	0.00100679	0	4.05e-05	7.7e-05	0.00113485	0.000516996	0.000266443	0	8.22e-05	0.000749987	5.98e-05	0.000180356	0.000626501	0.000126119	0	0	0.00015797	0.000182637	0	0.000980813	0.000806533	0	0	5.6e-05	0.000616111	0.000793118	0.000154599	5.64e-05
BLAST_AVEN_AVESA Avenin OS=Avena sativa PE=1 SV=1_P27919	0	0.000115075	0.000251351	0	0	0.000501642	7.09e-05	0.000194071	0.000245674	0.00131846	0	0.000145751	0.0012889	0.000128891	0.00167348	0	0.000296209	0.000123335	0	0	0	0	0	0	0	0.000690778	0	0	0	0	0.000160711	0	7.21e-05	3.48e-05	0	0	0.000269034	0	0	0	6.13e-05	0	0	0	0	0.000308056	0	5.15e-05	0
BLAST_GUNF_CLOCE Endoglucanase F OS=Clostridium cellulolyticum (strain ATCC 35319 / DSM 5812 / JCM 6584 / H10) GN=celCCF PE=1 SV=2_P37698	0	0.00115075	0.000125676	0	0.0013887	9.12e-05	0.000177355	0.0013585	0.00108799	0	0	0	9.21e-05	0	0	0	0.00157978	0	0	0.000462596	0	0.00100679	0	0.000162107	0	0	0	0	0	0	0	0	0	0	0	0	0	0	0	0	0.000551707	0.00146184	0.000933779	0	0	0	0.000488073	0	0
BLAST_EFG_THETH Elongation factor G OS=Thermus thermophilus GN=fusA PE=1 SV=1_P13551	4.75e-05	0.000345224	0.000188513	0	0	0.00036483	0	9.7e-05	0.000105289	0	0	0.000437254	0	0	0.000371885	0.000136631	9.87e-05	0.00160336	0	0	0	0.00305765	0.000399954	0.000202634	0.000192582	4.93e-05	0	0	4.35e-05	0.000164393	0	0	0.000108213	0.001253	0	0	0.000269034	0	0	0	0.00226813	0	0.00182865	0	0	0.000770139	0.000732109	5.15e-05	0.000169338
BLAST_RS15_LACP7 30S ribosomal protein S15 OS=Lachnoclostridium phytofermentans (strain ATCC 700394 / DSM 18823 / ISDg) GN=rpsO PE=3 SV=1_A9KNL0	0.000475466	0.000460299	0	0.000814427	0.000277739	0.000273623	0.000283768	0.000291107	0.000280771	0.000329616	0.000356633	0.000340086	0	0.000515564	0.0013016	0.000956415	0.000789889	0.00074001	0.00101283	0.00013217	0	0	0.000457091	0	0.000231098	0.000296048	0	0	0	0.000123294	0	0.00047824	0.000144285	0.000208834	0.000504477	0	0	0.000421252	0.000243516	0.000255861	0	0.00030245	0	0	0.000224127	0	0.000244036	0.000103066	0.000112892
BLAST_PRDB_ACESD D-proline reductase subunit gamma OS=Acetoanaerobium sticklandii (strain ATCC 12662 / DSM 519 / JCM 1433 / NCIMB 10654) GN=prdB PE=1 SV=3_Q9Z4Q7	0.00014264	0.00023015	0	0.000465387	0.000509189	0.000456038	0.000532066	9.7e-05	0.000105289	0	0	0	0.000736513	0.000128891	0	0	0	0	0	0.000198255	0	7.46e-05	5.71e-05	8.11e-05	0.000616262	4.93e-05	0.000129249	0.000304507	0.000173936	0.000369883	0	0.00035868	0.000432854	0	0	0	0	0.000684535	0.000974066	0	0.000521057	0.000453675	0.000583612	0	5.6e-05	0.000256713	0.000488073	0.000876063	0.000338677
CAH1_HUMAN Carbonic anhydrase 1 OS=Homo sapiens GN=CA1 PE=1 SV=2	9.51e-05	5.75e-05	0.000502702	0	0.000185159	0.0011401	0.000461124	0.000630731	0.000245674	0	0	0	0	0.000128891	0	0	0	0	0	0.000660851	0.0011336	0.000857633	0	0.00243161	0.00304279	0	0	0	0	8.22e-05	0	0	0	0	0.000189179	0.000526732	0	0	0	0.000287843	0.000153252	0	0	0	0	0	0	0.000103066	0
BLAST_AMY_BACSU Alpha-amylase OS=Bacillus subtilis (strain 168) GN=amyE PE=1 SV=2_P00691	0	0.000575374	0	0.000232693	0.00120354	0.000228019	0	0	0.000280771	5.49e-05	0	0	0.00046032	0.00206225	0	0	0	0	0.00033761	0	0	0.000298307	0	0.000162107	0	0	0.000775494	0	0	0.000164393	0	0	0	0.00100936	0	0	0	0	0	0	0	0.000806533	0.000116722	0	0.00168096	0	0.000366055	0	0.000338677
Metagenome unknown	0	0	0	0	0	0	0	0	0	0	0	0	0	6.44e-05	0.000929714	0.0053286	0.000394945	0	0	0	0	0	0.000228545	0	0	0	0	7.61e-05	0	0.000164393	5.36e-05	0	0	0.000800529	0	0.00121148	0	0	0.000243516	0.00249464	0	0	0	0	0	0	0	0	0
BLAST_SUSD_BACTN Starch-binding protein SusD OS=Bacteroides thetaiotaomicron (strain ATCC 29148 / DSM 2079 / NCTC 10582 / E50 / VPI-5482) GN=susD PE=1 SV=1_Q8A1G2	0	0	0.000188513	0	0.00467528	9.12e-05	3.55e-05	0	0.000105289	5.49e-05	0	9.72e-05	0	0	0	0	0	0	0	0.000198255	0.000125955	0	0	0	7.7e-05	0	0.000193874	0.00011419	0	0	0.000107141	0	0	0	0.00384664	0	0.000269034	0	0.000121758	0	0.000643658	0	0.000855965	0	0	0.00138625	0.000122018	0	0.000169338
BLAST_ALF_TREPA Fructose-bisphosphate aldolase OS=Treponema pallidum (strain Nichols) GN=fba PE=3 SV=1_O83668	0	0.000460299	0.00157094	0	0	0.000410434	0.000390182	9.7e-05	0.000912505	0.000329616	0	0.00140893	0	0.0007089	0	0.000273261	9.87e-05	0	0.000675219	0.000528681	0	0	0.000114273	0.000162107	7.7e-05	0.00133222	6.46e-05	0	8.7e-05	0.000287687	0	0	0.000108213	0.000730918	0	0	0	0	0.000304395	9.59e-05	0.000337154	0.000756125	0	0	0	0	0.000122018	0.000515331	0.000451569
K2C8_HUMAN Keratin, type II cytoskeletal 8 OS=Homo sapiens GN=KRT8 PE=1 SV=7	0.00228224	0.000402762	0.000628378	0.00034904	0.000555478	9.12e-05	0.000141884	0.000291107	0.000175482	0.000219744	0	9.72e-05	0	0.000128891	0.000185943	0.000136631	9.87e-05	0.000370005	0.000168805	0	0.000293895	0	0.00102845	0.00421479	0.000385164	0	0	0	0	0	0.000214282	0	3.61e-05	3.48e-05	0.000189179	5.27e-05	0	0.000105313	0	6.4e-05	0	0.000554491	0.00015563	0	0	5.13e-05	0	0.000721464	0.000282231
BLAST_TKT_MYCLE Transketolase OS=Mycobacterium leprae (strain TN) GN=tkt PE=3 SV=1_P46708	0	0.00120828	0.000188513	0.00034904	0.000833218	0.00100328	0.00333428	0.000339624	0.000561541	0.000219744	0	0	0.00119683	0.00193336	0	0	0	0.00024667	0	0	0	0	0.000857045	0	0.000269614	0	0.000193874	7.61e-05	0	0	0.000160711	0.00083692	0.000757494	0	0.00132425	0	0	0.000684535	6.09e-05	0	0	0	0	0	0	0	0.000122018	0	0
OTC_LACRD Ornithine carbamoyltransferase OS=Lactobacillus reuteri (strain DSM 20016) GN=arcB PE=3 SV=1	4.75e-05	0	0	0.000116347	0	0	0	0	7.02e-05	0	0.000237756	4.86e-05	0	0	0	0.000273261	0	0	0	0.000198255	4.2e-05	0.000261019	0	0.000121581	0	9.87e-05	0.000258498	0.00555725	0	8.22e-05	0	0	0.000829636	3.48e-05	0.000189179	0	0.000403551	0	0	0	6.13e-05	5.04e-05	0.000233445	0.000190876	0	0.000102685	0	0.000154599	0.000677354
BLAST_GRDG_PEPAC Sarcosine reductase complex component B subunit alpha OS=Peptoclostridium acidaminophilum GN=grdG PE=3 SV=1_O86185	4.75e-05	0	0	0.000581734	0	0.000273623	0.000957719	0	0.000982698	0.000109872	0	0.000777341	0.000184128	0	0	0	9.87e-05	0.000123335	0	0.00013217	0	0	0	4.05e-05	0	0.000444072	0	3.81e-05	4.35e-05	0.000369883	0	0.00035868	0.000144285	0.000452473	6.31e-05	0	0	0.000210626	0.00170462	0	0.000613008	0.00090735	7.78e-05	0	0.000560318	0.00020537	0.000793118	0.000309199	0.000508015
BLAST_RS2_PORGI 30S ribosomal protein S2 OS=Porphyromonas gingivalis (strain ATCC BAA-308 / W83) GN=rpsB PE=3 SV=1_Q7MX41	4.75e-05	5.75e-05	0	0.00069808	9.26e-05	4.56e-05	0	0.000145553	7.02e-05	0.000109872	0.000118878	0.000194335	0	0.000193336	0.000185943	0.000683153	0	0.000370005	0	0.00026434	0.00025191	7.46e-05	0.000342818	0.000121581	0.000192582	9.87e-05	0.00071087	0.000152253	0.00021742	0.000287687	0.000214282	0.00017934	0.000180356	6.96e-05	0.000126119	0.000210693	0.000403551	5.27e-05	0.000426154	0.000383791	0.000214553	0.000201633	0.000233445	0.000572628	0.00061635	0.000256713	6.1e-05	0	0.000282231
BLAST_MTDH_MEDSA Probable mannitol dehydrogenase OS=Medicago sativa GN=CAD1 PE=1 SV=1_O82515	0.00185432	0.000287687	0	0.00034904	0.000462899	0	0.000638479	0.000145553	0	0.000439488	0	0.000534422	0.000368256	0.000257782	0	0.000136631	0.000197472	0.00024667	0	0.00026434	0	7.46e-05	0.0006285	0	0	0.000789461	6.46e-05	0	0	0.00115075	0	0.00017934	0.000144285	0.00031325	0.000126119	0	0	0.000105313	0.000304395	0.000319826	0.000214553	0.0006049	0.00015563	0.000763504	0.000448255	0.000154028	0.000366055	0.000103066	0.000112892
BLAST_PNP_BACTN Polyribonucleotide nucleotidyltransferase OS=Bacteroides thetaiotaomicron (strain ATCC 29148 / DSM 2079 / NCTC 10582 / E50 / VPI-5482) GN=pnp PE=3 SV=1_Q8A4N6	0	5.75e-05	0	0	9.26e-05	0.00109449	0.00177355	4.85e-05	0.000105289	0	0	4.86e-05	0	0	0.000185943	0	0	0.00148002	0.00033761	0	0.000125955	0.00134238	0	0.000364742	3.85e-05	9.87e-05	0	0.00011419	0	0	0	5.98e-05	0	0.000487279	0.000126119	0.000210693	0.000807103	0	0	3.2e-05	0.00180837	0	0.00233445	0	5.6e-05	0.00164296	0	0	0
Metagenome unknown	0.000713199	0.000978136	6.28e-05	0	0.000786928	0	0	0	0	0	0	0.000145751	0.000552384	0	0.00204537	0.00163957	0.000197472	0	0	6.61e-05	0	0	0.00165695	0	0	0	0.000323123	0	0.00100013	0	0	0.0005978	0.00064928	0.000452473	0.000693656	0	0	0.000105313	0.000182637	0.00137525	0	0	0	0	0	0	0	0	0.000508015
BLAST_FUCA_METMP L-fuculose phosphate aldolase OS=Methanococcus maripaludis (strain S2 / LL) GN=fucA PE=3 SV=1_Q6LY06	0.00128376	0.000402762	0.000125676	0.000116347	0.000370319	0.000729661	0.000567537	0.000388142	0.000280771	0.000933912	0	0.000534422	0	0.000773345	0.000185943	0.000546523	0.000592417	0.00074001	0	6.61e-05	0	0.000111865	0	0	0.000231098	0.000888143	0	0.00011419	8.7e-05	0.000205491	0	0.00023912	0.000108213	0.000174028	0	0	0.000134517	0	0.000426154	0.000575687	0.000183902	0.00030245	7.78e-05	0.000572628	0.000168095	0.000154028	0.000122018	0	0
BLAST_INO1_MAIZE Inositol-3-phosphate synthase OS=Zea mays PE=2 SV=2_Q9FPK7	0	0	0.000125676	0	9.26e-05	0.000182415	0.000212826	0	0	0.000109872	0	0	0	0.000128891	0.000185943	0	0	0.000123335	0	0.000198255	0	0.000484749	0.000399954	0.000688956	3.85e-05	0.000246706	0	0.000304507	0	0.000328785	0	0.00047824	0	0.000417667	0.000630597	0.000210693	0.000269034	0.000368596	0.000974066	0.000351809	0.000613008	0.000201633	0.00112832	0	0.000112064	0.000821482	0.000610091	0.000309199	0.000395123
SODC_PANTR Superoxide dismutase [Cu-Zn] OS=Pan troglodytes GN=SOD1 PE=2 SV=2	0.000332826	0	0.000816891	0.00069808	0.000185159	0	0	0	0	0	0	0	0.00046032	0	0	0	0	0	0.000168805	0	0.000377865	0.000820345	0	0.000324215	0	0.00039473	0.000193874	0.000304507	0.000739227	0	0.000482134	0.00035868	0.000468925	6.96e-05	0	0	0	0	0.0011567	0.000639652	0	0.000957758	0	0	0	0	0	0.000927596	0
Metagenome unknown	0.00114112	0.000287687	0	0.000581734	0.000185159	0.000228019	0.000177355	0.000194071	0.000175482	0.00054936	0	0.000583005	9.21e-05	0.000386673	0.000557828	0.000819784	0.00118483	0.000616675	0.00101283	0.000330426	8.4e-05	0.000186442	5.71e-05	0.000202634	3.85e-05	0.000888143	0.000323123	0	4.35e-05	8.22e-05	0	0.00023912	0	6.96e-05	6.31e-05	0.000316039	0	0.000105313	0	6.4e-05	0.000398455	0	3.89e-05	0.00114526	0.000112064	0.00020537	6.1e-05	0.000154599	0
BLAST_PHSG_THELN Maltodextrin phosphorylase OS=Thermococcus litoralis (strain ATCC 51850 / DSM 5473 / JCM 8560 / NS-C) GN=malP PE=1 SV=1_Q9YGA7	0	0	0	0	0	0.000228019	0.000106413	0	0	0	0.000118878	0	0	0	0.000371885	0.000136631	9.87e-05	0.000863345	0.00033761	0	0	0.00190171	0.000342818	0.000364742	0.000462196	0	0.000129249	0	0	0	0	0	0.000144285	0.000452473	0.00163955	0.000158019	0.000134517	0.00015797	0	0.00012793	0.00171642	0.000100817	0.0026068	0	0.000280159	0.000770139	0.000366055	0.000257666	0
Metagenome unknown	0	0	0	0	0	0	0	0	0	0	0	0	0	0	0	0	0	0	0	0	0	0	0	0.00174266	0	0.000345389	0.000258498	0	0	0	0	0	0	0	0	0	0	0.000947817	0	0	0	0	0	0	0.000168095	0	0.000183027	0	0
BLAST_RL14_EUBE2 50S ribosomal protein L14 OS=Eubacterium eligens (strain ATCC 27750 / VPI C15-48) GN=rplN PE=3 SV=1_C4Z2U0	0.00161658	0.000402762	0	0.000465387	0.000231449	0.000273623	0.000461124	0.000388142	0.000491349	5.49e-05	0	0.00038867	0.000184128	0.00103113	0	0.00232272	0.000197472	0.000123335	0	0	0	3.73e-05	0.000171409	0	7.7e-05	0.000345389	0	0	8.7e-05	0.000287687	0.000107141	0.00011956	7.21e-05	3.48e-05	0	0.000684751	0	0.000210626	0	0.000959478	0.000122602	0.000352858	0	0.000954381	0.000392223	5.13e-05	0.000976145	0.000154599	0
Metagenome unknown	0.000570559	0.00023015	0.000125676	0.000465387	0.000601768	0.000136811	0.000177355	4.85e-05	7.02e-05	0.000164808	0.000356633	4.86e-05	0.000276192	0.000257782	0.000557828	0.000136631	0.000197472	0.000370005	0.00033761	6.61e-05	0.00100764	7.46e-05	5.71e-05	0.000243161	0.000346647	0.00039473	0.000452372	0.00034257	0.000391355	0.000164393	0	0.0005978	0.00032464	0.000139222	0.000315298	0.000158019	0.000269034	0.00015797	6.09e-05	0.000479739	0	5.04e-05	0.00031126	0.000190876	0.000168095	0.000102685	0.000305045	0	0.000169338
Metagenome unknown	0.00118866	0.000345224	0.000251351	0	0.00152757	0.00036483	0.000603008	0.000242589	0.00038606	0.000164808	0.000475511	0.000242919	0	0.000644454	0.000185943	0.00122968	0.000394945	0.00024667	0.000844024	0.00026434	0.000671761	3.73e-05	0	0.000121581	0.000231098	0.000197365	0.000258498	0.000152253	0.000260904	8.22e-05	0.000374993	0.00023912	3.61e-05	0.000139222	0	0.000210693	0	5.27e-05	0.000365275	0.000191896	0.000122602	0.00030245	0.000194537	0.000190876	0	0.000256713	0.000122018	0.000103066	0.000112892
Metagenome unknown	0.000380373	0	0	0.00104712	0.000231449	0	0.000212826	4.85e-05	0	0.000164808	0.000118878	0	9.21e-05	0	0	0.000136631	0	0	0	6.61e-05	0.000419851	7.46e-05	0.000114273	8.11e-05	0.000269614	0	0.000581621	0.000532887	0.000695743	8.22e-05	0.000482134	0.00041846	0.00032464	0	0.000252239	0.000526732	0	0.000684535	0.000426154	0.000543704	3.07e-05	5.04e-05	0.000194537	0	0.000280159	0.00020537	0.000183027	0	0
BLAST_FAD25_MYCTU Putative fatty-acid--CoA ligase fadD25 OS=Mycobacterium tuberculosis (strain ATCC 25618 / H37Rv) GN=fadD25 PE=1 SV=1_P9WQ45	0.000237733	0.00023015	6.28e-05	0.000581734	0.00013887	0.000182415	7.09e-05	0.000145553	0.000105289	0.000109872	0	0.000145751	0.000276192	0.000128891	0.000185943	0.000273261	0.000394945	0	0.000506415	6.61e-05	0.000125955	7.46e-05	0.000228545	0.000445795	0.000192582	0.000148024	0.000452372	0.00022838	0.000260904	0.000123294	0.000107141	0.00041846	0.000180356	6.96e-05	0.000378358	0.000210693	0	0.000263283	0.000243516	0.00012793	6.13e-05	0.00030245	0.00015563	0	0.000112064	0.00020537	0.000183027	0.000154599	0.000338677
BLAST_TETP_CLOPF Tetracycline resistance protein TetP OS=Clostridium perfringens GN=tetP PE=3 SV=1_Q46306	0	0.000345224	0.000314189	0.000581734	9.26e-05	0.000319227	7.09e-05	0.000339624	0.000105289	0.000329616	0.000237756	0.000291503	0.00046032	0.000322227	0.000557828	0.000136631	0.000888626	0.00024667	0.000168805	0.00013217	0	7.46e-05	0.000171409	0.000121581	3.85e-05	0.000444072	0.000323123	0.000190317	8.7e-05	0.000328785	0	0.00011956	0.000180356	0.000452473	0.000378358	0	0.000269034	0.000263283	0.00066967	9.59e-05	0.000337154	0.000100817	0.000194537	0	0.000280159	0	0.000427064	0.000360732	0.000282231
BLAST_DHPS_HAEIN Dihydropteroate synthase OS=Haemophilus influenzae (strain ATCC 51907 / DSM 11121 / KW20 / Rd) GN=folP-A PE=3 SV=1_P43776	9.51e-05	0.00023015	0	0.00034904	0.000324029	4.56e-05	3.55e-05	9.7e-05	0.000175482	0.000109872	0	0.000145751	0.00046032	0.000322227	0.000185943	0.000273261	0.000197472	0	0.000168805	0.00013217	0.000461836	3.73e-05	0.000457091	0.000162107	0.000385164	9.87e-05	0.000193874	0.000190317	0.000173936	8.22e-05	0.000428564	5.98e-05	0.000468925	3.48e-05	0.000126119	0.000316039	0.000269034	0.000263283	0.000243516	0.000287843	9.2e-05	5.04e-05	0.000116722	0.000763504	0.000784446	0.000154028	6.1e-05	5.15e-05	0.000169338
RS1_ECOLI 30S ribosomal protein S1 OS=Escherichia coli (strain K12) GN=rpsA PE=1 SV=1	0	0	0	0	0	0	0	9.7e-05	0	0	0	0	0	0	0	0	0	0	0	0	8.4e-05	0.00216273	0	0	0.000231098	0	0	0	8.7e-05	0	0	0	0	0	0	0.00205425	0.00363196	0.000105313	0	0	0	0.00151225	0	0	0.0014008	5.13e-05	0	5.15e-05	0
BLAST_METQ_BACSU Methionine-binding lipoprotein MetQ OS=Bacillus subtilis (strain 168) GN=metQ PE=1 SV=1_O32167	0.000237733	0.00023015	0.000188513	0.00034904	0.000231449	0.000273623	0.000177355	9.7e-05	0.000175482	0.000109872	0.000475511	0.000194335	0	0.000128891	0.000185943	0.000546523	0	0.00049334	0.000506415	0.00026434	0.000377865	0.000186442	0.000342818	0.000202634	0.000154065	0.000197365	0.000193874	0.00022838	0.000260904	0.000328785	0.000214282	0.00011956	0.000216427	0	0.000315298	0.000210693	0.000269034	0.000210626	0.000243516	0.000191896	6.13e-05	0.000201633	0.000194537	0.000763504	0.000224127	0.00020537	0.000122018	0.000206132	0.000395123
BLAST_ALKH_TREPA Putative KHG/KDPG aldolase OS=Treponema pallidum (strain Nichols) GN=eda PE=3 SV=1_O83578	9.51e-05	0.000690449	0.00056554	0	0	0.00100328	0.000496595	0.000824802	0.00108799	0.000604296	0	0.000728757	0.0012889	0.000128891	0	0	0.000987362	0.00049334	0.000675219	0	0	0.000186442	0	4.05e-05	0	0.000592096	0	0	0	0	0	0.00041846	0	0.000800529	0.000126119	0	0	0	0.000426154	0	0.000459756	0.000100817	0.000350167	0	0.000112064	0.000102685	0.000549082	0.000154599	0
BLAST_QUEA_BRUSU S-adenosylmethionine:tRNA ribosyltransferase-isomerase OS=Brucella suis biovar 1 (strain 1330) GN=queA PE=3 SV=1_P65949	0.00014264	0.00023015	0.000251351	0.000465387	0.00013887	0.000228019	0.000141884	0.000194071	0.000140385	0.00027468	0.000475511	0.000145751	0.00046032	0.000322227	0.000371885	0.000546523	0.000197472	0.00049334	0.000675219	0.000198255	0.000125955	0.000111865	0.000342818	0.000162107	0.000115549	0.000148024	0.000258498	0.000152253	0.00021742	0.000205491	0.000267852	0.0002989	7.21e-05	0	0.000378358	0.000263366	0.000403551	0.000210626	0.000365275	0.00012793	0.000122602	0.00030245	0.000194537	0.000381752	0.000224127	0.00020537	0.000244036	0.000206132	0.000112892
BLAST_RL10_GRAFK 50S ribosomal protein L10 OS=Gramella forsetii (strain KT0803) GN=rplJ PE=3 SV=1_A0M3Z1	0.00014264	0	0.000188513	0	0	0.000592849	0.000354711	0.000194071	3.51e-05	0	0	0.000145751	0	0.000128891	0	0	0	0.00123335	0	0	0	0.00186442	0.000685636	0.000121581	0.000885876	0.000197365	0	0	0	0.000164393	0	0	0.000144285	0.000765723	0	0.000421385	0.00255582	0	0.000243516	0	0.000858211	0	0.00143958	0	0.000336191	0.000308056	0.000183027	0	5.64e-05
BLAST_SLT2_YEAST Mitogen-activated protein kinase SLT2/MPK1 OS=Saccharomyces cerevisiae (strain ATCC 204508 / S288c) GN=SLT2 PE=1 SV=2_Q00772	0.000332826	5.75e-05	6.28e-05	0	0.000416609	9.12e-05	3.55e-05	9.7e-05	0.000140385	0	0.000118878	4.86e-05	0	0	0	0.000136631	9.87e-05	0.000123335	0	6.61e-05	0.00121757	0	5.71e-05	8.11e-05	0.000308131	9.87e-05	0.000323123	0.000380633	0.000521807	0.000287687	5.36e-05	0.0002989	0.000144285	0.000243639	0	5.27e-05	0	0.000210626	0.000365275	0.000447756	0.000398455	0.000151225	0.000194537	0.000190876	0.000224127	0.000308056	0.000305045	5.15e-05	0.000225785
BLAST_OLHYD_MACCJ Oleate hydratase OS=Macrococcus caseolyticus (strain JCSC5402) GN=MCCL_0076 PE=1 SV=1_B9E972	0	0.000287687	6.28e-05	0	9.26e-05	9.12e-05	0.000106413	4.85e-05	0	0.00027468	0	0.000194335	0	0	0	0	0	0	0.000168805	0.000396511	0.000209925	0	0.000285682	0	3.85e-05	0.000246706	6.46e-05	7.61e-05	4.35e-05	0	0.000107141	0	0	3.48e-05	0.000630597	5.27e-05	0.000269034	5.27e-05	0.000547912	0.000319826	0	0.000100817	0	0.000763504	5.6e-05	5.13e-05	0.000122018	0.00175213	0
BLAST_TKT_BACHD Transketolase OS=Bacillus halodurans (strain ATCC BAA-125 / DSM 18197 / FERM 7344 / JCM 9153 / C-125) GN=tkt PE=3 SV=1_Q9KAD7	0	0	0	0	0	0.00109449	0.000851305	0	0	0	0	0	0	0	0	0	0	0.00234337	0	0	0	0.0025729	0	0.000810537	0	0	0	0	0	0	0	0	0	0	0	0	0.00147969	0	0	0	0.00288114	0	0.00213991	0	0	0.00097551	0	0	0
Metagenome unknown	0	0	0.000251351	0	0	9.12e-05	0.000354711	0	7.02e-05	0.000439488	0	0.000242919	0	0	0	0	0	0	0	0.00013217	0.000797716	0	0	0	0.000154065	0	0.000904743	0.000532887	0	0	0	0	0	0	0	0	0.000672585	0	0.000304395	0	0	0	0	0	0	5.13e-05	6.1e-05	0	0.000225785
BLAST_EFTU_GEOSW Elongation factor Tu OS=Geobacillus sp. (strain WCH70) GN=tuf PE=3 SV=1_C5D3R5	0.00028528	0.000690449	0.000502702	0	0.00013887	0.000136811	0.000141884	0.000242589	0.000140385	0.000219744	0.000118878	0.000340086	0.00046032	6.44e-05	0.000557828	0.000409892	0.000691153	0.000370005	0.000844024	0.00026434	0	0	0.000228545	0	0.000346647	0.000542754	0.000258498	0.000152253	0.000347871	0.000123294	5.36e-05	0	0.000288569	0.000487279	0	0	0.000403551	0	0.000304395	0.000255861	0.000153252	0.000453675	0.000116722	0	0.000448255	0.00020537	0.0006711	0.000360732	0.000564462
BLAST_NPM_HUMAN Nucleophosmin OS=Homo sapiens GN=NPM1 PE=1 SV=2_P06748	0	0	0	0	0	0	0	0	0	0	0	4.86e-05	0	0	0	0	0	0	0	0.00013217	0.000125955	0.000149154	0.000399954	0.000121581	0.000154065	0.000148024	0.000452372	0.000152253	0.000695743	0.000410981	0	0	0.000360711	0	0.000189179	0	0.000269034	0.000315939	0.000852307	0.000255861	6.13e-05	0.000453675	7.78e-05	0	0.000392223	0.000308056	0.000244036	0.000463798	0.000620908
BLAST_NALDL_HUMAN N-acetylated-alpha-linked acidic dipeptidase-like protein OS=Homo sapiens GN=NAALADL1 PE=1 SV=2_Q9UQQ1	0.000190186	0	6.28e-05	0	0.000277739	0.000182415	0.000106413	9.7e-05	0.000175482	5.49e-05	0	0.000194335	0.000276192	0.000257782	0	0.000273261	0	0	0	0	0.000377865	7.46e-05	0.000799909	0.000364742	0.000154065	0	6.46e-05	0.000152253	0	0.000616472	0.00128569	0.00203252	0	0	0	0.000105346	0	0.000263283	0	0	0.000122602	0.00161307	0.00031126	0.000190876	0.000112064	0	0	0.00066993	0.000451569
BLAST_GLGA_GEOTN Glycogen synthase OS=Geobacillus thermodenitrificans (strain NG80-2) GN=glgA PE=3 SV=1_A4IS20	0.000380373	0.00023015	0.000314189	0.000581734	0.000370319	0.000319227	0.000248297	0.000339624	0.000350963	0.000329616	0.000356633	0.000340086	0.000368256	0.000386673	0.000743771	0.000819784	0.000493681	0.000616675	0.000844024	0.000330426	0.000125955	7.46e-05	0.000171409	0	7.7e-05	0.000345389	6.46e-05	0.000152253	0	0.000205491	0.000107141	5.98e-05	0.000144285	0.000174028	0.000189179	0	0.000269034	0	0.000243516	0.000159913	0.000153252	0.000201633	0.000116722	0	0.000392223	0.000102685	0.000244036	0.000154599	0.000112892
BLAST_GH310_ARATH Indole-3-acetic acid-amido synthetase GH3.10 OS=Arabidopsis thaliana GN=GH3.10 PE=2 SV=1_Q9ZNS2	0.000190186	0.00023015	0.000251351	0.00034904	0.00013887	0.000136811	0.000141884	0.000194071	0.000140385	0.000219744	0.000118878	0.000242919	0.000184128	0.000193336	0.000743771	0.000819784	0.000493681	0.00024667	0.000675219	0.000330426	0	7.46e-05	0.000457091	0.000121581	0.000192582	0.000296048	0.000193874	0.000152253	0.000260904	0.000246589	0	0.00017934	0.000288569	0.000278445	0.000252239	0.000158019	0.000403551	0.00015797	0.000243516	0.000191896	9.2e-05	0.000252042	0.000116722	0	0.000336191	0.000102685	0.000305045	0.000257666	0.000225785
Metagenome unknown	0	0	0	0	0	0	0	0	0	0	0	0.00971676	0	0	0	0.000136631	0	0	0	0	0	0	0	0.000526849	7.7e-05	0	0	0	0	0.00184942	0	0	0	0	0	0	0	0	0	0	0	0.00307491	3.89e-05	0	0	0.000410741	0	0	0
BLAST_HBD_CLOAB 3-hydroxybutyryl-CoA dehydrogenase OS=Clostridium acetobutylicum (strain ATCC 824 / DSM 792 / JCM 1419 / LMG 5710 / VKM B-1787) GN=hbd PE=1 SV=2_P52041	4.75e-05	0.000172612	0.000188513	0.000814427	0.00013887	0.000228019	0.000141884	0.000339624	0.000140385	0.00027468	0.000118878	0.00038867	0.000276192	0	0	0.000136631	0	0	0	0.00013217	0	0.000111865	0	0.000243161	0	0.000986826	0.000193874	0	0	0	0	0.00083692	0.000144285	0.000174028	0.000882835	0	0	0.000263283	0.000487033	0	0.000306504	0.000100817	0.000116722	0	5.6e-05	0	0.0006711	0.000206132	0.00101603
BLAST_PYCB_METJA Pyruvate carboxylase subunit B OS=Methanocaldococcus jannaschii (strain ATCC 43067 / DSM 2661 / JAL-1 / JCM 10045 / NBRC 100440) GN=pycB PE=1 SV=1_Q58628	0.00014264	0.000115075	6.28e-05	0	0	0.000136811	0.000106413	0.000242589	0.000842312	0.000384552	0.000118878	0.000145751	9.21e-05	6.44e-05	0.000185943	0.000136631	0	0.000123335	0.00033761	0.000330426	0	7.46e-05	0.000228545	4.05e-05	0.000269614	0.000690778	0.000129249	0	4.35e-05	0.000534276	0	0.00017934	7.21e-05	0.00055689	0.000315298	0	0	0	0.000547912	0.000543704	0.000582358	0.000151225	0.00015563	0	0.000392223	0	0.000610091	0.000206132	0.000112892
Metagenome unknown	9.51e-05	0.000115075	0.000125676	0.000465387	0.00013887	0	0.000177355	4.85e-05	0.000140385	0.000164808	0.000475511	0	0.000276192	0.000257782	0.000371885	0.000546523	0.000296209	0	0.000168805	6.61e-05	0.00025191	0.000186442	0.000342818	8.11e-05	0.000269614	0	0.000452372	0.00022838	0.00021742	8.22e-05	0.000267852	0.00023912	0.000108213	6.96e-05	0.000378358	0.000210693	0.000403551	0.000263283	0	0.000287843	3.07e-05	0.000151225	0.000233445	0.00171788	0.000280159	0.00020537	0.000305045	0.000103066	0.000169338
BLAST_ACRR_ECOLI HTH-type transcriptional regulator AcrR OS=Escherichia coli (strain K12) GN=acrR PE=1 SV=1_P0ACS9	0.00014264	0.00023015	0.000251351	0.000465387	0.00013887	0.000228019	0.000141884	0.000194071	0.000140385	0.00027468	0.000475511	0.000145751	0.00046032	0.000322227	0.000371885	0.000409892	0.000197472	0.00049334	0.00033761	0.000198255	0.000125955	0.000111865	0.000342818	0.000162107	0.000115549	0.000148024	0.000258498	0.000152253	0.00021742	0.000205491	0.000267852	0.0002989	7.21e-05	0	0.000378358	0.000210693	0.000269034	0.00015797	0.000365275	0.00012793	0.000122602	0.00030245	0.000194537	0.000381752	0.000224127	0.00020537	0.000244036	0.000206132	0.000112892
BLAST_TMP_BPP2 Probable tape measure protein OS=Escherichia phage P2 GN=T PE=3 SV=1_O64314	0.000237733	0.000115075	0.000125676	0.00104712	0.00013887	9.12e-05	0.000212826	0.000194071	3.51e-05	0.000164808	0.000237756	0.000145751	0.0012889	0.0007089	0.000185943	0	0.000394945	0.000123335	0	6.61e-05	0	7.46e-05	0.000114273	4.05e-05	0.000346647	0	0.00071087	0.00022838	0.000260904	0.000246589	0.000160711	0.0002989	0.000180356	3.48e-05	0.000315298	0.000474058	0.000269034	0.000473909	0.000304395	0.000255861	0	0.000100817	0	0.00114526	0.000112064	0	0.000427064	0.000103066	0.000282231
Metagenome unknown	0.00014264	0.000172612	0.000251351	0	0	9.12e-05	0.00067395	0.000194071	0.000280771	0.000384552	0.000356633	0.000631589	0.000276192	0.00232004	0	0.00122968	0	0	0	0.000594766	0	0	0.000457091	0	0	9.87e-05	0.000323123	0	0	4.11e-05	0	0	0.000288569	0.00031325	0.000315298	0	0	0.000263283	6.09e-05	0.000319826	3.07e-05	0	0	0	0.000280159	0	0.000183027	5.15e-05	5.64e-05
BLAST_PFKA2_THET8 ATP-dependent 6-phosphofructokinase 2 (Fragment) OS=Thermus thermophilus (strain HB8 / ATCC 27634 / DSM 579) GN=pfkA2 PE=1 SV=3_P21778	0.00028528	0.000402762	0	0	4.63e-05	0.000410434	0.000461124	0.000194071	0.000561541	0.00054936	0	0.000680173	0.000276192	0.000128891	0.00111566	0.000409892	0.000296209	0.000370005	0.000168805	0.00013217	0	0.000745768	0.000399954	8.11e-05	0.000115549	0.000592096	0	0	0	0.000123294	0	5.98e-05	0	0.000452473	0.000126119	0.000790097	0.000538068	0	0.000243516	0.000383791	0.000337154	0.00030245	0.00031126	0.000572628	0.000224127	0	0.000183027	0.000206132	0
Metagenome unknown	0	0.000747986	0	0	0.00175902	0.000547246	0.000283768	0.000145553	3.51e-05	0.00027468	0	0	0	0	0	0	0.00167851	0.00024667	0	0.00125562	0	0.000261019	0	0.000202634	0	0	0	0	0	0	0	0.00011956	0	0.000278445	0.00151343	0	0	0	0	0	0.000490406	0	0	0	0	0	0	0	0
Metagenome unknown	0.000475466	0	0	0.00104712	0	9.12e-05	0.00031924	0	0.000245674	0	0.000237756	0	0	0.000193336	0.000185943	0.000136631	0	0	0	0	0.000419851	0	0.000571363	0.000324215	0.000539229	0	0.000387747	0.00034257	0.000391355	0.000369883	0.000589275	0.00023912	0.000288569	0	0.000189179	0.000263366	0	0.000526565	0	0.000223878	0	0	0	0.000572628	0	0	0.000183027	0.000360732	0.000451569
BLAST_RS8_LACP7 30S ribosomal protein S8 OS=Lachnoclostridium phytofermentans (strain ATCC 700394 / DSM 18823 / ISDg) GN=rpsH PE=3 SV=1_A9KJI0	0.000475466	0.000345224	0.000188513	0.00034904	0	0.00036483	0.000177355	0.000194071	0.000491349	5.49e-05	0.000356633	0.000680173	0.000368256	0.000128891	0.000557828	0.000136631	0	0	0	0.00013217	0	0	0.000228545	0	0.000269614	0.000246706	0.000129249	0	8.7e-05	0.000164393	0	0.0005978	0.000108213	0.00031325	0	0	0	0.000263283	0.000487033	0.000351809	0.000122602	0.000252042	3.89e-05	0	0.000728414	0.000462083	0.0006711	0.000309199	0
BLAST_RL10_THEP3 50S ribosomal protein L10 OS=Thermoanaerobacter pseudethanolicus (strain ATCC 33223 / 39E) GN=rplJ PE=3 SV=1_B0KCJ0	0	0.000345224	0.000251351	0.000465387	0	0	0.000248297	0.000242589	0.000596638	0.000109872	0.000118878	0.000534422	0.00046032	0.000257782	0.000371885	0.000409892	9.87e-05	0.00024667	0.000168805	0.00026434	0	0	0.000342818	0	0.000115549	9.87e-05	0	0	0	0.000328785	0	0.0002989	7.21e-05	0.000174028	0.000189179	0	0.000134517	0.00015797	0.000182637	6.4e-05	0.000275854	0.000201633	0	0	0.000392223	0.00020537	0.000854127	0.000257666	0
BLAST_CUCIN_ORYSI Cupincin OS=Oryza sativa subsp. indica GN=OsI_13867 PE=1 SV=1_B8AL97	9.51e-05	0.000172612	0.000314189	0	0	0.000912076	3.55e-05	4.85e-05	0	0.000714168	0	0	9.21e-05	0.000193336	0.00185943	0	0	0.00024667	0	0.000859107	0	0	0.000228545	0	0	0.00039473	0.000193874	0	8.7e-05	8.22e-05	0.000214282	0	0.000180356	0.00031325	0	5.27e-05	0.000672585	0.000473909	0	0.000255861	0.000367805	0	0	0.000190876	0.00061635	0.000256713	0.000305045	0.000463798	0
BLAST_PBPB_ECOLI Penicillin-binding protein 1B OS=Escherichia coli (strain K12) GN=mrcB PE=1 SV=2_P02919	9.51e-05	0.000115075	0.000125676	0.000465387	0.00013887	0	0.000177355	4.85e-05	0.000140385	0.000164808	0.000475511	0	0.000276192	0.000257782	0.000371885	0.000273261	0.000296209	0	0.000168805	6.61e-05	0.000209925	0.000186442	0.000342818	8.11e-05	0.000346647	0	0.000452372	0.00022838	0.00021742	8.22e-05	0.000267852	0.00023912	0.000108213	6.96e-05	0.000378358	0.000210693	0.000403551	0.000263283	0	0.000287843	3.07e-05	0.000151225	0.000233445	0.00133613	0.000280159	0.000154028	0.000305045	0.000103066	0.000169338
BLAST_EUTE_SALTY Ethanolamine utilization protein EutE OS=Salmonella typhimurium (strain LT2 / SGSC1412 / ATCC 700720) GN=eutE PE=4 SV=2_P41793	0.000618106	0.00120828	6.28e-05	0.00034904	0.00134241	4.56e-05	0.000567537	0.000776285	0.000280771	0	0	0.000583005	0.00046032	0.000451118	0.000185943	0.00136631	0.000394945	0	0.000168805	0.00026434	0	0	0	0	0	0.000345389	0.000258498	0	0	0	0	0	0.000144285	0	0.000378358	0	0	0.000210626	0.000547912	0	0	0.00030245	7.78e-05	0	0.000280159	0	0.000488073	0.000257666	0
BLAST_ACKA_THETC Acetate kinase OS=Thermoanaerobacterium thermosaccharolyticum (strain ATCC 7956 / DSM 571 / NCIB 9385 / NCA 3814) GN=ackA PE=3 SV=2_Q59331	0	0.000172612	0.000377027	0	0	0.00095768	0.000496595	0.000921838	0.00122837	0.000439488	0	9.72e-05	0.000368256	0.000257782	0	0	0.00157978	0	0.000675219	0.00013217	0	0.000111865	0	0.000243161	0	0.000740119	0	0	0	0	0	0.00035868	0	0.000452473	0.000630597	0	0	0	0.000243516	0	0.000275854	0	0.00031126	0.000190876	0	5.13e-05	0	0.000463798	0.000112892
Metagenome unknown	0.00014264	0.000115075	0.000125676	0.000232693	0.000185159	4.56e-05	3.55e-05	0	0	0	0	4.86e-05	0.000184128	6.44e-05	0.000557828	0	9.87e-05	0	0.000506415	0.00013217	0.00025191	3.73e-05	0.000171409	0.000162107	0.000231098	4.93e-05	0.000452372	0.000190317	0.00021742	0.000328785	0.000160711	0	0.00032464	3.48e-05	0.000504477	0.000579405	0	0.000315939	0.000243516	0.000287843	0.000337154	0	0.00015563	0.000572628	0.000112064	0.000154028	0.000183027	0	5.64e-05
FTN_BACFR Bacterial non-heme ferritin OS=Bacteroides fragilis (strain YCH46) GN=ftnA PE=1 SV=1	0.000760746	0	0	0.000116347	0.000509189	0	0.000212826	4.85e-05	7.02e-05	0	0.000237756	0.000485838	9.21e-05	0	0	0.000409892	0	0	0.000844024	0.00026434	0	0	0.000228545	0	0.000231098	0.00039473	0	0.000152253	0	0.000410981	0	0.00011956	0.00032464	0.00031325	0	0	0	0	0.000365275	0.000191896	0	5.04e-05	0	0	0.000112064	0.000102685	0.000366055	0	0.000112892
BLAST_BACA1_BACC1 Calcium-transporting ATPase 1 OS=Bacillus cereus (strain ATCC 10987 / NRS 248) GN=BCE_0519 PE=1 SV=1_Q73E41	0.000237733	0.00023015	0.000251351	0.000465387	0.000231449	0.000228019	0.000141884	9.7e-05	0.000140385	0.000164808	0.000475511	0.000145751	0	0.000193336	0.000185943	0.000409892	0	0.000123335	0.00033761	0.00026434	0.000419851	0.000111865	0.000342818	0.000162107	0.000192582	0.000148024	0.000193874	0.00022838	0.000260904	0.000287687	0.000214282	0.00017934	0.000252498	0	0.000315298	0.000210693	0.000269034	0.000210626	0.000121758	0.000191896	9.2e-05	0.000252042	0.00015563	0.000190876	0.000224127	0.000256713	0.000122018	0.000154599	0.000338677
BLAST_TFF3_HUMAN Trefoil factor 3 OS=Homo sapiens GN=TFF3 PE=1 SV=1_Q07654	0	0	0	0.000116347	0	0.000182415	0	4.85e-05	0.000105289	0.000164808	0	0.000145751	9.21e-05	0	0	0	0	0	0	0.00013217	0.000293895	0.000186442	0.000342818	0.000486322	0.000385164	9.87e-05	0.000452372	0.000418697	0.000521807	0.000205491	0.000374993	0.0002989	0.000216427	6.96e-05	0.000252239	0.000421385	0	0.000421252	0.000365275	0.000351809	0.000214553	0.00030245	0.00031126	0	0.000280159	0.000410741	0.000305045	0.000360732	0.000338677
ALF_SHIFL Fructose-bisphosphate aldolase class 2 OS=Shigella flexneri GN=fbaA PE=3 SV=2	0	0	0	0	0	0	0	0	3.51e-05	0	0	0	0	0	0	0	0	0	0	0	0	0.00268476	0	0	0	0	0	0	0	0	0	0	0	0	0	0.00115881	0.00295938	0.000210626	0	0	0	0.00131062	0	0	0.0022973	0.000102685	0	0	0
Metagenome unknown	0	0.000345224	0	0	0	0	0	0	0	0	0	0	0	0	0	0	0	0	0.00219446	0	0	0.00022373	0	0	0	0	0	0	0	0	0	0.00071736	0	0	0	0	0	0.000684535	0	0	0	0	0.00062252	0	0	0	0	0	0.00321743
BLAST_SAT1_CRIGR Diamine acetyltransferase 1 OS=Cricetulus griseus GN=SAT1 PE=2 SV=1_Q9JHW6	0.000380373	0.000115075	0	0.00034904	0.000416609	0.000136811	0.000177355	9.7e-05	0.000105289	0.000164808	0.000237756	0.000145751	0.000276192	0.000193336	0.000557828	0.000136631	0.000296209	0.000123335	0.000506415	6.61e-05	0.000965656	7.46e-05	5.71e-05	0.000121581	0.000269614	0.000148024	0.000258498	0.000266443	0.000260904	8.22e-05	0	0.0002989	0.000288569	0.000104417	0.000315298	0.000263366	0.000134517	0.00015797	6.09e-05	0.000447756	6.13e-05	5.04e-05	0.000194537	0	0.000168095	5.13e-05	0.000122018	0	5.64e-05
BLAST_PTA_SHIFL Phosphate acetyltransferase OS=Shigella flexneri GN=pta PE=3 SV=2_P0A9M9	0	0	0	0	0	0	0	4.85e-05	0	0	0	4.86e-05	0	0	0	0	0	0	0	0	0.000377865	0.00152882	0.000114273	0.000202634	0.000231098	0	0	0	0.000347871	0.000328785	0	0	0	0	0	0.00331841	0.000403551	0	0	0	0	0.00216756	0	0	0.000952541	0	0	0.000154599	0
BLAST_RL4_AGARV 50S ribosomal protein L4 OS=Agathobacter rectalis (strain ATCC 33656 / DSM 3377 / JCM 17463 / KCTC 5835 / VPI 0990) GN=rplD PE=3 SV=1_C4ZBD5	0	0.000517837	6.28e-05	0.00104712	0	0	7.09e-05	0.000485178	0.000456252	0.000659232	0	0.000485838	0.000368256	0.000386673	0.000557828	0.000409892	0.000691153	0	0.000506415	0	0	0	0	0	0.000154065	0.000197365	6.46e-05	0.00011419	8.7e-05	0	0	5.98e-05	0	0	0.000189179	0.000895444	0	0.000105313	0	0.000255861	0	0	0	0.000954381	0.000504286	0.000102685	0.0006711	0.000515331	0
Metagenome unknown	0	0.000172612	0.000125676	0.00034904	0	0.000228019	7.09e-05	4.85e-05	0.000210578	0.000219744	0	0.000145751	9.21e-05	0	0.000371885	0.000273261	0	0.000123335	0.000168805	0.00013217	0	0.00022373	0.000285682	8.11e-05	0.000154065	0.000641437	0.000193874	0	0	0.000739767	0	0.00023912	0.000144285	0.000626501	0.000126119	0	0.000269034	0.000210626	0.00066967	6.4e-05	0.000153252	0.000100817	0	0.000190876	0.000168095	0	0.000549082	0	0
BLAST_RS5_CLOTH 30S ribosomal protein S5 OS=Clostridium thermocellum (strain ATCC 27405 / DSM 1237 / NBRC 103400 / NCIMB 10682 / NRRL B-4536 / VPI 7372) GN=rpsE PE=3 SV=1_A3DJI9	0.00161658	0.000690449	0	0.000465387	0.000462899	0.000136811	0.000390182	0.000194071	0.000315867	0.00027468	0.000237756	0.000437254	0	0.000644454	0.000557828	0.00122968	0.000493681	0.000616675	0.000506415	0	0	0	0	0	0.000231098	0.000444072	0	0	8.7e-05	8.22e-05	0	0.00011956	0.000180356	0.000174028	0	0	0	0	0.000121758	0.000351809	9.2e-05	0.000151225	0	0.000190876	0.000224127	0.000102685	0.000366055	0	0
BLAST_DLD_ARCFU D-lactate dehydrogenase (acceptor) OS=Archaeoglobus fulgidus (strain ATCC 49558 / VC-16 / DSM 4304 / JCM 9628 / NBRC 100126) GN=dld PE=1 SV=1_O29853	0.000523013	0.000863061	0.000879729	0.00034904	0	0.000228019	0	0.000388142	0.000175482	0	0	0.000680173	0.000368256	0.000128891	0	0.000136631	0.000493681	0	0.00033761	0.000198255	0	3.73e-05	0	0	0	0.00187497	0	0	0	0	0	0	0.000396782	0.000139222	0.000252239	0	0	5.27e-05	0.000182637	0	6.13e-05	0.000201633	0	0	0.000280159	0	0.000183027	0	0.00254008
BLAST_SUDHA_PYRFU Sulfide dehydrogenase subunit alpha OS=Pyrococcus furiosus (strain ATCC 43587 / DSM 3638 / JCM 8422 / Vc1) GN=sudA PE=1 SV=1_Q8U195	0.000237733	0.000690449	0.000125676	0.000232693	0.00013887	9.12e-05	0.000141884	0.000388142	0.000140385	0.000109872	0	0.000340086	9.21e-05	0.000128891	0.000185943	0.000136631	9.87e-05	0.000123335	0.000168805	0	0	0	0.000285682	0	0	0.000740119	0	0	0	0.000287687	0.000107141	0.00011956	0.000288569	0.00107897	0	0	0	0	0.000974066	6.4e-05	0.000429106	0.000201633	0	0.000381752	0.000392223	0	0.000244036	0.000154599	0
BLAST_SDHB_BACSU Succinate dehydrogenase iron-sulfur subunit OS=Bacillus subtilis (strain 168) GN=sdhB PE=3 SV=3_P08066	0	0	0	0	0	0.000456038	0.000212826	0	0	0	0	4.86e-05	0	0.000322227	0	0.000546523	9.87e-05	0.000863345	0.000168805	0	0	0.00108136	0.000114273	0.000445795	7.7e-05	0.000148024	0	0	0.000347871	4.11e-05	0	0	0.000180356	0.000348056	0	0	0.000672585	0	0.000243516	0.000287843	0.000704959	0	0.0010505	0	0.000112064	0.000821482	0	0.000154599	0
BLAST_RPSX_BACTK Putative RNA polymerase sigma-G factor (Fragment) OS=Bacillus thuringiensis subsp. kurstaki PE=3 SV=1_P26768	0.00014264	0.00023015	0.000188513	0	4.63e-05	0.000228019	7.09e-05	0.000242589	0.000175482	0.00027468	0.000237756	0.000242919	0	0	0.000557828	0.000136631	0.000296209	0.000616675	0.00033761	0.00026434	0.000293895	0.000186442	0.000228545	0.000121581	0.000231098	0.000246706	0.000193874	0.000266443	0.000173936	0.000205491	0.000107141	0.00017934	0.000180356	0.000174028	0	0	0.000403551	0	0.000304395	0.000159913	0.000214553	0.000252042	0.00015563	0.000572628	0.000280159	0.000359398	0.000244036	0.000206132	0.000169338
Metagenome unknown	0	0	0	0	0.003194	0.000501642	0	0	0	0	0	0	0	0.000193336	0	0	0	0.00148002	0	0.00013217	0	0.00126781	0.000114273	0.000162107	0	0	0	0	0	0	0	0.00011956	7.21e-05	0	0	0	0	0	0.000304395	0	0	0.000403266	0	0	0	0.00210505	0	0	0
SEC31_LODEL Protein transport protein SEC31 OS=Lodderomyces elongisporus (strain ATCC 11503 / CBS 2605 / JCM 1781 / NBRC 1676 / NRRL YB-4239) GN=SEC31 PE=3 SV=1	0.000190186	0.00023015	0.000251351	0.00034904	0.00013887	0.000136811	0.000141884	0.000194071	0.000140385	0.000219744	0.000118878	0.000242919	0.000184128	0.000193336	0.000743771	0.000546523	0.000493681	0.00024667	0.000675219	0.000330426	0	3.73e-05	0.000399954	0.000121581	0.000192582	0.000296048	0.000193874	0.000152253	0.000260904	0.000246589	0	0.00017934	0.000216427	0.000208834	0.000252239	0.000158019	0.000269034	0.00015797	0.000243516	0.000159913	6.13e-05	0.000252042	7.78e-05	0	0.000280159	0.000102685	0.000305045	0.000257666	0.000225785
BLAST_MALH_FUSMR Maltose-6-phosphate glucosidase OS=Fusobacterium mortiferum GN=malH PE=1 SV=1_O06901	0.00014264	0.000115075	0.000188513	0.000232693	4.63e-05	4.56e-05	0.000141884	4.85e-05	7.02e-05	0.000109872	0.000118878	0	0.000184128	0.000128891	0.000743771	0	9.87e-05	0.000123335	0.000168805	0.000198255	0.000209925	7.46e-05	0.000228545	0.000121581	0.000115549	0	0.000387747	0.000190317	0.000260904	8.22e-05	0.000321423	0.00035868	0.000180356	6.96e-05	0.000315298	0.000105346	0	0.000315939	6.09e-05	0.000191896	0	0.000100817	7.78e-05	0.000381752	5.6e-05	0.000102685	0.000244036	0.000103066	0.000112892
BLAST_FLA_BACHD Flagellin OS=Bacillus halodurans (strain ATCC BAA-125 / DSM 18197 / FERM 7344 / JCM 9153 / C-125) GN=hag PE=1 SV=1_Q05203	0	0.00109321	6.28e-05	0	0.000648058	0	0.00031924	0.000194071	0.000491349	0.000878976	0	0	0.000276192	0	0	0	0.000493681	0	0.000168805	0.00013217	0.000923671	0	0	8.11e-05	0.000693294	0.000197365	0	0.00209348	0	0.000328785	0	0	0.000180356	0.00087014	0	0.000105346	0	0	0	0	0.00125667	0.00030245	0	0	0	0	0	0.000154599	0
BLAST_RL18_AGARV 50S ribosomal protein L18 OS=Agathobacter rectalis (strain ATCC 33656 / DSM 3377 / JCM 17463 / KCTC 5835 / VPI 0990) GN=rplR PE=3 SV=1_C4ZBT4	0.000808292	0.000460299	0	0.000581734	0.000185159	0.000228019	0.000141884	0.000194071	0.000140385	0.000109872	0.000237756	0.000340086	0	0.000257782	0.00204537	0.00109304	0.000197472	0	0	0	0	0	0.000399954	0	0.000154065	0.000641437	6.46e-05	0.000152253	8.7e-05	0.000205491	0	0.00011956	0.000180356	0.000139222	6.31e-05	0	0	0.000210626	6.09e-05	0.000319826	0.000214553	0.000151225	3.89e-05	0	0.000448255	0.000256713	0.000244036	0	0
BLAST_RPRY_BACFR Transcriptional regulatory protein RprY OS=Bacteroides fragilis (strain YCH46) GN=rprY PE=3 SV=2_Q9AE24	0.00014264	0.000345224	0.000125676	0	0	0.000228019	0.000283768	0	7.02e-05	5.49e-05	0	0.000242919	0	0	0.000185943	0	0	0.00049334	0	0.00026434	0	0.00100679	0.000514227	0.000121581	0	0.000493413	0	0.00034257	0.000260904	0.000616472	0	0	0.000468925	0.000522084	0	0	0.000134517	0	0	0.000287843	0.000459756	0.0006049	0.00077815	0	0	0.00020537	0.000488073	0.000360732	0.000677354
BLAST_RL17_EUBE2 50S ribosomal protein L17 OS=Eubacterium eligens (strain ATCC 27750 / VPI C15-48) GN=rplQ PE=3 SV=1_C4Z2V8	0.00128376	0.000402762	0	0.00034904	0.00013887	0.000136811	0	0.000242589	0.000105289	0.000109872	0	0.000194335	0.000276192	0.000386673	0.00111566	0.000273261	0	0	0	0.00026434	0	0	0.000685636	0	0.000500713	0.000246706	6.46e-05	0.000380633	0.000347871	0.000246589	0.000160711	0.00011956	0.000216427	0.000139222	0.000252239	0.000263366	0	0.000105313	0	0.000607669	0.000183902	0.000201633	0.00015563	0	0.000392223	0.00020537	0.000244036	0	0
Metagenome unknown	0	0	0	0	0	0	0	0	0	0	0	0	0	0	0.000929714	0	0	0	0	0	0	0	0.000399954	0	3.85e-05	0	0	0.00125609	0.00156542	0	0	0	7.21e-05	0	0	0.00258099	0	0	0	0.00159913	0	0	0	0.000381752	0.000168095	0	0	0	0
Metagenome unknown	0.000237733	0.000172612	6.28e-05	0.000232693	0.000231449	9.12e-05	0	0.000145553	0.000140385	0.000109872	0	0.000145751	0.000736513	0.000515564	0.000185943	0.000273261	9.87e-05	0.000123335	0.00033761	0	0.000503821	0	0.000457091	8.11e-05	0.00042368	0	0.000387747	0.000266443	0.000391355	0.000123294	0.000589275	0.00017934	0.00032464	3.48e-05	0.000189179	0.000316039	0	0.000210626	0.000182637	0.000383791	3.07e-05	0.000151225	7.78e-05	0.000381752	0.000448255	0.000102685	0.000183027	0	0.000169338
BLAST_PUR9_CLOAB Bifunctional purine biosynthesis protein PurH OS=Clostridium acetobutylicum (strain ATCC 824 / DSM 792 / JCM 1419 / LMG 5710 / VKM B-1787) GN=purH PE=3 SV=1_Q97J91	0.00014264	0	0	0.000232693	0.00129612	0.000592849	0.00202185	9.7e-05	7.02e-05	0.000384552	0.000237756	0.000242919	9.21e-05	0.000515564	0.000185943	0	0	0.00172669	0.000168805	0	0	0.00119323	0	4.05e-05	0	4.93e-05	0	0	0	0.000164393	0	0	0	0.000174028	6.31e-05	5.27e-05	0.000269034	0	0	0.000383791	0.000551707	0.000756125	0.000583612	0.000190876	0	0.000513426	6.1e-05	0.000206132	0
BLAST_SCPC_ECOLI Propionyl-CoA:succinate CoA transferase OS=Escherichia coli (strain K12) GN=scpC PE=1 SV=1_P52043	0.00014264	0.000345224	0.000314189	0.000232693	9.26e-05	0.000273623	0.000141884	0.000242589	0.000210578	0.000329616	0.000237756	0.000291503	0.000368256	0	0.000371885	0.000409892	9.87e-05	0.00049334	0.00033761	0.00026434	0.00025191	0.000149154	0.000114273	0.000121581	0.000192582	0.000148024	0.000129249	0.000190317	0.000173936	0.000164393	0.000107141	0.00011956	0.000144285	0.000104417	0.000189179	0	0.000269034	0.000105313	0.000365275	9.59e-05	0.000183902	0.000151225	0.000116722	0.000190876	0.000280159	0.00020537	0.000183027	0.000154599	0.000225785
BLAST_ADHE_ECOLI Aldehyde-alcohol dehydrogenase OS=Escherichia coli (strain K12) GN=adhE PE=1 SV=2_P0A9Q7	0	0.0023015	0	0	0	0.000456038	0	0.0021833	0	0	0	0.000923092	0	0	0	0	0.0035545	0.00123335	0	0	0	0	0	0	0	4.93e-05	0	0	0	0	0	0	0	0.00160106	0	0	0	0	0	0	0	0	7.78e-05	0	0	0	0	0	0
BLAST_YGEW_ECOLI Putative carbamoyltransferase YgeW OS=Escherichia coli (strain K12) GN=ygeW PE=1 SV=2_Q46803	0.000475466	0	0	0	9.26e-05	0	0.000212826	0	7.02e-05	0.000219744	0	0.000825924	0	0	0	0	0	0	0	0.000396511	0.000419851	0	0.000228545	0	0.000115549	0.000592096	0	0	0.000260904	0.000986355	0	0	0.000432854	0.000730918	0.000378358	0	0	0	0.000730549	0.000223878	0.000551707	0.000655308	0	0	0	0.00020537	0.000305045	0.000309199	0
Metagenome unknown	0.00014264	0.000115075	6.28e-05	0.000116347	9.26e-05	0	3.55e-05	0	0	0	0	4.86e-05	0	0.000128891	0	0	9.87e-05	0	0	0.00013217	0.000839701	0	0.000399954	8.11e-05	0.000269614	4.93e-05	0.000452372	0.00034257	0.000521807	0.000328785	0.000107141	0.00017934	0.000216427	0	0.000252239	0.000368712	0	0	0.000182637	0.000255861	0.000214553	5.04e-05	7.78e-05	0	0.000224127	0.000154028	6.1e-05	0	0.000112892
Metagenome unknown	0.00028528	0	0	0	0	0	0	0.000145553	7.02e-05	0	0	0.000728757	0	0	0	0	0.000197472	0	0.00101283	0	0	0	0.00182836	0	0	0	0	0	0.000434839	0	0	0	0.00353497	0	0.00126119	0	0	0	0	0	0	0.0012098	0	0.000190876	0	0	0.000427064	0	0
BLAST_MALK_THELN Trehalose/maltose import ATP-binding protein MalK OS=Thermococcus litoralis (strain ATCC 51850 / DSM 5473 / JCM 8560 / NS-C) GN=malK PE=1 SV=1_Q9YGA6	0.000190186	0.000172612	0.000251351	0.00034904	0.000185159	0.000182415	0.000177355	0.000291107	0.000210578	0.00027468	0.000118878	0.000194335	0.000276192	0.000257782	0.000557828	0.000546523	0.000493681	0.000370005	0.000506415	0.000330426	0	0.000261019	0.000228545	0	7.7e-05	0.000345389	0.000258498	0	8.7e-05	0.000164393	0.000160711	0.00017934	0.000144285	6.96e-05	0.000252239	0	0.000269034	0.00015797	0.000182637	0.00012793	0.000153252	0.000201633	0.000116722	0	0.000280159	0.000154028	0.000244036	0.000154599	0
BLAST_RL2_BACV8 50S ribosomal protein L2 OS=Bacteroides vulgatus (strain ATCC 8482 / DSM 1447 / JCM 5826 / NBRC 14291 / NCTC 11154) GN=rplB PE=3 SV=1_A6KYJ2	9.51e-05	0.000115075	0.000125676	0.000116347	0	0.000228019	0	9.7e-05	0	0	0	0.00038867	0	0.000386673	0	0.000683153	0	0.00172669	0.000844024	0	0	0.000969498	0.0006285	0.000202634	0.000385164	0	0	0	0.0010871	0	0	0.00017934	0.00032464	0.000208834	0	0.000263366	0.000807103	0.00015797	0	0.0007356	0.000613008	0	0.000972687	0	0.000168095	0.000256713	6.1e-05	0.000103066	5.64e-05
Metagenome unknown	0.000190186	0.00023015	0.000251351	0.00034904	0.00013887	0.000136811	0.000141884	0.000194071	0.000140385	0.000219744	0.000118878	0.000242919	0.000184128	0.000193336	0.000743771	0.000546523	0.000493681	0.00024667	0.000506415	0.000330426	0	3.73e-05	0.000399954	0.000162107	0.000192582	0.000246706	0.000193874	0.00011419	0.000260904	0.000246589	0	0.00017934	0.000216427	0.000208834	0.000252239	0.000158019	0.000269034	0.00015797	0.000243516	0.000159913	6.13e-05	0.000252042	7.78e-05	0	0.000280159	0.000102685	0.000305045	0.000257666	0.000225785
BLAST_YCLK_BACSU Sensor histidine kinase YclK OS=Bacillus subtilis (strain 168) GN=yclK PE=3 SV=1_P94414	0.000237733	0.000287687	0.000251351	0	0.000231449	0.000182415	0.000177355	0.000194071	0.000210578	0.000164808	0.000475511	0.000194335	0	0.000322227	0.000557828	0.000546523	0.000296209	0.00049334	0.000675219	0.00013217	0.00016794	0.000149154	0	0.000162107	0.000154065	0.000148024	0.000258498	0.000152253	0.00021742	0.000164393	0.000321423	0	0.000180356	6.96e-05	0	0.000210693	0.000269034	0	0.000304395	0.000159913	9.2e-05	0.000252042	0.000194537	0.000381752	0	0.00020537	0.000122018	0.000206132	0.000338677
MUTL_CHLPB DNA mismatch repair protein MutL OS=Chlorobium phaeobacteroides (strain BS1) GN=mutL PE=3 SV=1	4.75e-05	0.000115075	0.000125676	0.000116347	0.000231449	9.12e-05	0	4.85e-05	0	5.49e-05	0	4.86e-05	9.21e-05	0.000128891	0	0.000409892	0.000394945	0	0.000168805	0	0.000125955	0	0.000171409	0.000162107	0.000269614	0.000148024	0.000581621	0.000266443	0.000173936	0.000328785	0.000267852	0.0002989	0.000216427	6.96e-05	0	0.000210693	0	0.000368596	0.000243516	0.000287843	0.000214553	0.000201633	0.000194537	0.000954381	0.000112064	0.000359398	0.000244036	0	0.000225785
Metagenome unknown	0.000237733	0	0	0	0	0	0.000248297	0	0.000350963	0	0	0	0	0.000644454	0.00185943	0.00204946	0	0.00074001	0.00270088	0	0	0	0	0	0	0.000740119	0	0	0	0	0	0.00083692	0	0	0	0	0	0	0.000304395	0.00086353	0	0	0	0	0	0	0	0	0
BLAST_SYS_SALRD Serine--tRNA ligase OS=Salinibacter ruber (strain DSM 13855 / M31) GN=serS PE=3 SV=1_Q2S1G4	0	0.000345224	0.000502702	0.00034904	0	0.000182415	0.000425653	0.000194071	0.000210578	0	0	0.000340086	9.21e-05	0.000386673	0	0	0.000296209	0.000123335	0.000168805	0.000330426	0	0.000596614	0.000399954	0	0.000346647	9.87e-05	0.000258498	0	8.7e-05	0	5.36e-05	0.00035868	0.000144285	0.00031325	0.000126119	0.000316039	0.000134517	0.000210626	0.000243516	9.59e-05	0.000245203	0.00030245	0.00031126	0.000190876	0.000112064	0.00020537	0.000244036	0.000257666	0.000225785
Metagenome unknown	0.000237733	0.000287687	0.000251351	0	0.000231449	0.000182415	0.000177355	0.000194071	0.000210578	0.000164808	0.000475511	0.000194335	0	0.000322227	0.000557828	0.000409892	0.000296209	0.00049334	0.000675219	0.00013217	0.00016794	0.000149154	0	0.000162107	0.000154065	0.000148024	0.000258498	0.000152253	0.00021742	0.000164393	0.000321423	0	0.000180356	6.96e-05	0	0.000210693	0.000403551	0	0.000304395	0.000159913	9.2e-05	0.000252042	0.000194537	0.000381752	0	0.00020537	0.000122018	0.000206132	0.000338677
BLAST_FLA_BACHD Flagellin OS=Bacillus halodurans (strain ATCC BAA-125 / DSM 18197 / FERM 7344 / JCM 9153 / C-125) GN=hag PE=1 SV=1_Q05203	0	0	0.00201081	0	0.000833218	0	0	0	0.000456252	0	0	0	0.0012889	0	0	0	0	0	0	0.000991277	0	0	0	0	0	0.00335521	0	0	0	0	0	0	0	0.00055689	0	0	0	5.27e-05	0.0026178	0	0	0	0	0	0	0	0.000915136	0	0
BLAST_KPYM_PONAB Pyruvate kinase PKM OS=Pongo abelii GN=PKM PE=2 SV=3_Q5NVN0	0	0	0	0	0	0	0.000425653	0	0	0	0	4.86e-05	0	0	0	0	0	0	0	0	4.2e-05	7.46e-05	0	0	0	9.87e-05	0	0	0	0.000123294	0.00412493	0	0	0	0	0	0.000538068	0	0	0	0.000153252	0	0.00015563	0	0	0.00118088	0	0.000721464	0
Metagenome unknown	0.000237733	0.000345224	0.000188513	0	0.000185159	0.000228019	0.000177355	0.000242589	0.000105289	0.00027468	0.000356633	0.000194335	0	0.000193336	0	0	0.000197472	0	0.00033761	6.61e-05	0.00104963	0	5.71e-05	4.05e-05	0.000346647	0.000246706	0.000258498	0.000190317	0.00160891	4.11e-05	0.000321423	5.98e-05	0.000180356	0.000104417	0	0.000316039	0	0	0.000121758	0.00118336	0.000153252	0	0.000194537	0.000381752	5.6e-05	0.000256713	0	0	0
ELNE_HUMAN Neutrophil elastase OS=Homo sapiens GN=ELANE PE=1 SV=1	0	0.000115075	0	0	0	0	0	0	0	0	0	0	0	0	0	0	0	0	0	6.61e-05	0.000461836	0	5.71e-05	4.05e-05	0.000231098	0	6.46e-05	0.00011419	0.000826195	8.22e-05	0.00160711	0	0.00407604	0	0.000126119	5.27e-05	0	0.000105313	0	0	0	0	0.00015563	0	0	0.000154028	0	0	0.00118537
BLAST_RS16_SALRD 30S ribosomal protein S16 OS=Salinibacter ruber (strain DSM 13855 / M31) GN=rpsP PE=3 SV=1_Q2S232	0	0.000345224	0.000188513	0	0.000185159	0.000456038	0.000425653	0	0	0	0	0	0	0.000193336	0.000743771	0.000683153	0	0.00172669	0.000506415	0	0	0.000708479	0.000114273	0.000364742	0.000154065	0	0	0.000152253	0	0	0	0	0	0.000139222	0	0.000526732	0.00134517	0	0	0.000415774	0.000306504	0	0.000544705	0	0.000392223	0.000718797	0.000244036	0.000309199	0
ACT_ASPOR Actin OS=Aspergillus oryzae (strain ATCC 42149 / RIB 40) GN=act1 PE=3 SV=1	4.75e-05	0.000287687	0.000125676	0	0	0.000182415	0.000141884	9.7e-05	0.000280771	5.49e-05	0.000356633	9.72e-05	0	0.000386673	0.000185943	0	0.000296209	0.00049334	0.000168805	0	8.4e-05	0.000261019	0	0.000405268	3.85e-05	0.000246706	0.000516996	0.000380633	0.000130452	0	0.000428564	0	0	6.96e-05	0	0	0.000134517	0	0	6.4e-05	0.000245203	0	0.00031126	0.000763504	0	0.000308056	0	0.000412265	0
CATG_HUMAN Cathepsin G OS=Homo sapiens GN=CTSG PE=1 SV=2	0	0.000287687	0	0	0.000185159	0	0	0	0	0.000219744	0	0	0	0	0	0	0	0	0	0	0	0	0	0	7.7e-05	0	0	0	0.00156542	0	0.00348208	0	0.00313819	0	0	0	0	0	0	0	0	0	0.000272352	0.000190876	0	0	0	0	0.000508015
Metagenome unknown	0.000665652	0	0	0.000116347	0	0	0.000141884	0	0.000175482	0	0	0	0	0	0.000371885	0	0	0	0	0	0.000461836	0	0.0006285	8.11e-05	0.0023495	0	0	0.000266443	0.00113058	0.000328785	0.000428564	0	0.000541067	0	0	0.000421385	0	0	0	0.000767582	0	0	0	0	0	0	0	0.000103066	0.000677354
Metagenome unknown	0	0	0	0	0	0	0	0	0	0	0	0.000728757	0	0	0	0	0	0	0	0.00105736	8.4e-05	0	0.000228545	0.000526849	0	0	0	0	0	0	0.00294638	0	0.000468925	0	0.000630597	0	0	0	0	0	0	0	0	0	0	0	0	0.000154599	0
BLAST_PRO20_ORYSJ Prolamin PPROL 14P OS=Oryza sativa subsp. japonica GN=PROLM20 PE=2 SV=1_Q42465	0	0	0	0	4.63e-05	0	0	9.7e-05	0	0	0	0	0	0	0	0	0	0	0	0	0	0.00216273	0	0	0	0	0	0	0	0.00127404	0	0	0.00183963	0.00348056	0	0	0.00201776	0	0	0	0	0	3.89e-05	0	0	0	0.00109816	0	0
BLAST_ACSD_MOOTH Corrinoid/iron-sulfur protein small subunit OS=Moorella thermoacetica GN=acsD PE=1 SV=2_Q07341	0.00028528	0.00023015	0	0.000465387	0.000231449	4.56e-05	0.000248297	0	0.000140385	5.49e-05	0	0.000631589	0.00046032	0	0.000371885	0.000546523	0	0	0	0	0	0	0.000342818	0	0.000154065	0.000296048	0	0	0	0.000205491	0	0	0.00032464	0.00163586	0.000189179	0	0	0.00015797	0.00194813	0.000447756	0	0.0006049	0	0	0.000280159	0	0.000488073	0	0
PRO25_ORYSJ 13 kDa prolamin C OS=Oryza sativa subsp. japonica GN=PROLM25 PE=2 SV=2	0	0.000460299	0.000125676	0	0.000694348	0	0	0.00043666	0.000140385	0.000329616	0	0.000728757	0.000184128	6.44e-05	0	0.00122968	0	0	0	0	0	0.000522037	0	0	0	0.000148024	0	0	0.00200026	0.000369883	0	0	0.000721423	0.000939751	0	0	0.00121065	0.000210626	0	6.4e-05	0	0.000705716	0.00031126	0	0	0.000667454	0.000488073	0	0.00152405
BLAST_POTA_MYCPN Spermidine/putrescine import ATP-binding protein PotA OS=Mycoplasma pneumoniae (strain ATCC 29342 / M129) GN=potA PE=3 SV=1_P75059	0.000190186	0.000172612	0.000251351	0.000232693	0.000231449	0.000136811	0.000177355	0.000242589	0.000210578	0.000109872	0.000118878	0.000194335	0.000276192	0.000386673	0.000371885	0.000409892	0.000493681	0.000370005	0.000506415	0.000330426	0	0.000261019	0.000228545	0	7.7e-05	0.000296048	0.000258498	0	8.7e-05	0.000205491	0.000160711	0.00017934	0.000144285	6.96e-05	0.000252239	0	0.000269034	0.00015797	0.000182637	0.00012793	0.000122602	0.000201633	0.000116722	0	0.000280159	0.000154028	0.000244036	0.000154599	0
BLAST_FLA_BACHD Flagellin OS=Bacillus halodurans (strain ATCC BAA-125 / DSM 18197 / FERM 7344 / JCM 9153 / C-125) GN=hag PE=1 SV=1_Q05203	9.51e-05	0.000345224	0.000377027	0	0.000370319	0.000547246	0	0.000630731	0.000280771	0.00285667	0.000594389	0.000923092	0.000644449	0	0	0	0	0	0	0.000660851	0	0	0	0	0	0.000542754	0	0	0	4.11e-05	0	0	0	0.00212314	0.000504477	0	0	0	0	0	0	0	7.78e-05	0	0	0	0	0	0
BLAST_MSME_STRMU Multiple sugar-binding protein OS=Streptococcus mutans serotype c (strain ATCC 700610 / UA159) GN=msmE PE=2 SV=2_Q00749	0	0	0	0	0	0	0.00262486	0.000485178	0.000350963	0	0	0.00165185	0	0	0	0	0.00118483	0	0	0	0	0.000149154	0	0	0	0	0.000129249	0	0	0	0	0.00023912	0	0	0	0	0	0	0	0	0.000122602	0	0	0	0.000168095	0	0.000549082	0	0
BLAST_CAD17_HUMAN Cadherin-17 OS=Homo sapiens GN=CDH17 PE=2 SV=3_Q12864	0	0	0	0	0	0.000273623	0.000248297	0.000145553	0	0	0	0	0	0	0	0	0	0	0	0	0.000923671	0.000633903	0	0.000607903	0.000962909	9.87e-05	0.000129249	0.000494823	0.000347871	0	0.000107141	0.00047824	0	0	0	0	0.000134517	0.000105313	0	0.000191896	0	0	7.78e-05	0	0	0.000616111	6.1e-05	0.000515331	0
BLAST_DARB_BPP1 Defense against restriction protein B OS=Escherichia phage P1 GN=darB PE=3 SV=1_Q71TF8	0.00014264	0.000115075	0	0.00034904	4.63e-05	0.000182415	0.000141884	4.85e-05	0.000105289	0.000109872	0.000475511	9.72e-05	0.000368256	0.000257782	0.000185943	0.000136631	0.000394945	0.000123335	0	0.000198255	0.000209925	0.000111865	0.000285682	0.000202634	0.000231098	9.87e-05	0.000258498	0.000190317	0.00021742	0.000123294	0.000267852	0.00011956	0.000180356	0.000139222	0.000378358	0.000316039	0.000269034	0.000368596	0.000121758	0.00012793	0	0.000100817	0.000116722	0	0.000280159	0.00020537	0.000183027	0.000103066	0.000282231
Metagenome unknown	0	0	0.000125676	0	0	4.56e-05	0.000177355	0	3.51e-05	0	0	0.000145751	0	0	0	0	0	0	0	0	0.00134352	0	0	0	0	0	0.000452372	0.00117996	0	0	5.36e-05	0	3.61e-05	0	0	0	0.000807103	0	0.000243516	0	0	0	0	0	0.000168095	0	6.1e-05	0	0.000620908
Metagenome unknown	0	5.75e-05	0	0	0	0	0	0	0	0	0	0.00228344	0	0	0	0	0	0	0	0	0	0	0	0	0	0.000542754	0	0	0	0.00234259	0	0	0	0.00274964	0	0	0	0	0	0	0	0.00100817	0	0	0	0	0	0	0
BLAST_RL6_BACV8 50S ribosomal protein L6 OS=Bacteroides vulgatus (strain ATCC 8482 / DSM 1447 / JCM 5826 / NBRC 14291 / NCTC 11154) GN=rplF PE=3 SV=1_A6KYI0	0	0	0	0.000116347	9.26e-05	0.000319227	0.000567537	0	0	0	0	0.000194335	0	0	0	0	0	0.00049334	0.00033761	0	0	0.00093221	0.000285682	0.000324215	0.000308131	9.87e-05	0	0	0	4.11e-05	0	0.00011956	0.000360711	0.000348056	0.000189179	0.000210693	0.000269034	0	0	0.000287843	0.000704959	0	0.00124504	0	0.000280159	0.000359398	0.000122018	0	0.000112892
Metagenome unknown	0	0.00207135	0	0	0	0	0	0.00116443	0.00200049	0	0	0	0	0	0	0	0.0010861	0	0	0.000925192	0	0	0	0	0	0	0	0	0	0	0	0	0	0.0018447	0	0	0.0055152	0	0	0	0	0	0.000544705	0	0	0	0	0	0
BLAST_MTNN_EXISA 5-methylthioadenosine/S-adenosylhomocysteine nucleosidase OS=Exiguobacterium sp. (strain ATCC BAA-1283 / AT1b) GN=mtnN PE=3 SV=1_C4L559	4.75e-05	0	0	0.000116347	0	9.12e-05	0.000212826	9.7e-05	0.000140385	5.49e-05	0.000237756	0	0.000184128	0.000128891	0	0	0	0	0	0.00026434	8.4e-05	0	0.000285682	0.000607903	0.000192582	0.000197365	0.000323123	0.000152253	0.00021742	8.22e-05	0.000160711	5.98e-05	0.000252498	0.000139222	0.000441418	0.000316039	0.000403551	0.000526565	0.000121758	0	0	5.04e-05	0.000194537	0	0.000280159	0.00020537	0.000183027	0.000154599	0.000225785
DEF3_HUMAN Neutrophil defensin 3 OS=Homo sapiens GN=DEFA3 PE=1 SV=1	0	0	0	0	4.63e-05	0	0	0	0	0	0	0	0	0.000644454	0	0	0	0	0.000168805	0	0.000377865	3.73e-05	0.000114273	0.000162107	0	0.000148024	0.000323123	0.000304507	0.00156542	0	0.000857128	0	0.00147892	0	0	0.000421385	0	0	0	0	6.13e-05	0	0	0.000190876	0.000336191	0.000102685	0	0.000309199	0
BLAST_PBPA_MYCS2 Penicillin-binding protein A OS=Mycobacterium smegmatis (strain ATCC 700084 / mc(2)155) GN=pbpA PE=3 SV=1_A0QNG3	4.75e-05	0.000287687	0.000377027	0	0	0.000273623	0.000354711	0.000339624	0.000456252	0.000384552	0	0.000194335	0.000644449	0.000386673	0.000185943	0	0.000197472	0	0	0.000198255	0	0.000298307	0	0.000243161	0	0.000345389	0.000323123	0	0	8.22e-05	0	0.00041846	7.21e-05	0.000139222	0.000441418	0	0	0.000368596	0.000487033	0	0.000367805	5.04e-05	0.00031126	0	0.000336191	0.000359398	0.000305045	0.000257666	0.000169338
Metagenome unknown	0	0	0.0018223	0.000116347	0.000740638	0.000136811	0	0	0	0.000164808	0	0.000874508	0	0	0.000743771	0	0.000493681	0	0.000675219	0	0	0	0	0	0	0	0	0	0	0	0	0	0.00180356	0	0	0.000579405	0	0	0	0.00086353	0	0	0	0	5.6e-05	0.000102685	0	0	0
CAP7_HUMAN Azurocidin OS=Homo sapiens GN=AZU1 PE=1 SV=3	0	0	0	0	0	0	0	0	0	0	0	0	0	0	0	0	0	0	0	0	0.000713746	0	0	0	0	0	0	0	0.000739227	0	0.00101784	0	0.00357104	0	0	5.27e-05	0	0	0	0	0	0	0.000116722	0.000190876	0	0	0	0	0.0014676
BLAST_YAAH_BACSU Spore germination protein YaaH OS=Bacillus subtilis (strain 168) GN=yaaH PE=2 SV=1_P37531	0.00028528	0.000115075	0	0.000232693	0.000370319	9.12e-05	0.000106413	0.000145553	0.000105289	0.000109872	0.000237756	9.72e-05	0.000276192	0.000128891	0	0	0.000296209	0	0.000168805	0.000198255	0.00033588	3.73e-05	0.000171409	0.000243161	0.000192582	0	0.000323123	0.00022838	0.000173936	0.000123294	0.000214282	0.00053802	0.000180356	0.000104417	0.000315298	5.27e-05	0.000134517	0.00015797	0.000243516	0.000191896	0.000122602	0.000201633	0.00015563	0	0.000168095	0.000102685	0.000366055	0.000206132	0.000169338
RL7_BACFR 50S ribosomal protein L7/L12 OS=Bacteroides fragilis (strain YCH46) GN=rplL PE=3 SV=1	0	0.00023015	0.000691215	0	0	0	0.000106413	9.7e-05	0.000526445	5.49e-05	0	0.000437254	0	0.000193336	0	0.000409892	0	0	0	0.000330426	0	3.73e-05	0.000285682	0.000324215	0.000154065	0.000444072	0.000323123	0	0	0.000246589	0	0.00023912	0.000216427	0.000835335	0	0.000210693	0.000403551	0.000105313	0.000243516	0	0.000183902	0.000252042	0.000194537	0	0.000224127	0.00020537	0	0.000206132	0.000282231
BLAST_Y6031_MYCS2 Putative short-chain type dehydrogenase/reductase MSMEG_6031/MSMEI_5872 OS=Mycobacterium smegmatis (strain ATCC 700084 / mc(2)155) GN=MSMEG_6031 PE=1 SV=1_A0R518	0	5.75e-05	6.28e-05	0.000465387	0	0.000182415	0.000141884	0.000145553	0	0.000219744	0.000237756	0.000242919	0.000368256	0	0.000185943	0.000136631	0.000394945	0	0.000168805	0.000396511	0	0	0.000342818	0.000162107	0	0.000246706	0.000323123	7.61e-05	0	0.000123294	0	0.0002989	0.000108213	0.000174028	0.000567537	0	0	0.000368596	0.000182637	0	3.07e-05	0.000151225	3.89e-05	0.000381752	0	0.00020537	0.000305045	0.000360732	0.000225785
BLAST_SUSD_BACTN Starch-binding protein SusD OS=Bacteroides thetaiotaomicron (strain ATCC 29148 / DSM 2079 / NCTC 10582 / E50 / VPI-5482) GN=susD PE=1 SV=1_Q8A1G2	0	0	0	0	0	0	0	0	3.51e-05	0	0	0	0	0	0	0	0.000592417	0	0	0.000462596	0	0	0	0	0	0.00222036	0	0	0	0.00168502	0	0	0.00176749	0	0.000630597	0	0	0	0	0	0	0	0	0	0	0	0.000122018	0	0
BLAST_Y623_METJA Putative metallophosphoesterase MJ0623 OS=Methanocaldococcus jannaschii (strain ATCC 43067 / DSM 2661 / JAL-1 / JCM 10045 / NBRC 100440) GN=MJ0623 PE=3 SV=1_Q58040	0.000380373	0.000172612	0.000251351	0.000581734	0.000416609	0.000319227	0.000248297	0.000339624	0.000245674	0.000384552	0.000356633	0.000291503	0.000368256	0.000386673	0.000743771	0.000683153	0.000691153	0.00024667	0.000168805	0.000330426	8.4e-05	0.000111865	0.000228545	0	7.7e-05	0	0	0.00011419	0	8.22e-05	0.000160711	0.00011956	3.61e-05	0.000139222	0.000189179	0	0.000269034	0	0.000243516	0.00012793	0.000122602	0.000151225	7.78e-05	0	0.000336191	5.13e-05	0.000244036	0.000154599	0.000112892
LAP2A_HUMAN Lamina-associated polypeptide 2, isoform alpha OS=Homo sapiens GN=TMPO PE=1 SV=2	9.51e-05	0.000172612	0.000188513	0.000465387	9.26e-05	0.000182415	0.000106413	0.000145553	0.000140385	0.000164808	0.000475511	0.000145751	0.000368256	0.000322227	0.000371885	0.000273261	0.000197472	0.00049334	0.000506415	0.000198255	0.000125955	0.000111865	0.000171409	0.000162107	0.000115549	0.000148024	0.000193874	0.000152253	0.000173936	0.000164393	0.000214282	0.00017934	3.61e-05	0	0.000378358	0.000210693	0.000269034	0.000210626	0.000182637	6.4e-05	3.07e-05	0.000151225	0.00015563	0.000381752	0.000224127	0.000154028	0.000183027	0.000103066	0.000112892
BLAST_CHVE_AGRFC Multiple sugar-binding periplasmic receptor ChvE OS=Agrobacterium fabrum (strain C58 / ATCC 33970) GN=chvE PE=1 SV=2_P25548	0	5.75e-05	0.000502702	0.00034904	4.63e-05	0.000136811	0	0.000194071	0.000631734	0.000439488	0	0.000485838	0.00046032	0	0	0	0.000789889	0	0.000168805	0.000462596	0	0.000111865	0	0.000283688	0	0.000937485	0	0	0	0.000369883	0	0	0	0.00087014	0	0	0.000538068	0	0.000791428	0	0.000122602	0.000100817	7.78e-05	0	0	0	0.000732109	0.000103066	0.000338677
BLAST_LTRB_LACLC Group II intron-interrupted relaxase LtrB OS=Lactococcus lactis subsp. cremoris GN=ltrBE1 PE=3 SV=2_Q48722	0.000190186	0.00023015	0.000251351	0.00034904	0.00013887	0.000136811	0.000141884	0.000145553	0.000140385	0.000219744	0.000118878	0.000242919	0.000184128	0.000193336	0.000743771	0.000273261	0.000493681	0.000123335	0.000506415	0.000330426	0	0	0.000399954	0.000121581	0.000192582	0.000246706	0.000193874	0.00011419	0.00021742	0.000246589	0	0.00017934	0.000216427	0.000208834	0.000252239	0.000158019	0.000134517	0.00015797	0.000243516	0.000159913	3.07e-05	0.000252042	7.78e-05	0	0.000280159	0.000102685	0.000305045	0.000257666	0.000225785
LEU1_STAAT 2-isopropylmalate synthase OS=Staphylococcus aureus (strain USA300 / TCH1516) GN=leuA PE=3 SV=1	0.000190186	0.000172612	0.000251351	0.00034904	0.00013887	0.000136811	0.000141884	0.000145553	0.000140385	0.000219744	0.000118878	0.000242919	0.000184128	0.000193336	0.000743771	0.000273261	0.000296209	0.00024667	0.000675219	0.000330426	0	3.73e-05	0.000399954	0.000121581	0.000192582	0.000246706	0.000193874	0.000152253	0.00021742	0.000246589	0	0.00017934	0.000216427	0.000208834	0.000252239	0.000158019	0.000134517	0.00015797	0.000243516	0.000159913	6.13e-05	0.000252042	7.78e-05	0	0.000280159	0.000102685	0.000305045	0.000257666	0.000225785
ASP_THECC 21 kDa seed protein OS=Theobroma cacao GN=ASP PE=2 SV=1	0	0	0.000377027	0	0.000185159	0	0.000177355	0	0	0	0.000237756	0	0	0	0.000371885	0	0	0	0	0	0.000293895	0	0.000399954	0	0	0	0	0	0	0	0.000482134	0	0	0	0.000882835	0	0	0.000315939	0	0	0	0.000705716	0.00015563	0	0	0.000308056	0	0	0.000225785
Metagenome unknown	9.51e-05	0	0	0	0	0	0	0	0	0	0	0	0	0	0	0	0	0	0	0	0.00146948	0	0	0	0	0	0	0.0011419	0.00195678	0	0	0	0	0	0	0	0	0	0	0.00115137	0	0	0	0	0.000392223	0	0	0	0
Metagenome unknown	0.000570559	0	0	0	4.63e-05	0	0.000212826	0	0.000315867	5.49e-05	0.000118878	0	0	0.000386673	0	0.000546523	0	0	0	6.61e-05	0.00033588	0	0.000342818	0.000283688	0.000346647	0	0.000581621	0.000190317	0.00021742	0.000369883	0.00107141	0.00047824	0.000252498	0	0	0.000158019	0	0.00015797	0	9.59e-05	0	0	0	0.000381752	0.000112064	0	0	0.000360732	0.000564462
Metagenome unknown	0	0	0	0	0	0	0	0	0	0	0	0	0	0	0	0	0	0	0	6.61e-05	0.00025191	3.73e-05	0.000514227	0.0010537	0.000308131	4.93e-05	0.000258498	0.00045676	0.000347871	0.000739767	0	5.98e-05	0.000288569	0	0.000126119	0.000105346	0	0.000947817	0	0.000191896	0	0	0	0	0	0	0	0.000103066	0
BLAST_RL7_BIFAA 50S ribosomal protein L7/L12 OS=Bifidobacterium adolescentis (strain ATCC 15703 / DSM 20083 / NCTC 11814 / E194a) GN=rplL PE=3 SV=1_A1A033	0.00014264	0.000460299	0.000502702	0.00069808	0.000879507	0.000273623	0.00145431	0.000194071	0.000456252	0.000219744	0	0	0.000828577	0.000451118	0	0	0	0	0	0.00013217	0	0	0.000971318	0	0	0.00039473	0.000516996	0.00022838	0	0	0.000535705	0.00011956	0.000252498	0.000243639	0.000378358	0	0	0.000315939	0.000487033	0	0	0	0	0	0	0	0.000366055	0	0
PUMA_PARUN 227 kDa spindle- and centromere-associated protein OS=Parascaris univalens GN=PUMA1 PE=2 SV=1	0.00028528	0.000115075	0	0.00104712	0.000231449	4.56e-05	0.000212826	0.000145553	0	0.000109872	0	0.000145751	0.00101271	0.000644454	0.000185943	0	0.000197472	0	0	6.61e-05	0	3.73e-05	5.71e-05	4.05e-05	0.000346647	0	0.000581621	0.000190317	0.00021742	0.000205491	0.000214282	0.0002989	0.000180356	3.48e-05	0.000315298	0.000421385	0.000134517	0.000473909	0.000304395	0.000223878	0	0.000151225	0	0.000381752	0.000112064	0	0.000427064	0	0.000282231
Metagenome unknown	0.000190186	0.000172612	0.000188513	0.000232693	9.26e-05	0.000182415	0.000141884	9.7e-05	7.02e-05	0.000164808	0.000237756	0.000145751	0	0.000193336	0.000185943	0.000409892	0	0.000370005	0.000168805	0.00026434	0.00033588	0.000186442	0.000342818	0.000121581	0.000192582	4.93e-05	0.000258498	0.000190317	0.00021742	0.000246589	0.000214282	5.98e-05	0.000180356	0	0.000315298	0.000210693	0.000134517	0.00015797	0.000121758	0.000191896	9.2e-05	0.000151225	0.000194537	0.000572628	0.000224127	0.000154028	6.1e-05	0.000154599	0.000338677
BLAST_GALE_DICDI UDP-glucose 4-epimerase OS=Dictyostelium discoideum GN=galE PE=1 SV=1_Q553X7	0	0.000115075	6.28e-05	0.000116347	0	0.000273623	7.09e-05	0.000145553	7.02e-05	0	0	9.72e-05	9.21e-05	0	0	0	0	0.00049334	0	0.00026434	0	0.000261019	0.000342818	0.000405268	0.000385164	0	0.000129249	0	0	0.000246589	0	0.00011956	0.000216427	0.000452473	0	0	0	0	0.000426154	0	0.00107276	0.000252042	0.00132285	0	0	0.000770139	0.000488073	0.00082453	0.000451569
BLAST_KPYK_CORGL Pyruvate kinase OS=Corynebacterium glutamicum (strain ATCC 13032 / DSM 20300 / JCM 1318 / LMG 3730 / NCIMB 10025) GN=pyk PE=1 SV=1_Q46078	0	0.00109321	0.000251351	0.000232693	0.000185159	0.000866472	0.00102866	0.000194071	0.00105289	0.00027468	0	0	0.000920641	0.000644454	0	0	0	0	0	0.000594766	0	0	0.000685636	0	0	0.000197365	0.000646245	0.00011419	0	0	0	5.98e-05	0.000432854	0	0.000819776	0	0	0.000105313	0	0	0	5.04e-05	0	0	0	0	0.000183027	0	0
BLAST_RPOC_LACP7 DNA-directed RNA polymerase subunit beta OS=Lachnoclostridium phytofermentans (strain ATCC 700394 / DSM 18823 / ISDg) GN=rpoC PE=3 SV=1_A9KJL3	0.00028528	0.000287687	0	0.000116347	0.000277739	0.000410434	3.55e-05	0.000533696	0.000280771	0.000439488	0	0.000291503	0.000368256	0.000193336	0	0.000546523	0.000592417	0.00049334	0	0.000330426	0	0.000111865	0.000285682	0	0	0.000493413	0	0	0	0	0	0	0	0.000174028	0.000567537	0.000105346	0	0	0	3.2e-05	0.000245203	0.00030245	0	0.000190876	0	0.000256713	0.000427064	0.000360732	0
BLAST_CRH_BACHD HPr-like protein Crh OS=Bacillus halodurans (strain ATCC BAA-125 / DSM 18197 / FERM 7344 / JCM 9153 / C-125) GN=crh PE=3 SV=1_Q9K708	9.51e-05	0.000287687	0.000502702	0	0	0.000456038	0.000141884	0.000339624	0.000280771	0.000109872	0	9.72e-05	0.000368256	0	0	0.000136631	0.000493681	0	0.00033761	0	0	0.000186442	0	0	0	0.000444072	0.000193874	0	0	0	0	0.0005978	0	0.000208834	0.000567537	0	0	0.000210626	0.000121758	0	0.000245203	0.000100817	0.000427982	0	0.000112064	0.00020537	0.000427064	0.000515331	0.000112892
BLAST_KORA_MYCTU 2-oxoglutarate oxidoreductase subunit KorA OS=Mycobacterium tuberculosis (strain ATCC 25618 / H37Rv) GN=korA PE=1 SV=3_O53182	0	0.000172612	0.000251351	0	0	0	0	0.000145553	3.51e-05	5.49e-05	0	0.000194335	0	0	0	0	9.87e-05	0	0	0.000198255	0	0	0.000571363	0	0.00100143	0.000296048	0.000258498	0	8.7e-05	0.000986355	0	0.00023912	0.000504996	0.000696112	0	0.000316039	0	0	0.000121758	0.000319826	0	0.00110898	0	0	0.000224127	0.000154028	0.000610091	0.000154599	0.0007338
Metagenome unknown	0	0	0	0	0	0	0	0	0	0	0	0	0	0	0	0	0	0	0	0	0	0.00119323	0	0	0	0	6.46e-05	0	0	0	0	0	0	0	0	0.000421385	0.0055152	0	0	0	0	0.00347817	0	0	0.0010646	0	0	0	0
TNNC2_MOUSE Troponin C, skeletal muscle OS=Mus musculus GN=Tnnc2 PE=1 SV=2	0	0.000115075	0.00169662	0.000116347	0	0.000136811	0	0	0.000140385	0	0	0	9.21e-05	0.000128891	0	0	0	0	0	0	0	7.46e-05	0	0	0	0.000444072	0.000581621	0.000266443	0.000347871	8.22e-05	0.000267852	0	0	0	0	0	0.000672585	0.000842504	0	0	0.000245203	0	0	0	0.000392223	0.00020537	0.000122018	0.000257666	0
Metagenome unknown	0	0.000345224	0.000628378	0	4.63e-05	0.00036483	0.000248297	0.000339624	0.000245674	0.000384552	0	0.000242919	0.000644449	0.000193336	0	0	0.000197472	0	0.00033761	0.000198255	0	0.000298307	0	0.000243161	0	0.000197365	0.000193874	0	0	0	0	0.00047824	0.000108213	0.000174028	0.000441418	0	0	0.000368596	0.000487033	0	0.000275854	0.000100817	0.00031126	0	0.000280159	0.000359398	0.000305045	0.000309199	0.000225785
Metagenome unknown	0.000427919	0.000517837	0.000125676	0	0.000555478	4.56e-05	0.000212826	0	0.000140385	0.000109872	0	0.000631589	0.000276192	0.000515564	0	0.000136631	0.0010861	0.000123335	0.00033761	0.00013217	0	0	0.000685636	8.11e-05	0	0.000444072	0	7.61e-05	0	0.000246589	0	0	0.000288569	0.000522084	0.000252239	0	0	0.000105313	0	0	0.000122602	5.04e-05	0	0	0.000224127	0	0.000122018	0.000206132	0
BLAST_LSTP_STASI Lysostaphin OS=Staphylococcus simulans GN=lss PE=1 SV=2_P10547	0.000237733	0.00023015	0.000251351	0.00034904	0.000185159	0.000136811	0.000177355	0.000145553	0.000105289	0.000219744	0.000237756	0.000145751	0	0.000128891	0.000185943	0.000409892	9.87e-05	0.00024667	0	0.00026434	0.000293895	0.000111865	0.000285682	4.05e-05	7.7e-05	0.000148024	0.000258498	0.000266443	0.00021742	0.000123294	0.000214282	0.00011956	0.000144285	0	0.000252239	0.000210693	0.000403551	0.000105313	0.000182637	0.00012793	9.2e-05	0.000201633	0.000194537	0.000190876	0.000224127	0.000256713	0.000122018	0.000154599	0.000451569
Metagenome unknown	0.00114112	0	0	0	0.00564736	0.000228019	0.000248297	0	0	0	0	0.000242919	0	0.000257782	0	0	0	0	0	0	0	0	0	0	0	0.000493413	0	0	0	0.000369883	0	0	0	0	0	0	0	0	0.000426154	0	0	0	0.000233445	0	0	0	0	0	0
BLAST_PRO20_ORYSJ Prolamin PPROL 14P OS=Oryza sativa subsp. japonica GN=PROLM20 PE=2 SV=1_Q42465	0	0	0	0	9.26e-05	0	0	9.7e-05	0	0	0	0.00038867	0.000368256	0	0	0	0	0.00024667	0	0	0	0.00134238	0	0	0	0.000444072	0	0	0.00265252	0.000328785	0	0	0.00100999	0.001253	0	0	0.00215227	0.00015797	0	0	0	0.000554491	0.000583612	0	0	0.000462083	0.000366055	0	0.000903138
BLAST_RS4_BACV8 30S ribosomal protein S4 OS=Bacteroides vulgatus (strain ATCC 8482 / DSM 1447 / JCM 5826 / NBRC 14291 / NCTC 11154) GN=rpsD PE=3 SV=1_A6KYH1	0	0.00023015	0	0	9.26e-05	0.000592849	0.000638479	0	0	0	0	9.72e-05	0	0	0	0.000273261	0	0.00185002	0	0	0	0.00115594	0.000342818	8.11e-05	0.000115549	0.000246706	0	0	0	0	0	0	0	0.000208834	0	0	0.00107614	0	0	0.000511722	0.000459756	0.000100817	0.00101159	0	0.000392223	0.000616111	0.0006711	0	0.000225785
BLAST_PA2GA_HUMAN Phospholipase A2, membrane associated OS=Homo sapiens GN=PLA2G2A PE=1 SV=2_P14555	9.51e-05	0.000575374	0	0	0.000231449	4.56e-05	0.000106413	9.7e-05	0	0	0	4.86e-05	0	0	0.000185943	0	0.000197472	0.00049334	0.00135044	0	0.000377865	0.000261019	0	0.000243161	0.00084736	0.000246706	0	0.000418697	8.7e-05	0	0	0	0.000288569	0.000487279	0	0	0	0	0	3.2e-05	0.000122602	0	0.00015563	0.000190876	0.000112064	0.000359398	0	0.000206132	0
Metagenome unknown	0	0	0	0	0	0	0.00198638	0	3.51e-05	0	0	0	0	0.00367339	0	0	0	0	0	0	0	0.000261019	0	0	0	0	0	0	0	0	0	0	0	0	0	0	0	0	0	0	0	0	0	0	0	0	0	0	0
Metagenome unknown	0.000380373	0	0	0	0.000648058	0	0.000141884	0	0	0	0	0	0	0.000257782	0	0	0	0	0	0	0.000923671	0.00022373	0	0	0	0	0.000646245	0.000190317	0.00104361	0	0.00107141	0	0.00270534	0	0	0.000316039	0	0	0	0.00012793	0	0	0	0.000381752	0.000224127	0	0	0	0
BLAST_G3P_LACDE Glyceraldehyde-3-phosphate dehydrogenase OS=Lactobacillus delbrueckii subsp. bulgaricus GN=gap PE=3 SV=1_O32755	0	0	0	0	0	0	0	9.7e-05	0	0.00181289	0	0	0	0	0	0	0	0	0	0.000198255	0	0	0	0	0	0	0	0.000190317	0	0	0	0	0	0	0	0	0	0	0	0.0016631	3.07e-05	0	0	0	0	0.000102685	0	0	0.000112892
BLAST_ARGD_BACAM Acetylornithine aminotransferase (Fragment) OS=Bacillus amyloliquefaciens GN=argD PE=3 SV=1_Q9ZJ10	0.000380373	0.000172612	0	0	0.000185159	0	0.000248297	0	0	0	0	0.000485838	0	6.44e-05	0	0	0	0.00024667	0	6.61e-05	0	0	0	0.000162107	0.000924392	0.000246706	0	0	0	0.00238369	0	0.00047824	0	0	0	0	0	0	0.000487033	0	0.000122602	0.000806533	0.000350167	0	0	0.000308056	0.000122018	0	0.00135471
Metagenome unknown	0	0	0	0	0	0	0	0	0	0	0	0	0	0	0	0	0	0	0	0	0	0	0	0	0	4.93e-05	0	0.00688946	0	0	0	0	0	0	0	0	0	0	0	0	0	0	0	0	0	0	0	0	0.00259652
TOP2_PICGU DNA topoisomerase 2 OS=Meyerozyma guilliermondii (strain ATCC 6260 / CBS 566 / DSM 6381 / JCM 1539 / NBRC 10279 / NRRL Y-324) GN=TOP2 PE=3 SV=3	0.000190186	0.000287687	0.000251351	0	0.000185159	0.000182415	0.000177355	0.000194071	0.000210578	0.000164808	0.000475511	0.000194335	0	0.000257782	0.000371885	0.000409892	0.000296209	0.00024667	0.000675219	0.000198255	0.000125955	0.000149154	0	0.000162107	0.000154065	0.000148024	0.000258498	0.000152253	0.00021742	0.000123294	0.000267852	0	0.000144285	0	0	0.000210693	0.000134517	0	0.000304395	0.000159913	6.13e-05	0.000201633	0.000194537	0.000190876	0	0.00020537	6.1e-05	0.000154599	0.000395123
BLAST_YHFE_BACSU Putative aminopeptidase YhfE OS=Bacillus subtilis (strain 168) GN=yhfE PE=3 SV=1_O07603	0.000190186	0.000287687	0.000188513	0	0.000231449	0.000182415	0.000141884	0.000194071	0.000210578	0.000164808	0.000475511	0.000194335	0	0.000322227	0.000557828	0.000409892	0.000296209	0.000370005	0.000675219	6.61e-05	0.00016794	0.000149154	0	0.000121581	0.000115549	0.000148024	0.000193874	0.000152253	0.000130452	0.000123294	0.000267852	0	0.000144285	3.48e-05	0	0.000158019	0.000269034	0	0.000304395	0.00012793	3.07e-05	0.000252042	0.000194537	0.000381752	0	0.00020537	6.1e-05	0.000206132	0.000338677
SPI2_SOLTU Serine protease inhibitor 2 OS=Solanum tuberosum PE=1 SV=1	0	0.000172612	0.000377027	0.000465387	0.00013887	4.56e-05	0.000248297	0	0.000210578	0	0	0.000145751	0.000276192	6.44e-05	0	0	9.87e-05	0.000123335	0	0.000330426	8.4e-05	0.000111865	0	0	0	0	6.46e-05	0	0	0.000123294	0	0	0	0	0.000504477	0	0	0	0	0	0	0.000756125	0.00101159	0	0	0	0.000366055	0.000154599	0
BLAST_G1091_AKKM8 Glycosyl hydrolase family 109 protein 1 OS=Akkermansia muciniphila (strain ATCC BAA-835 / Muc) GN=Amuc_0017 PE=3 SV=1_B2UL75	0	0	0	0	0	0	0	0.000145553	0	0	0	0.000583005	0	0	0	0	0	0	0	0	0	0	0.0006285	0	0.00219543	0.000197365	0	0	0	0.000739767	0	0.00047824	0	0.000174028	0	0	0.000403551	0	0	0.00102344	0	0.00166347	0.000272352	0	0.000112064	0.000102685	0.000427064	0	0.000112892
BLAST_ALF1_CHLPN Probable fructose-bisphosphate aldolase class 1 OS=Chlamydia pneumoniae GN=fbaB PE=3 SV=1_Q9Z8Q7	0	0.000172612	0	0	0.000601768	0	0	0.000291107	0	0	0.000475511	0.00038867	0	0	0.000929714	0	0.000691153	0.000123335	0	0.00013217	0	0.000633903	0	0.000121581	0.000616262	0	6.46e-05	0.000723203	8.7e-05	0.000410981	0	0.00047824	0.000108213	0	0	0.000895444	0	0	0	0	0	0.000252042	0	0	0	0	0.000610091	0	0
Metagenome unknown	0	0	0	0	0	0	0	0	7.02e-05	0	0	0	0	0	0	0	0	0	0	0.00482421	0	0	0	0	0	4.93e-05	0	0	0	0	0	0	0	0	0	0	0	0	0.00487033	0	0	0	0	0	0	0	0	0	0
Metagenome unknown	0.000190186	0.000115075	6.28e-05	0.000465387	0.000324029	9.12e-05	7.09e-05	9.7e-05	0	0.000109872	0.000356633	0.000145751	0.000368256	6.44e-05	0.000185943	0	0.000296209	0	0.000168805	0	0.000839701	7.46e-05	5.71e-05	0.000121581	0.000269614	0.000148024	0.000387747	0.00022838	0.000260904	4.11e-05	0	0.0002989	0.000288569	3.48e-05	0.000189179	0.000316039	0.000134517	0.00015797	0.000121758	0.000287843	0.000122602	5.04e-05	0.000116722	0.000381752	5.6e-05	0.000154028	0.000122018	0	0.000112892
BLAST_BGLS_RUMAL Beta-glucosidase OS=Ruminococcus albus PE=3 SV=1_P15885	0.000237733	5.75e-05	0.000188513	0.000814427	0.000185159	0.000136811	0.000141884	0.000145553	0	0	0.000237756	0.000145751	0.00110477	0.000644454	0.000185943	0	9.87e-05	0	0.000168805	6.61e-05	0	0	5.71e-05	4.05e-05	0.000346647	0	0.000387747	0.000152253	0.00021742	0.000205491	0.000214282	0.0002989	0	3.48e-05	0.000252239	0.000210693	0.000269034	0.000315939	0.000304395	0.000223878	0	0.000201633	0	0.00114526	0.000168095	0	0.000427064	5.15e-05	0.000225785
BLAST_PDUC_SALTY Propanediol dehydratase large subunit OS=Salmonella typhimurium (strain LT2 / SGSC1412 / ATCC 700720) GN=pduC PE=1 SV=3_P37450	0.000570559	0.000517837	0	0.00116347	0.000231449	9.12e-05	0.000496595	0.000145553	0	0	0.000118878	0	0.000828577	0.000386673	0	0.000819784	0	0	0.000168805	0	0	0	0	4.05e-05	0	0	0	0	0	0	0	0	0.00100999	0	0.000252239	0	0	0.000684535	0.00127846	0	0	0.000151225	0	0	0	0	0	0	0
Metagenome unknown	0	0	0.0051527	0	0	0	0	0	0	0	0	0.000874508	0	0	0	0	0	0	0	0.00112345	0	0	0	0	0	0.000246706	0	0	0	0	0	0	0	0	0	0	0	0	0	0	0.00260528	0	0	0	0	0	0	0.00159753	0
BLAST_GPMI_BACV8 2,3-bisphosphoglycerate-independent phosphoglycerate mutase OS=Bacteroides vulgatus (strain ATCC 8482 / DSM 1447 / JCM 5826 / NBRC 14291 / NCTC 11154) GN=gpmI PE=3 SV=1_A6L050	0	0	0.000314189	0	0	0.000410434	0.000177355	0	7.02e-05	0	0	0	0	0	0.000185943	0	9.87e-05	0.00049334	0	0	0	0.00104407	0.000228545	8.11e-05	0.000539229	4.93e-05	6.46e-05	7.61e-05	0	8.22e-05	5.36e-05	0.00023912	0.000216427	0.00087014	0.000378358	0.000158019	0	5.27e-05	0.000182637	0.000159913	0.00171642	0.000100817	0.000700335	0	0	0.000102685	0.000305045	5.15e-05	0.000620908
BLAST_RL17_EUBE2 50S ribosomal protein L17 OS=Eubacterium eligens (strain ATCC 27750 / VPI C15-48) GN=rplQ PE=3 SV=1_C4Z2V8	0.00014264	0.00023015	0	0.00104712	0.00013887	4.56e-05	7.09e-05	4.85e-05	0	0.000164808	0.000356633	0.000437254	0.00046032	0.000193336	0	0	0	0	0	0	0	0	0.000285682	0	0.000346647	0.000148024	0.000258498	0.00022838	0	8.22e-05	0.000214282	0.00035868	0	6.96e-05	0.000378358	0.000316039	0	0.000421252	0	0.000223878	0	0	3.89e-05	0	0	0.000102685	0.000244036	0.000309199	0
Metagenome unknown	0.00014264	0.00023015	0.000251351	0.000581734	4.63e-05	9.12e-05	0.000177355	0.000194071	0.000105289	0.00027468	0.000594389	0.000194335	0.000276192	0.000322227	0	0.000409892	0.000394945	0.000370005	0.00033761	0.00026434	0	7.46e-05	0.000114273	4.05e-05	7.7e-05	0.000197365	0.000258498	0.00011419	4.35e-05	8.22e-05	0	0.00023912	0.000108213	0.000104417	0.000252239	0.000210693	0	0.000263283	0.000243516	0.00012793	0.000122602	0.000100817	0.00015563	0.000190876	0.000112064	0.00020537	0.000122018	0.000206132	0
Metagenome unknown	0	0.0018412	0	0	0.000231449	0.0023714	3.55e-05	0.00116443	0.000140385	0.0013734	0	0	0.00248573	0	0	0	0	0	0	0	0	0	0	0.000202634	0	0	0	0	0	0	0	0	0	0	0	0	0	0	0	0	0	0	3.89e-05	0	0	0.000102685	0	0	0
Metagenome unknown	9.51e-05	0.00023015	0.00056554	0	0	0.000547246	0.000141884	0.000291107	0.000421156	0.00159314	0.000118878	0.000242919	0.00147302	6.44e-05	0.00334697	0.000136631	0.000592417	0.00024667	0.000506415	0	0	0	0	0.000162107	0	0.000148024	0.000193874	0	0	0	0.000214282	0	0	0	0	0	0	0	0	0	0	0	7.78e-05	0.000381752	0	0.000513426	0	0	0.000169338
BLAST_TRPE_BACCA Anthranilate synthase component 1 OS=Bacillus caldotenax GN=trpE PE=3 SV=1_P30526	0.00028528	0.00023015	0	0.000581734	0.000324029	0.000182415	0	0.000291107	0	0	0	0	9.21e-05	0	0	0	0	0	0	0.00013217	0.00033588	0	0.000285682	0	0.000269614	4.93e-05	0.000258498	0.000266443	0.000347871	0.000164393	0.000321423	0.00041846	0.000216427	0.000243639	0.000252239	0.000210693	0	5.27e-05	0.000365275	0.000191896	0.000183902	0.000453675	0.000233445	0	0.000280159	0.000256713	0.000305045	0	0.000338677
BLAST_PUR4_IDILO Phosphoribosylformylglycinamidine synthase OS=Idiomarina loihiensis (strain ATCC BAA-735 / DSM 15497 / L2-TR) GN=purL PE=3 SV=1_Q5QWY0	0.00028528	0.000402762	0.000314189	0	0.000231449	0.000410434	0.00102866	9.7e-05	0.000175482	0.000384552	0.000237756	0.000534422	9.21e-05	0.000515564	0	0	9.87e-05	0.000123335	0	0	0	0.00104407	5.71e-05	0.000121581	0.000462196	0	0	0	4.35e-05	4.11e-05	0.000482134	0	0	0.00031325	0	5.27e-05	0	0	0	0.000223878	0.00122602	0	0.00108941	0	0	0.000513426	0	0.000979129	0
Metagenome unknown	0.000237733	0.000172612	6.28e-05	0.000465387	4.63e-05	9.12e-05	3.55e-05	9.7e-05	3.51e-05	5.49e-05	0	9.72e-05	9.21e-05	0	0	0.000136631	9.87e-05	0	0.00033761	6.61e-05	0.000125955	7.46e-05	0.000114273	0.000445795	0.000192582	9.87e-05	0.000516996	0.00022838	0.00021742	0.000123294	0.000107141	0.00041846	0.000180356	6.96e-05	0.000315298	0.000158019	0	0.000263283	0.000243516	6.4e-05	3.07e-05	0.000151225	7.78e-05	0	0.000112064	0.000102685	0	0.000103066	0.000225785
SYG_AGARV Glycine--tRNA ligase OS=Agathobacter rectalis (strain ATCC 33656 / DSM 3377 / JCM 17463 / KCTC 5835 / VPI 0990) GN=glyQS PE=3 SV=1	0.000237733	0.000345224	0.000125676	0	0	0.000319227	3.55e-05	0.000145553	0.00066683	0.000439488	0	0.000242919	9.21e-05	0.000128891	0.000557828	0	0.000592417	0.00049334	0.000675219	0	0	7.46e-05	0	8.11e-05	0	0.000296048	0.000193874	0	0	0	0.000107141	0	7.21e-05	0.000243639	0	0	0.000134517	0	0	0.00012793	0.000398455	0	7.78e-05	0.000190876	0.000112064	0.000359398	0.000122018	0.000566864	0
BLAST_RL4_EUBE2 50S ribosomal protein L4 OS=Eubacterium eligens (strain ATCC 27750 / VPI C15-48) GN=rplD PE=3 SV=1_C4Z2T1	0.000190186	0.000690449	0.000502702	0.000232693	4.63e-05	0.000820868	0.000283768	0.000582213	0.000737023	0.000384552	0	0.000340086	0.000184128	0.000580009	0	0.000136631	0.000987362	0.000370005	0	0	0	0	0	8.11e-05	0	0.000246706	0	0	0	0	0	0.00071736	0	0.000591695	0.000315298	0	0	0.000315939	0	0	0.000306504	0	7.78e-05	0	0.000168095	5.13e-05	0.000488073	0.000154599	0
Y1235_THEP1 UPF0758 protein Tpet_1235 OS=Thermotoga petrophila (strain RKU-1 / ATCC BAA-488 / DSM 13995) GN=Tpet_1235 PE=3 SV=1	0	0	0	0	0	0	0	0	0	5.49e-05	0	0	0	0	0	0	0	0	0	0.000462596	0.0011336	0	0.000342818	8.11e-05	0.000385164	0	0.000323123	0.000418697	4.35e-05	4.11e-05	0	0.0005978	0.000216427	0	6.31e-05	0.000790097	0	0.000105313	0	0.000607669	0	0	0.000116722	0	0.000280159	5.13e-05	0	0.000103066	0.000169338
Metagenome unknown	0	0	0	0	0	0	0	0	0	0	0	0	0	0	0	0	0	0	0	0.00158604	0	0	0.00199977	0	0	0	0.000387747	0	0	0	0	0	0	0	0	0	0	0	0	0	0	0	0	0	0	0	0	0	0
BLAST_DPO4_CLOTH DNA polymerase IV OS=Clostridium thermocellum (strain ATCC 27405 / DSM 1237 / NBRC 103400 / NCIMB 10682 / NRRL B-4536 / VPI 7372) GN=dinB PE=3 SV=1_A3DH61	0.000237733	5.75e-05	0.000125676	0	0.00013887	9.12e-05	0.000106413	0	0	0.000109872	0.000475511	0.000145751	0	0	0.000929714	0	0	0	0.000675219	6.61e-05	8.4e-05	0	0	0	0	0	0.000258498	0.00117996	0.00104361	0	0.000160711	0.00035868	7.21e-05	0	0.000126119	0.000210693	0	0.000421252	0.000547912	0.000671635	3.07e-05	0.000151225	3.89e-05	0.000381752	5.6e-05	0	0.000183027	0	0
BLAST_RS8_CARHZ 30S ribosomal protein S8 OS=Carboxydothermus hydrogenoformans (strain ATCC BAA-161 / DSM 6008 / Z-2901) GN=rpsH PE=3 SV=1_Q3A9T0	0.00028528	0.000172612	6.28e-05	0.000465387	0.000185159	9.12e-05	0.000106413	4.85e-05	0.000105289	5.49e-05	0.000237756	0.000145751	0.000276192	6.44e-05	0.000185943	0.000273261	9.87e-05	0	0.000168805	0.000198255	4.2e-05	7.46e-05	0.000685636	8.11e-05	0.000346647	0.00039473	0.000258498	0.000266443	0.00021742	0.000205491	0	0	0.000216427	3.48e-05	0.000315298	5.27e-05	0	0.000263283	0	0	0.000183902	0	0.000116722	0	0.000448255	0.00020537	0	0.000154599	0
BLAST_RL21_BACV8 50S ribosomal protein L21 OS=Bacteroides vulgatus (strain ATCC 8482 / DSM 1447 / JCM 5826 / NBRC 14291 / NCTC 11154) GN=rplU PE=3 SV=1_A6L6D1	0	0.00023015	0	0	0	0	0	0	7.02e-05	0	0	0	0	0	0.000743771	0.00109304	0.000197472	0.000123335	0.000844024	0	0	0	0.000228545	8.11e-05	0.000308131	9.87e-05	0.000387747	0.000304507	0.000913163	0	0	0	0.000504996	0.000417667	0	0.000790097	0.000269034	0	0	0.000671635	6.13e-05	0	7.78e-05	0	0.000448255	0	0.000305045	0.000103066	0.000112892
RL7_BIFLS 50S ribosomal protein L7/L12 OS=Bifidobacterium longum subsp. infantis (strain ATCC 15697 / DSM 20088 / JCM 1222 / NCTC 11817 / S12) GN=rplL PE=3 SV=1	0.00014264	0.000402762	0.000879729	0.00069808	0.00101838	0.000319227	0.00106413	0.000194071	0.000526445	0.00027468	0	0	0.000644449	0.000451118	0	0	0	0	0	0.00013217	0	0	0.000457091	0	0	0.00039473	0.000516996	0.00022838	0	0	0.000535705	0.00011956	0.000396782	0.00031325	0.000378358	0	0	0.000315939	0	0	0	0	0	0	0	0	0.000366055	0	0
BLAST_SPZ1B_WHEAT Serpin-Z1B OS=Triticum aestivum PE=1 SV=1_P93693	0	0	0	0	0	9.12e-05	0.000283768	0	0.000210578	0.000109872	0	0	0	0.000193336	0	0	0	0.00024667	0	6.61e-05	0	7.46e-05	0	0	0	0.000296048	0.000258498	0	0	8.22e-05	0.000374993	0.00023912	0	0	0	0	0	0.000210626	0	0	0.000613008	0	0.000116722	0	0.000504286	0.000154028	6.1e-05	0.000772997	0.000112892
Metagenome unknown	0	0	0	0	0	0	0	0	0	0	0	0	0	0.00116002	0	0	0	0	0	0	0	0	0	0	0	0	0	0	0	0	0	0.00071736	0	0	0	0	0	0	0.00170462	0	0	0	0	0	0	0	0	0	0
YIDC_WIGBR Membrane protein insertase YidC OS=Wigglesworthia glossinidia brevipalpis GN=yidC PE=3 SV=1	0.00014264	5.75e-05	0	0.00034904	0.000231449	9.12e-05	0.000106413	0.000145553	7.02e-05	0.000109872	0.000356633	0.000145751	0.000276192	0.000128891	0	0	0	0.000123335	0	0	0.000293895	3.73e-05	5.71e-05	8.11e-05	0.000154065	4.93e-05	0.000323123	0.00022838	8.7e-05	0.000123294	0.000107141	0.0002989	0.000180356	0.000104417	0.000315298	0.000105346	0.000269034	0.000105313	0.000243516	0.000159913	9.2e-05	0.000100817	0.000116722	0.000190876	0.000168095	0.000154028	0.000244036	0.000103066	0.000169338
BLAST_PGCA_BACSU Phosphoglucomutase OS=Bacillus subtilis (strain 168) GN=pgcA PE=1 SV=3_P18159	0.000475466	0.000517837	0.000314189	0	0	0.000228019	7.09e-05	4.85e-05	0.000175482	5.49e-05	0	9.72e-05	0	0	0	0.000136631	0	0.00024667	0.000168805	0.000198255	0	0.000186442	5.71e-05	0.000121581	0	0.000592096	0	0	0	0.000205491	0	5.98e-05	7.21e-05	0.000348056	0.000252239	0	0	0.000842504	0.000426154	0.000191896	0.000337154	5.04e-05	0.00015563	0	0.000336191	0.000821482	6.1e-05	0.000412265	5.64e-05
BLAST_BGLM_ASPNC Probable beta-glucosidase M OS=Aspergillus niger (strain CBS 513.88 / FGSC A1513) GN=bglM PE=3 SV=1_A5ABF5	9.51e-05	5.75e-05	0	0.000465387	4.63e-05	0	0	0	0	0	0.000237756	0	0.000276192	0	0.000185943	0.000273261	0	0	0.00033761	0	0.000209925	0.000149154	0.000285682	8.11e-05	0.000154065	0	0.000193874	0.000190317	0.000260904	0	0.000107141	0.00011956	0.000180356	3.48e-05	0.000252239	0.000105346	0.000269034	0.000315939	0.000304395	0.000191896	9.2e-05	0.000100817	0.00015563	0.000572628	0.000280159	0.000256713	0.000183027	0.000103066	0.000225785
BLAST_MALE_ENTAE Maltose-binding periplasmic protein OS=Enterobacter aerogenes GN=malE PE=3 SV=1_P18815	0	0	0	0	0	0	0	0	0	0	0	0	0	0	0	0	0	0	0	0	0	0.00134238	0	0	0	0	0	0	0	0	0	0	0	0	0	0.000526732	0.00242131	0.00015797	0	0	0	0.0030245	0	0	0.00156889	0	0	0.000154599	0
BLAST_FUCI_BACV8 L-fucose isomerase OS=Bacteroides vulgatus (strain ATCC 8482 / DSM 1447 / JCM 5826 / NBRC 14291 / NCTC 11154) GN=fucI PE=3 SV=1_A6L048	4.75e-05	0.000115075	0	0.000116347	0	0	0.000141884	0.000339624	0	0	0	0	0	0	0	0	0	0	0.00033761	0	0	7.46e-05	0.000342818	0.000162107	0.000462196	0.000148024	0.000452372	0.000304507	0.000347871	0.000164393	0	0.0005978	0.000216427	0.000591695	0	0.000316039	0	0	0.000182637	0.000671635	0.000919512	0.000100817	0.00112832	0.000190876	0.000280159	0	0.000427064	0.000103066	0.000225785
BLAST_PDUA_SALTY Propanediol utilization protein PduA OS=Salmonella typhimurium (strain LT2 / SGSC1412 / ATCC 700720) GN=pduA PE=1 SV=1_P0A1C7	0	0.000172612	0.000188513	0.00034904	0	0.000136811	0.000106413	0.000145553	0.000105289	0.000109872	0.000594389	0.000145751	0	6.44e-05	0.000185943	0.000273261	0.000394945	0.00024667	0	0.00013217	0	0.000186442	0.000228545	0.000121581	0.000192582	9.87e-05	0.000129249	0	8.7e-05	0.000246589	0	0.00017934	0.000108213	0.000104417	0.000189179	5.27e-05	0.000269034	0.000105313	0	3.2e-05	0.000183902	0.000151225	3.89e-05	0.000763504	0.000112064	0.000256713	6.1e-05	0.000103066	0.000169338
BLAST_AMY1_ECOLI Periplasmic alpha-amylase OS=Escherichia coli (strain K12) GN=malS PE=1 SV=1_P25718	0	0	0.00119392	0	0	0	0	0	0	0	0	0.00126318	0	0	0	0	0	0	0	0.00237906	0	0	0	0	0	0	0	0	0	0	0	0	0	0	0	0	0	0	0	0	0.00260528	0	0	0	0	0	0	0.00128833	0
Metagenome unknown	0.000190186	0.000115075	0	0.000116347	0.00013887	4.56e-05	7.09e-05	4.85e-05	0.000105289	0.000109872	0.000237756	9.72e-05	9.21e-05	0.000322227	0.000371885	0.000273261	0.000197472	0.00024667	0.000506415	0.000330426	0.000125955	0	0.000171409	8.11e-05	0	9.87e-05	6.46e-05	7.61e-05	8.7e-05	8.22e-05	0.000214282	5.98e-05	0.000108213	6.96e-05	0.000126119	0.000105346	0.000134517	0.00015797	0.000182637	0	3.07e-05	0.000100817	7.78e-05	0	0.000224127	0.00020537	0.000122018	0.000154599	5.64e-05
ACTN2_MOUSE Alpha-actinin-2 OS=Mus musculus GN=Actn2 PE=1 SV=2	0	5.75e-05	6.28e-05	0	0	0	0	0	7.02e-05	0	0	0	0	0	0.000557828	0	0	0	0	0	0	0.000149154	0	0.00113475	0	9.87e-05	6.46e-05	0.000152253	0	0.000164393	0.000107141	0.00011956	0	6.96e-05	0	0	0	0.000210626	0	0	0.000551707	0.000100817	3.89e-05	0	0.000672382	0.000616111	0	0.000103066	0
BLAST_ARGC_SYNP2 N-acetyl-gamma-glutamyl-phosphate reductase OS=Synechococcus sp. (strain ATCC 27264 / PCC 7002 / PR-6) GN=argC PE=3 SV=1_B1XIA1	4.75e-05	0.000345224	0	0.000116347	0.000277739	0.000228019	7.09e-05	0.000242589	0.000350963	0.00027468	0	0.000242919	0.00046032	0.000128891	0.000743771	0.000136631	0.000394945	0.00024667	0	0	0	0	5.71e-05	8.11e-05	0	0.000641437	0	0	0	0	0	0.00083692	0	0.000278445	0.000378358	0	0.000134517	0	6.09e-05	0	0.000153252	0.000554491	7.78e-05	0.000190876	0.000168095	5.13e-05	0.000183027	0.000103066	0
Metagenome unknown	9.51e-05	0	0	0.000465387	0.000324029	4.56e-05	7.09e-05	9.7e-05	7.02e-05	0.000164808	0.000237756	0	9.21e-05	0	0	0.000136631	0	0	0.000168805	0.00013217	0.000461836	0.00022373	0.000285682	0.000202634	0.000192582	0	0.000193874	0.00045676	0.000347871	4.11e-05	0.000321423	0.0002989	7.21e-05	3.48e-05	0.000252239	0.000158019	0.000134517	0.000368596	0.000182637	0.000255861	0.000214553	5.04e-05	0.000194537	0	0.000224127	0.000256713	0	0	0.000225785
RL7_SALHS 50S ribosomal protein L7/L12 OS=Salmonella heidelberg (strain SL476) GN=rplL PE=3 SV=1	0	0	0	0	0	0	0	0	0	0	0	0	0	0	0	0	0	0	0.000168805	0	0	0.001939	0	0	0	0	0	0	0	0	0	0	0	0	0	0.000210693	0	0	0	0	0	0.000201633	0	0	0.000112064	0	0	0	0
BLAST_SP3AF_BACSU Stage III sporulation protein AF OS=Bacillus subtilis (strain 168) GN=spoIIIAF PE=4 SV=1_P49783	0	0.000345224	0.00131959	0	0	0	0	0	0	0	0	0	0	0	0	0	0	0.00074001	0	0	0	0.000149154	0	0.000121581	0	0	0	0	0	0	0	0	0.000108213	0	0.000126119	0	0	0.0044758	0.000182637	0	0	0	0	0	0.000336191	0.00287519	0	0.000257666	0
BLAST_AB29B_ARATH ABC transporter B family member 29, chloroplastic OS=Arabidopsis thaliana GN=ABCB29 PE=1 SV=1_Q9LZB8	0.000427919	0.00023015	0.000251351	0	0.000555478	0.000228019	0.000177355	0.000145553	3.51e-05	0.000219744	0.000237756	0.000291503	0	0.000193336	0.000185943	0.000409892	0	0	0.00033761	6.61e-05	0.00125955	0	0	0	0.000346647	4.93e-05	0.000193874	0.000190317	0.00130452	0	0.000267852	0	0.000108213	0.000104417	0	0.000210693	0	0	0.000243516	0.000959478	6.13e-05	0	7.78e-05	0	5.6e-05	0.000154028	0	5.15e-05	0
BLAST_MGGB_PETMO Mannosylglucosyl-3-phosphoglycerate phosphatase OS=Petrotoga mobilis (strain DSM 10674 / SJ95) GN=mggB PE=1 SV=1_A9BJC1	0	0	0.00056554	0	0	0.00036483	0.000177355	0.000242589	0.000280771	5.49e-05	0	0	9.21e-05	0	0	0.000409892	0.000197472	0	0	0	0	7.46e-05	0	0.000121581	0	0.000246706	0	0	0	0	0	0.0005978	0	0.00055689	0.000378358	0	0	0	0.000791428	0	0.000214553	0	7.78e-05	0	0	0.000102685	6.1e-05	0.000309199	0.0007338
BLAST_APPY_ECOLI HTH-type transcriptional regulator AppY OS=Escherichia coli (strain K12) GN=appY PE=1 SV=3_P05052	4.75e-05	0	0	0.00034904	0.000277739	9.12e-05	7.09e-05	0.000145553	3.51e-05	0.000164808	0.000237756	9.72e-05	9.21e-05	0	0.000185943	0.000136631	0	0	0.000168805	0.00013217	0.000419851	0.000186442	0.000228545	0.000162107	0.000192582	0	0.000193874	0.00034257	0.000391355	4.11e-05	0.000107141	0.00035868	0.000108213	6.96e-05	0.000252239	0.000105346	0	0.000263283	0.000304395	0.000255861	0.000153252	0	0.00015563	0	0.000280159	0.000308056	0	0	0.000169338
BLAST_HLYA_SERMA Hemolysin OS=Serratia marcescens GN=shlA PE=1 SV=1_P15320	0	0.000345224	0.000628378	0	4.63e-05	0.00036483	0.000248297	0.000339624	0.000210578	0.000329616	0	0.000194335	0.000552384	0.000128891	0	0	0.000197472	0	0.00033761	0.000198255	0	0.000111865	0	0.000243161	0	0.000148024	6.46e-05	0	0	0	0	0.00035868	0.000108213	0.000139222	0.000378358	0	0	0.000315939	0.000487033	0	0.000275854	0.000100817	0.000194537	0	0.000280159	0.000359398	0.000305045	0.000309199	0.000225785
BLAST_PRORY_HUMAN Proline-rich protein, Y-linked OS=Homo sapiens GN=PRORY PE=2 SV=1_Q9H606	0.000237733	0.000172612	6.28e-05	0	0.000231449	4.56e-05	0.000212826	9.7e-05	0.000175482	0.000219744	0.000713267	4.86e-05	0	0.000193336	0.000557828	0.000546523	0.000197472	0	0.000168805	0	0.00025191	0.00022373	0.000342818	8.11e-05	0.000115549	0	0.000387747	0.000266443	0.000260904	4.11e-05	0.000428564	0.00011956	0.000180356	3.48e-05	0	0.000210693	0.000269034	0	0	0.000191896	0	0	0.000233445	0.000572628	0.000336191	0	6.1e-05	0	0.000112892
BLAST_FTSWL_MYCLE Uncharacterized FtsW-like protein OS=Mycobacterium leprae (strain TN) GN=rodA PE=3 SV=2_Q50186	0.00014264	0.00023015	0.000251351	0.000581734	4.63e-05	9.12e-05	0.000177355	0.000194071	0.000105289	0.000164808	0.000594389	0.000194335	0.000276192	0.000322227	0	0.000409892	0.000394945	0.000370005	0.00033761	0.000198255	0	3.73e-05	0.000114273	8.11e-05	7.7e-05	0.000197365	0.000258498	0.00011419	4.35e-05	8.22e-05	0	0.00023912	0.000108213	0.000104417	0.000252239	5.27e-05	0	0.000263283	0.000243516	6.4e-05	0.000122602	0.000100817	7.78e-05	0.000381752	0.000112064	0.00020537	0.000122018	0.000206132	0
BLAST_RL10_CLOPE 50S ribosomal protein L10 OS=Clostridium perfringens (strain 13 / Type A) GN=rplJ PE=3 SV=1_Q8XHR6	0	0.00023015	6.28e-05	0.000465387	0	0	0.000248297	9.7e-05	0.000280771	0	0.000118878	0.000485838	0.000276192	0.000257782	0.000371885	0.000409892	9.87e-05	0.00024667	0.000168805	6.61e-05	0	0	0.000342818	0	0.000115549	4.93e-05	0	0	0	0.000287687	0	0.0002989	7.21e-05	0.00031325	0.000315298	0	0.000134517	0.00015797	0	6.4e-05	0.000245203	0.000201633	0	0	0.000168095	0.00020537	0.000488073	0	0
Metagenome unknown	0	0	0	0	0	0	0	0	0	0	0	0	0	0	0	0.0109305	0	0	0	0.000198255	0	0	0	0	0	0	0	0	0	0	0	0	0	0	0	0	0	0	0.000182637	0	0	0	0	0	0	0	0	0	0
BLAST_NAGH_CLOPE Hyaluronoglucosaminidase OS=Clostridium perfringens (strain 13 / Type A) GN=nagH PE=1 SV=2_P26831	0.000475466	0.000287687	0.000125676	0.000116347	0.000601768	0.000182415	0.000212826	9.7e-05	0.000140385	0.000109872	0.000237756	9.72e-05	0	0.000128891	0.000185943	0.000136631	0	0	0.00033761	0	0.000881686	7.46e-05	0.000799909	0	0.000346647	9.87e-05	6.46e-05	7.61e-05	0.00113058	0	0.000160711	0.00017934	7.21e-05	0.000139222	0	5.27e-05	0	0	0.000243516	0.000831548	9.2e-05	0	0.00015563	0.000381752	0	5.13e-05	0	5.15e-05	0
BLAST_PGK_BACTN Phosphoglycerate kinase OS=Bacteroides thetaiotaomicron (strain ATCC 29148 / DSM 2079 / NCTC 10582 / E50 / VPI-5482) GN=pgk PE=3 SV=1_Q8A753	9.51e-05	5.75e-05	0	0	0	0	0	0.000291107	0.000491349	0	0	0.00116601	0	0	0	0	0.000691153	0	0.000168805	0.000726936	0	0	0.000285682	0.000121581	0.000308131	0.000838802	0	0	0	0.00045208	0	0	0	0.000487279	0.000126119	0	0	0	0.000304395	0	0	0.00030245	0	0	0	0.00020537	0.000122018	0.000257666	0.000508015
BLAST_RL2_LACP7 50S ribosomal protein L2 OS=Lachnoclostridium phytofermentans (strain ATCC 700394 / DSM 18823 / ISDg) GN=rplB PE=3 SV=1_A9KJJ1	0.00128376	0.00023015	0	0.00069808	0.000231449	0.000136811	0	4.85e-05	0.000245674	0.000219744	0.000118878	0.000145751	9.21e-05	0.000966682	0.00111566	0.000683153	0.000296209	0.000123335	0.00033761	0	0	0	0.000228545	0	0.000231098	0.000296048	0	0.000190317	8.7e-05	4.11e-05	0.000214282	5.98e-05	0	0	0.000126119	0.000210693	0	0	0	0.000703617	9.2e-05	0	0	0.000381752	0.000336191	0	6.1e-05	5.15e-05	0
BLAST_RHAA_BACTN L-rhamnose isomerase OS=Bacteroides thetaiotaomicron (strain ATCC 29148 / DSM 2079 / NCTC 10582 / E50 / VPI-5482) GN=rhaA PE=3 SV=1_Q8A1A2	0	5.75e-05	6.28e-05	0.000581734	4.63e-05	0.000182415	0	0	0	0	0.000118878	0	0	0	0	0.000683153	0	0.000123335	0.000675219	0.00013217	4.2e-05	7.46e-05	0	0	0.000154065	4.93e-05	0	0	0	0.00045208	5.36e-05	0	0	0.000661307	0.000252239	5.27e-05	0	0	0	6.4e-05	0	0.0012098	3.89e-05	0	0.000112064	0.000821482	0.000122018	0.000103066	0
BLAST_OMPA_BUCAI OmpA-like protein OS=Buchnera aphidicola subsp. Acyrthosiphon pisum (strain APS) GN=ompA PE=3 SV=1_P57414	0	0.000172612	6.28e-05	0	9.26e-05	0.000547246	0.000106413	0	0	0	0	0	0	0.00109557	0	0.000136631	0	0.000616675	0.000168805	0	0	0.00145425	0	0.000162107	0	0	0	7.61e-05	0.000173936	0.000123294	0	0.00011956	0.000180356	0	0.000189179	0	0.000269034	0	0	6.4e-05	0.000429106	0	0.000855965	0	0	5.13e-05	0.00109816	0.000618397	0
BLAST_MUTB_PORGI Methylmalonyl-CoA mutase large subunit OS=Porphyromonas gingivalis (strain ATCC BAA-308 / W83) GN=mutB PE=3 SV=1_Q59677	0	0.000690449	0.000188513	0	0	0	0.000283768	0.000145553	0	0	0	0.000145751	0	0.000128891	0	0	0	0.00271337	0.00033761	0	0	0.00104407	0.000114273	0	0.000192582	0.000148024	0	0	0	0.000164393	0	0	0	0.000174028	0	0	0.000134517	0	0	0	0.00076626	0.000100817	0.000194537	0	0	0.000564769	0	5.15e-05	0
Metagenome unknown	0.000190186	0	0	0	0.00013887	0.000136811	7.09e-05	0	0	5.49e-05	0	0	0	0	0	0	0	0	0	0.00026434	0.000839701	0	0.000514227	0	0.000539229	0	0.000387747	0.000304507	0.000347871	0.000287687	0.000107141	0.00023912	0.000252498	6.96e-05	0	0	0	0	0.000365275	0.000383791	6.13e-05	0	0	0.000190876	0.000392223	0.000256713	0.000183027	0	0
ALDOA_RABIT Fructose-bisphosphate aldolase A OS=Oryctolagus cuniculus GN=ALDOA PE=1 SV=2	0	0	0	0	0	0	3.55e-05	0	0	0	0	0	0	0	0	0	0	0	0	0	0	0	0	4.05e-05	0	0	0	0.00034257	0	0.000328785	0.000428564	0	0	0	0	0	0.00094162	0	0	0	0.000367805	0	0.000116722	0.000190876	0	0	0	0.000721464	0
BLAST_ADH1_CLOSA NADPH-dependent butanol dehydrogenase OS=Clostridium saccharobutylicum GN=adh1 PE=3 SV=1_P13604	4.75e-05	0.00023015	0.000439864	0	0	0.000410434	3.55e-05	0.000776285	0.000701927	0.00054936	0	0.000437254	0.000552384	0.000193336	0	0	0.000197472	0	0	0.000793021	0	7.46e-05	0	4.05e-05	0	0.00039473	0.000387747	0	0	0	0	5.98e-05	0	0.000591695	0	0	0	0	0.000121758	0	0.000459756	0.000100817	3.89e-05	0	0.000224127	0	0.000244036	0.000309199	5.64e-05
Metagenome unknown	0.00028528	0.000115075	6.28e-05	0	0	0	0	0	0.00228126	0.00027468	0.000118878	0.000194335	0	0	0	0	0.000888626	0	0	0.000330426	0	3.73e-05	0.000171409	0	0	0.000197365	0	0	0	0.000287687	0	0.00023912	3.61e-05	3.48e-05	6.31e-05	0	0	0.000105313	0	0.000447756	0.000429106	0	7.78e-05	0.000190876	0.000224127	0	0.000122018	0.000412265	0.000112892
Metagenome unknown	0.000332826	0	0	0	0	0	0	0.000291107	0	0	0	0.00106884	0	0	0	0	0	0	0.00033761	0	0	0	0	0.000121581	0	0	0	0	0	0.000780865	0	0.00017934	0	0.000139222	0.000378358	0	0	0	0	6.4e-05	3.07e-05	0.00126021	0	0	0	0	0	0	0
BLAST_MAO4_BACSU Probable NAD-dependent malic enzyme 4 OS=Bacillus subtilis (strain 168) GN=ytsJ PE=3 SV=1_O34962	0.000237733	0.000172612	0.000439864	0	0	0.000228019	0.00031924	9.7e-05	0.00038606	0	0	9.72e-05	0.00046032	0.000386673	0	0	9.87e-05	0	0	0.00026434	0	0.000111865	0.000457091	4.05e-05	7.7e-05	0.000246706	0.000193874	7.61e-05	4.35e-05	0	0	0	0	0	6.31e-05	0	0	0.000368596	0.000426154	9.59e-05	9.2e-05	0.000201633	7.78e-05	0	5.6e-05	0.000256713	0.000122018	0.000103066	0
HVM23_MOUSE Ig heavy chain V region HPCG8 OS=Mus musculus PE=1 SV=1	0.00028528	0	0	0	0	0.000182415	0.000248297	0	3.51e-05	0	0	0	0	0	0	0	0	0	0	0	0.000587791	0	0.000342818	0.000283688	0.00115549	0	0.000258498	7.61e-05	0.000826195	0.000369883	0.000267852	0.00017934	0.000252498	0	0	0.000263366	0	0.000368596	0	0.000575687	0	0	0	0	5.6e-05	0	0	0.000360732	0.000395123
BLAST_YDHC_BACSU Uncharacterized HTH-type transcriptional regulator YdhC OS=Bacillus subtilis (strain 168) GN=ydhC PE=4 SV=1_O05494	0.000380373	0.000172612	0.00270202	0	0	0.000136811	0	0.000339624	0	0	0	0.000485838	0.000276192	0	0.000557828	0	0	0	0.000506415	0	4.2e-05	0	0	0	0	0	0.000323123	0	0	0.000123294	0	0	0	0.000104417	0	0	0	0.000105313	0.000304395	0	0	0	0.000389075	0.000381752	0	0.000256713	0	0	0
BLAST_RHSC_ECOLI Protein RhsC OS=Escherichia coli (strain K12) GN=rhsC PE=1 SV=4_P16918	9.51e-05	0.000172612	0.000125676	0.000232693	0.00013887	9.12e-05	7.09e-05	9.7e-05	0.000105289	0.000164808	0.000118878	0.000145751	0.000184128	0.000128891	0.000557828	0.000136631	0.000394945	0.000123335	0.00033761	0.000330426	0	0	0.000399954	0.000121581	0.000192582	0.000246706	0.000193874	0.000152253	0.000260904	0.000246589	0	0.00011956	0.000216427	0.000139222	0.000252239	0.000158019	0.000134517	0.00015797	0.000121758	0.000159913	3.07e-05	0.000201633	7.78e-05	0	0.000280159	0.000102685	0.000244036	0.000206132	0.000112892
PNP_AZOPC Polyribonucleotide nucleotidyltransferase OS=Azobacteroides pseudotrichonymphae genomovar. CFP2 GN=pnp PE=3 SV=1	0	0	0	0	9.26e-05	0.00095768	0.0015962	0	0	0	0	0	0	0	0	0	0	0.00098668	0	0	0	0.00115594	0	0.000162107	0	0	0	0	0	0	0	0	0	0	0.000378358	0	0.00107614	0	0	0	0.00199228	0	0.00182865	0	0	0.000821482	0	0	0
CONG7_ARAHY Conglutin-7 OS=Arachis hypogaea PE=1 SV=2	0	0	0.000502702	0	0	0	0	0	0	0	0.00998574	0	0	0	0	0	0	0	0	0	0	0	0	0	0	0	0	0	0	0	0.00107141	0	0	0	0	0	0	0	0	0	0	0	0	0	0	0	0.00109816	0	0
BLAST_RL7_LACP7 50S ribosomal protein L7/L12 OS=Lachnoclostridium phytofermentans (strain ATCC 700394 / DSM 18823 / ISDg) GN=rplL PE=3 SV=1_A9KJL7	9.51e-05	0.000172612	0.000251351	0.00034904	0.00013887	0.000136811	7.09e-05	0.000145553	0.000140385	0.000109872	0.000237756	0.000194335	0.000276192	0.000193336	0	0.000546523	9.87e-05	0.00024667	0.00033761	0.000198255	0	7.46e-05	0.000228545	4.05e-05	7.7e-05	0.000246706	0.000258498	3.81e-05	0	0.000164393	0	0.00017934	0.000108213	0.000139222	0.000189179	0	0.000403551	0.000210626	0.000243516	9.59e-05	0.000153252	0.000100817	0.000116722	0	0.000224127	0.00020537	0.000244036	0.000206132	0.000169338
BLAST_GUNB_CLOC7 Endoglucanase B OS=Clostridium cellulovorans (strain ATCC 35296 / DSM 3052 / OCM 3 / 743B) GN=engB PE=3 SV=1_P28621	0	0.00103567	0	0	0	0	0	0.000145553	0.00038606	0.000329616	0	0	0	0	0	0	0.000592417	0	0	0	0	0	0	0	0	0	0	0	0	0	0	0	0	0.00337614	0	0	0	0	0	0	0.00355545	0	0	0	0	0	0	0	0
BLAST_CAT1_CLOK5 Succinyl-CoA:coenzyme A transferase OS=Clostridium kluyveri (strain ATCC 8527 / DSM 555 / NCIMB 10680) GN=cat1 PE=2 SV=1_P38946	4.75e-05	0.00115075	0.000125676	0	0	0	0.00237656	0	0	0	0	0	0	0	0	0	0	0	0	0	0	0	0	0	0	0.000444072	0	0	0	0.000410981	0	0	0	0	0	0	0.00161421	0	0	0.000351809	0.00122602	0	7.78e-05	0	0	0	0	0	0
BLAST_RS8_LACP7 30S ribosomal protein S8 OS=Lachnoclostridium phytofermentans (strain ATCC 700394 / DSM 18823 / ISDg) GN=rpsH PE=3 SV=1_A9KJI0	0.00014264	0.000345224	0.000188513	0.00034904	0	0.000319227	0.000141884	0.000194071	0.000350963	5.49e-05	0.000356633	0.00038867	0.000368256	0.000128891	0.000185943	0	0	0	0	0.00013217	0	0	0.000171409	0	0.000115549	0.000148024	0.000129249	0	8.7e-05	8.22e-05	0	0.00053802	0.000108213	0.000139222	0	0	0	0.000263283	0.000243516	0.000159913	9.2e-05	0.000100817	3.89e-05	0	0.00061635	0.000359398	0.000366055	0.000257666	0
BLAST_CLPB_BACTN Chaperone protein ClpB OS=Bacteroides thetaiotaomicron (strain ATCC 29148 / DSM 2079 / NCTC 10582 / E50 / VPI-5482) GN=clpB PE=3 SV=1_Q89YY3	9.51e-05	0.00023015	0.000439864	0.000116347	4.63e-05	0.000182415	0.00031924	0.000194071	0.000315867	0.000164808	0.000237756	4.86e-05	0.000368256	6.44e-05	0.000185943	0	0.000197472	0.000123335	0	0.000198255	0	0.000671191	0	8.11e-05	0	0	6.46e-05	0	0	0	0	5.98e-05	3.61e-05	0.000104417	0.000189179	0.00121148	0.00201776	0.00015797	0	0	0	0.0006049	0.00015563	0	0.000168095	5.13e-05	0.000122018	0.000412265	0
Metagenome unknown	0	0	0	0.000116347	0.00013887	4.56e-05	0.000141884	9.7e-05	7.02e-05	0	0.000118878	4.86e-05	0.000184128	0.000193336	0.000371885	0.000136631	0	0	0.00033761	0.00013217	0.00025191	3.73e-05	5.71e-05	0.000162107	3.85e-05	0	0.000323123	0.000152253	0.000260904	0	5.36e-05	0.00035868	7.21e-05	3.48e-05	0.000315298	0.000421385	0.000134517	0.000105313	0.000121758	0	0	5.04e-05	7.78e-05	0	0.000280159	0	0.000183027	0	5.64e-05
Metagenome unknown	0	0	0.00314189	0	0	0	0	0	0	0	0	0	0	0	0	0.000136631	0	0	0	0	0	0	0	0	0	0	0	0	0	0	0	0	0	0.00417667	0	0	0	0	0	0	0	0	0	0	0	0	0	0	0
Metagenome unknown	0	0.0018412	0	0	0	0.00155053	0	0	0.000596638	0	0	0	0	0	0	0	0	0.00098668	0	0	0	0	0	0	0	0	0	0	0	0.000205491	0	0	0	0	0	0	0	0	0	0	0	0	0	0	0.00341794	0	0	0	0
BLAST_EXBB_MANHA Biopolymer transport protein ExbB OS=Mannheimia haemolytica GN=exbB PE=3 SV=1_P72202	0	0	0	0	0.000601768	0.000866472	0.000567537	0	0	0	0	0	0	0	0	0	0	0.00098668	0	0	4.2e-05	0.00108136	0	0.000567376	0	0	0	0	0	0	0	0.0002989	0	0	0.00182873	0	0	0	0.000121758	0	0.000337154	0	0.000700335	0	0	0.000410741	0	0	0
Metagenome unknown	0	0	0.00194797	0	0.00310142	0.000182415	0	0	0	0	0	0	0.000184128	0	0	0	0.000987362	0	0	0	0	0	0	0	0	0	0	0	0	0	0	0	0	0	0	0	0	0	0	0	0	0	0	0	0	0	0	0	0
BLAST_SYK_BACTN Lysine--tRNA ligase OS=Bacteroides thetaiotaomicron (strain ATCC 29148 / DSM 2079 / NCTC 10582 / E50 / VPI-5482) GN=lysS PE=3 SV=1_Q8A5W4	0.000332826	5.75e-05	0	0.000581734	0.000231449	0	0.000141884	0	7.02e-05	5.49e-05	0	0.000145751	0.00046032	6.44e-05	0	0	0.000296209	0.000123335	0	0.00013217	0.000587791	0	5.71e-05	8.11e-05	7.7e-05	0	0	0.00034257	0.000260904	0.000328785	0.000214282	0.00035868	0.000108213	0.000104417	0.000378358	5.27e-05	0	0.000105313	0.000243516	0.000223878	0.000275854	0.000352858	0	0	5.6e-05	0	0.000122018	0	0.000112892
Metagenome unknown	9.51e-05	5.75e-05	0	0	0	0	0.000957719	4.85e-05	0	5.49e-05	0	0.000145751	9.21e-05	0	0.000185943	0	0	0	0	0.00026434	0.00327483	0	0.000114273	4.05e-05	3.85e-05	0	6.46e-05	0.00068514	0	0.000287687	0	0	0	0	0	5.27e-05	0	0.000105313	6.09e-05	3.2e-05	0	0	0	0.000190876	0.000112064	0	0	5.15e-05	5.64e-05
Metagenome unknown	9.51e-05	5.75e-05	0	0.00034904	9.26e-05	4.56e-05	3.55e-05	9.7e-05	3.51e-05	5.49e-05	0	4.86e-05	0.000184128	0	0.000371885	0	9.87e-05	0.000123335	0.000168805	0.000198255	0.00025191	7.46e-05	0.000342818	0.000283688	7.7e-05	0.000148024	0.000193874	7.61e-05	4.35e-05	0	0.000160711	0.0002989	7.21e-05	6.96e-05	0	0.000105346	0	0.000105313	6.09e-05	9.59e-05	3.07e-05	0.000252042	7.78e-05	0.000572628	0.000280159	5.13e-05	0	0	0.000169338
BLAST_PGK_CLONN Phosphoglycerate kinase OS=Clostridium novyi (strain NT) GN=pgk PE=3 SV=1_A0PYP1	0	0	0	0.000116347	0	0.000182415	0	9.7e-05	0.00143895	0.000769104	0	0.000437254	0.000368256	0.000322227	0	0	0	0	0	0.000660851	0	0	0	0	0	0.00187497	0	0	0	0	0	0	0	0	0	0	0	0	0.00066967	0	9.2e-05	5.04e-05	0.000116722	0	0	0	0.000610091	0.00066993	0
Metagenome unknown	9.51e-05	0.000115075	0	0.00034904	0.00013887	0	0.000177355	0	0.000105289	0.000109872	0.000356633	0	0.000276192	0.000193336	0.000185943	0.000136631	0.000197472	0	0.000168805	6.61e-05	0.000209925	0.000149154	0.000285682	8.11e-05	0.000269614	0	0.000193874	0.00022838	0.000173936	8.22e-05	0.000160711	0.00023912	0.000108213	3.48e-05	0.000378358	0.000210693	0	0.000263283	0	0.000287843	0	0.000100817	0.000194537	0.000763504	0.000168095	0.000154028	0.000183027	0.000103066	0.000169338
Metagenome unknown	0.000237733	0.000287687	0	0	9.26e-05	0.000273623	0.000141884	0	0.000175482	0	0	9.72e-05	0.000184128	0.000257782	0	0.000546523	0	0	0.000168805	0.000396511	0	3.73e-05	0	0.000162107	0	0.000296048	0.000258498	0	0	0	0	0.00035868	7.21e-05	0.000104417	0.000567537	0	0.000269034	0.000105313	0	0	0.00171642	0	0.000233445	0	0.000280159	0.000308056	0.000244036	0.000463798	0.000395123
Metagenome unknown	0	0.000172612	0	0.000465387	0	0	0.000106413	0	0.000105289	0	0	0.000145751	0.000184128	0.000193336	0	0	9.87e-05	0	0	0.00026434	0	3.73e-05	0.000114273	0.000202634	0	0.000197365	0.000193874	0.00022838	0	0.000205491	0.000267852	0.00023912	0	0	0	0	0	0.000631878	0.000182637	0	0.000153252	0.000100817	0.000116722	0.000190876	0.000168095	0.000154028	0.000244036	0.000257666	0.000112892
BLAST_BCRA_THAAR Benzoyl-CoA reductase subunit A OS=Thauera aromatica GN=bcrA PE=1 SV=1_O87876	0.000332826	0.000172612	0.00238784	0	0	0.000182415	0	0.00043666	0	0	0	0.000437254	0.000368256	0	0.000557828	0	0	0	0.000675219	0	0	0	0	0	0	0	0.000387747	0	0	0.000123294	0	0	0	0.000139222	0	0	0	0.000105313	0.000304395	0	0	0	0.000505797	0.000190876	0	0.000256713	0	0	0
Metagenome unknown	0	0	0	0.000465387	0	0	3.55e-05	4.85e-05	3.51e-05	0	0	0	0	0	0	0	0	0	0.000168805	6.61e-05	0.00025191	0	0.000342818	0.000121581	0.000192582	0	0.000516996	0.00045676	0.000130452	8.22e-05	0	0	0.000180356	0	0.000252239	0.000421385	0.000134517	0.000737191	0	0.000351809	0	0.000151225	0.00031126	0.000190876	0.000560318	0.00020537	0	0	0
BLAST_PORF_PSEFL Outer membrane porin F OS=Pseudomonas fluorescens GN=oprF PE=1 SV=1_P37726	0	0	0	0	0	0	0	0	0	0	0	0	0	0	0.000185943	0	0	0	0	0	0	0	0	0.000364742	0	0	6.46e-05	0	0	0	0	0	0	0	0.00428806	0	0	0	0	0	0	0	0	0	0	0.00297787	0	0	0
Metagenome unknown	0.00014264	5.75e-05	6.28e-05	0.000232693	0.000231449	4.56e-05	3.55e-05	0.000145553	7.02e-05	0	0.000118878	4.86e-05	0.000184128	0	0	0.000136631	0	0	0	0.000198255	0.000419851	3.73e-05	0.000114273	0.000202634	0	4.93e-05	6.46e-05	3.81e-05	0.000260904	0	5.36e-05	0.00047824	7.21e-05	6.96e-05	0.000441418	0.000210693	0	0.00015797	0.000182637	9.59e-05	9.2e-05	0.000201633	0	0.000190876	0.000112064	0.00020537	0.000183027	5.15e-05	5.64e-05
Metagenome unknown	4.75e-05	0.00023015	0.000251351	0.000581734	0.00013887	0.000182415	0.000141884	9.7e-05	7.02e-05	0	0.000237756	0.000145751	0.000184128	0.000128891	0.000185943	0.000409892	0.000197472	0.000123335	0	0.000198255	0	0	0	0.000162107	0.000115549	4.93e-05	0.000193874	0.00011419	0.000130452	4.11e-05	0.000160711	5.98e-05	0.000108213	6.96e-05	0.000252239	0	0.000403551	5.27e-05	0.000243516	0.00012793	6.13e-05	0.000151225	7.78e-05	0.000190876	5.6e-05	0.000102685	6.1e-05	0.000206132	0.000225785
BLAST_CRT_CLOAB Short-chain-enoyl-CoA hydratase OS=Clostridium acetobutylicum (strain ATCC 824 / DSM 792 / JCM 1419 / LMG 5710 / VKM B-1787) GN=crt PE=1 SV=1_P52046	0	0	0	0.00034904	0	0	0	0	0.000526445	0.00109872	0.000118878	0.000825924	0.000552384	0.000322227	0	0	0.000394945	0.000123335	0	0.000462596	0	0	0	0	0	0.000690778	0.000387747	0	0	8.22e-05	0	0	0	0	0	0	0	0.000210626	0.000121758	0	0	0.000100817	0	0	0.00117667	0	0.000610091	0.000979129	0
BLAST_UXAB_BACV8 Altronate oxidoreductase OS=Bacteroides vulgatus (strain ATCC 8482 / DSM 1447 / JCM 5826 / NBRC 14291 / NCTC 11154) GN=uxaB PE=3 SV=1_A6L4U5	0.000190186	0.000345224	0	0	9.26e-05	0.000319227	0.000461124	0	0	0	0	0	0	0	0.000185943	0	9.87e-05	0.00024667	0	0.00013217	4.2e-05	0.00111865	0	0	0	0	6.46e-05	7.61e-05	0	0	0	0	0	0.00100936	0.00138731	0.000368712	0.000134517	0	0	6.4e-05	6.13e-05	0.000151225	0.00116722	0.000190876	0	0.000308056	0	0	5.64e-05
BLAST_QUEA_RHORT S-adenosylmethionine:tRNA ribosyltransferase-isomerase OS=Rhodospirillum rubrum (strain ATCC 11170 / ATH 1.1.1 / DSM 467 / LMG 4362 / NCIB 8255 / S1) GN=queA PE=3 SV=1_Q2RXQ9	0.00014264	0.000172612	0.000125676	0	0.00013887	0.000182415	3.55e-05	0.000194071	0.000105289	0.000219744	0.000237756	0	0	0	0.000371885	0.000409892	0	0.00049334	0.000675219	0.000198255	0.000125955	3.73e-05	0.000342818	0.000162107	0.000115549	0.000148024	0.000258498	0.000152253	0.000173936	0.000205491	0.000267852	5.98e-05	7.21e-05	0	0	0	0.000134517	0	0.000304395	0.00012793	0.000122602	0.000252042	0	0.000381752	0.000224127	0.000154028	0	0.000206132	5.64e-05
BLAST_FEOAB_PORGI Fe(2+) transport protein A/Fe(2+) transporter FeoB fusion protein OS=Porphyromonas gingivalis (strain ATCC BAA-308 / W83) GN=feoB1 PE=3 SV=1_Q7MV19	9.51e-05	0	0	0.000581734	0	0	7.09e-05	0	7.02e-05	0	0.000594389	0	0	0	0	0	0	0	0	0	0.00033588	0.000186442	0.000342818	0.000324215	0.000269614	0	0.000387747	0.000380633	0.000304388	0.000287687	0.000482134	0.00023912	0.000288569	0	0.000315298	0.000316039	0	0.000368596	0	0.000255861	0	0	0	0.000381752	0.000392223	0	0.000366055	0	0
BLAST_FLA_CLOTY Flagellin (Fragment) OS=Clostridium tyrobutyricum GN=fla PE=1 SV=2_P80583	0	0.000978136	0.000754053	0	0.000370319	0.00036483	0	0	0.000350963	0	0	0.000923092	0	0	0	0	0	0	0.000168805	0.00026434	0	0	0	0.000364742	0	0.00113485	0	0	0	0	0	0	7.21e-05	0.000452473	0	0	0	0	0.000243516	0	0	0	0.00015563	0	0	0	0	0	0
BLAST_PTAS_BACSU Phosphate acetyltransferase OS=Bacillus subtilis (strain 168) GN=pta PE=1 SV=3_P39646	0	0.000747986	6.28e-05	0	0	0.000820868	0.000177355	0.00043666	0.00122837	0.000164808	0.000118878	0	0.000276192	0	0.000185943	0	0.000691153	0.00024667	0.000168805	0.00013217	0	3.73e-05	0	0	0	0	0	7.61e-05	0	0	0	0	0	0.000626501	0.000126119	0	0	0	0.000243516	0	0.000429106	0	0.00015563	0	0	0.000359398	0	0.000412265	0
BLAST_DHA_MYCS2 Alanine dehydrogenase OS=Mycobacterium smegmatis (strain ATCC 700084 / mc(2)155) GN=ald PE=1 SV=1_A0QVQ8	0	0	0	0	0	0	0	0	0	0	0	4.86e-05	0	0	0	0	0	0	0	0	0	0	0.000571363	0.000162107	0.000770327	9.87e-05	0.000516996	0.000152253	0.000173936	0.000205491	0	0.00041846	0.000757494	0.000417667	0	0	0	0.000315939	0.000365275	0.000447756	0	0.000201633	3.89e-05	0	0.000336191	0	0.000732109	0.000103066	0.000338677
Metagenome unknown	0	0.000172612	0	0	9.26e-05	0.000228019	0.000106413	0	0	0.000109872	0	0	0	0	0	0	0.000691153	0.000370005	0.00118163	0	0	0	0	8.11e-05	0	0	0	0	0	0	0	0.00023912	0	0	0	0	0	0	0	0	0.000245203	0	0	0	0	0.000359398	0.000610091	0.000103066	0
Metagenome unknown	9.51e-05	0	0	0.000232693	0.00013887	9.12e-05	0	0	0	0	0.000118878	0	9.21e-05	0	0	0	0	0	0	0.000198255	0.000587791	0	0.000457091	0	0.000308131	0	0.000387747	0.00034257	0.000434839	8.22e-05	0	0.00035868	0.000216427	3.48e-05	0.000315298	0.000210693	0	0	0.000243516	0.000511722	3.07e-05	5.04e-05	0	0	0.000336191	0.000102685	0.000122018	0	0
Metagenome unknown	0.00028528	0.000172612	6.28e-05	0	0.000231449	0	7.09e-05	9.7e-05	0.000210578	5.49e-05	0.000356633	0.000291503	0	0	0.000743771	0.000956415	0	0	0.000675219	0.000198255	0	0	0	4.05e-05	3.85e-05	0.000246706	6.46e-05	7.61e-05	0.000434839	0.000698668	0	0	0.000144285	0.000278445	0	0.000158019	0	0	0.000182637	0.000351809	0	0.000403266	0	0	0.000728414	0	0	0.000103066	0.000112892
P2C74_ORYSJ Probable protein phosphatase 2C 74 OS=Oryza sativa subsp. japonica GN=Os11g0242200 PE=3 SV=1	0.00014264	0	0	0.000116347	0.000277739	4.56e-05	0.000141884	0	3.51e-05	5.49e-05	0	0	9.21e-05	6.44e-05	0	0	9.87e-05	0	0	0.00013217	4.2e-05	3.73e-05	0.000114273	8.11e-05	3.85e-05	0.000197365	0.000387747	0.00022838	0.00021742	4.11e-05	0	0.00023912	0.000108213	3.48e-05	0.000252239	0.000421385	0	5.27e-05	0.000243516	6.4e-05	0.000337154	0.00030245	3.89e-05	0	0.000112064	0.00020537	0.000488073	0	0.000169338
Metagenome unknown	0	0	0.00169662	0	0.000277739	0	0	0.000194071	0.000526445	0	0	0	9.21e-05	0	0	0	0.00187599	0	0	0.000528681	0	0.000261019	0	0	0	0.000789461	0	0	0	0.000328785	0	0	0	0.00233198	0	0	0.00121065	0	0	0	0	0.000352858	0	0	0	0	0.000183027	0	0
OMPX_ENTCL Outer membrane protein X OS=Enterobacter cloacae GN=ompX PE=1 SV=1	0	0	0	0	0	0	0	0	0	0	0	0	0	0	0	0	0	0	0	0	0.000209925	0.000745768	0	0	0	0	0	0	8.7e-05	0.000493178	0	0	0	0	0	0.00205425	0.00228679	0.000315939	0	0	0	0.000806533	0	0	0.000392223	0	0	0	0
BLAST_RL10_GEOSW 50S ribosomal protein L10 OS=Geobacillus sp. (strain WCH70) GN=rplJ PE=3 SV=1_C5D3Q6	0	5.75e-05	0	0.000232693	0	0.000182415	0	0	0.000210578	0	0	0	0.000920641	0	0	0	0	0	0.000168805	0	0	0.000149154	0	8.11e-05	0	0	0.000129249	0	0	0	0	0	0	0.000417667	0	0	0	0	0.000243516	0	0	0.000403266	7.78e-05	0	0.000560318	0	0.000732109	0	0.000677354
Metagenome unknown	0	0	0	0	0.00166643	0	0	0	0	5.49e-05	0	0	0	0	0	0	0	0	0.00253207	0	0	0	0	0	0	0	0.00129249	0	0	0	0	0	0	0	0	0	0	0	0	0	0	0	0	0	0	0	0.00176926	0	0
Metagenome unknown	9.51e-05	0	0	0.00069808	0.000185159	0.000136811	3.55e-05	9.7e-05	7.02e-05	0.000164808	0.000356633	0	9.21e-05	0.000128891	0.000371885	0.000136631	0	0.00024667	0.000168805	0.000396511	0.000209925	0	0.000285682	0	0.000154065	0	0.000193874	0.000152253	0.000130452	0	0.000214282	0.00041846	0.000180356	0	0.000126119	0.000316039	0	0.000210626	0	0.000191896	0	0	3.89e-05	0.000381752	0.000168095	0	0.000122018	5.15e-05	0.000169338
Metagenome unknown	0	0	0	0	0	0.00168734	0	0	0	0	0	0	0	0	0	0	0	0.0024667	0	0	0	0.000559326	0	0	0	0	0	0	0	0.00131514	0	0	0	0	0	0	0.00094162	0	0	0	0	0	0.000739242	0.000190876	0	0.000359398	0	0	0
BLAST_RL11_LACP7 50S ribosomal protein L11 OS=Lachnoclostridium phytofermentans (strain ATCC 700394 / DSM 18823 / ISDg) GN=rplK PE=3 SV=1_A9KJM0	0.00028528	0.000115075	0	0.000232693	0	4.56e-05	7.09e-05	0.000194071	0.000280771	0.000329616	0.000356633	0.000242919	0.000368256	0	0.000185943	0	0	0	0	0.00013217	0	3.73e-05	0.000228545	0	0.000154065	0.00039473	0.000129249	0	8.7e-05	0.000246589	0	0.00011956	0	3.48e-05	0.000315298	0	0.000134517	0.000263283	0	0.000191896	0.000153252	0.000252042	0.00015563	0	0.000504286	0.000359398	0.000427064	0.000257666	0
BLAST_ANXA4_CANLF Annexin A4 OS=Canis lupus familiaris GN=ANXA4 PE=1 SV=2_P50994	0.000380373	0	0	0	0	0	0	0	0	0	0	0	0	6.44e-05	0	0	0	0	0	0	0.000587791	7.46e-05	0.000228545	0.00149949	0.000462196	9.87e-05	0.000387747	0.00175091	0	0	0.000857128	0	0	0	0	0.000105346	0	0.000210626	0	0	6.13e-05	0	0.00046689	0	0	0.000256713	0	0.000103066	0
BLAST_RL3_BACTN 50S ribosomal protein L3 OS=Bacteroides thetaiotaomicron (strain ATCC 29148 / DSM 2079 / NCTC 10582 / E50 / VPI-5482) GN=rplC PE=3 SV=1_Q8A476	0	0.000115075	0	0.000232693	0	0.00036483	0.000106413	0.000194071	0	0	0	0.000242919	0	0	0.000185943	0	0	0.00135669	0.000675219	0	0	0.000969498	5.71e-05	0	0.000462196	0	0	0	0.00104361	0	0	0.00011956	7.21e-05	3.48e-05	0	0.000526732	0.00094162	0	0	0.000575687	0.000337154	0	0.000739242	0	0.000392223	0.000616111	0.000183027	0	0
Metagenome unknown	0.00014264	0.000287687	0.000125676	0	0.00013887	9.12e-05	0.000177355	0.000145553	0.000175482	0.000164808	0.000356633	0.000194335	0	0.000322227	0.000557828	0.000273261	9.87e-05	0.00049334	0.00033761	6.61e-05	4.2e-05	0.000111865	0	0.000162107	0.000115549	9.87e-05	0.000129249	0.00011419	0.000173936	0.000123294	0.000267852	0	7.21e-05	0	0	0.000210693	0.000403551	0	0.000121758	0.00012793	9.2e-05	0.000201633	0.00015563	0.000190876	0	0.000102685	6.1e-05	0.000154599	0.000282231
BLAST_RPOB_BACV8 DNA-directed RNA polymerase subunit beta OS=Bacteroides vulgatus (strain ATCC 8482 / DSM 1447 / JCM 5826 / NBRC 14291 / NCTC 11154) GN=rpoB PE=3 SV=1_A6KYK3	0	0.00023015	0.000377027	0	0	0.000182415	0.000141884	0.000388142	0	0.000219744	0	0.000194335	0	0	0	0	0.000197472	0	0	0.00026434	0	0.000708479	0.000114273	0.000162107	0.000231098	0.000296048	0	0	0	0	0	0	0	0.000661307	0	0	0	0	0	0.000191896	0.000521057	0.000504083	0.000505797	0	0.000112064	0.000462083	0.000122018	0.000618397	0.000225785
BLAST_PO21_NASVI Retrovirus-related Pol polyprotein from type-1 retrotransposable element R2 (Fragment) OS=Nasonia vitripennis PE=3 SV=2_Q03278	0	0	0	0.000465387	0	0	0	4.85e-05	0	0.000164808	0.000237756	0	0.000184128	0	0.000185943	0	0	0	0	0	0.000209925	0	0.000114273	0.000283688	0	0	0.000193874	0.000266443	0	0	0.000267852	0.0002989	7.21e-05	0	0.000630597	0.000158019	0	0.00152704	0	0	0	0.000151225	3.89e-05	0.000190876	0.000112064	0.000102685	0.000122018	0.000206132	0.000112892
Metagenome unknown	0	0	0	0	0	0	0	0	0	0	0	0	0	0	0	0	0	0	0	0	0	0	0	0	0.00604707	0	0	0	0	0	0	0	0	0.00268003	0	0	0	0	0	0	0	0	0	0	0	0	0	0	0
RS8_YERPY 30S ribosomal protein S8 OS=Yersinia pseudotuberculosis serotype O:3 (strain YPIII) GN=rpsH PE=3 SV=1	0.000190186	0.000172612	6.28e-05	0.000465387	0.00013887	9.12e-05	0.000106413	4.85e-05	0.000105289	5.49e-05	0.000237756	0.000145751	0.000276192	6.44e-05	0.000185943	0.000273261	9.87e-05	0	0.000168805	0.000198255	4.2e-05	7.46e-05	0.000514227	8.11e-05	0.000231098	0.000246706	0.000258498	0.000190317	0.000130452	0.000205491	0	0	0.000144285	3.48e-05	0.000315298	0.000105346	0	0.000263283	0	0	0.000153252	0	7.78e-05	0	0.000392223	0.000154028	0	0.000154599	0
BLAST_RS8_CALS4 30S ribosomal protein S8 OS=Caldanaerobacter subterraneus subsp. tengcongensis (strain DSM 15242 / JCM 11007 / NBRC 100824 / MB4) GN=rpsH PE=3 SV=1_Q8R7W8	0.000190186	0.000172612	6.28e-05	0.000581734	0.00013887	9.12e-05	0.000106413	4.85e-05	0.000105289	5.49e-05	0.000237756	0.000145751	0.000276192	6.44e-05	0.000185943	0.000273261	9.87e-05	0	0.000168805	0.000198255	4.2e-05	7.46e-05	0.000514227	8.11e-05	0.000231098	0.000246706	0.000258498	0.000190317	0.000130452	0.000246589	0	0	0.000144285	3.48e-05	0.000315298	0	0	0.000263283	0	0	0.000153252	0	7.78e-05	0	0.000336191	0.000154028	0	0.000154599	0
BLAST_CHVE_AGRFC Multiple sugar-binding periplasmic receptor ChvE OS=Agrobacterium fabrum (strain C58 / ATCC 33970) GN=chvE PE=1 SV=2_P25548	0	0.00023015	0	0	0	0	0.000212826	9.7e-05	0.000491349	0.000109872	0	0.000291503	0.000552384	0.000257782	0.000185943	0.000273261	0	0.000123335	0	0.000859107	0	0	0.000114273	0	0	0.000296048	0.000129249	3.81e-05	0	0	0	0.00011956	0	0.000487279	0.000126119	0	0.000134517	0.000105313	0.000243516	0.000383791	0.000214553	0	0	0	0.000224127	0.000102685	0.000488073	0	0
BLAST_AMY1_ECOLI Periplasmic alpha-amylase OS=Escherichia coli (strain K12) GN=malS PE=1 SV=1_P25718	0	0.000287687	0	0	0.000370319	0.00036483	0	0	0.000210578	0	0	0	0.000184128	0.000386673	0	0	0	0	0	0	0	0.000335595	0	0	0	0	0.000581621	0	0	0.000164393	0	0	0	0.000939751	0	0	0	0	0	0	0	5.04e-05	0.000194537	0	0.00112064	0	0.000549082	0	5.64e-05
Metagenome unknown	0	0	0	0	0	0	0	0	0	0	0	0	0	0	0	0	0	0	0	0	0.000797716	0	0.000228545	0.000607903	0.000231098	0	0.000387747	0.00034257	0.000434839	0.00110965	0.000107141	5.98e-05	7.21e-05	0	0	0	0	0	0.000182637	0.000383791	0	5.04e-05	0	0	0.000112064	0.000154028	0	5.15e-05	0
BLAST_RL11_LACP7 50S ribosomal protein L11 OS=Lachnoclostridium phytofermentans (strain ATCC 700394 / DSM 18823 / ISDg) GN=rplK PE=3 SV=1_A9KJM0	0.00028528	0.000115075	0	0.000232693	0	4.56e-05	7.09e-05	0.000194071	0.000280771	0.000329616	0.000356633	0.000242919	0.000368256	0	0.000185943	0	0	0	0	0.00013217	0	3.73e-05	0.000228545	0	0.000154065	0.00039473	0.000129249	0	0	0.000205491	0	0.00011956	0	3.48e-05	0.000315298	0	0.000134517	0.000263283	0	9.59e-05	0.000153252	0.000252042	0.00015563	0	0.000448255	0.000359398	0.000427064	0.000257666	0
BLAST_RL17_EUBE2 50S ribosomal protein L17 OS=Eubacterium eligens (strain ATCC 27750 / VPI C15-48) GN=rplQ PE=3 SV=1_C4Z2V8	0.000618106	0.000345224	0.000125676	0.00034904	9.26e-05	0.000182415	0	0.000291107	0.000175482	0.00027468	0.000237756	0.000291503	0.000368256	0.000322227	0.000557828	0.000273261	0	0	0.000168805	0.000396511	4.2e-05	7.46e-05	0	0	3.85e-05	0.000246706	0.000258498	0.00011419	0	8.22e-05	0.000107141	0.00017934	0.000108213	6.96e-05	0	0	0	0.00015797	0.000182637	3.2e-05	6.13e-05	0.000100817	0.000116722	0	0.000336191	0.000154028	0.000183027	0.000257666	0
Metagenome unknown	0.00014264	0.00023015	6.28e-05	0.000465387	9.26e-05	0.000182415	0.000141884	0.000194071	0.000210578	0.000219744	0.000237756	0.000242919	0.00046032	0.000193336	0.000371885	0.000409892	0.000296209	0.00024667	0.000506415	0.000330426	0	0	0.000285682	0	3.85e-05	0.000197365	0.000129249	7.61e-05	0	0.000246589	0	0.00011956	0.000108213	0.000104417	6.31e-05	0.000105346	0	0.000105313	0.000121758	0	9.2e-05	5.04e-05	0	0.000381752	0.000336191	0.00020537	6.1e-05	0.000206132	0
BLAST_TTDB_SHIFL L(+)-tartrate dehydratase subunit beta OS=Shigella flexneri GN=ttdB PE=3 SV=1_P0AC37	9.51e-05	0.000115075	0.000251351	0.00034904	9.26e-05	0.000136811	0.000106413	0.000145553	0.000105289	0.000164808	0.000237756	9.72e-05	0.00046032	0.000193336	0.000371885	0.000273261	0.000197472	0.00024667	0.00033761	0.00013217	8.4e-05	0.000111865	5.71e-05	0.000121581	0.000115549	4.93e-05	0	0.00011419	8.7e-05	0	0.000214282	0.00017934	3.61e-05	0	0.000315298	0.000263366	0.000269034	0.000210626	0.000243516	6.4e-05	0	0.000201633	0.00015563	0.000381752	0.000224127	0.000154028	0.000183027	0.000154599	0.000112892
Metagenome unknown	4.75e-05	0	0	0.000116347	9.26e-05	0	3.55e-05	9.7e-05	0	0	0.000118878	4.86e-05	0	6.44e-05	0	0.000136631	9.87e-05	0.000123335	0.000506415	6.61e-05	0.000545806	0	0.000114273	4.05e-05	3.85e-05	0	0.000193874	0	4.35e-05	0	0	0.00035868	0	3.48e-05	0.000315298	0.000210693	0	0.000105313	6.09e-05	6.4e-05	0	0.000151225	0	0.000381752	0.000168095	0	6.1e-05	0	0
S10A7_HUMAN Protein S100-A7 OS=Homo sapiens GN=S100A7 PE=1 SV=4	0	0	0	0	0	0	3.55e-05	0	0.000140385	0	0	0	0	0	0	0	0	0	0	0	0.00025191	0	0	0.000972644	0.000539229	0	0	0.000266443	0	0	0	0	0	0	0	5.27e-05	0.000269034	0	0	0	0	0	0.000389075	0	0	0.000359398	0	0	0.000790246
BLAST_ADPR_LACLL ATP-dependent protease OS=Lactococcus lactis subsp. lactis PE=4 SV=1_Q06715	4.75e-05	0.000287687	0.000251351	0.00034904	9.26e-05	0.000182415	0.000177355	0.000242589	0.000105289	0.00027468	0.000356633	0.000194335	0.000368256	0.000128891	0.000185943	0	9.87e-05	0	0	0.00026434	0	0.000111865	0	0.000162107	0	0.000197365	0.000129249	0	0	0	0.000107141	0.0002989	0.000144285	0.000139222	0.000378358	0	0	0.000315939	0.000304395	0	0.000183902	5.04e-05	0.000194537	0	0.000168095	0.000154028	0.000305045	0.000257666	0.000169338
BLAST_BUDR_KLEAE HTH-type transcriptional regulator BudR (Fragment) OS=Klebsiella aerogenes GN=budR PE=3 SV=1_P52665	0.000190186	5.75e-05	6.28e-05	0	9.26e-05	9.12e-05	7.09e-05	9.7e-05	0.000140385	0.000109872	0.000118878	9.72e-05	9.21e-05	0.000257782	0.000371885	0.000409892	9.87e-05	0.00024667	0.000506415	0.00026434	0.000125955	0	0.000171409	4.05e-05	0	9.87e-05	6.46e-05	7.61e-05	0	8.22e-05	0.000160711	5.98e-05	0.000108213	0	0.000126119	5.27e-05	0.000134517	0.000105313	0.000121758	0	3.07e-05	0.000100817	7.78e-05	0	0.000168095	0.00020537	6.1e-05	0	5.64e-05
BLAST_TFRA_METTM Fumarate reductase (CoM/CoB) subunit A OS=Methanothermobacter marburgensis (strain ATCC BAA-927 / DSM 2133 / JCM 14651 / NBRC 100331 / OCM 82 / Marburg) GN=tfrA PE=1 SV=1_D9PU00	0.000190186	0.000345224	0.000125676	0.000116347	0	0.000273623	0.000141884	0.000388142	0.000350963	0.000439488	0.000118878	0.000242919	0.000184128	0.000257782	0.000557828	0.000273261	0.000296209	0.000370005	0	0.00013217	0	0	0	0	0	0.00039473	0	0	0	0.000164393	0	0.00035868	0	0.000278445	0	0	0	0	0	0	6.13e-05	0.00030245	0	0	0	0	0.000244036	0.000206132	0
BLAST_LYTE_BACSU Probable peptidoglycan endopeptidase LytE OS=Bacillus subtilis (strain 168) GN=lytE PE=1 SV=1_P54421	0.00014264	0.000115075	0.000188513	0.000116347	4.63e-05	0.000136811	7.09e-05	4.85e-05	0.000140385	0.000109872	0.000118878	9.72e-05	0.000184128	0.000128891	0	0.000136631	0	0.00024667	0	0.00013217	0.000125955	0.000111865	0.000171409	0.000202634	0.000154065	0	0.000193874	0.000152253	0.00021742	0.000246589	5.36e-05	0.00023912	7.21e-05	0	0.000189179	0.000158019	0.000134517	0.000105313	0.000243516	9.59e-05	9.2e-05	0.000151225	0.000116722	0.000381752	0.000168095	0.000154028	0.000122018	0.000154599	0.000395123
BLAST_GLGC_EUBE2 Glucose-1-phosphate adenylyltransferase OS=Eubacterium eligens (strain ATCC 27750 / VPI C15-48) GN=glgC PE=3 SV=1_C4Z4L8	0	5.75e-05	0	0.000232693	0	0.000228019	0.000106413	9.7e-05	0.000210578	0.000219744	0	0.000145751	0.000276192	0	0	0	0	0	0.000168805	0.00026434	0	3.73e-05	5.71e-05	0	7.7e-05	0.000542754	6.46e-05	0	0	0.000123294	0	5.98e-05	0.000288569	0.000174028	0.000126119	0	0.000269034	0.000105313	0.000304395	0.000191896	0.000337154	0.000100817	0.000194537	0.000190876	0.000112064	0.000256713	0	0.000618397	5.64e-05
BLAST_G1091_BACTN Glycosyl hydrolase family 109 protein 1 OS=Bacteroides thetaiotaomicron (strain ATCC 29148 / DSM 2079 / NCTC 10582 / E50 / VPI-5482) GN=BT_4243 PE=3 SV=1_Q89ZX8	0	0	0.000502702	0	0	0	0	0	0	0	0	4.86e-05	0	0.00109557	0	0.000683153	0	0	0.00033761	0	0	0	0.000285682	0	0.000500713	0	0	0	0.000260904	0	0	0.0002989	0	0.000174028	0	0	0	0	0	0.000415774	0.000459756	5.04e-05	0	0	0.000728414	0.000154028	0	0.00082453	0.000677354
Metagenome unknown	0	0	0	0	0	0.0011401	0	0	0	0	0	0	0	0	0	0	0	0.00271337	0	0	0	0.000484749	0	0	0	0	0	0	0	0.00102745	0	0	0	0	0	0	0.00094162	0	0	0	0	0	0.000972687	0	0	0.000154028	0	0	0
AROC_NOSS1 Chorismate synthase OS=Nostoc sp. (strain PCC 7120 / SAG 25.82 / UTEX 2576) GN=aroC PE=3 SV=1	0.000190186	0.000115075	0.000125676	0.000232693	0	9.12e-05	7.09e-05	0.000339624	0.000175482	0.000109872	0.000356633	0.000340086	9.21e-05	0	0	0.000273261	0.000197472	0.000370005	0.000168805	0.00026434	8.4e-05	7.46e-05	0.000171409	0.000121581	0.000154065	0.000197365	0.000193874	0.00011419	0.000130452	8.22e-05	0.000160711	0	0.000180356	0.000139222	6.31e-05	0	0	0.000210626	0.000243516	3.2e-05	9.2e-05	0.000151225	0.000116722	0.000190876	0.000112064	0.000102685	0.000183027	0.000154599	5.64e-05
RAD5_KLULA DNA repair protein RAD5 OS=Kluyveromyces lactis (strain ATCC 8585 / CBS 2359 / DSM 70799 / NBRC 1267 / NRRL Y-1140 / WM37) GN=RAD5 PE=3 SV=1	0.00014264	0.000115075	0.000251351	0.000232693	0.00013887	0.000136811	0.000106413	0.000194071	0.000105289	0.000164808	0.000475511	0.000145751	0.000276192	0.000322227	0.000371885	0.000136631	9.87e-05	0.00024667	0.00033761	0.00013217	0	7.46e-05	0.000114273	4.05e-05	7.7e-05	9.87e-05	6.46e-05	0.000152253	0	0.000123294	0.000214282	0.00023912	3.61e-05	0	0.000315298	0.000210693	0.000134517	0.000105313	0.000365275	9.59e-05	0.000122602	0.000201633	7.78e-05	0.000190876	0.000112064	0.000102685	0.000244036	0.000103066	0.000112892
PDC6_YEAST Pyruvate decarboxylase isozyme 3 OS=Saccharomyces cerevisiae (strain ATCC 204508 / S288c) GN=PDC6 PE=1 SV=3	0	0	0	0	0	0	0	0	0	0.000109872	0	0	0	0	0	0	0	0.000123335	0	0	0	3.73e-05	0	0	0	0	0	0	0	0	0.00262495	0	0.00115428	0	0.000252239	0.000210693	0	0	0	0.00182301	0.000306504	0	0.00143958	0.000190876	0	0	0	0	0
BLAST_UPP_CLONN Uracil phosphoribosyltransferase OS=Clostridium novyi (strain NT) GN=upp PE=3 SV=1_A0Q306	4.75e-05	0.000115075	0.00056554	0	0	0.00036483	0.000248297	0.000291107	0.000772119	0.000329616	0	0	0.000368256	0	0	0	0.000197472	0	0	6.61e-05	0.000125955	0.000410172	0	0.000283688	0	0.000345389	6.46e-05	0	8.7e-05	0	5.36e-05	0	7.21e-05	0.000487279	6.31e-05	0.000158019	0	5.27e-05	0.000304395	3.2e-05	0.000459756	0	0.00077815	0	5.6e-05	0.000359398	0	0.00066993	0
BLAST_TPIS_CLOB8 Triosephosphate isomerase OS=Clostridium beijerinckii (strain ATCC 51743 / NCIMB 8052) GN=tpiA PE=3 SV=1_A6LR06	0.000190186	0.000115075	0	0	4.63e-05	0.000136811	0.000354711	0.00043666	0.000280771	0.000109872	0	0.000145751	0	0.000257782	0.000371885	0.00109304	0.000296209	0.00024667	0.00033761	0.00026434	0	0	5.71e-05	0	0.000115549	0.000246706	0	0.000152253	4.35e-05	0	0.000589275	5.98e-05	0	0.000174028	0	0	0	0	6.09e-05	0.000351809	0.000183902	5.04e-05	7.78e-05	0	0.000112064	5.13e-05	0	0	0
Metagenome unknown	0.00014264	5.75e-05	0.000188513	0	0.00013887	0.000182415	7.09e-05	0.000194071	0.000105289	0.00027468	0.000356633	0.000145751	0	0.000128891	0.000371885	0.000273261	0	0.00049334	0.00033761	0.00013217	8.4e-05	0.000111865	0.000171409	0.000121581	0.000115549	0.000148024	0.000258498	0.000152253	0.000130452	0.000205491	0.000214282	0.00023912	7.21e-05	0	0	0	0.000134517	0	0.000365275	0.00012793	9.2e-05	0.000252042	7.78e-05	0	0.000168095	0.00020537	6.1e-05	0.000154599	0.000112892
BLAST_YOAA_BACSU Uncharacterized N-acetyltransferase YoaA OS=Bacillus subtilis (strain 168) GN=yoaA PE=3 SV=2_O34569	0	5.75e-05	6.28e-05	0.00034904	0	0	0.000141884	0	0.000105289	0	0.000356633	9.72e-05	9.21e-05	0.000128891	0	0.000273261	9.87e-05	0	0.000168805	6.61e-05	0	0	0.000342818	0.000202634	0.000115549	0	0.000258498	0.000190317	4.35e-05	0	0	0.0002989	0	3.48e-05	0.000126119	5.27e-05	0.000403551	0.000210626	0.000182637	9.59e-05	0.000153252	0.000100817	0.00015563	0.000763504	0.000168095	0.00020537	0.000183027	0.000206132	0.000112892
BLAST_NORV_PECCP Anaerobic nitric oxide reductase flavorubredoxin OS=Pectobacterium carotovorum subsp. carotovorum (strain PC1) GN=norV PE=3 SV=1_C6D9Q2	9.51e-05	0.000287687	0.000251351	0	9.26e-05	0.000182415	0.000177355	0.000242589	0.000140385	0.00027468	0.000356633	0.000242919	0	0.000257782	0.000185943	0.000136631	0.000296209	0	0	0.00026434	0	0.000111865	0	0.000162107	0	0.000197365	0.000129249	0	0	0	0.000107141	0.0002989	0.000144285	0.000139222	0	0	0	0.000105313	0.000365275	0	0.000183902	5.04e-05	0.000233445	0	0.000224127	0.00020537	0.000244036	0.000257666	0.000225785
BLAST_ILL1_ORYSI IAA-amino acid hydrolase ILR1-like 1 OS=Oryza sativa subsp. indica GN=ILL1 PE=2 SV=1_Q84XG9	0.00014264	0.000115075	0.000125676	0.00034904	9.26e-05	0.000136811	0.000141884	0.000145553	0.000140385	0.000219744	0.000475511	0.000145751	0	0.000193336	0	0.000136631	0.000394945	0.000123335	0.000168805	0.00026434	0	3.73e-05	0.000171409	8.11e-05	3.85e-05	0.000148024	0.000193874	0	0	8.22e-05	0	0.00017934	0.000108213	0.000104417	0.000252239	0	0	0.000210626	0.000182637	6.4e-05	0.000122602	0.000151225	3.89e-05	0.000572628	5.6e-05	0.000154028	0.000122018	0.000206132	0.000169338
Metagenome unknown	0.000713199	0	0	0	0	0	0	4.85e-05	0	0	0	0	0	0	0	0	0	0	0	0	0	0	0	0	0	0	0	0	0	0	0	0	0	0	0	0	0	0	0	0	0	0	0	0	0	0	0	0	0
BLAST_FTHS_AGARV Formate--tetrahydrofolate ligase OS=Agathobacter rectalis (strain ATCC 33656 / DSM 3377 / JCM 17463 / KCTC 5835 / VPI 0990) GN=fhs PE=3 SV=1_C4ZBG8	0.000237733	0.00023015	6.28e-05	0.000116347	9.26e-05	0.000182415	0.000141884	0.000242589	0.000140385	0.000109872	0.000237756	0.000194335	0.000276192	0.000257782	0.000557828	0.000683153	0.000197472	0.00049334	0.000506415	0.00013217	0	7.46e-05	0.000114273	0	7.7e-05	0.000148024	6.46e-05	0	0	0.000205491	0	0	0.000180356	0.000139222	0.000189179	0	0.000134517	0	6.09e-05	9.59e-05	0.000122602	0.000100817	3.89e-05	0.000190876	0.000168095	0.000154028	6.1e-05	0	0
BLAST_NORM_THEMA Probable multidrug resistance protein NorM OS=Thermotoga maritima (strain ATCC 43589 / MSB8 / DSM 3109 / JCM 10099) GN=norM PE=3 SV=1_Q9WZS2	0	5.75e-05	6.28e-05	0.000116347	9.26e-05	9.12e-05	0	0.000145553	0.000105289	0	0	0	0.000184128	0.000322227	0.000185943	0.000136631	0	0	0.000844024	0	0.000293895	0.000111865	0.000171409	4.05e-05	0.000269614	0	0	0.00011419	0.000130452	4.11e-05	0.000428564	5.98e-05	0.000180356	6.96e-05	0.000126119	0.000158019	0.000134517	0	0.000243516	0.00012793	0	0.000252042	3.89e-05	0.000190876	0.000504286	5.13e-05	0	0.000154599	0.000112892
BLAST_RPOA_BACTN DNA-directed RNA polymerase subunit alpha OS=Bacteroides thetaiotaomicron (strain ATCC 29148 / DSM 2079 / NCTC 10582 / E50 / VPI-5482) GN=rpoA PE=3 SV=1_Q8A4A2	0	5.75e-05	0.000377027	0	0	0.000456038	0.00031924	4.85e-05	3.51e-05	0	0	0	0	0	0	0	0	0.000616675	0	0.000198255	0	0.000857633	0.000228545	0.000243161	0	9.87e-05	0	0	0	4.11e-05	0	0	0.000108213	0.000661307	0.000252239	0	0.000134517	0	0	0.00012793	0.00116471	0.000201633	0.000817057	0	0	0.00020537	0.000244036	0.000154599	5.64e-05
Metagenome unknown	0	0	0	0	0.000601768	0.00036483	0.000425653	0	0	0	0	0	0	0	0	0	0	0.00123335	0	0	0	0.000410172	0	8.11e-05	0	0	0	0	0.000173936	0.000739767	0	0	0	0	0	0	0	0	0.0011567	0	0.000490406	0	0.00062252	0	0	0.000154028	0	0	0
BLAST_ADDA_CLOK1 ATP-dependent helicase/nuclease subunit A OS=Clostridium kluyveri (strain NBRC 12016) GN=addA PE=3 SV=1_B9DZK4	0.000190186	0.000172612	6.28e-05	0.000581734	0.00013887	0.000136811	0.000177355	0.000145553	0.000140385	0	0.000356633	0.000194335	0.000276192	0.000257782	0	0.000136631	0.000197472	0	0.000168805	0.00013217	0	0.000149154	0.000228545	0.000162107	0	4.93e-05	0.000193874	0.000266443	0.000173936	8.22e-05	5.36e-05	0.0002989	3.61e-05	0.000139222	0.000252239	0	0	0.000105313	0.000243516	3.2e-05	0.000153252	0.000100817	0.000116722	0	0.000168095	5.13e-05	0.000366055	0.000257666	0.000169338
RS4_AGARV 30S ribosomal protein S4 OS=Agathobacter rectalis (strain ATCC 33656 / DSM 3377 / JCM 17463 / KCTC 5835 / VPI 0990) GN=rpsD PE=3 SV=1	0.00137885	0.000345224	0	0.000465387	0.000231449	0.000319227	0.000212826	9.7e-05	0.000526445	0.00115366	0	0.000728757	0.000368256	0.0007089	0.000371885	0.000136631	0	0	0	0	0	0	0	0	0	0	0	7.61e-05	0	0	0.000107141	0	0	6.96e-05	0	0.000158019	0	0	0	0.000191896	3.07e-05	0	0	0.000190876	0.000560318	0	0.000488073	0.000515331	0
Metagenome unknown	0	0	0	0	9.26e-05	0	0	0	0	0	0	0	0	0	0	0	0	0	0	0	0	0	0	0	0	0	0	0	0	0	0	0	0	0	0	0	0	0	0	0.00339016	0.000582358	0	0	0	0	0	0	0	0
BLAST_Y366_HAEIN Uncharacterized protein HI_0366 OS=Haemophilus influenzae (strain ATCC 51907 / DSM 11121 / KW20 / Rd) GN=HI_0366 PE=3 SV=1_P43988	0	0	0	0.00034904	0	4.56e-05	0	0	3.51e-05	0.000164808	0.000594389	0	0	0	0	0	0	0.000123335	0.000168805	0.00013217	0.000293895	0	0.000342818	4.05e-05	0.000269614	0	0.000323123	0.000304507	4.35e-05	4.11e-05	0.000160711	0.0014945	0.000144285	3.48e-05	0.000126119	0.000210693	0.000134517	0.000105313	6.09e-05	0.000223878	0	0.000201633	7.78e-05	0	0.000112064	0	6.1e-05	0	0
Metagenome unknown	4.75e-05	0	0	0.000116347	4.63e-05	0	0.000106413	4.85e-05	3.51e-05	0	0.000118878	4.86e-05	0.000184128	0.000193336	0.000371885	0	0	0	0.000506415	0.00013217	0.000629776	3.73e-05	5.71e-05	0.000121581	3.85e-05	4.93e-05	0.000193874	7.61e-05	0.000260904	0	5.36e-05	0.00047824	7.21e-05	3.48e-05	0.000693656	0.000474058	0	0.000105313	0	9.59e-05	0	0.000151225	7.78e-05	0.000190876	0.000224127	0	6.1e-05	0	0
BLAST_GUNA_CALSA Endoglucanase A OS=Caldicellulosiruptor saccharolyticus GN=celA PE=3 SV=2_P22534	0	0	0	0	4.63e-05	0	0	0	0	0	0	0.00116601	0	0	0	0	0	0	0	0	0	0	0	0	0	0.0014309	0	0	0	0.000863061	0	0	0	0.00288887	0	0	0	0	0	0	0	0.000554491	0	0	0	0	0	0	0
BLAST_CYCB_BACSU Cyclodextrin-binding protein OS=Bacillus subtilis (strain 168) GN=cycB PE=1 SV=1_O07009	0	0	0.002325	0	0	0	0	0	0	0	0	0.00194335	0	0	0	0	0	0	0	0.00198255	0	0	0	0	0	0	0	0	0	0	0	0	0	0	0	0	0	0	0	0	0.00107276	0	0	0	0	0	0	0.000721464	0
Metagenome unknown	0.00028528	0.000345224	0	0	4.63e-05	0	0	9.7e-05	0	0	0.000118878	0.000194335	0	0	0.000371885	0.000273261	0	0	0.000168805	0	0.000125955	0	0	0	0.000462196	0	0	3.81e-05	0	8.22e-05	0	0	0	0.000278445	0	0	0	0	0	0.000511722	0	0.000806533	0	0	0.000112064	0	0	0.000103066	0
BLAST_PGK_CALS4 Phosphoglycerate kinase OS=Caldanaerobacter subterraneus subsp. tengcongensis (strain DSM 15242 / JCM 11007 / NBRC 100824 / MB4) GN=pgk PE=3 SV=1_Q8R965	0.000190186	0.000115075	0	0	4.63e-05	0.000136811	0.00031924	0.00174664	0.000280771	0.000109872	0	0.000145751	0	0.000257782	0.000371885	0.000956415	0.000592417	0.00024667	0.00033761	0.00013217	4.2e-05	0	5.71e-05	0	0.000115549	0.000246706	0	0	0	0	0	0	0	0.0012182	0	5.27e-05	0	0	0	0.00012793	0.000183902	0	0	0	0.000112064	0	0	0	0
Metagenome unknown	0.00014264	0.00023015	0.000188513	0.000465387	9.26e-05	4.56e-05	0.000212826	9.7e-05	0.000105289	0	0.000237756	4.86e-05	0	0.000193336	0	0	0.000394945	0.000123335	0.000506415	0.00013217	0	0	0	4.05e-05	0.000154065	9.87e-05	0.000129249	0.00011419	0.000130452	8.22e-05	0.000160711	0.00035868	7.21e-05	6.96e-05	0.000126119	0	0.000269034	0.000105313	0.000243516	9.59e-05	0.000153252	0.000201633	0.00015563	0.000190876	0.000112064	0.000154028	0	0.000206132	5.64e-05
BLAST_SBCD_RHOCB Nuclease SbcCD subunit D OS=Rhodobacter capsulatus (strain ATCC BAA-309 / NBRC 16581 / SB1003) GN=sbcD PE=3 SV=1_O68033	0	5.75e-05	0	0.00034904	0	0	0.000141884	0	0.000105289	0	0.000356633	9.72e-05	9.21e-05	0.000128891	0	0.000136631	9.87e-05	0	0.00033761	6.61e-05	0	0	0.000342818	0.000202634	0.000115549	0	0.000258498	0.000190317	4.35e-05	0	0	0.0002989	0	3.48e-05	0.000126119	5.27e-05	0.000403551	0.000210626	0.000182637	9.59e-05	0.000153252	0.000100817	0.00015563	0.000763504	0.000168095	0.000154028	0.000183027	0.000206132	0.000112892
BLAST_RL24_KOSOT 50S ribosomal protein L24 OS=Kosmotoga olearia (strain TBF 19.5.1) GN=rplX PE=3 SV=1_C5CGQ3	0	0.000287687	0.000439864	0	0	0.00036483	0.000177355	0.000194071	0.000210578	0.000329616	0	0.000194335	0.00046032	0.000128891	0	0	9.87e-05	0.000123335	0.000168805	0.00026434	0	0.000149154	0	0.000243161	0	0.000246706	0.000129249	0	0	0	0	0.00035868	7.21e-05	0.000174028	0.000378358	0	0	0.000210626	0.000365275	0	3.07e-05	0.000100817	0.000194537	0	0.000280159	0.000410741	0.000305045	0.000257666	0.000225785
RS13_ARCB4 30S ribosomal protein S13 OS=Arcobacter butzleri (strain RM4018) GN=rpsM PE=3 SV=1	9.51e-05	0.00023015	0.000188513	0.00034904	0.00013887	9.12e-05	0.000177355	0.000242589	0.000175482	0	0.000594389	0.000194335	0.000368256	0.000193336	0	0.000136631	9.87e-05	0	0	0.00026434	0	0.000149154	0	0.000162107	0	0.000148024	0.000193874	7.61e-05	0	8.22e-05	0.000107141	0.00035868	0.000108213	0.000139222	0.000189179	0	0	5.27e-05	0.000243516	0	0.000153252	0.000151225	0.000194537	0	0.000112064	0.000102685	0.000244036	0.000257666	5.64e-05
Metagenome unknown	9.51e-05	0.00023015	0.000251351	0.000581734	4.63e-05	9.12e-05	0.000141884	0.000194071	0.000105289	0.000164808	0.000594389	0.000242919	0.000276192	0.000193336	0	0.000273261	0.000197472	0.000370005	0.00033761	0.00013217	0	0	0.000114273	4.05e-05	3.85e-05	9.87e-05	0.000258498	0.00011419	4.35e-05	8.22e-05	0	0.00023912	7.21e-05	0.000104417	0.000252239	5.27e-05	0	0.000210626	0.000243516	6.4e-05	9.2e-05	0	7.78e-05	0.000190876	0.000112064	5.13e-05	0.000122018	0.000206132	0
BLAST_PSF1_BACPU 4-phosphopantetheinyl transferase psf-1 OS=Bacillus pumilus GN=psf-1 PE=3 SV=1_P55810	0.00014264	0.000115075	0.000188513	0.000116347	0.00013887	0.000136811	0.000141884	0.000145553	3.51e-05	0.000164808	0.000475511	0	0.000276192	6.44e-05	0.000185943	0	0.000394945	0.000370005	0.000168805	6.61e-05	0.00016794	7.46e-05	0.000171409	0.000121581	0.000154065	4.93e-05	0.000129249	0	0.000130452	0	0.000267852	5.98e-05	0.000360711	0.000104417	0.000378358	0.000158019	0	0.000105313	0.000121758	0	0	0.000201633	0.000116722	0.000381752	0.000224127	0.000102685	6.1e-05	0.000103066	0.000169338
OVALY_CHICK Ovalbumin-related protein Y OS=Gallus gallus GN=SERPINB14B PE=1 SV=1	0	0	0.000816891	0	0	4.56e-05	0	0.000242589	0	0	0	0	0	0	0	0	0	0	0	0	0	3.73e-05	0	0	0	0	0	0.00022838	0	0	0	0	0.00032464	0	0	0.00121148	0	0	0	0.000287843	0.00104211	0	0	0	0	0	0	0	0.000112892
EFTU_RECAM Elongation factor Tu, mitochondrial OS=Reclinomonas americana GN=TUFA PE=3 SV=1	0	0.000287687	0.000439864	0	0	0.000136811	0	0.000194071	0	0.000164808	0	0.000194335	0	0	0	0	0	0	0	0	0	0.000447461	0.000342818	0.000121581	0.000154065	0.000542754	0.000323123	0.000190317	0.000434839	0	0	0	3.61e-05	0.000139222	0	0	0	0	0	0.000383791	0.000490406	0	0.000116722	0	0	0.00020537	0	0.000103066	0
BLAST_YQGS_BACSU Lipoteichoic acid synthase-like YqgS OS=Bacillus subtilis (strain 168) GN=yqgS PE=3 SV=2_P54496	0.00014264	0.000115075	0.000188513	0	4.63e-05	0.000136811	0.000106413	4.85e-05	0.000140385	0.000109872	0.000118878	9.72e-05	0	0.000128891	0	0	0	0.000123335	0.000168805	0.000198255	0.00016794	0.000111865	0.000228545	0.000202634	0.000154065	0	0.000258498	0.000152253	0.000173936	0.000246589	5.36e-05	0.00023912	0.000108213	0	0	0.000158019	0	0.00015797	0.000243516	9.59e-05	9.2e-05	0.000201633	0.000116722	0.000190876	0.000168095	0.00020537	0.000122018	0.000154599	0.000282231
BLAST_CRT_CLODI Short-chain-enoyl-CoA hydratase (Fragment) OS=Clostridioides difficile GN=crt PE=3 SV=1_P45361	0	0.000402762	0.000251351	0	0	0.000410434	0.000212826	0.000291107	0.00038606	0.000329616	0	0.000291503	0.000736513	0	0	0.000273261	0.000592417	0.000123335	0.000168805	0.00013217	0	7.46e-05	0	8.11e-05	0	0.000345389	0	0	0	0	0	0.00023912	0	0.000243639	0.000189179	0	0.000134517	0.00015797	0.000365275	0	0.000214553	0	0.00015563	0	0.000112064	5.13e-05	0.000305045	0.000206132	0.000112892
BLAST_ACEA_SALTY Isocitrate lyase OS=Salmonella typhimurium (strain LT2 / SGSC1412 / ATCC 700720) GN=aceA PE=3 SV=2_P51066	0	0	0	0	0	0	0	0.00223182	0	0	0	0	0	0	0	0	0	0	0	0	0	0	0	0	0.000654778	0	0	0	0	0	0	0	0	0	0	0	0	0	0	0	0	0	0	0	0	0	0	0	0
BLAST_Y1812_MYCTU NADH dehydrogenase-like protein Rv1812c OS=Mycobacterium tuberculosis (strain ATCC 25618 / H37Rv) GN=Rv1812c PE=1 SV=1_P9WJJ1	9.51e-05	0.000115075	0.000125676	0.00034904	9.26e-05	0.000136811	0.000106413	9.7e-05	0.000105289	0.000164808	0.000475511	0.000145751	0.000368256	0.000193336	0.000185943	0.000273261	9.87e-05	0.000123335	0	0.00013217	8.4e-05	7.46e-05	0.000285682	8.11e-05	0.000115549	9.87e-05	0.000193874	0.000152253	0.00021742	0	0.000214282	0.00017934	3.61e-05	0	0.000378358	0.000158019	0	0.000105313	0.000304395	6.4e-05	9.2e-05	0.000201633	0.00015563	0.000190876	0.000112064	0.00020537	0.000122018	5.15e-05	0.000112892
Metagenome unknown	0.000332826	0	0	0	0.000370319	0	0.000141884	9.7e-05	0	0.000109872	0	4.86e-05	0	0.000257782	0.000371885	0.000683153	9.87e-05	0	0.000506415	0	0.000377865	0.000111865	0.000342818	0.000364742	0.000154065	0.000148024	0.000258498	0.00011419	0.000260904	0.000164393	0.000321423	0.00011956	0.000144285	0	0	0.000158019	0	0	0	0.00012793	0	0	0.000116722	0.000381752	0	0.000154028	6.1e-05	0.000103066	0.000338677
Metagenome unknown	0	0	0	0.00104712	9.26e-05	0	0.000106413	0.0016496	0	0	0.0042796	0	0	0	0	0	0	0	0	0	0	0	0.000171409	0.000283688	0	0	0	0	0	8.22e-05	0	0	0	0.00031325	0	0	0.000134517	0	0	0	0	0.000151225	0	0	0	0	0.000183027	0	0.000338677
Metagenome unknown	9.51e-05	0	0	0	0	0	0	0	0	0	0.000237756	0	0	0	0	0.000136631	0	0	0.000168805	0	8.4e-05	0.000149154	0.000342818	0.000121581	0.000192582	0	0.000129249	0.000152253	0.000173936	0	0.000107141	0.00023912	0.000144285	0	0	5.27e-05	0.000134517	0.000263283	0.000304395	0.000191896	9.2e-05	0.000100817	0.00015563	0.000954381	0.000224127	0.000256713	0.000122018	0.000103066	0.000169338
HBA_LAMVI Hemoglobin subunit alpha OS=Lama vicugna GN=HBA PE=1 SV=1	0	0	0	0	0	0	0	0	0	0	0	0	0	0	0	0	0	0	0	0	0	0	0	0.00174266	0	0	0	3.81e-05	0	0	0	0	3.61e-05	0	0	0	0	0	0	0	0	0	0	0	0	0	0	0	0.000564462
EF1A_CHICK Elongation factor 1-alpha 1 OS=Gallus gallus GN=EEF1A PE=2 SV=1	4.75e-05	0.000172612	0.000125676	0	0	0.000182415	0	0	0	0	0	0	0	0	0.000185943	0	0	0.000123335	0	0	8.4e-05	0.000149154	0	0.000162107	0.000346647	0	0	7.61e-05	0	0	0.000535705	0	0.000865707	0.000104417	0	0	0.000134517	0	0.000243516	0.0007356	0.000490406	5.04e-05	0.000894872	0	0.000672382	0	0	0.000257666	0
BLAST_GSA_CAMJD Glutamate-1-semialdehyde 2,1-aminomutase OS=Campylobacter jejuni subsp. doylei (strain ATCC BAA-1458 / RM4099 / 269.97) GN=hemL PE=3 SV=1_A7H3N1	0	0.000172612	0.000502702	0	0	0	0	0	0	0	0	0	0	0	0	0	0	0.00074001	0.000168805	0	0	0.000149154	0.000171409	0.000162107	0	0	0	0	0	0	0	0	0.000108213	0	0.000126119	0	0	0.00358064	0.000304395	0	0	0	0	0	0.000224127	0.00189968	0	0.00066993	0
BLAST_YQXC_BACSU Putative rRNA methyltransferase YqxC OS=Bacillus subtilis (strain 168) GN=yqxC PE=3 SV=3_P19672	4.75e-05	0	6.28e-05	0.000116347	0.000185159	9.12e-05	7.09e-05	0	0	0	0	0	0.000184128	0.000128891	0	0	9.87e-05	0.000123335	0	0.000198255	0.000587791	0	0.000342818	8.11e-05	7.7e-05	9.87e-05	0.000193874	0.000190317	8.7e-05	0.000164393	0.000107141	0.00023912	0	0	6.31e-05	0.000105346	0	0.00015797	0	0.000191896	0.000183902	0.000201633	7.78e-05	0.000381752	5.6e-05	0.00020537	0	0	0
BLAST_ARAA_BACTN L-arabinose isomerase OS=Bacteroides thetaiotaomicron (strain ATCC 29148 / DSM 2079 / NCTC 10582 / E50 / VPI-5482) GN=araA PE=3 SV=1_Q8AAW1	0	0	0	0	0.000231449	0.000501642	0.000390182	0	0	0	0	0	0	0	0	0	0	0.00234337	0	0	0	0.00108136	0	0.000486322	0	0	0	0	0.000173936	0	0	0.00017934	0	0	0	0	0	0	0.000182637	0	0.00076626	0	0.000661427	0	0	0.000718797	0	0.000206132	0
SYA_ACICJ Alanine--tRNA ligase OS=Acidiphilium cryptum (strain JF-5) GN=alaS PE=3 SV=1	0.00014264	5.75e-05	0.000251351	0.000232693	0.000277739	0.000182415	0.000177355	0.000194071	0.000105289	0.00027468	0.000237756	0.000194335	0.000184128	0.000322227	0.000743771	0.000819784	0.000296209	0.000616675	0.000168805	0.00013217	4.2e-05	7.46e-05	0.000114273	0	3.85e-05	0	0	3.81e-05	0	8.22e-05	5.36e-05	5.98e-05	3.61e-05	6.96e-05	0.000126119	0	0.000269034	0	0.000182637	9.59e-05	0.000122602	5.04e-05	7.78e-05	0	0.000392223	5.13e-05	6.1e-05	0.000103066	0.000112892
BLAST_RHTA_RHIME Rhizobactin receptor OS=Rhizobium meliloti (strain 1021) GN=rhtA PE=3 SV=1_Q9Z3Q5	0.00014264	5.75e-05	0.000125676	0	9.26e-05	4.56e-05	0.000141884	4.85e-05	7.02e-05	0	0.000237756	9.72e-05	9.21e-05	0.000257782	0.000371885	0.000409892	0.000197472	0.00024667	0.000506415	0.00026434	0.000125955	0	0.000228545	0	0	9.87e-05	6.46e-05	7.61e-05	0	4.11e-05	0.000107141	0.00011956	0.000108213	0	0.000126119	0	0.000134517	0.000105313	6.09e-05	0	0	0.000100817	7.78e-05	0	0.000168095	0.00020537	6.1e-05	0	5.64e-05
BLAST_PRTN3_HUMAN Myeloblastin OS=Homo sapiens GN=PRTN3 PE=1 SV=3_P24158	0	5.75e-05	0	0	4.63e-05	0	0	0	7.02e-05	5.49e-05	0	4.86e-05	9.21e-05	0	0	0	0	0	0	0	0.000461836	0	0	4.05e-05	0.000115549	0	6.46e-05	0	0.000391355	0	0.00112498	0	0.00194784	0	0	0	0	0	0	0	0	0	0.000194537	0.000190876	0	0	0	5.15e-05	0.000790246
BLAST_G3P_STRP8 Glyceraldehyde-3-phosphate dehydrogenase OS=Streptococcus pyogenes serotype M18 (strain MGAS8232) GN=gap PE=3 SV=2_P68777	0	0	0.000125676	0	0	0	0	0	0.000315867	0	0	0	0	0	0	0	0	0	0	0	0.00109161	0	0	0	0.000231098	0	0	0	0	0.000986355	0	0	7.21e-05	0	0	0.000158019	0	0	0.00152198	0	0	0	0	0	0	0	0	0	0.000225785
Metagenome unknown	0.00014264	0.000172612	0.000188513	0.00104712	0.000324029	9.12e-05	7.09e-05	4.85e-05	7.02e-05	0.000164808	0.000237756	0.000145751	0.00046032	0.000128891	0	0.000136631	0.000394945	0	0	0.00026434	0.00016794	0	0	0.000121581	0	0	0.000258498	0.000190317	0.00021742	8.22e-05	0.000160711	0.00035868	3.61e-05	6.96e-05	0.000252239	5.27e-05	0	0.000105313	0.000182637	3.2e-05	9.2e-05	0	3.89e-05	0.000190876	0	0	6.1e-05	0	0
BLAST_YVZB_BACSU Putative flagellin YvzB OS=Bacillus subtilis (strain 168) GN=yvzB PE=1 SV=1_O34366	0	0	0.00169662	0	0	0	0	0	0	0	0	0	0	0	0	0	0	0	0	0	0	0	0	0	0	0	0	0	0	0.000246589	0	0	0	0	0	0	0	0	0	0	0	0	0	0	0	0	0	0	0
BLAST_PUR9_CALS8 Bifunctional purine biosynthesis protein PurH OS=Caldicellulosiruptor saccharolyticus (strain ATCC 43494 / DSM 8903 / Tp8T 6331) GN=purH PE=3 SV=1_A4XKZ2	0.000190186	0.000115075	6.28e-05	0.000232693	0.000601768	0.000319227	0.000957719	9.7e-05	0.000175482	0.000164808	0.000118878	9.72e-05	9.21e-05	0.000193336	0	0.000136631	0	0.000616675	0.000168805	0	0	0.000708479	0.000114273	0	0	0.000148024	0	0	0	0	0	0	0	3.48e-05	6.31e-05	0	0	0	0.000304395	0.000191896	0.000398455	0	0.000427982	0	0	0.000308056	0.000183027	0	0
RS1_MYCTU 30S ribosomal protein S1 OS=Mycobacterium tuberculosis (strain ATCC 25618 / H37Rv) GN=rpsA PE=1 SV=1	0	0.000690449	0.000251351	0	0.000925797	0.000136811	0.00124149	0.000145553	0.000737023	0	0	0	0.000644449	0.000773345	0	0	0	0	0	6.61e-05	0	0	0.000399954	0	0	0.000246706	0.000323123	0	0	0	0	0.00011956	0.000252498	0	0.000378358	0	0	0.000263283	0	0	0	0	0	0	0	0	0	0	0
BLAST_RPOA_CLOTH DNA-directed RNA polymerase subunit alpha OS=Clostridium thermocellum (strain ATCC 27405 / DSM 1237 / NBRC 103400 / NCIMB 10682 / NRRL B-4536 / VPI 7372) GN=rpoA PE=3 SV=1_A3DJK1	0.00014264	0.000115075	0.000188513	0.000465387	0	4.56e-05	0.000106413	0.000145553	0.000737023	0.000164808	0.000237756	0.000194335	0.000184128	0	0	0.000136631	0.000394945	0.00024667	0	6.61e-05	0	3.73e-05	5.71e-05	4.05e-05	0	0.000690778	0	0	4.35e-05	0.000164393	0	5.98e-05	7.21e-05	0.000174028	0	0	0	0	0.000121758	0	0.000275854	5.04e-05	3.89e-05	0	0	0.000102685	0.000427064	0.000412265	0
Metagenome unknown	0	0	0	0	0	0	0.000106413	0	3.51e-05	0	0	0	9.21e-05	0.000193336	0	0	0	0	0	0.000925192	8.4e-05	0.000372884	5.71e-05	0	0	0	0.0029081	0.000304507	0	0	0	0	0	0	6.31e-05	0	0	0	0	0	0	0	0	0	0	0	0	0	0
BLAST_Y1794_CLOTE UPF0261 protein CTC_01794 OS=Clostridium tetani (strain Massachusetts / E88) GN=CTC_01794 PE=3 SV=2_Q893M2	9.51e-05	0	0.000125676	0	0.00013887	0	3.55e-05	0	0.000105289	0	0	0	0	0.000128891	0.000557828	0.000136631	0.000296209	0.000123335	0.00033761	0.000198255	0.00025191	0	0.000114273	0	0.000308131	0	0.000258498	0.000304507	0	8.22e-05	0.000214282	0.00023912	0.000108213	0	0.000252239	0.000263366	0	5.27e-05	0	0.000383791	0	0.000151225	0.000116722	0.000763504	0.000112064	0.000154028	0.000122018	0.000206132	0
Metagenome unknown	0.000475466	5.75e-05	0	0	4.63e-05	9.12e-05	3.55e-05	0.000194071	0.000315867	0.00027468	0	0.000631589	0	6.44e-05	0	0.000546523	0.000296209	0.000123335	0.000675219	0	0	0	0	0	0	0.000838802	0	0	0	0	0	0	3.61e-05	0.000243639	0	0	0	0	0	0	0.000122602	0	0	0.000190876	0.000672382	0	0.000122018	0	0
Metagenome unknown	0.00118866	0.000517837	6.28e-05	0.00069808	0.000277739	0.000136811	0.000212826	0.000194071	0.000105289	0.00027468	0	0.000485838	9.21e-05	0.000322227	0.000371885	0.000136631	0	0	0	0	0	0	0	0	0.000154065	0	0	0	4.35e-05	0	0.000214282	5.98e-05	0	0.000104417	0.000189179	0.000579405	0	0.000210626	6.09e-05	0.000543704	0	0.000151225	0	0	0.000224127	0.000154028	0.000244036	0	0
BLAST_O16G_BACF5 Oligo-1,6-glucosidase OS=Bacillus sp. (strain F5) GN=malL PE=1 SV=2_P29093	9.51e-05	0.00023015	0.000125676	0.00069808	0.000185159	9.12e-05	0.000212826	0.000145553	0.000175482	0	0.000356633	0.000194335	9.21e-05	0.000257782	0	0	9.87e-05	0	0.000168805	0.00013217	0	0.000111865	0	0.000121581	0	0	0.000193874	3.81e-05	0	8.22e-05	0.000107141	0.00035868	7.21e-05	0.000174028	0.000252239	0	0	5.27e-05	0.000243516	0	0.000153252	5.04e-05	0.00015563	0	5.6e-05	0.000102685	0.000183027	0.000154599	0.000225785
BLAST_MALE_PYRAB Maltotriose-binding protein OS=Pyrococcus abyssi (strain GE5 / Orsay) GN=malE PE=3 SV=1_Q9V297	0	0.000287687	0	0.00034904	0.00106467	0	0.000957719	0	0.000807216	0	0	0	9.21e-05	0.000580009	0	0	0.000197472	0.00308337	0	0	0	0	0.000342818	0	0	0	0	0.00011419	0	0	0	0	0.00108213	0	0	0	0	0	0	0	0	0	0	0	0	0	0	0	0
BLAST_ACDB1_PYRFU Acetate--CoA ligase [ADP-forming] I subunit beta OS=Pyrococcus furiosus (strain ATCC 43587 / DSM 3638 / JCM 8422 / Vc1) GN=acdBI PE=1 SV=1_E7FHP1	0.000380373	0.000172612	0.000251351	0	0.000740638	0.000182415	0.000212826	9.7e-05	3.51e-05	0.000219744	0.000118878	0.000145751	0	0.000128891	0	0.000273261	9.87e-05	0.000123335	0.000168805	6.61e-05	0.0011336	0	0	0	0.000231098	0	6.46e-05	0.000190317	0.00126103	0	0.000267852	5.98e-05	7.21e-05	6.96e-05	0	5.27e-05	0	0	0.000304395	0.000767582	3.07e-05	5.04e-05	7.78e-05	0	5.6e-05	0	0	5.15e-05	0
Metagenome unknown	0.000237733	0.000115075	0.000251351	0.00034904	0.000277739	0.000182415	0.000177355	0.000194071	7.02e-05	0.00027468	0.000237756	0.000194335	0.000184128	0.000386673	0.000743771	0.000409892	0.000296209	0.000616675	0	6.61e-05	4.2e-05	7.46e-05	0.000114273	0	3.85e-05	0	0	3.81e-05	0	8.22e-05	5.36e-05	5.98e-05	3.61e-05	0.000104417	0.000126119	0	0.000134517	0	0.000182637	9.59e-05	0.000122602	0	7.78e-05	0	0.000392223	5.13e-05	0.000244036	0.000206132	0.000112892
Metagenome unknown	4.75e-05	0.000115075	0	0.00034904	0.000231449	0	3.55e-05	4.85e-05	0.000105289	0	0	4.86e-05	0.000184128	6.44e-05	0	0.000136631	0.000197472	0	0	0	0.00033588	0	0.000342818	0.000121581	0.000154065	4.93e-05	0.000193874	0.000266443	0.000260904	0.000123294	0.000160711	0.00011956	0.000360711	0	0.000126119	0.000105346	0	0.000105313	0.000121758	0.000255861	6.13e-05	0	0.000116722	0.000190876	0.000224127	0.000102685	0	0	5.64e-05
BLAST_GLNQ_GEOSE Glutamine transport ATP-binding protein GlnQ OS=Geobacillus stearothermophilus GN=glnQ PE=2 SV=1_P27675	0.00014264	0.00023015	6.28e-05	0.000465387	9.26e-05	0.000182415	0.000141884	0.000194071	0.000105289	0.000219744	0.000237756	0.000242919	0.00046032	0.000193336	0.000557828	0.000546523	0.000296209	0.00024667	0.000506415	0.00026434	0	0	0.000228545	0	3.85e-05	0.000148024	6.46e-05	7.61e-05	0	4.11e-05	0	0.00011956	0.000108213	0.000104417	6.31e-05	0.000105346	0	0.000105313	0.000121758	0	9.2e-05	0	0	0.000190876	0.000168095	0.00020537	6.1e-05	0.000206132	0
BLAST_PYRG_FLAPJ CTP synthase OS=Flavobacterium psychrophilum (strain JIP02/86 / ATCC 49511) GN=pyrG PE=3 SV=1_A6H0U1	9.51e-05	5.75e-05	0	0.00034904	4.63e-05	4.56e-05	3.55e-05	4.85e-05	7.02e-05	5.49e-05	0.000356633	0	0	6.44e-05	0.000185943	0.000273261	0	0.000123335	0.000168805	0.00013217	0.000293895	0.000186442	0.000228545	4.05e-05	0.000115549	9.87e-05	0.000193874	0.00011419	8.7e-05	8.22e-05	0.000160711	5.98e-05	0.000216427	0	0.000189179	0.000158019	0.000403551	0.000105313	0	9.59e-05	0	0.000100817	3.89e-05	0.000572628	0.000168095	5.13e-05	6.1e-05	5.15e-05	0.000112892
BLAST_TUAA_BACSU Putative undecaprenyl-phosphate N-acetylgalactosaminyl 1-phosphate transferase OS=Bacillus subtilis (strain 168) GN=tuaA PE=2 SV=1_O32274	0.00014264	5.75e-05	6.28e-05	0.000232693	0.000185159	4.56e-05	3.55e-05	9.7e-05	0	0	0.000118878	4.86e-05	0.000184128	0	0	0	0	0	0.000168805	0	0.000629776	3.73e-05	0	0	0	0	0.000129249	0	0.000304388	0	5.36e-05	0.00065758	7.21e-05	6.96e-05	0.000882835	0.000158019	0	0.00015797	0.000121758	9.59e-05	6.13e-05	0.000201633	3.89e-05	0.000190876	5.6e-05	0.000102685	0.000122018	5.15e-05	5.64e-05
Metagenome unknown	0.00014264	0.000172612	0.000314189	0	0.000370319	0.000136811	0.000212826	0.000145553	0.000175482	0.000164808	0.000356633	0.000340086	0	0.000193336	0	0.000273261	0	0	0.000675219	0	0.000797716	0	0	0	0.000269614	9.87e-05	6.46e-05	3.81e-05	0.000478323	0	0.000160711	0.00011956	0.000108213	0.000174028	0	0.000105346	0	0	0	0.000703617	3.07e-05	0	3.89e-05	0.000190876	0.000112064	5.13e-05	6.1e-05	0.000154599	0
BLAST_GUAA2_BACTN Putative GMP synthase [glutamine-hydrolyzing] 2 OS=Bacteroides thetaiotaomicron (strain ATCC 29148 / DSM 2079 / NCTC 10582 / E50 / VPI-5482) GN=guaA2 PE=5 SV=1_Q8A525	0.00014264	0.000115075	0	0.000814427	0.000185159	4.56e-05	0.000177355	9.7e-05	0	5.49e-05	0	0.000145751	0.000828577	0.000322227	0.000185943	0	9.87e-05	0	0	6.61e-05	0	0	5.71e-05	4.05e-05	0.000231098	0	0.000258498	0.000152253	0.000130452	0.000123294	0.000214282	0.00017934	0.000144285	3.48e-05	0.000189179	0.000368712	0	0.000368596	0.000182637	0.000223878	0	0.000151225	0	0.000190876	5.6e-05	0	0.000366055	0.000103066	0.000169338
Metagenome unknown	0	0.00109321	0	0.000116347	0.000370319	0.000273623	0.00117055	0.000291107	0.000105289	0.000219744	0	0	0.000920641	0.00167558	0	0	0	0	0	0	0	0	0.000399954	0	0	0	0	0	0	0	0	0	0.000793565	0	0.00126119	0	0	5.27e-05	0	0	0	0.000151225	0	0	0	0	0	0	0
Metagenome unknown	9.51e-05	0.000402762	0.000188513	0.000930774	9.26e-05	9.12e-05	0.000141884	0	0.000105289	0.00027468	0.000475511	0.000291503	0.00046032	0.000451118	0	0	0.000296209	0	0	0.000330426	0	0	0.000285682	4.05e-05	0	4.93e-05	0.000193874	0	0	8.22e-05	0	0.00011956	3.61e-05	0.000208834	0.000126119	0	0	0.000263283	0.000182637	0	6.13e-05	0.000151225	0	0.000190876	0	0.000154028	0.000244036	0.000154599	0.000112892
BLAST_MURD_CLOTH UDP-N-acetylmuramoylalanine--D-glutamate ligase OS=Clostridium thermocellum (strain ATCC 27405 / DSM 1237 / NBRC 103400 / NCIMB 10682 / NRRL B-4536 / VPI 7372) GN=murD PE=3 SV=1_A3DE94	0.00014264	0.000172612	0.000251351	0.00034904	9.26e-05	0.000182415	0.000177355	4.85e-05	0.000105289	0.000164808	0.000356633	0.000145751	0	0.000257782	0.000371885	0.000273261	0.000296209	0.000370005	0.000506415	0.00026434	0	0	0.000228545	4.05e-05	0	0.000197365	0	0	0	0.000123294	0	0.00023912	3.61e-05	0.000174028	0.000252239	0	0.000269034	0	6.09e-05	0	9.2e-05	0.000151225	7.78e-05	0.000381752	0	0.00020537	6.1e-05	0.000103066	0.000169338
BLAST_ADDB_NATTJ ATP-dependent helicase/deoxyribonuclease subunit B OS=Natranaerobius thermophilus (strain ATCC BAA-1301 / DSM 18059 / JW/NM-WN-LF) GN=addB PE=3 SV=1_B2A611	9.51e-05	0.000402762	0.000251351	0.00034904	0.00013887	0.000136811	0.000141884	0.000145553	7.02e-05	0.000164808	0.000237756	0.000194335	0	0.000128891	0	0.000136631	0.000296209	0.000123335	0	6.61e-05	0.00016794	0	0.000114273	8.11e-05	7.7e-05	9.87e-05	6.46e-05	7.61e-05	0	0.000164393	0.000160711	0.00017934	3.61e-05	6.96e-05	0.000126119	0.000158019	0	0.00015797	0.000243516	0	9.2e-05	5.04e-05	3.89e-05	0	0.000168095	0.000102685	0.000183027	0.000154599	0.000112892
Metagenome unknown	0	0	0.000251351	0	0	0	0.00166714	0	0	0	0	0.00111743	0	0	0	0	0	0	0	0	0	0	0	0	0	0.000197365	0	0	0	0.000164393	0	0	0	0.000174028	0	0	0.000538068	0	0	0.00012793	0.000950162	0	0.000700335	0	0	0	0.000427064	0	0
BLAST_IDNO_ECOLI 5-keto-D-gluconate 5-reductase OS=Escherichia coli (strain K12) GN=idnO PE=1 SV=1_P0A9P9	4.75e-05	0.000172612	0.000251351	0	9.26e-05	0.000182415	0.000141884	0.000242589	0.000140385	0.000164808	0	0.000145751	0.000368256	0	0.000185943	0.000273261	0.000296209	0.000123335	0.000506415	0.000198255	0	7.46e-05	0.000114273	0.000121581	0.000115549	0.000148024	0.000193874	0.00011419	0	0.000123294	5.36e-05	0	0.000108213	0.000104417	0.000189179	0	0.000134517	0.000105313	0.000182637	0	9.2e-05	0.000100817	0.000116722	0	5.6e-05	0.00020537	0.000244036	0.000154599	5.64e-05
BLAST_P60_LISWE Probable endopeptidase p60 OS=Listeria welshimeri GN=iap PE=3 SV=1_Q01839	0.000190186	0.00023015	0.000251351	0.000465387	0.00013887	0.000136811	0.000177355	0.000145553	0.000140385	0.000164808	0.000237756	0.000145751	0.00046032	0.000257782	0.000185943	0.000273261	0.000197472	0.00024667	0	0.00026434	0	0	0.000285682	4.05e-05	0	0.000148024	6.46e-05	0	0	0.000123294	0	0.00023912	7.21e-05	0.000104417	0.000252239	0	0.000269034	0	0.000121758	0	9.2e-05	5.04e-05	7.78e-05	0.000381752	0	0.00020537	0.000244036	0.000154599	0.000169338
BLAST_LIPO_BACSU Lipoprotein LipO OS=Bacillus subtilis (strain 168) GN=lipO PE=1 SV=1_P37966	0	0	0	0	0	0	0	0	0	0	0	0.000631589	0	0	0	0.000546523	9.87e-05	0	0	0	0	0	0	0.000405268	0	0.00039473	0	0	0	0	0	0	0	0	0.000126119	0	0	0	0.00237428	0	0	0	0	0	0	0	0.000610091	0.00108219	0
BLAST_RL15_AGARV 50S ribosomal protein L15 OS=Agathobacter rectalis (strain ATCC 33656 / DSM 3377 / JCM 17463 / KCTC 5835 / VPI 0990) GN=rplO PE=3 SV=1_C4ZBT7	0	0.000460299	0	0	0	0.000319227	0	0.000339624	0.000175482	0.00104378	0.000475511	0.000194335	0	0.000322227	0.000185943	0	0.000493681	0.00024667	0.000168805	0.00013217	0	7.46e-05	0	4.05e-05	0	0.00039473	0.000129249	0	8.7e-05	0	0	0	3.61e-05	6.96e-05	0	5.27e-05	0	0	0	0	0.000214553	0	7.78e-05	0.000190876	0	0.000410741	0	0.000566864	0
BLAST_PUR9_BACTN Bifunctional purine biosynthesis protein PurH OS=Bacteroides thetaiotaomicron (strain ATCC 29148 / DSM 2079 / NCTC 10582 / E50 / VPI-5482) GN=purH PE=3 SV=1_Q8A155	0	0	0.000125676	0	0	9.12e-05	0.000283768	0	0	0	0	9.72e-05	0	0.000128891	0.000185943	0.000136631	0	0.00049334	0	0.000462596	0	0.00022373	0.000171409	0.000324215	7.7e-05	0.000296048	0	0	0	0	0	0.00011956	0	0.000452473	0.000252239	0	0.000807103	0.000105313	6.09e-05	0	0.000429106	0.000201633	0.000233445	0	0	0.000308056	0.000244036	0	0
BLAST_RECJ_THET8 Single-stranded-DNA-specific exonuclease RecJ OS=Thermus thermophilus (strain HB8 / ATCC 27634 / DSM 579) GN=recJ PE=1 SV=1_Q5SJ47	4.75e-05	0	0	0.000116347	0	0	0	4.85e-05	0	0	0	0	0	6.44e-05	0.000185943	0.000136631	9.87e-05	0.000123335	0.000675219	6.61e-05	0.000503821	0	0.000171409	4.05e-05	3.85e-05	0	6.46e-05	0	0	4.11e-05	0	0.00035868	0	0	0.000315298	0.000158019	0	0	6.09e-05	6.4e-05	0	0.000151225	3.89e-05	0.000381752	0.000168095	5.13e-05	0	0	0
BLAST_TREC_ECOLI Trehalose-6-phosphate hydrolase OS=Escherichia coli (strain K12) GN=treC PE=1 SV=3_P28904	0.00014264	0.00023015	6.28e-05	0.00034904	9.26e-05	9.12e-05	7.09e-05	0.000145553	0.000105289	0.000219744	0.000356633	0.000145751	0.00046032	0.000193336	0	0.000273261	0.000394945	0	0.000168805	6.61e-05	0	7.46e-05	0.000171409	0	7.7e-05	0.000197365	6.46e-05	0	4.35e-05	8.22e-05	5.36e-05	0.00011956	0.000108213	0.000104417	0.000126119	0.000105346	0	0.000210626	0.000182637	3.2e-05	0.000122602	0.000201633	7.78e-05	0.000381752	0.000112064	0.000102685	0.000183027	0.000154599	0.000169338
BLAST_BGAL_LACSK Beta-galactosidase large subunit OS=Lactobacillus sakei GN=lacL PE=3 SV=1_Q48846	9.51e-05	0	0.000125676	0.000116347	4.63e-05	4.56e-05	0.000106413	4.85e-05	7.02e-05	5.49e-05	0.000118878	0	0	6.44e-05	0	0	0	0.00024667	0	0.000198255	0.000125955	0.000111865	0.000171409	0.000162107	0.000154065	0	0.000193874	0.000152253	0.000173936	0.000246589	0	0.00023912	7.21e-05	0	0.000189179	0.000105346	0.000134517	0.00015797	0.000243516	9.59e-05	9.2e-05	0.000100817	0.000116722	0.000381752	0.000168095	0.000102685	0.000122018	0.000154599	0.000282231
BLAST_CATH_MOUSE Pro-cathepsin H OS=Mus musculus GN=Ctsh PE=1 SV=2_P49935	0	0	0.000314189	0	0	0.000456038	0.000744892	0	0	0	0	0	0	0	0	0.000136631	0	0.000863345	0.000168805	0.00013217	0	0.00149154	0	0.000162107	0	0	0	0	0.000173936	0	0	0	0	0	0	0	0	0	0	0	0.00076626	0	0.000389075	0	5.6e-05	0.000462083	0	0	0
BLAST_RS7_CLOPS 30S ribosomal protein S7 OS=Clostridium perfringens (strain SM101 / Type A) GN=rpsG PE=3 SV=1_Q0SQE0	0.000190186	0.000575374	0.000188513	0	0	0.000547246	0.000283768	0.000388142	0.000526445	0.000329616	0	0.000291503	0	0.000515564	0	0	0.00157978	0.00024667	0.000844024	0	0	0	0	4.05e-05	0	9.87e-05	0	0	0	0	0	0.00017934	0	0.000522084	0	0	0	0	0	0	0.000214553	0	0.000272352	0	0	0	6.1e-05	0.000206132	0
Metagenome unknown	0	0	0	0	0.00120354	0	0.00148978	0	0	0	0	0	0	0	0	0	0	0.00123335	0.000168805	0	0	0.00115594	0	0.000283688	0	0	0	0	8.7e-05	0	0	0	0	0	0	0	0	0	0.000304395	0	0.000980813	0	0.00101159	0	0	0	0	0	0
Metagenome unknown	0.000237733	0.000287687	0.000251351	0	0.00013887	0.000136811	0.000177355	0.000145553	0.000140385	0.000164808	0.000237756	0.000194335	0	0.000128891	0.000185943	0.000136631	9.87e-05	0	0.00033761	0	0.000209925	0.000111865	0	0.000162107	0.000154065	9.87e-05	0.000258498	0.00022838	0.00021742	0.000123294	0.000267852	0	0.000144285	0	0	0.000210693	0	0	0.000243516	0.000159913	6.13e-05	5.04e-05	0.000194537	0	0	0	6.1e-05	0.000154599	0.000282231
Metagenome unknown	0.00137885	0.000632911	0	0	0.000231449	0.000182415	0.000283768	0	0.000456252	0	0.000475511	0.000291503	0.000184128	0.000193336	0.000557828	0.000819784	0	0.000123335	0	6.61e-05	0	0	0	0	0.000231098	9.87e-05	0	0.000190317	4.35e-05	0.000369883	0	0	0	0.000208834	0	0	0	0	0.000304395	0.000383791	6.13e-05	0	0	0	5.6e-05	0	0.000305045	0	0
BLAST_OLHYD_MACCJ Oleate hydratase OS=Macrococcus caseolyticus (strain JCSC5402) GN=MCCL_0076 PE=1 SV=1_B9E972	0	0.000287687	6.28e-05	0	0	9.12e-05	0	4.85e-05	0	0.000219744	0	0.000194335	0	0	0	0	0	0	0	0.000396511	8.4e-05	0	5.71e-05	0	3.85e-05	0.000246706	6.46e-05	3.81e-05	0	0	0.000107141	0	0	3.48e-05	0.000378358	0	0	5.27e-05	0.000243516	0.00012793	0	0.000100817	0	0.000572628	0	5.13e-05	0.000122018	0.000618397	0
Metagenome unknown	0	0	0	0	0	0.000456038	0.00117055	0	0	0	0	0	0	0.000128891	0	0	0	0.00271337	0	0	0	0.00093221	0	0.000162107	0	0	0	0	0.000521807	0.000123294	0	0	0	0	0.000252239	0	0	0	0	0	0	0	0.00120613	0	0	0	0	0.000103066	0
BLAST_SYM_GEOSE Methionine--tRNA ligase OS=Geobacillus stearothermophilus GN=metG PE=3 SV=1_P23920	4.75e-05	5.75e-05	0.000125676	0	0	4.56e-05	3.55e-05	0	7.02e-05	0	0.000118878	0	0	0	0.000185943	0.000136631	0	0.000123335	0.000506415	0.00013217	4.2e-05	3.73e-05	0.000228545	4.05e-05	3.85e-05	0.000148024	0.000258498	0	8.7e-05	0.000123294	0.000214282	0	7.21e-05	6.96e-05	0	0.000105346	0	0.000105313	6.09e-05	6.4e-05	0	0.000201633	0	0.000381752	0.000224127	5.13e-05	0.000305045	0	0.000169338
Metagenome unknown	0.000998479	0.000115075	0	0	9.26e-05	9.12e-05	0	0.000291107	0	0.000329616	0	0.000291503	0	0.000386673	0.000743771	0.000819784	0.000296209	0.00024667	0.000168805	0	0	0	0.000228545	0	0	0.000296048	0	0	0	4.11e-05	0	0	0	0.000104417	0.000126119	0.000210693	0	0	0	0.000543704	6.13e-05	5.04e-05	0	0.000190876	0.000392223	0	0.000244036	5.15e-05	0
BLAST_FLGL_BACSU Flagellar hook-associated protein 3 OS=Bacillus subtilis (strain 168) GN=flgL PE=3 SV=1_P96501	0	5.75e-05	0.000125676	0	4.63e-05	4.56e-05	7.09e-05	0	7.02e-05	0	0	4.86e-05	0	0	0	0	0	0	0	0.00013217	0.00025191	0	0	8.11e-05	0.000115549	0	0.000258498	7.61e-05	0.000347871	8.22e-05	0.000214282	5.98e-05	0.00205606	0	6.31e-05	0	0.000269034	0	0.000121758	3.2e-05	3.07e-05	0	7.78e-05	0	0	5.13e-05	0	0	0.000225785
BLAST_RS12_LACP7 30S ribosomal protein S12 OS=Lachnoclostridium phytofermentans (strain ATCC 700394 / DSM 18823 / ISDg) GN=rpsL PE=3 SV=1_A9KRZ1	0.000190186	0.000345224	0.000125676	0.000232693	9.26e-05	0.00036483	0	0.000339624	3.51e-05	0.000164808	0.000118878	0.00038867	0.00046032	0	0.000185943	0	0.000493681	0	0	0	0	0	0.000171409	0	7.7e-05	4.93e-05	0.000129249	7.61e-05	0	0.000246589	0	0.00035868	0	6.96e-05	0.000441418	5.27e-05	0	0	0.000182637	0.000287843	0.000183902	0.00030245	7.78e-05	0.000190876	0.000168095	0.000102685	0.000366055	0.000412265	0.000112892
BLAST_AMGDS_STRR6 Alpha-monoglucosyldiacylglycerol synthase OS=Streptococcus pneumoniae (strain ATCC BAA-255 / R6) GN=spr0982 PE=1 SV=1_Q8CWR6	9.51e-05	0	0.000125676	0	0.00013887	0	3.55e-05	0	7.02e-05	0	0	0	0	0.000128891	0.000371885	0.000409892	0.000197472	0	0.00033761	0.000198255	0.00025191	0	0.000114273	0	0.000308131	0	0.000258498	0.000304507	0	4.11e-05	0.000160711	0.00017934	0.000108213	0	0.000252239	0.000263366	0	5.27e-05	0	0.000383791	0	0.000151225	0.000116722	0.000381752	0.000112064	0.000102685	0.000122018	0.000206132	0
RL5_ECO55 50S ribosomal protein L5 OS=Escherichia coli (strain 55989 / EAEC) GN=rplE PE=3 SV=1	0	0	0	0	0	0	0	4.85e-05	0	0	0	0	0	0	0	0	0	0	0.000168805	0	0	0.00145425	0	4.05e-05	0.000231098	0	0	0	0	0	0	0	0	0	0	0.00168554	0.00161421	0.000105313	0	0	0	0.00136102	0	0	0.00117667	0	0	0	0
HES5_RAT Transcription factor HES-5 OS=Rattus norvegicus GN=Hes5 PE=2 SV=1	4.75e-05	0.000115075	0.000125676	0	9.26e-05	9.12e-05	7.09e-05	9.7e-05	3.51e-05	5.49e-05	0.000356633	0.000145751	9.21e-05	0	0.000185943	0.000273261	0.000394945	0.000123335	0.000506415	0.000198255	0.000125955	0	0.000171409	0.000121581	3.85e-05	0.000197365	0	3.81e-05	0.000130452	0	5.36e-05	5.98e-05	3.61e-05	6.96e-05	0.000126119	0	0.000269034	0.000210626	0.000243516	0	3.07e-05	0	3.89e-05	0.000190876	0.000112064	0.000154028	6.1e-05	0.000154599	5.64e-05
PHAE_PHAVU Erythroagglutinating phytohemagglutinin OS=Phaseolus vulgaris GN=DLEC1 PE=1 SV=1	0	0	0	0	0	0	0	0	0	0	0	0	0	0	0	0	0	0	0	0	0	0	0	0	0	0	0	0	0	0	0	0	0	0.000661307	0	0	0	0	0	0	0	0.000403266	0	0	0	0	0	0	0
BLAST_TPIS_PARD8 Triosephosphate isomerase OS=Parabacteroides distasonis (strain ATCC 8503 / DSM 20701 / CIP 104284 / JCM 5825 / NCTC 11152) GN=tpiA PE=3 SV=1_A6LFF0	0	0	0.000377027	0	0	0	0	9.7e-05	3.51e-05	0	0.000118878	4.86e-05	9.21e-05	0	0	0	9.87e-05	0	0	0.00013217	0	7.46e-05	0	0	0	0.000542754	0	0	0	8.22e-05	0	0	0	0.00132261	0	0	0	0	0	0	0.000704959	0.000554491	0	0	0.000448255	0	0.000183027	0.000154599	0
Metagenome unknown	0	0	0	0	0.000509189	0	0.000567537	0	0	0	0	0	0	0	0	0	0	0.00098668	0	0	0	0.00171527	0	8.11e-05	0	0	0	0	0.000434839	0.000945257	0	0.00083692	0	0	0	0	0.000538068	0	0.000182637	0	0	0	0.000817057	0	0	0	0	0	0
BLAST_FUMA_ECOLI Fumarate hydratase class I, aerobic OS=Escherichia coli (strain K12) GN=fumA PE=1 SV=2_P0AC33	0	0	0	0	0	0.000228019	0	0	7.02e-05	0	0	0	9.21e-05	0	0	0	0	0.00024667	0	0	4.2e-05	0.00294578	5.71e-05	0.000121581	7.7e-05	0	0	0	0	0	0	0	7.21e-05	0.000174028	6.31e-05	0	0	0	0	9.59e-05	0.00180837	0	0.00132285	0	5.6e-05	0.000359398	0	0	0
BLAST_THPR_THEMA RNA 2,3-cyclic phosphodiesterase OS=Thermotoga maritima (strain ATCC 43589 / MSB8 / DSM 3109 / JCM 10099) GN=TM_1860 PE=3 SV=1_Q9X2H4	0	5.75e-05	0	0	0.000231449	4.56e-05	0.000106413	0	0.000140385	0	0	9.72e-05	0	0	0	0	0	0	0	0.00013217	0.000209925	0.000111865	0.000114273	0.000324215	0.000154065	0	0.000129249	7.61e-05	0.000130452	0	0.000910698	5.98e-05	0.000541067	0	0.000189179	0.000105346	0	0.000105313	0	0	3.07e-05	0	0.00015563	0	0	0.000102685	0	0	5.64e-05
BLAST_RL16_DESHY 50S ribosomal protein L16 OS=Desulfitobacterium hafniense (strain Y51) GN=rplP PE=3 SV=1_Q250M5	0.000475466	0.000517837	0.000125676	0	0	0.000273623	0	0.000145553	0.000175482	0.000494424	0	9.72e-05	0.000552384	0.000193336	0	0	0.000592417	0.00024667	0.00033761	0	0	0	0.000171409	0	0	0.000345389	6.46e-05	0	0	0	0.000214282	0.00023912	0	0.000487279	0.000252239	0	0	0	0	6.4e-05	0.000153252	5.04e-05	0	0	0	0	0.000183027	0.000154599	0
Metagenome unknown	0	0	0	0	0	0	0	0	0	0	0	0	0	0	0	0	0	0	0	0	0	0	0	0	0	0.00611832	0	0	0	0	0	0	0	0	0	0	0	0	0	0	0	0	0	0	0.00156889	0.000256713	0	0	0
Metagenome unknown	0	0	0	0	0	0	0	0	0	0	0	0	0	0	0	0	0	0	0	0.00013217	0	0	0.001257	0.000324215	0	0	0	0	0	0.00189051	0	0	0	0.000800529	0	0	0	0	0	0	0.000551707	0.00030245	0	0	0	0	0	0	0
BLAST_DAPB_PELCD 4-hydroxy-tetrahydrodipicolinate reductase OS=Pelobacter carbinolicus (strain DSM 2380 / NBRC 103641 / GraBd1) GN=dapB PE=3 SV=1_Q3A1U6	0	5.75e-05	0	0.000232693	0	4.56e-05	7.09e-05	9.7e-05	0	0.000109872	0.000237756	9.72e-05	0.000368256	0	0	0.000136631	0.000197472	0	0.000168805	0.00026434	0	0	0.000342818	4.05e-05	0	4.93e-05	0.000258498	7.61e-05	0	4.11e-05	0	0.00023912	3.61e-05	0.000104417	0.000441418	0	0	0.000210626	6.09e-05	0	0	5.04e-05	3.89e-05	0	0	5.13e-05	0.000244036	0.000103066	0.000169338
BLAST_SECA_ANAPZ Protein translocase subunit SecA OS=Anaplasma phagocytophilum (strain HZ) GN=secA PE=3 SV=1_Q2GIT5	0.000237733	5.75e-05	6.28e-05	0.000232693	9.26e-05	4.56e-05	0	0.000145553	0	5.49e-05	0	0	0.000184128	0	0	0	9.87e-05	0	0.00033761	6.61e-05	0.000125955	3.73e-05	0.000114273	0.000324215	0.000115549	9.87e-05	0.000258498	7.61e-05	0.000130452	0	0.000107141	0.0002989	7.21e-05	6.96e-05	0.000315298	0.000105346	0	0.00015797	0.000182637	6.4e-05	3.07e-05	0.000100817	0.00015563	0	5.6e-05	0.000102685	0	0.000154599	5.64e-05
Metagenome unknown	0.000665652	0.00115075	0.000125676	0	0.000324029	0.000684057	0	9.7e-05	0	0.000878976	0	0	0	0	0	0	0.000691153	0	0	0	0	0	0	0	0	9.87e-05	0	0	0	0.000246589	0	0.00017934	0	0	0.000882835	0	0	0	0	0	0	0	0	0	0	0	0	0	0
Metagenome unknown	4.75e-05	0.000115075	0.000251351	0	0	0.000136811	3.55e-05	4.85e-05	0	0.000219744	0	0	9.21e-05	0.000193336	0.000743771	0	0	0.00024667	0	0.000528681	0	0	0.000228545	0	0	0.000246706	0.000193874	0	4.35e-05	4.11e-05	0.000214282	0	7.21e-05	0.000104417	0	5.27e-05	0.000672585	0.000210626	0	6.4e-05	0.000183902	0	0	0.000190876	0.000336191	0.00020537	0.000244036	0.000257666	0
Metagenome unknown	0	0	0	0	0.000185159	0.000684057	0.00219921	0	0	0	0	0	0	0	0	0	0	0.000863345	0	0	0	0.00108136	0	0.000121581	0	0	0	0	0	0	0	0	0	0	0.000567537	0	0.00107614	0	0	0	0.00113407	0	0.000817057	0	0	0.000308056	0	0	0
Metagenome unknown	0	0	0	0	0	4.56e-05	0.00212826	0	0	0	0	0	0	0	0	0	0	0	0	0	0	0	0	0.00154002	0	0	0	3.81e-05	0	0	0	0.0005978	0	0	0	0	0	0	0.000487033	0	0.000183902	0	0.00319041	0	0	0	0	0	0
Metagenome unknown	0.000190186	0.000172612	0.000251351	0.000232693	0.00013887	9.12e-05	0.000141884	0.000194071	0.000105289	0.000109872	0.000118878	0.000145751	0.000184128	0.000193336	0.000185943	0.000273261	0.000197472	0	0.00033761	6.61e-05	0	0	0.000342818	8.11e-05	0.000192582	0.000197365	0.000193874	7.61e-05	0.000130452	0.000164393	0	5.98e-05	0.000216427	0.000139222	0.000126119	0.000158019	0	0	6.09e-05	0.00012793	3.07e-05	0.000151225	7.78e-05	0	0.000280159	0.000102685	0.000122018	0.000154599	0.000112892
BLAST_KV401_HUMAN Immunoglobulin kappa variable 4-1 OS=Homo sapiens GN=IGKV4-1 PE=1 SV=1_P06312	0	0	0	0	0	0	0.000141884	0	0.000140385	0	0	0	0	0	0	0	0	0	0	0	0.00033588	0	0.000285682	0.000364742	0.000308131	0	6.46e-05	7.61e-05	0.000173936	0.000164393	0.000267852	5.98e-05	0.000216427	0	0	0.000210693	0	0.000210626	0	0.000223878	0	0	0	0.000763504	0.000112064	0	6.1e-05	0.000257666	0.000338677
BLAST_DGAL_SALTY D-galactose-binding periplasmic protein OS=Salmonella typhimurium (strain LT2 / SGSC1412 / ATCC 700720) GN=mglB PE=1 SV=2_P23905	0	0	0.000188513	0	9.26e-05	0.000228019	0	0.000242589	0.00066683	0	0.000832145	0.000485838	0	0	0	0	0.000197472	0	0	0	0	0	0	0	0	0	0.000904743	0	0	8.22e-05	0	5.98e-05	0	0	0.000630597	0	0	0	0.000182637	0	0.000521057	0	0.000272352	0	0	0	0	0.000772997	0.000677354
BLAST_PCCB_HALMT Propionyl-CoA carboxylase, carboxyltransferase subunit OS=Haloferax mediterranei (strain ATCC 33500 / DSM 1411 / JCM 8866 / NBRC 14739 / NCIMB 2177 / R-4) GN=pccB PE=1 SV=1_I3R7F1	0	0.000978136	0.000314189	0	9.26e-05	9.12e-05	0.00102866	0	0	0	0	0	0	0	0.000185943	0	0	0.00049334	0	6.61e-05	0	0.00022373	0	0	0	0.000148024	0	0	0	0.000287687	0	0	0	3.48e-05	0	0	0.000538068	0	6.09e-05	0	0.00104211	0.000151225	0.000427982	0	0	0.00020537	0	0	0
BLAST_SUSC_BACTN TonB-dependent receptor SusC OS=Bacteroides thetaiotaomicron (strain ATCC 29148 / DSM 2079 / NCTC 10582 / E50 / VPI-5482) GN=susC PE=1 SV=1_Q8A1G1	0	0	0	0	0.000277739	0.000273623	3.55e-05	0	0	0	0	0	0	0	0	0	0	0.000370005	0	0	0	0.00123052	0	0.000324215	0	0	0	0	0.00021742	0.000205491	0	0.00017934	0	0	0	0	0	0	0.000182637	0	0.00150187	0	7.78e-05	0	0	5.13e-05	0	0	0
BLAST_G1091_BACTN Glycosyl hydrolase family 109 protein 1 OS=Bacteroides thetaiotaomicron (strain ATCC 29148 / DSM 2079 / NCTC 10582 / E50 / VPI-5482) GN=BT_4243 PE=3 SV=1_Q89ZX8	0	0	0	0.000232693	4.63e-05	4.56e-05	0	9.7e-05	0	0	0	4.86e-05	0	6.44e-05	0	0.000409892	0	0.000123335	0.000168805	6.61e-05	0	0	0	4.05e-05	3.85e-05	4.93e-05	0	0	0.000260904	0	0	0.00011956	3.61e-05	0.000382862	0	0	0	0	0.000608791	0.00012793	6.13e-05	0.000201633	0	0	0	0.000102685	0	0.000154599	0.000112892
BLAST_FHL1_RAT Four and a half LIM domains protein 1 OS=Rattus norvegicus GN=Fhl1 PE=2 SV=1_Q9WUH4	0	0	0	0	0	9.12e-05	0.000212826	0	0.000140385	0	0	0	0	0	0	0	0.000296209	0	0	0.000330426	0	0.000298307	0	0	0	0	0.000129249	0.00079933	0	0.000164393	0	0	0	0	0	0	0.000403551	0.000105313	0	6.4e-05	0.000337154	0.000201633	7.78e-05	0	0	0	0	0.000309199	0.000112892
EFTS_ECOLU Elongation factor Ts OS=Escherichia coli O17:K52:H18 (strain UMN026 / ExPEC) GN=tsf PE=3 SV=1	0	0	0	0	0	0	0	0	0	0	0	0	0	0	0	0	0	0	0	0	0	0.00108136	0	0	7.7e-05	0	0	0	0	0	0	0	0	0	0	0.00152752	0.00255582	0	0	0	0	5.04e-05	0	0	0.000392223	0	0	0.000154599	0
Metagenome unknown	0	0	0	0	0	0.000684057	0.000496595	0	0	0	0	9.72e-05	0	0	0	0	0	0.00271337	0	0	0	0.00108136	0	0	0	0	0	0	0.00021742	0	0	0	7.21e-05	0	0.000315298	0	0	0	0.000182637	0	0.000521057	0.000100817	0.00132285	0	0	0.000102685	0	0	0.000225785
RL4_YERPY 50S ribosomal protein L4 OS=Yersinia pseudotuberculosis serotype O:3 (strain YPIII) GN=rplD PE=3 SV=1	0	0	0	0.000232693	0	0	0	0	0	0	0	0	0	6.44e-05	0	0	0	0	0	0	0	0.00111865	0	0	0.000192582	0	0	0	0	0	0	0	0	0	0.000126119	0.00142217	0.00147969	0.000526565	0	0	0	0.00136102	0	0	0.000392223	0	0	0	0
BLAST_BCA_STRA1 C protein alpha-antigen OS=Streptococcus agalactiae serotype Ia (strain ATCC 27591 / A909 / CDC SS700) GN=bca PE=1 SV=1_Q02192	0.000237733	0	0.000188513	0.000465387	0.000185159	0	0.000106413	0.000194071	0.000105289	0.000164808	0.000237756	0.000242919	0	0.000128891	0.000371885	0	0.000394945	0.00024667	0.000168805	0	4.2e-05	0.000149154	0.000228545	0.000121581	0	9.87e-05	0.000193874	0	0	4.11e-05	0.000267852	0.00023912	0.000144285	0	6.31e-05	0.000105346	0	0	0.000182637	0	0	5.04e-05	0.00015563	0.000572628	0	0.00020537	0	0.000154599	0.000282231
BLAST_TPIS_PANTR Triosephosphate isomerase OS=Pan troglodytes GN=TPI1 PE=2 SV=2_P60175	0	0	0	0	0	0	0.000106413	4.85e-05	0	0	0	9.72e-05	0	6.44e-05	0	0	0	0	0	0	0	0	5.71e-05	0	3.85e-05	4.93e-05	0	3.81e-05	0	0	0.00160711	0	0.00100999	6.96e-05	0	0	0.000134517	0	0	0.000511722	0	0	0.000583612	0.000190876	0.000336191	0.00020537	0	0.000154599	0
BLAST_MCSB_MOOTA Protein-arginine kinase OS=Moorella thermoacetica (strain ATCC 39073 / JCM 9320) GN=mcsB PE=3 SV=1_Q2RM40	9.51e-05	0.000115075	0.000188513	0	4.63e-05	0.000182415	7.09e-05	9.7e-05	7.02e-05	0.000219744	0.000118878	0.000194335	0.000368256	0	0.000185943	0.000136631	0.000197472	0.00024667	0.00033761	0.00026434	0.00016794	0	0.000114273	0	0.000115549	0.000148024	0	0.000152253	4.35e-05	0.000123294	0.000107141	0.00011956	0.000180356	0.000104417	0	0	0	0	0.000365275	9.59e-05	0.000153252	0.000100817	3.89e-05	0.000381752	0.000224127	0.000102685	6.1e-05	0.000154599	0
Metagenome unknown	0	0.00023015	0.000439864	0	0	0	0	0	0	0	0	0	0	0	0	0	0	0.00049334	0.00033761	0	0	0.000111865	0	4.05e-05	0	0	0	0	0	0	0	0	0	0	0.000126119	0	0	0.00373861	0.000121758	0	0	0	0	0	0.000224127	0.00195102	0	0.000309199	0
BLAST_HBD_CLOAB 3-hydroxybutyryl-CoA dehydrogenase OS=Clostridium acetobutylicum (strain ATCC 824 / DSM 792 / JCM 1419 / LMG 5710 / VKM B-1787) GN=hbd PE=1 SV=2_P52041	0	0	0	0	0.00171273	0	0	0	0	0	0	0	0	0	0	0	0	0	0	0.000396511	0	0	0.00114273	0	0	0	0.000452372	0	0	0	0.000374993	0.00017934	0	0	0	0	0	0	6.09e-05	0	0	0	0	0	0	0	0	0	0
Metagenome unknown	0	5.75e-05	0	0.00034904	0	0	0.000106413	4.85e-05	0.000105289	5.49e-05	0.000356633	0	9.21e-05	0.000128891	0.000185943	0.000136631	9.87e-05	0.000123335	0.00033761	0.000198255	0.000293895	0.000111865	0.000285682	0	0.000154065	0	0.000258498	0.000152253	0.000173936	0	0.000107141	0.0002989	0.000144285	6.96e-05	0.000189179	0.000210693	0	0.000105313	0	0.00012793	0	0.000100817	0	0.000381752	0.000224127	0	0.000183027	0.000103066	0.000112892
Metagenome unknown	0.00014264	0	0.000188513	0.000465387	0.00013887	0	0.000106413	0	0.000140385	0.000164808	0.000237756	0.000145751	0.000184128	0.000128891	0	0.000136631	0.000296209	0	0.000168805	0.000396511	0	0	0.000171409	8.11e-05	0	0.000148024	0.000193874	0	0	0	0	0.00011956	3.61e-05	0	0.000189179	0.000158019	0	0.000210626	0.000121758	0	0	0.000100817	0	0.000381752	0.000112064	0.000102685	0.000183027	0.000257666	0
BLAST_FEOB_HELPJ Fe(2+) transporter FeoB OS=Helicobacter pylori (strain J99 / ATCC 700824) GN=feoB PE=3 SV=1_Q9ZLF3	0.000190186	0.00023015	0	0.000116347	9.26e-05	0	0.000248297	9.7e-05	0.00115818	0	0	4.86e-05	0	0.000322227	0	0	0.0010861	0	0.00033761	0.00026434	0	0.000261019	0	0	0	0.00118419	0	0	4.35e-05	4.11e-05	0	0	3.61e-05	0.000139222	0.000441418	0	0	5.27e-05	0	0	3.07e-05	0	0	0	0.000224127	0	0.000488073	0.000206132	0
Metagenome unknown	0.000237733	5.75e-05	6.28e-05	0	0.000370319	0.000182415	0.000106413	0.000145553	0.000140385	0.000109872	0.000356633	9.72e-05	0	0.000193336	0	0.000409892	9.87e-05	0	0.00033761	0	0.000629776	0	5.71e-05	8.11e-05	0.000346647	4.93e-05	0	7.61e-05	0.000956647	0	0.000214282	5.98e-05	0.000108213	3.48e-05	0	0.000105346	0	0	0	0.000767582	3.07e-05	0	3.89e-05	0.000381752	0	5.13e-05	6.1e-05	5.15e-05	0
Metagenome unknown	4.75e-05	0.000115075	0.000188513	0.000232693	9.26e-05	0.000182415	0.000141884	0.000194071	0.000140385	0.000219744	0.000237756	0.000194335	0.000276192	0.000128891	0	0	0.000197472	0	0	0.00013217	0	0.000111865	0	0.000121581	0	9.87e-05	6.46e-05	0	0	0	0.000107141	0.0002989	0.000108213	0.000139222	0.000378358	0	0	0.000315939	0.000304395	0	0.000183902	5.04e-05	0.00015563	0	0.000112064	0.00020537	0.000305045	0.000206132	0.000169338
BLAST_HNS_SALT1 DNA-binding protein H-NS OS=Salmonella typhimurium (strain 14028s / SGSC 2262) GN=hns PE=1 SV=1_A0A0F6B244	0	0	0	0	0	0	0	4.85e-05	0	0	0.000475511	0	0	0	0	0	0	0	0	0	0	0.000894921	0	0	0.000115549	0	0	0	0	0	0	0	0	0	0	0.000790097	0.00188324	0	0	0	0	0.000252042	0	0	0.000448255	0	0	0.000103066	0.000112892
Metagenome unknown	0	0	0	0	0	0	0	0	0	5.49e-05	0	0	0	0	0	0.000136631	0	0	0	0	0	0	0.00371386	0	0	0.000444072	0	0	0	0	0	0	0	0	0	0	0	0	0	0	0	0	0	0	0	0	0	0	0
Metagenome unknown	9.51e-05	5.75e-05	6.28e-05	0	4.63e-05	0	7.09e-05	4.85e-05	7.02e-05	0.000109872	0.000237756	0	0.000184128	0	0	0	0	0	0	6.61e-05	0.000293895	0	0.000114273	4.05e-05	3.85e-05	0	0.000387747	0.00022838	8.7e-05	0	0	0.00017934	0.000144285	0	0.000378358	0.000158019	0	0.000315939	0.000304395	0.000159913	0.000122602	5.04e-05	0	0	5.6e-05	0.000154028	0.000122018	0	5.64e-05
Metagenome unknown	0	0	0	0	0	0.00127691	0	0	7.02e-05	0	0	0	0	0	0	0	0	0.000123335	0	0	0	0	0	0	0	0.00296048	0	0	0	0	0	0	0	0	0	0	0	0	0.00182637	0	0	0	0	0	0	0	0	0	0
BLAST_DHE2_CLOSY NAD-specific glutamate dehydrogenase OS=Clostridium symbiosum GN=gdh PE=1 SV=4_P24295	0.00014264	0.000172612	0.000251351	0	0.000277739	0.000182415	7.09e-05	0.000194071	0.000175482	0.00027468	0.000356633	0.000242919	0	0.000257782	0.000371885	0.000273261	0.000493681	0.00024667	0.00033761	0.00026434	0	7.46e-05	0	8.11e-05	0.000115549	0.000148024	0.000129249	0.00022838	4.35e-05	4.11e-05	0	0	0.000180356	0.000174028	0	0.000158019	0	0	6.09e-05	6.4e-05	9.2e-05	0	0.000116722	0.000190876	0	5.13e-05	0.000122018	0.000206132	0
Y351_CAUCR Putative outer membrane protein CC_0351 OS=Caulobacter crescentus (strain ATCC 19089 / CB15) GN=CC_0351 PE=3 SV=1	0.000190186	5.75e-05	0	0.00034904	0.000185159	9.12e-05	0.000141884	0	0	5.49e-05	0	9.72e-05	0	0.000193336	0	0.000409892	0	0	0.000168805	6.61e-05	0.000209925	7.46e-05	5.71e-05	8.11e-05	0.000154065	0	6.46e-05	0.000152253	0.000173936	0.000123294	0.000214282	0.00017934	0.000144285	0	0.000252239	0	0	5.27e-05	0.000243516	9.59e-05	3.07e-05	0.000151225	7.78e-05	0.000954381	0	0.000102685	0	0.000154599	0.000225785
Metagenome unknown	0	0	0	0	0	0	0	0	0	0	0	0	0	0	0	0	0	0.000616675	0	0	0	0	0	0	0	0	0	0	0	0	0	0	0	0	0	0	0	0	0	0	0	0.00131062	0.00031126	0	0	5.13e-05	0	0	0
GLYG5_SOYBN Glycinin OS=Glycine max PE=1 SV=1	0	0	6.28e-05	0	0	0	0	0	0	0	0	4.86e-05	0	0	0	0	0	0	0	0	0	0	0	0.00064843	0	0	0	0	0	0	0	0	0	0	0	0	0	0.000263283	0	0	0	0	0.000116722	0	0	0	0	0	0
Metagenome unknown	9.51e-05	0.000115075	0	0	0	9.12e-05	7.09e-05	0	0	0	0.000118878	9.72e-05	0	0.000257782	0.000557828	0.000409892	0.000197472	0.00024667	0.000506415	6.61e-05	0	7.46e-05	0.000171409	0	0.000154065	0.000197365	6.46e-05	7.61e-05	8.7e-05	0	0	0	0.000108213	0.000104417	0	5.27e-05	0	0	0	0.00012793	0.000245203	0	0	0	0.000224127	5.13e-05	6.1e-05	5.15e-05	0
Metagenome unknown	0	0.000172612	0.000251351	0.000116347	0	0.000136811	0	4.85e-05	0.000105289	5.49e-05	0.000237756	9.72e-05	0.000184128	0	0.000185943	0	0.000197472	0.000370005	0.00033761	6.61e-05	0	0.000111865	5.71e-05	0.000121581	0.000154065	0.000148024	0.000129249	3.81e-05	0	0.000246589	0	0.00017934	0.000108213	0.000174028	0	0.000158019	0.000134517	5.27e-05	0.000304395	6.4e-05	9.2e-05	0.000201633	7.78e-05	0	0	0.000102685	0.000122018	0.000103066	0.000225785
BLAST_DPO3_CLOTE DNA polymerase III PolC-type OS=Clostridium tetani (strain Massachusetts / E88) GN=polC PE=3 SV=1_Q895K2	0	0.000402762	0.000188513	0	0	0.000228019	0.000141884	0.000145553	0	0.000219744	0	0.000194335	0	0	0	0	0.000296209	0.000370005	0	0.000198255	0.00033588	0.000149154	0	0	7.7e-05	0.000197365	0	0	0.00021742	0	0.000214282	0.0002989	0	0.000174028	0.000189179	5.27e-05	0	0.00015797	0	9.59e-05	0.000214553	0.000201633	0.000233445	0	0	0.000308056	0.000122018	0.000257666	0
BLAST_LIPO_BACSU Lipoprotein LipO OS=Bacillus subtilis (strain 168) GN=lipO PE=1 SV=1_P37966	0	0	0.000188513	0	0	0.000456038	0	9.7e-05	0.000842312	0	0	9.72e-05	9.21e-05	0	0	0	0.000394945	0	0	6.61e-05	0	0	0	0.000162107	0	0.000641437	0	0	0	0	0	0.00071736	0	0.000974557	0.000315298	0	0	0	0.00066967	0	0.000122602	0	0.000194537	0	0	0	0.000183027	0	0.00112892
Metagenome unknown	0	0	0	0	4.63e-05	4.56e-05	0	0	0	0	0	0	0	0	0	0	0	0.00394672	0	0	0	0.000261019	0	0	0	0	0	0	0.00169587	0	0	0	0	0	0	0	0	0	0	0	0	0	0	0	0	0	0	0	0
BLAST_SYL_CARHZ Leucine--tRNA ligase OS=Carboxydothermus hydrogenoformans (strain ATCC BAA-161 / DSM 6008 / Z-2901) GN=leuS PE=3 SV=1_Q3AF30	0	0.000115075	0.000439864	0	4.63e-05	0.000684057	0.000212826	0.00043666	0.000280771	0.00247212	0	0.000340086	0	0.000128891	0.00111566	0	9.87e-05	0	0	0	0	0	0	0	0	0	0	0	0	0	0.000642846	0	0	0	0	0	0.000134517	0	0	0	0	0	0.000116722	0	0	0.000154028	0	0	0.00191917
BLAST_THLA_SYNWW Acetyl-CoA acetyltransferase OS=Syntrophomonas wolfei subsp. wolfei (strain DSM 2245B / Goettingen) GN=Swol_1934 PE=1 SV=1_Q0AVM3	0	0.00258918	0	0	0	0.000273623	0	0.00155257	7.02e-05	0	0	0.000145751	0	0	0	0	0.00128357	0.000616675	0.000168805	0	0	0	0	0	0	0	0	0	0	0	0	0	0	0.000765723	6.31e-05	0	0	0	0	0	0	0	0	0	0	0	0	0	0
BLAST_GALS_ECOLI HTH-type transcriptional regulator GalS OS=Escherichia coli (strain K12) GN=galS PE=1 SV=2_P25748	0.00014264	5.75e-05	0	0	9.26e-05	0.000136811	3.55e-05	0	7.02e-05	0	0.000356633	0	0	0.000257782	0.000371885	0.000273261	9.87e-05	0.000123335	0.000506415	0.00026434	8.4e-05	0	0.000171409	0	0	9.87e-05	6.46e-05	7.61e-05	0	4.11e-05	5.36e-05	0	0.000108213	0	0.000126119	0	0.000134517	0.000105313	6.09e-05	0	6.13e-05	0	3.89e-05	0	0.000224127	0.000154028	0.000122018	5.15e-05	0
BLAST_GUN1_STRRE Cellulase 1 OS=Streptomyces reticuli GN=cel1 PE=1 SV=1_Q05156	0	0	0	0	0	0	0	0	0	0	0	0	0	0	0	0	0	0	0	0	0	0	0	0	0	0.00108551	0	0	0	0	0	0	0	0.00274964	0	0	0	0	0	0	0	0.00030245	0	0	0	0	0	0	0
BLAST_SLAP_LYSSH Surface-layer 125 kDa protein OS=Lysinibacillus sphaericus PE=3 SV=1_P38537	0	0.00023015	0.000188513	0	0	0	0	9.7e-05	0	0	0	0	0.000184128	0	0	0.000136631	0	0	0	0.000528681	0	7.46e-05	5.71e-05	0	0	0.000345389	0.000258498	7.61e-05	0	0	0	0	0	0.0024712	0.000504477	0	0	0	0	0	0	0	0.00031126	0	0	0	0.000549082	0	0
BLAST_CEAM7_HUMAN Carcinoembryonic antigen-related cell adhesion molecule 7 OS=Homo sapiens GN=CEACAM7 PE=1 SV=1_Q14002	0.000760746	0.00023015	0	0	0	0	7.09e-05	0	0	0	0	0	0	0.000257782	0.000371885	0.000273261	0	0.00049334	0	0	0	0	0.000228545	0.000162107	0.000885876	0	0	0	0.000173936	0	0	0.0002989	0	0.000139222	0.000378358	0	0.000134517	0.000105313	0	0	0	0	7.78e-05	0.000381752	0	0	0	0	0
BLAST_GLNA3_BACFR Glutamine synthetase OS=Bacteroides fragilis (strain YCH46) GN=glnA PE=1 SV=2_P15623	0	0	0.000628378	0.000116347	4.63e-05	0	0.000106413	0	0	5.49e-05	0	4.86e-05	0	6.44e-05	0.000557828	0.000136631	0	0	0.000168805	0.000330426	8.4e-05	0.00156611	0	0	0	4.93e-05	0	0	0	8.22e-05	5.36e-05	0	0	0.000591695	0.000315298	0.000105346	0.000134517	0	0	0	0.000459756	0	0.000933779	0	0	5.13e-05	6.1e-05	5.15e-05	0
BLAST_SUSC_BACTN TonB-dependent receptor SusC OS=Bacteroides thetaiotaomicron (strain ATCC 29148 / DSM 2079 / NCTC 10582 / E50 / VPI-5482) GN=susC PE=1 SV=1_Q8A1G1	0	0	0	0	0.000740638	0	0	0	0	0	0	0	0	0	0	0	0	0.00098668	0	0	0	0.00126781	0	0.000283688	0	0	0	0	8.7e-05	0	0	0	0	0	0	0	0	0	0.000304395	0	0.00110341	0	0	0	0	0	0	0	0
Metagenome unknown	0	0	0	0.000116347	0	0	0	4.85e-05	7.02e-05	0	0	0.000145751	0	0.000193336	0.000185943	0.000683153	0	0	0.00033761	0	0	0	0.000971318	0	0.00084736	0	0.000129249	0	0.000391355	0	0	0.00011956	0.000216427	0.000243639	0	0.00110614	0	0	0	0.000959478	0	0	0	0	0.000504286	0	0.000305045	0	0
BLAST_G6PI_CLOB8 Glucose-6-phosphate isomerase OS=Clostridium beijerinckii (strain ATCC 51743 / NCIMB 8052) GN=pgi PE=3 SV=1_A6LQ99	0.000190186	0.000115075	0.000188513	0	0.000231449	0.000638453	7.09e-05	4.85e-05	0.000210578	0.000109872	0	9.72e-05	0.000184128	0.000128891	0	0	0.000394945	0.000123335	0.000168805	0	0	0	0	0	0	0.000148024	0	0	0	0	0	0.00095648	0	0.000696112	0.000504477	0	0	0	0.000365275	0	0.000306504	0	3.89e-05	0	0	0	0.000366055	0.000206132	0.000225785
Metagenome unknown	0	0	0	0	0	0.00150493	0.00120602	0	0	0	0	0	0	0	0	0	0	0.00135669	0	0	0	0.000186442	0	0.000688956	0	0	0	0	0	0	0	0	0	0	0	0	0	0	0	0	3.07e-05	0	0.000350167	0	0	5.13e-05	0	0	0
BLAST_YBEM_ECOLI Putative protein YbeM OS=Escherichia coli (strain K12) GN=ybeM PE=5 SV=1_P0DP64	0.00014264	0	0.000251351	0	0.000231449	0.000182415	0.000106413	0.000194071	0	0.000219744	0.000237756	0.000194335	0.000184128	0.000193336	0.000185943	0	0.000493681	0.000370005	0	0.00013217	0	7.46e-05	0.000171409	0.000121581	0.000115549	0.000148024	0	3.81e-05	0	0	0.000267852	0.00023912	0	0	0.000126119	0	0	0.000105313	0	6.4e-05	0.000122602	5.04e-05	7.78e-05	0.000572628	0	0.000102685	0.000122018	0.000154599	0.000112892
Metagenome unknown	0	0	0	0	0.000185159	0.000638453	0.000780363	0	0	0	0	0	0	0	0	0	0	0.00185002	0	0	0.00025191	0.00104407	0	0	0	0	0	0	0.000260904	0	0	0	0	0	0.000315298	0	0.000403551	0	0	0	0.000275854	0	0.00147848	0	0	0.000667454	0	0	0
Metagenome unknown	0	0	0	0	0.00115725	0	7.09e-05	0	0	0	0	0	0	6.44e-05	0	0	0	0.000370005	0	0	0	0.00141696	0	0.00064843	0	0	0	0	0.000173936	0	0	0	0	0	0	0	0	0	0.000730549	0	0.00150187	0	0	0	0	0	0	0	0
BLAST_LEUC_ELUMP 3-isopropylmalate dehydratase large subunit OS=Elusimicrobium minutum (strain Pei191) GN=leuC PE=3 SV=1_B2KBD7	0	0.000115075	0	0.00034904	0	0	7.09e-05	0	7.02e-05	0	0	4.86e-05	9.21e-05	0	0	0	0	0	0	0.000198255	0	0	0	0.000202634	0	0.000197365	0.000193874	0.000190317	0	0.000205491	0.000160711	0.00017934	0	0	0	0	0	0.000579222	0	0	0.000153252	0.000100817	7.78e-05	0	5.6e-05	0.000154028	0.000122018	0.000257666	5.64e-05
BLAST_MRAZ_THEPX Transcriptional regulator MraZ OS=Thermoanaerobacter sp. (strain X514) GN=mraZ PE=3 SV=1_B0K3H9	0.00014264	5.75e-05	0.000188513	0.000232693	4.63e-05	0.000136811	0.000141884	9.7e-05	0	0.000164808	0.000118878	0.000242919	0.000184128	0.000193336	0.000557828	0	0.000394945	0.000123335	0.000506415	0.000330426	0	0	0.000114273	0	3.85e-05	4.93e-05	0.000129249	3.81e-05	0.000130452	0.000123294	0	0.00017934	3.61e-05	6.96e-05	0.000252239	0.000158019	0.000134517	0.00015797	0.000243516	0	0	0.000252042	0	0	0.000112064	0	0.000305045	0.000103066	0.000169338
Metagenome unknown	0	0	0	0	0	0	0	0	0	5.49e-05	0	0	0	0	0	0	0	0	0	0.00026434	0	0	0	0	0	0	0	0	0	0	0	0	0	0	0	0	0	0	0.00213077	0	0	0	0	0	0.000448255	0	0	0	0
BLAST_RFBJ_YERPU CDP-abequose synthase OS=Yersinia pseudotuberculosis GN=rfbJ PE=1 SV=1_Q05342	9.51e-05	5.75e-05	0	0	0	0.000136811	0.000106413	9.7e-05	0.000140385	0.000109872	0	0.000145751	0	0.000257782	0.000371885	0	9.87e-05	0	0	0	8.4e-05	0	0.000171409	0.000324215	3.85e-05	9.87e-05	0.000323123	0.00011419	0.000173936	4.11e-05	0.000160711	5.98e-05	0.000108213	0.000139222	0	5.27e-05	0.000134517	0.000368596	0.000182637	0	0	0	0.000116722	0	0.000112064	0.000102685	0.000122018	5.15e-05	5.64e-05
BLAST_PCKG_ACIBT Phosphoenolpyruvate carboxykinase [GTP] OS=Acinetobacter baumannii (strain ATCC 17978 / CIP 53.77 / LMG 1025 / NCDC KC755 / 5377) GN=pckG PE=3 SV=2_A3M840	0	0.000287687	0	0	0	4.56e-05	0	0.00145553	0.000140385	0	0	9.72e-05	0	0	0.000185943	0.000136631	0.000888626	0.000123335	0	0	8.4e-05	0.000596614	0	4.05e-05	3.85e-05	0	0	0	0	8.22e-05	0	0	0	0.00194911	0	0	0.000134517	0	0	0	9.2e-05	0	0.000272352	0	0	0.000102685	0	0	0
Metagenome unknown	0.000190186	5.75e-05	0.000188513	0.000116347	0.000185159	0.000182415	7.09e-05	4.85e-05	0.000105289	5.49e-05	0.000356633	9.72e-05	0	0.000193336	0.000185943	0	0	0	0.000168805	0.000198255	8.4e-05	0	0.000171409	8.11e-05	0.000115549	4.93e-05	0.000129249	0.000152253	0.00021742	0.000205491	5.36e-05	0.00017934	0.000180356	0	0.000189179	5.27e-05	0.000134517	0.000105313	0.000243516	6.4e-05	0	0.000252042	3.89e-05	0.000190876	5.6e-05	0.000154028	0	0.000154599	0.000225785
Metagenome unknown	9.51e-05	5.75e-05	0.000188513	0.000232693	0	0	0.000106413	0.000145553	3.51e-05	5.49e-05	0.000237756	0.000194335	9.21e-05	0	0	0	0.000197472	0	0	6.61e-05	8.4e-05	7.46e-05	0.000285682	0.000121581	7.7e-05	0.000197365	0.000323123	0.00011419	0.000130452	0.000205491	0.000107141	0	0.000108213	0.000208834	0.000252239	0	0	0.000105313	6.09e-05	0.00012793	0.000122602	0	0.000116722	0	0.000168095	0.000102685	0.000244036	5.15e-05	0
EFTS_GRAFK Elongation factor Ts OS=Gramella forsetii (strain KT0803) GN=tsf PE=3 SV=1	0.000190186	0	0	0.000232693	0	4.56e-05	0.000106413	0	0.000210578	0	0	0	0	6.44e-05	0	0	0	0	0	0	0.000209925	0	0.000285682	0.000405268	0.000462196	0	0.000193874	0.000190317	0.000260904	0.000246589	0.000214282	0.0002989	0.000144285	0	0	0.000210693	0	0.000315939	0	0.000191896	0	0	0	0.000190876	5.6e-05	0	6.1e-05	0.000309199	0.000338677
Metagenome unknown	0	0.000115075	0	0.000232693	9.26e-05	0	3.55e-05	0	7.02e-05	0	0	0	0	0.000322227	0.000371885	0.000136631	0.000197472	0	0.000168805	6.61e-05	0.00016794	0	0.000457091	8.11e-05	0.000154065	9.87e-05	0	7.61e-05	0.000173936	4.11e-05	0.000214282	5.98e-05	0.000288569	0	0	0	0.000269034	0	6.09e-05	6.4e-05	3.07e-05	0	7.78e-05	0.000190876	0.000448255	5.13e-05	0	0	5.64e-05
Metagenome unknown	0	0	0	0.000116347	0	0.000273623	0.00145431	0.000145553	0.000280771	0	0	0	0.000184128	0.000193336	0	0	0	0	0	0	0	0	0	0	7.7e-05	0	0	0	0	0.00332895	0	0	0	0	0	0	0	0	0.000182637	0	0	0	0	0	0	0.000102685	0	0	0
BLAST_YBJX_ECOLI Uncharacterized protein YbjX OS=Escherichia coli (strain K12) GN=ybjX PE=4 SV=1_P75829	0	0.000172612	0.000188513	0.000232693	0	9.12e-05	0.000106413	0.000145553	0.000105289	0.000109872	0.000237756	0.000145751	0	6.44e-05	0	0	0.000296209	0.000123335	0	0.00013217	0	0.000111865	0.000171409	0.000121581	0.000115549	9.87e-05	0.000129249	0	4.35e-05	0.000246589	0	0.00017934	0.000108213	0.000104417	0.000189179	0	0	0.000105313	0	3.2e-05	0.000122602	0.000151225	3.89e-05	0.000572628	0.000112064	0.000154028	6.1e-05	5.15e-05	0.000169338
BLAST_RL5_DESRM 50S ribosomal protein L5 OS=Desulfotomaculum reducens (strain MI-1) GN=rplE PE=3 SV=1_A4J123	0	0.00023015	0.000125676	0	0	9.12e-05	0.000141884	0.000145553	0.000491349	0	0	0.000194335	0.000184128	0.000322227	0	0.000136631	0.000691153	0	0.00033761	0	0	0	0	4.05e-05	0	9.87e-05	0	0	0	0	0	0.00053802	0	0.000278445	0.000378358	0	0	0	0	0	0.000367805	0.000100817	0	0	0.000168095	0.000102685	0.000244036	0.000309199	0
BLAST_SERC_BACC1 Phosphoserine aminotransferase OS=Bacillus cereus (strain ATCC 10987 / NRS 248) GN=serC PE=3 SV=1_Q734W9	0.000190186	0.000115075	0	0.000116347	0.000462899	9.12e-05	0	0.000145553	3.51e-05	0	0	9.72e-05	0.000184128	0.000193336	0	0.000409892	9.87e-05	0	0	0.000594766	0	0	0	0	0	0.00039473	0	0	0	0.000246589	0	0	0	0.00107897	0	0.000263366	0.000134517	0	0	0	0.000459756	0.000655308	3.89e-05	0	0.000224127	0	0	0.000103066	5.64e-05
Metagenome unknown	4.75e-05	0	6.28e-05	0.000116347	0	4.56e-05	0.000106413	4.85e-05	3.51e-05	5.49e-05	0.000237756	0	0	0	0	0.000136631	0	0.00024667	0	0.00013217	0.000125955	7.46e-05	0.000171409	0.000121581	0.000115549	0	0.000193874	0.000152253	0.000130452	0.000205491	0	0.00023912	7.21e-05	0	0.000189179	0.000105346	0.000134517	0.000105313	0.000243516	6.4e-05	9.2e-05	5.04e-05	0.000116722	0.000381752	0.000168095	0.000102685	0	5.15e-05	0.000169338
Metagenome unknown	0	0	0	0	0	0	0	0	0	0	0	0	0	0	0	0	0	0	0	0	0	0	0	0	0	0	0	0	0	0.00583594	0	0	0	0	0	0	0	0	0	0	0	0	0	0	0	0	0	0	0
BLAST_YHYA_PSESN Uncharacterized protein in HyuA 5region (Fragment) OS=Pseudomonas sp. (strain NS671) PE=4 SV=1_Q01265	0.000190186	0.000172612	0.000125676	0	0	9.12e-05	7.09e-05	0.000145553	7.02e-05	0.000164808	0.000237756	0.000145751	0	0.000193336	0.000557828	0.000136631	0.000296209	0.000123335	0.000168805	0.00013217	0	7.46e-05	0.000171409	0	7.7e-05	0.000197365	0.000129249	7.61e-05	0	8.22e-05	0	5.98e-05	0.000144285	0.000104417	0	0	0	0.000105313	6.09e-05	9.59e-05	9.2e-05	0	0.000116722	0.000572628	0.000112064	0.000154028	0	0	5.64e-05
BLAST_CHEB1_RHIEC Probable chemotaxis response regulator protein-glutamate methylesterase 1 OS=Rhizobium etli (strain CFN 42 / ATCC 51251) GN=cheB1 PE=3 SV=1_Q2KCH8	4.75e-05	0	0	0.000116347	0	0	0	0	0	0	0.000475511	0	0	0	0	0	0	0	0	0	0.00033588	0.000149154	0.000342818	0.000283688	0.000269614	0	0.000323123	0.000380633	0.000260904	0.000287687	0.000482134	0.00011956	0.000252498	0	6.31e-05	0.000263366	0	0.000315939	0	0.000223878	0	0	0	0.000190876	0.000336191	0	0.000244036	0	0
Metagenome unknown	0	0.00293441	0	0.00325771	0	0	0	0	0	0	0	0	0	0	0	0	0	0	0	0	0	0	0	0	0	0	0	0	0	0	0	0.00017934	0	0.00261042	0	0	0	0	0	0	0	0	0	0	0	0	0	0	0
BCHC2_ARATH BEACH domain-containing protein C2 OS=Arabidopsis thaliana GN=BCHC2 PE=1 SV=1	0	0	0	0.00034904	0	0	0	0	0.000175482	0.00027468	0.000118878	0.000194335	0.000368256	0.000193336	0	0	0	0	0	6.61e-05	4.2e-05	0	0.000228545	8.11e-05	0	0	0.000193874	0.000152253	0	4.11e-05	0.000267852	0.00041846	0.000180356	0	0.000315298	0.000263366	0	0.000263283	0	0	0	0	0	0.000190876	0	0	0	0.000309199	0.000282231
BLAST_DNAB_NOSS1 Replicative DNA helicase OS=Nostoc sp. (strain PCC 7120 / SAG 25.82 / UTEX 2576) GN=dnaB PE=3 SV=1_Q8YZA1	0.00028528	0.000172612	0.00144527	0	0	0.000136811	0	0.000339624	0	0	0	0.000437254	0	0	0.000371885	0	0	0	0.000844024	0	8.4e-05	0	0	0	0	0	0.000387747	0	0	0.000123294	0	0	0	0.000139222	0	0	0	0	0.000365275	0	0	0	0.000350167	0	0	0.000308056	6.1e-05	0	0
Metagenome unknown	0	5.75e-05	0.000816891	0	0	0	0.000638479	0	0	0	0	0	0	0	0	0	0	0	0	0	0	0	0	0	0	0.000641437	0	7.61e-05	0	0.0023015	0	0	0	0.000139222	0	0	0.000807103	0	0	0.00012793	0.000613008	0	0.00031126	0	0	0	0.000183027	0	0
BLAST_FUCO_ECOLI Lactaldehyde reductase OS=Escherichia coli (strain K12) GN=fucO PE=1 SV=2_P0A9S1	0.000427919	0	0	0	0.000185159	0.000182415	0.000177355	0	3.51e-05	5.49e-05	0	4.86e-05	0	0	0	0	9.87e-05	0	0	0	0	0	0	4.05e-05	0.000500713	0.000493413	0	0	0	0.00045208	0	0.0002989	0	3.48e-05	0	0	0	0	0.000487033	0	6.13e-05	0.000201633	0.00015563	0	0	0.00020537	0	0	0.000790246
Metagenome unknown	0	0	0	0	0	0	0	0	0	0	0	0.000583005	0.000276192	0	0	0	0	0	0	0	0	0.000484749	0	0	0	0.000296048	0	0	0.00165239	0	0	0	0.000504996	0.000974557	0	0	0.00121065	5.27e-05	0	0	0	0.00030245	0.000350167	0	0	0.00020537	0.000122018	0	0.00174983
Metagenome unknown	0	0	0.000251351	0	0	0	0	0	3.51e-05	0	0	0	0	0	0	0	0	0	0	0	0	0.000410172	0	0	0	9.87e-05	0	0	0.00256555	8.22e-05	0	0	0.000577138	0.00055689	0	0	0.000807103	0	0	0	0	0.000403266	0.00046689	0	0	0.000410741	0	0	0.00191917
BLAST_FIMZ_ECOLI Fimbriae Z protein OS=Escherichia coli (strain K12) GN=fimZ PE=3 SV=1_P0AEL8	0	5.75e-05	6.28e-05	0.00034904	0	0	0.000141884	0	0.000105289	0	0.000356633	4.86e-05	0	6.44e-05	0	0.000136631	0	0	0.000168805	6.61e-05	0	0	0.000171409	0.000162107	0.000115549	0	0.000258498	0.000190317	4.35e-05	0	0	0.0002989	0	3.48e-05	0.000126119	5.27e-05	0	0.000210626	0.000182637	9.59e-05	0.000153252	5.04e-05	0.00015563	0.000572628	0.000168095	0.000102685	0.000183027	0.000206132	5.64e-05
BLAST_EUTE_SALTY Ethanolamine utilization protein EutE OS=Salmonella typhimurium (strain LT2 / SGSC1412 / ATCC 700720) GN=eutE PE=4 SV=2_P41793	0.000332826	5.75e-05	0.000125676	0	0.000231449	9.12e-05	0.000177355	0	0.000140385	5.49e-05	0	0.000194335	0	0.000128891	0	0	0	0	0	0	0.00016794	0.000149154	0.000171409	0.000162107	0.000115549	0	0.000193874	0.00011419	0.000173936	0.000164393	0.000214282	0.00017934	0.000144285	0	0	0	0.000134517	0.000105313	0.000182637	0.00012793	9.2e-05	0	0.00015563	0	0.000168095	0.000102685	6.1e-05	0.000103066	0.000395123
BLAST_EFG_MOOTA Elongation factor G OS=Moorella thermoacetica (strain ATCC 39073 / JCM 9320) GN=fusA PE=3 SV=1_Q2RFP4	4.75e-05	0.000115075	0.000251351	0.00104712	0.000324029	0.000182415	0.000141884	9.7e-05	0	0.000164808	0.000118878	0.000145751	0.00046032	0	0	0	0.000493681	0	0	0	0	0	0	8.11e-05	0	0	6.46e-05	0.000152253	0.00021742	4.11e-05	0.000160711	0.00053802	0	0.000104417	0.000252239	5.27e-05	0	0.000105313	0.000182637	0	3.07e-05	5.04e-05	0	0.000572628	0	0	0.000122018	5.15e-05	0.000112892
Metagenome unknown	9.51e-05	5.75e-05	0.000125676	0.000232693	9.26e-05	0.000136811	0.000106413	9.7e-05	7.02e-05	5.49e-05	0.000356633	0.000145751	0.000368256	0.000193336	0.000371885	0.000273261	0.000296209	0.000123335	0.000675219	0.000198255	0	0	0.000171409	4.05e-05	0	9.87e-05	0	0	0	0.000123294	0	0.00011956	3.61e-05	0.000174028	6.31e-05	0	0.000403551	0	0.000121758	0	0.000122602	5.04e-05	3.89e-05	0.000381752	0	0.000154028	6.1e-05	0.000103066	5.64e-05
BLAST_GLNQ_BACSU Glutamine transport ATP-binding protein GlnQ OS=Bacillus subtilis (strain 168) GN=glnQ PE=2 SV=1_O34677	4.75e-05	0	0	0	0	0	0	0	0	0	0	0	0	0	0	0.000136631	0	0	0	0	0.00016794	0.000111865	0.000285682	0.000162107	0.000154065	9.87e-05	0.000323123	0.00011419	0.000173936	0.000164393	5.36e-05	0.00017934	0.000144285	0	6.31e-05	0.000210693	0	0.000263283	0.000121758	0.00012793	0	5.04e-05	0.00015563	0.000763504	0	0.000256713	0.000122018	0.000206132	0.000169338
BLAST_RARA_COXBU Replication-associated recombination protein A OS=Coxiella burnetii (strain RSA 493 / Nine Mile phase I) GN=rarA PE=3 SV=3_P39918	0.00014264	0.000115075	0.000125676	0.000232693	4.63e-05	9.12e-05	0.000141884	0.000145553	0.000140385	5.49e-05	0.000475511	9.72e-05	0	0.000193336	0	0.000136631	0.000296209	0.000123335	0	0.00026434	0	3.73e-05	0.000114273	0.000121581	0	0.000148024	0.000193874	0	0	4.11e-05	0	0.00017934	0.000108213	0.000104417	0.000189179	0	0	0.00015797	0.000182637	6.4e-05	9.2e-05	0.000100817	3.89e-05	0.000572628	5.6e-05	0.000154028	0.000122018	0.000103066	5.64e-05
Metagenome unknown	9.51e-05	0	0	0.00069808	0.00013887	0.000136811	3.55e-05	9.7e-05	7.02e-05	0.000164808	0.000356633	0	9.21e-05	0.000128891	0.000185943	0.000273261	0	0.000370005	0.00033761	0.000198255	8.4e-05	0	0.000114273	0	0.000154065	0	0	3.81e-05	0.000130452	0	0.000160711	0.00041846	0.000108213	0	0.000126119	0.000316039	0	0.000210626	0	0.00012793	0	0	3.89e-05	0.000572628	5.6e-05	0	0.000122018	5.15e-05	0.000169338
BLAST_AT4_ORYSJ Acyl transferase 4 OS=Oryza sativa subsp. japonica GN=AT4 PE=1 SV=1_Q5JNT2	0.00014264	0.000115075	0.000125676	0.00034904	9.26e-05	0.000136811	0.000106413	0.000145553	0.000140385	0.000219744	0.000356633	9.72e-05	0	0.000128891	0	0.000273261	0.000296209	0	0	0.00026434	0	0	0.000171409	8.11e-05	0	9.87e-05	0.000258498	0	0	8.22e-05	0	0.00017934	0.000108213	6.96e-05	0.000252239	0	0	0.000210626	0.000121758	6.4e-05	6.13e-05	0.000151225	0	0.000381752	0	0.000154028	0.000122018	0.000154599	5.64e-05
BLAST_ACSE_MOOTH 5-methyltetrahydrofolate:corrinoid/iron-sulfur protein co-methyltransferase OS=Moorella thermoacetica GN=acsE PE=1 SV=2_Q46389	0.000190186	0	0	0	0	0	0	0.00126146	0	0.000164808	0	0	0.000552384	0.0007089	0.000185943	0.000819784	0	0	0	0	0	0	0	0	0	0	0	0	0	0	0.00117855	0	0.000144285	0	0	0	0	0	0.000365275	0	0	5.04e-05	0	0	0	5.13e-05	0	0.000412265	0
Metagenome unknown	9.51e-05	0.00023015	0	0.00034904	4.63e-05	0.000136811	0.000141884	0.000194071	0.000105289	0.000164808	0.000237756	0.000194335	0.000276192	0.000193336	0.000371885	0.000409892	0.000296209	0.00024667	0.000506415	0.00026434	0	0	0.000228545	0	0	0.000148024	0.000129249	7.61e-05	0	0.000164393	0	5.98e-05	0.000108213	0.000104417	6.31e-05	0	0	0.000105313	6.09e-05	0	9.2e-05	5.04e-05	0	0	5.6e-05	0.00020537	6.1e-05	0.000103066	0
BLAST_RS13_LACP7 30S ribosomal protein S13 OS=Lachnoclostridium phytofermentans (strain ATCC 700394 / DSM 18823 / ISDg) GN=rpsM PE=3 SV=1_A9KJG9	0	0.000460299	0	0.000465387	0	4.56e-05	0	0.000242589	0.000210578	0.000109872	0	0.000485838	0.000368256	0.000128891	0	0.000409892	0.000592417	0	0	0.00026434	8.4e-05	0	0	0	0	0	0	0	0	0	0	0	0	0.000208834	0.000315298	0	0.000134517	0	0	0	0	5.04e-05	0	0.000381752	0.000224127	0	0	0.000309199	0
BLAST_GLN1B_STRCO Glutamine synthetase OS=Streptomyces coelicolor (strain ATCC BAA-471 / A3(2) / M145) GN=glnA PE=3 SV=1_P15106	0	0.000287687	0.000251351	0.000232693	0.000231449	0.000273623	0.000744892	0	0.000175482	0	0	0	0.00101271	0.00154669	0	0	0.000197472	0.000123335	0.000168805	0	0	0	0.000399954	0	0	4.93e-05	6.46e-05	0	0	0	0	0.00023912	0.000144285	0.000104417	0.000756716	0	0	0.000421252	0	0	0	0	0	0	0	0	0	0	0
Metagenome unknown	0.00014264	0.000172612	0.000251351	0.000232693	0.000185159	0.000228019	0.000212826	0.000194071	0.000140385	0.000164808	0.000237756	0.000340086	0.000368256	0.000128891	0	0	9.87e-05	0.000123335	0	0.00026434	0	3.73e-05	0	4.05e-05	0	9.87e-05	0.000129249	0	0	8.22e-05	0	0.00011956	3.61e-05	0.000174028	0.000126119	5.27e-05	0	5.27e-05	0.000182637	0	0.000122602	0.000151225	0	0	0	0	0.000122018	0.000154599	0.000225785
BLAST_ACRR_ECOLI HTH-type transcriptional regulator AcrR OS=Escherichia coli (strain K12) GN=acrR PE=1 SV=1_P0ACS9	4.75e-05	5.75e-05	0	0.000232693	9.26e-05	4.56e-05	3.55e-05	0	0	0	0	0	9.21e-05	0	0	0.000136631	0	0	0	0.000198255	0.000125955	3.73e-05	0.000399954	4.05e-05	3.85e-05	4.93e-05	6.46e-05	7.61e-05	8.7e-05	0.000123294	0	0.00011956	0.000216427	0	0.000252239	0.000263366	0	0	0	0.000223878	9.2e-05	5.04e-05	0	0	5.6e-05	0.000154028	6.1e-05	0	0
BLAST_RIBR_BACSU RNA-binding riboflavin kinase RibR OS=Bacillus subtilis (strain 168) GN=ribR PE=2 SV=1_P94465	4.75e-05	0	0.000188513	0.00034904	9.26e-05	0.000136811	0.000141884	0	3.51e-05	0	0.000118878	9.72e-05	0.000368256	0.000128891	0.000371885	0.000136631	0	0	0.00033761	6.61e-05	0.00016794	0.000111865	0.000228545	4.05e-05	0.000115549	0	0.000129249	0.00011419	0.000260904	0.000205491	5.36e-05	0.00023912	0.000144285	0	0.000252239	5.27e-05	0	0.00015797	0.000121758	0.000191896	9.2e-05	0	7.78e-05	0.000190876	5.6e-05	0.000154028	6.1e-05	5.15e-05	5.64e-05
CASA1_SHEEP Alpha-S1-casein OS=Ovis aries GN=CSN1S1 PE=1 SV=3	0	0	0	0	0	9.12e-05	0	4.85e-05	0	0	0.000118878	0	0	0	0	0	0	0	0	0	0.00025191	0	0	0	0.000192582	0	0.000258498	0	0	4.11e-05	5.36e-05	0.00203252	0	0	6.31e-05	0	0.000134517	0.000105313	6.09e-05	0	0	0	0	0	0	0	0	0	0
BLAST_HSP16_ONYPE Probable Hsp20 family chaperone OS=Onion yellows phytoplasma (strain OY-M) GN=PAM_028 PE=1 SV=1_P81958	0	0.000287687	0	0.00034904	9.26e-05	0.000273623	0.000532066	0.000242589	0.000280771	0.00027468	0	9.72e-05	0.000368256	0	0.00111566	0	0	0.00074001	0.000168805	6.61e-05	0	0	0	0	0	0	0.000129249	0	0	0.000328785	0	0.00035868	0.000216427	0.000139222	0	0	0.000269034	0.000105313	0	0.000191896	0	0.000151225	0	0	0.000336191	0.00020537	0	5.15e-05	0
Metagenome unknown	9.51e-05	0	0	0.00069808	0.00013887	0.000136811	3.55e-05	9.7e-05	7.02e-05	0.000164808	0.000356633	0	9.21e-05	0.000128891	0.000185943	0.000273261	0	0.000370005	0.00033761	0.000198255	8.4e-05	0	0.000114273	0	0.000154065	0	0	3.81e-05	0.000130452	0	0.000160711	0.00041846	0.000108213	0	0.000126119	0.000316039	0	0.000210626	0	0.00012793	0	0	3.89e-05	0.000381752	5.6e-05	0	0.000122018	5.15e-05	0.000169338
BLAST_DGAL_SALTY D-galactose-binding periplasmic protein OS=Salmonella typhimurium (strain LT2 / SGSC1412 / ATCC 700720) GN=mglB PE=1 SV=2_P23905	0.000570559	0	0	0.000116347	0	4.56e-05	0	0.000533696	0.000280771	0	0	0.000242919	0.000736513	6.44e-05	0	0	0	0	0.000506415	0	0	0	0	0.000283688	0	0	0	0	0	0	0	0.00017934	7.21e-05	0	6.31e-05	0	0	0	0.000243516	0	0.000153252	0	0	0	0	0	0.000793118	0.000257666	0
BLAST_PURS_BACSU Phosphoribosylformylglycinamidine synthase subunit PurS OS=Bacillus subtilis (strain 168) GN=purS PE=1 SV=1_P12049	0	0.00023015	0.000125676	0.000116347	0	9.12e-05	7.09e-05	9.7e-05	0.000140385	0.000219744	0.000237756	0.000194335	0	0.000128891	0	0.000273261	9.87e-05	0.000123335	0	0	0	7.46e-05	5.71e-05	4.05e-05	3.85e-05	9.87e-05	6.46e-05	3.81e-05	8.7e-05	0.000164393	0	0.00011956	0.000180356	0.000174028	6.31e-05	0	0.000134517	0.000210626	0.000304395	6.4e-05	0.000153252	0.000100817	0.000116722	0	0	0.000154028	6.1e-05	0.000206132	5.64e-05
Metagenome unknown	0.000237733	0.000172612	0.000125676	0.00034904	0.000185159	0.000182415	0.000141884	0.000145553	7.02e-05	5.49e-05	0.000237756	0.000194335	0.000368256	0.000193336	0.000185943	0.000409892	0.000197472	0.00024667	0	0	0	3.73e-05	0.000114273	0	0.000115549	0.000197365	6.46e-05	3.81e-05	0	0.000164393	0	5.98e-05	3.61e-05	6.96e-05	6.31e-05	0	0	0.000105313	0.000182637	0.00012793	6.13e-05	0.000100817	3.89e-05	0	0.000168095	0.000102685	0.000183027	0	0
Metagenome unknown	0.00014264	5.75e-05	0	0.000581734	0.00013887	4.56e-05	7.09e-05	0	0	0.000164808	0.000118878	0.000340086	0.000368256	6.44e-05	0	0	0	0	0	0	0	0	0.000228545	0	0.000192582	9.87e-05	0.000193874	0.000152253	0	0	5.36e-05	0.00035868	0	3.48e-05	0.000315298	0.000263366	0	0.000368596	0	0.00012793	0	0	0	0	5.6e-05	0	6.1e-05	0.000257666	0
RL9_SALTY 50S ribosomal protein L9 OS=Salmonella typhimurium (strain LT2 / SGSC1412 / ATCC 700720) GN=rplI PE=3 SV=1	0	0	0	0	0	0	0	0	0	0	0	0	0	0	0	0	0	0	0.000168805	0	0	0.000708479	0	0	7.7e-05	0	0	0	0	0	0	0	0	0	0	0.00131683	0.00242131	0	0	0	0	0.000403266	7.78e-05	0	0.000448255	0	0	0.000103066	0
TIG_VIBCM Trigger factor OS=Vibrio cholerae serotype O1 (strain M66-2) GN=tig PE=3 SV=1	0	0	0	0	0	0	0	0	0	0	0	0	0	0	0	0	9.87e-05	0	0	0	0	0.00100679	0	0	3.85e-05	0	0	0	4.35e-05	0	0	0	0	0	0	0.00142217	0.00188324	0.000368596	0	0	0	0.00090735	0	0	0.000392223	0	0	0.000154599	0
GUB_NICPL Lichenase OS=Nicotiana plumbaginifolia GN=GN1 PE=2 SV=3	0.000190186	0	0	0	0	0	0	0	0.000421156	0	0	0.00038867	0.000552384	0	0	0.00122968	0.000888626	0.00024667	0	0	0	0.000261019	0	0	0	0.000296048	0.000258498	0	0	0	0	0	0	0	0	0.000316039	0	0.000105313	0	0	0	0	0	0	0	0	0	0	0
BLAST_SP2P_BACSU Stage II sporulation protein P OS=Bacillus subtilis (strain 168) GN=spoIIP PE=4 SV=1_P37968	0.000332826	0.000115075	0.00201081	0	0	0.000182415	0	0.000291107	0	0	0	0.000534422	0.000368256	0	0.000185943	0	0	0	0.00033761	0	0	0	0	0	0	0	6.46e-05	0	0	0.000123294	0	0	0	0.000104417	0	0	0	0.000105313	0.000243516	0	0	0	0.000350167	0	0	0.00020537	6.1e-05	0	0
BLAST_ACRB_ECOLI Multidrug efflux pump subunit AcrB OS=Escherichia coli (strain K12) GN=acrB PE=1 SV=1_P31224	0	0	0	0	0	0	0	0	0	0	0	0	0	0	0	0	0.000197472	0	0	6.61e-05	0	0	0.000342818	0	0	0	0.000258498	7.61e-05	0.000304388	0.000205491	0	0.0002989	0	0	0.000252239	0.000316039	0	0.00015797	0	0	0	0	0	0	0	0.000102685	0	0	0
Metagenome unknown	0	0	0	0	0	0	0	0	0	0	0	0	0	0	0	0	0	0	0	0.000330426	0	7.46e-05	0	0.000607903	0	0	0	0	0	0	0	0.00023912	0	0.000243639	0.000504477	0	0	0	0.000547912	0	0	0	7.78e-05	0	0	0	0	0	0.000790246
BLAST_PDUA_SALTY Propanediol utilization protein PduA OS=Salmonella typhimurium (strain LT2 / SGSC1412 / ATCC 700720) GN=pduA PE=1 SV=1_P0A1C7	4.75e-05	0.000115075	0.000125676	0	0	9.12e-05	7.09e-05	9.7e-05	7.02e-05	0.000109872	0.000356633	0.000194335	0	6.44e-05	0.000185943	0.000136631	0.000197472	0	0	0	0	0.000149154	0	0.000202634	0.000192582	0.000444072	0.000258498	7.61e-05	8.7e-05	0	0	0	0.000288569	3.48e-05	0	5.27e-05	0	0	0	9.59e-05	0.000245203	0	7.78e-05	0.000190876	0	0.000102685	0	0.000103066	0
BLAST_G3P_CLOPA Glyceraldehyde-3-phosphate dehydrogenase OS=Clostridium pasteurianum GN=gap PE=1 SV=1_Q59309	0	0	0.000125676	0	0	4.56e-05	0	0.00111591	0	0	0	0	9.21e-05	0	0	0.000136631	0	0.00024667	0	0	8.4e-05	0	0	8.11e-05	0	0	0	0	8.7e-05	0	0.000267852	0	0.00032464	0	0	0	0	0	0.000243516	0	0	0	0	0	0	0	0	0	0
BLAST_GRCA_VIBF1 Autonomous glycyl radical cofactor OS=Vibrio fischeri (strain ATCC 700601 / ES114) GN=grcA PE=3 SV=1_Q5E2Y6	0.00028528	0.000287687	0.000188513	0.000116347	0	4.56e-05	3.55e-05	0.000194071	0.000105289	0.000384552	0	0.000242919	0.00046032	0	0.000929714	0	0.000296209	0.00024667	0.000168805	0.000330426	0	0.000111865	0	0	0	9.87e-05	0.000129249	0	0	0	0	0	0	6.96e-05	0.000378358	0	0	0	6.09e-05	0	0.000122602	0	0.00015563	0	5.6e-05	0.000308056	0.000244036	0.000103066	0.000112892
BLAST_MSHA_ARTS2 D-inositol 3-phosphate glycosyltransferase OS=Arthrobacter sp. (strain FB24) GN=mshA PE=3 SV=1_A0JZ09	0.00014264	0.000172612	6.28e-05	0.00069808	0.000231449	9.12e-05	0.000141884	4.85e-05	3.51e-05	5.49e-05	0	0	0.000644449	0.000128891	0.000371885	0	0.000197472	0	0.00033761	0	0.00025191	0	5.71e-05	0	0.000192582	0	6.46e-05	0.000152253	0.000130452	0.000123294	0.000267852	0.00011956	7.21e-05	0	0.000126119	0.000158019	0	0	0	0.000159913	9.2e-05	0	0	0.000572628	0.000336191	0.000102685	0	0	0
Metagenome unknown	0	0	0	0	0	0	0	0	0	0	0	0	0	0	0	0	0	0	0	6.61e-05	4.2e-05	0	0.000228545	0.00117528	0	0	0.000258498	0.000152253	0.000260904	4.11e-05	0	0	7.21e-05	0	0	5.27e-05	0	0.000526565	0	0.000159913	0	5.04e-05	0	0	0	5.13e-05	0	0	0
Metagenome unknown	0	0	0	0	0.000185159	0	0	0	0	0	0	0	0	0	0	0	0	0	0	0.00013217	0	0.000894921	5.71e-05	0	0.000231098	0	0.000193874	0	0	0	0	0	0	0	0	0.00126416	0.00107614	0.000315939	0	0	0	0.000403266	0	0	0.000504286	0	0	0	0
BLAST_SASA_SYNE7 Adaptive-response sensory-kinase SasA OS=Synechococcus elongatus (strain PCC 7942) GN=sasA PE=1 SV=2_Q06904	0	0.000172612	0.000125676	0	0	4.56e-05	3.55e-05	9.7e-05	0.000105289	0.000109872	0.000237756	0.000145751	0	6.44e-05	0.000185943	0	0.000197472	0	0	0.000198255	4.2e-05	7.46e-05	0.000114273	0.000121581	7.7e-05	0	0.000193874	7.61e-05	8.7e-05	0.000164393	0.000160711	0.00011956	0.000108213	6.96e-05	0	5.27e-05	0	0.000105313	0.000121758	3.2e-05	0.000122602	0.000151225	0.000233445	0.000381752	0.000168095	0.00020537	6.1e-05	0.000103066	0.000169338
CRCB1_MYCTU Putative fluoride ion transporter CrcB 1 OS=Mycobacterium tuberculosis (strain ATCC 25618 / H37Rv) GN=crcB1 PE=1 SV=1	9.51e-05	0	0.000188513	0	0.00013887	0	0	0	7.02e-05	0	0	0	0	0.000128891	0.000557828	0.000136631	0.000296209	0.000123335	0.000168805	0.00026434	0.00016794	0	5.71e-05	0	0.000231098	0	0.000258498	0.000304507	0	8.22e-05	0.000214282	0.00017934	0.000108213	0	0.000189179	0.000263366	0	5.27e-05	0	0.000319826	0	0.000151225	0.000116722	0.000190876	0.000112064	0.000102685	0.000122018	0.000206132	0
BLAST_RS8_CLOTH 30S ribosomal protein S8 OS=Clostridium thermocellum (strain ATCC 27405 / DSM 1237 / NBRC 103400 / NCIMB 10682 / NRRL B-4536 / VPI 7372) GN=rpsH PE=3 SV=1_A3DJI6	9.51e-05	0.000172612	0	0.00034904	4.63e-05	0.000228019	7.09e-05	0.000194071	0.000245674	0.000219744	0	0.000145751	0.000368256	0.000193336	0	0.000136631	0.000296209	0	0.000506415	6.61e-05	8.4e-05	7.46e-05	0	4.05e-05	0	9.87e-05	0	0	0	0	0	0.00035868	0	0.000139222	0.000252239	0	0	0.00015797	0.000121758	0	0.000183902	0.000100817	0.000194537	0	0.000112064	0.000154028	0.000244036	5.15e-05	0
Metagenome unknown	4.75e-05	0	0	0	0	0	0	0	0	0	0	0	0	0	0	0	9.87e-05	0	0	0	0.00025191	3.73e-05	0	0	0	0	0	0.00593788	4.35e-05	0	0	0	0	0	6.31e-05	0	0	0	0	0	0	0	0	0	0	0	0	0	0
BLAST_ATPB_CALS8 ATP synthase subunit beta OS=Caldicellulosiruptor saccharolyticus (strain ATCC 43494 / DSM 8903 / Tp8T 6331) GN=atpD PE=3 SV=1_A4XKX0	0	5.75e-05	0	0.000465387	4.63e-05	0	7.09e-05	4.85e-05	7.02e-05	5.49e-05	0	0	0	6.44e-05	0	0	0	0.000123335	0.000844024	0.000396511	0.00016794	0	0.000228545	0	0.000154065	0	0.000129249	0.00022838	0.000173936	0	0	0.00035868	0	3.48e-05	6.31e-05	0.000316039	0	0.000263283	0	9.59e-05	0	5.04e-05	0	0	0.000168095	0	6.1e-05	5.15e-05	0.000112892
BLAST_UGPC_BURTA sn-glycerol-3-phosphate import ATP-binding protein UgpC OS=Burkholderia thailandensis (strain ATCC 700388 / DSM 13276 / CIP 106301 / E264) GN=ugpC PE=3 SV=1_Q2SU77	0.000237733	0.000172612	0.000125676	0.00034904	0.000185159	0.000182415	0.000141884	0.000145553	7.02e-05	0	0.000237756	0.000242919	0.000276192	0.000193336	0.000185943	0.000409892	0.000197472	0.00024667	0	0	0	3.73e-05	0.000114273	0	0.000115549	0.000197365	6.46e-05	3.81e-05	0	0.000164393	0	5.98e-05	7.21e-05	6.96e-05	6.31e-05	0	0	0.000105313	0.000182637	0.00012793	6.13e-05	0.000100817	3.89e-05	0	0.000168095	0.000102685	0.000183027	0	0
BLAST_CADH1_HUMAN Cadherin-1 OS=Homo sapiens GN=CDH1 PE=1 SV=3_P12830	0	0	0	0	9.26e-05	0	0.000141884	0	0	0	0	0	0	0	0	0	0	0	0	0.00026434	0.00016794	0	0.000114273	0.000162107	0.000539229	0	0.000387747	7.61e-05	0	0.000534276	0	5.98e-05	0	0	0	0	0.000269034	0	0	6.4e-05	0	0.000151225	0	0	0	0.000102685	6.1e-05	0.000103066	0
Metagenome unknown	0	0.000287687	0.000439864	0	0	0.00036483	0.000177355	9.7e-05	0.000175482	0.000329616	0	0.000194335	0.000552384	6.44e-05	0	0	9.87e-05	0	0.000168805	0.000198255	0	7.46e-05	0	0.000121581	0	0.000148024	6.46e-05	0	0	0	0	0.0002989	7.21e-05	0.000104417	0.000252239	0	0	0.00015797	0.000365275	0	0	0.000100817	7.78e-05	0	0.000224127	0.000256713	0.000305045	0.000206132	0.000112892
RS5_SALCH 30S ribosomal protein S5 OS=Salmonella choleraesuis (strain SC-B67) GN=rpsE PE=3 SV=1	0	0	0	0	0	0	0	9.7e-05	0	0	0	0	0	0	0	0	0	0	0	0	0	0.00130509	0	0	7.7e-05	0	0	0	0	0	0	5.98e-05	0	0	6.31e-05	0.00158019	0.00121065	0.00015797	0	0	3.07e-05	0.000403266	0	0	0.000952541	0	0	5.15e-05	0
Metagenome unknown	4.75e-05	0	0	0	4.63e-05	0	0	0	0	0	0.000118878	0	9.21e-05	0	0	0	0	0	0.000168805	0	0.000209925	7.46e-05	0.000228545	0.000162107	0.000115549	0	0.000193874	0.00011419	0.000173936	0	0.000160711	0.00017934	7.21e-05	6.96e-05	0.000126119	0.000105346	0.000134517	0.000210626	0.000182637	0.00012793	9.2e-05	5.04e-05	0.000116722	0.000381752	0.000168095	0.000154028	0.000122018	5.15e-05	0.000169338
BLAST_CFA53_HUMAN Cilia- and flagella-associated protein 53 OS=Homo sapiens GN=CFAP53 PE=1 SV=2_Q96M91	4.75e-05	0	0	0	4.63e-05	0	0	0	0	0	0.000118878	0	0	0	0	0	0	0	0.000168805	0	0.000209925	7.46e-05	0.000228545	0.000162107	0.000115549	0	0.000193874	0.00011419	0.000173936	0	0.000160711	0.00017934	7.21e-05	6.96e-05	0.000126119	0.000105346	0.000134517	0.000210626	0.000182637	0.00012793	9.2e-05	5.04e-05	0.000116722	0.000190876	0.000168095	0.000154028	0.000122018	5.15e-05	0.000169338
BLAST_RS5_CLOTH 30S ribosomal protein S5 OS=Clostridium thermocellum (strain ATCC 27405 / DSM 1237 / NBRC 103400 / NCIMB 10682 / NRRL B-4536 / VPI 7372) GN=rpsE PE=3 SV=1_A3DJI9	0.000427919	0.000287687	0.000251351	0.00034904	0.000277739	0	0.000248297	0.000630731	0.000842312	0.000164808	0.000118878	0.000145751	0	0.000386673	0	0.000683153	0.000394945	0	0	0	0	0	0	0	7.7e-05	9.87e-05	0	0	0	0	0	0	0	3.48e-05	0	0	0	0	0	3.2e-05	0.000122602	5.04e-05	0	0	0.000392223	0.00020537	0.000305045	0.000103066	0
BLAST_SUSC_BACTN TonB-dependent receptor SusC OS=Bacteroides thetaiotaomicron (strain ATCC 29148 / DSM 2079 / NCTC 10582 / E50 / VPI-5482) GN=susC PE=1 SV=1_Q8A1G1	0	0.00023015	0	0	0.00476786	0	0	0	0	0	0	0	0	0	0	0	0	0	0	0	0	0	0	0	0	0	0	0	0	0	0	0	0	0	6.31e-05	0	0	0	0.000243516	0	0.00236008	0	0	0	0	0	0	0	0
Metagenome unknown	0	0	0	0	0	0	0	0	0	0	0	0	0	0	0	0.00368903	0	0	0	0	0	0.000894921	0	0	0	0	0.000323123	0	0	0	0.00155354	0	0	0.000835335	0	0	0	0	0	0	0	0	0	0	0	0.00020537	0.000122018	0	0
BLAST_IOLC_BACVZ 5-dehydro-2-deoxygluconokinase OS=Bacillus velezensis (strain DSM 23117 / BGSC 10A6 / FZB42) GN=iolC PE=3 SV=1_A7ZAH9	0	0	0.000754053	0	0	0.00036483	0	0.000485178	0	0	0	0.000485838	0	0	0	0.000546523	0	0	0	6.61e-05	0	3.73e-05	0	0	0	0	0.000258498	7.61e-05	0	0	0.000589275	0	0	0.000452473	0	0	0	0	0	0	0.000183902	0	0	0	0	0.000564769	0.000122018	5.15e-05	0
BLAST_PRDA_ACESD D-proline reductase proprotein PrdA OS=Acetoanaerobium sticklandii (strain ATCC 12662 / DSM 519 / JCM 1433 / NCIMB 10654) GN=prdA PE=1 SV=2_Q9Z4P6	0	0.000115075	0	0.00034904	0.000185159	0.000136811	0.000212826	9.7e-05	0.000175482	0	0	9.72e-05	0.000552384	0.000193336	0	0	0.000197472	0	0	0	0	0	0	0	0	0	0.000129249	0.000266443	0	0.000246589	0	0	0.000108213	6.96e-05	0	0	0	0.000263283	0.000304395	0	0.000306504	5.04e-05	3.89e-05	0	0	5.13e-05	0.000488073	0.000309199	0.000225785
Metagenome unknown	4.75e-05	5.75e-05	0	0.000232693	9.26e-05	0	0	0	0	0	0.000237756	0	9.21e-05	0	0	0.000136631	0	0	0.000168805	0	8.4e-05	0.000111865	0.000228545	8.11e-05	0.000154065	0	0.000129249	0.00011419	8.7e-05	0	5.36e-05	0.00023912	0.000108213	0	0.000189179	5.27e-05	0	0.000210626	0.000182637	0.000159913	6.13e-05	5.04e-05	0.000116722	0.000381752	0.000112064	0.00020537	0.000183027	0.000103066	0.000112892
[truncated: 41,717 more rows]
[truncated: 46 more columns]

## Sheet: Significant Hits
Metaproteins	Classification	BLAST_KCP_MOUSE Kielin/chordin-like protein OS=Mus musculus GN=Kcp PE=1 SV=2_Q3U492	Classification	BLAST_UGPC3_RHIEC sn-glycerol-3-phosphate import ATP-binding protein UgpC 3 OS=Rhizobium etli (strain CFN 42 / ATCC 51251) GN=ugpC3 PE=3 SV=1_Q2K1C8	Classification	ILVC_CLOBB Ketol-acid reductoisomerase (NADP(+)) OS=Clostridium botulinum (strain Eklund 17B / Type B) GN=ilvC PE=3 SV=1	Classification	S10A9_HUMAN Protein S100-A9 OS=Homo sapiens GN=S100A9 PE=1 SV=1	Classification	SCONB_ARTOC Probable E3 ubiquitin ligase complex SCF subunit sconB OS=Arthroderma otae (strain ATCC MYA-4605 / CBS 113480) GN=sconB PE=3 SV=1	Classification	RS3_AGARV 30S ribosomal protein S3 OS=Agathobacter rectalis (strain ATCC 33656 / DSM 3377 / JCM 17463 / KCTC 5835 / VPI 0990) GN=rpsC PE=3 SV=1	Classification	BLAST_FTHS2_DESHY Formate--tetrahydrofolate ligase 2 OS=Desulfitobacterium hafniense (strain Y51) GN=fhs2 PE=3 SV=1_Q24ZZ8	Classification	BLAST_RS2_DESRM 30S ribosomal protein S2 OS=Desulfotomaculum reducens (strain MI-1) GN=rpsB PE=3 SV=1_A4J5Z3	Classification	BLAST_ACDS_CLOAB Acyl-CoA dehydrogenase, short-chain specific OS=Clostridium acetobutylicum (strain ATCC 824 / DSM 792 / JCM 1419 / LMG 5710 / VKM B-1787) GN=bcd PE=1 SV=1_P52042	Classification	BLAST_G3P_CLOPA Glyceraldehyde-3-phosphate dehydrogenase OS=Clostridium pasteurianum GN=gap PE=1 SV=1_Q59309				Classification	BLAST_NPM_HUMAN Nucleophosmin OS=Homo sapiens GN=NPM1 PE=1 SV=2_P06748
[truncated: 5,954 more rows]

[truncated: 11 more sheets: Summary ROC, Kielin chordin like protein, sn glycerol 3 phosphate , Ketol acid reductoisomerase , Protein S100 A9, ubiquitin ligase, 30S ribosomal protein S3, Formate--tetrahydrofolate ligas, 30S ribosomal protein S2, Acyl CoA dehydrogenase, GAPD]
