# Supplementary material for: Discovering Biomarkers for Non-Alcoholic Steatohepatitis Patients with and without Hepatocellular Carcinoma Using Fecal Metaproteomics
Source: Int J Mol Sci. 2022 Aug 9;23(16):8841. doi: 10.3390/ijms23168841 (PMC9408600; doi:10.3390/ijms23168841)
Supplement: Supplementary file 1 [file ijms-23-08841-s001.zip › Supplementary Table S6.xlsx]

## Sheet: Tabelle1
	Metaprotein	Abundance (percentage of all idendified spectra)	Family	p-value	KEGG-ID	KEGG-Definition
NASH vs. Control	24	0.00296759	Unassigned Family	6.0369e-06	K00626	acetyl-CoA C-acetyltransferase
	540	0.000224832	Unassigned Family	1.16523e-07	K11276	nucleophosmin 1
	12945	5.33839e-05	Flavobacteriaceae	3.46436e-06	K01921	D-alanine-D-alanine ligase
	14319	0.000224103	Bacillaceae	2.22894e-06	K00703	starch synthase
	14469	4.24916e-05	Enterobacteriaceae	7.80323e-05	-	-
	17441	9.26038e-05	Chlamydiaceae	0.000118866	K03733	integrase/recombinase XerC
	42673	2.85747e-05	Helicobacteraceae	0.000426019	K02316	DNA primase
	Metaprotein	Abundance (percentage of all idendified spectra)	Family	p-value	KEGG-ID	KEGG-Definition
HCC vs. Control	540	0.000224832	Unassigned Family	1.76497e-11	K11276	nucleophosmin 1
	1432	5.85004e-05	Unassigned Family	0.00114843	K18682	ribonucrease Y
	14084	0.000129546	Listeriaceae	0.000182185	-	-
	14315	0.000308311	Corynebacteriaceae	1.4286e-05	K00134	glyceraldehyde 3-phosphate dehydrogenase
	22489	6.54421e-05	Unassigned Family	2.02846e-06	-	-
	Metaprotein	Abundance (percentage of all idendified spectra)	Family	p-value	KEGG-ID	KEGG-Definition
NASH vs. HCC	16	0.00028652	Unassigned Family	0.0522197	K02890	large subunit ribosomal protein L22
	16	0.00028652	Unassigned Family	0.0522197	K02965	small subunit ribosomal protein S19
	1680	0.000119492	Unassigned Family	0.0878238	K01358	ATP-dependent Clp protease, protease subunit
	12644	0.000225889	Bacillaceae	0.0472963	K02358	elongation factor Tu
	13930	9.68939e-05	Muridae	0.0337117	K01131	steryl-sulfatase
	16816	8.67707e-05	Porphyromonadaceae	0.00516353	K01258	tripeptide aminopeptidase
	18194	4.37441e-05	Unassigned Family	0.000797326	-	-
	22489	6.54421e-05	Unassigned Family	0.0362722	-	-
	26273	4.83812e-05	Brassicaceae	0.0356736	-	-
	26557	6.85837e-05	Brassicaceae	0.0200095	-	-
	27073	2.44263e-05	Unassigned Family	0.00193695	-	-
	Metaprotein	Abundance (percentage of all idendified spectra)	Family	p-value	KEGG-ID	KEGG-Definition
NASH vs. HCC vs. Control	16	0.00028652	Unassigned Family	0.0522197	K02890	large subunit ribosomal protein L22
	16	0.00028652	Unassigned Family	0.0522197	K02965	small subunit ribosomal protein S19
	540	0.000224832	Unassigned Family	1.16523e-07	K11276	nucleophosmin 1
	1432	5.85004e-05	Unassigned Family	0.00114843	K18682	ribonucrease Y
	1680	0.000119492	Unassigned Family	0.0878238	K01358	ATP-dependent Clp protease, protease subunit
	13930	9.68939e-05	Muridae	0.0337117	K01131	steryl-sulfatase
	14319	0.000224103	Bacillaceae	2.22894e-06	K00703	starch synthase
	16816	8.67707e-05	Porphyromonadaceae	0.00516353	K01258	tripeptide aminopeptidase
	22489	6.54421e-05	Unassigned Family	2.02846e-06	-	-
	26273	4.83812e-05	Brassicaceae	0.0356736	-	-
	26557	6.85837e-05	Brassicaceae	0.0200095	-	-
	27073	2.44263e-05	Unassigned Family	0.00193695	-	-
